# Supplementary material for: A non-conducting role of the Cav1.4 Ca2+ channel drives homeostatic plasticity at the cone photoreceptor synapse
Source: eLife. 2024 Nov 12;13:RP94908. doi: 10.7554/eLife.94908 (PMC11556788; doi:10.7554/eLife.94908)
Supplement: Figure 2—figure supplement 1—source data 1. [file elife-94908-fig2-figsupp1-data1.xlsx]

## Sheet: Sheet1
WT (0.15 mV/ms)	WT (0.5 mV/ms)	G369i KI (0.15 mV/ms)	G369i KI (0.5 mV/ms)
-10.64	-8.35	-0.33	-0.61
-4.83	-7.4	-0.06	-0.73
-6.27	-7.46	0.34	1.07
-11.01	-2.08	0.8	0.56
-9.67	-4.49	-0.38	0.94
-4.4		-0.18	0.15
		0.35	-0.073
		-0.26
