# Supplementary material for: A non-conducting role of the Cav1.4 Ca2+ channel drives homeostatic plasticity at the cone photoreceptor synapse
Source: eLife. 2024 Nov 12;13:RP94908. doi: 10.7554/eLife.94908 (PMC11556788; doi:10.7554/eLife.94908)
Supplement: Figure 2—source data 1. [file elife-94908-fig2-data1.xlsx]

## Sheet: Figure 2
	Figure 2c: Voltage gated calcium channel current-voltage plot																Figure 2d: Normalized conductance (activation)																Figure 2f: Normalized current (inactivation)												Figure 2h: Prepulse voltage inactivation
step voltage (mV)	WT															Step voltage (mV)	wild type															Step voltage (mV)	wild type												WT P1	WT P2	G369i KI P1	G369i KI P2
-80	0	0	0	0	0	0	0	0	0		1.63871	0	0			-80	0	0	0	0	0	0	0	0	0	-0.0192467		0	0			-90	0.878233	0.949215	0.940434	0.940015	0.881399	1	0.911209	0.958316					-32.59	-33.07	-12.36	-3.58
-75	0	0	0	0	0	0	0	0	0		-1.35093	0	0			-75	0	0	0	0	0	0	0	0	0	0.0164543		0	0			-85	0.862941	0.965872	0.993412	0.959507	0.835893	1.10859	0.937363	0.994713					-42.91	-40.3	-5.72	-2.54
-70	0	0	0	0	0	0	0	0	0		-4.49397	0	0			-70	0	0	0	0	0	0	0	0	0	0.0568418		0	0			-80	0.960921	0.972508	0.968433	0.984281	0.872298	1.10741	0.997363	0.950183					-13.01	-14.25	-11.67	-4.66
-65	0	0	0	0	-1.04	0	0	0	0	0.721031	3.9825	0	0			-65	0	0	0	0	0.013968	0	0	0	0	-0.0523874	-0.0087491	0	0			-75	0.903153	0.979686	1	1	1	1.01809	0.971429	1					-8.7	-7.49	-17.86	-8.14
-60	-2.18	-0.41	-0.71	-0.39	-4.18	0	-1.54	0	0	2.72166	0.208005	-0.41	-1.72			-60	0.0173302	0.00940121	0.00657018	0.00326524	0.0584798	0	0.0271749	0	0	-0.0028502	-0.0344011	0.00593171	0.0224145			-70	0.857089	0.960997	0.980511	0.992455	0.904721	0.878574	1	0.933103					-13.95	-13.75	-22.65	-7.19
-55	-8.28	-4.93	-2.42	-0.77	-3.34	-0.88	-5.07	-2.53	-2.11	-12.2959	-2.37739	-0.75	-0.23			-55	0.0686848	0.117959	0.0233678	0.00672705	0.0487595	0.00857098	0.0933551	0.0228601	0.0505218	0.0339925	0.162174	0.0113225	0.00312761			-65	0.961299	1	0.89322	0.943662	0.829067	0.844121	0.939121	0.921106					-27.13	-18.89	-15.88	-5.12
-50	-8.41	-4.7	-7.26	-2.73	-7.3	-3.29	-9.97	-7.67	-7.65	-1.68101	-9.25609	-1.68	-1.35			-50	0.0729343	0.117567	0.0732899	0.0249345	0.111414	0.0335003	0.191925	0.0724533	0.191497	0.138362	0.023179	0.0265152	0.0191921			-60	0.886162	0.938245	0.917925	0.925931	0.76934	0.83128	0.925055	0.931883							-12.44	-4.93
-45	-16.39	-6.72	-12.93	-10.09	-16.15	-5.76	-14.74	-12.53	-10.39	-3.31976	-11.181	-6.93	-3.74			-45	0.148908	0.176101	0.136744	0.0965458	0.258223	0.0614439	0.29726	0.123999	0.272471	0.175095	0.0479554	0.114583	0.0557012			-55	1	0.881771	0.768872	0.861922	0.451081	0.810862	0.887253	0.912159
-40	-32.05	-12.38	-19.6	-16.86	-43.95	-11.99	-23.38	-27.15	-15.91	-7.61407	-12.9202	-16.67	-7.48			-40	0.305743	0.340645	0.217649	0.16939	0.737853	0.134297	0.495077	0.282115	0.438091	0.212447	0.115488	0.28941	0.116972			-50	0.807816	0.860103	0.792753	0.807596	0.349545	0.781672	0.968571	0.928833
-35	-74.72	-17.28	-67.59	-41.39	-54.65	-47.28	-34.14	-68.74	-21.74	-25.1433	-34.1416	-35.44	-24.34			-35	0.750311	0.500497	0.790058	0.437727	0.965779	0.557442	0.760971	0.751868	0.63013	0.590938	0.401437	0.647661	0.400663			-45	0.723617	0.843581	0.903925	0.775402	0.386803	0.591937	0.923516	0.856852
-30	-85.7	-23.18	-68.84	-68.14	-51.09	-69.73	-39.26	-79.05	-25.43	-45.839	-43.9682	-44.86	-46.05			-30	0.908378	0.708683	0.849373	0.760661	0.953025	0.867807	0.92371	0.912673	0.778033	0.803301	0.772524	0.865355	0.800146			-40	0.748914	0.796723	0.86577	0.726861	0.327361	0.607111	0.904835	0.802359
-25	-86.29	-27.11	-73.37	-69.88	-50.63	-71.5	-35.93	-79.74	-28.45	-50.6319	-47.8197	-46.08	-50.24			-25	0.968433	0.87759	0.958517	0.825972	1	0.942178	0.895089	0.974794	0.921632	0.925059	0.903493	0.941176	0.9243			-35	0.729092	0.814193	0.863025	0.625377	0.494881	0.707521	0.893626	0.746442
-20	-83.3	-25.31	-71.51	-70.9	-45.58	-70.25	-37.78	-76.99	-27.09	-52.7437	-48.6529	-41.1	-50.1			-20	0.993306	0.870529	0.992606	0.890405	0.956523	0.983563	1	1	0.932423	1	1	0.891927	0.979332			-30	0.4899	0.624323	0.757892		0.310865	0.48044	0.885495	0.710045
-15	-78.62	-22.58	-67.54	-74.65	-43.1	-66.96	-34.56	-68.57	-24.09	-48.5697	-37.0531	-41.8	-47.96			-15	1	0.828407	1	1	0.964777	1	0.975754	0.950011	0.884442	0.812352	0.982253	0.967593	1
-10	-68.06	-25.44	-60.62	-67.11	-36.68	-62.1	-31.8	-63.11	-23.47	-40.788	-32.489	-38.73	-44.44			-10	0.927518	1	0.961652	0.963209	0.879716	0.993664	0.96196	0.936819	0.923228	0.763168	0.883799	0.960565	0.992792
-5	-60.73	-22.13	-53.02	-59.98	-32.57	-56.15	-28.65	-56.71	-21.87	-37.8805	-30.6364	-37.44	-38.6																			Step voltage (mV)	G369i KI
0	-55.8	-18.43	-43.53	-51.76	-27.04	-51.6	-23.75	-49.02	-21.79	-33.1385	-34.831	-29.63	-34.19																			-90		1	0.676793	0.731125	0.566667	0.787709	1	0.891284
5	-41.61	-17.85	-36.81	-43.71	-20.43	-45.1	-21.43	-45.67	-14.99	-27.229	-27.3831	-26.83	-26.19			Step voltage (mV)	G369i KI															-85	0.968368	0.854545	1	0.855162	0.924786	1	0.863142	0.964386
10	-33.58	-16.29	-29.63	-37.68	-21.51	-40.74	-20.46	-32.25	-12.34	-20.7549	-16.4673	-20.32	-22.32			-80	0	0	0	0	0	0	0	0	0							-80	1	0.838384	0.836287	1	1	0.513966	0.860809	1
15	-17.22	-10	-25.2	-33.42	-13.69	-36.38	-14.32	-26.38	-9.08	-16.3844	-15.9123	-17.08	-18.68			-75	0	0	0	0	0	0	0	0	0							-75	0.84184	0.765657	0.857384	0.784284	0.982906	0.50838	0.926128	0.856607
20	-14.92	-10.92	-12.04	-23.87	-13.92	-28.59	-11.67	-22.82	-2.25	-12.9457	-14.9463	-10.02	-9.26			-70	0	0	0	0	0	0	0	0	0							-70	0.786485	0.325253	0.956962	0.734206	0.775214	0.536313	0.870918	0.761012
25	2.36	-5.42	-10.19	-22.21	-8.91	-22.92	-8.7	-14.48	3.62	-6.78017	-9.04189	-10.37	-3.7			-65	0	0.0411785	0.0572996	0.0566885	0	0	0.018789	0.0398131	0.118553							-65	0.537024	0.286869	0.713924	0.613251	0.752137	0.659218	0.768274	0.743205
30	8.07	-2.75	-4.5	-10.22	-9.45	-19.33	-7.69	-12.56	3.42	0.0579059	-2.90799	-6.18	-3.53			-60	0.101676	-0.097487	0.0843003	0.0830601	0.0182208	0.0197368	0.168807	-0.0140187	0.0582511							-60	0.395399	0.0828283	0.324051	0.352851	0.252137	0.379888	0.566874	0.691659
35	19.89		7.8	-8.68	5.76	-16.37	-5.18	-5.62	10.38	6.69789	8.1716	-3.12	6.81			-55	0.24431	0.16683	0.173363	0.170634	0.0796169	0.0979821	0.230395	0.0774076	0.136156							-55	-0.0438533	0.0424242	0.346835	0.327427	-0.0863248	0.100559	0.360031	0.166823
40	31.7		12.97	11.08	7.53	-11.09	-3.83	5.71	16.96	12.4991	4.0397	5.46	13.45			-50	0.379525	0.384276	0.435654	0.199627	0.375183	0.264245	0.615847	0.284197	0.127093							-50	-0.0395399	0.0222222	-0.0067511	0.03698	-0.0282051	-0.0837989	0.0155521	0.0468604
																-45	0.859891	0.415945	0.624473	0.54879	0.583716	0.555024	0.768196	0.544059	0.552109							-45	-0.007908	-0.0989899	-0.0438819	-0.069	0.0299145	-0.106145	-0.0894246	0.126523
																-40	0.885738	0.606759	0.748734	0.818402	0.786455	0.712679	0.882202	0.663785	0.737226							-40	-0.0287563	-0.0888889	0.0455696	-0.0993837	-0.0837607	0.0335196	-0.0396579	0.163074
																-35	0.879594	0.814376	0.949034	1	0.860932	0.78343	0.927861	0.810133	0.976166							-35	0.00718907	-0.09	-0.0244726	-0.207242	-0.0598291	-0.0949721	-0.007776	-0.206186
step voltage (mV)	G369i KI															-30	1.10067	1	0.984529	0.992395	0.956592	1	0.906014	1	0.812926							-30	-0.0316319	-0.0323232	0.0185654	-0.0107858	-0.0529915	0.0782123	-0.0497667	-0.031865
-80	0	0	0	0	0	0	0	0	0							-25	0.900829	0.972576	0.924299	1.15796	1	0.872221	0.952402	0.984607	1
-75	0	0	0	0	0	0	0	0	0							-20	1	0.789645	0.970069	0.988934	0.865203	0.890849	1	0.916472	0.918037
-70	0	0	0	0	0	0	0	0	0							-15	0.904864	0.82565	0.921519	0.806721	0.754341	0.882297	0.860183	0.898131	0.810234							Step voltage (mV)	CaV1.4 KO
-65	0	-0.33	-0.97	-0.91	0	0	-0.32	-0.71	-1.59							-10	0.904487	0.949245	1	0.859895	0.646187	0.912509	0.790564	0.666889	0.825501							-90	0.909171	0.83	1
-60	-1.85	0.75	-1.37	-1.28	-0.32	-0.33	-2.76	0.24	-0.75																							-85	1	1	0.881139
-55	-4.26	-1.23	-2.7	-2.52	-1.34	-1.57	-3.61	-1.27	-1.68																							-80	0.850088	0.827333	0.941637
-50	-6.33	-2.71	-6.49	-2.82	-6.04	-4.05	-9.23	-4.46	-1.5							Step voltage (mV)	CaV1.4 KO															-75	0.901235	0.931333	0.972954
-45	-13.69	-2.8	-8.88	-7.4	-8.97	-8.12	-10.99	-8.15	-6.22							-80	0	0	0													-70	0.824515	0.826	0.906406
-40	-13.43	-3.89	-10.14	-10.51	-11.51	-9.93	-12.02	-9.47	-7.91							-75	0	0	0													-65	0.768959	0.630667	0.934164
-35	-12.67	-4.96	-12.21	-12.2	-11.97	-10.37	-12.01	-10.98	-9.95							-70	0	0	0													-60	0.610229	0.381333	0.901779
-30	-15.02	-5.77	-12	-11.47	-12.6	-12.54	-11.11	-12.84	-7.85							-65	0	0.11957	0													-55	0.343915	0.188	0.256939
-25	-11.61	-5.3	-10.64	-12.64	-12.44	-10.33	-11.03	-11.94	-9.12							-60	0.103499	0.248656	0.00564516													-50	0.187831	0.0213333	0.162989
-20	-12.13	-4.05	-10.51	-10.16	-10.13	-9.93	-10.9	-10.46	-7.88							-55	0.0737736	0.215054	0.0510519													-45	0.015873	-0.016	0.143772
-15	-10.29	-3.97	-9.36	-7.77	-8.28	-9.22	-8.79	-9.61	-6.52							-50	0.231381	0.360704	0.209384													-40	0.00617284	0.102	0.0320285
-10	-9.6	-4.26	-9.48	-7.73	-6.62	-8.9	-7.54	-6.66	-6.2							-45	0.497293	0.62212	0.415975													-35	-0.0529101	-0.0233333	0.0274021
-5	-6.8	-3.76	-7.72	-5.58	-4.62	-6.36	-4.15	-7.18	-3.4							-40	0.625364	0.819892	0.590323													-30	-0.0167549	0.11	0.0298932
0	-6.05	-1.82	-5.45	-5.18	-2.79	-3.66	-2.73	-6.2	-1.57							-35	0.872794	1	0.755178
5	-4.75	-0.5	-4.25	-1.49	-1.27	-1.71	-0.28	-3.95	-2.48							-30	1	0.935484	0.905735
10	-1.69	-0.58	-2.8	-0.81	3.49	0.04	0.11	-3.06	2.5							-25	0.995027	0.782416	0.906262
15	-1.86	0.19	-1.17	0.23	6.38	1.05	2.85	0.19	5.3							-20	0.946793	0.744624	1
20	1.1	1.43	-0.74	1.31	10.65	3.04	5.44	0.04	5.95							-15	0.908455	0.58638	0.969462
25	1.27	1.72	0.17	2.84	14.55	5.57	7.83	2.88	9.06							-10	0.758434	0.627496	0.857604
30	2.75	2.12	2.16	4.31	20.15	8.17	9.53	4.28	9.8
35	4.95	3.94	4.74	5.56	24.63	5.25	11.39	6.36	13.65
40	4.88	4.79	5.5	3.85	24.75	4.23	15.05	5.88	15.86
step voltage (mV)	CaV1.4 KO
-80	0	0	0
-75	0	0	0
-70	0	0	0
-65	0	-2.78	0
-60	-1.42	-5.55	-0.21
-55	-0.97	-4.6	-1.82
-50	-2.91	-7.38	-7.14
-45	-5.97	-12.15	-13.54
-40	-7.15	-15.25	-18.3
-35	-9.48	-17.67	-22.24
-30	-10.29	-15.66	-25.27
-25	-9.67	-12.37	-23.88
-20	-8.66	-11.08	-24.8
-15	-7.79	-8.18	-22.54
-10	-6.07	-8.17	-18.61
-5	-5.54	-7.11	-18.61
0	-5.6	-7.73	-16.19
5	-3.61	-5.25	-14.32
10	-1.84	-4.15	-14.13
15	-1.61	-2.22	-10.08
20	-0.78	-0.98	-7.78
25	-0.19	-0.55	-4.18
30	-0.003	-0.86	-4.55
35	1.02	-0.35	-2.49
40	0.66	1.62	-2.37
[truncated: 2 more columns]
