# Supplementary material for: A non-conducting role of the Cav1.4 Ca2+ channel drives homeostatic plasticity at the cone photoreceptor synapse
Source: eLife. 2024 Nov 12;13:RP94908. doi: 10.7554/eLife.94908 (PMC11556788; doi:10.7554/eLife.94908)
Supplement: Figure 3—figure supplement 1—source data 1. [file elife-94908-fig3-figsupp1-data1.xlsx]

## Sheet: Fig.S2a
Supplementary Figure S2
Supplementary Figure S2 a
CaV1.4 + β2x13 + α2δ-4
Time (ms)	Vehicle	5 µM ML218
0	-3.00964	2.05797
0.01	-2.98628	2.01874
0.02	-2.97258	1.97732
0.03	-2.9676	1.93248
0.04	-2.97289	1.88421
0.05	-2.98535	1.84186
0.06	-3.00466	1.80512
0.07	-3.02895	1.77616
0.08	-3.05324	1.75529
0.09	-3.07628	1.74564
0.1	-3.09278	1.75062
0.11	-3.09932	1.77366
0.12	-3.09901	1.81383
0.13	-3.09309	1.87082
0.14	-3.08188	1.94431
0.15	-3.06881	2.03368
0.16	-3.05417	2.13364
0.17	-3.0386	2.24076
0.18	-3.02023	2.34695
0.19	-3.00217	2.45033
0.2	-2.98255	2.54407
0.21	-2.96013	2.62472
0.22	-2.93054	2.68793
0.23	-2.89131	2.73589
0.24	-2.83961	2.76952
0.25	-2.77266	2.78914
0.26	-2.6917	2.80066
0.27	-2.5961	2.80938
0.28	-2.48742	2.8209
0.29	-2.36629	2.83709
0.3	-2.23675	2.86045
0.31	-2.10004	2.89221
0.32	-1.95929	2.93145
0.33	-1.81667	2.97162
0.34	-1.67374	3.00743
0.35	-1.53392	3.03452
0.36	-1.40064	3.05133
0.37	-1.27608	3.05819
0.38	-1.15899	3.05009
0.39	-1.05499	3.02518
0.4	-0.96437	2.98438
0.41	-0.886209	2.9274
0.42	-0.820193	2.8536
0.43	-0.767566	2.76111
0.44	-0.724593	2.65243
0.45	-0.690339	2.53286
0.46	-0.661068	2.4111
0.47	-0.631796	2.29059
0.48	-0.600345	2.17755
0.49	-0.562354	2.0751
0.5	-0.51471	1.98915
0.51	-0.458347	1.91878
0.52	-0.396378	1.84996
0.53	-0.335033	1.78052
0.54	-0.276801	1.71574
0.55	-0.23196	1.65876
0.56	-0.206114	1.60644
0.57	-0.20985	1.55444
0.58	-0.248152	1.50057
0.59	-0.320708	1.44576
0.6	-0.42565	1.3922
0.61	-0.555815	1.33864
0.62	-0.703729	1.28228
0.63	-0.850398	1.22747
0.64	-0.983989	1.17827
0.65	-1.09672	1.13031
0.66	-1.18266	1.0836
0.67	-1.23934	1.04157
0.68	-1.27266	1.00856
0.69	-1.28418	0.986448
0.7	-1.2767	0.970255
0.71	-1.25615	0.959356
0.72	-1.22999	0.954374
0.73	-1.20446	0.954062
0.74	-1.18515	0.954374
0.75	-1.17363	0.948457
0.76	-1.17737	0.932887
0.77	-1.19449	0.911089
0.78	-1.22377	0.882129
0.79	-1.26207	0.851612
0.8	-1.3066	0.818915
0.81	-1.35082	0.791512
0.82	-1.39005	0.772828
0.83	-1.42368	0.765978
0.84	-1.44953	0.771271
0.85	-1.4707	0.789021
0.86	-1.48441	0.823898
0.87	-1.49032	0.874344
0.88	-1.4841	0.939738
0.89	-1.47039	1.02039
0.9	-1.4461	1.11506
0.91	-1.41465	1.21782
0.92	-1.37915	1.32307
0.93	-1.34397	1.41898
0.94	-1.30971	1.50555
0.95	-1.28387	1.58153
0.96	-1.26798	1.64163
0.97	-1.26207	1.68429
0.98	-1.26923	1.71294
0.99	-1.29009	1.73069
1	-1.32528	1.74315
1.01	-1.37293	1.75218
1.02	-1.4296	1.75841
1.03	-1.49437	1.76245
1.04	-1.55852	1.76059
1.05	-1.62236	1.74377
1.06	-1.67997	1.71014
1.07	-1.72636	1.65938
1.08	-1.76186	1.59368
1.09	-1.78273	1.50929
1.1	-1.79082	1.40653
1.11	-1.7821	1.28695
1.12	-1.75096	1.15305
1.13	-1.6918	1.00762
1.14	-1.60212	0.852235
1.15	-1.4816	0.686571
1.16	-1.33182	0.51717
1.17	-1.15744	0.349637
1.18	-0.964059	0.189267
1.19	-0.753242	0.0382382
1.2	-0.534329	-0.0981546
1.21	-0.314792	-0.217109
1.22	-0.107401	-0.313643
1.23	0.0809959	-0.393672
1.24	0.238564	-0.455018
1.25	0.360944	-0.501416
1.26	0.443776	-0.54003
1.27	0.487683	-0.578332
1.28	0.492977	-0.623173
1.29	0.460281	-0.67362
1.3	0.398001	-0.735277
1.31	0.304892	-0.810947
1.32	0.185938	-0.901564
1.33	0.0426943	-1.00308
1.34	-0.119545	-1.10896
1.35	-0.296108	-1.21234
1.36	-0.478899	-1.3095
1.37	-0.662002	-1.40043
1.38	-0.839811	-1.47796
1.39	-1.00703	-1.53931
1.4	-1.15837	-1.58633
1.41	-1.29196	-1.61622
1.42	-1.40718	-1.62744
1.43	-1.50153	-1.61218
1.44	-1.57378	-1.57419
1.45	-1.62391	-1.5172
1.46	-1.65287	-1.44838
1.47	-1.66502	-1.37022
1.48	-1.66097	-1.28988
1.49	-1.64571	-1.21421
1.5	-1.62391	-1.15255
1.51	-1.59744	-1.10927
1.52	-1.56942	-1.08124
1.53	-1.5389	-1.0719
1.54	-1.50807	-1.08436
1.55	-1.47724	-1.11581
1.56	-1.44206	-1.15722
1.57	-1.3941	-1.20238
1.58	-1.33058	-1.24753
1.59	-1.24992	-1.28832
1.6	-1.15152	-1.32289
1.61	-1.03661	-1.34655
1.62	-0.909253	-1.35122
1.63	-0.777219	-1.34406
1.64	-0.648611	-1.32444
1.65	-0.531214	-1.2905
1.66	-0.426584	-1.23725
1.67	-0.34095	-1.17186
1.68	-0.27867	-1.10148
1.69	-0.241302	-1.02924
1.7	-0.227289	-0.956681
1.71	-0.237565	-0.885994
1.72	-0.266526	-0.824648
1.73	-0.309499	-0.776693
1.74	-0.359634	-0.744307
1.75	-0.414129	-0.722821
1.76	-0.463952	-0.718461
1.77	-0.505368	-0.732786
1.78	-0.537754	-0.768285
1.79	-0.555815	-0.822157
1.8	-0.55924	-0.887862
1.81	-0.546473	-0.966958
1.82	-0.523741	-1.05975
1.83	-0.488864	-1.15785
1.84	-0.444957	-1.25874
1.85	-0.395444	-1.35745
1.86	-0.343441	-1.4543
1.87	-0.291437	-1.54865
1.88	-0.242547	-1.63615
1.89	-0.202688	-1.71961
1.9	-0.176842	-1.80306
1.91	-0.164075	-1.88403
1.92	-0.168746	-1.96468
1.93	-0.186495	-2.03755
1.94	-0.216701	-2.10886
1.95	-0.249709	-2.17674
1.96	-0.277735	-2.23653
1.97	-0.298599	-2.28386
1.98	-0.299533	-2.31469
1.99	-0.273064	-2.32933
2	-0.216389	-2.32933
2.01	-0.125461	-2.315
2.02	-0.00214728	-2.28916
2.03	0.150127	-2.25553
2.04	0.326067	-2.21318
2.05	0.517266	-2.16429
2.06	0.716561	-2.10605
2.07	0.910251	-2.03942
2.08	1.0946	-1.9706
2.09	1.26026	-1.89804
2.1	1.40102	-1.82486
2.11	1.50596	-1.75386
2.12	1.56917	-1.68349
2.13	1.57976	-1.61996
2.14	1.53492	-1.56266
2.15	1.43589	-1.50973
2.16	1.28642	-1.46146
2.17	1.09429	-1.42067
2.18	0.866344	-1.38641
2.19	0.6138	-1.35932
2.2	0.348799	-1.33192
2.21	0.0822418	-1.30825
2.22	-0.174974	-1.28894
2.23	-0.413506	-1.27369
2.24	-0.623077	-1.25998
2.25	-0.79746	-1.24753
2.26	-0.931673	-1.23974
2.27	-1.02447	-1.23414
2.28	-1.07616	-1.2332
2.29	-1.08332	-1.24068
2.3	-1.05436	-1.25313
2.31	-0.98866	-1.27182
2.32	-0.891503	-1.2933
2.33	-0.766632	-1.31137
2.34	-0.624946	-1.32413
2.35	-0.475474	-1.33441
2.36	-0.328805	-1.34095
2.37	-0.194592	-1.34033
2.38	-0.079063	-1.33503
2.39	0.0187163	-1.32787
2.4	0.0984344	-1.31728
2.41	0.166008	-1.30825
2.42	0.229533	-1.30296
2.43	0.296796	-1.30919
2.44	0.369351	-1.32943
2.45	0.454364	-1.36991
2.46	0.554634	-1.42939
2.47	0.668295	-1.50692
2.48	0.792854	-1.6019
2.49	0.921151	-1.71151
2.5	1.04851	-1.82704
2.51	1.17276	-1.93541
2.52	1.29234	-2.03475
2.53	1.40475	-2.11664
2.54	1.51374	-2.17861
2.55	1.62149	-2.21536
2.56	1.7311	-2.22532
2.57	1.84476	-2.21069
2.58	1.96434	-2.17737
2.59	2.09014	-2.12661
2.6	2.22062	-2.05903
2.61	2.35234	-1.98274
2.62	2.48375	-1.90365
2.63	2.60893	-1.82922
2.64	2.72508	-1.76009
2.65	2.83096	-1.70186
2.66	2.92594	-1.66231
2.67	3.0097	-1.63771
2.68	3.08631	-1.63242
2.69	3.15606	-1.63865
2.7	3.21585	-1.64986
2.71	3.27252	-1.66698
2.72	3.32048	-1.68473
2.73	3.36221	-1.70124
2.74	3.39054	-1.70809
2.75	3.40611	-1.70871
2.76	3.40207	-1.7003
2.77	3.37653	-1.68006
2.78	3.32608	-1.64643
2.79	3.24917	-1.60003
2.8	3.14454	-1.54211
2.81	3.01126	-1.47423
2.82	2.85151	-1.39295
2.83	2.6681	-1.30047
2.84	2.46226	-1.1977
2.85	2.24584	-1.09089
2.86	2.02257	-0.984708
2.87	1.8021	-0.877275
2.88	1.58474	-0.772334
2.89	1.38451	-0.668326
2.9	1.20546	-0.567121
2.91	1.051	-0.47339
2.92	0.928002	-0.385264
2.93	0.837385	-0.309906
2.94	0.777284	-0.242021
2.95	0.741785	-0.184723
2.96	0.724346	-0.137079
2.97	0.716562	-0.102826
2.98	0.700992	-0.0841416
2.99	0.669852	-0.078225
3	0.612554	-0.0822732
3.01	0.524117	-0.092238
3.02	0.404229	-0.100023
3.03	0.258493	-0.105317
3.04	0.0915833	-0.103448
3.05	-0.0828001	-0.0941063
3.06	-0.259986	-0.078225
3.07	-0.428141	-0.0592297
3.08	-0.582595	-0.035252
3.09	-0.718677	-0.0112743
3.1	-0.831714	0.0142602
3.11	-0.919529	0.0401064
3.12	-0.974335	0.0609701
3.13	-0.989594	0.0815224
3.14	-0.961568	0.101141
3.15	-0.886832	0.117645
3.16	-0.768812	0.129166
3.17	-0.61249	0.134772
3.18	-0.424405	0.139443
3.19	-0.217636	0.144114
3.2	-0.00183637	0.141934
3.21	0.214586	0.131969
3.22	0.422601	0.115154
3.23	0.613177	0.0949126
3.24	0.778841	0.0640842
3.25	0.911809	0.0251593
3.26	1.0155	-0.0178138
3.27	1.08931	-0.0626553
3.28	1.13913	-0.102514
3.29	1.16466	-0.134588
3.3	1.17276	-0.157632
3.31	1.16404	-0.162614
3.32	1.14473	-0.148913
3.33	1.12169	-0.116839
3.34	1.10301	-0.0667033
3.35	1.09678	0.000247598
3.36	1.10892	0.0830796
3.37	1.14349	0.179925
3.38	1.19892	0.288914
3.39	1.26929	0.405378
3.4	1.34777	0.533674
3.41	1.42032	0.671624
3.42	1.47513	0.819227
3.43	1.49786	0.973992
3.44	1.47731	1.1353
3.45	1.40506	1.3075
3.46	1.27521	1.48873
3.47	1.08868	1.67744
3.48	0.850463	1.87113
3.49	0.573006	2.07292
3.5	0.267836	2.27657
3.51	-0.0550853	2.4768
3.52	-0.382989	2.66613
3.53	-0.707778	2.83958
3.54	-1.02104	2.99466
3.55	-1.31687	3.12607
3.56	-1.59682	3.22914
3.57	-1.85497	3.3017
3.58	-2.09163	3.34716
3.59	-2.30525	3.36118
3.6	-2.49801	3.34623
3.61	-2.6671	3.30357
3.62	-2.81315	3.23195
3.63	-2.93739	3.14289
3.64	-3.04202	3.03545
3.65	-3.12922	2.91837
3.66	-3.20084	2.79474
3.67	-3.25876	2.66489
3.68	-3.30578	2.54251
3.69	-3.3447	2.42573
3.7	-3.37242	2.31238
3.71	-3.39235	2.20153
3.72	-3.40138	2.09627
3.73	-3.402	2.00317
3.74	-3.38674	1.91815
3.75	-3.35342	1.8403
3.76	-3.29301	1.76619
3.77	-3.20457	1.69177
3.78	-3.08344	1.61796
3.79	-2.93397	1.53887
3.8	-2.75678	1.4523
3.81	-2.55313	1.36106
3.82	-2.32861	1.26702
3.83	-2.08603	1.17017
3.84	-1.83224	1.07146
3.85	-1.57471	0.975549
3.86	-1.32186	0.893339
3.87	-1.07803	0.825455
3.88	-0.846039	0.769714
3.89	-0.631485	0.72425
3.9	-0.430632	0.691865
3.91	-0.244727	0.674738
3.92	-0.0731466	0.671624
3.93	0.082553	0.678786
3.94	0.225485	0.692488
3.95	0.358764	0.716154
3.96	0.482701	0.747294
3.97	0.604769	0.783728
3.98	0.727149	0.813933
3.99	0.851709	0.834797
4	0.982185	0.847876
4.01	1.11827	0.847253
4.02	1.25777	0.828569
4.03	1.39821	0.794627
4.04	1.53616	0.749473
4.05	1.66602	0.699027
4.06	1.78653	0.641107
4.07	1.89458	0.57509
4.08	1.98582	0.502223
4.09	2.05869	0.424996
4.1	2.11132	0.342786
4.11	2.14401	0.251235
4.12	2.15242	0.150653
4.13	2.13405	0.0454005
4.14	2.08641	-0.0629662
4.15	2.00638	-0.171956
4.16	1.8977	-0.281257
4.17	1.75913	-0.388067
4.18	1.59564	-0.490206
4.19	1.4169	-0.58674
4.2	1.23162	-0.677045
4.21	1.04758	-0.760812
4.22	0.880669	-0.83399
4.23	0.736491	-0.892533
4.24	0.626878	-0.93177
4.25	0.556191	-0.951699
4.26	0.519757	-0.946717
4.27	0.511972	-0.917445
4.28	0.524739	-0.860771
4.29	0.547472	-0.781053
4.3	0.573007	-0.684208
4.31	0.596673	-0.580823
4.32	0.608818	-0.47557
4.33	0.602901	-0.378725
4.34	0.576743	-0.298384
4.35	0.528165	-0.23517
4.36	0.457789	-0.191574
4.37	0.371843	-0.166974
4.38	0.274064	-0.167285
4.39	0.175661	-0.185035
4.4	0.0813077	-0.225828
4.41	-0.00090177	-0.282503
4.42	-0.0659842	-0.351945
4.43	-0.10958	-0.432909
4.44	-0.128575	-0.516986
4.45	-0.12515	-0.599507
4.46	-0.101172	-0.680782
4.47	-0.0585107	-0.760812
4.48	-0.00494986	-0.838039
4.49	0.0545274	-0.914643
4.5	0.113693	-0.989379
4.51	0.16881	-1.06629
4.52	0.212095	-1.14788
4.53	0.24666	-1.23102
4.54	0.26659	-1.31168
4.55	0.274686	-1.39326
4.56	0.277178	-1.47734
4.57	0.273752	-1.55768
4.58	0.264099	-1.63148
4.59	0.250086	-1.68878
4.6	0.234205	-1.73051
4.61	0.216144	-1.75044
4.62	0.19746	-1.74546
4.63	0.17971	-1.71463
4.64	0.167254	-1.65795
4.65	0.157289	-1.5801
4.66	0.142965	-1.4817
4.67	0.123658	-1.35963
4.68	0.0965656	-1.21919
4.69	0.058575	-1.06505
4.7	0.00688288	-0.903121
4.71	-0.0603793	-0.731229
4.72	-0.14072	-0.551863
4.73	-0.233206	-0.373743
4.74	-0.333476	-0.197802
4.75	-0.444957	-0.0255985
4.76	-0.564222	0.148474
4.77	-0.689094	0.322857
4.78	-0.819881	0.490078
4.79	-0.951603	0.647646
4.8	-1.08239	0.789956
4.81	-1.21038	0.912647
4.82	-1.33213	1.00887
4.83	-1.44828	1.07208
4.84	-1.55354	1.10198
4.85	-1.6482	1.10073
4.86	-1.72574	1.06274
4.87	-1.78615	0.987382
4.88	-1.83193	0.878081
4.89	-1.86898	0.741689
4.9	-1.90168	0.581941
4.91	-1.93749	0.402887
4.92	-1.98389	0.204525
4.93	-2.04212	-0.000997969
4.94	-2.11343	-0.206833
4.95	-2.19907	-0.407062
4.96	-2.2956	-0.601064
4.97	-2.4021	-0.779807
4.98	-2.50766	-0.932081
4.99	-2.60856	-1.05135
5	-2.69762	-1.13854
5.01	-2.77048	-1.19054
5.02	-2.82716	-1.21483
5.03	-2.86982	-1.20829
5.04	-2.8994	-1.18151
5.05	-2.9184	-1.14072
5.06	-2.92867	-1.09089
5.07	-2.93303	-1.0336
5.08	-2.93023	-0.973808
5.09	-2.9156	-0.913086
5.1	-2.89037	-0.854543
5.11	-2.85145	-0.800671
5.12	-2.79477	-0.747422
5.13	-2.71817	-0.698843
5.14	-2.61696	-0.655247
5.15	-2.49178	-0.616011
5.16	-2.34324	-0.577398
5.17	-2.17291	-0.538784
5.18	-1.98887	-0.499859
5.19	-1.8011	-0.461869
5.2	-1.62204	-0.424501
5.21	-1.46261	-0.378414
5.22	-1.34085	-0.328278
5.23	-1.26518	-0.276898
5.24	-1.24681	-0.228631
5.25	-1.28542	-0.182233
5.26	-1.37635	-0.139882
5.27	-1.50683	-0.102514
5.28	-1.66844	-0.0776024
5.29	-1.84314	-0.066392
5.3	-2.0197	-0.0660807
5.31	-2.18723	-0.0716859
5.32	-2.33639	-0.0847645
5.33	-2.46095	-0.10158
5.34	-2.55998	-0.120264
5.35	-2.63253	-0.138636
5.36	-2.67738	-0.156075
5.37	-2.70322	-0.173824
5.38	-2.71132	-0.186592
5.39	-2.71101	-0.192508
5.4	-2.7082	-0.185346
5.41	-2.70415	-0.165417
5.42	-2.70353	-0.135211
5.43	-2.70322	-0.0869439
5.44	-2.70229	-0.0243528
5.45	-2.69388	0.0516286
5.46	-2.678	0.132592
5.47	-2.64873	0.213245
5.48	-2.60264	0.287046
5.49	-2.54067	0.350572
5.5	-2.4594	0.395413
5.51	-2.3585	0.421259
5.52	-2.23675	0.428733
5.53	-2.09911	0.419079
5.54	-1.9431	0.393233
5.55	-1.77121	0.353997
5.56	-1.58561	0.305107
5.57	-1.38943	0.24563
5.58	-1.18142	0.18335
5.59	-0.967173	0.115154
5.6	-0.744211	0.0413523
5.61	-0.513153	-0.0396115
5.62	-0.276179	-0.127115
5.63	-0.0317306	-0.218977
5.64	0.212718	-0.313643
5.65	0.457166	-0.414224
5.66	0.700057	-0.520412
5.67	0.935786	-0.633449
5.68	1.15657	-0.755829
5.69	1.35991	-0.891288
5.7	1.54146	-1.03765
5.71	1.69903	-1.19615
5.72	1.83137	-1.36773
5.73	1.94098	-1.5499
5.74	2.02817	-1.74265
5.75	2.0998	-1.93634
5.76	2.1546	-2.12256
5.77	2.19851	-2.29507
5.78	2.22934	-2.44704
5.79	2.25082	-2.56911
5.8	2.26266	-2.65225
5.81	2.26421	-2.70052
5.82	2.25736	-2.71609
5.83	2.24055	-2.69896
5.84	2.21252	-2.65287
5.85	2.16986	-2.58436
5.86	2.10634	-2.49281
5.87	2.0207	-2.38725
5.88	1.91514	-2.26985
5.89	1.79898	-2.14778
5.9	1.67567	-2.02073
5.91	1.55734	-1.89742
5.92	1.45676	-1.77722
5.93	1.37735	-1.66387
5.94	1.32223	-1.56017
5.95	1.29203	-1.46613
5.96	1.28424	-1.3805
5.97	1.29919	-1.31043
5.98	1.32971	-1.25344
5.99	1.37019	-1.2139
6	1.41534	-1.19303
6.01	1.46018	-1.18899
6.02	1.50129	-1.19646
6.03	1.54021	-1.21327
6.04	1.57042	-1.2357
6.05	1.59346	-1.25998
6.06	1.60934	-1.2768
6.07	1.62149	-1.28116
6.08	1.63145	-1.26839
6.09	1.63675	-1.23787
6.1	1.64391	-1.18899
6.11	1.65076	-1.12235
6.12	1.65636	-1.04138
6.13	1.6573	-0.949519
6.14	1.65045	-0.852051
6.15	1.63675	-0.752715
6.16	1.61277	-0.657116
6.17	1.58723	-0.571481
6.18	1.56793	-0.501416
6.19	1.55983	-0.444742
6.2	1.57229	-0.403637
6.21	1.61183	-0.381216
6.22	1.68595	-0.3753
6.23	1.79618	-0.381217
6.24	1.94628	-0.397721
6.25	2.13062	-0.421075
6.26	2.34082	-0.449724
6.27	2.56378	-0.480864
6.28	2.78892	-0.510758
6.29	3.0013	-0.536916
6.3	3.19249	-0.559959
6.31	3.35505	-0.581134
6.32	3.48739	-0.597639
6.33	3.58828	-0.611652
6.34	3.66271	-0.623173
6.35	3.71097	-0.636564
6.36	3.73838	-0.654002
6.37	3.75239	-0.679225
6.38	3.75613	-0.710054
6.39	3.75706	-0.754273
6.4	3.76267	-0.817175
6.41	3.77325	-0.897205
6.42	3.79318	-0.994361
6.43	3.81996	-1.10989
6.44	3.85297	-1.24317
6.45	3.88505	-1.39607
6.46	3.91774	-1.55488
6.47	3.94234	-1.71182
6.48	3.95511	-1.86098
6.49	3.95823	-1.99707
6.5	3.94608	-2.11135
6.51	3.9221	-2.2001
6.52	3.88162	-2.25428
6.53	3.82837	-2.27857
6.54	3.75862	-2.27546
6.55	3.67205	-2.24089
6.56	3.56244	-2.17705
6.57	3.42729	-2.08799
6.58	3.26723	-1.98305
6.59	3.08288	-1.86534
6.6	2.87175	-1.73643
6.61	2.63571	-1.60377
6.62	2.37788	-1.46551
6.63	2.10073	-1.33285
6.64	1.81424	-1.20549
6.65	1.52402	-1.08155
6.66	1.24158	-0.961353
6.67	0.974088	-0.846758
6.68	0.732754	-0.736522
6.69	0.522871	-0.627533
6.7	0.351913	-0.514806
6.71	0.22206	-0.393672
6.72	0.132688	-0.262573
6.73	0.0797505	-0.121821
6.74	0.0610667	0.0345016
6.75	0.0657375	0.198609
6.76	0.0915837	0.361159
6.77	0.131131	0.517793
6.78	0.182824	0.666953
6.79	0.244481	0.800232
6.8	0.314233	0.909844
6.81	0.391149	0.998281
6.82	0.470244	1.06336
6.83	0.550897	1.10852
6.84	0.631238	1.13187
6.85	0.715316	1.13343
6.86	0.807179	1.11661
6.87	0.906826	1.09046
6.88	1.0208	1.059
6.89	1.15003	1.02537
6.9	1.29483	0.989874
6.91	1.45146	0.964027
6.92	1.61619	0.951572
6.93	1.78155	0.95562
6.94	1.93974	0.981466
6.95	2.08142	1.02631
6.96	2.20349	1.0917
6.97	2.29909	1.17952
6.98	2.3676	1.28415
6.99	2.41026	1.40248
7	2.43362	1.5289
7.01	2.43766	1.6544
7.02	2.42988	1.77398
7.03	2.41151	1.8758
7.04	2.38784	1.95552
7.05	2.36075	2.00908
7.06	2.33272	2.02963
7.07	2.30345	2.01406
7.08	2.27138	1.96673
7.09	2.23743	1.89137
7.1	2.19633	1.79079
7.11	2.14806	1.67028
7.12	2.08796	1.53233
7.13	2.01821	1.38317
7.14	1.93538	1.22778
7.15	1.84102	1.07208
7.16	1.73764	0.917629
7.17	1.62491	0.771271
7.18	1.50129	0.637681
7.19	1.37143	0.518104
7.2	1.23162	0.416588
7.21	1.08246	0.330953
7.22	0.924576	0.2612
7.23	0.760157	0.202346
7.24	0.592313	0.148474
7.25	0.425404	0.0974039
7.26	0.268458	0.0422866
7.27	0.126461	-0.0227961
7.28	0.00844034	-0.100334
7.29	-0.0765717	-0.189395
7.3	-0.131378	-0.284371
7.31	-0.149128	-0.384019
7.32	-0.132935	-0.480241
7.33	-0.0834223	-0.569301
7.34	-0.00712964	-0.648708
7.35	0.0931409	-0.714102
7.36	0.20649	-0.761746
7.37	0.325756	-0.791018
7.38	0.442219	-0.805965
7.39	0.542489	-0.804408
7.4	0.622207	-0.779807
7.41	0.677325	-0.739014
7.42	0.706285	-0.684208
7.43	0.712513	-0.622551
7.44	0.698189	-0.554666
7.45	0.672654	-0.478996
7.46	0.634663	-0.400212
7.47	0.588888	-0.321739
7.48	0.540621	-0.240153
7.49	0.494222	-0.156698
7.5	0.452495	-0.0685721
7.51	0.415439	0.0214223
7.52	0.38679	0.108303
7.53	0.365303	0.193937
7.54	0.346619	0.278326
7.55	0.328558	0.353062
7.56	0.310497	0.413474
7.57	0.291191	0.459249
7.58	0.270638	0.487587
7.59	0.250709	0.496617
7.6	0.23327	0.484784
7.61	0.216766	0.458315
7.62	0.205244	0.414408
7.63	0.198705	0.362093
7.64	0.196837	0.300748
7.65	0.200262	0.234731
7.66	0.208981	0.164978
7.67	0.225174	0.0908647
7.68	0.247906	0.0142606
7.69	0.275621	-0.0620321
7.7	0.303958	-0.139571
7.71	0.328247	-0.22178
7.72	0.352847	-0.304923
7.73	0.37558	-0.38651
7.74	0.392084	-0.469342
7.75	0.40672	-0.554977
7.76	0.41575	-0.64684
7.77	0.422601	-0.745553
7.78	0.428518	-0.852051
7.79	0.430074	-0.967892
7.8	0.427583	-1.09089
7.81	0.414193	-1.21826
7.82	0.39115	-1.34375
7.83	0.358453	-1.46675
7.84	0.316725	-1.58135
7.85	0.265033	-1.68037
7.86	0.205867	-1.76663
7.87	0.138916	-1.84199
7.88	0.065426	-1.90489
7.89	-0.0167832	-1.95503
7.9	-0.110826	-1.99022
7.91	-0.215456	-2.01264
7.92	-0.338147	-2.02665
7.93	-0.471737	-2.0335
7.94	-0.612801	-2.03257
7.95	-0.751373	-2.02571
7.96	-0.880915	-2.01918
7.97	-0.993019	-2.01668
7.98	-1.08426	-2.017
7.99	-1.15059	-2.02229
8	-1.19667	-2.03443
8.01	-1.22408	-2.05405
8.02	-1.23778	-2.08519
8.03	-1.24307	-2.11913
8.04	-1.24432	-2.15432
8.05	-1.24743	-2.19013
8.06	-1.25366	-2.22408
8.07	-1.26549	-2.25677
8.08	-1.28106	-2.28947
8.09	-1.29819	-2.31968
8.1	-1.31189	-2.34832
8.11	-1.31594	-2.37386
8.12	-1.31158	-2.39348
8.13	-1.29196	-2.405
8.14	-1.26238	-2.40531
8.15	-1.2219	-2.3969
8.16	-1.17581	-2.37666
8.17	-1.12941	-2.34521
8.18	-1.08395	-2.30691
8.19	-1.04564	-2.26331
8.2	-1.01077	-2.22221
8.21	-0.976514	-2.18141
8.22	-0.939146	-2.14529
8.23	-0.893059	-2.11727
8.24	-0.834205	-2.09049
8.25	-0.762272	-2.06806
8.26	-0.681308	-2.04845
8.27	-0.593805	-2.03007
8.28	-0.507859	-2.00983
8.29	-0.431255	-1.98554
8.3	-0.366484	-1.9625
8.31	-0.319463	-1.94226
8.32	-0.288946	-1.93011
8.33	-0.280227	-1.92046
8.34	-0.286455	-1.91237
8.35	-0.301713	-1.90551
8.36	-0.31666	-1.89929
8.37	-0.326002	-1.88963
8.38	-0.3232	-1.86939
8.39	-0.296419	-1.83732
8.4	-0.249087	-1.79839
8.41	-0.179645	-1.75044
8.42	-0.0921416	-1.69283
8.43	0.0112429	-1.62276
8.44	0.12864	-1.54803
8.45	0.252577	-1.47547
8.46	0.383365	-1.4079
8.47	0.519135	-1.34718
8.48	0.655527	-1.29673
8.49	0.786003	-1.25687
8.5	0.910251	-1.23009
8.51	1.02111	-1.21296
8.52	1.12169	-1.20705
8.53	1.20857	-1.21327
8.54	1.28362	-1.22884
8.55	1.35057	-1.24877
8.56	1.41254	-1.26777
8.57	1.47015	-1.2824
8.58	1.52371	-1.29081
8.59	1.57571	-1.28926
8.6	1.62616	-1.27244
8.61	1.67598	-1.24566
8.62	1.72176	-1.2086
8.63	1.76286	-1.16719
8.64	1.79836	-1.12235
8.65	1.82794	-1.08062
8.66	1.84974	-1.04045
8.67	1.85722	-1.00651
8.68	1.85161	-0.977857
8.69	1.83168	-0.954502
8.7	1.79743	-0.938309
8.71	1.74729	-0.925542
8.72	1.67474	-0.919625
8.73	1.58069	-0.917134
8.74	1.46205	-0.921805
8.75	1.31601	-0.93177
8.76	1.14349	-0.943603
8.77	0.94326	-0.955436
8.78	0.719364	-0.966335
8.79	0.479276	-0.977234
8.8	0.227977	-0.983151
8.81	-0.0220764	-0.985642
8.82	-0.25656	-0.980659
8.83	-0.469557	-0.969138
8.84	-0.650791	-0.954191
8.85	-0.799329	-0.938932
8.86	-0.914235	-0.922739
8.87	-0.995198	-0.90063
8.88	-1.04658	-0.881634
8.89	-1.07336	-0.864508
8.9	-1.07429	-0.854854
8.91	-1.05561	-0.850495
8.92	-1.01762	-0.848938
8.93	-0.965615	-0.856722
8.94	-0.900844	-0.874161
8.95	-0.828288	-0.901875
8.96	-0.753864	-0.93644
8.97	-0.679751	-0.974743
8.98	-0.608752	-1.01647
8.99	-0.543358	-1.06069
9	-0.48139	-1.10397
9.01	-0.419733	-1.1457
9.02	-0.358076	-1.18431
9.03	-0.291748	-1.22355
9.04	-0.218569	-1.26185
9.05	-0.138228	-1.29766
9.06	-0.0544621	-1.326
9.07	0.026813	-1.34437
9.08	0.0943868	-1.35154
9.09	0.138917	-1.34531
9.1	0.151996	-1.32102
9.11	0.126149	-1.28272
9.12	0.0651153	-1.22635
9.13	-0.0335985	-1.1566
9.14	-0.158158	-1.07314
9.15	-0.302647	-0.981905
9.16	-0.455233	-0.890042
9.17	-0.611244	-0.802539
9.18	-0.760715	-0.720641
9.19	-0.896174	-0.649954
9.2	-1.01388	-0.589231
9.21	-1.1154	-0.54003
9.22	-1.20166	-0.492386
9.23	-1.2767	-0.441316
9.24	-1.34801	-0.388067
9.25	-1.4215	-0.327344
9.26	-1.49935	-0.256657
9.27	-1.58281	-0.170088
9.28	-1.66844	-0.0744882
9.29	-1.75906	0.0267164
9.3	-1.84532	0.130101
9.31	-1.92659	0.237845
9.32	-2.00289	0.346212
9.33	-2.06703	0.448351
9.34	-2.12527	0.541147
9.35	-2.17696	0.623357
9.36	-2.22554	0.694045
9.37	-2.271	0.749785
9.38	-2.31895	0.783416
9.39	-2.37065	0.798052
9.4	-2.42452	0.793692
9.41	-2.48182	0.772829
9.42	-2.53787	0.739509
9.43	-2.5961	0.691865
9.44	-2.65869	0.634567
9.45	-2.72595	0.572599
9.46	-2.79882	0.504402
9.47	-2.8748	0.429978
9.48	-2.95265	0.35462
9.49	-3.02739	0.278327
9.5	-3.0934	0.207639
9.51	-3.14229	0.143491
9.52	-3.17281	0.0917991
9.53	-3.18215	0.0603476
9.54	-3.16752	0.0454003
9.55	-3.13762	0.0463346
9.56	-3.09839	0.0584792
9.57	-3.05417	0.0805885
9.58	-3.01151	0.110171
9.59	-2.97383	0.143802
9.6	-2.94238	0.176499
9.61	-2.91466	0.207639
9.62	-2.88695	0.234419
9.63	-2.8555	0.260889
9.64	-2.82124	0.285178
9.65	-2.78201	0.308533
9.66	-2.7409	0.330954
9.67	-2.6945	0.355554
9.68	-2.64748	0.378286
9.69	-2.59548	0.395413
9.7	-2.536	0.406
9.71	-2.46407	0.408803
9.72	-2.37407	0.405689
9.73	-2.25917	0.390742
9.74	-2.11686	0.368632
9.75	-1.94061	0.344655
9.76	-1.73103	0.321923
9.77	-1.49406	0.299813
9.78	-1.23155	0.279884
9.79	-0.954094	0.269296
9.8	-0.671033	0.268362
9.81	-0.392019	0.27895
9.82	-0.131689	0.296388
9.83	0.104974	0.319432
9.84	0.308629	0.352751
9.85	0.479899	0.400084
9.86	0.616603	0.461741
9.87	0.723724	0.529314
9.88	0.800951	0.607476
9.89	0.850774	0.696224
9.9	0.873507	0.794627
9.91	0.869147	0.896765
9.92	0.839564	0.997347
9.93	0.783824	1.10104
9.94	0.704417	1.20474
9.95	0.606326	1.30408
9.96	0.496714	1.39812
9.97	0.379317	1.48562
9.98	0.263165	1.56503
9.99	0.152307	1.63945
10	0.0495449	1.70765
10.01	-0.0435633	1.77055
10.02	-0.126395	1.83314
10.03	-0.202377	1.89604
10.04	-0.272753	1.96175
10.05	-0.338769	2.02963
10.06	-0.400426	2.09752
10.07	-0.45243	2.16727
10.08	-0.486995	2.23454
10.09	-0.499763	2.29744
10.1	-0.486373	2.35256
10.11	-0.449316	2.40861
10.12	-0.386102	2.45687
10.13	-0.30109	2.50016
10.14	-0.202065	2.53223
10.15	-0.095567	2.5587
10.16	0.00657187	2.58984
10.17	0.103105	2.63064
10.18	0.185938	2.67984
10.19	0.249152	2.73931
10.2	0.288699	2.81
10.21	0.303646	2.89252
10.22	0.292125	2.97598
10.23	0.254134	3.05507
10.24	0.1931	3.12763
10.25	0.11961	3.18679
10.26	0.036466	3.23132
10.27	-0.0479231	3.25001
10.28	-0.12733	3.24347
10.29	-0.192101	3.21388
10.3	-0.246284	3.16686
10.31	-0.28552	3.10334
10.32	-0.310121	3.02487
10.33	-0.321331	2.93238
10.34	-0.31666	2.82806
10.35	-0.300779	2.71565
10.36	-0.275867	2.59296
10.37	-0.242547	2.45905
10.38	-0.201443	2.32297
10.39	-0.153799	2.18751
10.4	-0.0989923	2.05143
10.41	-0.0426292	1.91535
10.42	0.0118656	1.77989
10.43	0.0620009	1.64942
10.44	0.107465	1.53171
10.45	0.142965	1.42739
10.46	0.168188	1.33926
10.47	0.182824	1.27107
10.48	0.189674	1.21906
10.49	0.184692	1.17952
10.5	0.166008	1.1437
10.51	0.132688	1.10914
10.52	0.0884697	1.07271
10.53	0.0370888	1.02849
10.54	-0.0161603	0.979909
10.55	-0.0616246	0.929462
10.56	-0.0874706	0.879639
10.57	-0.0862251	0.835109
10.58	-0.055708	0.798052
10.59	0.00688323	0.766912
10.6	0.0962548	0.739198
10.61	0.208981	0.719891
10.62	0.337277	0.706189
10.63	0.475227	0.69747
10.64	0.616914	0.694045
10.65	0.755486	0.698716
10.66	0.886585	0.707123
10.67	1.00461	0.722693
10.68	1.1055	0.741377
10.69	1.18023	0.763798
10.7	1.22912	0.789956
10.71	1.24625	0.818604
10.72	1.2338	0.845073
10.73	1.18864	0.868428
10.74	1.12107	0.888358
10.75	1.03014	0.907976
10.76	0.923019	0.926037
10.77	0.810915	0.94223
10.78	0.696943	0.956554
10.79	0.588265	0.96683
10.8	0.487372	0.972124
10.81	0.396755	0.969633
10.82	0.315791	0.957177
10.83	0.239187	0.935067
10.84	0.166942	0.904862
10.85	0.0915837	0.859086
10.86	0.0115541	0.794315
10.87	-0.0831112	0.713974
10.88	-0.191789	0.62398
10.89	-0.317906	0.528069
10.9	-0.461772	0.429044
10.91	-0.618717	0.328773
10.92	-0.782513	0.232863
10.93	-0.948801	0.13882
10.94	-1.11011	0.0457117
10.95	-1.26144	-0.0464623
10.96	-1.39877	-0.138014
10.97	-1.52146	-0.230188
10.98	-1.63076	-0.317691
10.99	-1.7245	-0.402703
11	-1.80141	-0.485223
11.01	-1.86151	-0.565253
11.02	-1.89888	-0.637498
11.03	-1.90947	-0.700089
11.04	-1.89016	-0.755829
11.05	-1.83878	-0.805965
11.06	-1.75595	-0.848003
11.07	-1.64758	-0.875095
11.08	-1.52395	-0.88288
11.09	-1.39348	-0.872292
11.1	-1.26798	-0.847692
11.11	-1.15401	-0.813127
11.12	-1.06122	-0.767351
11.13	-0.993019	-0.716282
11.14	-0.949735	-0.661475
11.15	-0.927002	-0.603244
11.16	-0.916415	-0.546258
11.17	-0.910187	-0.4955
11.18	-0.898977	-0.445987
11.19	-0.870017	-0.398032
11.2	-0.815833	-0.350699
11.21	-0.73051	-0.302744
11.22	-0.611244	-0.258214
11.23	-0.458347	-0.218978
11.24	-0.273688	-0.185658
11.25	-0.0700327	-0.158878
11.26	0.14639	-0.139571
11.27	0.359387	-0.125246
11.28	0.558682	-0.110611
11.29	0.732132	-0.0937952
11.3	0.876309	-0.0754227
11.31	0.978137	-0.0539361
11.32	1.03481	-0.0262216
11.33	1.04446	0.0114577
11.34	1.00647	0.0631499
11.35	0.928936	0.130101
11.36	0.817766	0.213867
11.37	0.683242	0.316629
11.38	0.539375	0.434649
11.39	0.390527	0.558274
11.4	0.24666	0.683768
11.41	0.119921	0.805214
11.42	0.0109311	0.919809
11.43	-0.0753265	1.02568
11.44	-0.137295	1.11755
11.45	-0.17186	1.19789
11.46	-0.181202	1.26608
11.47	-0.166566	1.32276
11.48	-0.132624	1.37227
11.49	-0.082177	1.41711
11.5	-0.0208315	1.46133
11.51	0.046742	1.50212
11.52	0.111202	1.53762
11.53	0.168811	1.56845
11.54	0.213652	1.58807
11.55	0.242612	1.59492
11.56	0.252888	1.58683
11.57	0.241055	1.5644
11.58	0.207736	1.53358
11.59	0.152307	1.49403
11.6	0.0775709	1.45355
11.61	-0.0177173	1.41587
11.62	-0.132001	1.38722
11.63	-0.264657	1.36667
11.64	-0.409457	1.35546
11.65	-0.560486	1.35078
11.66	-0.7084	1.35546
11.67	-0.843236	1.36418
11.68	-0.955651	1.37757
11.69	-1.03537	1.39874
11.7	-1.07896	1.42801
11.71	-1.08239	1.47161
11.72	-1.05032	1.52641
11.73	-0.98648	1.59305
11.74	-0.905204	1.67184
11.75	-0.811162	1.75436
11.76	-0.717742	1.84062
11.77	-0.633353	1.925
11.78	-0.569828	2.00472
11.79	-0.534328	2.08413
11.8	-0.527477	2.16229
11.81	-0.549898	2.24325
11.82	-0.597231	2.32764
11.83	-0.662936	2.41888
11.84	-0.742031	2.51729
11.85	-0.826421	2.6269
11.86	-0.908007	2.74585
11.87	-0.97994	2.8701
11.88	-1.03879	2.99373
11.89	-1.07585	3.11081
11.9	-1.08582	3.21824
11.91	-1.06651	3.30512
11.92	-1.02167	3.36273
11.93	-0.949112	3.39418
11.94	-0.857872	3.39854
11.95	-0.749505	3.37986
11.96	-0.633042	3.34031
11.97	-0.505991	3.28956
11.98	-0.375515	3.22852
11.99	-0.244416	3.16562
12	-0.116431	3.10303
12.01	0.00844018	3.04573
12.02	0.125215	2.99528
12.03	0.231713	2.95324
12.04	0.32451	2.92273
12.05	0.405163	2.89999
12.06	0.472425	2.88287
12.07	0.527854	2.86294
12.08	0.569581	2.83522
12.09	0.601344	2.79661
12.1	0.624699	2.74897
12.11	0.642448	2.69167
12.12	0.65615	2.62409
12.13	0.67172	2.54407
12.14	0.694141	2.45283
12.15	0.717184	2.34944
12.16	0.744899	2.23578
12.17	0.767319	2.1162
12.18	0.777596	1.9851
12.19	0.766385	1.84591
12.2	0.727149	1.70547
12.21	0.659264	1.56129
12.22	0.559616	1.41898
12.23	0.439105	1.27823
12.24	0.302401	1.14339
12.25	0.161648	1.01665
12.26	0.0236986	0.901748
12.27	-0.101173	0.803346
12.28	-0.209851	0.719268
12.29	-0.297043	0.653874
12.3	-0.365239	0.611524
12.31	-0.407589	0.591594
12.32	-0.426584	0.586612
12.33	-0.422848	0.593774
12.34	-0.398247	0.61059
12.35	-0.361502	0.632699
12.36	-0.317595	0.655742
12.37	-0.278047	0.676295
12.38	-0.252201	0.689062
12.39	-0.240057	0.69965
12.4	-0.248776	0.707746
12.41	-0.27867	0.714908
12.42	-0.327248	0.721759
12.43	-0.389528	0.729233
12.44	-0.462084	0.738263
12.45	-0.538688	0.744491
12.46	-0.611555	0.746671
12.47	-0.678506	0.746048
12.48	-0.738918	0.741689
12.49	-0.794347	0.734838
12.5	-0.842302	0.723005
12.51	-0.882784	0.704632
12.52	-0.918906	0.685326
12.53	-0.948801	0.665707
12.54	-0.972156	0.649515
12.55	-0.987414	0.63301
12.56	-1.0008	0.621489
12.57	-1.01264	0.613392
12.58	-1.02073	0.605296
12.59	-1.02572	0.598134
12.6	-1.02291	0.587546
12.61	-1.00921	0.573222
12.62	-0.980251	0.553292
12.63	-0.938213	0.528692
12.64	-0.876244	0.497241
12.65	-0.800574	0.461741
12.66	-0.714005	0.423439
12.67	-0.621831	0.385137
12.68	-0.525609	0.349014
12.69	-0.429387	0.311335
12.7	-0.336901	0.270542
12.71	-0.248775	0.222275
12.72	-0.168435	0.170583
12.73	-0.0908961	0.114219
12.74	-0.0170945	0.0516283
12.75	0.05515	-0.0128313
12.76	0.12646	-0.0813391
12.77	0.191543	-0.153272
12.78	0.252888	-0.232056
12.79	0.306449	-0.318936
12.8	0.347865	-0.409865
12.81	0.373088	-0.506399
12.82	0.380873	-0.606669
12.83	0.371532	-0.710677
12.84	0.348488	-0.8206
12.85	0.319216	-0.932393
12.86	0.284962	-1.04574
12.87	0.253823	-1.15878
12.88	0.231713	-1.26933
12.89	0.221749	-1.37614
12.9	0.222994	-1.47703
12.91	0.236696	-1.56453
12.92	0.267213	-1.6318
12.93	0.311431	-1.6785
12.94	0.366549	-1.70404
12.95	0.42447	-1.71214
12.96	0.476473	-1.70653
12.97	0.506367	-1.6919
12.98	0.505433	-1.67072
12.99	0.467442	-1.64736
13	0.383987	-1.6237
13.01	0.252577	-1.6019
13.02	0.0753909	-1.58758
13.03	-0.143834	-1.58259
13.04	-0.399181	-1.59318
13.05	-0.684734	-1.61373
13.06	-0.987102	-1.64923
13.07	-1.29414	-1.69843
13.08	-1.58779	-1.75978
13.09	-1.85622	-1.83296
13.1	-2.08665	-1.91486
13.11	-2.27038	-1.99956
13.12	-2.40677	-2.08021
13.13	-2.49926	-2.1509
13.14	-2.55936	-2.20664
13.15	-2.59236	-2.24681
13.16	-2.61229	-2.26456
13.17	-2.62413	-2.25926
13.18	-2.63129	-2.22781
13.19	-2.63534	-2.17363
13.2	-2.63596	-2.10045
13.21	-2.63627	-2.00828
13.22	-2.63191	-1.90084
13.23	-2.62973	-1.78127
13.24	-2.63222	-1.65422
13.25	-2.63876	-1.52249
13.26	-2.6506	-1.39108
13.27	-2.66025	-1.26434
13.28	-2.66959	-1.15068
13.29	-2.67208	-1.05508
13.3	-2.66461	-0.982839
13.31	-2.64624	-0.942669
13.32	-2.61323	-0.935507
13.33	-2.56776	-0.963532
13.34	-2.51047	-1.02706
13.35	-2.44102	-1.12079
13.36	-2.3638	-1.2441
13.37	-2.28034	-1.39326
13.38	-2.19502	-1.5583
13.39	-2.11406	-1.73487
13.4	-2.03963	-1.91486
13.41	-1.97611	-2.09329
13.42	-1.92348	-2.2658
13.43	-1.88829	-2.42898
13.44	-1.8693	-2.57627
13.45	-1.87023	-2.70612
13.46	-1.89172	-2.81542
13.47	-1.93282	-2.90168
13.48	-1.98918	-2.96707
13.49	-2.05084	-3.01378
13.5	-2.11717	-3.0415
13.51	-2.18256	-3.04648
13.52	-2.23737	-3.03434
13.53	-2.28314	-3.00444
13.54	-2.31927	-2.95991
13.55	-2.34667	-2.90012
13.56	-2.36317	-2.83161
13.57	-2.36816	-2.75999
13.58	-2.36442	-2.68962
13.59	-2.35445	-2.62298
13.6	-2.34262	-2.56007
13.61	-2.33452	-2.50527
13.62	-2.33484	-2.4598
13.63	-2.33826	-2.42804
13.64	-2.35352	-2.40905
13.65	-2.37501	-2.40313
13.66	-2.40366	-2.4106
13.67	-2.43729	-2.43178
13.68	-2.47808	-2.46977
13.69	-2.52448	-2.5199
13.7	-2.5796	-2.5772
13.71	-2.64281	-2.64104
13.72	-2.71692	-2.70581
13.73	-2.80567	-2.76342
13.74	-2.90563	-2.80982
13.75	-3.01524	-2.84501
13.76	-3.13015	-2.86805
13.77	-3.24599	-2.87397
13.78	-3.35716	-2.85995
13.79	-3.45463	-2.82414
13.8	-3.53061	-2.77338
13.81	-3.57483	-2.70986
13.82	-3.58292	-2.63263
13.83	-3.55147	-2.54482
13.84	-3.4811	-2.44641
13.85	-3.37491	-2.34521
13.86	-3.23883	-2.24245
13.87	-3.0797	-2.13221
13.88	-2.9075	-2.01357
13.89	-2.73218	-1.88995
13.9	-2.55967	-1.7685
13.91	-2.40023	-1.65204
13.92	-2.26104	-1.54242
13.93	-2.14457	-1.44807
13.94	-2.05084	-1.37333
13.95	-1.97766	-1.32102
13.96	-1.91507	-1.28801
13.97	-1.85466	-1.27462
13.98	-1.79207	-1.28116
13.99	-1.72699	-1.30919
14	-1.65474	-1.35154
14.01	-1.57502	-1.40323
14.02	-1.48752	-1.4571
14.03	-1.3913	-1.51595
14.04	-1.28324	-1.57325
14.05	-1.16304	-1.62557
14.06	-1.03724	-1.6648
14.07	-0.90645	-1.69563
14.08	-0.778465	-1.7193
14.09	-0.657642	-1.73611
14.1	-0.553324	-1.74203
14.11	-0.468	-1.74483
14.12	-0.404475	-1.75293
14.13	-0.36337	-1.77099
14.14	-0.340015	-1.79528
14.15	-0.328494	-1.82362
14.16	-0.323823	-1.86348
14.17	-0.321643	-1.91672
14.18	-0.319774	-1.98087
14.19	-0.317595	-2.05
14.2	-0.316972	-2.12474
14.21	-0.32102	-2.20944
14.22	-0.330362	-2.29788
14.23	-0.350292	-2.3832
14.24	-0.376449	-2.45762
14.25	-0.413817	-2.51991
14.26	-0.45679	-2.57284
14.27	-0.507548	-2.61364
14.28	-0.55924	-2.62827
14.29	-0.614358	-2.61955
14.3	-0.659822	-2.59371
14.31	-0.694387	-2.55042
14.32	-0.710892	-2.48223
14.33	-0.704041	-2.386
14.34	-0.671967	-2.26549
14.35	-0.614358	-2.1291
14.36	-0.530903	-1.97807
14.37	-0.421913	-1.80867
14.38	-0.291126	-1.6293
14.39	-0.144457	-1.44464
14.4	0.0121771	-1.26185
14.41	0.174105	-1.08093
14.42	0.333229	-0.90063
14.43	0.487372	-0.725624
14.44	0.632484	-0.56463
14.45	0.773859	-0.421387
14.46	0.91212	-0.292468
14.47	1.0535	-0.185346
14.48	1.20172	-0.105628
14.49	1.35649	-0.0551816
14.5	1.5234	-0.0321383
14.51	1.6984	-0.035875
14.52	1.87683	-0.0654579
14.53	2.05433	-0.126181
14.54	2.22903	-0.214929
14.55	2.39282	-0.32641
14.56	2.54136	-0.454084
14.57	2.66623	-0.597327
14.58	2.76121	-0.74711
14.59	2.82162	-0.895959
14.6	2.84902	-1.03173
14.61	2.84809	-1.15162
14.62	2.82224	-1.25345
14.63	2.77771	-1.32849
14.64	2.72166	-1.37084
14.65	2.66218	-1.37956
14.66	2.60395	-1.35683
14.67	2.55475	-1.30389
14.68	2.51707	-1.21919
14.69	2.48811	-1.10429
14.7	2.46818	-0.965401
14.71	2.45261	-0.811882
14.72	2.43829	-0.650888
14.73	2.42116	-0.491452
14.74	2.40123	-0.341981
14.75	2.3732	-0.213061
14.76	2.33988	-0.110923
14.77	2.30532	-0.0358752
14.78	2.27449	0.00958899
14.79	2.25207	0.0176853
14.8	2.24055	-0.0109634
14.81	2.23961	-0.0719975
14.82	2.24865	-0.163549
14.83	2.26889	-0.2797
14.84	2.29442	-0.416405
14.85	2.32058	-0.562762
14.86	2.34642	-0.70912
14.87	2.36698	-0.853608
14.88	2.37788	-0.999032
14.89	2.37819	-1.13823
14.9	2.36511	-1.26248
14.91	2.34549	-1.36617
14.92	2.31902	-1.45118
14.93	2.29318	-1.51191
14.94	2.27325	-1.54647
14.95	2.25954	-1.54927
14.96	2.25051	-1.52343
14.97	2.24179	-1.47267
14.98	2.23525	-1.40354
14.99	2.23027	-1.31604
15	2.22311	-1.21545
15.01	2.20816	-1.10709
15.02	2.18045	-1.00277
15.03	2.1328	-0.899073
15.04	2.05838	-0.796623
15.05	1.94939	-0.698221
15.06	1.81269	-0.607604
15.07	1.64453	-0.521969
15.08	1.45396	-0.441317
15.09	1.24594	-0.35973
15.1	1.03263	-0.286551
15.11	0.820569	-0.22396
15.12	0.625322	-0.170399
15.13	0.455609	-0.117461
15.14	0.322019	-0.0751112
15.15	0.227665	-0.0473965
15.16	0.17753	-0.0324494
15.17	0.171925	-0.0318264
15.18	0.20649	-0.0433482
15.19	0.275932	-0.0735538
15.2	0.374957	-0.125557
15.21	0.498895	-0.19064
15.22	0.636222	-0.265998
15.23	0.784447	-0.347896
15.24	0.935787	-0.44443
15.25	1.08806	-0.550306
15.26	1.23784	-0.654624
15.27	1.38451	-0.753027
15.28	1.52713	-0.850806
15.29	1.66446	-0.945471
15.3	1.78995	-1.02924
15.31	1.90175	-1.09183
15.32	1.99392	-1.14103
15.33	2.059	-1.18182
15.34	2.09232	-1.21732
15.35	2.08796	-1.24317
15.36	2.04343	-1.25812
15.37	1.9525	-1.26964
15.38	1.81767	-1.27711
15.39	1.64515	-1.28085
15.4	1.4415	-1.27493
15.41	1.21542	-1.26497
15.42	0.978448	-1.26092
15.43	0.742408	-1.26372
15.44	0.520069	-1.26995
15.45	0.319839	-1.27369
15.46	0.147947	-1.28147
15.47	0.0103085	-1.28801
15.48	-0.0899619	-1.2877
15.49	-0.154421	-1.27119
15.5	-0.185873	-1.23663
15.51	-0.190232	-1.18431
15.52	-0.172483	-1.11332
15.53	-0.137606	-1.01678
15.54	-0.0921416	-0.894713
15.55	-0.0395152	-0.753027
15.56	0.019028	-0.598884
15.57	0.0847333	-0.4354
15.58	0.160403	-0.269113
15.59	0.251643	-0.109053
15.6	0.354405	0.0301419
15.61	0.470245	0.144737
15.62	0.596673	0.240025
15.63	0.72497	0.309155
15.64	0.850464	0.352128
15.65	0.961011	0.36583
15.66	1.0535	0.351817
15.67	1.11827	0.315695
15.68	1.15408	0.258709
15.69	1.16186	0.180548
15.7	1.14162	0.0808998
15.71	1.09585	-0.0324496
15.72	1.02952	-0.153584
15.73	0.946375	-0.284682
15.74	0.852955	-0.422944
15.75	0.754553	-0.558402
15.76	0.655528	-0.682339
15.77	0.557749	-0.794753
15.78	0.464018	-0.884748
15.79	0.366861	-0.946716
15.8	0.268459	-0.974431
15.81	0.163517	-0.966023
15.82	0.0482993	-0.92741
15.83	-0.0849795	-0.863262
15.84	-0.238188	-0.774824
15.85	-0.413505	-0.673308
15.86	-0.615915	-0.564007
15.87	-0.836385	-0.459066
15.88	-1.06993	-0.358796
15.89	-1.30629	-0.264442
15.9	-1.5361	-0.17943
15.91	-1.75657	-0.109365
15.92	-1.96178	-0.051756
15.93	-2.15703	-0.00255503
15.94	-2.34324	0.0401066
15.95	-2.52136	0.076229
15.96	-2.68859	0.108926
15.97	-2.84117	0.13882
15.98	-2.97476	0.173074
15.99	-3.08437	0.209508
16	-3.1616	0.251858
16.01	-3.19617	0.298568
16.02	-3.18496	0.355242
16.03	-3.1233	0.422193
16.04	-3.01213	0.494749
16.05	-2.85269	0.567616
16.06	-2.65714	0.63955
16.07	-2.43386	0.712106
16.08	-2.19409	0.780302
16.09	-1.94777	0.83324
16.1	-1.69958	0.871231
16.11	-1.46043	0.899568
16.12	-1.23747	0.916072
16.13	-1.03817	0.913892
16.14	-0.86659	0.896454
16.15	-0.721478	0.870919
16.16	-0.608752	0.839468
16.17	-0.524363	0.807082
16.18	-0.464574	0.770026
16.19	-0.425338	0.73764
16.2	-0.402917	0.715531
16.21	-0.389527	0.703386
16.22	-0.379874	0.69311
16.23	-0.367106	0.682211
16.24	-0.347488	0.676294
16.25	-0.319151	0.674426
16.26	-0.282718	0.672246
16.27	-0.244416	0.663216
16.28	-0.207359	0.65076
16.29	-0.174351	0.633633
16.3	-0.153176	0.613081
16.31	-0.143211	0.584432
16.32	-0.146014	0.557029
16.33	-0.15847	0.534608
16.34	-0.177777	0.521841
16.35	-0.198329	0.516547
16.36	-0.213588	0.51717
16.37	-0.215456	0.526512
16.38	-0.196461	0.540213
16.39	-0.152242	0.559208
16.4	-0.0831115	0.576335
16.41	0.0162247	0.598445
16.42	0.143276	0.632076
16.43	0.291502	0.680343
16.44	0.451872	0.740754
16.45	0.60944	0.808951
16.46	0.754241	0.885243
16.47	0.871327	0.96683
16.48	0.947619	1.04811
16.49	0.97658	1.11973
16.5	0.95229	1.17796
16.51	0.876932	1.22031
16.52	0.756109	1.24709
16.53	0.596361	1.25114
16.54	0.407965	1.23183
16.55	0.200573	1.19073
16.56	-0.0167833	1.13499
16.57	-0.237876	1.06803
16.58	-0.458347	0.992987
16.59	-0.677571	0.914204
16.6	-0.891191	0.839156
16.61	-1.10076	0.772206
16.62	-1.30535	0.709615
16.63	-1.50527	0.655431
16.64	-1.69927	0.608721
16.65	-1.88362	0.57291
16.66	-2.05863	0.548621
16.67	-2.22055	0.528069
16.68	-2.36473	0.513433
16.69	-2.48711	0.504402
16.7	-2.58458	0.504714
16.71	-2.65122	0.51281
16.72	-2.68298	0.522152
16.73	-2.67675	0.542704
16.74	-2.6397	0.576335
16.75	-2.57337	0.623357
16.76	-2.48587	0.680031
16.77	-2.38342	0.746982
16.78	-2.27723	0.820161
16.79	-2.16699	0.894897
16.8	-2.058	0.961848
16.81	-1.94933	1.01323
16.82	-1.84314	1.05029
16.83	-1.73539	1.07738
16.84	-1.62049	1.08796
16.85	-1.49531	1.08298
16.86	-1.35175	1.06461
16.87	-1.19013	1.04188
16.88	-1.01108	1.01354
16.89	-0.818947	0.976483
16.9	-0.619341	0.93351
16.91	-0.417554	0.887423
16.92	-0.218882	0.841648
16.93	-0.025814	0.794626
16.94	0.161337	0.745425
16.95	0.348177	0.691865
16.96	0.5291	0.636747
16.97	0.707843	0.579138
16.98	0.882226	0.509385
16.99	1.04882	0.430601
17	1.20764	0.338115
17.01	1.35306	0.235042
17.02	1.48323	0.124496
17.03	1.59782	0.0046073
17.04	1.69996	-0.118707
17.05	1.79151	-0.238284
17.06	1.87279	-0.350076
17.07	1.95032	-0.451904
17.08	2.02444	-0.531933
17.09	2.09544	-0.583003
17.1	2.16083	-0.602621
17.11	2.22218	-0.595147
17.12	2.27511	-0.562139
17.13	2.32058	-0.500171
17.14	2.35359	-0.411733
17.15	2.36635	-0.302744
17.16	2.35981	-0.183166
17.17	2.32432	-0.0570498
17.18	2.26017	0.0759175
17.19	2.16394	0.210131
17.2	2.03565	0.338427
17.21	1.87185	0.456759
17.22	1.67131	0.566371
17.23	1.4362	0.669133
17.24	1.16684	0.763798
17.25	0.869459	0.850367
17.26	0.548717	0.925725
17.27	0.216143	0.994856
17.28	-0.116742	1.05869
17.29	-0.434369	1.11412
17.3	-0.724904	1.15834
17.31	-0.977137	1.19633
17.32	-1.18453	1.22342
17.33	-1.34241	1.23962
17.34	-1.45078	1.24522
17.35	-1.5115	1.24148
17.36	-1.53112	1.2309
17.37	-1.51368	1.21595
17.38	-1.46821	1.20069
17.39	-1.40344	1.18014
17.4	-1.32186	1.15741
17.41	-1.23871	1.13
17.42	-1.16024	1.09544
17.43	-1.09173	1.04655
17.44	-1.03911	0.983334
17.45	-1.00143	0.907976
17.46	-0.978694	0.822652
17.47	-0.968107	0.725184
17.48	-0.964058	0.621177
17.49	-0.959388	0.514367
17.5	-0.945997	0.41036
17.51	-0.917971	0.313515
17.52	-0.868459	0.222275
17.53	-0.79528	0.145359
17.54	-0.696878	0.087128
17.55	-0.574498	0.0482031
17.56	-0.434992	0.0260937
17.57	-0.279292	0.0204885
17.58	-0.110203	0.0307648
17.59	0.067606	0.0587907
17.6	0.247283	0.0939788
17.61	0.424781	0.130724
17.62	0.595427	0.163421
17.63	0.757978	0.188021
17.64	0.909629	0.19892
17.65	1.05038	0.188332
17.66	1.18366	0.157193
17.67	1.31102	0.10986
17.68	1.43122	0.0534966
17.69	1.54177	-0.00784887
17.7	1.64142	-0.0729313
17.71	1.72736	-0.133654
17.72	1.79556	-0.180987
17.73	1.84102	-0.217732
17.74	1.86843	-0.244512
17.75	1.88026	-0.265999
17.76	1.88369	-0.278455
17.77	1.88306	-0.284683
17.78	1.88649	-0.289976
17.79	1.89739	-0.294647
17.8	1.91047	-0.292156
17.81	1.92728	-0.280323
17.82	1.94534	-0.259771
17.83	1.95998	-0.235482
17.84	1.96589	-0.207144
17.85	1.9606	-0.168842
17.86	1.94005	-0.120264
17.87	1.89739	-0.0663919
17.88	1.83573	-0.00629196
17.89	1.75477	0.0640842
17.9	1.65512	0.139443
17.91	1.54052	0.220095
17.92	1.41596	0.301059
17.93	1.28362	0.378909
17.94	1.14723	0.456758
17.95	1.00679	0.535854
17.96	0.866656	0.609344
17.97	0.728395	0.677852
17.98	0.595739	0.748539
17.99	0.473359	0.825144
18	0.355027	0.903616
18.01	0.246972	0.97804
18.02	0.142964	1.04437
18.03	0.0423825	1.10852
18.04	-0.0581995	1.16675
18.05	-0.160338	1.2119
18.06	-0.264968	1.24553
18.07	-0.378317	1.26266
18.08	-0.496026	1.26608
18.09	-0.617783	1.25456
18.1	-0.741097	1.22965
18.11	-0.862231	1.19851
18.12	-0.973089	1.1627
18.13	-1.07274	1.12222
18.14	-1.15308	1.07551
18.15	-1.20664	1.02444
18.16	-1.23342	0.970878
18.17	-1.22719	0.915449
18.18	-1.19231	0.85784
18.19	-1.12661	0.794626
18.2	-1.03444	0.729855
18.21	-0.919529	0.668198
18.22	-0.780645	0.614326
18.23	-0.620274	0.565748
18.24	-0.439352	0.521841
18.25	-0.239745	0.48385
18.26	-0.0276821	0.455824
18.27	0.190609	0.436517
18.28	0.407653	0.418145
18.29	0.611931	0.403509
18.3	0.795345	0.39697
18.31	0.949176	0.39261
18.32	1.06751	0.389496
18.33	1.15003	0.387939
18.34	1.19767	0.389496
18.35	1.21013	0.396347
18.36	1.19394	0.410049
18.37	1.15252	0.428421
18.38	1.09117	0.452399
18.39	1.01519	0.482605
18.4	0.928936	0.52153
18.41	0.839253	0.567305
18.42	0.752061	0.618375
18.43	0.669229	0.67972
18.44	0.595116	0.752899
18.45	0.531279	0.837288
18.46	0.478653	0.929774
18.47	0.43568	1.0316
18.48	0.405474	1.13841
18.49	0.385233	1.25269
18.5	0.36904	1.36542
18.51	0.35129	1.46538
18.52	0.322019	1.55226
18.53	0.279357	1.62139
18.54	0.214586	1.66654
18.55	0.128952	1.68647
18.56	0.0265013	1.67807
18.57	-0.0905847	1.64288
18.58	-0.221061	1.58558
18.59	-0.359322	1.50524
18.6	-0.498206	1.41369
18.61	-0.634599	1.31622
18.62	-0.759781	1.2228
18.63	-0.869082	1.1381
18.64	-0.961256	1.06648
18.65	-1.03226	1.01728
18.66	-1.08395	0.986448
18.67	-1.12007	0.980843
18.68	-1.14405	0.994545
18.69	-1.15432	1.02382
18.7	-1.15152	1.06866
18.71	-1.13377	1.11879
18.72	-1.10076	1.16924
18.73	-1.05094	1.21782
18.74	-0.983365	1.25986
18.75	-0.906138	1.29473
18.76	-0.818013	1.31715
18.77	-0.722413	1.33086
18.78	-0.623077	1.33179
18.79	-0.520627	1.32151
18.8	-0.410703	1.29691
18.81	-0.297042	1.2583
18.82	-0.174974	1.20754
18.83	-0.0441862	1.14713
18.84	0.0928295	1.07831
18.85	0.23763	0.999838
18.86	0.389904	0.911401
18.87	0.550586	0.813933
18.88	0.713447	0.705255
18.89	0.878489	0.581941
18.9	1.04446	0.446482
18.91	1.20919	0.300125
18.92	1.36801	0.140689
18.93	1.52495	-0.0287123
18.94	1.67225	-0.20839
18.95	1.80459	-0.393361
18.96	1.92012	-0.579889
18.97	2.01074	-0.765171
18.98	2.07457	-0.94734
18.99	2.11069	-1.12702
19	2.12409	-1.30078
19.01	2.11038	-1.46364
19.02	2.08267	-1.61903
19.03	2.03845	-1.76538
19.04	1.98084	-1.90178
19.05	1.91171	-2.02229
19.06	1.83262	-2.1319
19.07	1.74792	-2.22563
19.08	1.65512	-2.30722
19.09	1.55796	-2.3723
19.1	1.45676	-2.42088
19.11	1.354	-2.45607
19.12	1.24594	-2.46572
19.13	1.1382	-2.45077
19.14	1.03014	-2.41372
19.15	0.918659	-2.36234
19.16	0.808424	-2.30006
19.17	0.699746	-2.23186
19.18	0.595427	-2.16024
19.19	0.496091	-2.09235
19.2	0.403605	-2.03039
19.21	0.327624	-1.97496
19.22	0.271572	-1.92607
19.23	0.237318	-1.88029
19.24	0.227353	-1.84043
19.25	0.236384	-1.81054
19.26	0.265655	-1.78656
19.27	0.30676	-1.76912
19.28	0.355961	-1.76071
19.29	0.406719	-1.76009
19.3	0.459034	-1.76507
19.31	0.509792	-1.76974
19.32	0.556191	-1.77161
19.33	0.596984	-1.77504
19.34	0.632795	-1.77597
19.35	0.664558	-1.77473
19.36	0.695386	-1.77068
19.37	0.727772	-1.76632
19.38	0.763894	-1.76227
19.39	0.806556	-1.75168
19.4	0.854511	-1.73736
19.41	0.907449	-1.72272
19.42	0.958207	-1.71089
19.43	1.00834	-1.70622
19.44	1.05132	-1.70778
19.45	1.08401	-1.71805
19.46	1.1055	-1.73705
19.47	1.11453	-1.76788
19.48	1.10332	-1.80151
19.49	1.07062	-1.83919
19.5	1.01613	-1.87624
19.51	0.942014	-1.90707
19.52	0.849529	-1.92825
19.53	0.742096	-1.93447
19.54	0.626256	-1.92482
19.55	0.504499	-1.90396
19.56	0.379939	-1.89524
19.57	0.259739	-1.93292
19.58	0.151061	-2.02634
19.59	0.0613779	-2.11073
19.6	-0.00370455	-2.10107
19.61	-0.0357786	-1.92513
19.62	-0.0301734	-1.54398
19.63	0.0134225	-0.942669
19.64	0.0968774	-0.123378
19.65	0.213963	0.883998
19.66	0.358764	2.0396
19.67	0.526919	3.28395
19.68	0.713447	4.56069
19.69	0.916791	5.81251
19.7	1.13633	6.99551
19.71	1.37206	8.07389
19.72	1.63114	9.02179
19.73	1.91358	9.82271
19.74	2.21688	10.4791
19.75	2.54198	11.0001
19.76	2.87923	11.3987
19.77	3.22208	11.688
19.78	3.55496	11.8926
19.79	3.86854	12.0324
19.8	4.15316	12.1261
19.81	4.40539	12.1887
19.82	4.61777	12.2314
19.83	4.7934	12.2659
19.84	4.93726	12.3046
19.85	5.04688	12.3522
19.86	5.12504	12.4101
19.87	5.17642	12.4827
19.88	5.2032	12.5745
19.89	5.20413	12.6885
19.9	5.18514	12.8246
19.91	5.14434	12.9781
19.92	5.08829	13.1512
19.93	5.01262	13.3428
19.94	4.92263	13.5505
19.95	4.81738	13.7656
[truncated: 7,004 more rows]

## Sheet: Fig.S2b
Supplementary Figure S2				Supplementary Figure S2				Supplementary Figure S2
Supplementary Figure S2 b (left)				Supplementary Figure S2 b (left)				Supplementary Figure S2 b (right)
CaV1.4 + β2x13 + α2δ-4				CaV1.4 + β2x13 + α2δ-4				CaV1.4 + β2x13 + α2δ-4
ICa (pA)				ICa Boltzmman fit				ICa norm Boltzmann fit
Vm (mV)	Vehicle	5 µM ML218		Vm (mV)	Vehicle	5 µM ML218		Vm (mV)	Vehicle	5 µM ML218
-90	0.12144	0.11981		-90	-0.0114647	-0.0105719		-90	-0.000277752	-0.000574207
-85	0.0838029	0.42859		-89.4922	-0.012092	-0.0111321		-89.4922	-0.000292949	-0.000604634
-80	-0.374967	0.481981		-88.9844	-0.0127534	-0.0117218		-88.9844	-0.000308974	-0.000636664
-75	0.856354	0.677465		-88.4766	-0.0134509	-0.0123426		-88.4766	-0.000325871	-0.00067038
-70	0.0603794	1.06349		-87.9688	-0.0141863	-0.0129961		-87.9688	-0.000343688	-0.000705871
-65	0.685326	0.872895		-87.4609	-0.0149618	-0.0136839		-87.4609	-0.000362475	-0.000743231
-60	-0.0774512	-1.19095		-86.9531	-0.0157794	-0.0144079		-86.9531	-0.000382284	-0.000782555
-55	-0.127707	0.292456		-86.4453	-0.0166415	-0.01517		-86.4453	-0.00040317	-0.000823947
-50	-0.0820732	-0.532933		-85.9375	-0.0175506	-0.0159721		-85.9375	-0.000425193	-0.000867516
-45	-0.0165697	-0.616432		-85.4297	-0.018509	-0.0168165		-85.4297	-0.000448412	-0.000913373
-40	-1.27954	-0.667312		-84.9219	-0.0195195	-0.0177051		-84.9219	-0.000472894	-0.00096164
-35	-2.11894	-1.56778		-84.4141	-0.0205849	-0.0186404		-84.4141	-0.000498705	-0.00101244
-30	-3.76531	-3.52257		-83.9062	-0.0217082	-0.0196248		-83.9062	-0.000525919	-0.00106591
-25	-7.36178	-6.26805		-83.3984	-0.0228925	-0.0206609		-83.3984	-0.00055461	-0.00112218
-20	-13.8208	-8.61866		-82.8906	-0.024141	-0.0217513		-82.8906	-0.000584859	-0.0011814
-15	-19.5912	-12.07		-82.3828	-0.0254574	-0.0228988		-82.3828	-0.000616749	-0.00124373
-10	-26.4205	-13.3153		-81.875	-0.0268451	-0.0241065		-81.875	-0.000650369	-0.00130933
-5	-32.9774	-16.366		-81.3672	-0.0283081	-0.0253775		-81.3672	-0.000685813	-0.00137836
0	-36.1045	-16.1764		-80.8594	-0.0298504	-0.026715		-80.8594	-0.000723178	-0.001451
5	-39.7614	-18.4114		-80.3516	-0.0314763	-0.0281225		-80.3516	-0.000762568	-0.00152745
10	-41.2768	-17.0411		-79.8438	-0.0331903	-0.0296036		-79.8438	-0.000804092	-0.0016079
15	-40.6696	-15.8062		-79.3359	-0.0349971	-0.0311622		-79.3359	-0.000847865	-0.00169255
20	-38.0723	-13.642		-78.8281	-0.0369017	-0.0328022		-78.8281	-0.000894009	-0.00178163
25	-33.5993	-10.071		-78.3203	-0.0389095	-0.0345279		-78.3203	-0.00094265	-0.00187536
30	-27.8326	-7.33858		-77.8125	-0.0410259	-0.0363438		-77.8125	-0.000993923	-0.00197399
35	-23.4936	-4.23122		-77.3047	-0.0432567	-0.0382544		-77.3047	-0.00104797	-0.00207776
40	-18.1852	-3.86371		-76.7969	-0.0456082	-0.0402647		-76.7969	-0.00110494	-0.00218695
				-76.2891	-0.0480868	-0.0423798		-76.2891	-0.00116499	-0.00230183
				-75.7812	-0.0506992	-0.0446052		-75.7812	-0.00122828	-0.0024227
				-75.2734	-0.0534528	-0.0469465		-75.2734	-0.00129499	-0.00254986
				-74.7656	-0.0563551	-0.0494097		-74.7656	-0.0013653	-0.00268365
				-74.2578	-0.059414	-0.052001		-74.2578	-0.00143941	-0.0028244
				-73.75	-0.062638	-0.0547272		-73.75	-0.00151751	-0.00297247
				-73.2422	-0.0660358	-0.0575951		-73.2422	-0.00159983	-0.00312823
				-72.7344	-0.0696167	-0.0606119		-72.7344	-0.00168659	-0.00329209
				-72.2266	-0.0733907	-0.0637855		-72.2266	-0.00177802	-0.00346446
				-71.7188	-0.0773679	-0.0671237		-71.7188	-0.00187437	-0.00364577
				-71.2109	-0.0815592	-0.070635		-71.2109	-0.00197591	-0.00383649
				-70.7031	-0.0859761	-0.0743284		-70.7031	-0.00208292	-0.00403709
				-70.1953	-0.0906307	-0.0782131		-70.1953	-0.00219569	-0.00424809
				-69.6875	-0.0955355	-0.0822989		-69.6875	-0.00231451	-0.00447
				-69.1797	-0.100704	-0.0865961		-69.1797	-0.00243973	-0.0047034
				-68.6719	-0.10615	-0.0911155		-68.6719	-0.00257167	-0.00494887
				-68.1641	-0.111889	-0.0958684		-68.1641	-0.0027107	-0.00520702
				-67.6562	-0.117935	-0.100867		-67.6562	-0.00285718	-0.0054785
				-67.1484	-0.124306	-0.106123		-67.1484	-0.00301153	-0.00576399
				-66.6406	-0.131019	-0.11165		-66.6406	-0.00317416	-0.00606419
				-66.1328	-0.138091	-0.117462		-66.1328	-0.00334549	-0.00637987
				-65.625	-0.145542	-0.123573		-65.625	-0.00352601	-0.0067118
				-65.1172	-0.153392	-0.129999		-65.1172	-0.00371619	-0.0070608
				-64.6094	-0.161662	-0.136755		-64.6094	-0.00391655	-0.00742774
				-64.1016	-0.170375	-0.143858		-64.1016	-0.00412762	-0.00781353
				-63.5938	-0.179553	-0.151325		-63.5938	-0.00434998	-0.00821912
				-63.0859	-0.189221	-0.159176		-63.0859	-0.00458421	-0.00864551
				-62.5781	-0.199405	-0.167428		-62.5781	-0.00483094	-0.00909374
				-62.0703	-0.210133	-0.176103		-62.0703	-0.00509084	-0.00956491
				-61.5625	-0.221433	-0.185222		-61.5625	-0.0053646	-0.0100602
				-61.0547	-0.233335	-0.194806		-61.0547	-0.00565294	-0.0105807
				-60.5469	-0.245871	-0.204879		-60.5469	-0.00595664	-0.0111279
				-60.0391	-0.259073	-0.215466		-60.0391	-0.0062765	-0.0117029
				-59.5312	-0.272978	-0.226592		-59.5312	-0.00661337	-0.0123072
				-59.0234	-0.287622	-0.238284		-59.0234	-0.00696813	-0.0129422
				-58.5156	-0.303043	-0.25057		-58.5156	-0.00734174	-0.0136095
				-58.0078	-0.319282	-0.26348		-58.0078	-0.00773517	-0.0143107
				-57.5	-0.336383	-0.277044		-57.5	-0.00814945	-0.0150474
				-56.9922	-0.354389	-0.291295		-56.9922	-0.00858568	-0.0158214
				-56.4844	-0.373348	-0.306266		-56.4844	-0.009045	-0.0166346
				-55.9766	-0.39331	-0.321993		-55.9766	-0.00952861	-0.0174888
				-55.4688	-0.414326	-0.338513		-55.4688	-0.0100378	-0.018386
				-54.9609	-0.436452	-0.355864		-54.9609	-0.0105738	-0.0193285
				-54.4531	-0.459744	-0.374088		-54.4531	-0.0111381	-0.0203183
				-53.9453	-0.484264	-0.393227		-53.9453	-0.0117321	-0.0213578
				-53.4375	-0.510074	-0.413324		-53.4375	-0.0123574	-0.0224494
				-52.9297	-0.53724	-0.434427		-52.9297	-0.0130156	-0.0235956
				-52.4219	-0.565834	-0.456584		-52.4219	-0.0137083	-0.024799
				-51.9141	-0.595927	-0.479845		-51.9141	-0.0144374	-0.0260624
				-51.4062	-0.627596	-0.504262		-51.4062	-0.0152046	-0.0273886
				-50.8984	-0.660923	-0.529893		-50.8984	-0.016012	-0.0287807
				-50.3906	-0.695991	-0.556793		-50.3906	-0.0168616	-0.0302417
				-49.8828	-0.732889	-0.585022		-49.8828	-0.0177555	-0.031775
				-49.375	-0.77171	-0.614645		-49.375	-0.018696	-0.0333839
				-48.8672	-0.81255	-0.645724		-48.8672	-0.0196854	-0.035072
				-48.3594	-0.855513	-0.678329		-48.3594	-0.0207263	-0.0368429
				-47.8516	-0.900705	-0.712531		-47.8516	-0.0218211	-0.0387005
				-47.3438	-0.948236	-0.748402		-47.3438	-0.0229727	-0.0406488
				-46.8359	-0.998226	-0.786019		-46.8359	-0.0241837	-0.042692
				-46.3281	-1.05079	-0.825463		-46.3281	-0.0254573	-0.0448343
				-45.8203	-1.10607	-0.866815		-45.8203	-0.0267965	-0.0470803
				-45.3125	-1.16419	-0.910162		-45.3125	-0.0282045	-0.0494347
				-44.8047	-1.22529	-0.955592		-44.8047	-0.0296847	-0.0519022
				-44.2969	-1.28952	-1.0032		-44.2969	-0.0312407	-0.0544879
				-43.7891	-1.35702	-1.05308		-43.7891	-0.0328762	-0.0571969
				-43.2812	-1.42797	-1.10532		-43.2812	-0.034595	-0.0600348
				-42.7734	-1.50252	-1.16005		-42.7734	-0.0364012	-0.063007
				-42.2656	-1.58086	-1.21735		-42.2656	-0.0382989	-0.0661192
				-41.7578	-1.66315	-1.27734		-41.7578	-0.0402926	-0.0693775
				-41.25	-1.74959	-1.34013		-41.25	-0.0423868	-0.0727879
				-40.7422	-1.84038	-1.40583		-40.7422	-0.0445863	-0.0763567
				-40.2344	-1.93571	-1.47458		-40.2344	-0.0468959	-0.0800904
				-39.7266	-2.03581	-1.54648		-39.7266	-0.0493209	-0.0839958
				-39.2188	-2.14088	-1.62167		-39.2188	-0.0518666	-0.0880795
				-38.7109	-2.25117	-1.70027		-38.7109	-0.0545384	-0.0923487
				-38.2031	-2.3669	-1.78242		-38.2031	-0.0573423	-0.0968105
				-37.6953	-2.48833	-1.86825		-37.6953	-0.0602841	-0.101472
				-37.1875	-2.6157	-1.95789		-37.1875	-0.0633699	-0.106341
				-36.6797	-2.74929	-2.05149		-36.6797	-0.0666063	-0.111425
				-36.1719	-2.88936	-2.14919		-36.1719	-0.0699997	-0.116732
				-35.6641	-3.0362	-2.25114		-35.6641	-0.073557	-0.122269
				-35.1562	-3.19008	-2.35747		-35.1562	-0.0772852	-0.128044
				-34.6484	-3.35132	-2.46833		-34.6484	-0.0811916	-0.134065
				-34.1406	-3.52022	-2.58387		-34.1406	-0.0852834	-0.140341
				-33.6328	-3.69709	-2.70424		-33.6328	-0.0895685	-0.146878
				-33.125	-3.88226	-2.82958		-33.125	-0.0940544	-0.153686
				-32.6172	-4.07605	-2.96003		-32.6172	-0.0987494	-0.160771
				-32.1094	-4.27881	-3.09573		-32.1094	-0.103661	-0.168142
				-31.6016	-4.49087	-3.23684		-31.6016	-0.108799	-0.175806
				-31.0938	-4.71258	-3.38347		-31.0938	-0.11417	-0.18377
				-30.5859	-4.9443	-3.53577		-30.5859	-0.119784	-0.192043
				-30.0781	-5.18638	-3.69386		-30.0781	-0.125649	-0.200629
				-29.5703	-5.43919	-3.85786		-29.5703	-0.131774	-0.209537
				-29.0625	-5.70308	-4.02789		-29.0625	-0.138167	-0.218771
				-28.5547	-5.97842	-4.20403		-28.5547	-0.144837	-0.228338
				-28.0469	-6.26557	-4.3864		-28.0469	-0.151794	-0.238243
				-27.5391	-6.5649	-4.57506		-27.5391	-0.159046	-0.24849
				-27.0312	-6.87674	-4.77009		-27.0312	-0.166601	-0.259083
				-26.5234	-7.20146	-4.97154		-26.5234	-0.174468	-0.270025
				-26.0156	-7.53939	-5.17945		-26.0156	-0.182655	-0.281317
				-25.5078	-7.89086	-5.39385		-25.5078	-0.19117	-0.292962
				-25	-8.25619	-5.61472		-25	-0.20002	-0.304959
				-24.4922	-8.63567	-5.84207		-24.4922	-0.209214	-0.317307
				-23.9844	-9.02959	-6.07584		-23.9844	-0.218757	-0.330004
				-23.4766	-9.4382	-6.31597		-23.4766	-0.228657	-0.343046
				-22.9688	-9.86174	-6.56237		-22.9688	-0.238917	-0.356429
				-22.4609	-10.3004	-6.81493		-22.4609	-0.249545	-0.370147
				-21.9531	-10.7544	-7.0735		-21.9531	-0.260543	-0.384191
				-21.4453	-11.2238	-7.33791		-21.4453	-0.271915	-0.398552
				-20.9375	-11.7087	-7.60795		-20.9375	-0.283664	-0.413219
				-20.4297	-12.2092	-7.88339		-20.4297	-0.29579	-0.42818
				-19.9219	-12.7254	-8.16397		-19.9219	-0.308294	-0.443419
				-19.4141	-13.257	-8.44937		-19.4141	-0.321174	-0.45892
				-18.9062	-13.8041	-8.73926		-18.9062	-0.334428	-0.474665
				-18.3984	-14.3665	-9.03328		-18.3984	-0.348053	-0.490635
				-17.8906	-14.9439	-9.33102		-17.8906	-0.362041	-0.506806
				-17.3828	-15.5361	-9.63205		-17.3828	-0.376388	-0.523156
				-16.875	-16.1426	-9.9359		-16.875	-0.391083	-0.539659
				-16.3672	-16.7631	-10.2421		-16.3672	-0.406116	-0.556288
				-15.8594	-17.3971	-10.55		-15.8594	-0.421474	-0.573015
				-15.3516	-18.0439	-10.8592		-15.3516	-0.437144	-0.589808
				-14.8438	-18.7029	-11.169		-14.8438	-0.453109	-0.606636
				-14.3359	-19.3733	-11.4789		-14.3359	-0.469351	-0.623466
				-13.8281	-20.0543	-11.7882		-13.8281	-0.48585	-0.640263
				-13.3203	-20.745	-12.0962		-13.3203	-0.502583	-0.656994
				-12.8125	-21.4444	-12.4023		-12.8125	-0.519526	-0.673621
				-12.3047	-22.1513	-12.7059		-12.3047	-0.536654	-0.690107
				-11.7969	-22.8648	-13.0061		-11.7969	-0.553938	-0.706417
				-11.2891	-23.5835	-13.3025		-11.2891	-0.57135	-0.722513
				-10.7812	-24.3061	-13.5942		-10.7812	-0.588857	-0.738356
				-10.2734	-25.0314	-13.8806		-10.2734	-0.606427	-0.753912
				-9.76562	-25.7578	-14.161		-9.76562	-0.624026	-0.769143
				-9.25781	-26.484	-14.4348		-9.25781	-0.641619	-0.784013
				-8.75	-27.2084	-14.7013		-8.75	-0.659169	-0.798488
				-8.24219	-27.9294	-14.9599		-8.24219	-0.676639	-0.812534
				-7.73438	-28.6457	-15.21		-7.73438	-0.693991	-0.82612
				-7.22656	-29.3555	-15.4511		-7.22656	-0.711186	-0.839213
				-6.71875	-30.0572	-15.6826		-6.71875	-0.728188	-0.851787
				-6.21094	-30.7494	-15.904		-6.21094	-0.744957	-0.863812
				-5.70312	-31.4304	-16.1149		-5.70312	-0.761456	-0.875265
				-5.19531	-32.0987	-16.3148		-5.19531	-0.777647	-0.886123
				-4.6875	-32.7529	-16.5033		-4.6875	-0.793494	-0.896364
				-4.17969	-33.3913	-16.6802		-4.17969	-0.808961	-0.905972
				-3.67188	-34.0127	-16.8452		-3.67188	-0.824015	-0.914929
				-3.16406	-34.6156	-16.9979		-3.16406	-0.838622	-0.923223
				-2.65625	-35.1989	-17.1381		-2.65625	-0.852753	-0.930843
				-2.14844	-35.7613	-17.2659		-2.14844	-0.866377	-0.937779
				-1.64062	-36.3016	-17.3809		-1.64062	-0.879469	-0.944026
				-1.13281	-36.819	-17.4831		-1.13281	-0.892003	-0.94958
				-0.625	-37.3124	-17.5726		-0.625	-0.903956	-0.954439
				-0.117188	-37.781	-17.6493		-0.117188	-0.91531	-0.958603
				0.390625	-38.2242	-17.7132		0.390625	-0.926045	-0.962075
				0.898438	-38.6411	-17.7645		0.898438	-0.936148	-0.96486
				1.40625	-39.0315	-17.8032		1.40625	-0.945605	-0.966964
				1.91406	-39.3948	-17.8295		1.91406	-0.954406	-0.968394
				2.42188	-39.7307	-17.8436		2.42188	-0.962543	-0.969161
				2.92969	-40.0389	-17.8457		2.92969	-0.970012	-0.969275
				3.4375	-40.3195	-17.836		3.4375	-0.976809	-0.968748
				3.94531	-40.5723	-17.8148		3.94531	-0.982933	-0.967595
				4.45312	-40.7974	-17.7823		4.45312	-0.988386	-0.965829
				4.96094	-40.9949	-17.7388		4.96094	-0.993171	-0.963466
				5.46875	-41.1651	-17.6846		5.46875	-0.997294	-0.960522
				5.97656	-41.3082	-17.62		5.97656	-1.00076	-0.957013
				6.48438	-41.4246	-17.5453		6.48438	-1.00358	-0.952957
				6.99219	-41.5148	-17.4609		6.99219	-1.00577	-0.948371
				7.5	-41.5792	-17.367		7.5	-1.00733	-0.943273
				8.00781	-41.6184	-17.264		8.00781	-1.00828	-0.937681
				8.51562	-41.6328	-17.1523		8.51562	-1.00863	-0.931614
				9.02344	-41.6232	-17.0322		9.02344	-1.00839	-0.925088
				9.53125	-41.5901	-16.904		9.53125	-1.00759	-0.918123
				10.0391	-41.5343	-16.768		10.0391	-1.00624	-0.910736
				10.5469	-41.4563	-16.6245		10.5469	-1.00435	-0.902945
				11.0547	-41.357	-16.4739		11.0547	-1.00194	-0.894767
				11.5625	-41.237	-16.3165		11.5625	-0.999038	-0.886219
				12.0703	-41.0971	-16.1527		12.0703	-0.995648	-0.877317
				12.5781	-40.938	-15.9826		12.5781	-0.991793	-0.868079
				13.0859	-40.7604	-15.8066		13.0859	-0.98749	-0.85852
				13.5938	-40.565	-15.625		13.5938	-0.982758	-0.848656
				14.1016	-40.3527	-15.438		14.1016	-0.977612	-0.838501
				14.6094	-40.124	-15.2459		14.6094	-0.972071	-0.82807
				15.1172	-39.8796	-15.0491		15.1172	-0.966152	-0.817377
				15.625	-39.6204	-14.8476		15.625	-0.959872	-0.806435
				16.1328	-39.3469	-14.6418		16.1328	-0.953245	-0.795257
				16.6406	-39.0598	-14.4319		16.6406	-0.94629	-0.783857
				17.1484	-38.7597	-14.2181		17.1484	-0.93902	-0.772245
				17.6562	-38.4473	-14.0007		17.6562	-0.931452	-0.760433
				18.1641	-38.1232	-13.7797		18.1641	-0.9236	-0.748433
				18.6719	-37.7879	-13.5555		18.6719	-0.915477	-0.736255
				19.1797	-37.4421	-13.3282		19.1797	-0.907098	-0.723908
				19.6875	-37.0862	-13.0979		19.6875	-0.898476	-0.711402
				20.1953	-36.7208	-12.8649		20.1953	-0.889623	-0.698747
				20.7031	-36.3463	-12.6293		20.7031	-0.880552	-0.685951
				21.2109	-35.9634	-12.3913		21.2109	-0.871274	-0.673022
				21.7188	-35.5723	-12.1509		21.7188	-0.861801	-0.659968
				22.2266	-35.1737	-11.9084		22.2266	-0.852142	-0.646796
				22.7344	-34.7678	-11.6639		22.7344	-0.842309	-0.633514
				23.2422	-34.3551	-11.4174		23.2422	-0.832311	-0.620128
				23.75	-33.936	-11.1692		23.75	-0.822158	-0.606645
				24.2578	-33.5108	-10.9193		24.2578	-0.811857	-0.593069
				24.7656	-33.08	-10.6677		24.7656	-0.801418	-0.579408
				25.2734	-32.6437	-10.4147		25.2734	-0.790849	-0.565666
				25.7812	-32.2024	-10.1603		25.7812	-0.780157	-0.551849
				26.2891	-31.7563	-9.90462		26.2891	-0.76935	-0.53796
				26.7969	-31.3057	-9.64769		26.7969	-0.758433	-0.524006
				27.3047	-30.8509	-9.38962		27.3047	-0.747415	-0.509989
				27.8125	-30.3921	-9.13047		27.8125	-0.7363	-0.495913
				28.3203	-29.9296	-8.87032		28.3203	-0.725095	-0.481783
				28.8281	-29.4636	-8.60923		28.8281	-0.713805	-0.467603
				29.3359	-28.9942	-8.34726		29.3359	-0.702435	-0.453374
				29.8438	-28.5219	-8.08448		29.8438	-0.690991	-0.439101
				30.3516	-28.0466	-7.82092		30.3516	-0.679476	-0.424786
				30.8594	-27.5686	-7.55665		30.8594	-0.667895	-0.410433
				31.3672	-27.088	-7.29171		31.3672	-0.656253	-0.396043
				31.875	-26.605	-7.02614		31.875	-0.644553	-0.381619
				32.3828	-26.1199	-6.76		32.3828	-0.632798	-0.367163
				32.8906	-25.6326	-6.49331		32.8906	-0.620993	-0.352678
				33.3984	-25.1433	-6.22611		33.3984	-0.60914	-0.338166
				33.9062	-24.6522	-5.95844		33.9062	-0.597242	-0.323627
				34.4141	-24.1594	-5.69033		34.4141	-0.585303	-0.309065
				34.9219	-23.665	-5.42181		34.9219	-0.573324	-0.294481
				35.4297	-23.169	-5.15291		35.4297	-0.56131	-0.279876
				35.9375	-22.6717	-4.88366		35.9375	-0.549261	-0.265251
				36.4453	-22.173	-4.61407		36.4453	-0.53718	-0.250609
				36.9531	-21.6731	-4.34418		36.9531	-0.525069	-0.23595
				37.4609	-21.1721	-4.074		37.4609	-0.51293	-0.221276
				37.9688	-20.67	-3.80356		37.9688	-0.500765	-0.206587
				38.4766	-20.1668	-3.53288		38.4766	-0.488576	-0.191885
				38.9844	-19.6628	-3.26196		38.9844	-0.476364	-0.17717
				39.4922	-19.1578	-2.99083		39.4922	-0.464131	-0.162444
				40	-18.6521	-2.71951		40	-0.451878	-0.147708

## Sheet: Fig.S2c
Supplementary Figure S2
Supplementary Figure S2 c
CaV1.4 + β2x13 + α2δ-4
	Vhalf (mV)
	n1	n2	n3	n4	n5	n6	n7	n8	n9	n10	n11	n12	n13	n14
Vehicle	-0.674454	-10.4292	-3.45936	-4.44271	-4.35831e-09	-1.86201	-2.26385	-4.9133	-5.04748	-1.4502	-1.50256	-1.02641	-1.52629	-1.53883
5 µM ML218	-1.0308e-07	-15.6291	-22.9065	-10.5017	-5.13412	-5.1054	-6.36975	-7.4327	-9.01652	-1.15106	-4.32311	-4.18392	-0.688451	-4.11938

## Sheet: Fig.S2d
Supplementary Figure S2
Supplementary Figure S2 d
CaV1.4 + β2x13 + α2δ-4
	ICa (pA)
	n1	n2	n3	n4	n5	n6	n7	n8	n9	n10	n11	n12	n13	n14
Vehicle	-14.4526	-114.221	-46.5735	-35.6674	-85.3569	-82.19	-65.1595	-50.6063	-41.2768	-94.5517	-87.576	-37.8238	-118.972	-447.709
5 µM ML218	-4.33578	-57.0715	-18.9307	-23.2807	-47.3849	-50.9416	-33.5713	-25.5733	-18.4114	-34.2962	-45.387	-21.7311	-60.8497	-220.844

## Sheet: Fig.S2e
Supplementary Figure S2
Supplementary Figure S2 e
CaV3.2
Time (ms)	Vehicle	1 μM ML218
0	-2.27814	-7.81421
0.01	-2.11621	-7.42807
0.02	-1.92564	-7.04443
0.03	-1.71762	-6.65954
0.04	-1.50587	-6.29707
0.05	-1.28416	-5.95079
0.06	-1.07988	-5.62445
0.07	-0.878091	-5.32052
0.08	-0.685024	-5.02905
0.09	-0.49943	-4.76
0.1	-0.310099	-4.51462
0.11	-0.12326	-4.30536
0.12	0.0623342	-4.12849
0.13	0.247928	-3.97652
0.14	0.437259	-3.84325
0.15	0.635309	-3.71121
0.16	0.849551	-3.57669
0.17	1.0912	-3.43842
0.18	1.3453	-3.28397
0.19	1.62805	-3.12703
0.2	1.9108	-2.96759
0.21	2.18608	-2.81687
0.22	2.44018	-2.69231
0.23	2.66937	-2.59391
0.24	2.86742	-2.52167
0.25	3.03682	-2.4706
0.26	3.17383	-2.42949
0.27	3.31209	-2.36348
0.28	3.44413	-2.27628
0.29	3.54253	-2.17913
0.3	3.59858	-2.0608
0.31	3.59983	-1.93748
0.32	3.54378	-1.79548
0.33	3.43416	-1.63605
0.34	3.28345	-1.4654
0.35	3.11778	-1.29226
0.36	2.94464	-1.10667
0.37	2.79766	-0.937268
0.38	2.67061	-0.771604
0.39	2.56847	-0.614658
0.4	2.49623	-0.487608
0.41	2.45637	-0.402907
0.42	2.419	-0.361803
0.43	2.38786	-0.391697
0.44	2.36046	-0.488853
0.45	2.32807	-0.64829
0.46	2.29818	-0.873743
0.47	2.26455	-1.15151
0.48	2.20351	-1.46291
0.49	2.13999	-1.81417
0.5	2.06276	-2.20155
0.51	1.98304	-2.59765
0.52	1.90955	-2.98752
0.53	1.8672	-3.37988
0.54	1.8672	-3.73612
0.55	1.90208	-4.05873
0.56	1.98554	-4.3639
0.57	2.08767	-4.64292
0.58	2.21472	-4.89577
0.59	2.33804	-5.11749
0.6	2.43769	-5.30059
0.61	2.51118	-5.43636
0.62	2.55104	-5.5248
0.63	2.55602	-5.59081
0.64	2.51865	-5.63192
0.65	2.4352	-5.66306
0.66	2.31188	-5.68673
0.67	2.15244	-5.69046
0.68	1.9818	-5.6805
0.69	1.79247	-5.64438
0.7	1.61559	-5.57711
0.71	1.47235	-5.47747
0.72	1.37519	-5.33173
0.73	1.31291	-5.15859
0.74	1.29423	-4.96428
0.75	1.31416	-4.77744
0.76	1.36025	-4.61676
0.77	1.42128	-4.48846
0.78	1.48356	-4.39131
0.79	1.5558	-4.32653
0.8	1.62805	-4.30038
0.81	1.68161	-4.29913
0.82	1.71275	-4.32778
0.83	1.71275	-4.38134
0.84	1.67164	-4.45483
0.85	1.58694	-4.56195
0.86	1.46612	-4.69523
0.87	1.32537	-4.83972
0.88	1.18462	-4.99293
0.89	1.04137	-5.13243
0.9	0.905604	-5.23582
0.91	0.778553	-5.29934
0.92	0.691361	-5.32301
0.93	0.658975	-5.30433
0.94	0.675168	-5.25326
0.95	0.743676	-5.17728
0.96	0.857025	-5.07514
0.97	1.02144	-4.97051
0.98	1.22572	-4.84844
0.99	1.44121	-4.7189
1	1.62929	-4.5632
1.01	1.77627	-4.38134
1.02	1.85973	-4.16959
1.03	1.86222	-3.92794
1.04	1.79122	-3.67509
1.05	1.64798	-3.42348
1.06	1.4437	-3.16315
1.07	1.21451	-2.91278
1.08	0.964146	-2.68484
1.09	0.729974	-2.46562
1.1	0.531924	-2.2713
1.11	0.391172	-2.08197
1.12	0.30398	-1.91132
1.13	0.282805	-1.71826
1.14	0.317682	-1.52519
1.15	0.407365	-1.33088
1.16	0.521959	-1.13283
1.17	0.636554	-0.967163
1.18	0.726237	-0.840112
1.19	0.777307	-0.756657
1.2	0.791008	-0.740464
1.21	0.743676	-0.774095
1.22	0.64901	-0.860041
1.23	0.528188	-0.985846
1.24	0.391172	-1.12909
1.25	0.242946	-1.26361
1.26	0.118386	-1.36949
1.27	0.0137564	-1.44049
1.28	-0.0510147	-1.46914
1.29	-0.0834002	-1.45045
1.3	-0.093365	-1.39067
1.31	-0.0510147	-1.29849
1.32	0.0311948	-1.16023
1.33	0.163228	-1.00079
1.34	0.347576	-0.8152
1.35	0.584239	-0.607185
1.36	0.865744	-0.382978
1.37	1.16593	-0.157525
1.38	1.47609	0.055472
1.39	1.78126	0.238575
1.4	2.05155	0.393029
1.41	2.30067	0.508869
1.42	2.50993	0.617236
1.43	2.67933	0.728094
1.44	2.82258	0.848917
1.45	2.95461	0.984687
1.46	3.0854	1.12668
1.47	3.20124	1.27989
1.48	3.29839	1.4194
1.49	3.38558	1.5477
1.5	3.4653	1.64485
1.51	3.53879	1.69094
1.52	3.61976	1.68969
1.53	3.71691	1.64361
1.54	3.81781	1.56513
1.55	3.92991	1.45428
1.56	4.04451	1.34591
1.57	4.13543	1.24502
1.58	4.19647	1.16779
1.59	4.21764	1.11672
1.6	4.19398	1.11049
1.61	4.118	1.13789
1.62	4.01212	1.19395
1.63	3.87635	1.25498
1.64	3.71442	1.32723
1.65	3.54253	1.38577
1.66	3.36815	1.42936
1.67	3.19501	1.47047
1.68	3.04678	1.51531
1.69	2.92721	1.57136
1.7	2.84251	1.65357
1.71	2.8014	1.76443
1.72	2.81759	1.89273
1.73	2.8724	2.03971
1.74	2.95461	2.18669
1.75	3.05924	2.31374
1.76	3.1539	2.41214
1.77	3.24857	2.47816
1.78	3.31334	2.51054
1.79	3.36815	2.49933
1.8	3.41797	2.46321
1.81	3.44662	2.40093
1.82	3.47527	2.30253
1.83	3.50018	2.18793
1.84	3.49769	2.05092
1.85	3.46157	1.9002
1.86	3.3968	1.73454
1.87	3.29341	1.57136
1.88	3.14145	1.42065
1.89	2.94589	1.28488
1.9	2.73414	1.1653
1.91	2.50495	1.07935
1.92	2.26829	0.998388
1.93	2.01792	0.914933
1.94	1.75261	0.830233
1.95	1.4711	0.74055
1.96	1.17091	0.657095
1.97	0.863252	0.583605
1.98	0.559327	0.530044
1.99	0.262875	0.486448
2	-0.00866435	0.446589
2.01	-0.255292	0.416695
2.02	-0.477008	0.386801
2.03	-0.675058	0.35317
2.04	-0.836986	0.314556
2.05	-0.949089	0.279679
2.06	-1.00639	0.224873
2.07	-0.992685	0.161348
2.08	-0.910476	0.0816295
2.09	-0.774706	-0.0130357
2.1	-0.609042	-0.125139
2.11	-0.433412	-0.260909
2.12	-0.268994	-0.401662
2.13	-0.134469	-0.548642
2.14	-0.0273482	-0.709324
2.15	0.0548612	-0.863778
2.16	0.122123	-1.02321
2.17	0.201841	-1.17019
2.18	0.28156	-1.3234
2.19	0.384944	-1.47287
2.2	0.504521	-1.6074
2.21	0.640291	-1.73196
2.22	0.776061	-1.82413
2.23	0.923041	-1.88143
2.24	1.07376	-1.90385
2.25	1.25063	-1.89389
2.26	1.4437	-1.85278
2.27	1.6405	-1.79175
2.28	1.84354	-1.71327
2.29	2.03287	-1.61736
2.3	2.20227	-1.51024
2.31	2.36171	-1.39191
2.32	2.50495	-1.25614
2.33	2.62826	-1.11663
2.34	2.76154	-0.979618
2.35	2.8998	-0.831392
2.36	3.0555	-0.673202
2.37	3.21867	-0.506292
2.38	3.37313	-0.318207
2.39	3.54128	-0.108947
2.4	3.69449	0.127717
2.41	3.80784	0.390537
2.42	3.89877	0.684498
2.43	3.96603	1.00337
2.44	4.02707	1.33968
2.45	4.08686	1.67599
2.46	4.15536	1.99985
2.47	4.22885	2.30253
2.48	4.32726	2.56286
2.49	4.4269	2.78582
2.5	4.53278	2.97889
2.51	4.64115	3.15202
2.52	4.76197	3.30025
2.53	4.89026	3.44349
2.54	5.02728	3.56307
2.55	5.15682	3.67144
2.56	5.26519	3.75987
2.57	5.32498	3.83835
2.58	5.3337	3.88568
2.59	5.28263	3.90436
2.6	5.18422	3.88693
2.61	5.05219	3.83586
2.62	4.89026	3.74991
2.63	4.7109	3.64528
2.64	4.53278	3.54812
2.65	4.34843	3.4547
2.66	4.16906	3.38869
2.67	3.97101	3.33263
2.68	3.77047	3.30772
2.69	3.54751	3.31021
2.7	3.29964	3.3289
2.71	3.03308	3.34758
2.72	2.7304	3.36004
2.73	2.40655	3.37249
2.74	2.05155	3.37872
2.75	1.64798	3.39367
2.76	1.21077	3.40612
2.77	0.747413	3.41858
2.78	0.269104	3.42232
2.79	-0.20796	3.41484
2.8	-0.661356	3.37623
2.81	-1.06618	3.30399
2.82	-1.41743	3.19437
2.83	-1.7089	3.05985
2.84	-1.93186	2.92408
2.85	-2.10127	2.78582
2.86	-2.22832	2.64008
2.87	-2.32298	2.50431
2.88	-2.3591	2.35858
2.89	-2.36409	2.21035
2.9	-2.33917	2.0696
2.91	-2.26693	1.92636
2.92	-2.1897	1.76817
2.93	-2.09005	1.6025
2.94	-2.00162	1.42687
2.95	-1.92813	1.23131
2.96	-1.87457	1.02205
2.97	-1.83471	0.790374
2.98	-1.81602	0.571149
2.99	-1.81104	0.350678
3	-1.84094	0.142664
3.01	-1.91193	-0.0578772
3.02	-2.04521	-0.237243
3.03	-2.23081	-0.415363
3.04	-2.45875	-0.553624
3.05	-2.72033	-0.669465
3.06	-2.9819	-0.744201
3.07	-3.20735	-0.802744
3.08	-3.38921	-0.817691
3.09	-3.50381	-0.811463
3.1	-3.55238	-0.771604
3.11	-3.53246	-0.694377
3.12	-3.4353	-0.577291
3.13	-3.27462	-0.426574
3.14	-3.07158	-0.259664
3.15	-2.83617	-0.0753155
3.16	-2.59078	0.109033
3.17	-2.32672	0.287153
3.18	-2.06016	0.455308
3.19	-1.79485	0.60478
3.2	-1.5258	0.718129
3.21	-1.28665	0.809058
3.22	-1.0587	0.858881
3.23	-0.871862	0.87632
3.24	-0.713672	0.858881
3.25	-0.590358	0.819022
3.26	-0.475763	0.780409
3.27	-0.363659	0.755497
3.28	-0.236609	0.756743
3.29	-0.074681	0.790374
3.3	0.115895	0.866355
3.31	0.326401	0.99216
3.32	0.558082	1.15907
3.33	0.793499	1.35712
3.34	1.00525	1.57634
3.35	1.20455	1.78934
3.36	1.37519	1.99736
3.37	1.52466	2.16676
3.38	1.62431	2.29007
3.39	1.67414	2.35733
3.4	1.67663	2.34986
3.41	1.62182	2.27388
3.42	1.53837	2.16551
3.43	1.40135	2.02102
3.44	1.22323	1.86781
3.45	1.01397	1.73454
3.46	0.769833	1.6187
3.47	0.503276	1.54271
3.48	0.224262	1.47545
3.49	-0.0422952	1.4331
3.5	-0.275222	1.40819
3.51	-0.457079	1.39698
3.52	-0.591603	1.392
3.53	-0.665094	1.41317
3.54	-0.69997	1.44805
3.55	-0.697479	1.50535
3.56	-0.666339	1.58631
3.57	-0.627726	1.68969
3.58	-0.572919	1.80678
3.59	-0.508148	1.93383
3.6	-0.415974	2.04718
3.61	-0.298888	2.12067
3.62	-0.183048	2.15679
3.63	-0.0746809	2.13188
3.64	0.027458	2.07085
3.65	0.117141	1.97369
3.66	0.190631	1.85785
3.67	0.240455	1.74325
3.68	0.249174	1.62991
3.69	0.218034	1.5178
3.7	0.143298	1.42812
3.71	0.0598434	1.36086
3.72	-0.0435412	1.34466
3.73	-0.148171	1.3621
3.74	-0.231626	1.43186
3.75	-0.293906	1.53898
3.76	-0.342484	1.65855
3.77	-0.382343	1.77439
3.78	-0.430921	1.86408
3.79	-0.510639	1.92636
3.8	-0.633953	1.95002
3.81	-0.808337	1.92885
3.82	-1.03628	1.87529
3.83	-1.30658	1.7881
3.84	-1.59929	1.66603
3.85	-1.91193	1.52652
3.86	-2.22458	1.38951
3.87	-2.531	1.26868
3.88	-2.7988	1.17402
3.89	-3.02301	1.11298
3.9	-3.18369	1.08309
3.91	-3.27337	1.08932
3.92	-3.29953	1.09928
3.93	-3.25967	1.12668
3.94	-3.15006	1.15782
3.95	-2.98688	1.17526
3.96	-2.77638	1.17651
3.97	-2.53847	1.14537
3.98	-2.29932	1.09181
3.99	-2.07635	1.01707
4	-1.8808	0.926143
4.01	-1.71638	0.824004
4.02	-1.56815	0.716883
4.03	-1.44982	0.603534
4.04	-1.35017	0.48022
4.05	-1.30159	0.349432
4.06	-1.2991	0.221136
4.07	-1.33896	0.0990676
4.08	-1.43861	-0.00929936
4.09	-1.5831	-0.100228
4.1	-1.78488	-0.171227
4.11	-2.04023	-0.208595
4.12	-2.31302	-0.223542
4.13	-2.58829	-0.217314
4.14	-2.85485	-0.216068
4.15	-3.1102	-0.204858
4.16	-3.33814	-0.217314
4.17	-3.53121	-0.245962
4.18	-3.66698	-0.293295
4.19	-3.75043	-0.35682
4.2	-3.78656	-0.435293
4.21	-3.78157	-0.532449
4.22	-3.733	-0.650781
4.23	-3.65452	-0.791533
4.24	-3.55363	-0.959689
4.25	-3.4216	-1.14404
4.26	-3.26839	-1.34084
4.27	-3.09774	-1.5364
4.28	-2.90841	-1.72199
4.29	-2.70787	-1.89139
4.3	-2.48117	-2.03713
4.31	-2.26693	-2.15671
4.32	-2.07262	-2.24888
4.33	-1.90446	-2.30742
4.34	-1.77367	-2.3423
4.35	-1.66904	-2.356
4.36	-1.59804	-2.36223
4.37	-1.52331	-2.35351
4.38	-1.46352	-2.33358
4.39	-1.39626	-2.29995
4.4	-1.33398	-2.2576
4.41	-1.26921	-2.2165
4.42	-1.20817	-2.1729
4.43	-1.13842	-2.13179
4.44	-1.07365	-2.10688
4.45	-1.01884	-2.09194
4.46	-0.982721	-2.07076
4.47	-0.957809	-2.02966
4.48	-0.944107	-1.95367
4.49	-0.94037	-1.85029
4.5	-0.936634	-1.7195
4.51	-0.944107	-1.57252
4.52	-0.966528	-1.41931
4.53	-1.01635	-1.27233
4.54	-1.08237	-1.14777
4.55	-1.15212	-1.0556
4.56	-1.22561	-1.01699
4.57	-1.29038	-1.03193
4.58	-1.329	-1.10791
4.59	-1.35017	-1.22749
4.6	-1.34145	-1.38319
4.61	-1.29786	-1.56007
4.62	-1.2281	-1.74068
4.63	-1.14091	-1.89638
4.64	-1.02258	-2.01222
4.65	-0.880581	-2.08446
4.66	-0.704952	-2.08322
4.67	-0.504412	-2.02592
4.68	-0.282696	-1.90759
4.69	-0.04105	-1.73819
4.7	0.204332	-1.53889
4.71	0.444733	-1.32091
4.72	0.65773	-1.10916
4.73	0.850797	-0.908619
4.74	0.992795	-0.735481
4.75	1.08372	-0.603448
4.76	1.10739	-0.510028
4.77	1.07874	-0.457713
4.78	0.984076	-0.435293
4.79	0.84706	-0.434047
4.8	0.663958	-0.447749
4.81	0.475873	-0.456468
4.82	0.307717	-0.47017
4.83	0.174438	-0.493836
4.84	0.0959656	-0.522484
4.85	0.0635804	-0.55487
4.86	0.092229	-0.599711
4.87	0.142053	-0.664482
4.88	0.211806	-0.750428
4.89	0.28156	-0.855058
4.9	0.337612	-0.978372
4.91	0.391172	-1.10044
4.92	0.457189	-1.22874
4.93	0.525697	-1.35952
4.94	0.604169	-1.47786
4.95	0.692606	-1.5638
4.96	0.797237	-1.63854
4.97	0.901867	-1.68961
4.98	1.01522	-1.72947
4.99	1.12607	-1.74691
5	1.23195	-1.74815
5.01	1.34032	-1.71701
5.02	1.44495	-1.66345
5.03	1.56826	-1.59121
5.04	1.68908	-1.50651
5.05	1.81489	-1.40561
5.06	1.9382	-1.30347
5.07	2.04657	-1.19262
5.08	2.12878	-1.07428
5.09	2.17237	-0.947233
5.1	2.17736	-0.813954
5.11	2.1238	-0.680675
5.12	2.01792	-0.563589
5.13	1.8672	-0.471415
5.14	1.65421	-0.416609
5.15	1.40384	-0.409135
5.16	1.11735	-0.453977
5.17	0.7935	-0.544905
5.18	0.445978	-0.685658
5.19	0.0909834	-0.871251
5.2	-0.244082	-1.06681
5.21	-0.549253	-1.26611
5.22	-0.802109	-1.44921
5.23	-0.990194	-1.59993
5.24	-1.08984	-1.71826
5.25	-1.08361	-1.79424
5.26	-0.967773	-1.82289
5.27	-0.752285	-1.81417
5.28	-0.444623	-1.7631
5.29	-0.0821544	-1.68338
5.3	0.306472	-1.58124
5.31	0.695097	-1.48408
5.32	1.04013	-1.40561
5.33	1.33035	-1.35081
5.34	1.54335	-1.32091
5.35	1.68036	-1.32839
5.36	1.73891	-1.34831
5.37	1.73392	-1.36949
5.38	1.67414	-1.36949
5.39	1.55207	-1.3533
5.4	1.39388	-1.30223
5.41	1.16842	-1.23746
5.42	0.871972	-1.14653
5.43	0.516977	-1.04937
5.44	0.108422	-0.947233
5.45	-0.337502	-0.863778
5.46	-0.805846	-0.781568
5.47	-1.27544	-0.724271
5.48	-1.73506	-0.678184
5.49	-2.14984	-0.653272
5.5	-2.50858	-0.640816
5.51	-2.80254	-0.655763
5.52	-3.02923	-0.675693
5.53	-3.20486	-0.698114
5.54	-3.34063	-0.719289
5.55	-3.43779	-0.742955
5.56	-3.49633	-0.757902
5.57	-3.52249	-0.760393
5.58	-3.51253	-0.754165
5.59	-3.46893	-0.765376
5.6	-3.41163	-0.789042
5.61	-3.33191	-0.816445
5.62	-3.24971	-0.848831
5.63	-3.16625	-0.887444
5.64	-3.08902	-0.93104
5.65	-3.01553	-0.968408
5.66	-2.95201	-1.01076
5.67	-2.88475	-1.04813
5.68	-2.80378	-1.07055
5.69	-2.70787	-1.0693
5.7	-2.61071	-1.06556
5.71	-2.50982	-1.04813
5.72	-2.40893	-1.01823
5.73	-2.32298	-0.985846
5.74	-2.26568	-0.937268
5.75	-2.26818	-0.866269
5.76	-2.32049	-0.781568
5.77	-2.42512	-0.67943
5.78	-2.56961	-0.576045
5.79	-2.73901	-0.48138
5.8	-2.90966	-0.395434
5.81	-3.07283	-0.320698
5.82	-3.2223	-0.245962
5.83	-3.3643	-0.168735
5.84	-3.51003	-0.0815434
5.85	-3.66823	0.0143674
5.86	-3.86005	0.111524
5.87	-4.08176	0.207435
5.88	-4.34209	0.278434
5.89	-4.59495	0.318293
5.9	-4.84282	0.334486
5.91	-5.04336	0.327012
5.92	-5.19159	0.294626
5.93	-5.28625	0.267223
5.94	-5.32985	0.226119
5.95	-5.31615	0.183768
5.96	-5.24889	0.132699
5.97	-5.12308	0.082875
5.98	-4.93001	0.0118761
5.99	-4.69335	-0.0665965
6	-4.42056	-0.150051
6.01	-4.1266	-0.238489
6.02	-3.80773	-0.324435
6.03	-3.47516	-0.410381
6.04	-3.12888	-0.490099
6.05	-2.78012	-0.562344
6.06	-2.44131	-0.620887
6.07	-2.12991	-0.665728
6.08	-1.86585	-0.709324
6.09	-1.64911	-0.726762
6.1	-1.47348	-0.714306
6.11	-1.33522	-0.665728
6.12	-1.21191	-0.587256
6.13	-1.08486	-0.467678
6.14	-0.922931	-0.31447
6.15	-0.73111	-0.141332
6.16	-0.514376	0.0455073
6.17	-0.280204	0.238575
6.18	-0.0559967	0.407976
6.19	0.140807	0.532535
6.2	0.310208	0.61599
6.21	0.445978	0.643393
6.22	0.546872	0.619727
6.23	0.624099	0.547483
6.24	0.683887	0.431642
6.25	0.729975	0.27096
6.26	0.757377	0.067928
6.27	0.746167	-0.155033
6.28	0.691361	-0.401662
6.29	0.587976	-0.655763
6.3	0.42854	-0.916093
6.31	0.223016	-1.17642
6.32	-0.00617313	-1.43302
6.33	-0.229135	-1.67466
6.34	-0.42843	-1.90011
6.35	-0.579147	-2.0882
6.36	-0.662602	-2.24141
6.37	-0.675058	-2.36098
6.38	-0.620252	-2.44195
6.39	-0.513131	-2.46561
6.4	-0.368642	-2.44818
6.41	-0.210451	-2.38839
6.42	-0.0385583	-2.28999
6.43	0.139562	-2.18286
6.44	0.336366	-2.06204
6.45	0.536907	-1.93624
6.46	0.737448	-1.82662
6.47	0.945463	-1.7494
6.48	1.13355	-1.70206
6.49	1.3017	-1.68712
6.5	1.44121	-1.7195
6.51	1.55331	-1.78676
6.52	1.61933	-1.88766
6.53	1.63801	-2.02094
6.54	1.61061	-2.16916
6.55	1.52965	-2.3149
6.56	1.40384	-2.45814
6.57	1.24939	-2.60014
6.58	1.07999	-2.711
6.59	0.933006	-2.80193
6.6	0.81592	-2.8667
6.61	0.728729	-2.93147
6.62	0.678905	-2.9925
6.63	0.653993	-3.0772
6.64	0.646519	-3.19429
6.65	0.616625	-3.35746
6.66	0.566801	-3.56548
6.67	0.483346	-3.81958
6.68	0.374979	-4.10108
6.69	0.241701	-4.39006
6.7	0.0884925	-4.66658
6.71	-0.085891	-4.91944
6.72	-0.278958	-5.16108
6.73	-0.494447	-5.37657
6.74	-0.726127	-5.57836
6.75	-0.957808	-5.77018
6.76	-1.18326	-5.9346
6.77	-1.38007	-6.08407
6.78	-1.52705	-6.20988
6.79	-1.62047	-6.31824
6.8	-1.66032	-6.40668
6.81	-1.63915	-6.46772
6.82	-1.56566	-6.51754
6.83	-1.46726	-6.55242
6.84	-1.33647	-6.56985
6.85	-1.20817	-6.59352
6.86	-1.07739	-6.62715
6.87	-0.964036	-6.66203
6.88	-0.853178	-6.69317
6.89	-0.761004	-6.73801
6.9	-0.685023	-6.80901
6.91	-0.623989	-6.89745
6.92	-0.582884	-7.01951
6.93	-0.549253	-7.17397
6.94	-0.523095	-7.34337
6.95	-0.504411	-7.53768
6.96	-0.485728	-7.73573
6.97	-0.481991	-7.92382
6.98	-0.486973	-8.08076
6.99	-0.513131	-8.20781
7	-0.550499	-8.295
7.01	-0.609042	-8.34607
7.02	-0.655129	-8.37223
7.03	-0.692497	-8.36351
7.04	-0.696233	-8.33984
7.05	-0.655129	-8.31369
7.06	-0.565446	-8.27757
7.07	-0.408501	-8.2402
7.08	-0.191767	-8.20781
7.09	0.0598433	-8.17418
7.1	0.336366	-8.13806
7.11	0.615379	-8.10069
7.12	0.865744	-8.04588
7.13	1.06255	-7.98111
7.14	1.19334	-7.88769
7.15	1.28426	-7.76313
7.16	1.32039	-7.59996
7.17	1.31416	-7.40067
7.18	1.27679	-7.17521
7.19	1.21077	-6.93481
7.2	1.12981	-6.68445
7.21	1.04262	-6.43159
7.22	0.970374	-6.15881
7.23	0.923041	-5.88478
7.24	0.908094	-5.60203
7.25	0.928024	-5.29935
7.26	0.996532	-4.99542
7.27	1.10365	-4.7052
7.28	1.23569	-4.43739
7.29	1.37021	-4.20198
7.3	1.50598	-4.00393
7.31	1.6131	-3.84449
7.32	1.69033	-3.70747
7.33	1.72894	-3.60409
7.34	1.74513	-3.52935
7.35	1.75635	-3.46956
7.36	1.77254	-3.416
7.37	1.82112	-3.37864
7.38	1.91703	-3.35372
7.39	2.0665	-3.3313
7.4	2.26081	-3.29269
7.41	2.4763	-3.24038
7.42	2.69428	-3.16315
7.43	2.87614	-3.06475
7.44	3.0007	-2.95015
7.45	3.05052	-2.82559
7.46	3.01689	-2.70228
7.47	2.90229	-2.56651
7.48	2.71545	-2.42825
7.49	2.48128	-2.28127
7.5	2.20601	-2.11934
7.51	1.92201	-1.93624
7.52	1.62556	-1.73943
7.53	1.3316	-1.52519
7.54	1.03265	-1.29351
7.55	0.737448	-1.05934
7.56	0.455943	-0.830147
7.57	0.164474	-0.613413
7.58	-0.118277	-0.427819
7.59	-0.382343	-0.28333
7.6	-0.62648	-0.204858
7.61	-0.840722	-0.186174
7.62	-1.02756	-0.235998
7.63	-1.18326	-0.338136
7.64	-1.31405	-0.483871
7.65	-1.42615	-0.668219
7.66	-1.49591	-0.877479
7.67	-1.51584	-1.09795
7.68	-1.48594	-1.31842
7.69	-1.39875	-1.52519
7.7	-1.27045	-1.72573
7.71	-1.10603	-1.91631
7.72	-0.922932	-2.10439
7.73	-0.743566	-2.29248
7.74	-0.591603	-2.47184
7.75	-0.484482	-2.65495
7.76	-0.420957	-2.82185
7.77	-0.410992	-2.96385
7.78	-0.432167	-3.06848
7.79	-0.473272	-3.11955
7.8	-0.509394	-3.1071
7.81	-0.526832	-3.03112
7.82	-0.509394	-2.89659
7.83	-0.424694	-2.70103
7.84	-0.305116	-2.46935
7.85	-0.141943	-2.21276
7.86	0.042405	-1.95243
7.87	0.244191	-1.69334
7.88	0.442241	-1.46166
7.89	0.62659	-1.27981
7.9	0.803464	-1.14777
7.91	0.984076	-1.08425
7.92	1.17465	-1.08051
7.93	1.38889	-1.10667
7.94	1.61933	-1.16895
7.95	1.85848	-1.22874
7.96	2.09888	-1.27233
7.97	2.34178	-1.29475
7.98	2.57719	-1.30347
7.99	2.81386	-1.296
8	3.05799	-1.28604
8.01	3.31957	-1.26361
8.02	3.60232	-1.24244
8.03	3.90998	-1.22251
8.04	4.24006	-1.20383
8.05	4.57264	-1.18888
8.06	4.87532	-1.17891
8.07	5.13316	-1.17642
8.08	5.33868	-1.18016
8.09	5.47694	-1.19012
8.1	5.56787	-1.19386
8.11	5.62268	-1.20383
8.12	5.66503	-1.20756
8.13	5.71111	-1.21504
8.14	5.74973	-1.23123
8.15	5.78211	-1.24742
8.16	5.78709	-1.27856
8.17	5.74973	-1.33088
8.18	5.65382	-1.41558
8.19	5.51431	-1.52021
8.2	5.34117	-1.6485
8.21	5.14686	-1.7905
8.22	4.94009	-1.93873
8.23	4.7383	-2.06702
8.24	4.57762	-2.19283
8.25	4.45057	-2.29621
8.26	4.34968	-2.3996
8.27	4.28864	-2.5117
8.28	4.25626	-2.61509
8.29	4.27743	-2.73217
8.3	4.33473	-2.8505
8.31	4.44559	-2.97382
8.32	4.5826	-3.08966
8.33	4.72585	-3.20924
8.34	4.87781	-3.32881
8.35	5.01358	-3.42971
8.36	5.13316	-3.52313
8.37	5.21038	-3.60533
8.38	5.25149	-3.67882
8.39	5.23779	-3.73239
8.4	5.16554	-3.77847
8.41	5.05468	-3.80961
8.42	4.91144	-3.81958
8.43	4.74702	-3.8283
8.44	4.57762	-3.8283
8.45	4.43562	-3.83826
8.46	4.32103	-3.84823
8.47	4.2301	-3.86691
8.48	4.16782	-3.89182
8.49	4.12049	-3.92421
8.5	4.07315	-3.96157
8.51	3.99842	-4.02635
8.52	3.88507	-4.09236
8.53	3.72812	-4.18329
8.54	3.51388	-4.29415
8.55	3.26352	-4.40625
8.56	2.98201	-4.5196
8.57	2.69802	-4.62174
8.58	2.41527	-4.71018
8.59	2.14123	-4.78242
8.6	1.87094	-4.831
8.61	1.60065	-4.84346
8.62	1.33533	-4.83972
8.63	1.07625	-4.79612
8.64	0.853288	-4.70644
8.65	0.676413	-4.58686
8.66	0.556836	-4.43116
8.67	0.510749	-4.25927
8.68	0.545626	-4.055
8.69	0.641537	-3.84449
8.7	0.78478	-3.64395
8.71	0.971621	-3.43842
8.72	1.18586	-3.24287
8.73	1.42875	-3.06599
8.74	1.6841	-2.88538
8.75	1.9681	-2.71224
8.76	2.27576	-2.5416
8.77	2.58342	-2.36098
8.78	2.87863	-2.19906
8.79	3.1128	-2.05208
8.8	3.26352	-1.94122
8.81	3.2959	-1.85776
8.82	3.21245	-1.82662
8.83	3.01689	-1.82164
8.84	2.72916	-1.84282
8.85	2.38662	-1.88766
8.86	2.01418	-1.92876
8.87	1.65296	-1.9898
8.88	1.32039	-2.03962
8.89	1.0476	-2.08571
8.9	0.844569	-2.11809
8.91	0.71129	-2.12681
8.92	0.632818	-2.13179
8.93	0.604169	-2.12432
8.94	0.614134	-2.10688
8.95	0.645274	-2.07325
8.96	0.692607	-2.04087
8.97	0.748658	-2.01346
8.98	0.803465	-1.98855
8.99	0.849552	-1.97734
9	0.879446	-1.97734
9.01	0.888165	-1.99976
9.02	0.857025	-2.04834
9.03	0.788517	-2.09692
9.04	0.68015	-2.15671
9.05	0.525697	-2.22646
9.06	0.345085	-2.29497
9.07	0.154509	-2.36846
9.08	-0.0398039	-2.44444
9.09	-0.205468	-2.52914
9.1	-0.338747	-2.62256
9.11	-0.414728	-2.72719
9.12	-0.447114	-2.83182
9.13	-0.430921	-2.94517
9.14	-0.379852	-3.07097
9.15	-0.298888	-3.19429
9.16	-0.196749	-3.31511
9.17	-0.0672072	-3.40604
9.18	0.0648259	-3.4733
9.19	0.206824	-3.52188
9.2	0.341348	-3.52686
9.21	0.442242	-3.51067
9.22	0.475873	-3.48078
9.23	0.422312	-3.43967
9.24	0.271595	-3.39857
9.25	0.0237213	-3.37615
9.26	-0.311344	-3.36618
9.27	-0.696233	-3.39109
9.28	-1.08984	-3.42597
9.29	-1.45356	-3.48078
9.3	-1.74752	-3.54804
9.31	-1.95429	-3.63398
9.32	-2.04895	-3.71246
9.33	-2.03276	-3.79591
9.34	-1.90322	-3.86317
9.35	-1.67652	-3.92296
9.36	-1.37259	-3.98649
9.37	-1.03379	-4.0251
9.38	-0.696233	-4.05126
9.39	-0.384834	-4.06122
9.4	-0.118277	-4.05001
9.41	0.0648262	-4.03257
9.42	0.183158	-3.98275
9.43	0.227999	-3.91175
9.44	0.211806	-3.81459
9.45	0.13707	-3.71246
9.46	0.0174933	-3.59039
9.47	-0.154399	-3.46707
9.48	-0.352449	-3.33878
9.49	-0.562955	-3.21048
9.5	-0.77346	-3.08841
9.51	-0.97151	-2.95762
9.52	-1.13468	-2.81687
9.53	-1.25052	-2.69107
9.54	-1.30782	-2.56028
9.55	-1.28789	-2.42576
9.56	-1.20942	-2.30867
9.57	-1.0886	-2.19283
9.58	-0.927914	-2.07699
9.59	-0.765987	-1.9462
9.6	-0.619006	-1.81417
9.61	-0.504412	-1.66968
9.62	-0.429676	-1.52893
9.63	-0.38608	-1.38942
9.64	-0.381097	-1.27732
9.65	-0.38608	-1.20009
9.66	-0.387325	-1.15898
9.67	-0.391062	-1.16023
9.68	-0.387325	-1.21628
9.69	-0.384834	-1.296
9.7	-0.391062	-1.39814
9.71	-0.398536	-1.51149
9.72	-0.387325	-1.60989
9.73	-0.353694	-1.68338
9.74	-0.273976	-1.73071
9.75	-0.159381	-1.73943
9.76	-0.00866408	-1.71078
9.77	0.153263	-1.63356
9.78	0.30398	-1.52145
9.79	0.437259	-1.37821
9.8	0.543135	-1.20632
9.81	0.620362	-1.02321
9.82	0.66894	-0.851322
9.83	0.690115	-0.696868
9.84	0.66894	-0.571063
9.85	0.590467	-0.478889
9.86	0.444733	-0.4191
9.87	0.237964	-0.392943
9.88	-0.00617294	-0.401662
9.89	-0.267748	-0.446503
9.9	-0.513131	-0.521239
9.91	-0.694988	-0.608431
9.92	-0.810828	-0.728008
9.93	-0.853179	-0.83762
9.94	-0.838231	-0.943496
9.95	-0.770969	-1.01574
9.96	-0.666339	-1.05934
9.97	-0.506903	-1.05685
9.98	-0.335011	-1.02072
9.99	-0.164364	-0.947233
10	0.00503726	-0.832638
10.01	0.158246	-0.680675
10.02	0.291524	-0.507537
10.03	0.403628	-0.304505
10.04	0.518223	-0.106456
10.05	0.634063	0.0853662
10.06	0.767342	0.258504
10.07	0.921796	0.415449
10.08	1.08871	0.552465
10.09	1.26309	0.665814
10.1	1.44121	0.77169
10.11	1.60936	0.870092
10.12	1.76382	0.982195
10.13	1.89087	1.108
10.14	1.98803	1.26619
10.15	2.03162	1.46673
10.16	2.01543	1.70464
10.17	1.91952	1.96248
10.18	1.76008	2.25395
10.19	1.53214	2.54542
10.2	1.27555	2.82443
10.21	1.00899	3.07978
10.22	0.75364	3.2853
10.23	0.519468	3.43851
10.24	0.266612	3.5419
10.25	5.47132e-05	3.59919
10.26	-0.295151	3.62286
10.27	-0.60655	3.6266
10.28	-0.924177	3.61414
10.29	-1.24679	3.59795
10.3	-1.55569	3.57553
10.31	-1.82723	3.55186
10.32	-2.05518	3.53193
10.33	-2.2196	3.50204
10.34	-2.30928	3.45346
10.35	-2.32921	3.38744
10.36	-2.28935	3.30772
10.37	-2.20839	3.20683
10.38	-2.11995	3.10469
10.39	-2.04771	3.01625
10.4	-1.99913	2.9465
10.41	-2.00037	2.90166
10.42	-2.05767	2.88796
10.43	-2.15483	2.88796
10.44	-2.26319	2.90041
10.45	-2.3753	2.90664
10.46	-2.46498	2.9029
10.47	-2.54096	2.87799
10.48	-2.57459	2.83689
10.49	-2.56463	2.77336
10.5	-2.52228	2.67371
10.51	-2.4438	2.53919
10.52	-2.33045	2.36854
10.53	-2.21088	2.16302
10.54	-2.10749	1.95002
10.55	-2.03151	1.74076
10.56	-1.99414	1.5477
10.57	-1.98667	1.37082
10.58	-2.00785	1.22384
10.59	-2.03774	1.11298
10.6	-2.07013	1.01832
10.61	-2.0913	0.953547
10.62	-2.08258	0.88753
10.63	-2.0502	0.826496
10.64	-1.98169	0.766707
10.65	-1.88329	0.698199
10.66	-1.74876	0.614745
10.67	-1.58185	0.521325
10.68	-1.37633	0.422923
10.69	-1.13593	0.328258
10.7	-0.874354	0.247294
10.71	-0.607796	0.178786
10.72	-0.337502	0.138927
10.73	-0.0659618	0.121489
10.74	0.227999	0.131453
10.75	0.559327	0.16633
10.76	0.933006	0.216154
10.77	1.36149	0.269715
10.78	1.81115	0.324521
10.79	2.28074	0.373099
10.8	2.72044	0.404239
10.81	3.10034	0.42666
10.82	3.38808	0.430396
10.83	3.57616	0.434133
10.84	3.6484	0.450326
10.85	3.63969	0.476483
10.86	3.59111	0.527553
10.87	3.53256	0.602289
10.88	3.48648	0.694463
10.89	3.47153	0.795356
10.9	3.47153	0.88753
10.91	3.4815	0.96974
10.92	3.49022	1.03825
10.93	3.50392	1.08433
10.94	3.50765	1.09928
10.95	3.51388	1.08807
10.96	3.52634	1.04448
10.97	3.54128	0.963512
10.98	3.55623	0.853899
10.99	3.56246	0.725603
11	3.55748	0.59357
11.01	3.5363	0.459045
11.02	3.48648	0.341959
11.03	3.42046	0.242311
11.04	3.35818	0.175049
11.05	3.30213	0.127717
11.06	3.27473	0.114015
11.07	3.25853	0.131453
11.08	3.26352	0.17754
11.09	3.26974	0.253522
11.1	3.26974	0.358152
11.11	3.24982	0.481466
11.12	3.20373	0.634674
11.13	3.13024	0.792865
11.14	3.01191	0.958529
11.15	2.8587	1.13665
11.16	2.6457	1.30854
11.17	2.39409	1.47919
11.18	2.08643	1.62492
11.19	1.75136	1.75197
11.2	1.41505	1.85038
11.21	1.09992	1.91639
11.22	0.83585	1.93383
11.23	0.642782	1.89771
11.24	0.518223	1.81052
11.25	0.453452	1.66478
11.26	0.427294	1.4767
11.27	0.414838	1.26121
11.28	0.407365	1.02205
11.29	0.396154	0.786637
11.3	0.388681	0.564921
11.31	0.374979	0.36438
11.32	0.361278	0.204944
11.33	0.331384	0.0891034
11.34	0.285296	0.0118761
11.35	0.227999	-0.0304741
11.36	0.140807	-0.0504036
11.37	0.0411596	-0.04293
11.38	-0.0609792	-0.0117902
11.39	-0.166855	0.043016
11.4	-0.265257	0.116506
11.41	-0.348712	0.191242
11.42	-0.396045	0.265978
11.43	-0.420957	0.336977
11.44	-0.430921	0.414204
11.45	-0.42843	0.491431
11.46	-0.433412	0.572394
11.47	-0.454588	0.655849
11.48	-0.484482	0.743041
11.49	-0.526832	0.812794
11.5	-0.580393	0.873829
11.51	-0.630217	0.931126
11.52	-0.652637	0.985932
11.53	-0.631462	1.03576
11.54	-0.572919	1.08932
11.55	-0.485727	1.14911
11.56	-0.391062	1.22509
11.57	-0.296397	1.30107
11.58	-0.221661	1.37331
11.59	-0.164364	1.43186
11.6	-0.117031	1.4767
11.61	-0.0734352	1.49414
11.62	-0.0385585	1.48666
11.63	-0.0111554	1.46798
11.64	0.0150022	1.42812
11.65	0.0361772	1.37082
11.66	0.0623347	1.31726
11.67	0.0810187	1.25996
11.68	0.104685	1.2201
11.69	0.12586	1.17775
11.7	0.140807	1.13665
11.71	0.150772	1.10302
11.72	0.139562	1.08558
11.73	0.107176	1.08683
11.74	0.0635805	1.09554
11.75	5.52661e-05	1.12544
11.76	-0.0672072	1.15907
11.77	-0.122013	1.18274
11.78	-0.160627	1.18647
11.79	-0.18803	1.14911
11.8	-0.201732	1.07188
11.81	-0.183048	0.936109
11.82	-0.14568	0.754251
11.83	-0.0784175	0.53129
11.84	0.0212303	0.292135
11.85	0.127106	0.0517354
11.86	0.249174	-0.176209
11.87	0.363769	-0.390451
11.88	0.468399	-0.593483
11.89	0.551854	-0.771604
11.9	0.597941	-0.927303
11.91	0.614134	-1.05186
11.92	0.602923	-1.15276
11.93	0.566801	-1.24119
11.94	0.545626	-1.32839
11.95	0.534415	-1.39814
11.96	0.535661	-1.45544
11.97	0.569292	-1.49779
11.98	0.609151	-1.51772
11.99	0.658975	-1.49405
12	0.727483	-1.43426
12.01	0.789763	-1.34084
12.02	0.844569	-1.225
12.03	0.860762	-1.08674
12.04	0.828376	-0.96218
12.05	0.746167	-0.860041
12.06	0.624099	-0.789042
12.07	0.483346	-0.74171
12.08	0.332629	-0.719289
12.09	0.196859	-0.719289
12.1	0.0785276	-0.729254
12.11	-0.0148921	-0.745446
12.12	-0.0759263	-0.751674
12.13	-0.110803	-0.761639
12.14	-0.118277	-0.749183
12.15	-0.119522	-0.736726
12.16	-0.11454	-0.704341
12.17	-0.102084	-0.648289
12.18	-0.0833997	-0.589746
12.19	-0.0497687	-0.510028
12.2	-0.00990968	-0.406644
12.21	0.0374228	-0.29454
12.22	0.0797732	-0.162507
12.23	0.112159	-0.0304735
12.24	0.137071	0.0978228
12.25	0.152018	0.218645
12.26	0.163228	0.33075
12.27	0.163228	0.445344
12.28	0.150772	0.563675
12.29	0.134579	0.699445
12.3	0.119632	0.863863
12.31	0.100948	1.07686
12.32	0.10344	1.321
12.33	0.124615	1.59627
12.34	0.174438	1.87529
12.35	0.251665	2.15181
12.36	0.337611	2.41214
12.37	0.414838	2.66126
12.38	0.462171	2.86554
12.39	0.489574	3.02497
12.4	0.503276	3.12711
12.41	0.500784	3.16572
12.42	0.464662	3.1458
12.43	0.392418	3.0748
12.44	0.260385	2.96518
12.45	0.0635805	2.80201
12.46	-0.180556	2.60894
12.47	-0.47078	2.39096
12.48	-0.765987	2.14932
12.49	-1.04002	1.88276
12.5	-1.28789	1.59254
12.51	-1.49715	1.28238
12.52	-1.66531	0.956037
12.53	-1.78488	0.623463
12.54	-1.84966	0.295872
12.55	-1.84841	-0.0205097
12.56	-1.78239	-0.339382
12.57	-1.65659	-0.642062
12.58	-1.47224	-0.932285
12.59	-1.25675	-1.21504
12.6	-1.02009	-1.48159
12.61	-0.794635	-1.72822
12.62	-0.602814	-1.9736
12.63	-0.453342	-2.20404
12.64	-0.358677	-2.42576
12.65	-0.283941	-2.62505
12.66	-0.239099	-2.81189
12.67	-0.206714	-2.98254
12.68	-0.190521	-3.11332
12.69	-0.197995	-3.20176
12.7	-0.237854	-3.25532
12.71	-0.317572	-3.25159
12.72	-0.433412	-3.2055
12.73	-0.594094	-3.11457
12.74	-0.803354	-2.97008
12.75	-1.03628	-2.79819
12.76	-1.2991	-2.61509
12.77	-1.58434	-2.44568
12.78	-1.86958	-2.28874
12.79	-2.13739	-2.15172
12.8	-2.38402	-2.05457
12.81	-2.59577	-1.99353
12.82	-2.77015	-1.9736
12.83	-2.90966	-2.00474
12.84	-3.02301	-2.07076
12.85	-3.10522	-2.16542
12.86	-3.15006	-2.28127
12.87	-3.14632	-2.4133
12.88	-3.08778	-2.52789
12.89	-2.96695	-2.63128
12.9	-2.79506	-2.68608
12.91	-2.58207	-2.68982
12.92	-2.33668	-2.6263
12.93	-2.05144	-2.50049
12.94	-1.75624	-2.30618
12.95	-1.4411	-2.04709
12.96	-1.13717	-1.75313
12.97	-0.845704	-1.42803
12.98	-0.59534	-1.09048
12.99	-0.388571	-0.744201
13	-0.216679	-0.410381
13.01	-0.0672074	-0.0952452
13.02	0.0735448	0.193733
13.03	0.213052	0.454063
13.04	0.347576	0.688235
13.05	0.468399	0.892513
13.06	0.554345	1.08309
13.07	0.591713	1.24502
13.08	0.574275	1.38951
13.09	0.509504	1.51531
13.1	0.404874	1.62617
13.11	0.296507	1.70962
13.12	0.206824	1.77439
13.13	0.158246	1.81799
13.14	0.166965	1.83169
13.15	0.213052	1.83792
13.16	0.321418	1.82422
13.17	0.47089	1.78934
13.18	0.66894	1.72706
13.19	0.891902	1.6324
13.2	1.15099	1.51656
13.21	1.43498	1.35961
13.22	1.73268	1.17402
13.23	2.03785	0.968494
13.24	2.32558	0.72934
13.25	2.5884	0.48022
13.26	2.80514	0.236084
13.27	2.97205	0.0243323
13.28	3.07294	-0.151297
13.29	3.08913	-0.285821
13.3	3.03059	-0.361803
13.31	2.89731	-0.400416
13.32	2.69926	-0.380487
13.33	2.45637	-0.311979
13.34	2.18981	-0.199875
13.35	1.91952	-0.0541404
13.36	1.65421	0.110278
13.37	1.38889	0.277188
13.38	1.13355	0.417941
13.39	0.885674	0.537518
13.4	0.657729	0.597306
13.41	0.460925	0.608517
13.42	0.311454	0.552465
13.43	0.184403	0.434133
13.44	0.104685	0.25975
13.45	0.0511242	0.0392793
13.46	0.0249667	-0.207349
13.47	0.0137564	-0.467678
13.48	0.00877394	-0.725517
13.49	-0.00866444	-0.970899
13.5	-0.0485235	-1.17019
13.51	-0.123259	-1.32465
13.52	-0.249065	-1.42554
13.53	-0.414729	-1.47661
13.54	-0.614024	-1.48533
13.55	-0.84695	-1.45045
13.56	-1.08486	-1.39565
13.57	-1.30533	-1.31967
13.58	-1.48968	-1.2524
13.59	-1.63168	-1.1814
13.6	-1.72634	-1.12286
13.61	-1.80357	-1.07055
13.62	-1.8945	-1.01823
13.63	-2.01906	-0.957198
13.64	-2.20963	-0.886199
13.65	-2.45875	-0.832638
13.66	-2.7714	-0.790288
13.67	-3.11892	-0.76413
13.68	-3.50256	-0.765376
13.69	-3.87749	-0.789042
13.7	-4.24245	-0.841357
13.71	-4.60118	-0.894918
13.72	-4.92877	-0.939759
13.73	-5.22522	-0.96218
13.74	-5.47309	-0.954706
13.75	-5.6973	-0.917338
13.76	-5.86795	-0.852567
13.77	-5.98379	-0.77534
13.78	-6.03237	-0.698114
13.79	-5.99375	-0.632097
13.8	-5.88414	-0.578536
13.81	-5.70104	-0.513765
13.82	-5.46687	-0.452731
13.83	-5.20405	-0.384223
13.84	-4.9487	-0.31447
13.85	-4.73446	-0.242225
13.86	-4.58374	-0.171226
13.87	-4.48285	-0.110192
13.88	-4.41932	-0.0230005
13.89	-4.40188	0.0616999
13.9	-4.40811	0.162593
13.91	-4.43925	0.277188
13.92	-4.4953	0.409221
13.93	-4.56505	0.551219
13.94	-4.6647	0.704428
13.95	-4.78054	0.860127
13.96	-4.90759	1.01084
13.97	-5.03963	1.1516
13.98	-5.17166	1.26993
13.99	-5.29248	1.35587
14	-5.40832	1.40943
14.01	-5.49053	1.4194
14.02	-5.55281	1.38701
14.03	-5.59143	1.31352
14.04	-5.60637	1.19893
14.05	-5.58146	1.05444
14.06	-5.51171	0.895004
14.07	-5.41829	0.715638
14.08	-5.31117	0.544991
14.09	-5.19782	0.370608
14.1	-5.08945	0.203698
14.11	-4.97361	0.0604544
14.12	-4.8341	-0.0653508
14.13	-4.66844	-0.16749
14.14	-4.44299	-0.239734
14.15	-4.1702	-0.274611
14.16	-3.86254	-0.265892
14.17	-3.52872	-0.204858
14.18	-3.17497	-0.0815438
14.19	-2.8399	0.0866117
14.2	-2.52228	0.297117
14.21	-2.23828	0.520079
14.22	-2.00286	0.738059
14.23	-1.81852	0.9386
14.24	-1.70267	1.11672
14.25	-1.64413	1.27366
14.26	-1.65161	1.41068
14.27	-1.73257	1.51531
14.28	-1.87706	1.59378
14.29	-2.07885	1.66603
14.3	-2.33046	1.71336
14.31	-2.6157	1.72332
14.32	-2.91713	1.69592
14.33	-3.22106	1.61745
14.34	-3.48761	1.50908
14.35	-3.69314	1.37829
14.36	-3.82268	1.23879
14.37	-3.88247	1.11547
14.38	-3.88371	1.00088
14.39	-3.83887	0.91867
14.4	-3.77036	0.85639
14.41	-3.6894	0.81404
14.42	-3.60096	0.786637
14.43	-3.50381	0.7829
14.44	-3.38423	0.779163
14.45	-3.24846	0.781654
14.46	-3.10397	0.789128
14.47	-2.95574	0.797847
14.48	-2.80378	0.816531
14.49	-2.66054	0.838952
14.5	-2.52726	0.855145
14.51	-2.4301	0.881302
14.52	-2.35288	0.911196
14.53	-2.29931	0.947319
14.54	-2.27689	1.00337
14.55	-2.27191	1.06814
14.56	-2.28437	1.14911
14.57	-2.30056	1.25
14.58	-2.31302	1.35712
14.59	-2.30554	1.48168
14.6	-2.27939	1.60998
14.61	-2.22582	1.73578
14.62	-2.14237	1.85162
14.63	-2.02528	1.95127
14.64	-1.88329	2.02227
14.65	-1.71264	2.0696
14.66	-1.53203	2.0833
14.67	-1.35515	2.06213
14.68	-1.19323	2.00358
14.69	-1.03628	1.91764
14.7	-0.890546	1.81052
14.71	-0.733601	1.68097
14.72	-0.565446	1.54147
14.73	-0.383589	1.38577
14.74	-0.163118	1.21886
14.75	0.0660715	1.04074
14.76	0.297752	0.858881
14.77	0.525696	0.695708
14.78	0.737448	0.544991
14.79	0.904357	0.400502
14.8	1.05632	0.269715
14.81	1.18586	0.153874
14.82	1.29174	0.055472
14.83	1.37893	-0.0055622
14.84	1.43747	-0.055386
14.85	1.46363	-0.100227
14.86	1.45989	-0.138841
14.87	1.43	-0.172472
14.88	1.37021	-0.213577
14.89	1.29547	-0.263401
14.9	1.19458	-0.304505
14.91	1.08123	-0.340628
14.92	0.961654	-0.368031
14.93	0.840832	-0.384223
14.94	0.727483	-0.389206
14.95	0.620361	-0.394188
14.96	0.541889	-0.396679
14.97	0.495802	-0.397925
14.98	0.478363	-0.426574
14.99	0.494556	-0.473906
15	0.531924	-0.538677
15.01	0.60666	-0.632097
15.02	0.693851	-0.746692
15.03	0.800972	-0.872497
15.04	0.921796	-1.02072
15.05	1.02892	-1.1814
15.06	1.10116	-1.35579
15.07	1.14476	-1.53391
15.08	1.14725	-1.71452
15.09	1.09867	-1.89762
15.1	1.03888	-2.08073
15.11	0.960409	-2.26258
15.12	0.876954	-2.44319
15.13	0.789763	-2.61135
15.14	0.702571	-2.76705
15.15	0.610397	-2.90905
15.16	0.535661	-3.03112
15.17	0.455943	-3.13076
15.18	0.37747	-3.2192
15.19	0.27284	-3.29767
15.2	0.135825	-3.3749
15.21	-0.0447867	-3.44341
15.22	-0.27024	-3.52313
15.23	-0.530569	-3.59911
15.24	-0.822038	-3.69502
15.25	-1.09607	-3.79217
15.26	-1.33149	-3.90179
15.27	-1.50836	-4.02386
15.28	-1.61673	-4.13596
15.29	-1.64662	-4.2381
15.3	-1.6242	-4.32404
15.31	-1.5532	-4.38881
15.32	-1.45231	-4.44113
15.33	-1.32028	-4.48597
15.34	-1.16209	-4.51337
15.35	-0.98272	-4.52209
15.36	-0.787162	-4.50216
15.37	-0.571674	-4.46853
15.38	-0.344975	-4.40625
15.39	-0.113294	-4.32155
15.4	0.117141	-4.22938
15.41	0.32391	-4.13098
15.42	0.515732	-4.03631
15.43	0.667695	-3.95784
15.44	0.769833	-3.88933
15.45	0.827131	-3.83328
15.46	0.82464	-3.79093
15.47	0.782289	-3.76353
15.48	0.71129	-3.72616
15.49	0.631572	-3.67633
15.5	0.568047	-3.61156
15.51	0.515732	-3.51814
15.52	0.503276	-3.39109
15.53	0.510749	-3.2466
15.54	0.546872	-3.07471
15.55	0.601678	-2.87791
15.56	0.678905	-2.67114
15.57	0.759869	-2.47807
15.58	0.84706	-2.28874
15.59	0.928024	-2.12432
15.6	0.976602	-1.99229
15.61	0.995286	-1.89513
15.62	0.962901	-1.82289
15.63	0.889411	-1.78054
15.64	0.783535	-1.76559
15.65	0.651502	-1.77182
15.66	0.492066	-1.79548
15.67	0.336366	-1.82787
15.68	0.174438	-1.86524
15.69	0.0424053	-1.89389
15.7	-0.0684527	-1.91132
15.71	-0.148171	-1.91755
15.72	-0.200486	-1.89513
15.73	-0.226643	-1.8615
15.74	-0.236608	-1.79548
15.75	-0.215433	-1.72199
15.76	-0.173083	-1.63854
15.77	-0.0896279	-1.5364
15.78	0.0287037	-1.43052
15.79	0.189385	-1.33212
15.8	0.396155	-1.23621
15.81	0.634063	-1.1677
15.82	0.89813	-1.11165
15.83	1.17341	-1.07428
15.84	1.44744	-1.06307
15.85	1.70652	-1.08425
15.86	1.95066	-1.15898
15.87	2.15369	-1.2823
15.88	2.32558	-1.45294
15.89	2.46384	-1.65971
15.9	2.58218	-1.88143
15.91	2.67684	-2.1156
15.92	2.72666	-2.32486
15.93	2.74286	-2.51046
15.94	2.72417	-2.67986
15.95	2.66065	-2.82933
15.96	2.56474	-2.97008
15.97	2.4327	-3.10211
15.98	2.29444	-3.23788
15.99	2.14248	-3.38486
16	1.99301	-3.55177
16.01	1.85101	-3.73488
16.02	1.7115	-3.94538
16.03	1.59068	-4.16087
16.04	1.48231	-4.40127
16.05	1.4026	-4.6479
16.06	1.3453	-4.88082
16.07	1.30918	-5.07763
16.08	1.28925	-5.23333
16.09	1.29298	-5.32675
16.1	1.31416	-5.33671
16.11	1.35402	-5.27568
16.12	1.43249	-5.14489
16.13	1.53961	-4.95805
16.14	1.67164	-4.72139
16.15	1.83855	-4.45608
16.16	2.02788	-4.16959
16.17	2.23465	-3.88809
16.18	2.4489	-3.61654
16.19	2.65193	-3.36867
16.2	2.84998	-3.14696
16.21	3.04678	-2.92524
16.22	3.25355	-2.72096
16.23	3.47029	-2.51046
16.24	3.70944	-2.29123
16.25	3.94984	-2.06329
16.26	4.20519	-1.81915
16.27	4.45306	-1.58996
16.28	4.69595	-1.38195
16.29	4.9102	-1.20009
16.3	5.08333	-1.05186
16.31	5.20042	-0.918585
16.32	5.26893	-0.802744
16.33	5.27515	-0.681921
16.34	5.22658	-0.551134
16.35	5.12195	-0.391698
16.36	4.9787	-0.208595
16.37	4.81428	-0.00556285
16.38	4.64115	0.201206
16.39	4.47299	0.402993
16.4	4.31978	0.578622
16.41	4.20892	0.713147
16.42	4.15412	0.786637
16.43	4.16159	0.789128
16.44	4.23259	0.741795
16.45	4.37334	0.660832
16.46	4.58011	0.568657
16.47	4.83172	0.485203
16.48	5.0933	0.432887
16.49	5.34864	0.422923
16.5	5.56289	0.465273
16.51	5.7298	0.548728
16.52	5.84315	0.675779
16.53	5.90169	0.817777
16.54	5.92286	0.975968
16.55	5.90916	1.11797
16.56	5.88799	1.22882
16.57	5.86806	1.3073
16.58	5.87179	1.3347
16.59	5.89795	1.321
16.6	5.9403	1.24626
16.61	6.00632	1.13167
16.62	6.08105	0.969739
16.63	6.167	0.756743
16.64	6.24921	0.527553
16.65	6.29654	0.27096
16.66	6.31274	-0.0130357
16.67	6.28284	-0.316961
16.68	6.22305	-0.633343
16.69	6.14333	-0.960934
16.7	6.03621	-1.28728
16.71	5.93283	-1.63605
16.72	5.82073	-1.97236
16.73	5.70115	-2.3012
16.74	5.5604	-2.61882
16.75	5.38477	-2.91154
16.76	5.14437	-3.19304
16.77	4.83421	-3.44216
16.78	4.43064	-3.6589
16.79	3.96728	-3.83702
16.8	3.45908	-3.97652
16.81	2.93842	-4.08115
16.82	2.41527	-4.16461
16.83	1.91952	-4.24557
16.84	1.45865	-4.33027
16.85	1.05632	-4.43241
16.86	0.71129	-4.53704
16.87	0.442241	-4.62921
16.88	0.255402	-4.68527
16.89	0.159491	-4.72762
16.9	0.152018	-4.72388
16.91	0.220525	-4.67281
16.92	0.341348	-4.57441
16.93	0.51324	-4.41248
16.94	0.710045	-4.21319
16.95	0.913077	-3.98773
16.96	1.11113	-3.76975
16.97	1.31665	-3.56548
16.98	1.52591	-3.40728
16.99	1.74763	-3.29892
17	1.98304	-3.24909
17.01	2.23216	-3.24536
17.02	2.49125	-3.28522
17.03	2.73788	-3.34251
17.04	2.96333	-3.40728
17.05	3.15141	-3.46583
17.06	3.29216	-3.51191
17.07	3.37687	-3.54679
17.08	3.40427	-3.56298
17.09	3.36067	-3.56298
17.1	3.25604	-3.54555
17.11	3.07792	-3.50818
17.12	2.83379	-3.44092
17.13	2.53858	-3.34625
17.14	2.20351	-3.23415
17.15	1.84603	-3.08966
17.16	1.48107	-2.92275
17.17	1.13355	-2.72221
17.18	0.810938	-2.50423
17.19	0.518223	-2.27255
17.2	0.270349	-2.04087
17.21	0.0610889	-1.81168
17.22	-0.0971018	-1.60864
17.23	-0.205469	-1.44547
17.24	-0.26152	-1.33586
17.25	-0.268994	-1.28105
17.26	-0.221661	-1.27109
17.27	-0.131978	-1.30472
17.28	0.00379176	-1.37821
17.29	0.176929	-1.47412
17.3	0.372488	-1.5937
17.31	0.569292	-1.73071
17.32	0.758623	-1.87271
17.33	0.934252	-1.99852
17.34	1.0912	-2.11311
17.35	1.22323	-2.19781
17.36	1.3179	-2.26009
17.37	1.37893	-2.31365
17.38	1.38516	-2.37842
17.39	1.34281	-2.42949
17.4	1.24316	-2.49925
17.41	1.10614	-2.56775
17.42	0.941726	-2.65868
17.43	0.743676	-2.75958
17.44	0.531924	-2.85549
17.45	0.308962	-2.9514
17.46	0.0835099	-3.02364
17.47	-0.164364	-3.07222
17.48	-0.412237	-3.07596
17.49	-0.666339	-3.04108
17.5	-0.911721	-2.96883
17.51	-1.15959	-2.86794
17.52	-1.39875	-2.74338
17.53	-1.6379	-2.62879
17.54	-1.88453	-2.50921
17.55	-2.14112	-2.39212
17.56	-2.41516	-2.28002
17.57	-2.70912	-2.16044
17.58	-3.01802	-2.03339
17.59	-3.31821	-1.9051
17.6	-3.60595	-1.75936
17.61	-3.85631	-1.61238
17.62	-4.06059	-1.46665
17.63	-4.22874	-1.30721
17.64	-4.34334	-1.13905
17.65	-4.3969	-0.972145
17.66	-4.38943	-0.78406
17.67	-4.32465	-0.594729
17.68	-4.20259	-0.402908
17.69	-4.03941	-0.207349
17.7	-3.84385	-0.00929931
17.71	-3.65203	0.175049
17.72	-3.49509	0.345696
17.73	-3.38049	0.51136
17.74	-3.31697	0.674533
17.75	-3.29455	0.821513
17.76	-3.28832	0.957283
17.77	-3.28209	1.07935
17.78	-3.24223	1.19395
17.79	-3.18742	1.2911
17.8	-3.09525	1.37331
17.81	-2.95948	1.44431
17.82	-2.78385	1.49912
17.83	-2.58705	1.5315
17.84	-2.37903	1.55766
17.85	-2.19842	1.56513
17.86	-2.0502	1.56887
17.87	-1.95553	1.57012
17.88	-1.91443	1.57884
17.89	-1.92813	1.58631
17.9	-1.97795	1.58756
17.91	-2.06763	1.58382
17.92	-2.17849	1.58008
17.93	-2.28561	1.5888
17.94	-2.39024	1.59378
17.95	-2.46996	1.61994
17.96	-2.531	1.66852
17.97	-2.55466	1.7308
17.98	-2.5447	1.80803
17.99	-2.50733	1.89895
18	-2.4463	1.9986
18.01	-2.3616	2.09825
18.02	-2.26942	2.20039
18.03	-2.15856	2.30377
18.04	-2.02155	2.39844
18.05	-1.86585	2.47442
18.06	-1.68773	2.52424
18.07	-1.48843	2.5367
18.08	-1.28789	2.52051
18.09	-1.08237	2.46819
18.1	-0.884318	2.37975
18.11	-0.686269	2.26018
18.12	-0.491956	2.12192
18.13	-0.276467	1.96123
18.14	-0.0422953	1.77439
18.15	0.206824	1.58382
18.16	0.469645	1.38203
18.17	0.724992	1.17651
18.18	0.965392	0.988423
18.19	1.17714	0.801584
18.2	1.35277	0.619727
18.21	1.47484	0.471501
18.22	1.55954	0.348187
18.23	1.60563	0.24854
18.24	1.62431	0.182523
18.25	1.62431	0.158857
18.26	1.61559	0.17754
18.27	1.58819	0.234838
18.28	1.53463	0.320784
18.29	1.46612	0.432888
18.3	1.36149	0.567412
18.31	1.20828	0.708164
18.32	1.02393	0.847671
18.33	0.802219	0.970985
18.34	0.556836	1.06939
18.35	0.310208	1.13789
18.36	0.0722995	1.17526
18.37	-0.14568	1.18647
18.38	-0.322555	1.17277
18.39	-0.464552	1.15409
18.4	-0.582884	1.13914
18.41	-0.66883	1.12046
18.42	-0.733601	1.14163
18.43	-0.78218	1.17028
18.44	-0.817056	1.2226
18.45	-0.830758	1.27989
18.46	-0.81581	1.33968
18.47	-0.780934	1.39698
18.48	-0.743566	1.44307
18.49	-0.708689	1.47171
18.5	-0.698724	1.46922
18.51	-0.697479	1.45552
18.52	-0.724882	1.41566
18.53	-0.768478	1.36833
18.54	-0.814565	1.30854
18.55	-0.840722	1.24751
18.56	-0.839477	1.21014
18.57	-0.803354	1.19146
18.58	-0.726127	1.179
18.59	-0.619006	1.179
18.6	-0.475763	1.179
18.61	-0.322554	1.18025
18.62	-0.165609	1.16405
18.63	-0.0285937	1.13416
18.64	0.0660712	1.08683
18.65	0.107176	1.01956
18.66	0.0984568	0.931126
18.67	0.0399136	0.83397
18.68	-0.0647161	0.721866
18.69	-0.195504	0.627201
18.7	-0.335011	0.547483
18.71	-0.455834	0.491431
18.72	-0.555481	0.467764
18.73	-0.627726	0.482711
18.74	-0.66883	0.522571
18.75	-0.680041	0.579868
18.76	-0.694988	0.643393
18.77	-0.708689	0.708164
18.78	-0.74232	0.7829
18.79	-0.792144	0.861373
18.8	-0.855669	0.953547
18.81	-0.936633	1.0669
18.82	-1.04251	1.19768
18.83	-1.13717	1.35338
18.84	-1.2281	1.53773
18.85	-1.29412	1.74325
18.86	-1.31903	1.95999
18.87	-1.29786	2.17797
18.88	-1.22063	2.381
18.89	-1.09607	2.54417
18.9	-0.921686	2.66126
18.91	-0.72239	2.71606
18.92	-0.515622	2.6787
18.93	-0.321309	2.56535
18.94	-0.146925	2.37602
18.95	-0.0236114	2.13562
18.96	0.0336863	1.86159
18.97	0.00877418	1.58133
18.98	-0.0871367	1.32598
18.99	-0.23038	1.12046
19	-0.391062	1.00711
19.01	-0.562955	0.975968
19.02	-0.702461	1.05942
19.03	-0.808337	1.23879
19.04	-0.894283	1.51905
19.05	-0.970264	1.87902
19.06	-1.03379	2.28509
19.07	-1.09358	2.71233
19.08	-1.14838	3.15078
19.09	-1.19696	3.56307
19.1	-1.23059	3.94921
19.11	-1.2418	4.28801
19.12	-1.23807	4.57823
19.13	-1.22187	4.81365
19.14	-1.18949	5.00547
19.15	-1.14091	5.15494
19.16	-1.09358	5.26829
19.17	-1.03628	5.34801
19.18	-0.977738	5.40157
19.19	-0.916704	5.42648
19.2	-0.854424	5.42897
19.21	-0.795881	5.38911
19.22	-0.727373	5.30441
19.23	-0.653883	5.17861
19.24	-0.580393	5.01668
19.25	-0.496938	4.83358
19.26	-0.40601	4.62307
19.27	-0.31259	4.40883
19.28	-0.194258	4.19832
19.29	-0.0584881	4.00152
19.3	0.0872469	3.80347
19.31	0.270349	3.60417
19.32	0.485838	3.42107
19.33	0.712536	3.23548
19.34	0.950445	3.03743
19.35	1.19084	2.85059
19.36	1.39761	2.66001
19.37	1.57324	2.48065
19.38	1.68908	2.31872
19.39	1.75261	2.18793
19.4	1.76382	2.10821
19.41	1.72521	2.09327
19.42	1.66168	2.14309
19.43	1.57947	2.25644
19.44	1.501	2.43332
19.45	1.45242	2.64756
19.46	1.44121	2.8755
19.47	1.49103	3.09846
19.48	1.58445	3.28157
19.49	1.70278	3.40613
19.5	1.83482	3.44848
19.51	1.9519	3.39367
19.52	2.05903	3.22427
19.53	2.15494	2.97017
19.54	2.24213	2.62763
19.55	2.32434	2.22779
19.56	2.39534	1.7881
19.57	2.46509	1.34591
19.58	2.52239	0.911197
19.59	2.55104	0.525062
19.6	2.5199	0.185014
19.61	2.41153	-0.0865258
19.62	2.21472	-0.302014
19.63	1.93197	-0.46145
19.64	1.57573	-0.583519
19.65	1.16967	-0.668219
19.66	0.754886	-0.72178
19.67	0.356295	-0.741709
19.68	0.00628289	-0.725517
19.69	-0.290169	-0.67943
19.7	-0.513131	-0.612167
19.71	-0.666339	-0.518748
19.72	-0.752285	-0.396679
19.73	-0.787162	-0.260909
19.74	-0.770969	-0.107701
19.75	-0.739829	0.0479985
19.76	-0.690005	0.229855
19.77	-0.645164	0.407976
19.78	-0.610287	0.568658
19.79	-0.607796	0.708164
19.8	-0.696233	0.827742
19.81	-1.32028	0.904969
19.82	-3.42783	0.914933
19.83	-8.10753	0.853899
19.84	-16.1254	0.741795
19.85	-27.5712	0.538763
19.86	-41.7436	0.138927
19.87	-57.4593	-0.657009
19.88	-73.4291	-2.08446
19.89	-88.5419	-4.3502
19.9	-101.974	-7.58875
19.91	-113.253	-11.8151
19.92	-122.205	-17.7416
19.93	-128.889	-27.5258
19.94	-133.553	-40.2396
19.95	-136.538	-54.9089
[truncated: 22,004 more rows]

## Sheet: Fig.S2f
Supplementary Figure S2				Supplementary Figure S2				Supplementary Figure S2
Supplementary Figure S2 f (left)				Supplementary Figure S2 f (left)				Supplementary Figure S2 f (right)
CaV3.2				CaV3.2				CaV3.2
ICa (pA)				ICa Boltzmman fit				ICa norm Boltzmann fit
Vm (mV)	Vehicle	1 μM ML218		Vm (mV)	Vehicle	1 μM ML218		Vm (mV)	Vehicle	1 μM ML218
-90	1.33972	-1.16376		-90	-1.13689	-0.00509741		-90	-0.00112265	-6.71159e-05
-85	0.620484	-0.642237		-89.5703	-1.22468	-0.00568924		-89.5703	-0.00120935	-7.49083e-05
-80	-0.357865	-0.718942		-89.1406	-1.31924	-0.00634971		-89.1406	-0.00130272	-8.36045e-05
-75	-1.96531	-0.0959691		-88.7109	-1.42107	-0.00708678		-88.7109	-0.00140327	-9.33092e-05
-70	-7.31938	-0.88107		-88.2812	-1.53073	-0.0079093		-88.2812	-0.00151157	-0.000104139
-65	-39.992	-6.18838		-87.8516	-1.64883	-0.00882719		-87.8516	-0.00162819	-0.000116225
-60	-123.366	-15.8174		-87.4219	-1.77601	-0.00985148		-87.4219	-0.00175377	-0.000129711
-55	-374.591	-20.6297		-86.9922	-1.91297	-0.0109945		-86.9922	-0.00188901	-0.000144761
-50	-661.158	-54.1278		-86.5625	-2.06045	-0.01227		-86.5625	-0.00203465	-0.000161554
-45	-862.389	-69.6939		-86.1328	-2.21925	-0.0136932		-86.1328	-0.00219146	-0.000180294
-40	-957.457	-75.9492		-85.7031	-2.39025	-0.0152814		-85.7031	-0.00236032	-0.000201205
-35	-1012.68	-72.3689		-85.2734	-2.57437	-0.0170535		-85.2734	-0.00254213	-0.000224538
-30	-1001.51	-68.8092		-84.8438	-2.77262	-0.0190308		-84.8438	-0.0027379	-0.000250573
-25	-981.519	-63.225		-84.4141	-2.98606	-0.0212372		-84.4141	-0.00294867	-0.000279623
-20	-912.772	-59.2656		-83.9844	-3.21587	-0.023699		-83.9844	-0.0031756	-0.000312037
-15	-840.945	-49.3844		-83.5547	-3.46328	-0.0264458		-83.5547	-0.00341991	-0.000348203
-10	-729.711	-45.0977		-83.125	-3.72963	-0.0295105		-83.125	-0.00368293	-0.000388555
-5	-635.599	-37.214		-82.6953	-4.01637	-0.0329298		-82.6953	-0.00396608	-0.000433576
0	-551.302	-34.3875		-82.2656	-4.32504	-0.0367448		-82.2656	-0.00427088	-0.000483807
5	-473.461	-32.4426		-81.8359	-4.6573	-0.0410011		-81.8359	-0.00459899	-0.000539848
10	-368.482	-28.9236		-81.4062	-5.01495	-0.0457496		-81.4062	-0.00495215	-0.00060237
15	-290.416	-27.6189		-80.9766	-5.39989	-0.0510472		-80.9766	-0.00533228	-0.000672121
20	-217.238	-24.011		-80.5469	-5.81421	-0.0569571		-80.5469	-0.0057414	-0.000749935
				-80.1172	-6.2601	-0.06355		-80.1172	-0.00618172	-0.000836742
				-79.6875	-6.73996	-0.0709047		-79.6875	-0.00665557	-0.000933579
				-79.2578	-7.25634	-0.079109		-79.2578	-0.00716548	-0.0010416
				-78.8281	-7.81199	-0.0882605		-78.8281	-0.00771417	-0.0011621
				-78.3984	-8.40984	-0.0984685		-78.3984	-0.00830454	-0.0012965
				-77.9688	-9.05307	-0.109854		-77.9688	-0.00893971	-0.00144642
				-77.5391	-9.74506	-0.122554		-77.5391	-0.00962304	-0.00161363
				-77.1094	-10.4895	-0.136718		-77.1094	-0.0103581	-0.00180011
				-76.6797	-11.2902	-0.152514		-76.6797	-0.0111488	-0.0020081
				-76.25	-12.1513	-0.17013		-76.25	-0.0119992	-0.00224004
				-75.8203	-13.0775	-0.189774		-75.8203	-0.0129137	-0.00249869
				-75.3906	-14.0734	-0.211679		-75.3906	-0.0138971	-0.00278711
				-74.9609	-15.1441	-0.236104		-74.9609	-0.0149545	-0.0031087
				-74.5312	-16.2953	-0.263336		-74.5312	-0.0160913	-0.00346725
				-74.1016	-17.5328	-0.293695		-74.1016	-0.0173132	-0.00386699
				-73.6719	-18.8628	-0.327539		-73.6719	-0.0186266	-0.0043126
				-73.2422	-20.292	-0.365264		-73.2422	-0.020038	-0.00480931
				-72.8125	-21.8278	-0.40731		-72.8125	-0.0215544	-0.00536292
				-72.3828	-23.4776	-0.454168		-72.3828	-0.0231836	-0.00597988
				-71.9531	-25.2496	-0.506382		-71.9531	-0.0249335	-0.00666736
				-71.5234	-27.1527	-0.564556		-71.5234	-0.0268127	-0.00743333
				-71.0938	-29.1959	-0.629362		-71.0938	-0.0288303	-0.00828661
				-70.6641	-31.3892	-0.701544		-70.6641	-0.0309962	-0.009237
				-70.2344	-33.7431	-0.781927		-70.2344	-0.0333206	-0.0102954
				-69.8047	-36.2686	-0.871425		-69.8047	-0.0358145	-0.0114738
				-69.375	-38.9776	-0.971051		-69.375	-0.0384895	-0.0127855
				-68.9453	-41.8825	-1.08192		-68.9453	-0.041358	-0.0142453
				-68.5156	-44.9965	-1.20527		-68.5156	-0.0444331	-0.0158695
				-68.0859	-48.3336	-1.34247		-68.0859	-0.0477284	-0.0176759
				-67.6562	-51.9085	-1.49502		-67.6562	-0.0512585	-0.0196845
				-67.2266	-55.7366	-1.66458		-67.2266	-0.0550387	-0.0219169
				-66.7969	-59.8343	-1.85295		-66.7969	-0.0590851	-0.0243972
				-66.3672	-64.2185	-2.06214		-66.3672	-0.0634144	-0.0271515
				-65.9375	-68.9071	-2.29433		-65.9375	-0.0680442	-0.0302087
				-65.5078	-73.9186	-2.5519		-65.5078	-0.072993	-0.0336
				-65.0781	-79.2724	-2.83744		-65.0781	-0.0782799	-0.0373597
				-64.6484	-84.9886	-3.15378		-64.6484	-0.0839245	-0.0415248
				-64.2188	-91.0879	-3.50396		-64.2188	-0.0899474	-0.0461355
				-63.7891	-97.5916	-3.89127		-63.7891	-0.0963696	-0.0512351
				-63.3594	-104.522	-4.31925		-63.3594	-0.103213	-0.0568701
				-62.9297	-111.9	-4.79165		-62.9297	-0.110499	-0.0630902
				-62.5	-119.75	-5.3125		-62.5	-0.11825	-0.069948
				-62.0703	-128.093	-5.886		-62.0703	-0.12649	-0.0774991
				-61.6406	-136.954	-6.51659		-61.6406	-0.135239	-0.0858018
				-61.2109	-146.354	-7.20885		-61.2109	-0.144521	-0.0949166
				-60.7812	-156.316	-7.96749		-60.7812	-0.154358	-0.104905
				-60.3516	-166.861	-8.7973		-60.3516	-0.164772	-0.115831
				-59.9219	-178.01	-9.70303		-59.9219	-0.175781	-0.127757
				-59.4922	-189.784	-10.6894		-59.4922	-0.187407	-0.140744
				-59.0625	-202.199	-11.7608		-59.0625	-0.199667	-0.154851
				-58.6328	-215.272	-12.9214		-58.6328	-0.212576	-0.170132
				-58.2031	-229.017	-14.1749		-58.2031	-0.226149	-0.186636
				-57.7734	-243.445	-15.5243		-57.7734	-0.240397	-0.204403
				-57.3438	-258.565	-16.9718		-57.3438	-0.255327	-0.223462
				-56.9141	-274.381	-18.5186		-56.9141	-0.270945	-0.243829
				-56.4844	-290.893	-20.1648		-56.4844	-0.287251	-0.265504
				-56.0547	-308.099	-21.9092		-56.0547	-0.304241	-0.288471
				-55.625	-325.989	-23.7488		-55.625	-0.321907	-0.312693
				-55.1953	-344.551	-25.6793		-55.1953	-0.340237	-0.338111
				-54.7656	-363.765	-27.6944		-54.7656	-0.35921	-0.364644
				-54.3359	-383.606	-29.7863		-54.3359	-0.378802	-0.392187
				-53.9062	-404.043	-31.9451		-53.9062	-0.398984	-0.420611
				-53.4766	-425.04	-34.1595		-53.4766	-0.419718	-0.449768
				-53.0469	-446.554	-36.4166		-53.0469	-0.440963	-0.479486
				-52.6172	-468.535	-38.7022		-52.6172	-0.462669	-0.50958
				-52.1875	-490.929	-41.0013		-52.1875	-0.484782	-0.539851
				-51.7578	-513.675	-43.2979		-51.7578	-0.507243	-0.57009
				-51.3281	-536.707	-45.5761		-51.3281	-0.529987	-0.600087
				-50.8984	-559.954	-47.8202		-50.8984	-0.552943	-0.629633
				-50.4688	-583.343	-50.0147		-50.4688	-0.576039	-0.658528
				-50.0391	-606.796	-52.1454		-50.0391	-0.599198	-0.686583
				-49.6094	-630.233	-54.1993		-49.6094	-0.622341	-0.713626
				-49.1797	-653.572	-56.1649		-49.1797	-0.645388	-0.739506
				-48.75	-676.731	-58.0325		-48.75	-0.668257	-0.764096
				-48.3203	-699.629	-59.794		-48.3203	-0.690869	-0.78729
				-47.8906	-722.186	-61.4437		-47.8906	-0.713143	-0.809011
				-47.4609	-744.324	-62.9774		-47.4609	-0.735004	-0.829205
				-47.0312	-765.97	-64.3929		-47.0312	-0.756379	-0.847842
				-46.6016	-787.052	-65.6895		-46.6016	-0.777197	-0.864914
				-46.1719	-807.507	-66.8682		-46.1719	-0.797396	-0.880433
				-45.7422	-827.274	-67.931		-45.7422	-0.816916	-0.894427
				-45.3125	-846.301	-68.8814		-45.3125	-0.835704	-0.906941
				-44.8828	-864.539	-69.7235		-44.8828	-0.853714	-0.918029
				-44.4531	-881.951	-70.4622		-44.4531	-0.870907	-0.927754
				-44.0234	-898.501	-71.1028		-44.0234	-0.88725	-0.936188
				-43.5938	-914.164	-71.6509		-43.5938	-0.902717	-0.943406
				-43.1641	-928.92	-72.1126		-43.1641	-0.917289	-0.949485
				-42.7344	-942.757	-72.4937		-42.7344	-0.930952	-0.954503
				-42.3047	-955.667	-72.8001		-42.3047	-0.943701	-0.958537
				-41.875	-967.65	-73.0376		-41.875	-0.955534	-0.961663
				-41.4453	-978.71	-73.2116		-41.4453	-0.966456	-0.963955
				-41.0156	-988.858	-73.3277		-41.0156	-0.976476	-0.965483
				-40.5859	-998.107	-73.3907		-40.5859	-0.98561	-0.966313
				-40.1562	-1006.48	-73.4054		-40.1562	-0.993873	-0.966506
				-39.7266	-1013.99	-73.3763		-39.7266	-1.00129	-0.966123
				-39.2969	-1020.66	-73.3074		-39.2969	-1.00788	-0.965216
				-38.8672	-1026.53	-73.2026		-38.8672	-1.01367	-0.963837
				-38.4375	-1031.61	-73.0654		-38.4375	-1.0187	-0.96203
				-38.0078	-1035.95	-72.8989		-38.0078	-1.02298	-0.959838
				-37.5781	-1039.57	-72.7062		-37.5781	-1.02656	-0.957301
				-37.1484	-1042.51	-72.4898		-37.1484	-1.02945	-0.954452
				-36.7188	-1044.79	-72.2523		-36.7188	-1.0317	-0.951324
				-36.2891	-1046.45	-71.9957		-36.2891	-1.03334	-0.947945
				-35.8594	-1047.51	-71.7221		-35.8594	-1.0344	-0.944343
				-35.4297	-1048.03	-71.4332		-35.4297	-1.0349	-0.94054
				-35	-1048.01	-71.1308		-35	-1.03489	-0.936558
				-34.5703	-1047.5	-70.8162		-34.5703	-1.03438	-0.932415
				-34.1406	-1046.52	-70.4907		-34.1406	-1.03342	-0.928129
				-33.7109	-1045.1	-70.1555		-33.7109	-1.03202	-0.923716
				-33.2812	-1043.27	-69.8116		-33.2812	-1.03021	-0.919189
				-32.8516	-1041.06	-69.4601		-32.8516	-1.02802	-0.91456
				-32.4219	-1038.48	-69.1017		-32.4219	-1.02548	-0.909841
				-31.9922	-1035.57	-68.7371		-31.9922	-1.0226	-0.905041
				-31.5625	-1032.34	-68.3672		-31.5625	-1.01942	-0.90017
				-31.1328	-1028.83	-67.9923		-31.1328	-1.01594	-0.895234
				-30.7031	-1025.03	-67.6131		-30.7031	-1.0122	-0.890242
				-30.2734	-1020.99	-67.2301		-30.2734	-1.0082	-0.885199
				-29.8438	-1016.7	-66.8437		-29.8438	-1.00397	-0.880111
				-29.4141	-1012.2	-66.4543		-29.4141	-0.99953	-0.874983
				-28.9844	-1007.5	-66.0621		-28.9844	-0.994885	-0.86982
				-28.5547	-1002.61	-65.6675		-28.5547	-0.990053	-0.864624
				-28.125	-997.539	-65.2708		-28.125	-0.985049	-0.859401
				-27.6953	-992.31	-64.8722		-27.6953	-0.979885	-0.854153
				-27.2656	-986.931	-64.4719		-27.2656	-0.974573	-0.848882
				-26.8359	-981.413	-64.0701		-26.8359	-0.969125	-0.843592
				-26.4062	-975.768	-63.667		-26.4062	-0.96355	-0.838284
				-25.9766	-970.003	-63.2627		-25.9766	-0.957858	-0.832961
				-25.5469	-964.13	-62.8574		-25.5469	-0.952057	-0.827624
				-25.1172	-958.155	-62.4511		-25.1172	-0.946158	-0.822274
				-24.6875	-952.087	-62.0439		-24.6875	-0.940165	-0.816914
				-24.2578	-945.933	-61.6361		-24.2578	-0.934088	-0.811544
				-23.8281	-939.699	-61.2276		-23.8281	-0.927933	-0.806165
				-23.3984	-933.392	-60.8185		-23.3984	-0.921705	-0.800779
				-22.9688	-927.018	-60.4089		-22.9688	-0.91541	-0.795385
				-22.5391	-920.581	-59.9988		-22.5391	-0.909054	-0.789986
				-22.1094	-914.087	-59.5884		-22.1094	-0.902641	-0.784582
				-21.6797	-907.54	-59.1775		-21.6797	-0.896176	-0.779172
				-21.25	-900.944	-58.7664		-21.25	-0.889663	-0.773759
				-20.8203	-894.304	-58.3549		-20.8203	-0.883106	-0.768342
				-20.3906	-887.622	-57.9432		-20.3906	-0.876508	-0.762921
				-19.9609	-880.902	-57.5313		-19.9609	-0.869872	-0.757498
				-19.5312	-874.147	-57.1192		-19.5312	-0.863202	-0.752072
				-19.1016	-867.36	-56.7069		-19.1016	-0.8565	-0.746643
				-18.6719	-860.544	-56.2945		-18.6719	-0.849769	-0.741213
				-18.2422	-853.7	-55.8819		-18.2422	-0.843011	-0.73578
				-17.8125	-846.831	-55.4692		-17.8125	-0.836228	-0.730346
				-17.3828	-839.939	-55.0564		-17.3828	-0.829422	-0.724911
				-16.9531	-833.026	-54.6435		-16.9531	-0.822595	-0.719474
				-16.5234	-826.093	-54.2305		-16.5234	-0.815749	-0.714036
				-16.0938	-819.143	-53.8174		-16.0938	-0.808886	-0.708598
				-15.6641	-812.176	-53.4043		-15.6641	-0.802006	-0.703158
				-15.2344	-805.193	-52.9911		-15.2344	-0.795111	-0.697718
				-14.8047	-798.197	-52.5778		-14.8047	-0.788203	-0.692276
				-14.375	-791.188	-52.1645		-14.375	-0.781282	-0.686835
				-13.9453	-784.168	-51.7512		-13.9453	-0.774349	-0.681392
				-13.5156	-777.136	-51.3378		-13.5156	-0.767406	-0.675949
				-13.0859	-770.095	-50.9244		-13.0859	-0.760453	-0.670506
				-12.6562	-763.045	-50.511		-12.6562	-0.75349	-0.665062
				-12.2266	-755.986	-50.0975		-12.2266	-0.74652	-0.659618
				-11.7969	-748.919	-49.684		-11.7969	-0.739542	-0.654174
				-11.3672	-741.846	-49.2705		-11.3672	-0.732557	-0.64873
				-10.9375	-734.766	-48.857		-10.9375	-0.725566	-0.643285
				-10.5078	-727.68	-48.4434		-10.5078	-0.718568	-0.63784
				-10.0781	-720.588	-48.0299		-10.0781	-0.711566	-0.632395
				-9.64844	-713.492	-47.6163		-9.64844	-0.704558	-0.626949
				-9.21875	-706.391	-47.2027		-9.21875	-0.697546	-0.621504
				-8.78906	-699.285	-46.7891		-8.78906	-0.690529	-0.616058
				-8.35938	-692.176	-46.3755		-8.35938	-0.683509	-0.610612
				-7.92969	-685.064	-45.9619		-7.92969	-0.676486	-0.605166
				-7.5	-677.948	-45.5483		-7.5	-0.669459	-0.59972
				-7.07031	-670.829	-45.1347		-7.07031	-0.662429	-0.594274
				-6.64062	-663.707	-44.721		-6.64062	-0.655396	-0.588828
				-6.21094	-656.583	-44.3074		-6.21094	-0.648361	-0.583382
				-5.78125	-649.456	-43.8938		-5.78125	-0.641324	-0.577936
				-5.35156	-642.327	-43.4801		-5.35156	-0.634285	-0.57249
				-4.92188	-635.197	-43.0665		-4.92188	-0.627243	-0.567043
				-4.49219	-628.064	-42.6528		-4.49219	-0.6202	-0.561597
				-4.0625	-620.93	-42.2392		-4.0625	-0.613155	-0.556151
				-3.63281	-613.795	-41.8255		-3.63281	-0.606109	-0.550704
				-3.20312	-606.658	-41.4119		-3.20312	-0.599061	-0.545258
				-2.77344	-599.519	-40.9982		-2.77344	-0.592013	-0.539811
				-2.34375	-592.38	-40.5846		-2.34375	-0.584963	-0.534365
				-1.91406	-585.24	-40.1709		-1.91406	-0.577912	-0.528918
				-1.48438	-578.098	-39.7573		-1.48438	-0.57086	-0.523472
				-1.05469	-570.956	-39.3436		-1.05469	-0.563807	-0.518025
				-0.625	-563.813	-38.9299		-0.625	-0.556753	-0.512579
				-0.195312	-556.669	-38.5163		-0.195312	-0.549699	-0.507132
				0.234375	-549.524	-38.1026		0.234375	-0.542644	-0.501685
				0.664062	-542.379	-37.6889		0.664062	-0.535588	-0.496239
				1.09375	-535.233	-37.2753		1.09375	-0.528532	-0.490792
				1.52344	-528.087	-36.8616		1.52344	-0.521475	-0.485346
				1.95312	-520.94	-36.448		1.95312	-0.514418	-0.479899
				2.38281	-513.793	-36.0343		2.38281	-0.50736	-0.474453
				2.8125	-506.646	-35.6206		2.8125	-0.500302	-0.469006
				3.24219	-499.498	-35.207		3.24219	-0.493243	-0.463559
				3.67188	-492.349	-34.7933		3.67188	-0.486185	-0.458113
				4.10156	-485.201	-34.3796		4.10156	-0.479125	-0.452666
				4.53125	-478.052	-33.966		4.53125	-0.472066	-0.447219
				4.96094	-470.903	-33.5523		4.96094	-0.465006	-0.441773
				5.39062	-463.753	-33.1386		5.39062	-0.457946	-0.436326
				5.82031	-456.604	-32.725		5.82031	-0.450886	-0.430879
				6.25	-449.454	-32.3113		6.25	-0.443826	-0.425433
				6.67969	-442.304	-31.8976		6.67969	-0.436766	-0.419986
				7.10938	-435.154	-31.4839		7.10938	-0.429705	-0.41454
				7.53906	-428.003	-31.0703		7.53906	-0.422644	-0.409093
				7.96875	-420.853	-30.6566		7.96875	-0.415583	-0.403646
				8.39844	-413.702	-30.2429		8.39844	-0.408522	-0.3982
				8.82812	-406.552	-29.8293		8.82812	-0.401461	-0.392753
				9.25781	-399.401	-29.4156		9.25781	-0.3944	-0.387306
				9.6875	-392.25	-29.0019		9.6875	-0.387338	-0.38186
				10.1172	-385.099	-28.5883		10.1172	-0.380277	-0.376413
				10.5469	-377.948	-28.1746		10.5469	-0.373215	-0.370966
				10.9766	-370.797	-27.7609		10.9766	-0.366154	-0.36552
				11.4062	-363.645	-27.3473		11.4062	-0.359092	-0.360073
				11.8359	-356.494	-26.9336		11.8359	-0.35203	-0.354626
				12.2656	-349.343	-26.5199		12.2656	-0.344969	-0.34918
				12.6953	-342.191	-26.1063		12.6953	-0.337907	-0.343733
				13.125	-335.04	-25.6926		13.125	-0.330845	-0.338286
				13.5547	-327.888	-25.2789		13.5547	-0.323783	-0.33284
				13.9844	-320.737	-24.8653		13.9844	-0.316721	-0.327393
				14.4141	-313.585	-24.4516		14.4141	-0.309659	-0.321947
				14.8438	-306.434	-24.0379		14.8438	-0.302597	-0.3165
				15.2734	-299.282	-23.6242		15.2734	-0.295535	-0.311053
				15.7031	-292.131	-23.2106		15.7031	-0.288473	-0.305607
				16.1328	-284.979	-22.7969		16.1328	-0.281411	-0.30016
				16.5625	-277.827	-22.3832		16.5625	-0.274348	-0.294713
				16.9922	-270.675	-21.9696		16.9922	-0.267286	-0.289267
				17.4219	-263.524	-21.5559		17.4219	-0.260224	-0.28382
				17.8516	-256.372	-21.1422		17.8516	-0.253162	-0.278373
				18.2812	-249.22	-20.7286		18.2812	-0.2461	-0.272927
				18.7109	-242.068	-20.3149		18.7109	-0.239037	-0.26748
				19.1406	-234.917	-19.9012		19.1406	-0.231975	-0.262033
				19.5703	-227.765	-19.4876		19.5703	-0.224913	-0.256587
				20	-220.613	-19.0739		20	-0.217851	-0.25114

## Sheet: Fig.S2g
Supplementary Figure S2
Supplementary Figure S2 g
CaV3.2
	Vhalf (mV)
	n1	n2	n3
Vehicle	-48.6574	-47.6497	-40.5061
1 μM ML218	-51.6233	-51.3484	-36.6456

## Sheet: Fig.S2h
Supplementary Figure S2
Supplementary Figure S2 h
CaV3.2
	ICa (pA)
	n1	n2	n3
Vehicle	-1012.68	-489.992	-742.48
1 μM ML218	-75.9492	-27.989	-51.5031
