# Supplementary material for: A non-conducting role of the Cav1.4 Ca2+ channel drives homeostatic plasticity at the cone photoreceptor synapse
Source: eLife. 2024 Nov 12;13:RP94908. doi: 10.7554/eLife.94908 (PMC11556788; doi:10.7554/eLife.94908)
Supplement: Figure 3—source data 1. [file elife-94908-fig3-data1.xlsx]

## Sheet: Sheet1
Figure 3b: Isradipine wash-on
wild type	wild type + Isradipine	G369i KI	G369i KI + Isradipine
-73.48	-14.49	-10.43	-5.71
-80.15	-17.07	-9.05	-5.17
-50.18	-20.08	-3.08	-2.34
-82.98	-17	-7.51	-4.35
		-7.78	-6.07
Figure 3d: ML 218 wash-on
WT	WT + ML218	G369i KI	G369i KI + ML218
-29.99	-37.93	-7.91	-0.86
-26.53	-16.39	-5.09	-2.51
-20.23	-17.82	-7.79	-0.68
-33.88	-25.65	-10.41	-1.78
-34.04	-23.43	-7.2	-1.71
