# Supplementary material for: A non-conducting role of the Cav1.4 Ca2+ channel drives homeostatic plasticity at the cone photoreceptor synapse
Source: eLife. 2024 Nov 12;13:RP94908. doi: 10.7554/eLife.94908 (PMC11556788; doi:10.7554/eLife.94908)
Supplement: Figure 4—source data 1. [file elife-94908-fig4-data1.xlsx]

## Sheet: Fig.4a
Figure 4, Panel A
Voltage (mV)	Current (pA)
	Baseline	ML218
-84.7	-3.57407	-2.91782
-84.6	-1.20986	-1.17861
-84.5	-1.86144	-1.06457
-84.4	0.455559	-0.622566
-84.3	-0.305733	-1.55573
-84.2	1.12031	-1.11406
-84.1	-1.01631	1.59306
-84	-0.981222	1.92503
-83.9	-0.602545	2.27246
-83.8	0.104095	0.83847
-83.7	1.31057	1.34182
-83.6	0.563768	-0.123732
-83.5	-0.136322	0.301178
-83.4	1.58531	-0.64907
-83.3	0.338025	1.15053
-83.2	0.965589	2.12184
-83.1	1.51487	1.1555
-83	0.517127	1.17338
-82.9	0.987978	1.98798
-82.8	0.224302	-0.0413235
-82.7	0.601099	1.11672
-82.6	0.993371	0.962121
-82.5	-0.0832555	1.57299
-82.4	-0.425656	-0.0194057
-82.3	2.20055	1.1068
-82.2	1.49848	0.529728
-82.1	-2.03186	-1.51624
-82	1.07828	0.515781
-81.9	-0.671095	0.797655
-81.8	-0.0924888	0.985636
-81.7	1.20473	0.407852
-81.6	1.14243	0.111177
-81.5	0.423738	1.32999
-81.4	0.173661	0.767411
-81.3	0.860947	-0.0609276
-81.2	1.12622	1.81372
-81.1	-0.514887	1.07886
-81	1.20324	1.92199
-80.9	0.796244	1.90562
-80.8	0.967236	1.09224
-80.7	1.6381	0.731847
-80.6	0.371329	-0.238046
-80.5	1.13568	1.10443
-80.4	0.618659	2.82178
-80.3	0.210884	1.33588
-80.2	0.334233	0.209233
-80.1	3.05121	2.01996
-80	0.377436	3.15869
-79.9	-0.0308333	1.68792
-79.8	1.73265	1.42015
-79.7	1.62102	0.980391
-79.6	0.196762	0.618637
-79.5	-0.524484	1.42864
-79.4	0.785403	1.45728
-79.3	3.2983	1.7358
-79.2	0.873582	1.34233
-79.1	1.605	1.355
-79	0.773808	0.242558
-78.9	0.98938	1.48938
-78.8	0.329841	1.22047
-78.7	1.10769	1.21707
-78.6	-0.17706	2.01044
-78.5	1.2412	2.20995
-78.4	1.37811	1.04999
-78.3	1.67117	-0.156958
-78.2	-0.160882	1.41724
-78.1	1.24134	0.194467
-78	0.830966	0.237216
-77.9	-1.01701	0.998615
-77.8	0.713041	0.275541
-77.7	0.536744	1.08362
-77.6	0.172851	1.21973
-77.5	1.01199	0.574488
-77.4	0.35103	0.929155
-77.3	1.50248	0.924355
-77.2	0.638214	0.825714
-77.1	0.695731	0.336356
-77	1.84691	-0.74684
-76.9	3.0605	0.888625
-76.8	1.774	1.399
-76.7	0.721795	1.2218
-76.6	0.560127	1.21638
-76.5	3.36713	1.82025
-76.4	1.47092	0.767792
-76.3	-1.67537	0.965251
-76.2	1.86576	1.13138
-76.1	1.78181	1.92243
-76	-0.0209718	1.0259
-75.9	2.2543	0.457424
-75.8	0.841994	2.01387
-75.7	1.83586	2.32024
-75.6	0.845286	1.15779
-75.5	3.32339	1.15151
-75.4	0.223289	1.98891
-75.3	2.59187	2.21687
-75.2	1.74164	1.69476
-75.1	-0.0617899	0.141335
-75	0.650341	1.35347
-74.9	0.596781	1.34678
-74.8	2.15253	1.94941
-74.7	0.614471	1.61447
-74.6	1.09197	0.654472
-74.5	2.44441	0.0850371
-74.4	1.68742	0.890543
-74.3	2.16474	0.78974
-74.2	1.75138	0.72013
-74.1	1.97859	0.572338
-74	1.45574	0.221366
-73.9	2.27659	2.30784
-73.8	0.956762	0.00363701
-73.7	0.793132	0.480632
-73.6	2.62945	0.176326
-73.5	-1.08115	0.27822
-73.4	1.56757	2.23944
-73.3	0.49749	-1.14313
-73.2	2.06799	1.08362
-73.1	1.12283	1.1072
-73	-0.197386	0.880739
-72.9	2.65424	0.13861
-72.8	1.20894	0.177689
-72.7	0.810478	1.8261
-72.6	1.53698	1.91198
-72.5	3.90406	1.87281
-72.4	2.30236	1.72424
-72.3	-0.190002	0.606873
-72.2	1.95823	1.6301
-72.1	0.028293	1.30954
-72	1.0202	0.567078
-71.9	1.05896	0.324581
-71.8	1.16018	1.78518
-71.7	2.402	2.43325
-71.6	4.23754	1.12816
-71.5	1.51055	1.9793
-71.4	2.93978	1.17416
-71.3	2.77524	1.41587
-71.2	2.90755	1.6888
-71.1	3.05546	-0.225786
-71	2.45335	1.12523
-70.9	1.78872	0.679347
-70.8	2.29595	-0.329055
-70.7	4.10002	0.912524
-70.6	1.12284	0.310335
-70.5	1.58313	2.14563
-70.4	3.73091	1.27778
-70.3	0.175545	0.175545
-70.2	2.33892	1.05767
-70.1	1.92416	0.486656
-70	2.0875	1.44688
-69.9	2.45397	0.313343
-69.8	2.83605	1.07042
-69.7	2.71812	0.593116
-69.6	1.8033	4.14705
-69.5	0.0291067	0.0759817
-69.4	2.72366	2.19241
-69.3	0.918199	1.07445
-69.2	1.86274	0.956488
-69.1	2.18227	1.80727
-69	2.62681	-0.0763156
-68.9	2.46197	1.33697
-68.8	1.89088	0.547126
-68.7	1.88229	1.50729
-68.6	3.23307	0.967446
-68.5	1.95886	2.05261
-68.4	0.419026	2.0284
-68.3	3.2542	0.207323
-68.2	2.88625	1.40188
-68.1	2.37768	1.90893
-68	2.69725	2.1035
-67.9	2.23557	0.204324
-67.8	2.30516	1.36766
-67.7	1.87475	1.85913
-67.6	3.02248	1.08498
-67.5	3.54522	1.8421
-67.4	1.38047	2.4586
-67.3	0.512616	0.793866
-67.2	3.58227	0.238522
-67.1	1.91757	0.776944
-67	2.76851	1.89351
-66.9	2.07259	1.71321
-66.8	1.78293	0.0954343
-66.7	2.60268	1.02455
-66.6	2.95369	2.37556
-66.5	1.97659	2.74222
-66.4	1.53077	0.593269
-66.3	1.44434	1.80372
-66.2	1.34231	0.186065
-66.1	2.25594	2.83406
-66	2.98208	0.841455
-65.9	3.052	0.895749
-65.8	3.04382	1.62194
-65.7	1.67629	1.14504
-65.6	2.19942	1.44942
-65.5	0.956943	0.363193
-65.4	1.777	0.667625
-65.3	2.36271	1.03459
-65.2	1.71408	1.27658
-65.1	1.48735	2.31547
-65	3.01065	0.448153
-64.9	0.31524	0.00273967
-64.8	-0.848891	0.604234
-64.7	2.17451	1.92451
-64.6	1.05733	1.33858
-64.5	0.408924	-0.497326
-64.4	2.16681	-0.911316
-64.3	2.67473	1.61223
-64.2	2.30769	0.370188
-64.1	0.440684	1.61256
-64	2.40184	2.19872
-63.9	2.09742	0.347417
-63.8	2.30866	1.82428
-63.7	0.551184	0.754309
-63.6	3.34063	1.27813
-63.5	1.13011	-0.22926
-63.4	2.06027	-0.220982
-63.3	0.771715	0.396715
-63.2	0.123829	2.2957
-63.1	2.27286	0.757238
-63	3.09382	-1.68743
-62.9	2.05544	0.602314
-62.8	0.0796073	1.06398
-62.7	0.353822	1.49445
-62.6	3.42496	1.97183
-62.5	-0.331983	1.21489
-62.4	3.333	1.333
-62.3	1.31053	-0.548848
-62.2	0.741229	0.959979
-62.1	1.43761	0.437606
-62	0.00903283	1.18091
-61.9	-0.0288657	1.42426
-61.8	1.91766	1.33954
-61.7	1.45799	1.61424
-61.6	1.82649	0.0139937
-61.5	2.02317	-1.42995
-61.4	1.43866	0.641783
-61.3	3.15107	-0.239556
-61.2	0.988533	0.519783
-61.1	1.01355	0.279176
-61	0.116747	-0.820753
-60.9	3.07937	-1.3425
-60.8	0.651428	-0.442322
-60.7	0.129788	0.661038
-60.6	0.545704	0.873829
-60.5	1.99292	-0.538325
-60.4	1.72145	-1.20042
-60.3	2.80941	-0.706215
-60.2	0.803674	0.272424
-60.1	-0.545754	0.610496
-60	0.9955	0.40175
-59.9	0.583686	-0.0725638
-59.8	2.29693	1.50006
-59.7	2.16648	0.994607
-59.6	1.28609	-0.323283
-59.5	-0.297364	-0.000488849
-59.4	0.931739	0.431739
-59.3	1.3484	-0.37035
-59.2	1.40575	0.280746
-59.1	2.29128	1.63503
-59	0.84874	1.08312
-58.9	1.37501	0.671889
-58.8	1.85447	0.713849
-58.7	-0.0878821	-0.00975706
-58.6	1.28232	-0.405177
-58.5	1.57446	-0.316162
-58.4	1.63229	0.726038
-58.3	2.11205	-0.6067
-58.2	1.82625	-0.173753
-58.1	-0.72512	0.290505
-58	2.0517	-1.24518
-57.9	0.906704	-0.468296
-57.8	-0.36323	0.10552
-57.7	1.96065	1.64815
-57.6	0.487712	-0.715413
-57.5	1.13984	-0.125788
-57.4	1.2764	-0.145476
-57.3	-0.149478	0.881772
-57.2	1.98721	-0.747168
-57.1	0.155204	-0.0322965
-57	0.963886	-0.489239
-56.9	0.475756	-0.805494
-56.8	2.11269	2.15956
-56.7	0.187179	-0.0628215
-56.6	1.54298	-0.800768
-56.5	0.351972	-3.1949
-56.4	0.473524	-1.55773
-56.3	0.173261	-0.451739
-56.2	0.763685	-0.81444
-56.1	0.776045	-0.64583
-56	0.429091	-0.180284
-55.9	-1.2303	-1.9803
-55.8	1.11037	-1.56151
-55.7	1.40422	-0.502032
-55.6	1.97938	-1.08312
-55.5	0.0702312	-0.226644
-55.4	-1.15136	-0.979484
-55.3	2.40836	-1.18539
-55.2	2.23376	-1.15686
-55.1	2.19985	0.0279784
-55	1.49413	-2.459
-54.9	0.585335	-1.52404
-54.8	0.192227	-1.35465
-54.7	-0.0445724	-0.622697
-54.6	-0.406313	-2.12506
-54.5	2.62263	-2.00237
-54.4	-0.035869	-2.06712
-54.3	0.758815	-2.13181
-54.2	0.772306	-1.24332
-54.1	0.30148	-2.15164
-54	0.643211	-1.37241
-53.9	0.672499	-1.21813
-53.8	-1.65753	-2.29816
-53.7	-1.00313	-2.05001
-53.6	0.682574	-1.9893
-53.5	3.44646	-1.56916
-53.4	-1.1021	-3.39897
-53.3	-1.47873	-1.55685
-53.2	0.488449	-0.292801
-53.1	1.48693	-1.18495
-53	-0.530163	-1.95204
-52.9	1.42155	-4.15658
-52.8	0.732688	-1.11106
-52.7	1.1845	-1.3155
-52.6	-2.17613	-2.33238
-52.5	1.04142	-1.00546
-52.4	-2.24099	-0.94411
-52.3	0.211037	-2.00771
-52.2	0.975609	-2.00877
-52.1	-0.54102	-2.66602
-52	-1.1826	-2.76072
-51.9	-0.417879	-2.08975
-51.8	0.300014	-3.35624
-51.7	-1.02892	-2.5758
-51.6	-0.154683	-2.51406
-51.5	-0.342898	-3.23352
-51.4	-0.827943	-3.49982
-51.3	0.546433	-3.26607
-51.2	-0.782271	-3.01665
-51.1	-1.07968	-3.82968
-51	-0.127045	-2.48642
-50.9	-0.471243	-1.92437
-50.8	-1.90915	-2.22165
-50.7	-0.75326	-3.81576
-50.6	-1.69108	-2.36296
-50.5	-1.28511	-3.95699
-50.4	-3.51973	-3.30098
-50.3	-2.03555	-3.91055
-50.2	-2.20759	-3.22321
-50.1	-3.42646	-3.12959
-50	-2.0828	-3.75467
-49.9	-1.87972	-4.16097
-49.8	-3.72348	-3.41098
-49.7	-2.11408	-3.86408
-49.6	-3.70777	-3.64527
-49.5	-1.14518	-5.61393
-49.4	-1.30131	-5.42631
-49.3	-1.2074	-5.2699
-49.2	-3.89471	-5.51971
-49.1	-3.39448	-4.53511
-49	-1.37861	-4.25361
-48.9	-1.6127	-5.4252
-48.8	-3.83114	-4.56551
-48.7	-4.12767	-6.00267
-48.6	-3.92418	-6.72105
-48.5	-4.18941	-6.29879
-48.4	-4.95462	-5.98587
-48.3	-3.23542	-6.98542
-48.2	-2.71933	-5.98495
-48.1	-5.29696	-5.48446
-48	-6.10895	-7.59332
-47.9	-5.28028	-7.87403
-47.8	-3.31098	-5.15473
-47.7	-4.8104	-6.45102
-47.6	-3.7473	-7.09105
-47.5	-5.74669	-7.44981
-47.4	-4.98043	-7.94918
-47.3	-6.22978	-9.02665
-47.2	-7.46349	-8.19786
-47.1	-7.50968	-7.40031
-47	-4.96211	-7.79024
-46.9	-7.96141	-9.19578
-46.8	-8.02319	-10.4294
-46.7	-6.63183	-8.41308
-46.6	-7.17797	-9.47484
-46.5	-7.50535	-10.4272
-46.4	-7.27021	-8.81709
-46.3	-8.66007	-9.8632
-46.2	-6.81555	-10.5031
-46.1	-8.59603	-11.1898
-46	-8.39212	-10.6421
-45.9	-7.96946	-11.8913
-45.8	-6.9218	-12.0468
-45.7	-10.8585	-11.4835
-45.6	-9.42022	-12.0765
-45.5	-8.51318	-12.3257
-45.4	-9.93427	-11.9343
-45.3	-10.1522	-12.9491
-45.2	-10.5421	-14.464
-45.1	-11.1663	-12.3851
-45	-11.1343	-15.3218
-44.9	-10.1179	-12.3835
-44.8	-9.92964	-14.539
-44.7	-11.5539	-14.007
-44.6	-11.5375	-13.9125
-44.5	-9.77118	-16.0837
-44.4	-12.4736	-15.3173
-44.3	-11.0979	-17.4416
-44.2	-12.5191	-15.7378
-44.1	-12.0653	-15.9247
-44	-13.0334	-17.8928
-43.9	-12.5171	-16.5484
-43.8	-13.2665	-16.3134
-43.7	-14.9065	-19.1253
-43.6	-14.0466	-16.8903
-43.5	-15.1085	-16.6241
-43.4	-16.4049	-17.2174
-43.3	-14.9669	-16.67
-43.2	-16.7945	-19.4039
-43.1	-17.9034	-20.044
-43	-18.0592	-20.2311
-42.9	-17.1213	-20.2776
-42.8	-19.2147	-20.6678
-42.7	-15.5425	-21.2925
-42.6	-19.7766	-21.8703
-42.5	-18.1201	-21.8701
-42.4	-19.2604	-20.8698
-42.3	-18.6509	-22.2915
-42.2	-19.8382	-23.0413
-42.1	-20.8693	-23.8693
-42	-20.2755	-22.7911
-41.9	-21.2911	-23.6817
-41.8	-22.7129	-24.4786
-41.7	-21.0723	-23.963
-41.6	-22.3537	-26.2131
-41.5	-22.9944	-27.1507
-41.4	-24.3384	-26.104
-41.3	-24.9011	-26.198
-41.2	-26.3076	-27.1514
-41.1	-24.9173	-28.5892
-41	-25.3708	-26.0427
-40.9	-25.3556	-25.6212
-40.8	-27.5905	-28.8561
-40.7	-26.4348	-28.9035
-40.6	-28.1541	-28.8885
-40.5	-27.8891	-29.686
-40.4	-28.718	-29.1711
-40.3	-28.2344	-29.9375
-40.2	-27.7352	-29.7196
-40.1	-29.3767	-30.3455
-40	-30.9089	-32.1433
-39.9	-29.1599	-30.9724
-39.8	-32.0985	-31.2548
-39.7	-29.4591	-35.0216
-39.6	-32.6634	-31.8197
-39.5	-29.8522	-33.3678
-39.4	-31.5255	-34.4786
-39.3	-33.48	-35.4957
-39.2	-33.9503	-34.1222
-39.1	-35.2019	-34.1863
-39	-33.9067	-35.4379
-38.9	-38.3459	-36.2209
-38.8	-34.8478	-35.4728
-38.7	-38.0997	-35.1622
-38.6	-36.4767	-36.4142
-38.5	-37.4006	-36.2288
-38.4	-38.5278	-37.5278
-38.3	-39.7332	-37.7644
-38.2	-38.5636	-38.5167
-38.1	-41.191	-38.8629
-38	-41.0842	-37.9904
-37.9	-40.6493	-39.2118
-37.8	-41.027	-39.3082
-37.7	-41.4829	-40.686
-37.6	-41.1108	-39.7201
-37.5	-42.8481	-40.52
-37.4	-44.3512	-42.4449
-37.3	-45.9012	-41.12
-37.2	-46.2795	-41.7014
-37.1	-44.1891	-42.2048
-37	-45.552	-41.927
-36.9	-45.2743	-42.3837
-36.8	-45.6999	-42.5749
-36.7	-45.6881	-45.0006
-36.6	-47.5201	-43.5982
-36.5	-46.6179	-44.4304
-36.4	-48.7314	-44.7782
-36.3	-49.6731	-43.1887
-36.2	-48.2868	-43.8649
-36.1	-47.9007	-44.885
-36	-49.5459	-46.2959
-35.9	-50.4881	-44.0662
-35.8	-51.9929	-46.0866
-35.7	-49.8416	-44.2166
-35.6	-51.0966	-44.8466
-35.5	-51.883	-44.4612
-35.4	-51.404	-45.3883
-35.3	-55.4563	-45.9875
-35.2	-53.1962	-46.6649
-35.1	-52.2487	-47.655
-35	-54.6608	-44.7858
-34.9	-55.7917	-45.1042
-34.8	-55.5791	-44.4072
-34.7	-55.9915	-46.4134
-34.6	-56.201	-47.2791
-34.5	-55.5043	-47.6293
-34.4	-56.3547	-47.1359
-34.3	-56.5802	-48.627
-34.2	-57.212	-48.5245
-34.1	-56.2191	-49.3284
-34	-56.6481	-48.945
-33.9	-57.0929	-49.0929
-33.8	-59.4441	-47.5691
-33.7	-57.5923	-49.6079
-33.6	-56.5844	-49.8032
-33.5	-59.1861	-49.9204
-33.4	-59.2097	-49.6004
-33.3	-60.1242	-47.8273
-33.2	-59.7888	-50.0544
-33.1	-61.2191	-49.516
-33	-60.6809	-48.5403
-32.9	-60.9709	-49.2522
-32.8	-60.9643	-51.2455
-32.7	-60.2078	-48.4265
-32.6	-59.967	-49.8889
-32.5	-62.8983	-49.6483
-32.4	-62.5173	-50.1423
-32.3	-63.2458	-49.8396
-32.2	-64.4745	-49.1776
-32.1	-61.6252	-51.5471
-32	-62.7136	-50.6979
-31.9	-63.849	-49.9896
-31.8	-63.6721	-51.2189
-31.7	-64.4328	-51.2453
-31.6	-64.2406	-51.6156
-31.5	-64.3298	-52.1267
-31.4	-63.013	-51.1849
-31.3	-65.1494	-50.9619
-31.2	-63.7235	-49.9735
-31.1	-63.2822	-49.751
-31	-66.3567	-51.6692
-30.9	-66.6657	-51.0876
-30.8	-65.4437	-51.4124
-30.7	-64.3624	-52.4562
-30.6	-66.8282	-51.8595
-30.5	-65.1692	-51.4817
-30.4	-65.9479	-52.4792
-30.3	-65.8206	-51.8987
-30.2	-66.7402	-52.1465
-30.1	-67.4414	-52.0976
-30	-66.9239	-51.9083
-29.9	-66.4535	-51.766
-29.8	-69.5302	-52.8115
-29.7	-68.5759	-51.7634
-29.6	-67.1061	-52.8092
-29.5	-68.7146	-53.0583
-29.4	-68.7764	-53.417
-29.3	-68.5884	-54.8853
-29.2	-66.5257	-52.6663
-29.1	-68.5881	-54.7912
-29	-68.6507	-52.8695
-28.9	-66.8073	-51.7761
-28.8	-67.7141	-53.6516
-28.7	-67.7148	-53.1054
-28.6	-67.4189	-52.3876
-28.5	-68.5606	-53.2794
-28.4	-68.5307	-51.4214
-28.3	-68.5323	-54.0167
-28.2	-67.8934	-52.8934
-28.1	-67.911	-52.5048
-28	-68.8663	-53.6944
-27.9	-67.6656	-53.6656
-27.8	-70.1057	-52.34
-27.7	-68.0772	-52.4679
-27.6	-68.6896	-53.4084
-27.5	-67.5991	-52.521
-27.4	-69.4619	-53.1182
-27.3	-68.3719	-53.0281
-27.2	-69.5945	-53.1882
-27.1	-68.7392	-52.0673
-27	-69.0404	-52.6654
-26.9	-70.1543	-51.8418
-26.8	-71.5653	-53.4716
-26.7	-68.9609	-51.8984
-26.6	-70.4505	-54.013
-26.5	-68.784	-51.5497
-26.4	-69.5397	-53.8522
-26.3	-71.3581	-52.3581
-26.2	-72.0985	-51.7079
-26.1	-70.9017	-53.058
-26	-68.0801	-53.0333
-25.9	-69.5869	-50.7119
-25.8	-69.4845	-52.797
-25.7	-70.7886	-51.9761
-25.6	-69.2649	-51.5774
-25.5	-69.3038	-51.8819
-25.4	-73.1086	-54.5773
-25.3	-70.273	-51.648
-25.2	-70.3439	-52.922
-25.1	-68.8212	-52.5712
-25	-71.3301	-50.5645
-24.9	-69.1517	-52.8079
-24.8	-70.5204	-51.8641
-24.7	-69.4049	-51.1706
-24.6	-68.8991	-51.6491
-24.5	-68.2529	-51.206
-24.4	-72.0757	-50.9663
-24.3	-71.6331	-51.4768
-24.2	-68.9563	-52.5501
-24.1	-70.5767	-49.8892
-24	-67.3535	-50.291
-23.9	-70.6463	-52.0369
-23.8	-69.3611	-51.658
-23.7	-70.3731	-50.8887
-23.6	-70.5415	-49.7134
-23.5	-68.7102	-50.9446
-23.4	-70.1291	-52.9729
-23.3	-70.0952	-51.7202
-23.2	-69.5615	-51.8115
-23.1	-68.3874	-53.653
-23	-68.573	-49.1511
-22.9	-71.29	-52.165
-22.8	-69.6948	-51.6792
-22.7	-70.0217	-50.2873
-22.6	-69.4426	-50.677
-22.5	-67.9731	-50.3638
-22.4	-70.0664	-49.5664
-22.3	-70.9724	-51.2381
-22.2	-70.0194	-49.5975
-22.1	-69.6134	-49.254
-22	-67.5514	-48.7545
-21.9	-72.3334	-51.3334
-21.8	-69.022	-51.4439
-21.7	-68.5545	-51.1014
-21.6	-70.2748	-49.5717
-21.5	-68.6672	-50.0578
-21.4	-69.0443	-50.1849
-21.3	-68.1091	-50.9372
-21.2	-69.7522	-49.2522
-21.1	-69.38	-49.7394
-21	-68.2425	-49.9144
-20.9	-69.4958	-49.1989
-20.8	-68.7494	-50.8587
-20.7	-69.7219	-49.4094
-20.6	-68.7729	-48.2416
-20.5	-66.7147	-47.2928
-20.4	-68.2349	-49.8912
-20.3	-67.0054	-50.3179
-20.2	-68.3855	-48.4324
-20.1	-69.3752	-49.344
-20	-67.9121	-47.084
-19.9	-68.2617	-48.2617
-19.8	-66.8772	-49.7835
-19.7	-66.7742	-48.2274
-19.6	-67.7809	-48.2965
-19.5	-67.6784	-46.1003
-19.4	-70.0606	-49.0918
-19.3	-67.2867	-48.6773
-19.2	-64.7788	-47.0288
-19.1	-68.6148	-47.1304
-19	-66.4668	-46.248
-18.9	-70.3814	-48.6471
-18.8	-66.7495	-46.5308
-18.7	-66.8835	-46.3366
-18.6	-67.2833	-48.1115
-18.5	-65.9178	-46.7147
-18.4	-67.5057	-48.4744
-18.3	-65.6407	-45.7657
-18.2	-66.604	-46.4009
-18.1	-68.0052	-46.5677
-18	-63.8284	-44.6097
-17.9	-67.7613	-47.5113
-17.8	-66.632	-46.4132
-17.7	-65.8466	-46.7998
-17.6	-66.9991	-45.7491
-17.5	-67.1361	-45.683
-17.4	-67.2422	-46.6641
-17.3	-65.9891	-46.661
-17.2	-64.5644	-45.3769
-17.1	-63.6713	-45.3588
-17	-66.2159	-44.3877
-16.9	-66.542	-46.7607
-16.8	-67.2277	-44.5089
-16.7	-66.5855	-45.1012
-16.6	-65.4437	-45.6624
-16.5	-63.3333	-44.7708
-16.4	-66.9731	-45.4419
-16.3	-66.5039	-44.5351
-16.2	-65.0818	-44.9412
-16.1	-64.5193	-46.5818
-16	-65.1914	-42.8164
-15.9	-66.6607	-43.3013
-15.8	-65.5521	-43.9896
-15.7	-64.0219	-44.0375
-15.6	-64.07	-42.6482
-15.5	-63.1341	-41.2434
-15.4	-66.839	-43.9171
-15.3	-64.091	-45.1223
-15.2	-65.4214	-42.8746
-15.1	-64.4083	-43.5021
-15	-62.7236	-41.0986
-14.9	-64.0861	-44.1173
-14.8	-64.6675	-43.2925
-14.7	-63.1554	-42.4835
-14.6	-62.3154	-42.0029
-14.5	-62.1788	-41.8976
-14.4	-63.4019	-42.5738
-14.3	-62.047	-43.4064
-14.2	-63.2862	-42.9893
-14.1	-65.0568	-42.6037
-14	-62.7965	-41.2652
-13.9	-63.2551	-42.3958
-13.8	-63.0265	-41.2453
-13.7	-61.1575	-44.0325
-13.6	-62.7107	-41.1482
-13.5	-60.8578	-39.9672
-13.4	-62.1926	-42.6458
-13.3	-61.4965	-42.9965
-13.2	-61.5662	-40.5662
-13.1	-61.9643	-42.8237
-13	-58.6908	-39.0189
-12.9	-61.8237	-42.4331
-12.8	-62.1913	-40.1288
-12.7	-60.2934	-39.0434
-12.6	-62.2396	-41.5521
-12.5	-57.8735	-41.2328
-12.4	-61.3513	-40.7576
-12.3	-60.4857	-39.4857
-12.2	-58.7453	-39.9016
-12.1	-61.0676	-40.4895
-12	-57.1558	-40.4215
-11.9	-61.3849	-42.4161
-11.8	-60.8173	-37.8798
-11.7	-59.2343	-38.9062
-11.6	-60.3703	-40.464
-11.5	-57.2409	-39.6002
-11.4	-60.0179	-41.2523
-11.3	-58.9827	-39.1859
-11.2	-57.5571	-37.9165
-11.1	-59.4443	-40.5068
-11	-57.2066	-37.3785
-10.9	-60.3286	-40.4536
-10.8	-57.6695	-38.5132
-10.7	-58.3387	-37.2919
-10.6	-54.852	-36.0082
-10.5	-59.3029	-37.9279
-10.4	-59.2697	-39.3322
-10.3	-57.8774	-39.4555
-10.2	-57.454	-37.7196
-10.1	-56.5152	-36.5777
-10	-55.9829	-38.2798
-9.9	-57.1539	-36.982
-9.8	-58.9345	-37.1376
-9.7	-56.2465	-36.7153
-9.6	-55.6213	-36.5276
-9.5	-55.9963	-36.0901
-9.4	-57.3559	-36.4809
-9.3	-55.4969	-36.7781
-9.2	-55.3569	-35.31
-9.1	-55.5452	-33.6702
-9	-56.6712	-36.5306
-8.9	-54.7662	-37.6724
-8.8	-55.1426	-36.0488
-8.7	-57.1755	-36.613
-8.6	-54.2554	-34.6148
-8.5	-54.4762	-34.4606
-8.4	-57.0409	-37.1347
-8.3	-54.059	-34.0902
-8.2	-54.2334	-33.8428
-8.1	-52.7675	-33.4706
-8	-54.1455	-31.3174
-7.9	-55.3362	-35.0081
-7.8	-55.2615	-35.3083
-7.7	-53.4838	-33.9525
-7.6	-53.3782	-32.8938
-7.5	-51.6165	-35.6634
-7.4	-53.4956	-35.4644
-7.3	-53.9687	-33.6562
-7.2	-51.317	-32.1607
-7.1	-49.6185	-31.6966
-7	-52.2015	-33.9515
-6.9	-51.8159	-35.8472
-6.8	-51.9774	-32.6961
-6.7	-54.7484	-33.7484
-6.6	-49.4728	-32.4259
-6.5	-50.291	-31.6973
-6.4	-53.5	-32.875
-6.3	-52.1936	-32.1468
-6.2	-50.2468	-32.4968
-6.1	-48.9563	-33.1126
-6	-50.6817	-32.3223
-5.9	-53.126	-33.6103
-5.8	-51.586	-31.5079
-5.7	-51.39	-31.265
-5.6	-49.1316	-30.0535
-5.5	-50.2953	-32.6234
-5.4	-52.506	-32.5528
-5.3	-51.3574	-31.4512
-5.2	-49.8653	-31.6778
-5.1	-48.2327	-28.1546
-5	-48.3659	-31.1316
-4.9	-50.7024	-31.1399
-4.8	-49.4297	-30.3984
-4.7	-50.5164	-31.3602
-4.6	-48.7596	-29.9783
-4.5	-47.0029	-30.5654
-4.4	-49.5745	-31.1526
-4.3	-48.6462	-31.4587
-4.2	-47.9681	-28.7962
-4.1	-47.0244	-28.7588
-4	-48.0341	-31.3778
-3.9	-49.6532	-31.122
-3.8	-47.4756	-28.7725
-3.7	-47.1888	-30.1107
-3.6	-46.8396	-28.5583
-3.5	-45.6624	-27.7874
-3.4	-48.1728	-29.8916
-3.3	-45.7146	-29.4959
-3.2	-47.3972	-28.569
-3.1	-46.3611	-27.658
-3	-46.3877	-28.2158
-2.9	-48.2112	-28.1487
-2.8	-44.5192	-30.8005
-2.7	-45.343	-27.4993
-2.6	-44.2763	-27.6669
-2.5	-44.4909	-28.4128
-2.4	-47.19	-27.94
-2.3	-45.9049	-26.4361
-2.2	-44.6198	-27.2605
-2.1	-43.4912	-26.9287
-2	-46.4251	-27.2532
-1.9	-44.9216	-28.2966
-1.8	-44.4026	-27.7776
-1.7	-43.2118	-26.5087
-1.6	-42.9274	-26.2555
-1.5	-44.8931	-27.2368
-1.4	-46.5776	-26.4526
-1.3	-43.7935	-24.9966
-1.2	-44.5094	-28.275
-1.1	-44.1629	-24.0067
-1	-43.2072	-26.8791
-0.9	-42.4078	-26.814
-0.8	-42.3897	-26.7959
-0.7	-42.3561	-25.1686
-0.6	-42.3225	-23.4788
-0.5	-42.0078	-24.8203
-0.4	-42.5994	-25.5525
-0.3	-42.4723	-25.2848
-0.2	-42.7985	-24.3141
-0.1	-40.7184	-24.6716
0	-40.0447	-24.3103
0.1	-42.1054	-24.6367
0.2	-40.3381	-23.3224
0.3	-43.2114	-24.1489
0.4	-41.9129	-23.9911
0.5	-42.1145	-26.0989
0.6	-39.9412	-23.1131
0.7	-42.8929	-23.7366
0.8	-42.0009	-24.0478
0.9	-38.1871	-21.7183
1	-39.7952	-22.6077
1.1	-40.8721	-24.9346
1.2	-41.5428	-24.9959
1.3	-41.6511	-23.4636
1.4	-37.8688	-22.8531
1.5	-38.899	-23.3365
1.6	-40.4917	-23.0073
1.7	-39.6783	-25.2095
1.8	-38.3336	-22.9586
1.9	-40.1139	-22.7233
2	-39.4412	-22.7068
2.1	-39.9716	-23.081
2.2	-40.0802	-23.0177
2.3	-38.5951	-21.9857
2.4	-36.8131	-21.1099
2.5	-38.0623	-21.7342
2.6	-37.8585	-22.0616
2.7	-38.5922	-22.8422
2.8	-39.4196	-23.0915
2.9	-37.9034	-20.5752
3	-37.7933	-21.6371
3.1	-37.699	-22.3865
3.2	-38.4015	-23.1046
3.3	-37.1665	-20.8383
3.4	-37.7127	-20.119
3.5	-37.2746	-21.5715
3.6	-34.0709	-20.3052
3.7	-39.0546	-19.5546
3.8	-37.8665	-20.8978
3.9	-36.2409	-20.2253
4	-35.4746	-21.709
4.1	-37.2396	-21.599
4.2	-35.5671	-20.7546
4.3	-36.5664	-21.2696
4.4	-34.3001	-20.5658
4.5	-36.2682	-20.612
4.6	-35.6425	-19.0331
4.7	-36.5011	-19.923
4.8	-35.1723	-19.6098
4.9	-33.8121	-20.2965
5	-34.0301	-20.2801
5.1	-35.4823	-20.3573
5.2	-36.1065	-20.3877
5.3	-35.59	-20.7618
5.4	-33.214	-18.6515
5.5	-32.4943	-18.8537
5.6	-35.0089	-19.837
5.7	-33.1016	-20.4766
5.8	-34.5537	-20.3037
5.9	-33.3494	-19.5369
6	-31.3482	-20.7545
6.1	-32.097	-19.0189
6.2	-33.3613	-18.2676
6.3	-34.4381	-18.6412
6.4	-31.4055	-20.6555
6.5	-33.7947	-18.8884
6.6	-31.9494	-16.7932
6.7	-31.9791	-18.9322
6.8	-33.1494	-18.0869
6.9	-30.9289	-17.507
7	-32.8178	-18.5522
7.1	-31.9097	-15.9878
7.2	-32.6109	-18.9703
7.3	-32.7965	-18.1558
7.4	-30.9663	-18.5913
7.5	-30.4486	-16.7767
7.6	-30.962	-16.6807
7.7	-31.6628	-18.4128
7.8	-31.3323	-18.5042
7.9	-30.533	-16.4393
8	-29.8118	-16.093
8.1	-30.8716	-17.7623
8.2	-30.6971	-16.4627
8.3	-29.2255	-17.1161
8.4	-28.8007	-16.0351
8.5	-29.0165	-14.6884
8.6	-28.9822	-17.4509
8.7	-29.2758	-17.354
8.8	-28.9444	-16.9288
8.9	-25.941	-14.9254
9	-29.0938	-15.9063
9.1	-29.637	-15.762
9.2	-28.5552	-17.0396
9.3	-30.317	-14.8795
9.4	-26.7818	-16.3599
9.5	-28.1527	-15.8715
9.6	-26.9767	-16.0704
9.7	-28.3474	-16.363
9.8	-27.0774	-15.343
9.9	-27.1197	-15.4634
10	-27.0525	-14.865
10.1	-27.7665	-15.8446
10.2	-27.0272	-16.3709
10.3	-26.7096	-15.8659
10.4	-25.4544	-15.1732
10.5	-26.4179	-15.6522
10.6	-25.5062	-14.053
10.7	-25.7662	-15.5631
10.8	-28.7448	-15.5417
10.9	-25.8796	-13.9889
11	-24.4985	-15.5767
11.1	-26.3361	-13.1799
11.2	-26.9548	-17.2985
11.3	-25.6046	-14.0265
11.4	-23.9105	-14.7073
11.5	-27.2943	-12.9662
11.6	-24.3186	-15.8655
11.7	-25.624	-14.3584
11.8	-23.9605	-14.9137
11.9	-24.1875	-15.2969
12	-25.7424	-13.0549
12.1	-23.8753	-13.5628
12.2	-23.0236	-15.4924
12.3	-22.4687	-15.4687
12.4	-24.9292	-12.4136
12.5	-21.9989	-14.7176
12.6	-24.0372	-14.8809
12.7	-24.6065	-13.919
12.8	-23.0038	-13.9569
12.9	-21.0728	-12.6822
13	-22.2979	-11.8291
13.1	-23.6165	-12.7259
13.2	-22.9662	-13.7474
13.3	-23.9876	-13.3157
13.4	-21.3681	-11.0556
13.5	-22.7016	-11.6235
13.6	-21.8943	-13.5037
13.7	-21.3681	-13.8837
13.8	-21.6229	-12.6385
13.9	-20.7056	-12.4868
14	-21.7881	-13.3193
14.1	-22.4642	-13.4329
14.2	-20.9057	-12.9838
14.3	-22.8626	-11.6594
14.4	-17.5536	-12.0693
14.5	-21.7914	-11.6976
14.6	-19.2008	-13.107
14.7	-21.7662	-12.0162
14.8	-20.0033	-10.7221
14.9	-16.3809	-10.959
15	-20.1957	-12.3832
15.1	-19.0727	-11.1665
15.2	-21.5277	-11.684
15.3	-22.1387	-12.1544
15.4	-18.7808	-9.56202
15.5	-20.157	-9.42258
15.6	-18.6267	-10.736
15.7	-20.5024	-11.6899
15.8	-20.331	-11.2216
15.9	-17.8625	-11.6282
16	-18.4719	-10.6751
16.1	-18.9874	-10.7999
16.2	-19.6119	-12.7838
16.3	-18.4081	-11.3925
16.4	-19.1416	-9.67281
16.5	-18.0466	-11.5466
16.6	-18.5921	-9.38899
16.7	-17.4186	-12.5905
16.8	-17.7917	-12.7448
16.9	-16.8208	-9.02391
17	-19.3809	-10.8809
17.1	-18.2064	-10.1282
17.2	-19.8285	-10.6566
17.3	-18.1847	-9.85654
17.4	-16.7906	-10.8062
17.5	-17.7869	-10.7869
17.6	-18.7674	-9.81426
17.7	-17.9507	-9.99756
17.8	-15.9306	-10.1494
17.9	-16.7853	-11.6759
18	-16.2959	-9.17089
18.1	-16.1188	-10.1969
18.2	-17.0976	-10.2382
18.3	-17.3731	-9.06056
18.4	-16.4139	-9.92949
18.5	-15.2825	-10.2669
18.6	-15.5103	-9.61965
18.7	-17.019	-9.58151
18.8	-16.2775	-9.87121
18.9	-13.9263	-9.16064
19	-16.0904	-8.54353
19.1	-15.6449	-9.80114
19.2	-15.7147	-10.496
19.3	-14.9718	-7.08113
19.4	-14.4004	-8.10351
19.5	-15.2662	-9.20373
19.6	-16.1005	-7.85054
19.7	-14.5439	-10.0752
19.8	-16.0964	-9.14327
19.9	-14.0861	-7.27357
20	-15.0286	-10.1223
20.1	-15.9864	-6.42392
20.2	-15.8658	-9.24083
20.3	-12.6512	-10.4168
20.4	-13.4363	-8.35814
20.5	-14.7835	-8.61165
20.6	-16.6774	-5.86486
20.7	-14.024	-9.55527
20.8	-12.1047	-8.60475
20.9	-11.8727	-7.73204
21	-14.4684	-7.29653
21.1	-11.4701	-8.03258
21.2	-13.9714	-9.29957
21.3	-13.2069	-8.51938
21.4	-12.1451	-8.11387
21.5	-11.6612	-7.22367
21.6	-14.0207	-8.44253
21.7	-12.7705	-7.19233
21.8	-11.5981	-8.55118
21.9	-12.4722	-7.15972
22	-13.4242	-7.45543
22.1	-12.3289	-8.01645
22.2	-12.3584	-6.76464
22.3	-12.4344	-8.52814
22.4	-10.4476	-7.24443
22.5	-10.6323	-7.3979
22.6	-11.3635	-7.53542
22.7	-12.8757	-6.7976
22.8	-12.5595	-7.95009
22.9	-10.7897	-6.53974
23	-11.8166	-8.36343
23.1	-9.63992	-6.32742
23.2	-14.0411	-8.4942
23.3	-10.9263	-7.61377
23.4	-8.52988	-6.7955
23.5	-12.0394	-7.07064
23.6	-11.283	-7.1892
23.7	-11.9637	-9.35429
23.8	-11.2847	-6.03467
23.9	-9.74595	-6.98033
24	-10.9725	-6.23815
24.1	-8.30812	-7.15187
24.2	-11.4715	-8.4715
24.3	-9.54078	-7.60328
24.4	-7.73472	-4.81285
24.5	-8.92831	-7.02206
24.6	-9.85593	-5.79343
24.7	-11.3301	-6.97069
24.8	-8.52261	-8.03823
24.9	-10.2617	-4.30855
25	-8.20351	-7.89101
25.1	-8.4575	-6.92625
25.2	-10.2268	-8.22675
25.3	-11.7457	-6.26128
25.4	-8.62357	-5.3892
25.5	-6.51676	-3.98551
25.6	-8.58146	-6.39396
25.7	-10.4896	-6.23956
25.8	-6.72542	-6.22542
25.9	-8.4453	-5.33592
26	-7.46169	-6.46169
26.1	-7.75897	-6.79022
26.2	-8.55588	-5.44651
26.3	-6.78993	-6.68056
26.4	-8.42987	-4.66424
26.5	-7.14757	-5.97569
26.6	-7.09927	-5.75552
26.7	-6.78499	-5.87874
26.8	-7.48596	-6.17346
26.9	-7.03031	-4.54594
27	-6.91805	-6.73055
27.1	-7.57104	-4.47729
27.2	-7.53616	-4.34866
27.3	-8.3759	-5.1884
27.4	-5.76215	-4.7934
27.5	-8.22616	-4.58553
27.6	-6.34604	-4.51791
27.7	-7.29367	-5.71554
27.8	-6.58467	-5.08467
27.9	-5.95343	-5.71905
28	-8.18118	-5.63431
28.1	-6.43981	-5.18981
28.2	-5.93243	-5.35431
28.3	-7.51843	-4.79968
28.4	-5.77592	-4.0103
28.5	-4.97054	-5.40804
28.6	-6.91477	-5.74289
28.7	-3.49925	-4.81175
28.8	-7.00522	-5.02084
28.9	-3.99519	-3.96394
29	-6.79727	-4.53164
29.1	-5.89584	-5.17709
29.2	-3.96278	-3.85341
29.3	-5.79497	-5.07622
29.4	-5.32989	-2.67364
29.5	-3.8488	-4.3488
29.6	-4.41421	-3.44546
29.7	-5.69797	-4.2761
29.8	-5.4501	-3.99698
29.9	-3.43622	-3.02997
30	-3.8282	-4.98445
30.1	-3.92292	-4.25105
30.2	-3.361	-2.861
30.3	-5.15806	-5.03306
30.4	-2.73599	-2.90786
30.5	-5.15728	-4.32915
30.6	-3.89067	-3.32817
30.7	-4.35805	-3.09243
30.8	-3.68442	-3.66879
30.9	-2.15101	-4.99476
31	-2.53909	-4.13284
31.1	-2.97366	-3.30178
31.2	-3.61095	-2.8297
31.3	-3.13848	-4.45098
31.4	-1.68124	-2.36874
31.5	-4.55173	-2.62985
31.6	-2.5312	-2.43745
31.7	-2.38528	-3.30715
31.8	-3.70771	-5.17646
31.9	-1.45162	-1.90474
32	-1.08576	-3.16388
32.1	-1.01638	-3.81326
32.2	-3.64973	-1.71223
32.3	-3.54831	-3.48581
32.4	-1.10274	-0.758989
32.5	-1.9224	-1.57865
32.6	-1.02291	-1.27291
32.7	-2.59178	-3.15428
32.8	-4.47274	-1.72274
32.9	-0.947063	-2.68144
33	-1.23348	-1.62411
33.1	-1.92576	-2.16013
33.2	-1.33638	-3.30513
33.3	-0.934109	-1.91848
33.4	-0.82831	-0.875185
33.5	-0.893988	-1.22211
33.6	-1.74052	-3.11552
33.7	0.163354	-0.586646
33.8	-0.35425	-2.823
33.9	1.0973	0.0191707
34	-2.34138	-0.747634
34.1	-0.904663	0.470337
34.2	-0.264417	-1.95192
34.3	-0.905021	-2.98315
34.4	1.6579	-1.18585
34.5	-0.294402	-0.810027
34.6	0.441196	-1.82443
34.7	-0.71343	-2.91656
34.8	0.569845	-1.69578
34.9	0.275395	0.244145
35	0.137597	-1.9874

## Sheet: Fig.4b
Figure 4, Panel B
Voltage (mV)	Normalized Conductance
	Baseline	ML218
-84.7	0.0234423	0.0239233
-84.6	0.0079422	0.0096725
-84.5	0.0122299	0.00874476
-84.4	-0.00299563	0.00511879
-84.3	0.00201213	0.0128033
-84.2	-0.00737942	0.00917712
-84.1	0.00670009	-0.0131352
-84	0.00647428	-0.0158873
-83.9	0.0039791	-0.0187722
-83.8	-0.000688013	-0.00693293
-83.7	-0.00866961	-0.0111054
-83.6	-0.00373259	0.00102501
-83.5	0.000903331	-0.00249736
-83.4	-0.010514	0.00538716
-83.3	-0.00224376	-0.00955818
-83.2	-0.00641494	-0.0176442
-83.1	-0.0100728	-0.00961769
-83	-0.00344147	-0.00977578
-82.9	-0.00658064	-0.0165782
-82.8	-0.0014953	0.000344934
-82.7	-0.00401066	-0.00933035
-82.6	-0.00663372	-0.00804629
-82.5	0.000556459	-0.0131676
-82.4	0.00284744	0.000162601
-82.3	-0.0147334	-0.00928275
-82.2	-0.0100415	-0.0044471
-82.1	0.0136276	0.0127411
-82	-0.00723826	-0.00433831
-81.9	0.00450883	-0.00671562
-81.8	0.000621937	-0.00830625
-81.7	-0.00810818	-0.00344039
-81.6	-0.00769558	-0.000938722
-81.5	-0.00285686	-0.0112406
-81.4	-0.00117185	-0.00649213
-81.3	-0.00581469	0.000515931
-81.2	-0.00761296	-0.0153733
-81.1	0.00348354	-0.00915341
-81	-0.00814786	-0.0163226
-80.9	-0.00539655	-0.0161992
-80.8	-0.0065612	-0.00929381
-80.7	-0.0111217	-0.00623331
-80.6	-0.00252332	0.00202946
-80.5	-0.00772419	-0.009425
-80.4	-0.00421143	-0.0241039
-80.3	-0.00143683	-0.0114224
-80.2	-0.00227926	-0.00179078
-80.1	-0.0208257	-0.0173052
-80	-0.00257842	-0.0270872
-79.9	0.000210821	-0.0144888
-79.8	-0.0118574	-0.0122023
-79.7	-0.0111033	-0.00843203
-79.6	-0.00134893	-0.00532592
-79.5	0.00359887	-0.0123114
-79.4	-0.00539401	-0.0125705
-79.3	-0.0226723	-0.0149878
-79.2	-0.00601029	-0.0116018
-79.1	-0.0110523	-0.0117228
-79	-0.00533333	-0.00210057
-78.9	-0.0068252	-0.0129109
-78.8	-0.00227743	-0.0105902
-78.7	-0.00765505	-0.0105712
-78.6	0.00122472	-0.0174795
-78.5	-0.00859307	-0.0192332
-78.4	-0.00954947	-0.0091471
-78.3	-0.0115905	0.00136872
-78.2	0.00111682	-0.0123711
-78.1	-0.00862493	-0.00169919
-78	-0.0057788	-0.00207478
-77.9	0.00707898	-0.00874295
-77.8	-0.00496765	-0.00241479
-77.7	-0.00374279	-0.00950612
-77.6	-0.0012064	-0.0107108
-77.5	-0.00706948	-0.00504982
-77.4	-0.00245442	-0.00817559
-77.3	-0.0105149	-0.00814152
-77.2	-0.00447051	-0.00728001
-77.1	-0.00487783	-0.00296851
-77	-0.0129606	0.00659786
-76.9	-0.0214964	-0.00785835
-76.8	-0.0124716	-0.0123842
-76.7	-0.00507899	-0.0108265
-76.6	-0.00394499	-0.0107894
-76.5	-0.0237364	-0.0161621
-76.4	-0.0103786	-0.00682416
-76.3	0.011832	-0.00858788
-76.2	-0.0131886	-0.0100762
-76.1	-0.0126067	-0.0171387
-76	0.000148516	-0.00915534
-75.9	-0.015979	-0.00408628
-75.8	-0.00597371	-0.0180087
-75.7	-0.0130369	-0.0207696
-75.6	-0.0060081	-0.0103745
-75.5	-0.0236436	-0.0103288
-75.4	-0.00159001	-0.0178583
-75.3	-0.0184734	-0.0199255
-75.2	-0.0124249	-0.0152484
-75.1	0.000441217	-0.00127295
-75	-0.00464812	-0.0122026
-74.9	-0.00426926	-0.0121548
-74.8	-0.0154131	-0.0176117
-74.7	-0.00440396	-0.0146008
-74.6	-0.00783351	-0.00592494
-74.5	-0.0175518	-0.000770637
-74.4	-0.0121276	-0.00807876
-74.3	-0.0155726	-0.00717171
-74.2	-0.0126107	-0.00654635
-74.1	-0.01426	-0.00520824
-74	-0.0105016	-0.00201651
-73.9	-0.0164384	-0.0210448
-73.8	-0.00691489	-3.31998e-05
-73.7	-0.00573763	-0.00439193
-73.6	-0.0190396	-0.00161291
-73.5	0.0078359	-0.00254763
-73.4	-0.0113719	-0.0205277
-73.3	-0.00361244	0.0104894
-73.2	-0.0150305	-0.00995371
-73.1	-0.00816855	-0.010181
-73	0.00143733	-0.00810711
-72.9	-0.019346	-0.00127723
-72.8	-0.00881992	-0.00163905
-72.7	-0.0059185	-0.0168621
-72.6	-0.0112344	-0.0176737
-72.5	-0.0285633	-0.0173299
-72.4	-0.0168607	-0.0159719
-72.3	0.00139275	-0.00562751
-72.2	-0.0143678	-0.0151318
-72.1	-0.000207787	-0.012169
-72	-0.0074996	-0.00527521
-71.9	-0.00779189	-0.0030226
-71.8	-0.00854483	-0.0166418
-71.7	-0.0177078	-0.0227073
-71.6	-0.0312694	-0.0105393
-71.5	-0.0111572	-0.0185104
-71.4	-0.0217346	-0.0109924
-71.3	-0.0205377	-0.0132694
-71.2	-0.0215375	-0.0158443
-71.1	-0.0226549	0.00212059
-71	-0.018208	-0.0105795
-70.9	-0.013288	-0.00639411
-70.8	-0.0170725	0.00310044
-70.7	-0.0305169	-0.00860727
-70.6	-0.00836543	-0.00293035
-70.5	-0.0118061	-0.020282
-70.4	-0.0278499	-0.0120915
-70.3	-0.00131165	-0.00166296
-70.2	-0.017493	-0.0100302
-70.1	-0.0144049	-0.0046201
-70	-0.0156429	-0.0137509
-69.9	-0.0184069	-0.00298119
-69.8	-0.0212935	-0.0101952
-69.7	-0.0204279	-0.00565525
-69.6	-0.0135658	-0.0395844
-69.5	-0.000219176	-0.000726049
-69.4	-0.0205294	-0.0209725
-69.3	-0.00692762	-0.0102894
-69.2	-0.0140677	-0.00916974
-69.1	-0.016497	-0.0173451
-69	-0.0198769	0.00073323
-68.9	-0.0186478	-0.0128595
-68.8	-0.0143362	-0.00526824
-68.7	-0.0142851	-0.0145295
-68.6	-0.0245606	-0.00933596
-68.5	-0.0148955	-0.0198297
-68.4	-0.00318948	-0.0196174
-68.3	-0.0247942	-0.00200731
-68.2	-0.0220125	-0.013588
-68.1	-0.0181517	-0.0185232
-68	-0.0206117	-0.0204338
-67.9	-0.0171006	-0.00198704
-67.8	-0.0176503	-0.0133151
-67.7	-0.014369	-0.01812
-67.6	-0.0231887	-0.0105865
-67.5	-0.0272262	-0.017994
-67.4	-0.0106122	-0.0240429
-67.3	-0.00394457	-0.00777196
-67.2	-0.027593	-0.00233774
-67.1	-0.0147851	-0.00762329
-67	-0.0213674	-0.0185997
-66.9	-0.0160123	-0.0168475
-66.8	-0.0137883	-0.000939542
-66.7	-0.0201479	-0.0100979
-66.6	-0.0228881	-0.0234398
-66.5	-0.015332	-0.027088
-66.4	-0.0118857	-0.005867
-66.3	-0.011226	-0.0178576
-66.2	-0.0104435	-0.0018442
-66.1	-0.0175693	-0.0281218
-66	-0.0232479	-0.00835904
-65.9	-0.023817	-0.00890848
-65.8	-0.0237772	-0.016149
-65.7	-0.0131078	-0.0114136
-65.6	-0.0172158	-0.014464
-65.5	-0.00749801	-0.0036285
-65.4	-0.0139376	-0.00667754
-65.3	-0.0185503	-0.0103597
-65.2	-0.0134714	-0.0127974
-65.1	-0.0117014	-0.0232387
-65	-0.0237098	-0.00450292
-64.9	-0.00248513	-2.75591e-05
-64.8	0.00669891	-0.00608512
-64.7	-0.0171774	-0.0194036
-64.6	-0.00836082	-0.0135115
-64.5	-0.00323689	0.00502575
-64.4	-0.0171692	0.00921998
-64.3	-0.0212156	-0.0163301
-64.2	-0.018323	-0.00375392
-64.1	-0.00350262	-0.0163712
-64	-0.0191099	-0.0223479
-63.9	-0.016705	-0.00353526
-63.8	-0.0184063	-0.0185851
-63.7	-0.00439899	-0.00769357
-63.6	-0.026689	-0.0130514
-63.5	-0.00903809	0.00234378
-63.4	-0.016494	0.00226178
-63.3	-0.00618458	-0.00406518
-63.2	-0.000993407	-0.0235518
-63.1	-0.0182527	-0.00777766
-63	-0.0248714	0.0173521
-62.9	-0.016541	-0.00620093
-62.8	-0.000641303	-0.0109668
-62.7	-0.0028533	-0.0154218
-62.6	-0.0276485	-0.0203721
-62.5	0.00268279	-0.0125665
-62.4	-0.0269624	-0.0138044
-62.3	-0.0106127	0.00569053
-62.2	-0.00600879	-0.00996497
-62.1	-0.0116662	-0.00454791
-62	-7.33786e-05	-0.0122874
-61.9	0.000234738	-0.014837
-61.8	-0.015611	-0.013971
-61.7	-0.0118815	-0.0168561
-61.6	-0.0149002	-0.000146298
-61.5	-0.0165222	0.0149673
-61.4	-0.0117612	-0.00672559
-61.3	-0.0257876	0.00251343
-61.2	-0.00809848	-0.00546012
-61.1	-0.00831225	-0.00293615
-61	-0.000958475	0.00864237
-60.9	-0.025308	0.0141533
-60.8	-0.00535949	0.00466876
-60.7	-0.00106894	-0.00698574
-60.6	-0.00449924	-0.00924561
-60.5	-0.0164489	0.00570266
-60.4	-0.0142234	0.0127319
-60.3	-0.0232375	0.00749928
-60.2	-0.00665456	-0.00289637
-60.1	0.00452378	-0.00649856
-60	-0.0082606	-0.00428171
-59.9	-0.0048486	0.000774299
-59.8	-0.0191008	-0.016026
-59.7	-0.0180354	-0.0106389
-59.6	-0.0107179	0.00346224
-59.5	0.00248082	5.2418e-06
-59.4	-0.00778163	-0.00463508
-59.3	-0.0112737	0.00398089
-59.2	-0.0117658	-0.00302143
-59.1	-0.0191983	-0.017618
-59	-0.00711921	-0.0116853
-58.9	-0.0115461	-0.00725768
-58.8	-0.0155891	-0.00772042
-58.7	0.00073956	0.000105655
-58.6	-0.010803	0.0043929
-58.5	-0.0132786	0.00343204
-58.4	-0.0137813	-0.00789114
-58.3	-0.0178514	0.00660226
-58.2	-0.0154526	0.00189317
-58.1	0.00614227	-0.0031692
-58	-0.0173984	0.0136009
-57.9	-0.00769728	0.0051215
-57.8	0.00308696	-0.00115546
-57.7	-0.0166812	-0.0180699
-57.6	-0.00415402	0.00785344
-57.5	-0.00971911	0.00138256
-57.4	-0.0108956	0.00160096
-57.3	0.00127738	-0.0097161
-57.2	-0.0170007	0.00824326
-57.1	-0.00132925	0.000356765
-57	-0.0082644	0.00541121
-56.9	-0.00408368	0.00892039
-56.8	-0.0181545	-0.0239461
-56.7	-0.00161023	0.000697471
-56.6	-0.0132885	0.00890173
-56.5	-0.00303465	0.0355612
-56.4	-0.00408721	0.0173604
-56.3	-0.00149717	0.0050409
-56.2	-0.00660648	0.00909981
-56.1	-0.00672093	0.00722512
-56	-0.0037203	0.00201947
-55.9	0.0106789	0.0222109
-55.8	-0.00964873	0.0175362
-55.7	-0.012216	0.00564517
-55.6	-0.017239	0.0121949
-55.5	-0.000612352	0.00255508
-55.4	0.0100501	0.0110564
-55.3	-0.0210462	0.0133979
-55.2	-0.0195425	0.0130923
-55.1	-0.0192676	-0.000317043
-55	-0.0131013	0.0279007
-54.9	-0.00513836	0.0173147
-54.8	-0.00168938	0.0154102
-54.7	0.00039217	0.00709287
-54.6	0.00357901	0.0242371
-54.5	-0.0231278	0.0228674
-54.4	0.000316674	0.0236376
-54.3	-0.00670695	0.0244092
-54.2	-0.00683401	0.0142546
-54.1	-0.00267081	0.0247007
-54	-0.00570473	0.0157758
-53.9	-0.00597134	0.0140207
-53.8	0.0147347	0.0264866
-53.7	0.00892764	0.0236577
-53.6	-0.00608176	0.0229873
-53.5	-0.0307435	0.0181563
-53.4	0.00984241	0.0393804
-53.3	0.0132212	0.0180615
-53.2	-0.00437225	0.00340136
-53.1	-0.0133254	0.0137833
-53	0.00475666	0.0227363
-52.9	-0.0127691	0.0484779
-52.8	-0.00658902	0.0129755
-52.7	-0.0106646	0.0153834
-52.6	0.0196154	0.0273112
-52.5	-0.00939822	0.0117892
-52.4	0.0202473	0.0110847
-52.3	-0.00190895	0.023604
-52.2	-0.00883526	0.023648
-52.1	0.0049053	0.0314277
-52	0.0107349	0.0325878
-51.9	0.00379772	0.0247008
-51.8	-0.00272976	0.0397241
-51.7	0.00937296	0.030528
-51.6	0.00141075	0.0298366
-51.5	0.00313101	0.0384271
-51.4	0.00756891	0.0416481
-51.3	-0.00500131	0.0389192
-51.2	0.00716834	0.0359959
-51.1	0.00990539	0.0457596
-51	0.00116695	0.0297499
-50.9	0.00433364	0.0230564
-50.8	0.0175778	0.0266546
-50.7	0.00694365	0.0458429
-50.6	0.0156072	0.0284277
-50.5	0.0118746	0.0476701
-50.4	0.0325618	0.0398217
-50.3	0.0188539	0.0472403
-50.2	0.0204719	0.0389908
-50.1	0.0318132	0.0379104
-50	0.0193611	0.0455453
-49.9	0.0174944	0.0505436
-49.8	0.0346959	0.0414909
-49.7	0.0197231	0.0470676
-49.6	0.034633	0.044464
-49.5	0.0107097	0.0685724
-49.4	0.0121845	0.0663729
-49.3	0.0113189	0.0645497
-49.2	0.0365558	0.0677041
-49.1	0.0318994	0.0557049
-49	0.0129711	0.0523204
-48.9	0.0151921	0.066825
-48.8	0.0361346	0.0563148
-48.7	0.038979	0.0741461
-48.6	0.0371027	0.0831366
-48.5	0.0396589	0.0780233
-48.4	0.0469602	0.0742519
-48.3	0.0307032	0.0867735
-48.2	0.0258373	0.074451
-48.1	0.0503903	0.0683218
-48	0.0581864	0.094727
-47.9	0.0503556	0.0983687
-47.8	0.0316142	0.0644887
-47.7	0.045988	0.0808214
-47.6	0.035869	0.0889669
-47.5	0.0550752	0.0936018
-47.4	0.0477908	0.100019
-47.3	0.0598535	0.113739
-47.2	0.0717958	0.103445
-47.1	0.0723302	0.0935152
-47	0.0478527	0.0985846
-46.9	0.0768725	0.11654
-46.8	0.0775659	0.132365
-46.7	0.064195	0.106929
-46.6	0.0695686	0.120598
-46.5	0.0728328	0.132913
-46.4	0.0706397	0.112553
-46.3	0.08425	0.12609
-46.2	0.066389	0.134466
-46.1	0.0838379	0.143467
-46	0.0819526	0.136645
-45.9	0.0779235	0.152908
-45.8	0.0677655	0.155134
-45.7	0.106441	0.148098
-45.6	0.0924596	0.155974
-45.5	0.0836632	0.159427
-45.4	0.0977532	0.154592
-45.3	0.100025	0.167986
-45.2	0.103999	0.187916
-45.1	0.110298	0.161145
-45	0.110122	0.199651
-44.9	0.100198	0.161604
-44.8	0.0984596	0.190016
-44.7	0.114712	0.183336
-44.6	0.114697	0.182371
-44.5	0.0972626	0.211146
-44.4	0.124323	0.201387
-44.3	0.110754	0.229661
-44.2	0.125099	0.207537
-44.1	0.12072	0.210317
-44	0.130575	0.236666
-43.9	0.125566	0.219214
-43.8	0.133256	0.216427
-43.7	0.149924	0.254117
-43.6	0.141459	0.224761
-43.5	0.152352	0.221555
-43.4	0.16564	0.22981
-43.3	0.151319	0.222842
-43.2	0.170019	0.259784
-43.1	0.181483	0.268765
-43	0.183302	0.271688
-42.9	0.174011	0.27273
-42.8	0.195544	0.278405
-42.7	0.158381	0.28726
-42.6	0.201793	0.29551
-42.5	0.185135	0.295962
-42.4	0.197047	0.282862
-42.3	0.191063	0.302598
-42.2	0.203496	0.313261
-42.1	0.214358	0.325021
-42	0.208535	0.310822
-41.9	0.219273	0.32347
-41.8	0.234228	0.334875
-41.7	0.2176	0.328334
-41.6	0.23114	0.359725
-41.5	0.238084	0.373176
-41.4	0.252337	0.359352
-41.3	0.258518	0.361212
-41.2	0.273487	0.374946
-41.1	0.259383	0.395424
-41	0.26446	0.360771
-40.9	0.264658	0.355493
-40.8	0.288375	0.401011
-40.7	0.276669	0.402306
-40.6	0.295064	0.402736
-40.5	0.292683	0.414512
-40.4	0.301791	0.407971
-40.3	0.297113	0.419358
-40.2	0.292258	0.416971
-40.1	0.309978	0.426434
-40	0.326591	0.452422
-39.9	0.308533	0.436642
-39.8	0.340091	0.441332
-39.7	0.312554	0.495317
-39.6	0.347027	0.450758
-39.5	0.317597	0.473454
-39.4	0.33586	0.490006
-39.3	0.357176	0.505278
-39.2	0.362693	0.486516
-39.1	0.376585	0.488223
-39	0.363231	0.506923
-38.9	0.411358	0.518969
-38.8	0.37435	0.50908
-38.7	0.409853	0.505449
-38.6	0.392941	0.524304
-38.5	0.403456	0.522492
-38.4	0.416196	0.542117
-38.3	0.429818	0.546434
-38.2	0.417751	0.55824
-38.1	0.446839	0.564189
-38	0.446306	0.552436
-37.9	0.442203	0.571143
-37.8	0.446941	0.573499
-37.7	0.452545	0.594589
-37.6	0.449119	0.581441
-37.5	0.468762	0.594141
-37.4	0.485893	0.623407
-37.3	0.503588	0.604959
-37.2	0.50846	0.614543
-37.1	0.486185	0.623007
-37	0.501894	0.619949
-36.9	0.499546	0.627759
-36.8	0.504962	0.631657
-36.7	0.505554	0.668775
-36.6	0.52658	0.649033
-36.5	0.517324	0.662544
-36.4	0.541555	0.668868
-36.3	0.552815	0.646224
-36.2	0.538162	0.657463
-36.1	0.534629	0.673903
-36	0.553791	0.696276
-35.9	0.565139	0.66388
-35.8	0.582827	0.695512
-35.7	0.559523	0.66844
-35.6	0.574446	0.679134
-35.5	0.584137	0.67446
-35.4	0.579587	0.689717
-35.3	0.626191	0.700034
-35.2	0.60155	0.71158
-35.1	0.591701	0.727941
-35	0.619925	0.685306
-34.9	0.633681	0.691384
-34.8	0.632194	0.68189
-34.7	0.637824	0.713944
-34.6	0.641155	0.728537
-34.5	0.634143	0.735225
-34.4	0.644812	0.72889
-34.3	0.648351	0.753275
-34.2	0.656565	0.753016
-34.1	0.646129	0.766847
-34	0.652029	0.762235
-33.9	0.658129	0.765898
-33.8	0.686255	0.743446
-33.7	0.665872	0.776693
-33.6	0.655199	0.781143
-33.5	0.686352	0.784384
-33.4	0.687657	0.780752
-33.3	0.699328	0.754195
-33.2	0.696475	0.790734
-33.1	0.714213	0.78364
-33	0.709004	0.769585
-32.9	0.713471	0.782285
-32.8	0.714475	0.815421
-32.7	0.70668	0.771964
-32.6	0.704925	0.796723
-32.5	0.740509	0.794326
-32.4	0.737146	0.803694
-32.3	0.746875	0.800302
-32.2	0.762549	0.79112
-32.1	0.729967	0.83076
-32	0.743999	0.818578
-31.9	0.758633	0.808628
-31.8	0.757695	0.830043
-31.7	0.76793	0.832006
-31.6	0.766822	0.839571
-31.5	0.769074	0.849459
-31.4	0.754498	0.835661
-31.3	0.781289	0.833572
-31.2	0.765377	0.818931
-31.1	0.761259	0.816808
-31	0.799487	0.849891
-30.9	0.804464	0.841902
-30.8	0.790953	0.848848
-30.7	0.779103	0.867713
-30.6	0.81022	0.859463
-30.5	0.791347	0.854816
-30.4	0.802063	0.873029
-30.3	0.801775	0.865011
-30.2	0.814261	0.870795
-30.1	0.824115	0.871636
-30	0.819087	0.870127
-29.9	0.81462	0.869403
-29.8	0.853689	0.888661
-29.7	0.843311	0.872697
-29.6	0.826551	0.892042
-29.5	0.847714	0.897978
-29.4	0.849833	0.905796
-29.3	0.848867	0.932495
-29.2	0.824658	0.896529
-29.1	0.851589	0.934513
-29	0.853738	0.903492
-28.9	0.832152	0.886532
-28.8	0.844808	0.920441
-28.7	0.846183	0.912855
-28.6	0.843849	0.902283
-28.5	0.859531	0.919446
-28.4	0.860552	0.889129
-28.3	0.861971	0.935848
-28.2	0.855327	0.9182
-28.1	0.856946	0.913259
-28	0.870421	0.935806
-27.9	0.856645	0.937164
-27.8	0.888992	0.915838
-27.7	0.864689	0.919908
-27.6	0.873903	0.938271
-27.5	0.861446	0.924532
-27.4	0.886647	0.936923
-27.3	0.874176	0.937217
-27.2	0.891282	0.941944
-27.1	0.881789	0.923957
-27	0.887125	0.936463
-26.9	0.902939	0.923689
-26.8	0.922636	0.954665
-26.7	0.890545	0.928467
-26.6	0.911303	0.96827
-26.5	0.891238	0.926002
-26.4	0.902542	0.969346
-26.3	0.927699	0.944388
-26.2	0.938905	0.934581
-26.1	0.924877	0.960961
-26	0.889572	0.9625
-25.9	0.9108	0.922276
-25.8	0.911002	0.962191
-25.7	0.929677	0.949201
-25.6	0.911213	0.943882
-25.5	0.913279	0.951439
-25.4	0.965064	1.00296
-25.3	0.929219	0.951123
-25.2	0.93175	0.976633
-25.1	0.913147	0.972204
-25	0.948062	0.937066
-24.9	0.920692	0.980713
-24.8	0.940534	0.965227
-24.7	0.927257	0.954343
-24.6	0.922093	0.965318
-24.5	0.915029	0.959079
-24.4	0.967957	0.95663
-24.3	0.963687	0.968282
-24.2	0.929294	0.990593
-24.1	0.952791	0.942458
-24	0.910869	0.952098
-23.9	0.957073	0.987279
-23.8	0.941312	0.982213
-23.7	0.956725	0.969686
-23.6	0.960705	0.949351
-23.5	0.937416	0.974983
-23.4	0.958466	1.01602
-23.3	0.959699	0.994162
-23.2	0.954081	0.998102
-23.1	0.939645	1.03585
-23	0.943872	0.951026
-22.9	0.983021	1.01157
-22.8	0.962742	1.00437
-22.7	0.968989	0.979488
-22.6	0.962699	0.989272
-22.5	0.94402	0.985349
-22.4	0.974843	0.971915
-22.3	0.989229	1.00694
-22.2	0.977707	0.976888
-22.1	0.973798	0.972305
-22	0.946666	0.964614
-21.9	1.01552	1.01793
-21.8	0.970795	1.02243
-21.7	0.965977	1.01793
-21.6	0.992025	0.989703
-21.5	0.971105	1.00169
-21.4	0.978227	1.00652
-21.3	0.966749	1.02395
-21.2	0.991893	0.992353
-21.1	0.988419	1.00447
-21	0.974008	1.01033
-20.9	0.99373	0.998151
-20.8	0.984879	1.03422
-20.7	1.00067	1.00708
-20.6	0.988881	0.985563
-20.5	0.961074	0.968433
-20.4	0.984809	1.02403
-20.3	0.968872	1.03521
-20.2	0.990681	0.998757
-20.1	1.00691	1.01995
-20	0.987524	0.975534
-19.9	0.994479	1.0023
-19.8	0.976148	1.03636
-19.7	0.976488	1.00635
-19.6	0.993088	1.01019
-19.5	0.993469	0.966558
-19.4	1.03039	1.03174
-19.3	0.991485	1.02549
-19.2	0.956353	0.993141
-19.1	1.01492	0.997689
-19	0.985035	0.981375
-18.9	1.04505	1.03478
-18.8	0.993033	0.992172
-18.7	0.996945	0.990437
-18.6	1.00484	1.03088
-18.5	0.986354	1.0034
-18.4	1.01207	1.04376
-18.3	0.986024	0.987854
-18.2	1.00244	1.00404
-18.1	1.02553	1.01013
-18	0.964424	0.970058
-17.9	1.02585	1.03572
-17.8	1.01074	1.0143
-17.7	1.00079	1.0253
-17.6	1.02031	1.00479
-17.5	1.02441	1.00586
-17.4	1.02806	1.03004
-17.3	1.0109	1.03257
-17.2	0.991041	1.00669
-17.1	0.979275	1.00884
-17	1.02044	0.989749
-16.9	1.02752	1.04532
-16.8	1.04018	0.997518
-16.7	1.03231	1.01338
-16.6	1.01665	1.02862
-16.5	0.985844	1.01113
-16.4	1.04461	1.02893
-16.3	1.03938	1.01101
-16.2	1.01922	1.02287
-16.1	1.01246	1.06297
-16	1.02509	0.979593
-15.9	1.05033	0.993276
-15.8	1.03497	1.01171
-15.7	1.01288	1.01547
-15.6	1.01572	0.986022
-15.5	1.00294	0.956063
-15.4	1.06398	1.02074
-15.3	1.02234	1.05153
-15.2	1.04572	1.00181
-15.1	1.03166	1.01919
-15	1.00676	0.965453
-14.9	1.03077	1.03915
-14.8	1.04229	1.02246
-14.7	1.02005	1.00606
-14.6	1.00859	0.997372
-14.5	1.00849	0.997569
-14.4	1.03049	1.01642
-14.3	1.01059	1.03913
-14.2	1.03295	1.03196
-14.1	1.0641	1.02551
-14	1.0293	0.99602
-13.9	1.03902	1.02613
-13.8	1.03747	1.00104
-13.7	1.00886	1.07165
-13.6	1.03669	1.00424
-13.5	1.00821	0.978135
-13.4	1.03254	1.04661
-13.3	1.02318	1.05817
-13.2	1.02655	1.00117
-13.1	1.03542	1.05986
-13	0.982844	0.968426
-12.9	1.03756	1.05615
-12.8	1.046	1.00164
-12.7	1.01629	0.977324
-12.6	1.05138	1.04309
-12.5	0.979769	1.03805
-12.4	1.04093	1.02904
-12.3	1.0285	0.999799
-12.2	1.00111	1.01325
-12.1	1.04298	1.03116
-12	0.978332	1.03243
-11.9	1.05305	1.08653
-11.8	1.04564	0.97317
-11.7	1.02069	1.00247
-11.6	1.04259	1.04568
-11.5	0.990756	1.02638
-11.4	1.04115	1.07237
-11.3	1.0255	1.02167
-11.2	1.00297	0.991524
-11.1	1.03819	1.06242
-11	1.00137	0.983313
-10.9	1.05842	1.06741
-10.8	1.01407	1.01927
-10.7	1.02817	0.989934
-10.6	0.968932	0.958758
-10.5	1.04996	1.01294
-10.4	1.05178	1.05365
-10.3	1.02943	1.06019
-10.2	1.02426	1.01666
-10.1	1.00985	0.988918
-10	1.00266	1.03813
-9.9	1.02601	1.00605
-9.8	1.06043	1.01342
-9.7	1.01443	1.00502
-9.6	1.0055	1.00301
-9.5	1.01465	0.994103
-9.4	1.04173	1.00803
-9.3	1.01034	1.01945
-9.2	1.01017	0.981859
-9.1	1.016	0.939236
-9	1.03906	1.02228
-8.9	1.00651	1.0576
-8.8	1.01585	1.01527
-8.7	1.05581	1.03447
-8.6	1.00429	0.981174
-8.5	1.0108	0.979967
-8.4	1.06093	1.05944
-8.3	1.00789	0.975757
-8.2	1.01359	0.971844
-8.1	0.988583	0.964311
-8	1.01686	0.905245
-7.9	1.04176	1.01527
-7.8	1.04289	1.02737
-7.7	1.01181	0.991207
-7.6	1.01229	0.963502
-7.5	0.981288	1.04812
-7.4	1.01952	1.04578
-7.3	1.03108	0.995802
-7.2	0.982844	0.954772
-7.1	0.952675	0.944188
-7	1.00476	1.0148
-6.9	0.999832	1.07512
-6.8	1.00546	0.983978
-6.7	1.06172	1.01914
-6.6	0.96182	0.982581
-6.5	0.980193	0.963829
-6.4	1.04537	1.00312
-6.3	1.02243	0.984316
-6.2	0.986795	0.998516
-6.1	0.963901	1.02101
-6	1.00042	1.00016
-5.9	1.05135	1.04369
-5.8	1.0235	0.981878
-5.7	1.02223	0.977779
-5.6	0.979829	0.943251
-5.5	1.00563	1.02758
-5.4	1.05255	1.02905
-5.3	1.03221	0.997822
-5.2	1.00483	1.00866
-5.1	0.974472	0.899738
-5	0.979724	0.998507
-4.9	1.02975	1.00244
-4.8	1.00655	0.982168
-4.7	1.03139	1.01699
-4.6	0.998159	0.975778
-4.5	0.964753	0.998589
-4.4	1.02024	1.02158
-4.3	1.00381	1.03548
-4.2	0.992468	0.95141
-4.1	0.975555	0.953765
-4	0.999182	1.04457
-3.9	1.03565	1.04
-3.8	0.992909	0.965158
-3.7	0.989588	1.01392
-3.6	0.984936	0.965351
-3.5	0.962801	0.942921
-3.4	1.01851	1.01826
-3.3	0.969189	1.00869
-3.2	1.00762	0.98082
-3.1	0.988316	0.953269
-3	0.991617	0.976328
-2.9	1.03346	0.977861
-2.8	0.956968	1.07423
-2.7	0.977394	0.962921
-2.6	0.957068	0.972671
-2.5	0.964404	1.00291
-2.4	1.02579	0.990204
-2.3	1.00067	0.940703
-2.2	0.975404	0.973984
-2.1	0.953427	0.966061
-2	1.02064	0.981716
-1.9	0.990402	1.0235
-1.8	0.98176	1.00889
-1.7	0.958172	0.966799
-1.6	0.954603	0.96156
-1.5	1.00119	1.00168
-1.4	1.04177	0.976928
-1.3	0.982339	0.927056
-1.2	1.0013	1.05309
-1.1	0.996409	0.89793
-1	0.977699	1.00967
-0.9	0.962426	1.01155
-0.8	0.964848	1.01523
-0.7	0.96693	0.95771
-0.6	0.969026	0.8973
-0.5	0.964677	0.952717
-0.4	0.981178	0.985131
-0.3	0.981174	0.979111
-0.2	0.991672	0.945692
-0.1	0.946312	0.963865
0	0.93346	0.953998
0.1	0.984465	0.971146
0.2	0.946004	0.923488
0.3	1.01647	0.960546
0.4	0.988938	0.958611
0.5	0.996736	1.0476
0.6	0.948202	0.932012
0.7	1.02141	0.961574
0.8	1.00326	0.978695
0.9	0.914989	0.888008
1	0.956485	0.928698
1.1	0.985433	1.0291
1.2	1.00474	1.0365
1.3	1.01052	0.977579
1.4	0.921645	0.956686
1.5	0.949708	0.981601
1.6	0.991726	0.972416
1.7	0.974892	1.07065
1.8	0.944856	0.97979
1.9	0.991901	0.974487
2	0.978396	0.97856
2.1	0.994746	0.999592
2.2	1.00067	1.00179
2.3	0.966712	0.961644
2.4	0.925075	0.927963
2.5	0.959587	0.960213
2.6	0.957571	0.979608
2.7	0.979332	1.01942
2.8	1.00362	1.03582
2.9	0.968209	0.927684
3	0.968599	0.980597
3.1	0.969393	1.01982
3.2	0.990753	1.05803
3.3	0.962101	0.959254
3.4	0.979522	0.931021
3.5	0.971406	1.00353
3.6	0.890918	0.949653
3.7	1.0247	0.919446
3.8	0.996914	0.98789
3.9	0.957376	0.961276
4	0.940348	1.03741
4.1	0.99053	1.03781
4.2	0.949309	1.00272
4.3	0.979363	1.03329
4.4	0.921858	1.00466
4.5	0.978153	1.01255
4.6	0.964643	0.940249
4.7	0.991352	0.98978
4.8	0.958628	0.979762
4.9	0.924818	1.01988
5	0.934084	1.02492

## Sheet: Fig.4c
Figure 4, Panel C
Voltage (mV)	Current (pA)
	Baseline	ISR	ISR+ML218
-84.7	17.8906	18.5625	18.5312
-84.6	21.5469	22.7969	20.5781
-84.5	22.0938	19.9062	22.5781
-84.4	22.875	22.7656	20.9219
-84.3	24.6406	22.8438	22.3438
-84.2	22.0781	20.3125	20.6875
-84.1	23.1875	20.9531	21.0625
-84	22.4844	21.9688	22.9062
-83.9	20.75	20.9219	20
-83.8	21.6719	21.9844	22.7188
-83.7	24.1562	21.8906	22.9219
-83.6	22.375	20.7969	20.9375
-83.5	24.0312	22.7812	22.3906
-83.4	23.8281	21.25	21.9844
-83.3	22.4844	22.7969	21.6875
-83.2	23.2344	22.0469	21.8281
-83.1	23.9375	22.9375	23.2656
-83	21.7812	22.2031	20.5938
-82.9	24.125	22.9844	22
-82.8	21.2656	22.9844	22.25
-82.7	21.5469	22.9219	22.9062
-82.6	23.9375	19.8281	20.3281
-82.5	23.1094	23.7344	23.3594
-82.4	21.3125	21.4375	22.0156
-82.3	22.1719	23.0781	22.2812
-82.2	23.7031	21.0312	22.5156
-82.1	24.8125	23.8281	21.6562
-82	21.75	21.9219	21.7344
-81.9	21.6094	21	22.8281
-81.8	22.6562	22.9844	22
-81.7	24.6094	23	21.7031
-81.6	23.1094	22.4531	22.5625
-81.5	22.5469	22.9844	23.5469
-81.4	24.1562	22.9688	22.0156
-81.3	22.8281	22.5	22.8594
-81.2	22.2812	23.2969	22.4531
-81.1	24.6562	24.5469	21.8281
-81	21.6875	22.6719	23.4844
-80.9	24.0312	21.25	24.3594
-80.8	23.7031	24	21.1406
-80.7	23.2031	21.1094	22.2969
-80.6	25.0938	23.9688	21.8906
-80.5	24.2656	22.7344	23.2031
-80.4	24.0312	24.3125	23.7812
-80.3	23.8281	21.7969	22.1719
-80.2	23.8438	22.8438	23.6562
-80.1	23.6875	24.5	21.9844
-80	24.875	23.2188	25.0156
-79.9	23.7656	24.2969	21.3281
-79.8	23.9688	24.7031	24.7031
-79.7	23.9375	20.9688	22.8125
-79.6	23.1562	24	22.7188
-79.5	22.6406	22.2969	23.9844
-79.4	24.4531	24.3438	23.7969
-79.3	24.3594	24.8906	23.6875
-79.2	22.2344	22.9062	22.6562
-79.1	23.4375	22.7344	22.9688
-79	24.9062	24.6562	24.1875
-78.9	23.5938	22.2656	24.3125
-78.8	25.2031	24.1875	24.7656
-78.7	22	22.9375	24.3906
-78.6	23.6562	25.8906	22.375
-78.5	25.6094	25.0469	24.6875
-78.4	26.2031	22.75	23.0312
-78.3	23.0938	22.9844	23.2969
-78.2	23.7812	23.9219	24.5
-78.1	26.4219	23.4219	22.9375
-78	23.5469	24.1562	23.4375
-77.9	22.2031	25.7188	23.4062
-77.8	23.9375	23.1406	24.625
-77.7	23.7031	23.7969	23.4531
-77.6	24.7031	23.7031	24.2031
-77.5	23.4844	23.875	23.7344
-77.4	23.875	24.3125	22.5625
-77.3	25.9844	23.2188	24.0469
-77.2	23.8594	22.25	25.6719
-77.1	22.0469	24.8281	24.3125
-77	26.25	24.1875	22.5781
-76.9	25.0156	25.2812	24.2031
-76.8	25.1875	25.0781	23.6875
-76.7	25.6094	22.5625	21.7031
-76.6	24.3281	26.8438	24.9219
-76.5	25.8594	22.8594	23.5
-76.4	24	23.2031	23.8438
-76.3	24.75	23.0469	24.7031
-76.2	25.2812	24.3281	24.4531
-76.1	26.7969	23.1406	24.1562
-76	25.875	25.2344	23.9688
-75.9	25.3125	22.9844	22.125
-75.8	24.0312	24.4688	25.9219
-75.7	23.3125	25.3906	24.7812
-75.6	25.2188	24.6719	24.0156
-75.5	24.25	25.25	23.4219
-75.4	25.375	23.8438	23.2344
-75.3	25.3438	23.9375	24.3906
-75.2	24.7969	25.5469	23.0625
-75.1	24.125	24.75	26.3906
-75	26.7188	25.6875	24.3281
-74.9	25.9375	21.9375	25.2969
-74.8	24.6719	24.875	23.2656
-74.7	23.9219	26.0469	24.2344
-74.6	27.0625	22.2812	23.3906
-74.5	23.4062	23.5469	25.1562
-74.4	24.6562	25.7812	24.3125
-74.3	24.7969	26.6875	25.7031
-74.2	24.9219	24.375	23.9844
-74.1	26.3438	25.2031	24.5625
-74	26.2812	25.0938	21.8906
-73.9	27.5938	24.5625	25.2812
-73.8	24	23.9219	23.4844
-73.7	26.5156	25.7344	24.9219
-73.6	25.3125	25.9062	24.1094
-73.5	25.8438	23.6562	24.7969
-73.4	25.1562	23.5625	23.2969
-73.3	25.1094	27.25	23.9531
-73.2	25.3281	24.8906	24.9219
-73.1	24.9531	23.5781	25.3125
-73	26.4844	24.8281	25.5781
-72.9	26.2344	27.1562	24.1875
-72.8	26.8438	24.6562	27.3438
-72.7	26.2656	24.4375	24.5469
-72.6	24.9844	24.375	22.4062
-72.5	27.4531	24.7969	26.0156
-72.4	24.3594	24.6094	23.75
-72.3	26.1719	24.8594	25.0312
-72.2	26.9531	26.9531	26.2969
-72.1	26.4375	25.6719	26.5781
-72	25.3438	26.8438	21.6094
-71.9	24.75	26.4219	25.1094
-71.8	26.2031	24.6406	28
-71.7	27.1406	24.7969	25.25
-71.6	25.5156	25.5469	26.1094
-71.5	25.4688	25.4531	24.9219
-71.4	27.8125	26.5156	26.0781
-71.3	26.9531	24.0781	25.2344
-71.2	25.2812	24.4844	23.4375
-71.1	27.1406	26.6562	25.6094
-71	27.0156	24.7031	24.0781
-70.9	25.1562	25.5312	24.625
-70.8	26.5	25.0156	26.3438
-70.7	27.2344	28.3594	25.5312
-70.6	25.8438	25.3594	26.0156
-70.5	25.8594	25.6562	25.9844
-70.4	25.2969	26.7031	25.1406
-70.3	26.3438	26.75	23.4062
-70.2	26.0312	24.8906	24.5312
-70.1	25.3438	26.4062	26.3125
-70	27.2812	27.6562	24.8125
-69.9	26.0781	25.2656	25.5156
-69.8	26.7656	24.4219	24.6562
-69.7	25.5938	24.7031	25.1719
-69.6	26.7188	26.2656	26.75
-69.5	27.5	26.75	25.5938
-69.4	26.9844	25.9844	25.2812
-69.3	27.5312	26.1719	25.3125
-69.2	26.5	25.9062	25.3438
-69.1	25.4219	26.7969	26.4219
-69	27.5469	25.2188	25.6719
-68.9	27.0625	26.4531	26.7656
-68.8	26.0156	26.0781	25.1094
-68.7	26.8438	25.2344	25.9531
-68.6	26.0156	27	27.0781
-68.5	27.25	28.4062	25.4062
-68.4	26.5	25.7969	24.6094
-68.3	27.1094	26.3594	25.9688
-68.2	26.9844	25.3281	26.1875
-68.1	29.9219	24.6406	26.5156
-68	28.875	25.5625	28.7344
-67.9	24.7344	26.8594	24.5
-67.8	26.0312	26.875	24.2812
-67.7	26.3281	24.8594	24.9062
-67.6	28.4375	26.0469	26.7812
-67.5	27.0469	28.0469	26.6406
-67.4	26.7344	27.5938	26.625
-67.3	27.8125	25.9531	26.1875
-67.2	24.9375	27.3438	27.2969
-67.1	28.2031	26.4219	26.4062
-67	28.7344	26.4062	26.0625
-66.9	27.0469	26.9062	25.625
-66.8	28.7344	26.9375	26.6875
-66.7	27.3125	24.5469	24.5625
-66.6	27.1875	28.3281	27.0781
-66.5	26.7344	26.4531	26.25
-66.4	27.0938	27.5156	26.7969
-66.3	27.5	24.7344	26.6094
-66.2	26.7656	26.8281	27.4219
-66.1	27.9062	28.7656	26.2656
-66	28.1094	24.8281	25
-65.9	27.2344	29.75	26.3594
-65.8	28.8281	26.4219	27.2812
-65.7	27.7656	28.9062	28.8438
-65.6	26.2031	27.1875	26.75
-65.5	27.7812	27.3594	25.4531
-65.4	27.8438	25.0469	26.4531
-65.3	26.1094	27.7188	25.4219
-65.2	27.8281	28.125	26.9844
-65.1	27.1719	26.625	24.2812
-65	27.0156	27.1562	25.6562
-64.9	29	26.2969	27.0938
-64.8	27.5312	27.4844	27.3438
-64.7	27.4688	26.4844	27.8281
-64.6	29.2969	28.4688	25.2969
-64.5	27.3125	27.3906	27.2031
-64.4	27.875	27.3125	25.6875
-64.3	29.1875	25.25	26.2812
-64.2	28.4844	27.2656	25.1719
-64.1	27.8438	27.875	27.1094
-64	28.0938	27.3906	25.9219
-63.9	27.4688	26.3281	27.4688
-63.8	29.3281	27.25	27.5156
-63.7	27.5312	28.1406	25.3906
-63.6	29.4375	25.8438	25.9688
-63.5	28.3594	30.2344	26.8438
-63.4	27.9062	25.9531	28.1406
-63.3	29.7188	27.0156	27.3594
-63.2	26.2031	27.2031	27.375
-63.1	26.6719	27.4531	26.125
-63	28.3281	26.5156	29.25
-62.9	28.7969	28.7031	27.125
-62.8	27.6562	27.8281	26.7969
-62.7	29.1406	28.4688	26.125
-62.6	27.7812	29.3906	27.7656
-62.5	27.0156	26.1719	28.2031
-62.4	27.3281	27.4688	25.5625
-62.3	27.7969	26.3906	28.625
-62.2	29.7656	27.3594	25.7969
-62.1	27.6406	27.6875	28.7969
-62	27.6562	27.7656	28.0781
-61.9	28.5	27.4688	27.125
-61.8	28.2969	26.4375	25.6875
-61.7	28.9062	28.4844	26.6719
-61.6	28.8125	28.5312	28.0625
-61.5	29.0469	27.875	29.4062
-61.4	29.8438	26.3438	25.4531
-61.3	29.875	26.5	27.6719
-61.2	27.8125	28.5156	27.3594
-61.1	30.7188	28.6719	27.875
-61	28.5469	28.9219	27.9219
-60.9	27.5469	26.5781	27.1875
-60.8	28.9219	28.2031	27.9219
-60.7	28.1562	26.8281	28.5156
-60.6	30.0156	28.4375	26.9688
-60.5	29.6562	27.5625	27.2812
-60.4	28.7812	27.3594	28.4062
-60.3	29.5	29.3906	27.5
-60.2	28.9844	27.8281	25.9844
-60.1	31.75	28.2656	28.6719
-60	28.875	26.4375	28.2656
-59.9	26.875	27.7969	27.2031
-59.8	28.9531	28.4844	27.7031
-59.7	29.8594	26.5312	29.3594
-59.6	27.4375	28.375	28.4844
-59.5	29.0312	27.5156	27.9062
-59.4	28.6562	29.4688	28.1406
-59.3	29.6406	29.7344	27.2969
-59.2	27.3281	28.0312	27.7344
-59.1	28.6875	27.8438	28.4531
-59	29.8281	27.8594	26.6875
-58.9	27.9531	28.3438	28.0938
-58.8	30.6719	28.0625	29.5
-58.7	28.8281	28.5	29.4219
-58.6	27.5469	29.5156	26.5938
-58.5	29.2812	28.875	27.2344
-58.4	28.1094	27.4062	29.2812
-58.3	30.1562	27.8594	29.0156
-58.2	27.1562	28.5781	28.0781
-58.1	31.4375	26.7656	27.8438
-58	30.375	28.2656	28.6562
-57.9	26.9375	28.0781	26.6719
-57.8	28.8906	31.6094	27.875
-57.7	28.4844	27.9375	28.3125
-57.6	27.3906	27.1094	30.7969
-57.5	28.3438	30.3594	28.375
-57.4	29.0469	28.0156	28.3125
-57.3	27.4688	28.4062	27.6406
-57.2	28	29.4375	28.3438
-57.1	29.9375	26.0781	28.2344
-57	28.6406	28.7656	29.7031
-56.9	29.7188	28.375	27.4062
-56.8	29.7812	27.1562	29.3594
-56.7	29.7031	28.375	27.625
-56.6	26.4375	29.4531	28.5938
-56.5	29.4844	28.4219	28.5469
-56.4	28.4531	27.9062	27.8281
-56.3	30.5625	30.9375	31.0312
-56.2	28.7188	27.8594	28.0469
-56.1	29.4062	28.9844	26.375
-56	28.3906	30.7812	28.7812
-55.9	27.5	27.2656	29.1562
-55.8	29.25	28.8594	28.2188
-55.7	27.5781	29.3281	26.8906
-55.6	27.7188	27.8281	26.9844
-55.5	28.8438	29.0938	29.8281
-55.4	30.6562	28.2969	28.9844
-55.3	28.9688	30.6875	29.6406
-55.2	28.25	28.4688	29.0312
-55.1	26.2344	28.4062	29.25
-55	30.0156	29.3594	29.0469
-54.9	28	29.8594	28.2188
-54.8	28.2344	27.9375	28.7031
-54.7	29.2656	29.125	27.5
-54.6	28.125	29.4219	29.1406
-54.5	28.7969	27.6719	30.0469
-54.4	30.2031	29.3438	28.8594
-54.3	27.8438	30.4375	29.5938
-54.2	28.5469	29.5156	28.6406
-54.1	28.9062	31.9844	27.4688
-54	28.2344	27.6562	28.5781
-53.9	29.6094	29.1875	29.0312
-53.8	28.7188	28.375	28.2188
-53.7	27.4062	29.9219	29.1094
-53.6	27.6094	31.2344	29.3438
-53.5	27.7812	28	29.7031
-53.4	28.5	30.8594	28.2031
-53.3	27.0938	29.2656	28.1719
-53.2	30.8594	29.0625	28.8281
-53.1	27.9219	28.3281	28.8438
-53	28.3438	29.5938	29.6094
-52.9	28.9219	30.6094	30.3125
-52.8	28.1562	29.2031	28.8906
-52.7	29.3281	29.4375	30.1562
-52.6	27.4844	28.4062	28.4219
-52.5	26.2188	28.3438	30.7656
-52.4	27.8906	28.7031	27.8906
-52.3	27.9375	30.3906	31.4844
-52.2	26.7812	29.5156	29.1719
-52.1	27.3125	30.2188	27.9375
-52	28.4062	29.3594	30.4062
-51.9	29.9531	28.4688	26.0781
-51.8	25.2031	31.2344	29.1406
-51.7	26.9062	30.1094	28.6406
-51.6	27.4375	27.5469	29.3594
-51.5	25.4688	30.7812	30.5781
-51.4	29.9062	30.5156	29.5
-51.3	26.6719	27.0625	27.1875
-51.2	26.2969	29.7344	28.625
-51.1	26.6094	28.0625	30.6875
-51	28.6719	30.6562	27.6094
-50.9	24.6719	29.7031	29.9375
-50.8	28.9531	28.9531	30.75
-50.7	26.5781	29.9688	29.7344
-50.6	25.3438	29.9219	30.4531
-50.5	25.6406	28.8594	28.9688
-50.4	27.7031	28.4688	30.6562
-50.3	26.3281	30.5781	27.6875
-50.2	26.4531	29.8125	29.5312
-50.1	24.1875	29.2188	28.9531
-50	28.0625	29.4844	30.0156
-49.9	26.5469	30.2031	28.3125
-49.8	25.1406	31.125	29.875
-49.7	27.4531	28.6719	30.1094
-49.6	25.2969	30.0625	29.4375
-49.5	24.9062	29.2344	28.0156
-49.4	24.3594	31.7031	29.1562
-49.3	26.375	28.9375	29.0469
-49.2	25.0312	29.25	30.8594
-49.1	25.8906	29.6875	29.3906
-49	24.5156	29.5938	29.4844
-48.9	25.9531	28.0469	30.2344
-48.8	24.1562	30.2969	30.0625
-48.7	23.2188	27.5156	28.1094
-48.6	23.7969	31.6094	29.1094
-48.5	21.2812	28.9062	30.5
-48.4	23.2656	28.4531	28.4844
-48.3	22.2031	29.8281	29.625
-48.2	25.375	29.75	29.8125
-48.1	24.4688	30.4219	29.2656
-48	23.1719	28.8906	27.1875
-47.9	22.5625	31.5312	28.5938
-47.8	22.3594	26.4219	29.9844
-47.7	22.5625	30.8594	28.0938
-47.6	23.7969	28.2656	28.8438
-47.5	19.6094	28.7031	29.25
-47.4	20.7031	27.875	30.875
-47.3	20.7031	29.2344	28.3594
-47.2	23.8594	29.1562	30.5312
-47.1	19.5938	27.7656	28.2188
-47	20.375	28.3125	28.1094
-46.9	19.9219	29.2656	29.3281
-46.8	20.9688	28.875	31.2031
-46.7	19.2656	28.0781	27.8281
-46.6	19.4062	30.4531	29.5
-46.5	19.9375	28.4688	29.0469
-46.4	19.7812	28.7188	29.4219
-46.3	18.6875	28.6406	30.0938
-46.2	17.4375	28.3438	29.9062
-46.1	18.5156	27.4062	29.3438
-46	17.1562	26.8906	31.0781
-45.9	19.5781	30.3594	28.25
-45.8	16.9375	28.875	29.3594
-45.7	17.1719	28.0469	30.4531
-45.6	16.2031	27.8594	30.75
-45.5	16.5781	28.25	29.4688
-45.4	15.5781	27.4219	28.8125
-45.3	14.9688	28.9062	27.6719
-45.2	15.4531	28.1875	29.7344
-45.1	14.625	26.625	30.2812
-45	13.3906	30.3281	26.25
-44.9	14.1562	27.3125	31.1094
-44.8	12.5156	27.9844	29.5781
-44.7	13.7812	28.4219	29.1719
-44.6	11.7656	28.6562	29.75
-44.5	12.7188	29.1562	29.5625
-44.4	10.9375	28.8906	28.125
-44.3	14.6719	25.5312	29.5
-44.2	12.6562	26.6562	29.4219
-44.1	11.6719	29.4219	29.7188
-44	10.5156	29.0156	29.75
-43.9	7.51562	25.1094	29.1406
-43.8	9.1875	26.3906	28.7969
-43.7	8.26562	28.5	30.2812
-43.6	8.10938	27.2188	30.0938
-43.5	9.20312	26.0625	29.2188
-43.4	8.79688	27.1562	29.2031
-43.3	6.70312	28.2344	29.2969
-43.2	3.90625	27.0312	30.5156
-43.1	7.70312	26.25	29.125
-43	5.60938	27.5625	28.625
-42.9	5.79688	28.4375	29.5312
-42.8	6.21875	26.8594	28.5
-42.7	3.96875	26.2031	29.25
-42.6	3.73438	29.8125	29.5938
-42.5	4.10938	26.3438	30.1719
-42.4	0.3125	26.5	29.6875
-42.3	2.45312	25.8906	27.4375
-42.2	0.953125	25.5781	28.6875
-42.1	1.625	29.2031	31.1094
-42	-0.03125	25.9375	31.25
-41.9	-1.35938	25.5781	29.0312
-41.8	-2.04688	28.3125	27.6094
-41.7	-2.89062	26.0781	29.0469
-41.6	-1.03125	26.5312	28.9219
-41.5	-3.51562	26.2031	28.4219
-41.4	-3.82812	27.1562	28.7188
-41.3	-3.875	24.5625	28.9219
-41.2	-5.375	26.4375	30.125
-41.1	-6.89062	25.9375	28.5625
-41	-8.09375	27.0938	29.6875
-40.9	-5.125	26.375	29.1562
-40.8	-8	25.4062	28.2031
-40.7	-9.59375	23.8125	28.9375
-40.6	-7.95312	26.0312	28.875
-40.5	-9.82812	26.1719	28.1562
-40.4	-8.01562	24.4062	27.4844
-40.3	-11.5781	26.5938	27.8594
-40.2	-11.0781	26	29.6875
-40.1	-11.2969	25.3281	29.0781
-40	-11.4062	25.25	28
-39.9	-10.75	25.9062	28.1875
-39.8	-14.7188	26.4844	28.75
-39.7	-13.2188	25	29.7812
-39.6	-15.4688	24.9219	27.7812
-39.5	-13.875	25.5625	28.9688
-39.4	-16.0781	25.7344	27.1719
-39.3	-17.2344	24.1875	27.8594
-39.2	-17.2969	26.2344	29.4219
-39.1	-17.1875	24.8281	27.7812
-39	-20.125	25.8438	28.3438
-38.9	-19.4844	24.4062	28.7031
-38.8	-20.7031	23.5	28.9844
-38.7	-22.5	24.4062	29.3906
-38.6	-20.9375	24.8594	28
-38.5	-22.6094	23.9688	28.7344
-38.4	-23.9375	25.4844	28.5312
-38.3	-23.5938	22.3594	29.875
-38.2	-22.4844	25.2812	27.0156
-38.1	-22.4531	24.4062	27.8438
-38	-24.4531	24.7812	29.25
-37.9	-26.4688	24.8438	28.8594
-37.8	-26.3438	27.2344	28.25
-37.7	-27.625	23.2969	27.4688
-37.6	-30.0938	24.7344	30.0938
-37.5	-29.9844	23.8906	28.5938
-37.4	-28.5781	24.4062	28.1875
-37.3	-30.5156	22.5938	28.3438
-37.2	-31.1875	23.75	26.9531
-37.1	-32.3906	22.8906	28.2812
-37	-31.8281	24	27.8281
-36.9	-33.0469	23.2188	26.7188
-36.8	-32.3438	23.8438	28.5625
-36.7	-33.1562	23.2812	27.6406
-36.6	-34.9375	23.1094	28.3594
-36.5	-35.2969	23.9688	29.5
-36.4	-36.5781	24.9531	25.2188
-36.3	-36.0156	21.5312	27.2812
-36.2	-37.3594	21.9375	29.9219
-36.1	-35.2344	23.9844	27.125
-36	-36.5312	23.2031	28.0938
-35.9	-37.1562	21.7031	27.1094
-35.8	-38.0156	21.8125	29.0625
-35.7	-40.2188	23.5156	28.5469
-35.6	-41.0156	21.7812	29.7031
-35.5	-37.9531	23.9219	28.6562
-35.4	-39.1875	23.375	27.1875
-35.3	-38.9062	20.8906	28.6719
-35.2	-43.2812	21.7344	27.1094
-35.1	-42.6094	22.6719	27.8906
-35	-43.25	21.6719	26.6094
-34.9	-41.5	21.5	28.2344
-34.8	-42.6562	21.4531	28.6562
-34.7	-42.4531	23.0156	27.2031
-34.6	-42.9375	20.3594	25.9688
-34.5	-42.9219	21.4688	27.7969
-34.4	-44.9688	22.25	28.4688
-34.3	-45.2969	21.4375	25.1875
-34.2	-45.6094	20.9062	26.2656
-34.1	-45.1094	19.8281	26.9219
-34	-47.1719	22.0156	28.0469
-33.9	-48.2812	21.8281	28.4531
-33.8	-46.2344	21.3438	26.9531
-33.7	-47.6562	21.0938	28.6562
-33.6	-48.5156	22.5938	26.375
-33.5	-47.5781	19.6875	26.8125
-33.4	-47.1719	22.9688	26.5938
-33.3	-49.7656	21.1875	27.7969
-33.2	-50.0469	23.2188	26.5781
-33.1	-50.75	20.7344	27.375
-33	-49.7969	21.1875	27.7812
-32.9	-50.4375	20.4375	28.5625
-32.8	-50.5	21.1875	26.8125
-32.7	-50.8281	21.9375	27.3906
-32.6	-49.7031	23.5	26.375
-32.5	-51.6562	21	27.3594
-32.4	-50.4844	20.9375	27.3281
-32.3	-50.5938	21.25	28.3438
-32.2	-53.8594	22.9062	25.2812
-32.1	-53.4219	19	26.9062
-32	-53.5625	21.3281	28.6562
-31.9	-52.9062	20.0938	27.1875
-31.8	-53.5	21.1094	26.7812
-31.7	-54.1875	21.2344	26.5
-31.6	-53.1562	21.7344	27.2812
-31.5	-56.4531	19.2344	26.0312
-31.4	-53.7188	19.6406	28.8125
-31.3	-57.0781	21	25.9531
-31.2	-55.0469	20.5469	25.7344
-31.1	-54.9688	20.1094	27.8906
-31	-53.8125	17.2656	24.9531
-30.9	-54.9375	20.9688	29.9062
-30.8	-54.9688	19.5781	28.1562
-30.7	-57.0938	21.5312	27.125
-30.6	-53.3438	22.5	27.4375
-30.5	-55.7031	20.2188	26.6875
-30.4	-54.4219	19.5312	28.4844
-30.3	-56.2188	19.8281	27.1875
-30.2	-57.3281	19.4375	27.7031
-30.1	-57.2188	19.5469	27.7188
-30	-56.8594	19.5938	26.8125
-29.9	-55.5781	19.4844	27.0156
-29.8	-56.5156	20.6875	28.0469
-29.7	-56.25	19.9062	28.0625
-29.6	-56.4688	20.4531	27.7812
-29.5	-58.875	18.0156	25.9688
-29.4	-58.2656	20.25	28.3438
-29.3	-58.1406	18.0625	27.4219
-29.2	-57.7969	19.7188	28.6875
-29.1	-55.9688	18.0156	27.625
-29	-59.2656	20	28.1875
-28.9	-56.0625	21.5	25.9688
-28.8	-56.8438	18.5625	27.7656
-28.7	-58.5	18.5	27.6875
-28.6	-56.6094	19.9375	28.6875
-28.5	-57.8125	20.8281	26.7969
-28.4	-58.875	19.25	28.3125
-28.3	-57.6562	21.6875	27.1562
-28.2	-58.1562	16.8594	27.3125
-28.1	-57.875	20.8281	28.3125
-28	-60.0156	18.2656	27.125
-27.9	-58.5469	20.0156	27.0781
-27.8	-56.3281	19.9688	28.4844
-27.7	-60.1562	20.3125	27.9531
-27.6	-59.1719	19.2812	27.7969
-27.5	-57.9531	20.75	26.75
-27.4	-58.6562	18.0469	28.7812
-27.3	-59.7344	17.9531	26.8438
-27.2	-59.9531	19.8125	28.3281
-27.1	-57.7656	18.5156	28.4219
-27	-59.125	19.3594	25.7344
-26.9	-61.0625	20.1719	28.625
-26.8	-58.2344	18.0469	27.4688
-26.7	-57.6406	17.8438	28.3125
-26.6	-60.8125	20.6406	27.7656
-26.5	-60.4844	17.5469	25.7344
-26.4	-57.4062	20.7656	28.0625
-26.3	-58.4844	17.2344	26.2031
-26.2	-57.2969	17.4688	27.25
-26.1	-59.2812	22.9531	28.1406
-26	-59.0312	18.1406	28.9688
-25.9	-59.3438	19.5469	26.7812
-25.8	-59.5312	20.2969	26.5469
-25.7	-60.8125	19.0156	27.5469
-25.6	-60.0625	20.4062	29.2344
-25.5	-59.4688	19.4375	27.3281
-25.4	-58.5781	18.4688	25.7188
-25.3	-58.0625	19.0625	28.4219
-25.2	-59.4531	17.625	26.6406
-25.1	-59.2344	19.4844	26.8281
-25	-55.625	20.7031	28.2969
-24.9	-58.6406	17.9844	26.0781
-24.8	-59.875	19.4531	26.2344
-24.7	-59.2344	16.1719	26.5469
-24.6	-59.7344	20	27.3438
-24.5	-57.6719	19.8906	28.6719
-24.4	-59.5781	19.4219	26.5
-24.3	-60.0156	19.1094	27.7969
-24.2	-57.5312	20.5625	27.6094
-24.1	-55.625	19.2344	29.7656
-24	-54.375	19.7344	30.4844
-23.9	-57.5625	18.7188	27.7031
-23.8	-61.3438	18.0625	27.4531
-23.7	-58.1406	19.4531	29.875
-23.6	-57.7031	19.4688	27
-23.5	-56.625	20.375	28.1094
-23.4	-60.25	17.4844	28.0312
-23.3	-56.8906	18.2031	27.9219
-23.2	-58.3594	18.0469	28.0469
-23.1	-59.625	19.7031	28.9688
-23	-58.3281	20.9688	28.8438
-22.9	-56.5625	18.0938	25.1875
-22.8	-54.9219	19.7969	31.375
-22.7	-55.8125	20.4844	27.0938
-22.6	-57.7188	19.6719	27.9688
-22.5	-55.5312	21.5312	30.4531
-22.4	-57.25	17.9844	26.4844
-22.3	-58.4844	21.25	28.2969
-22.2	-57	19.0625	29.2969
-22.1	-56.4062	17.0625	28.2969
-22	-54.2188	22.0938	30.5156
-21.9	-57.6719	20.5625	28.7812
-21.8	-55.9062	19.8906	29.4062
-21.7	-55.9062	21.0312	28.6094
-21.6	-57.375	18.2188	27.1562
-21.5	-55.0781	20.9844	29.3281
-21.4	-55.0156	20.1875	27.5312
-21.3	-56.7031	18.5625	30.375
-21.2	-55.1094	21.0781	29.4219
-21.1	-56.5781	19.5781	29.1875
-21	-53.9219	22.2969	30.6562
-20.9	-56.625	19.625	28.8125
-20.8	-54.5469	20.2969	29.5938
-20.7	-54.6094	18.7656	28.0781
-20.6	-54.8906	19.4375	27.0156
-20.5	-55.75	21.3906	31.25
-20.4	-55.0781	20.5781	29.2969
-20.3	-54.5312	19.6719	28.875
-20.2	-54.4844	21.0781	29.6406
-20.1	-53.4844	21.2969	29.0625
-20	-52.9844	21.6875	29.9531
-19.9	-55.4531	20.6406	29.4062
-19.8	-53.3125	19.5469	28.1094
-19.7	-51.875	20.9531	30.4219
-19.6	-53.5	19.4531	31.1406
-19.5	-52.8594	22.7656	30.0469
-19.4	-54	19.3438	28.2969
-19.3	-53.9219	20.3906	29.9375
-19.2	-51.25	19.8906	28.9844
-19.1	-51.9688	20.0781	31.8125
-19	-50.5	20.5781	32.3438
-18.9	-54.6875	17.7031	28.7969
-18.8	-49.5469	20.7969	29.1406
-18.7	-50.9844	20.0312	30.4531
-18.6	-51.4688	22.9531	30.1875
-18.5	-52.875	22.2969	30.0312
-18.4	-52.6562	18.6875	30.3594
-18.3	-52.2656	20.8125	28.5312
-18.2	-48.3906	22.3594	30.7344
-18.1	-49.8906	19.4531	29.9375
-18	-49.4219	22.2031	29.2656
-17.9	-51.9219	20.25	30.2656
-17.8	-48.9375	21.8594	28.5781
-17.7	-49.8438	23.0469	30.6406
-17.6	-51.2344	21.4844	30.5469
-17.5	-48.4688	24.3906	33.125
-17.4	-49.0312	18.0312	30.0469
-17.3	-50.3125	21.9219	29.8438
-17.2	-48.6406	20.8906	30.75
-17.1	-47.5625	21.3281	30.5469
-17	-45.5	23.6719	32.8281
-16.9	-48.75	21.4062	28.5781
-16.8	-48.2344	20.1094	31.5781
-16.7	-48.7656	21.2969	30.0312
-16.6	-46.4844	20.9688	31.125
-16.5	-45.3125	25.0156	34.1094
-16.4	-48.8438	21.1875	29.9688
-16.3	-49.9531	21.5781	31.1562
-16.2	-48.125	24	32.3906
-16.1	-46.0312	20.6094	29.0312
-16	-45.4688	24.7031	33.0469
-15.9	-48.4375	19.3906	30.3281
-15.8	-47.2344	22.7969	32.9688
-15.7	-47.7188	23.3281	32.5156
-15.6	-46.6875	25.0938	33.8125
-15.5	-45.8281	26.4062	33.7656
-15.4	-47.6562	21.0156	30.4531
-15.3	-44.2969	24.3594	31.6562
-15.2	-46.4844	23.1719	34.0938
-15.1	-42.5781	22.7188	31.3906
-15	-42.2812	25.125	34.4219
-14.9	-45	24.5469	31.2969
-14.8	-43.1875	24.5625	30.625
-14.7	-45.4844	22.9062	30.4219
-14.6	-46.0156	22.6719	33.5781
-14.5	-42.3438	24.0625	32.6562
-14.4	-44.7031	22.0781	33.0469
-14.3	-42.875	23.5312	31.0781
-14.2	-42.7969	23.2344	32.8125
-14.1	-41.2812	24.9062	31.9375
-14	-41.5469	25.0625	33.5625
-13.9	-42.25	23.0781	31.3438
-13.8	-41.7344	24.2656	32.1719
-13.7	-42.5	24.5312	32.1562
-13.6	-40.625	24.9688	35.2031
-13.5	-40.4688	23.375	33.1875
-13.4	-42.4375	24.8281	33.4062
-13.3	-42.125	23.2969	31.3281
-13.2	-40.5938	26.4688	33.8125
-13.1	-40.6562	24.4844	33.6094
-13	-36.9688	25.7656	35.8438
-12.9	-39.7656	24.5625	33.3594
-12.8	-37.9375	25.2344	33.6875
-12.7	-34.9844	27.6406	36.0938
-12.6	-39.5	25.1719	33.5781
-12.5	-38.0469	26.5312	35.9531
-12.4	-40.6719	23.5781	34.6406
-12.3	-38.5312	27.1719	33.9375
-12.2	-37.4219	26.0156	37.3906
-12.1	-39.9688	27.4219	34.5938
-12	-36.7188	26.875	37.6875
-11.9	-39.8906	24.7188	34.5625
-11.8	-37.0469	24.0156	33.2188
-11.7	-34.9844	28.6406	36.5781
-11.6	-36.8594	26.5625	36.0156
-11.5	-37.625	26	36
-11.4	-37.5781	28.6719	35.5
-11.3	-37.125	24.0312	34.5312
-11.2	-34.6406	28.5469	37.3438
-11.1	-36.3594	25.875	33.4688
-11	-32.9375	28.5625	38.0469
-10.9	-35.8281	26.4062	34.7656
-10.8	-35.2188	26.8438	36.6094
-10.7	-35.1406	28.6875	34.375
-10.6	-32.6094	28.3438	38.6562
-10.5	-34.2188	27.5938	37.4531
-10.4	-34.75	26.8125	35.1875
-10.3	-33.0156	26.5156	36.7656
-10.2	-34.2188	27.5625	35.6094
-10.1	-31.4844	29.7188	38.375
-10	-32.2188	28.4688	36.5469
-9.9	-34.8281	27.7344	36.4219
-9.8	-31.3281	28.8281	37.3438
-9.7	-32.75	27.9844	36.5312
-9.6	-29.4844	31.5938	38.2031
-9.5	-30.5469	28.9062	38.375
-9.4	-32.4688	27.6094	37.6094
-9.3	-31.4219	29.9062	36.8125
-9.2	-29.8438	28.3125	36.5312
-9.1	-30.0469	31.5781	38.5156
-9	-29.7188	29.1875	38.9062
-8.9	-29.7656	27.7812	37
-8.8	-29.5156	30.6406	37.3594
-8.7	-30.4219	30.6406	36.7812
-8.6	-29.1719	31.7656	39.5781
-8.5	-27.75	28.5156	37.0156
-8.4	-27.8125	30.6406	37.5312
-8.3	-28.7969	30	36.8594
-8.2	-26.8125	30.8438	39.0781
-8.1	-27.4375	30.7812	38.7812
-8	-24.125	30.8125	41.625
-7.9	-27.3594	31.7344	37.7656
-7.8	-26.5156	30.6406	39.2188
-7.7	-26.8438	30.2969	37.5156
-7.6	-24.875	34.9531	41.9219
-7.5	-27.25	31.1094	40.2969
-7.4	-26.625	31.5312	39.1875
-7.3	-24.6719	32.1719	39.8906
-7.2	-26.0938	30.3125	39.625
-7.1	-26.4219	31.7344	38.875
-7	-24.5625	31.8906	39.9531
-6.9	-25.9375	30.25	39.9844
-6.8	-24.8438	33.2656	41.0469
-6.7	-22.9844	32.3906	39.4219
-6.6	-20.6719	34	41.8281
-6.5	-22.0938	32.2188	40.7031
-6.4	-23.0938	31.6406	40.0469
-6.3	-21.7188	32.1875	40.8594
-6.2	-24.5469	33.2344	40.4062
-6.1	-20.9062	33.8594	43.0625
-6	-20.9062	34.7969	40.875
-5.9	-23.0312	29.9688	40.0156
-5.8	-20.9688	33.8594	40.75
-5.7	-20.3906	34.8438	43.6875
-5.6	-16.7188	36.5625	42.1719
-5.5	-20.9688	33.7812	41.4375
-5.4	-20.625	33.9219	40.7031
-5.3	-20.25	31.7656	42.0469
-5.2	-19.0156	35.0938	43.2344
-5.1	-19.4531	36.5625	43.4844
-5	-18.5938	35.1406	42.1875
-4.9	-15.9062	33.3906	42.2031
-4.8	-19.8438	34.0312	41.625
-4.7	-17.1094	37.1094	42.1562
-4.6	-15.7656	35.5	43.1094
-4.5	-15.4219	36.0625	42.5
-4.4	-18.7031	34.1094	44.2344
-4.3	-13.7188	36.5312	42.6875
-4.2	-15.5312	33.3281	42.3594
-4.1	-14.3281	35.4531	45.4062
-4	-13.25	38.4688	44.375
-3.9	-15.9844	35.2656	42.125
-3.8	-14.0938	36.9688	43.0156
-3.7	-14.5781	37.1719	44.2656
-3.6	-13.6562	37.8281	45.7188
-3.5	-11.8438	35.3438	45.1875
-3.4	-13.875	34.9844	43.4219
-3.3	-14.1875	38.1406	46.3125
-3.2	-11.6875	38.3125	45.6406
-3.1	-12.3125	37.3906	42.9219
-3	-11.8125	36.6875	47.2188
-2.9	-12.8594	37.2188	43.9375
-2.8	-13.25	36.6875	44.625
-2.7	-11.4375	36.4375	45.0938
-2.6	-7.40625	40.0625	45.1562
-2.5	-10.4375	40.5312	48.3906
-2.4	-9.90625	37.4844	45.6875
-2.3	-12.1406	38.1094	45.3906
-2.2	-9.07812	39.5781	45.6406
-2.1	-8.28125	41.2188	47.4531
-2	-7.89062	37.6094	46.0469
-1.9	-10.7344	38.6719	45.8594
-1.8	-8.76562	39.0625	46.5
-1.7	-8.17188	41.0312	45.375
-1.6	-8.01562	41.9062	49.5156
-1.5	-8.125	39.5156	47.4375
-1.4	-10.2188	39.6875	48.2344
-1.3	-7.625	41.875	47.6094
-1.2	-8.40625	39.9062	47.7031
-1.1	-3.10938	41.9062	48.8906
-1	-7.35938	41.6562	46.0312
-0.9	-7.84375	38.3594	47.9219
-0.8	-7.79688	41.4531	48.9219
-0.7	-6.79688	40.0938	47.125
-0.6	-2.70312	43.4375	49.5
-0.5	-3.92188	41.8281	49.0156
-0.4	-4.28125	39.9375	47.9688
-0.3	-4.0625	43.6406	48.4531
-0.2	-5.3125	40.8906	49.2656
-0.1	-2.29688	44.5	51.9844
0	-4.10938	41.6875	47.4375
0.1	-4.9375	42.9219	47.9062
0.2	-3.40625	41.3281	47.8906
0.3	-3.10938	45.1094	49.375
0.4	-2.04688	43.375	51.0625
0.5	-1.57812	42.2812	50
0.6	-2.48438	41.7031	48.5781
0.7	-2.3125	41.6719	49.7812
0.8	-2.17188	44.2344	49.4062
0.9	1.96875	44.6562	50.1562
1	0.671875	44.7188	49.5781
1.1	1.48438	42.7188	51.9062
1.2	-2.40625	44.9062	49.0938
1.3	0.640625	44.4219	51
1.4	2.04688	46.5312	51.5
1.5	0.375	45.125	51.0781
1.6	1.79688	45.3281	51.9844
1.7	1.28125	45.0781	49.8125
1.8	0.421875	43	51.9219
1.9	4.71875	47.9219	51.7344
2	3.82812	45.4844	52.4219
2.1	3.59375	47.7344	53.8125
2.2	3.10938	44.625	51.5469
2.3	5.95312	45.8281	52.0938
2.4	4.14062	45.7188	52.4531
2.5	2.85938	48.1562	53.4219
2.6	3.17188	47.8594	52.0938
2.7	4.64062	46.9531	52.3594
2.8	4.29688	47.1094	53.7656
2.9	5.01562	48.9062	53.3281
3	5.375	47.5312	54.0312
3.1	5.25	47.5781	53.1875
3.2	3.07812	47.7969	52.4219
3.3	6.59375	46.5781	52.3438
3.4	7.73438	49.5938	54.8906
3.5	6.92188	47.1094	53.1094
3.6	7.42188	47.9688	54.2031
3.7	5.78125	46.0781	52.8438
3.8	7.59375	47.2344	54.4688
3.9	9.96875	50.5625	56.2031
4	9.3125	50.3281	56.0625
4.1	8.98438	48.0625	55.3281
4.2	10.125	49.4219	51.9375
4.3	8.01562	48.8594	55.2188
4.4	11.125	52.0469	57.2969
4.5	12.0312	47.75	55.5
4.6	11.3906	49.5312	54.4375
4.7	10.2188	48.8906	55.3125
4.8	11.25	50.4531	56.5469
4.9	13.2812	49.7344	56.3906
5	11.25	50.7344	56.9531
5.1	13.4688	50.7344	54.2812
5.2	12.5312	51.4219	54.0469
5.3	11.9375	51.125	56.0625
5.4	11.9844	50.7188	58.1875
5.5	14.7812	52.4531	56.5312
5.6	12.5	50.8281	56.6719
5.7	12.125	50.2031	56.4688
5.8	14.7344	52.4062	56.7188
5.9	15.5625	53.2031	57.4844
6	14.7188	53.1094	57.3906
6.1	14.9062	52.2031	57.0312
6.2	12.9531	49.9375	55.8594
6.3	15.375	53.5781	58.8125
6.4	18.0781	55.4531	59.8438
6.5	17.1094	52.8125	58.5312
6.6	15.2031	53.2656	57.6406
6.7	16.1406	50.5938	58.4531
6.8	16.2188	53.5312	58.375
6.9	17.4531	54.6875	57.9219
7	17.7812	53.7656	57.1406
7.1	18.0469	55.25	57.6406
7.2	16.3906	54.4688	56.4844
7.3	17.5625	54.2031	59.4844
7.4	20.3906	54.6875	59.4219
7.5	17.8906	55.0781	59.9375
7.6	19.8594	56.9844	59.8125
7.7	19.0312	52.2969	59.5156
7.8	19.5625	53.1875	59.7344
7.9	20.5781	56.0781	60.4531
8	19.6406	55.5312	59.7188
8.1	23.1719	56.7344	61.5469
8.2	18.7031	55.25	58.6875
8.3	20.2344	54.3594	59.9531
8.4	23.3438	58.4219	61.125
8.5	22.3906	56.5625	60.6719
8.6	21.7031	57.0781	59.5
8.7	22.0469	54.7656	60.8438
8.8	22.8594	55.25	61.4531
8.9	23.5312	57.7656	60.4375
9	22.4219	58.1094	60.9375
9.1	23.5625	56.4531	61.1875
9.2	24.625	56.6406	61.9688
9.3	22.7656	59.3438	61.5469
9.4	24.875	55.9688	63.0625
9.5	24.25	58.4688	61.3125
9.6	26.4688	58.5312	63.0938
9.7	25.875	56.3438	59.8906
9.8	25.25	58.6406	61.4531
9.9	25.1406	59.8125	62.0625
10	26.4375	57.4375	63.1094
10.1	27.2656	59.9375	63.9375
10.2	25.0469	59.25	60.4688
10.3	26.4531	58.0312	64.4219
10.4	27.5	59.25	64.7812
10.5	29.4531	58.8125	64.4688
10.6	26.9219	61.8125	61.2969
10.7	27.1719	58.3281	61.1406
10.8	28.7812	61.2969	64.375
10.9	29.3125	59.9844	65.2188
11	28.9375	61.3125	64.125
11.1	29	60.125	62.5156
11.2	29.2656	59.6406	64.7656
11.3	29.2031	60.6719	63.9062
11.4	30.4688	61	65.0938
11.5	30.9219	59.1094	64.8594
11.6	30.5625	60.6719	65.5781
11.7	28.5625	60.2344	62.5469
11.8	33.3281	61.0938	66.0938
11.9	33.0156	63.3594	65.4688
12	31.9375	59.8438	66.7031
12.1	31.3906	60.9375	65.7344
12.2	30.5469	60.9531	64.5938
12.3	32.9531	60.0469	64.6719
12.4	33.2656	61.9531	65.9375
12.5	34.7969	61.1719	67.0625
12.6	31.3125	63.6562	67.0156
12.7	30.5	61.2031	66.1094
12.8	34.9844	62.7656	64.1094
12.9	34.6562	63.375	68.1719
13	34.0781	62.9375	67.0938
13.1	35.6875	63.5	66.1406
13.2	34.4375	63.1406	65.7969
13.3	37.4688	61.9688	66.3594
13.4	36.6875	65	67.8125
13.5	35.1094	65.2656	67.7812
13.6	36.8281	63.7344	65.7656
13.7	34.7188	63.4844	65.125
13.8	36.6875	62.5312	68.0938
13.9	36.0469	65.7969	68.75
14	37.2656	65.7031	66.4375
14.1	36.7969	64.7656	66.6094
14.2	36.7812	63.4219	67.1719
14.3	38.5625	65.4219	69.3906
14.4	39.2969	64.7031	67.0469
14.5	37.75	63.25	68.5156
14.6	38.125	65.9219	68.3906
14.7	37.8281	65.875	67.875
14.8	38.1406	65.1406	68.7656
14.9	39.375	67.5938	69.625
15	39.3594	64.9688	67.8594
15.1	41.5938	66.2969	69.1406
15.2	39.3281	65.1719	70.5
15.3	42.1094	66.2188	67.3438
15.4	39.6875	66.6406	69.5625
15.5	42.8125	67.7812	70.5312
15.6	39.4688	67.2969	69.3438
15.7	39.625	65.7344	69.4375
15.8	42.3281	65.7812	70.4844
15.9	42.5156	68.4219	69.7969
16	42.375	68.5312	69.0469
16.1	43.875	67.5156	71.3906
16.2	43.1406	66.6406	68.9844
16.3	43.3438	66.0938	70.9531
16.4	43.3594	67.2656	70.9688
16.5	42.875	69.2344	71.7656
16.6	44.2344	66.75	72.2031
16.7	43.1875	67.0938	68.5312
16.8	43.5938	67.8125	69.8906
16.9	46.5781	69.2656	72.7812
17	45.1406	69.9844	68.875
17.1	44.7344	68.8438	73.0469
17.2	45.1562	69.4688	69.7031
17.3	45.625	67.9219	71.2969
17.4	46.3281	68.9062	74.4375
17.5	46.9219	69.6562	71.4375
17.6	46.4219	69.5938	70.3438
17.7	43.8281	68.6875	70.5625
17.8	46.3125	66.9844	71.9219
17.9	48.0156	70.25	73.0312
18	47.5	70.6719	73.3906
18.1	46.5	70.4219	69.6875
18.2	46.5625	70.9531	72.3281
18.3	48.2344	68.5156	73.1406
18.4	48.5469	72.4062	73.4375
18.5	47.8906	70.8438	72.25
18.6	49.2969	71.5625	72.75
18.7	46.5781	69.6406	72.6719
18.8	47.0625	69.0469	72.1406
18.9	48.4219	72.8281	74.2031
19	49.75	71.5156	71.9688
19.1	48.7344	71.4062	71.7812
19.2	50.375	71.9844	73.7812
19.3	48.2656	70.8438	74.0625
19.4	48.625	73.0781	73.2969
19.5	51.2969	70.6094	72.1719
19.6	48.4844	73.0625	73.2188
19.7	51.4531	70.125	73.5938
19.8	52.4062	71.1406	71.7969
19.9	52.2969	72.7344	74.9062
20	51.9844	73.5	75.5625
20.1	50.4531	72.4219	72.0938
20.2	51.375	71.625	74.3281
20.3	51.9531	72.8438	75.0156
20.4	54.1875	73.625	74.5938
20.5	52.8906	74.6406	77.2969
20.6	52.6094	71.6406	74.1094
20.7	52.0312	71.7188	73.5
20.8	52.5469	73.125	74.6094
20.9	53.6875	74.375	76.7344
21	53.875	75	74.2188
21.1	53.7344	73.8125	74.7031
21.2	51.9844	73.0938	74.7031
21.3	53.3594	74.5312	76.375
21.4	56.25	75.0469	73.8125
21.5	56.1562	74.375	77.1406
21.6	56.3281	73.75	74.8594
21.7	53.2969	70.9219	75.9375
21.8	53.7969	75.7188	76.9062
21.9	55.5938	73.9375	76.9844
22	53.25	76.4531	74.9375
22.1	56.3438	74.25	76.375
22.2	56.0781	74.2344	74.1562
22.3	57.7344	74.6719	76.0938
22.4	58.75	76.1094	78.4219
22.5	56.4531	74.0625	76.6875
22.6	57.375	75.6875	76.7656
22.7	55.6094	74.2188	76.4219
22.8	56.8906	76.3125	74.5781
22.9	58.4688	75.0156	77.3281
23	56.4062	76.8906	77.0312
23.1	59.1094	76.4688	78.0781
23.2	56.8906	74.6562	75.0938
23.3	57.25	76.2031	77.375
23.4	61.2031	76.4375	79.5469
23.5	59.0312	76.3281	77.4688
23.6	58.6719	77.2812	76.6562
23.7	58.8281	74.8594	77.2969
23.8	58.6406	76.1719	77.1406
23.9	59.8906	78.0938	79.4375
24	60.9375	78.1562	78.3438
24.1	59.5938	77.2031	78.3438
24.2	60.0781	77.3125	78.0781
24.3	59.3906	77.7188	77.5156
24.4	61.7656	78	78.4219
24.5	59.4375	76.25	78.0312
24.6	61.2656	79.2812	79.0312
24.7	61.6875	76.8281	76.8594
24.8	62.7188	79.3281	78.4688
24.9	63.2969	78.1406	79.7344
25	61.0938	78.0938	77.25
25.1	62.2188	78.7656	79.75
25.2	62.7188	76.0469	78.0312
25.3	60.8125	78.4844	79.1562
25.4	62.2969	79.9531	80.6094
25.5	63.6719	79.0781	77.3906
25.6	63.6094	78.3125	80.0781
25.7	62.9688	77.2188	77.0312
25.8	63.0781	78.8906	78.8438
25.9	63.1406	79.8594	81.8281
26	64.375	80.9531	78.9688
26.1	64.875	78.0625	78.7188
26.2	63.9375	77.5625	79.7656
26.3	61.8594	79.3281	80.0938
26.4	65.9688	79.7031	80.0156
26.5	65.4062	80.1875	80.6562
26.6	65.4219	78.5312	81.8281
26.7	65.3594	78.8438	81.2656
26.8	64.6094	79.5625	79.125
26.9	65.9531	81.3281	80.9375
27	64.9688	78.8594	81.5
27.1	65.9375	80.625	79.5312
27.2	64.1406	82.1406	81.8438
27.3	65.7031	78.4062	80.6094
27.4	66.2344	82.4375	81.0781
27.5	68.6094	80.8594	79.2344
27.6	66.0938	80.7969	80.9844
27.7	65.4688	81.7188	79.9844
27.8	64.0625	78.9531	81.3906
27.9	68.3906	81.6875	80.7031
28	68.4375	81.8906	80.2344
28.1	67.0469	80.9531	80.6406
28.2	68.3594	81.0938	82.3125
28.3	68.75	81.7812	81.9531
28.4	67.3438	82.6406	83.0156
28.5	68.9062	80.9062	80.9531
28.6	67.0156	81.875	82.7969
28.7	67.8438	83.2344	81.75
28.8	66.8281	79.9062	80.0156
28.9	70.1406	81.4688	83.5469
29	68.4531	83.3438	82.8281
29.1	67.2031	81.5156	81.2188
29.2	70.2812	81.9219	82.4688
29.3	69.7344	80.5625	82.1406
29.4	69.2188	83.5938	82.7812
29.5	71.1406	82.3906	82.3125
29.6	70.0781	83.4062	85.0312
29.7	69.2969	82.2344	80.0938
29.8	68.8125	81.7656	83.1094
29.9	72.125	83.7656	82.2031
30	69.1719	82.3438	81.4688
30.1	70.9375	83.7031	84.9688
30.2	69.4375	81.2188	82.8125
30.3	68.4375	81.0469	83.0781
30.4	71.75	84.1094	83.875
30.5	72.5469	84.4688	82.875
30.6	70.875	83.375	82.2969
30.7	72.125	81.3594	83.4844
30.8	70	83.2812	82.7031
30.9	71.3281	83.875	83.75
31	73.2656	83.5469	84.4531
31.1	71.7188	84.3281	83.6094
31.2	70.8906	85.7031	86.1094
31.3	70.75	82.3281	82.0469
31.4	71.75	84.3125	83.8438
31.5	73.0625	85.4219	84.2188
31.6	74.2812	83.8594	82.8594
31.7	72.75	85.9844	84.4219
31.8	71.6875	84.5781	83.4531
31.9	73.875	84.7969	84.0156
32	73.3906	86.9531	83.2812
32.1	71.9219	84.7188	84.2344
32.2	74.4375	84.5156	83.625
32.3	73.0938	83.625	83
32.4	74.4375	85.6719	85.6094
32.5	74.2031	83.7344	84.2812
32.6	71.7812	84.25	83.6406
32.7	74.9219	85.2344	83.5469
32.8	73.6562	83.5312	83.1406
32.9	74.2344	85.4062	85.3906
33	75.4688	85.5	87.6562
33.1	72.1094	84.4844	84.1875
33.2	76.0469	85.5469	87.0156
33.3	74.4531	85.6719	82.0469
33.4	76.6719	85.0938	85.2812
33.5	76.2188	85.0312	87.0312
33.6	74.2188	85.4375	85.3438
33.7	74.8281	86.125	84.4844
33.8	75.5312	87.3906	84.3906
33.9	78.6875	85.1875	86.4062
34	75.5625	85.9219	86.2344
34.1	75.7188	86.4219	84.9844
34.2	76.4531	86.2344	86.6094
34.3	74.5312	84.7188	85.75
34.4	78.2812	86.0312	87.7344
34.5	76.9531	87.4375	84.9219
34.6	75.8125	87.9219	84.6406
34.7	79.0625	88.6875	86.3906
34.8	74.3906	85.2188	85.9062
34.9	79.2188	88.625	86.6094
35	75.5156	86.5781	85.9844

## Sheet: Fig.4d
Figure 4, Panel D													unit is pA
Superior				Middle				Inferior
ISR		ML218		ISR		ML218		ISR		ML218
−	+	−	+	−	+	−	+	−	+	−	+
-38.8793	-2.2356	-4.08053	0	-91.3683	-9.16238	-11.0219	0	-92.1415	0.894914	-14.0222	0
-79.5551	-4.26654	-15.5159	0	-87.7377	-7.0576	-6.51743	0	-85.1501	1.95527	-7.79537	0
-64.6921	-11.3168	-5.99549	0	-102.188	-2.81189	-11.0403	0	-122.024	-4.26532	-7.811	0
-86.1464	-8.17708	-7.78456	0	-102.4	-1.98009	-9.44862	0	-53.7711	1.91789	-3.59525	0
-53.322	-6.21415	-6.3744	0	-107.958	-5.84007	-13.8462	0	-65.3986	-5.17463	-0.123798	0
-84.7546	-8.65043	-2.41376	0
-63.849	-7.74357	-6.1851	0

## Sheet: Fig.4e
Figure 4, Panel E, Top					Figure 4, Panel E, Center					Figure 4, Panel E, Bottom
Time (ms)	Current (pA)				Time (ms)	Current (pA)				Time (ms)	Current (pA)
	Baseline	ISR	ISR+ML218			Baseline	ISR	ISR+ML218			Baseline	ISR	ISR+ML218
0	-2.26562	-0.5	-0.640625		0	-1.53125	-2.07812	-0.03125		0	-1.79688	-2.82812	-2.75
0.1	0.453125	-2.15625	-2.10938		0.1	-0.859375	0.15625	-1.54688		0.1	-1.42188	-1.65625	-2.40625
0.2	-2.07812	-2.25	-0.515625		0.2	-2.5625	-0.453125	-0.609375		0.2	-3.04688	-1.53125	-1.65625
0.3	-0.109375	-0.328125	-1.42188		0.3	-2.4375	-0.890625	-2.85938		0.3	-2.90625	0.375	-2.15625
0.4	0.421875	-1.70312	0.4375		0.4	1.28125	-0.71875	-2.25		0.4	-1.0625	-2.48438	-1.4375
0.5	-1.42188	-1.46875	-3.51562		0.5	0.515625	-2.84375	-1.92188		0.5	0.109375	-1.25	-1.59375
0.6	-0.109375	-3.78125	-2.01562		0.6	-3.51562	-0.828125	-0.71875		0.6	-0.828125	-1.51562	-3.09375
0.7	-0.109375	-0.96875	-0.015625		0.7	-1.15625	-0.34375	-2.0625		0.7	-2.57812	-1.6875	-0.296875
0.8	-1.15625	0.328125	-1.54688		0.8	-1.96875	-0.765625	-0.984375		0.8	-0.5	-0.796875	-2.5
0.9	-0.84375	-3.20312	-1.85938		0.9	-2.03125	-1.29688	-1.79688		0.9	-2.26562	-0.0625	-1.29688
1	0.765625	-2.32812	-0.40625		1	-0.46875	-2.42188	-0.9375		1	-1.28125	-2	-0.1875
1.1	-1.625	0.265625	-2.4375		1.1	0.140625	-0.015625	-1.39062		1.1	-2.15625	-1.82812	-0.59375
1.2	-1.07812	-0.03125	-0.765625		1.2	-1.23438	-1.10938	-0.265625		1.2	-4.28125	-1.29688	-0.984375
1.3	-1.13789	-1.38009	-1.4716		1.3	-0.923528	-1.58792	-1.43451		1.3	-1.45429	-1.75275	-1.47198
1.4	-1.05853	-1.14632	-1.4091		1.4	-0.882855	-1.56813	-1.2739		1.4	-1.14706	-1.61419	-1.52268
1.5	-0.883806	-1.1992	-1.43028		1.5	-0.851367	-1.47006	-1.41745		1.5	-1.29926	-1.47012	-1.53559
1.6	-0.866197	-1.43407	-1.32005		1.6	-0.59839	-1.47741	-1.23609		1.6	-1.16428	-1.65537	-1.52981
1.7	-0.951799	-1.70732	-1.3338		1.7	-0.604932	-1.32403	-1.40962		1.7	-1.24559	-1.49694	-1.63285
1.8	-1.23899	-1.43358	-1.30657		1.8	-0.592644	-1.2887	-1.73324		1.8	-1.31042	-1.43095	-1.62999
1.9	-1.07542	-1.47183	-1.22371		1.9	-0.543145	-1.16638	-1.78801		1.9	-1.18645	-1.53016	-1.69753
2	-0.907506	-1.36984	-1.23622		2	-0.740491	-1.16198	-1.84848		2	-1.27947	-1.25044	-1.67074
2.1	-0.890596	-1.28162	-1.43951		2.1	-0.974079	-1.0932	-1.75868		2.1	-1.33509	-1.26297	-1.63454
2.2	-0.904614	-1.36971	-1.511		2.2	-1.02159	-1.10316	-1.80001		2.2	-1.43308	-1.17928	-1.65608
2.3	-0.776888	-1.78567	-1.22717		2.3	-1.07025	-1.17107	-1.65485		2.3	-1.51761	-1.26417	-1.73346
2.4	-0.825763	-1.83784	-1.09021		2.4	-1.25481	-1.38742	-1.28583		2.4	-1.35006	-1.38534	-1.71253
2.5	-1.27146	-1.68448	-1.03635		2.5	-1.45513	-1.45759	-1.35323		2.5	-1.39599	-1.5346	-1.35941
2.6	-1.20561	-1.74353	-0.923893		2.6	-1.42437	-1.34616	-1.37696		2.6	-1.56011	-1.69237	-1.37922
2.7	-1.32935	-1.66126	-0.933655		2.7	-1.37532	-1.31521	-1.45958		2.7	-1.49204	-1.97447	-1.41184
2.8	-1.20428	-1.73108	-1.01212		2.8	-1.29731	-1.36617	-1.50951		2.8	-1.35465	-1.50322	-1.58818
2.9	-1.31809	-1.95472	-1.00796		2.9	-1.49455	-1.63529	-1.52346		2.9	-1.48609	-1.28027	-1.87104
3	-1.14927	-1.65051	-0.989015		3	-1.78385	-1.47928	-1.69733		3	-1.69576	-1.24175	-1.70475
3.1	-1.06797	-1.52882	-0.975633		3.1	-1.78087	-1.44936	-1.64329		3.1	-1.68	-1.47743	-1.74453
3.2	-1.29407	-1.43019	-0.990129		3.2	-1.77428	-1.61473	-1.70655		3.2	-1.57104	-1.3735	-1.55047
3.3	-1.17026	-1.24178	-0.918654		3.3	-1.78753	-1.23817	-1.56865		3.3	-1.57045	-1.27719	-1.47555
3.4	-1.14525	-1.47216	-0.928173		3.4	-1.65995	-1.26566	-1.83573		3.4	-1.34307	-1.06694	-1.36831
3.5	-0.924512	-1.26059	-1.13776		3.5	-1.71879	-1.33407	-1.61995		3.5	-1.25054	-1.04359	-1.46506
3.6	-0.900849	-1.21094	-1.3678		3.6	-1.52507	-1.31853	-1.43149		3.6	-1.4172	-1.32821	-1.42264
3.7	-0.988735	-1.29821	-1.52216		3.7	-1.71353	-1.40433	-1.42707		3.7	-1.36317	-1.12014	-1.61217
3.8	-0.817549	-1.05149	-1.38434		3.8	-1.56526	-1.35684	-1.32944		3.8	-1.22604	-1.23268	-1.53885
3.9	-0.786291	-1.09213	-1.15963		3.9	-1.47874	-1.46367	-1.45674		3.9	-1.2165	-1.18574	-1.43943
4	-0.971321	-1.2228	-1.25614		4	-1.51786	-1.3044	-1.65262		4	-1.40227	-1.0975	-1.44333
4.1	-1.13252	-1.21243	-1.28703		4.1	-1.46954	-1.07956	-1.61516		4.1	-1.6183	-1.08161	-1.64086
4.2	-1.22615	-1.32989	-0.986784		4.2	-1.22847	-1.33427	-1.46411		4.2	-1.75125	-1.19935	-1.59586
4.3	-1.19303	-1.76757	-1.06455		4.3	-1.22919	-1.46899	-1.43934		4.3	-1.94564	-1.23078	-1.55358
4.4	-0.930181	-1.62432	-1.08698		4.4	-1.05821	-1.57283	-1.41846		4.4	-1.74058	-1.284	-1.67737
4.5	-1.11254	-1.25173	-1.30233		4.5	-1.10444	-1.32975	-1.36362		4.5	-2.02172	-1.60096	-1.76284
4.6	-1.36195	-1.31185	-1.63669		4.6	-1.22618	-1.47227	-1.36579		4.6	-1.70471	-1.48566	-1.71785
4.7	-1.40238	-1.59953	-1.63515		4.7	-1.3054	-1.55369	-1.41181		4.7	-1.86952	-1.26479	-1.57762
4.8	-1.70399	-1.57822	-1.55921		4.8	-1.20526	-1.74167	-1.4091		4.8	-1.83935	-1.46181	-1.52849
4.9	-1.41944	-1.38407	-1.74129		4.9	-1.31167	-1.76128	-1.59304		4.9	-1.81308	-1.59767	-1.32962
5	-1.32981	-1.36201	-1.69496		5	-1.34903	-1.58598	-1.89396		5	-1.60844	-1.67034	-1.15577
5.1	-1.28176	-1.09532	-1.6045		5.1	-1.56857	-1.46678	-2.05715		5.1	-1.57187	-1.46839	-1.213
5.2	-1.33843	-1.17035	-1.36812		5.2	-1.40453	-1.17849	-1.86857		5.2	-1.27245	-1.66751	-1.26561
5.3	-1.38472	-1.25834	-1.2016		5.3	-1.35972	-1.15332	-1.64073		5.3	-1.20929	-1.51684	-1.22689
5.4	-1.33467	-1.05984	-1.11533		5.4	-1.27624	-0.857383	-1.43311		5.4	-1.25232	-1.58545	-1.53717
5.5	-1.35707	-0.996006	-1.22173		5.5	-1.30167	-1.1937	-1.17715		5.5	-1.2266	-1.47887	-1.52114
5.6	-1.27867	-1.14355	-1.11524		5.6	-1.34599	-1.52429	-0.978805		5.6	-1.17233	-1.4311	-1.56683
5.7	-1.07906	-1.23636	-1.07108		5.7	-1.30385	-1.58628	-0.798669		5.7	-0.931744	-1.64013	-1.63564
5.8	-1.24062	-1.2265	-1.25788		5.8	-1.22037	-1.65979	-0.977449		5.8	-1.1534	-1.48252	-1.42009
5.9	-1.24688	-1.44965	-1.2988		5.9	-1.16643	-1.27533	-1.2425		5.9	-1.23397	-1.55737	-1.27621
6	-1.1373	-1.37167	-1.36499		6	-1.22811	-1.04555	-1.21313		6	-1.31059	-1.49766	-1.08137
6.1	-1.11193	-1.26769	-1.44794		6.1	-1.22467	-1.0608	-1.30974		6.1	-1.23063	-1.39424	-1.15581
6.2	-0.957653	-1.53633	-1.51293		6.2	-1.02504	-0.953596	-1.06395		6.2	-1.42363	-1.22061	-1.49413
6.3	-1.22328	-1.59612	-1.53169		6.3	-1.09483	-1.05621	-1.12448		6.3	-1.36775	-1.14251	-1.44849
6.4	-1.61242	-1.59955	-1.60241		6.4	-1.01035	-1.09505	-1.25059		6.4	-1.42051	-1.06696	-1.5277
6.5	-1.41532	-1.87372	-1.60452		6.5	-1.29379	-1.33616	-1.40586		6.5	-1.41616	-1.04952	-1.4931
6.6	-1.33508	-1.62043	-1.65768		6.6	-1.46073	-1.18028	-1.68141		6.6	-1.34434	-1.17913	-1.30751
6.7	-1.2478	-1.60591	-1.55156		6.7	-1.58324	-1.27874	-1.70167		6.7	-1.24225	-1.27331	-1.34587
6.8	-1.43416	-1.36229	-1.31459		6.8	-1.38207	-1.31638	-1.80025		6.8	-1.22095	-1.30952	-1.32154
6.9	-1.38377	-1.49636	-1.35862		6.9	-1.29083	-1.11039	-1.64777		6.9	-1.24226	-1.28074	-1.2047
7	-1.33123	-1.24408	-1.49594		7	-1.29773	-1.28129	-1.56891		7	-1.30315	-1.11025	-1.27423
7.1	-1.16181	-1.12237	-1.25621		7.1	-1.35501	-1.20216	-1.60687		7.1	-1.33496	-1.0462	-1.4452
7.2	-1.3044	-1.13841	-1.16221		7.2	-1.47456	-1.31368	-1.56985		7.2	-1.27373	-1.02401	-1.49819
7.3	-1.11852	-1.21531	-1.16911		7.3	-1.63662	-1.50219	-1.61541		7.3	-1.11304	-1.04025	-1.45952
7.4	-1.30826	-1.1445	-1.19608		7.4	-1.6286	-1.47118	-1.4618		7.4	-1.21441	-1.29225	-1.48199
7.5	-1.38427	-1.07352	-1.34819		7.5	-1.5688	-1.52428	-1.40561		7.5	-1.16958	-1.46856	-1.43405
7.6	-1.4788	-0.976742	-1.40024		7.6	-1.78012	-1.45214	-1.47077		7.6	-1.14233	-1.4794	-1.52131
7.7	-1.49962	-1.16565	-1.55115		7.7	-1.61532	-1.54881	-1.40691		7.7	-1.13827	-1.42352	-1.56388
7.8	-1.3695	-1.04736	-1.63064		7.8	-1.61454	-1.27653	-1.21517		7.8	-1.29791	-1.50912	-1.7437
7.9	-1.38391	-1.20246	-1.70273		7.9	-1.9803	-1.26005	-1.15115		7.9	-1.10803	-1.28198	-1.82148
8	-1.48385	-1.28358	-1.3469		8	-1.82387	-1.24628	-1.25798		8	-1.21699	-1.31051	-1.88221
8.1	-1.36672	-1.11009	-1.34129		8.1	-1.67326	-1.33131	-1.25919		8.1	-1.28084	-1.22551	-1.61765
8.2	-1.43528	-1.38057	-1.3434		8.2	-1.63684	-1.37305	-1.07967		8.2	-1.63992	-1.20945	-1.51893
8.3	-1.28797	-1.41904	-1.35605		8.3	-1.4704	-1.14287	-0.96222		8.3	-1.3659	-1.22991	-1.62842
8.4	-1.37455	-1.50493	-1.27937		8.4	-1.47385	-1.27274	-1.06185		8.4	-1.39274	-0.91668	-1.5839
8.5	-1.41441	-1.34175	-1.3568		8.5	-1.44623	-1.23213	-1.08701		8.5	-1.54017	-1.03407	-1.26123
8.6	-1.16731	-1.2734	-1.59477		8.6	-1.34259	-1.33613	-1.33581		8.6	-1.4123	-1.13774	-1.29112
8.7	-1.08833	-1.4252	-1.51603		8.7	-1.04391	-1.45822	-1.42801		8.7	-1.19155	-1.18241	-1.47762
8.8	-1.2916	-1.42311	-1.47858		8.8	-0.838345	-1.34964	-1.71203		8.8	-1.0647	-1.26936	-1.35044
8.9	-1.18913	-1.50925	-1.3565		8.9	-0.834414	-1.34963	-1.73598		8.9	-1.04813	-1.27525	-1.63877
9	-1.12179	-1.37567	-1.56527		9	-0.889418	-1.24294	-1.78047		9	-1.13466	-1.4394	-1.70723
9.1	-1.42587	-1.23713	-1.45313		9.1	-0.992214	-1.3585	-1.5484		9.1	-0.93882	-1.19023	-1.4768
9.2	-1.23089	-1.20502	-1.40949		9.2	-1.07095	-1.21921	-1.55206		9.2	-1.1277	-1.12553	-1.2764
9.3	-1.39686	-1.37375	-1.24198		9.3	-1.50619	-1.35762	-1.41685		9.3	-1.02349	-1.17895	-1.44134
9.4	-1.46987	-1.42028	-1.24469		9.4	-1.44619	-1.25578	-1.51667		9.4	-1.0927	-1.17142	-1.318
9.5	-1.32794	-1.41511	-1.25592		9.5	-1.39573	-1.35955	-1.66897		9.5	-1.18072	-1.17288	-1.33375
9.6	-1.35084	-1.55642	-1.56698		9.6	-1.22465	-1.21419	-1.84043		9.6	-1.19963	-1.49165	-1.29249
9.7	-1.15608	-1.34245	-1.40628		9.7	-1.32226	-1.38139	-1.92307		9.7	-1.18635	-1.40573	-1.50702
9.8	-0.98766	-1.46198	-1.36877		9.8	-1.29204	-1.14493	-1.59779		9.8	-1.32267	-1.60365	-1.43191
9.9	-1.00331	-1.49915	-1.32522		9.9	-1.22595	-1.04904	-1.75084		9.9	-1.2364	-1.16245	-1.42285
10	-1.19546	-1.61956	-1.23972		10	-1.25174	-1.23702	-1.78244		10	-1.1895	-1.12143	-1.35817
10.1	-1.18124	-1.30932	-1.04986		10.1	-1.53155	-1.18258	-1.43798		10.1	-1.44145	-1.06635	-1.41281
10.2	-0.859505	-1.11426	-0.985741		10.2	-1.32167	-1.05418	-1.34236		10.2	-1.30728	-1.04696	-1.50736
10.3	-1.19026	-1.17892	-0.992799		10.3	-1.54727	-1.07689	-1.30004		10.3	-1.50948	-1.12985	-1.50583
10.4	-1.37584	-1.38044	-1.19302		10.4	-1.44095	-1.1988	-1.08132		10.4	-1.31934	-1.23574	-1.51325
10.5	-1.34776	-1.35366	-1.22792		10.5	-1.49232	-1.29568	-1.30234		10.5	-1.26027	-1.38247	-1.63048
10.6	-1.39157	-1.52783	-1.37584		10.6	-1.62236	-1.20152	-1.10743		10.6	-1.2963	-1.51028	-1.6018
10.7	-1.43486	-1.54274	-1.55352		10.7	-1.31506	-1.07176	-1.11654		10.7	-1.3402	-1.41524	-1.38696
10.8	-1.12754	-1.6235	-1.6647		10.8	-1.43612	-0.964733	-1.25158		10.8	-1.27944	-1.62624	-1.43256
10.9	-1.18225	-1.45911	-1.44138		10.9	-1.37675	-0.840116	-0.937881		10.9	-1.35844	-1.71036	-1.58954
11	-1.25911	-1.1829	-1.14271		11	-1.4229	-0.97221	-1.01541		11	-1.40751	-1.36451	-1.65895
11.1	-1.34114	-1.4065	-1.23038		11.1	-1.46703	-1.20683	-1.29817		11.1	-1.14864	-1.16957	-1.68826
11.2	-1.26172	-1.41084	-1.2089		11.2	-1.18929	-1.34914	-1.52284		11.2	-1.14982	-1.04457	-1.65338
11.3	-1.58056	-1.47316	-1.21296		11.3	-1.35177	-1.67793	-1.3188		11.3	-1.17872	-1.02835	-1.50288
11.4	-1.53561	-1.77385	-1.59225		11.4	-1.50187	-1.86279	-1.51276		11.4	-1.13893	-0.950448	-1.19766
11.5	-1.34902	-1.42146	-1.25811		11.5	-1.37014	-1.79372	-1.28633		11.5	-1.12296	-1.04759	-1.23702
11.6	-1.34305	-0.967274	-1.39859		11.6	-1.28709	-1.79004	-1.25274		11.6	-1.27346	-1.08505	-1.20886
11.7	-1.35287	-0.999485	-1.21486		11.7	-1.12424	-1.865	-1.10944		11.7	-1.28764	-1.23391	-1.29685
11.8	-1.41191	-1.01797	-1.27604		11.8	-1.32807	-1.64349	-1.08951		11.8	-1.1891	-1.27589	-1.3018
11.9	-1.5565	-1.16358	-1.43648		11.9	-1.21911	-1.33259	-1.2223		11.9	-1.1444	-1.4269	-1.2312
12	-1.62275	-0.88096	-1.40972		12	-1.14266	-1.37867	-1.45343		12	-1.22144	-1.40916	-1.40265
12.1	-1.5986	-1.15393	-1.58459		12.1	-1.35043	-1.40619	-1.69317		12.1	-1.41205	-1.38553	-1.3845
12.2	-1.42143	-1.01701	-1.94899		12.2	-1.33026	-1.22584	-1.90655		12.2	-1.48272	-1.21009	-1.25339
12.3	-1.19771	-1.29092	-1.9063		12.3	-1.22124	-1.06934	-2.06704		12.3	-1.48564	-1.27041	-1.32507
12.4	-0.862321	-1.0992	-1.73726		12.4	-1.42786	-1.16675	-1.8683		12.4	-1.37216	-1.58141	-1.31306
12.5	-1.08379	-1.22209	-1.5805		12.5	-1.2236	-1.18807	-1.62998		12.5	-1.26557	-1.58817	-1.38395
12.6	-0.99359	-1.03199	-1.33021		12.6	-1.60931	-1.19548	-1.61027		12.6	-1.46375	-1.63411	-1.47609
12.7	-0.751045	-1.12197	-1.13449		12.7	-1.69104	-1.23637	-1.69563		12.7	-1.35414	-1.55219	-1.27962
12.8	-0.962345	-1.40967	-1.51613		12.8	-1.76035	-0.975118	-1.5895		12.8	-1.39866	-1.49749	-1.19563
12.9	-1.15776	-1.45252	-1.57413		12.9	-1.77941	-0.694919	-1.6251		12.9	-1.32835	-1.20202	-0.99768
13	-1.02103	-1.56825	-1.64832		13	-1.40729	-1.04887	-1.60258		13	-0.998061	-1.25215	-0.810388
13.1	-1.07294	-1.37298	-1.70698		13.1	-1.55561	-0.764222	-1.52946		13.1	-1.10588	-1.37517	-0.904666
13.2	-0.966608	-1.60812	-1.50051		13.2	-1.61757	-1.11278	-1.59192		13.2	-1.1593	-1.58634	-1.04644
13.3	-0.913135	-1.67906	-1.58222		13.3	-1.63287	-0.944059	-1.9843		13.3	-1.46463	-1.39391	-1.15319
13.4	-0.675933	-1.53622	-1.67179		13.4	-1.72773	-1.23319	-1.50651		13.4	-1.70249	-1.31702	-1.19623
13.5	-0.772473	-1.43094	-1.56976		13.5	-1.72032	-1.34372	-1.58517		13.5	-1.79255	-1.36249	-1.22901
13.6	-1.1044	-1.84834	-1.52519		13.6	-1.4922	-1.40152	-1.44049		13.6	-1.87274	-1.4386	-1.14989
13.7	-1.17976	-1.68375	-1.4019		13.7	-1.53698	-1.44272	-1.55018		13.7	-1.81906	-1.38668	-1.27158
13.8	-1.11173	-1.47739	-1.42527		13.8	-1.456	-1.23314	-1.45476		13.8	-1.64684	-1.58636	-0.944277
13.9	-1.16299	-1.53712	-1.47796		13.9	-1.30571	-1.1858	-1.42106		13.9	-1.70926	-1.73658	-1.14072
14	-1.38669	-1.52246	-1.35696		14	-1.11268	-1.36659	-1.50576		14	-1.53315	-1.60012	-1.39166
14.1	-1.44905	-1.5038	-1.4224		14.1	-1.23065	-1.39458	-1.61385		14.1	-1.15386	-1.55837	-1.48366
14.2	-1.4316	-1.48199	-1.30784		14.2	-1.29648	-1.40753	-1.56267		14.2	-1.07511	-1.29907	-1.53033
14.3	-1.31171	-1.51446	-1.21318		14.3	-1.48608	-1.25299	-1.36161		14.3	-1.32547	-1.36166	-1.60996
14.4	-1.08878	-1.54097	-1.29785		14.4	-1.66615	-1.16526	-1.50849		14.4	-1.37591	-1.1181	-1.61228
14.5	-1.02801	-1.37789	-1.23271		14.5	-1.51713	-1.14886	-1.33613		14.5	-1.32485	-1.23546	-1.43979
14.6	-1.17739	-1.20979	-1.24324		14.6	-1.68322	-1.31034	-1.21407		14.6	-1.32897	-1.43461	-1.36874
14.7	-1.15278	-1.38728	-1.24628		14.7	-1.68368	-1.3805	-1.2543		14.7	-1.13074	-1.46472	-1.59762
14.8	-1.15533	-1.56343	-1.5641		14.8	-1.54492	-1.05737	-1.36358		14.8	-1.42074	-1.43407	-1.52734
14.9	-1.02863	-1.58168	-1.26996		14.9	-1.16658	-0.989486	-1.43519		14.9	-1.32966	-1.57771	-1.8191
15	-0.986788	-1.63166	-1.45447		15	-1.24246	-1.17533	-1.18404		15	-1.19487	-1.50912	-1.84986
15.1	-0.855044	-1.57458	-1.26343		15.1	-1.40624	-1.27409	-1.24282		15.1	-1.29915	-1.50865	-1.7074
15.2	-0.833813	-1.46227	-1.5783		15.2	-1.33774	-1.24957	-1.30593		15.2	-1.23717	-1.60656	-1.61121
15.3	-0.971539	-1.51317	-1.68019		15.3	-1.38791	-1.34731	-1.3232		15.3	-1.26728	-1.53715	-1.44022
15.4	-0.808068	-1.37961	-1.71471		15.4	-1.54322	-1.47978	-1.50645		15.4	-1.29789	-1.48997	-1.33458
15.5	-0.703227	-1.52083	-1.78014		15.5	-1.56259	-1.62967	-1.49227		15.5	-1.21209	-1.62274	-1.64179
15.6	-0.744851	-1.51082	-1.59917		15.6	-1.614	-1.46754	-1.62937		15.6	-1.18573	-1.69692	-1.58945
15.7	-0.9457	-1.26501	-1.75535		15.7	-1.5027	-1.56553	-1.48884		15.7	-1.26746	-1.57559	-1.31541
15.8	-0.848568	-0.966736	-1.45718		15.8	-1.46135	-1.41927	-1.3353		15.8	-1.38222	-1.41615	-1.51657
15.9	-1.02433	-0.94108	-1.24655		15.9	-1.39797	-1.22083	-1.38085		15.9	-1.50838	-1.64281	-1.47845
16	-0.980491	-0.771745	-1.1231		16	-1.39268	-1.2413	-1.31777		16	-1.32617	-1.58151	-1.3537
16.1	-0.901246	-1.0051	-1.23579		16.1	-1.22915	-1.17261	-1.46674		16.1	-1.35927	-1.57342	-1.43281
16.2	-1.04026	-1.07165	-1.24488		16.2	-1.31967	-0.981281	-1.46791		16.2	-1.17845	-1.3632	-1.43218
16.3	-0.806658	-1.18069	-1.44425		16.3	-1.38869	-1.06195	-1.46632		16.3	-1.11142	-1.5943	-1.41053
16.4	-0.913869	-1.15516	-1.49948		16.4	-1.51718	-1.06638	-1.25764		16.4	-1.03356	-1.60271	-1.43293
16.5	-1.09222	-1.23051	-1.43318		16.5	-1.50851	-1.18048	-1.39216		16.5	-1.0799	-1.43616	-1.39844
16.6	-1.16416	-1.12183	-1.68814		16.6	-1.63272	-1.50129	-1.2525		16.6	-1.12457	-1.61851	-1.47085
16.7	-0.987095	-1.12037	-1.60318		16.7	-1.68216	-1.44528	-1.05198		16.7	-1.06298	-1.64659	-1.5857
16.8	-1.17543	-1.11135	-1.52276		16.8	-1.87921	-1.52304	-1.12438		16.8	-1.14701	-1.48801	-1.59828
16.9	-1.2501	-1.06972	-1.21242		16.9	-1.93404	-1.56043	-0.995264		16.9	-1.38668	-1.28042	-1.6142
17	-1.35598	-0.952513	-1.17973		17	-1.59259	-1.63623	-0.867302		17	-1.7089	-1.25151	-1.40209
17.1	-1.26991	-0.858055	-1.50468		17.1	-1.43246	-1.51337	-1.18256		17.1	-1.60925	-1.34982	-1.38868
17.2	-1.21406	-1.07145	-1.61853		17.2	-1.43808	-1.55033	-1.08067		17.2	-1.51233	-1.45556	-1.45642
17.3	-1.16622	-1.08619	-1.284		17.3	-1.41609	-1.47886	-0.921173		17.3	-1.15533	-1.44719	-1.39235
17.4	-1.26389	-1.0844	-1.32886		17.4	-1.38911	-1.25592	-0.966227		17.4	-1.01456	-1.18849	-1.30825
17.5	-1.3807	-1.19266	-1.31058		17.5	-1.31327	-1.54905	-0.949972		17.5	-1.18866	-1.27245	-1.49614
17.6	-1.16516	-1.31449	-1.59642		17.6	-1.33495	-1.53498	-1.1372		17.6	-1.00141	-1.42649	-1.5419
17.7	-1.04861	-1.40136	-1.73247		17.7	-1.18865	-1.60545	-1.26341		17.7	-1.05278	-1.25761	-1.47773
17.8	-1.2611	-1.68641	-1.71187		17.8	-1.58486	-1.2148	-1.27756		17.8	-1.12213	-1.63413	-1.61889
17.9	-1.20942	-1.64162	-1.56255		17.9	-1.36525	-1.24215	-1.24346		17.9	-1.21891	-1.36734	-1.78482
18	-0.97658	-1.41508	-1.48696		18	-1.55294	-1.39203	-1.30576		18	-1.58731	-1.30017	-1.71827
18.1	-1.11527	-1.45498	-1.30719		18.1	-1.50924	-1.33443	-1.27087		18.1	-1.32626	-1.35201	-1.28867
18.2	-0.892574	-1.48585	-1.27093		18.2	-1.59963	-1.65761	-1.2589		18.2	-1.34077	-1.26506	-1.23543
18.3	-0.997822	-1.18595	-1.27197		18.3	-1.47742	-1.36718	-1.27442		18.3	-1.33617	-1.27965	-1.08601
18.4	-1.06084	-1.13088	-1.19727		18.4	-1.29455	-1.62068	-1.14266		18.4	-1.2649	-1.19003	-0.98742
18.5	-1.10943	-1.32925	-1.2624		18.5	-1.43131	-1.46205	-1.09657		18.5	-1.2105	-1.38374	-1.00309
18.6	-0.892662	-1.12097	-1.34191		18.6	-1.23957	-1.55028	-0.898087		18.6	-1.42875	-1.39801	-1.16773
18.7	-0.794122	-1.23949	-1.36375		18.7	-1.06607	-1.28117	-0.97833		18.7	-1.30238	-1.47292	-1.16301
18.8	-0.750893	-1.22645	-1.5656		18.8	-1.26739	-1.2846	-0.829156		18.8	-1.32613	-1.37676	-1.23009
18.9	-0.991414	-1.18044	-1.70764		18.9	-1.51297	-1.07451	-0.855417		18.9	-1.3019	-1.27184	-1.09685
19	-0.850943	-1.16698	-1.55197		19	-1.55397	-1.13236	-1.13414		19	-1.42684	-1.01517	-1.07786
19.1	-0.401567	-0.827651	-1.1469		19.1	-1.04605	-0.997838	-1.00631		19.1	-1.46033	-0.593513	-1.02204
19.2	1.07096	0.232757	0.489478		19.2	0.173326	0.276318	-0.132118		19.2	-0.173163	0.615093	0.0845322
19.3	5.33193	4.68246	4.75552		19.3	3.72787	3.78688	3.46215		19.3	3.20274	3.71889	3.15719
19.4	16.8778	15.9198	15.9908		19.4	13.0584	13.2724	12.6847		19.4	11.3543	11.8431	11.2969
19.5	43.2746	41.444	41.8112		19.5	34.05	33.8344	32.9884		19.5	29.5085	29.7407	28.8934
19.6	94.9841	91.9362	92.4254		19.6	74.6917	73.4654	72.4135		19.6	64.1278	63.4356	62.0135
19.7	182.305	176.856	176.869		19.7	141.559	138.642	136.558		19.7	120.187	117.996	115.699
19.8	306.921	297.975	297.658		19.8	235.468	229.213	226.602		19.8	197.336	193.575	189.494
19.9	456.211	442.342	441.893		19.9	345.501	334.836	331.317		19.9	286.29	280.214	273.979
20	601.821	582.802	581.993		20	450.105	435.23	429.985		20	369.011	360.189	352.144
20.1	620.635	596.539	595.445		20.1	436.013	417.389	410.963		20.1	338.236	327.469	318.715
20.2	409.628	390.576	390.146		20.2	286.968	273.378	271.117		20.2	223.709	214.289	210.912
20.3	295.866	283.421	284.532		20.3	209.401	199.19	198.404		20.3	163.761	156.674	154.475
20.4	220.584	213.953	214.927		20.4	157.771	150.45	150.167		20.4	123.511	118.26	116.476
20.5	163.504	163.397	164.361		20.5	119.829	115.014	114.639		20.5	94.0071	90.0497	88.4782
20.6	118.128	124.626	125.624		20.6	90.8927	88.0778	87.4392		20.6	71.6986	68.8196	67.1365
20.7	81.3739	95.0659	95.7376		20.7	68.4218	67.3842	66.9459		20.7	54.7965	52.5792	50.8134
20.8	52.3099	72.6153	73.8737		20.8	51.5578	52.1422	51.5069		20.8	42.0353	40.4127	39.0764
20.9	29.5787	55.9616	58.0154		20.9	39.4786	41.0974	40.3547		20.9	32.7594	31.5342	30.1466
21	11.6394	43.4434	45.845		21	30.3312	32.9148	32.359		21	26.2072	25.4512	23.7385
21.1	-2.3083	34.5343	37.2005		21.1	23.5967	26.5658	26.2151		21.1	21.2474	20.7929	19.3179
21.2	-13.2244	27.9752	30.4959		21.2	18.0879	22.1867	21.9055		21.2	17.5129	17.1899	16.3583
21.3	-21.908	22.9036	25.8447		21.3	14.2034	18.9585	18.7352		21.3	14.7691	14.7017	13.9418
21.4	-29.0513	19.4335	22.4354		21.4	10.7809	16.6661	16.279		21.4	12.5092	12.6406	12.5648
21.5	-34.1971	16.5151	19.9064		21.5	8.20025	14.9646	14.4919		21.5	11.0088	11.4379	11.2165
21.6	-38.2792	14.1219	18.1895		21.6	6.10754	13.5587	13.4569		21.6	10.0457	10.5463	10.1822
21.7	-41.6494	12.5286	16.789		21.7	4.35912	12.5661	12.5178		21.7	9.05756	9.65807	9.36211
21.8	-44.4346	10.8703	15.839		21.8	3.16449	11.8886	11.6694		21.8	8.55785	9.18121	8.58399
21.9	-46.3968	10.1352	14.9547		21.9	2.43338	11.2418	10.9659		21.9	8.17196	8.7381	8.18613
22	-48.1141	9.37871	14.3657		22	1.71589	10.7239	10.5244		22	7.86314	8.57213	7.88731
22.1	-49.1638	8.51257	13.8726		22.1	1.40997	10.6087	10.2579		22.1	7.56762	8.26751	7.5757
22.2	-50.1321	7.95543	13.5578		22.2	0.843314	10.154	10.1746		22.2	7.2403	8.22232	7.33726
22.3	-51.0387	7.56109	13.1632		22.3	0.137716	9.92154	9.93388		22.3	7.05957	8.18699	7.25986
22.4	-51.634	7.10614	12.6125		22.4	-0.300163	9.81681	9.8688		22.4	6.63843	8.00843	6.94705
22.5	-51.9457	6.75749	12.4723		22.5	-0.58683	9.81055	9.90921		22.5	6.55083	7.79514	6.8549
22.6	-52.0321	6.30443	12.2634		22.6	-0.965626	9.72802	9.73071		22.6	6.50594	7.62685	6.71495
22.7	-52.6643	6.0336	12.0157		22.7	-1.34614	9.61941	9.25223		22.7	6.1917	7.60842	6.76725
22.8	-52.644	6.00493	11.8954		22.8	-1.91406	9.05182	9.14259		22.8	6.10676	7.24252	6.86167
22.9	-53.064	5.77756	11.6096		22.9	-2.14083	8.72531	8.89618		22.9	6.10664	7.42113	6.80507
23	-52.9672	5.5981	11.4543		23	-2.53967	8.79725	9.05124		23	5.87145	7.17164	6.80864
23.1	-53.1231	5.04979	11.2038		23.1	-3.06141	8.69376	8.88134		23.1	6.0373	7.11793	6.7741
23.2	-53.2305	5.10465	10.9524		23.2	-3.28857	8.37146	9.00598		23.2	5.83305	7.1352	6.56021
23.3	-53.1907	5.02522	10.7719		23.3	-3.56774	8.01242	8.9902		23.3	5.75538	7.0634	6.77825
23.4	-53.3948	4.92323	10.4531		23.4	-3.59899	7.74126	8.83204		23.4	5.87703	6.937	6.78569
23.5	-53.7345	4.59276	10.4485		23.5	-3.81372	7.48256	8.69318		23.5	5.86874	6.84271	6.61583
23.6	-53.8327	4.33057	10.1731		23.6	-4.05061	7.83863	8.23047		23.6	5.54246	6.70367	6.78324
23.7	-54.2792	4.14716	10.0508		23.7	-4.13238	7.56684	8.10673		23.7	5.51734	6.80157	6.49799
23.8	-54.0865	3.86317	9.98841		23.8	-4.30067	7.43244	8.05476		23.8	5.12866	6.52545	6.32219
23.9	-54.2037	3.9635	9.94193		23.9	-4.48334	7.32035	8.07624		23.9	5.30732	6.23513	6.26616
24	-54.2083	4.02751	9.91676		24	-4.69458	7.25508	8.11574		24	5.18614	6.07824	6.30501
24.1	-54.1601	3.72871	9.9136		24.1	-5.06501	7.2995	7.86959		24.1	5.21916	6.02474	5.92207
24.2	-54.3591	3.33075	9.70095		24.2	-5.21562	7.22776	8.01784		24.2	5.39437	5.92953	5.8526
24.3	-54.4191	3.09775	9.67154		24.3	-5.19255	7.29238	7.77054		24.3	5.16499	6.05979	5.80421
24.4	-54.8214	2.91908	9.44704		24.4	-5.44568	7.25368	7.52145		24.4	4.87718	5.80642	5.67219
24.5	-55.2025	2.84797	9.27313		24.5	-5.29158	7.14896	7.38409		24.5	4.88917	5.96083	5.9114
24.6	-55.3083	2.63722	9.12298		24.6	-5.45057	7.28785	7.34475		24.6	4.59532	6.00146	5.93492
24.7	-55.3468	2.53491	9.20428		24.7	-5.25789	7.11082	7.16188		24.7	4.74179	5.99968	5.68243
24.8	-55.2923	2.63548	8.72803		24.8	-5.34479	7.108	7.37865		24.8	4.79546	6.30713	5.7233
24.9	-55.4085	2.42457	8.61758		24.9	-5.62094	7.01372	7.2991		24.9	4.69851	6.33879	5.72679
25	-55.6996	2.45806	8.52813		25	-5.58677	6.97022	7.25495		25	4.97218	6.31429	5.8173
25.1	-55.7686	2.45282	8.55571		25.1	-5.65661	7.02087	7.23822		25.1	4.83688	6.18597	5.71445
25.2	-55.7588	2.22303	8.19967		25.2	-5.69328	6.87949	6.98058		25.2	4.69982	6.17173	5.36354
25.3	-55.7621	2.15015	8.61103		25.3	-5.62413	6.7315	6.86975		25.3	4.63684	6.26372	5.17159
25.4	-55.5868	1.92617	8.39412		25.4	-5.59015	6.76611	6.83544		25.4	4.68361	6.16962	5.14924
25.5	-55.6437	1.80883	8.40808		25.5	-5.25728	6.51236	6.93804		25.5	4.80196	5.73957	5.22973
25.6	-55.6822	1.87683	8.5107		25.6	-5.50585	6.14199	6.96295		25.6	4.87739	5.48217	4.845
25.7	-55.7204	1.99284	8.42033		25.7	-5.47279	6.30481	6.74685		25.7	4.60682	5.28744	5.02992
25.8	-55.8002	1.71399	8.57275		25.8	-5.49087	6.15792	6.70083		25.8	4.80207	5.06737	5.23101
25.9	-55.9742	1.71434	8.6857		25.9	-5.97859	6.10755	6.73381		25.9	4.72904	5.33306	5.41985
26	-56.1902	1.63432	8.46729		26	-6.53254	6.01223	6.29241		26	4.70076	5.11909	5.50236
26.1	-56.471	1.543	8.44396		26.1	-6.71137	6.12596	6.07802		26.1	4.50628	5.11685	5.04129
26.2	-56.1248	1.7764	8.20867		26.2	-6.76906	5.81862	6.10855		26.2	4.40214	5.31347	4.83824
26.3	-55.9137	1.77243	8.18043		26.3	-6.76037	5.94841	6.24454		26.3	4.2838	5.6419	4.89645
26.4	-55.8254	1.7875	8.14684		26.4	-6.65592	6.24579	6.19651		26.4	4.49044	5.68108	4.81612
26.5	-55.5113	1.64193	8.13263		26.5	-6.78636	5.94159	6.36748		26.5	4.26593	5.69152	4.69593
26.6	-55.3579	1.43771	8.21811		26.6	-6.61082	5.62524	6.21122		26.6	4.18586	5.41389	4.78275
26.7	-55.2335	1.37485	8.24534		26.7	-6.4361	5.81335	6.28072		26.7	4.33362	5.41292	4.9164
26.8	-55.1858	1.27857	8.14538		26.8	-6.34757	5.84394	6.42233		26.8	4.04917	5.40665	4.74913
26.9	-55.4541	1.40197	7.93406		26.9	-6.5113	5.94836	6.01212		26.9	3.89551	5.36806	4.70394
27	-55.8129	1.31953	7.59694		27	-6.39098	6.11985	5.88669		27	4.18879	5.23907	4.60841
27.1	-55.5258	1.24947	7.78614		27.1	-6.32055	6.19109	6.02923		27.1	4.2553	4.89762	4.96258
27.2	-55.054	1.1727	7.71942		27.2	-6.47493	6.04504	6.11961		27.2	4.28724	5.01548	4.85517
27.3	-55.0168	1.18757	7.39096		27.3	-6.77977	5.76589	5.93597		27.3	4.5738	5.03535	4.89693
27.4	-55.0546	0.985832	7.16599		27.4	-6.72351	5.69086	5.88881		27.4	4.41609	5.36317	4.90725
27.5	-55.0056	1.02716	7.24721		27.5	-6.65879	5.55694	5.83638		27.5	4.48501	5.44215	4.97992
27.6	-55.1535	1.02283	7.28194		27.6	-6.65115	5.45454	6.10022		27.6	4.0938	5.41424	4.79768
27.7	-55.023	0.972906	7.36241		27.7	-6.71308	5.46564	6.22308		27.7	4.14848	5.24643	4.92713
27.8	-54.7957	0.955001	7.2553		27.8	-6.69862	5.50817	6.38413		27.8	3.86245	5.15394	4.64839
27.9	-55.062	0.593241	7.4824		27.9	-6.49501	5.61763	6.26521		27.9	3.82353	5.25277	4.83284
28	-54.9242	0.510166	7.44806		28	-6.45478	5.29798	6.27685		28	3.95755	5.20093	4.99208
28.1	-55.0292	0.649201	7.54301		28.1	-6.3606	5.11855	6.12375		28.1	3.94594	5.30035	4.87315
28.2	-55.3149	0.496637	7.35996		28.2	-6.43954	5.01787	6.15941		28.2	3.97879	5.27315	4.65024
28.3	-55.2214	0.859559	6.93977		28.3	-6.45428	5.4004	6.27533		28.3	4.00855	5.1063	4.52227
28.4	-55.1907	0.874724	6.75696		28.4	-6.64219	5.3532	6.02813		28.4	4.15364	4.98387	4.34251
28.5	-55.3263	0.973397	6.64433		28.5	-6.48035	5.04306	5.77046		28.5	4.1082	4.98094	4.23432
28.6	-55.3585	1.04613	6.52761		28.6	-6.61438	5.11883	5.66049		28.6	3.80673	5.09545	4.33481
28.7	-55.6933	0.889334	6.50576		28.7	-6.76651	5.12586	5.62273		28.7	3.62287	4.76679	4.22734
28.8	-55.5926	0.821019	6.60005		28.8	-6.83378	5.03727	5.83797		28.8	3.6857	4.60675	4.15448
28.9	-55.6914	0.915994	6.56557		28.9	-6.83244	4.89218	5.64107		28.9	3.51983	4.80507	4.28774
29	-55.2353	0.917156	6.70065		29	-6.82857	5.10076	5.59305		29	3.40214	4.64074	4.22367
29.1	-54.9864	1.02785	6.74013		29.1	-6.80534	5.33665	5.38247		29.1	3.3405	4.82366	4.19963
29.2	-54.8894	0.930011	6.72685		29.2	-6.71582	5.33225	5.34907		29.2	3.62944	4.99695	4.15216
29.3	-54.7433	0.793448	6.49644		29.3	-6.83101	5.34799	5.53755		29.3	3.60393	4.85206	4.20846
29.4	-55.0509	0.659292	6.48797		29.4	-6.78279	5.56501	5.50037		29.4	3.67765	4.90124	4.06805
29.5	-55.2372	0.670312	6.52922		29.5	-6.98619	5.6613	5.44776		29.5	3.65234	4.65969	3.97051
29.6	-55.5316	0.860734	6.87738		29.6	-7.10519	5.44366	5.31004		29.6	3.74977	4.66133	4.13547
29.7	-55.7967	0.856744	6.9393		29.7	-7.15732	5.48042	5.43192		29.7	3.98246	4.60567	4.23731
29.8	-55.5871	0.81239	6.79506		29.8	-7.5372	5.24079	5.24077		29.8	3.74805	4.52876	4.44404
29.9	-55.4096	0.902386	6.9356		29.9	-7.7721	5.10551	5.3309		29.9	3.75045	4.45841	4.44472
30	-55.3497	0.922978	6.90979		30	-7.65827	5.09239	5.64951		30	3.56947	4.59823	4.50833
30.1	-55.3488	0.862594	6.82038		30.1	-7.72203	5.10287	5.55068		30.1	3.64972	4.70612	4.30563
30.2	-55.079	1.06352	6.68748		30.2	-7.38015	5.14779	5.39165		30.2	3.54193	4.66804	4.32198
30.3	-54.874	1.12873	6.51472		30.3	-7.34715	4.99328	5.56874		30.3	3.66724	4.65045	4.1668
30.4	-55.1326	0.867999	6.60783		30.4	-7.23034	5.14285	5.7028		30.4	3.7431	4.59148	4.25334
30.5	-55.3	0.440543	6.52406		30.5	-7.09321	5.10457	5.59294		30.5	3.71014	4.57966	4.08867
30.6	-55.1357	0.376155	6.38473		30.6	-7.21466	5.05855	5.56677		30.6	3.94484	4.7232	4.04283
30.7	-55.037	0.511255	6.35304		30.7	-7.51542	5.09055	5.4265		30.7	3.79931	4.96817	3.92965
30.8	-55.0009	0.623257	6.33548		30.8	-7.35072	4.97912	5.47695		30.8	3.83271	4.91605	3.90869
30.9	-54.8733	0.800449	6.39574		30.9	-7.42531	5.13048	5.60044		30.9	3.89495	5.10816	3.90091
31	-54.8086	0.763404	6.22465		31	-7.26972	5.11539	5.43407		31	3.67488	4.99163	4.07382
31.1	-54.3697	0.796231	6.37106		31.1	-7.10987	5.30172	5.40752		31.1	3.59203	4.61909	4.10455
31.2	-54.3937	0.639706	6.28095		31.2	-7.02944	5.26712	5.23705		31.2	3.61922	4.77763	3.9977
31.3	-54.5823	0.516574	6.54515		31.3	-7.00788	4.98853	5.09607		31.3	3.38832	4.80858	3.94784
31.4	-54.5231	0.476093	6.50355		31.4	-7.14318	4.86857	5.23128		31.4	3.12797	4.86927	3.99972
31.5	-54.6049	0.62541	6.64356		31.5	-7.26384	4.94153	5.05853		31.5	3.14714	4.79026	3.89856
31.6	-54.4741	0.646303	6.69612		31.6	-7.514	4.91319	4.9924		31.6	3.27527	4.90326	3.87471
31.7	-54.6258	0.363241	6.47659		31.7	-7.48288	5.17254	4.98043		31.7	3.11631	4.75511	4.07771
31.8	-54.5669	0.598539	6.41296		31.8	-7.67453	5.18116	5.05613		31.8	3.11689	4.84165	4.33956
31.9	-54.3673	0.613977	6.42807		31.9	-7.72242	5.08483	5.3902		31.9	3.39446	4.70828	4.19578
32	-54.4351	0.710067	6.39175		32	-7.97125	5.06276	5.329		32	3.20613	4.60762	4.36487
32.1	-53.9358	0.555758	6.63166		32.1	-8.03642	5.09228	5.15538		32.1	3.30795	4.4088	4.32827
32.2	-53.7689	0.695116	6.59799		32.2	-8.12349	4.85586	4.91765		32.2	3.45994	4.47404	4.45174
32.3	-53.7543	0.558605	6.51879		32.3	-7.82203	5.165	4.80985		32.3	3.51839	4.29088	4.43756
32.4	-53.5894	0.692132	6.55255		32.4	-7.83825	4.99228	4.88544		32.4	3.61542	4.56272	4.41238
32.5	-53.9101	0.742984	6.25251		32.5	-7.46781	4.9428	4.90113		32.5	3.35233	4.52853	4.36708
32.6	-54.1614	0.42939	6.36449		32.6	-7.47556	4.60825	4.96128		32.6	3.25602	4.51589	4.19722
32.7	-54.3169	0.386669	6.48877		32.7	-7.83873	4.53889	4.99482		32.7	3.45437	4.56489	4.04241
32.8	-54.0294	0.395432	6.25599		32.8	-7.83602	4.47379	5.10883		32.8	3.43762	4.70458	3.97094
32.9	-54.0737	0.369187	6.04806		32.9	-8.02472	4.19221	5.01875		32.9	3.37654	4.7705	3.81526
33	-53.9613	0.41449	6.0446		33	-8.22282	4.10039	4.96221		33	2.97074	4.70967	3.61442
33.1	-53.909	0.432139	6.30761		33.1	-7.96901	4.2437	5.17167		33.1	2.69546	4.31285	3.69244
33.2	-53.8671	0.651383	6.4123		33.2	-7.83665	4.37137	5.12784		33.2	3.0248	4.33063	3.74601
33.3	-53.7285	0.583692	6.1911		33.3	-7.80528	4.35841	5.21244		33.3	2.9271	4.2401	3.82061
33.4	-53.7139	0.470871	6.20655		33.4	-8.11445	4.23381	5.40977		33.4	2.68646	4.343	4.09614
33.5	-53.5502	0.530228	6.09305		33.5	-8.10788	4.39905	5.29997		33.5	3.02816	4.06544	3.80771
33.6	-53.2682	0.461897	6.08734		33.6	-7.95955	4.51922	5.13186		33.6	3.11721	4.07565	3.93227
33.7	-53.0483	0.548413	6.35577		33.7	-8.15324	4.48476	5.07852		33.7	3.41941	4.22912	3.96361
33.8	-53.075	0.278881	6.4335		33.8	-8.23251	4.5803	4.87801		33.8	3.28771	4.21622	4.06865
33.9	-53.2177	0.499594	6.34404		33.9	-7.98377	4.59247	5.1733		33.9	3.45049	4.46089	3.79115
34	-53.5364	0.565981	6.67169		34	-7.98448	4.44497	5.23634		34	3.51749	4.69179	3.70115
34.1	-53.5992	0.590699	6.68069		34.1	-8.14313	4.46574	4.96213		34.1	3.50411	4.70827	3.65326
34.2	-53.8029	0.537688	6.85391		34.2	-8.15065	4.49032	5.15433		34.2	3.16717	4.57663	3.5788
34.3	-53.7706	0.71937	6.58714		34.3	-8.26623	4.63895	5.22924		34.3	3.01895	4.3995	3.75528
34.4	-53.6167	0.892269	6.40668		34.4	-8.23133	4.57221	5.26897		34.4	3.28152	4.41534	3.97351
34.5	-53.7808	0.93852	6.2681		34.5	-8.12079	4.6388	5.08939		34.5	3.46769	4.03308	3.81847
34.6	-53.617	0.907062	6.38747		34.6	-8.01685	4.54906	5.24541		34.6	3.26887	4.04056	3.83585
34.7	-53.5751	0.751138	6.2125		34.7	-7.97502	4.7949	5.05028		34.7	3.35617	3.9871	3.92964
34.8	-53.6878	0.540287	6.14569		34.8	-7.97376	4.7835	5.1769		34.8	3.35834	3.85876	3.65317
34.9	-53.6041	0.576009	6.38001		34.9	-8.14868	4.96924	5.05854		34.9	3.60744	3.91323	3.48562
35	-53.1181	0.479656	6.41741		35	-8.33271	4.89239	4.85193		35	3.65406	4.30638	3.51101
35.1	-53.0379	0.357936	6.40696		35.1	-8.40495	4.69276	4.93962		35.1	3.43592	4.46926	3.55774
35.2	-52.8222	0.509373	6.64727		35.2	-8.17784	4.7555	4.61574		35.2	3.55601	4.50645	3.63393
35.3	-52.7003	0.709507	6.56073		35.3	-8.41403	4.60311	4.75276		35.3	3.58491	4.65374	3.70556
35.4	-52.9879	0.773455	6.47072		35.4	-8.38891	4.43466	4.84922		35.4	3.51612	4.41389	4.0404
35.5	-52.7861	0.832984	6.60853		35.5	-8.21479	4.59946	4.69931		35.5	3.57455	4.30908	4.06935
35.6	-52.9187	0.814092	6.63142		35.6	-8.29684	4.73557	4.63758		35.6	3.30597	4.34159	3.95759
35.7	-52.864	0.82223	6.55948		35.7	-8.48085	4.7717	4.73095		35.7	3.45295	4.48732	4.03763
35.8	-52.938	0.697754	6.36221		35.8	-8.16439	4.49169	4.92702		35.8	3.36844	4.41408	3.89329
35.9	-53.1304	0.696085	6.44299		35.9	-8.253	4.17634	4.98402		35.9	3.3726	4.43498	3.62186
36	-53.4096	0.58203	6.23246		36	-8.18187	4.29302	4.97872		36	2.98273	4.48342	3.36368
36.1	-53.3573	0.630174	6.44878		36.1	-8.11345	4.14646	4.90318		36.1	2.7744	4.18079	3.52498
36.2	-53.5089	0.576979	6.57677		36.2	-7.87579	4.28519	4.8365		36.2	2.95347	4.21423	3.52445
36.3	-53.5852	0.566338	6.73957		36.3	-8.02438	4.46941	4.98078		36.3	2.85086	4.20314	3.84263
36.4	-53.6287	0.592679	6.68699		36.4	-8.05568	4.50129	5.05525		36.4	2.85904	4.11687	3.58292
36.5	-53.436	0.425178	6.67222		36.5	-8.46812	4.50611	4.86701		36.5	3.02838	4.04538	3.56754
36.6	-53.5843	0.606011	6.6238		36.6	-8.63225	4.57912	4.72163		36.6	3.35071	4.07588	3.81472
36.7	-53.6172	0.452366	6.48122		36.7	-8.68297	4.61595	4.69381		36.7	3.42596	4.02901	3.69602
36.8	-53.5998	0.548018	6.59256		36.8	-8.62244	4.55373	4.50596		36.8	3.2578	4.19965	3.41571
36.9	-53.6951	0.616801	6.41415		36.9	-8.647	4.68529	4.45272		36.9	3.1801	4.32142	3.32491
37	-53.4981	0.518218	6.32335		37	-8.7241	4.86387	4.68823		37	3.1222	4.25676	3.76062
37.1	-53.4858	0.695869	6.19517		37.1	-8.45962	4.49886	4.76094		37.1	2.90931	4.28158	3.68306
37.2	-53.2629	0.68225	6.08906		37.2	-8.20932	4.7856	4.87257		37.2	2.85482	4.40996	3.61755
37.3	-53.3673	0.716869	6.14609		37.3	-8.18742	4.78134	5.01705		37.3	2.8413	4.39232	3.7915
37.4	-53.4937	0.54317	6.35183		37.4	-8.24213	4.76768	4.83255		37.4	3.1459	4.28266	3.81886
37.5	-53.2713	0.629117	6.56766		37.5	-8.07229	4.34668	4.97127		37.5	3.36632	4.39975	3.70963
37.6	-53.4124	0.501882	6.65656		37.6	-7.90795	4.16574	4.96751		37.6	3.4319	4.32026	3.56735
37.7	-53.6786	0.475891	6.51967		37.7	-7.82598	4.39946	4.98866		37.7	3.308	4.41037	3.58406
37.8	-53.5972	0.502149	6.36117		37.8	-7.80263	4.32936	4.79262		37.8	3.39448	4.25416	3.5673
37.9	-53.8286	0.357334	6.07709		37.9	-7.96623	4.16474	4.60887		37.9	3.15875	4.09316	3.75389
38	-53.6675	0.540109	6.16001		38	-8.00994	4.16352	4.57476		38	3.09932	4.14785	3.93992
38.1	-53.3794	0.678569	6.27981		38.1	-8.18074	4.18453	4.59447		38.1	3.00866	4.32397	4.07482
38.2	-53.4134	0.661851	6.21652		38.2	-8.2329	4.26486	4.47026		38.2	2.9921	4.22199	3.79599
38.3	-53.4923	0.589641	6.43781		38.3	-8.46215	4.18614	4.68727		38.3	2.84218	4.27746	3.826
38.4	-53.432	0.765394	6.50979		38.4	-8.36763	4.0245	4.84213		38.4	2.69994	4.20345	3.91413
38.5	-53.3504	0.404693	6.42773		38.5	-8.06032	3.89382	4.98441		38.5	2.68557	3.98424	3.63983
38.6	-53.2792	0.389754	6.19905		38.6	-8.14748	3.98656	5.06795		38.6	2.58563	4.22613	3.54235
38.7	-53.3437	0.603375	6.34643		38.7	-8.34316	4.06691	4.6684		38.7	2.5767	3.87847	3.4882
38.8	-53.5876	0.701486	6.28582		38.8	-8.35783	4.24319	4.55644		38.8	2.47418	4.02601	3.53552
38.9	-53.5829	0.667791	6.37554		38.9	-8.0344	4.18364	4.53272		38.9	2.79423	3.83013	3.65656
39	-53.6368	0.693936	5.91129		39	-8.17252	4.14676	4.51863		39	2.90901	4.01655	3.6848
39.1	-53.4709	0.729377	5.95453		39.1	-8.248	4.16994	4.45479		39.1	2.68393	3.98167	3.41376
39.2	-53.3659	0.681043	6.04437		39.2	-8.09759	3.95227	4.38438		39.2	2.92121	4.20631	3.58776
39.3	-52.8844	0.885181	6.45533		39.3	-8.03407	4.51277	4.15351		39.3	3.03608	4.16968	3.6705
39.4	-52.6776	0.783257	6.60273		39.4	-7.92275	4.58078	4.44031		39.4	2.93585	4.28976	3.86948
39.5	-52.7426	0.71578	6.46146		39.5	-8.00741	4.59509	4.82314		39.5	2.92881	4.37684	4.00528
39.6	-52.8283	0.747312	6.63791		39.6	-8.02056	4.23018	4.91732		39.6	3.06997	4.43403	3.94058
39.7	-52.7764	1.05385	6.57743		39.7	-8.04221	3.80689	4.7975		39.7	2.96695	4.53405	3.94523
39.8	-52.975	1.11145	6.24575		39.8	-7.99801	4.02645	4.72699		39.8	2.83571	4.31482	3.83184
39.9	-52.9362	0.86828	6.14648		39.9	-8.12196	4.09917	4.63309		39.9	2.82124	4.06458	3.83379
40	-52.8905	0.727525	6.27765		40	-8.39985	4.25708	4.77472		40	3.0512	3.90853	3.82657
40.1	-52.9234	0.53697	6.28062		40.1	-8.15354	4.17002	4.91635		40.1	2.93647	3.8459	3.82497
40.2	-53.0733	0.444923	6.39795		40.2	-8.32851	4.22222	5.18854		40.2	3.1848	4.13654	3.85529
40.3	-52.8226	0.491973	6.65512		40.3	-8.20442	4.45908	5.28907		40.3	2.97182	4.39938	3.86882
40.4	-52.7613	0.291022	6.83001		40.4	-8.35895	4.0762	5.26924		40.4	3.11297	4.36105	3.85859
40.5	-52.6435	0.220064	6.91523		40.5	-8.33775	4.09902	4.98524		40.5	2.87172	4.37698	3.65796
40.6	-52.4141	0.474044	7.02712		40.6	-8.25194	4.24743	5.07356		40.6	2.87664	4.12586	3.89939
40.7	-52.2695	0.727864	6.81468		40.7	-8.38831	4.38194	5.02304		40.7	3.05862	4.36614	3.58533
40.8	-52.4734	0.78395	6.68756		40.8	-8.31031	4.57955	5.139		40.8	3.2073	4.40502	3.44907
40.9	-52.4847	0.968162	6.88147		40.9	-8.157	4.58085	4.93428		40.9	3.1577	4.0172	3.48941
41	-52.6457	0.650649	6.96007		41	-8.4189	4.68563	4.98751		41	3.00473	4.09358	3.63025
41.1	-52.6451	0.790292	6.99118		41.1	-8.42506	4.67703	4.77028		41.1	3.15111	4.07363	3.82618
41.2	-52.769	1.119	6.94505		41.2	-8.56963	4.60076	4.83832		41.2	3.31437	4.34963	3.69574
41.3	-52.8772	1.0672	7.05481		41.3	-8.54763	4.66963	4.99454		41.3	3.2329	4.44553	3.76334
41.4	-52.6995	1.11896	6.75246		41.4	-8.6824	4.49758	4.95441		41.4	3.17389	4.28881	3.56613
41.5	-52.8627	1.16762	6.83065		41.5	-8.63749	4.49536	4.8494		41.5	3.2935	4.356	3.72693
41.6	-52.7163	1.35698	6.553		41.6	-8.53961	4.30357	4.82494		41.6	3.13615	4.09335	3.60422
41.7	-52.4807	1.18777	6.31231		41.7	-8.09367	4.3263	4.86987		41.7	3.14084	4.42767	3.55256
41.8	-52.3033	0.939293	6.36798		41.8	-8.09805	4.12713	4.89032		41.8	3.19992	4.5022	3.87157
41.9	-51.9336	1.16792	6.8072		41.9	-8.14326	4.11777	4.70884		41.9	3.16637	4.37029	3.63606
42	-51.9617	1.17507	6.98579		42	-8.46389	4.26993	4.79714		42	3.1496	4.34398	3.64691
42.1	-51.9565	1.0588	6.87911		42.1	-8.33189	4.33796	4.84478		42.1	3.04311	4.12983	3.91372
42.2	-52.0462	1.06889	6.83416		42.2	-8.18659	4.54888	4.97996		42.2	3.0286	3.86191	4.18201
42.3	-52.0058	0.87863	6.55191		42.3	-7.93505	4.7184	4.90221		42.3	2.75578	3.95654	3.86594
42.4	-51.8339	1.07469	6.59113		42.4	-8.342	4.93658	4.61554		42.4	2.44801	4.04007	3.66905
42.5	-51.4043	1.07382	6.59784		42.5	-8.28038	4.9666	4.73883		42.5	2.59728	4.15542	3.61023
42.6	-51.6015	1.04815	6.3055		42.6	-8.45354	4.92449	4.56667		42.6	2.71275	4.2204	3.54743
42.7	-51.434	1.09003	6.25756		42.7	-8.74225	4.67881	4.75733		42.7	2.94719	4.17555	3.42002
42.8	-51.3542	1.05515	6.39571		42.8	-8.81445	4.49284	4.60382		42.8	2.81836	4.28088	3.34183
42.9	-51.1528	0.972745	6.44807		42.9	-8.69066	4.37099	4.75516		42.9	2.84238	4.12972	3.16488
43	-51.015	1.38453	6.59933		43	-8.52165	4.45501	4.90347		43	2.77076	4.1117	3.10696
43.1	-50.9119	1.36212	6.72044		43.1	-8.50284	4.61144	4.98326		43.1	2.90563	4.07524	3.52191
43.2	-51.0812	1.65829	7.00037		43.2	-8.61933	4.53399	4.78357		43.2	2.57026	4.07383	3.75479
43.3	-51.089	1.70591	6.83152		43.3	-8.76702	4.55955	4.73763		43.3	2.61637	4.12644	3.75553
43.4	-51.1691	1.46423	6.82115		43.4	-8.61755	4.58381	4.7826		43.4	2.59276	4.08241	3.65561
43.5	-51.1578	1.43189	6.6632		43.5	-8.53702	4.54932	4.83977		43.5	2.54886	4.27008	3.59185
43.6	-50.9991	1.53999	6.56321		43.6	-8.70351	4.35197	4.9734		43.6	2.59815	4.01318	3.3933
43.7	-51.2299	1.60098	6.4162		43.7	-8.95461	4.18711	5.19135		43.7	2.80903	3.91317	3.34908
43.8	-51.3895	1.58881	6.4161		43.8	-9.12414	4.24343	4.9913		43.8	2.89119	3.95985	3.49163
43.9	-51.3537	1.70785	6.77197		43.9	-8.97354	4.30292	4.8912		43.9	3.20511	3.86701	3.11233
44	-51.2428	1.45406	6.89882		44	-9.01562	4.22674	4.79451		44	3.07763	3.97826	3.10665
44.1	-51.7574	1.36552	6.64817		44.1	-9.05214	4.28511	4.45975		44.1	2.99973	3.83937	3.27056
44.2	-51.6578	1.35169	6.71619		44.2	-8.72795	4.25952	4.49719		44.2	3.14487	3.91979	3.20475
44.3	-51.8152	1.26486	6.60284		44.3	-8.76692	4.25483	4.4581		44.3	3.22658	3.73355	3.33017
44.4	-51.4689	1.18444	6.45355		44.4	-8.71184	4.11725	4.38841		44.4	3.18153	3.76297	3.38822
44.5	-51.4805	1.17928	6.22324		44.5	-8.497	4.287	4.31046		44.5	3.10633	3.63104	3.73629
44.6	-51.3668	1.22025	6.16319		44.6	-8.45688	4.13413	4.38189		44.6	3.14578	3.83536	3.59018
44.7	-51.2672	1.17674	6.31868		44.7	-8.30335	4.11114	4.53736		44.7	3.2354	3.87274	3.44352
44.8	-51.2692	1.11713	6.36949		44.8	-8.07228	4.22145	4.72535		44.8	3.54192	4.08693	3.48865
44.9	-51.2456	1.05417	6.66338		44.9	-7.97452	4.22041	4.70862		44.9	3.67144	4.15833	3.71288
45	-51.2483	1.11851	6.85324		45	-7.78262	4.1052	4.54802		45	3.49089	4.11701	3.62138
45.1	-51.234	0.817877	6.86092		45.1	-7.81633	4.08957	4.5034		45.1	3.07198	4.29218	3.63995
45.2	-51.3545	1.14038	6.99796		45.2	-7.89097	3.94368	4.43246		45.2	3.01978	4.25314	3.79995
45.3	-51.5053	1.10948	7.03214		45.3	-8.12361	3.89733	4.4206		45.3	2.96301	4.13738	3.86786
45.4	-51.4557	1.00114	7.14321		45.4	-7.99129	4.28009	4.58871		45.4	2.90314	4.09277	3.73249
45.5	-51.4832	1.32348	7.09483		45.5	-7.95336	4.04131	4.54608		45.5	3.03631	3.80137	3.61727
45.6	-51.505	1.35644	6.88211		45.6	-7.92745	4.17552	4.40155		45.6	3.05451	3.86196	3.26799
45.7	-51.5514	1.3877	6.96581		45.7	-7.73905	4.26744	4.55255		45.7	2.85186	3.70347	3.33306
45.8	-51.2448	1.56277	7.0434		45.8	-7.69658	4.12557	4.9629		45.8	2.84672	3.75344	3.42387
45.9	-51.119	1.30731	7.14268		45.9	-7.54142	4.17289	5.22667		45.9	2.5486	3.82618	3.54394
46	-51.2392	1.27618	7.01491		46	-7.74979	4.14194	4.93316		46	2.79277	3.82377	3.43612
46.1	-51.01	1.21689	6.98829		46.1	-7.72471	4.02717	4.98139		46.1	2.61211	3.95353	3.52597
46.2	-50.7918	1.17929	6.83701		46.2	-7.76015	3.92723	4.96882		46.2	2.5009	3.78377	3.51417
46.3	-50.9261	1.10472	6.88615		46.3	-7.95869	3.9103	4.71899		46.3	2.43771	3.80713	3.34333
46.4	-51.201	1.22114	7.14967		46.4	-8.04539	4.00447	4.64242		46.4	2.51084	3.80967	3.64417
46.5	-51.3096	1.37636	7.22744		46.5	-8.12901	4.19708	4.53774		46.5	2.56698	3.61731	3.59515
46.6	-51.4204	1.26564	7.23553		46.6	-7.97343	3.9999	4.44308		46.6	2.84022	3.61635	3.75756
46.7	-51.3292	1.27314	7.32676		46.7	-7.96769	3.82709	4.47253		46.7	2.8668	3.75098	3.62097
46.8	-50.8547	1.37991	7.41042		46.8	-7.96136	3.80519	4.32397		46.8	2.56549	3.66754	3.50589
46.9	-50.8091	1.24646	7.58668		46.9	-7.86511	3.99269	4.23055		46.9	2.76233	3.51022	3.38439
47	-50.4753	1.29357	7.32952		47	-7.95603	3.83044	4.32106		47	2.90623	3.87625	3.30614
47.1	-50.3594	1.19444	7.12979		47.1	-8.19661	3.63008	4.23112		47.1	2.88937	3.98725	3.54034
47.2	-50.4816	1.24441	7.02488		47.2	-8.49453	3.68432	4.35618		47.2	2.82461	4.09918	3.52229
47.3	-50.6209	1.41966	6.89744		47.3	-8.41209	3.72732	4.27748		47.3	2.6892	3.92856	3.39299
47.4	-50.6458	1.34901	6.8377		47.4	-8.47541	3.92625	4.07997		47.4	2.83977	3.78865	3.42986
47.5	-50.8311	1.42952	7.11362		47.5	-8.32292	4.04402	3.99851		47.5	2.83935	3.69111	3.24193
47.6	-50.9555	1.3903	7.07207		47.6	-8.29585	4.07629	3.91352		47.6	2.77082	3.63748	3.38267
47.7	-51.0249	1.32304	7.03001		47.7	-8.31365	4.26614	4.12627		47.7	3.2345	3.83914	3.381
47.8	-50.682	1.29029	6.75803		47.8	-8.29742	4.38597	4.28723		47.8	3.09284	4.0251	3.43474
47.9	-50.9445	0.981431	6.71068		47.9	-8.38988	4.30364	4.18006		47.9	3.00077	4.03493	3.36622
48	-50.9253	0.882113	6.44522		48	-8.3911	4.43949	4.38217		48	2.96991	4.01232	3.46037
48.1	-51.0252	0.784284	6.26769		48.1	-8.40034	4.17239	4.33804		48.1	2.64782	4.09069	3.4834
48.2	-50.9595	0.94962	6.32008		48.2	-8.49252	4.06634	4.55806		48.2	2.57502	4.24622	3.46188
48.3	-51.3046	1.29374	6.46164		48.3	-8.35713	4.10332	4.83639		48.3	2.60374	4.06586	3.24759
48.4	-51.5741	1.09837	6.52127		48.4	-8.4934	4.09752	4.89784		48.4	2.41975	4.30782	3.32375
48.5	-51.4406	1.14595	6.79685		48.5	-8.54203	3.85483	4.74589		48.5	2.75407	4.26934	3.34667
48.6	-51.5888	1.18974	6.98701		48.6	-8.49746	3.98028	4.28192		48.6	2.50445	4.24282	3.26261
48.7	-51.3781	1.54172	7.15357		48.7	-8.40203	4.18155	4.20161		48.7	2.39683	4.03029	3.40398
48.8	-51.2958	1.5624	7.22739		48.8	-8.6282	4.11791	4.33677		48.8	2.3318	3.87735	3.55208
48.9	-50.9341	1.76478	7.10383		48.9	-8.58318	3.96172	4.64883		48.9	2.51095	3.69077	3.65684
49	-50.8795	1.76622	6.98553		49	-8.77797	4.29763	4.42874		49	2.65377	3.94364	3.58906
49.1	-50.8986	1.78691	6.84866		49.1	-8.67833	4.27164	4.20523		49.1	2.69807	3.89221	3.50645
49.2	-51.0657	1.64897	6.6786		49.2	-8.41513	4.27163	4.1306		49.2	2.4832	4.0578	3.31328
49.3	-51.0595	1.55841	6.59956		49.3	-8.70175	4.06468	3.869		49.3	2.25236	4.18534	3.25747
49.4	-50.6121	1.36832	6.87011		49.4	-8.61255	4.23418	3.85963		49.4	2.454	3.9381	3.32248
49.5	-50.5712	1.1599	7.08943		49.5	-8.59484	4.10538	4.01954		49.5	2.51211	3.87024	3.28517
49.6	-50.4231	1.04367	6.94471		49.6	-8.75394	4.04323	4.2757		49.6	2.61054	3.64004	3.18464
49.7	-50.5072	1.33014	7.02817		49.7	-8.42811	4.1319	4.55393		49.7	2.4447	3.67493	3.06506
49.8	-50.6356	1.25501	6.89811		49.8	-8.42897	4.0176	4.59254		49.8	2.12868	3.46657	3.30212
49.9	-50.3852	1.30788	6.99595		49.9	-8.16132	4.01957	4.81509		49.9	2.14873	3.44779	3.30624
50	-50.1424	1.53528	6.88813		50	-8.5004	4.12027	4.83478		50	2.06138	3.80285	3.38678
50.1	-49.9616	1.18779	7.0043		50.1	-8.55162	4.06322	4.76116		50.1	2.25825	3.77826	3.32651
50.2	-49.8797	1.04894	6.88833		50.2	-8.59393	3.95232	4.67125		50.2	2.59236	3.99032	3.45771
50.3	-49.7827	1.10195	6.86933		50.3	-8.50426	3.97496	4.54571		50.3	2.66447	4.00013	3.58828
50.4	-49.6583	0.823528	7.10173		50.4	-8.26204	4.15608	4.65474		50.4	2.69861	3.72111	3.64173
50.5	-49.6934	1.05215	6.99904		50.5	-8.23637	3.86024	4.59197		50.5	2.82763	3.65463	3.78492
50.6	-49.8947	1.3715	7.202		50.6	-8.19534	3.99317	4.4064		50.6	2.89489	3.51648	3.64603
50.7	-50.0889	1.6197	7.36364		50.7	-8.18858	3.76693	4.40203		50.7	2.85264	3.34541	3.53395
50.8	-49.8943	1.68798	7.25792		50.8	-8.33904	3.87854	4.45759		50.8	3.06454	3.69088	3.53746
50.9	-49.8767	1.88834	7.24654		50.9	-8.32774	3.8707	4.46167		50.9	2.78262	3.67313	3.43656
51	-49.8741	2.17274	7.19597		51	-8.19991	3.88519	4.49232		51	2.6752	3.78048	3.20883
51.1	-49.8469	1.98395	7.16748		51.1	-8.13377	4.11284	4.46481		51.1	2.65129	3.62504	3.22602
51.2	-50.0679	1.73186	6.97572		51.2	-7.95199	4.25494	4.73149		51.2	2.62194	3.57092	3.11577
51.3	-49.8968	1.60788	6.82613		51.3	-8.20728	4.00243	4.50986		51.3	2.94556	3.5127	3.1304
51.4	-50.0311	1.56761	6.74652		51.4	-8.32054	4.04696	4.51158		51.4	2.96204	3.20685	3.25267
51.5	-49.9514	1.36892	7.07282		51.5	-8.32491	3.9259	4.20695		51.5	3.05279	3.291	3.45315
51.6	-49.9159	1.50239	6.84066		51.6	-8.09299	3.64432	4.13251		51.6	3.01717	3.41248	3.3374
51.7	-50.2589	1.67482	7.0736		51.7	-8.18869	3.60126	4.07328		51.7	3.07841	3.42644	3.25656
51.8	-50.6014	1.77613	6.87755		51.8	-8.05285	3.68995	4.27008		51.8	3.03582	3.73105	3.20907
51.9	-50.5199	1.5513	6.91105		51.9	-8.18141	3.65164	4.57531		51.9	2.95119	4.02905	3.1772
52	-50.4505	1.77833	6.62103		52	-8.2551	3.85996	4.31885		52	2.90621	3.93402	3.03745
52.1	-50.8547	1.73794	6.4349		52.1	-8.16538	3.80299	4.28417		52.1	2.56917	3.98996	3.03567
52.2	-50.9057	1.47132	6.29801		52.2	-7.98937	4.04208	4.2911		52.2	2.54291	4.08059	3.41018
52.3	-50.9274	1.54182	6.64036		52.3	-8.15037	3.93749	4.51541		52.3	2.39412	4.31612	3.47737
52.4	-50.8465	1.5044	6.87471		52.4	-8.04707	4.02956	4.75679		52.4	2.25567	4.25912	3.44074
52.5	-50.645	1.5451	7.13781		52.5	-8.02179	3.9291	4.88171		52.5	2.33795	4.24605	3.19051
52.6	-50.5037	1.87213	7.39114		52.6	-8.0326	4.0613	4.68322		52.6	2.60646	4.08966	3.54954
52.7	-50.6146	1.8001	7.43396		52.7	-8.04661	4.06546	4.30807		52.7	2.40628	4.05684	3.30877
52.8	-50.5556	1.59661	7.57371		52.8	-8.209	4.14314	4.21893		52.8	2.63431	3.94899	3.20125
52.9	-50.2694	1.57509	7.58955		52.9	-8.4523	4.20774	4.09861		52.9	2.7385	4.24981	3.13449
53	-50.1261	1.68086	7.43511		53	-8.27558	4.19918	4.24669		53	2.47456	4.2288	2.88311
53.1	-50.0161	1.76202	7.60189		53.1	-8.34776	4.03073	4.3171		53.1	2.52597	4.3206	3.00741
53.2	-50.0866	1.69442	7.77612		53.2	-8.45717	4.31874	4.24822		53.2	2.51261	4.28233	3.05202
53.3	-50.0896	1.73134	7.99854		53.3	-8.67133	4.13806	4.27892		53.3	2.34802	4.27879	3.09489
53.4	-49.9035	1.70906	7.95223		53.4	-8.97961	4.23713	4.46557		53.4	2.41152	4.11079	3.10256
53.5	-49.759	1.88844	7.58489		53.5	-8.906	4.05343	4.15487		53.5	2.38921	4.14729	2.90455
53.6	-49.5808	1.90801	7.68187		53.6	-9.0162	3.81234	4.02548		53.6	2.26072	3.99026	3.18446
53.7	-49.6912	1.66609	7.50322		53.7	-8.90943	3.56716	3.99048		53.7	2.12988	4.04715	3.0942
53.8	-49.7833	1.78631	7.3118		53.8	-8.84033	3.52704	3.9394		53.8	2.35537	3.82003	3.12551
53.9	-49.9745	2.01557	7.19632		53.9	-8.82417	3.56689	3.99293		53.9	2.41088	3.60696	2.98527
54	-49.7602	2.11909	7.37931		54	-8.37646	3.66076	4.03945		54	2.46089	3.50805	2.92462
54.1	-50.0349	1.92882	7.45139		54.1	-8.03045	3.61421	3.82977		54.1	2.52699	3.65046	2.97788
54.2	-50.25	2.0337	7.43288		54.2	-8.18795	3.70451	3.87848		54.2	2.46673	3.6167	2.99152
54.3	-50.4448	1.7385	7.51765		54.3	-8.24315	3.78431	3.94813		54.3	2.47566	3.97582	2.90406
54.4	-50.4435	1.51323	7.4519		54.4	-8.38542	3.85641	4.12827		54.4	2.42513	3.90458	3.03275
54.5	-50.2419	1.31266	7.34075		54.5	-8.28143	3.66466	4.0146		54.5	2.60687	3.76274	3.0129
54.6	-50.0799	1.56476	7.25122		54.6	-8.23488	3.51307	4.24636		54.6	2.81188	3.5729	2.98856
54.7	-49.7685	1.5469	7.38283		54.7	-8.08306	3.49496	4.34322		54.7	3.01101	3.60397	3.15996
54.8	-49.9766	1.76792	7.41698		54.8	-8.07628	3.57029	4.32325		54.8	3.08548	3.34498	3.06693
54.9	-50.2072	1.8175	7.55839		54.9	-8.12951	3.56187	4.29894		54.9	3.08222	3.37876	3.03999
55	-50.18	1.95451	7.56224		55	-7.97919	3.70128	4.23329		55	2.91243	3.33451	3.15804
55.1	-49.7596	1.85612	7.5154		55.1	-7.87834	3.84692	4.27214		55.1	2.89126	3.40678	3.25078
55.2	-49.8939	1.93894	7.45117		55.2	-8.00896	4.08966	4.50116		55.2	2.80835	3.64507	3.30558
55.3	-49.8957	1.8169	7.39169		55.3	-8.05466	4.02212	4.65911		55.3	2.67359	3.72399	3.59018
55.4	-49.9061	1.86547	7.44423		55.4	-8.20752	4.2373	4.52667		55.4	2.61368	3.64791	3.56853
55.5	-49.8898	1.70502	7.44385		55.5	-8.03799	4.0624	4.565		55.5	2.64945	3.58808	3.39276
55.6	-50.2281	1.89627	7.40721		55.6	-7.93252	4.05295	4.60166		55.6	2.6614	3.56529	3.3035
55.7	-50.3844	1.93449	7.40763		55.7	-8.07035	4.21437	4.71808		55.7	2.51517	3.40069	3.29811
55.8	-50.4317	1.76435	7.28366		55.8	-8.19043	4.05034	4.52737		55.8	2.48418	3.20998	3.15417
55.9	-50.6809	1.82517	7.19247		55.9	-8.2942	4.02161	4.3022		55.9	2.44974	3.12486	2.95685
56	-50.2656	1.99843	7.38767		56	-8.37835	3.96917	4.17092		56	2.4399	3.22409	3.26006
56.1	-50.2799	1.88593	7.1325		56.1	-8.35589	3.94586	4.11727		56.1	2.23239	3.55019	3.32518
56.2	-50.2156	1.89	7.23303		56.2	-8.39541	4.27043	4.14592		56.2	2.40916	3.3237	3.44933
56.3	-50.1757	1.75807	7.24786		56.3	-8.21807	4.33102	4.10417		56.3	2.51329	3.38653	3.41979
56.4	-50.2262	1.72623	7.34166		56.4	-7.97087	4.14353	4.25628		56.4	2.45582	3.49283	3.20187
56.5	-50.1871	1.84509	7.19216		56.5	-7.68263	4.10072	4.15847		56.5	2.56718	3.29685	3.2083
56.6	-50.2991	2.09767	7.26004		56.6	-7.7866	4.09157	4.08979		56.6	2.63365	3.51055	3.35469
56.7	-50.2843	2.03178	7.32592		56.7	-7.78223	3.97733	3.93754		56.7	2.58069	3.38379	3.41321
56.8	-50.0508	1.92247	7.27193		56.8	-7.76806	4.06148	3.74626		56.8	2.74121	3.33054	3.54502
56.9	-50.0924	1.92558	6.94496		56.9	-7.84029	4.24156	3.72952		56.9	2.73393	3.26897	3.36075
57	-49.943	1.84539	6.66063		57	-8.23228	4.25839	3.85227		57	2.71012	3.21762	3.41256
57.1	-49.5965	1.8045	6.86642		57.1	-8.68737	4.30112	4.03418		57.1	2.97209	3.28823	3.26163
57.2	-49.7714	1.99154	6.98122		57.2	-8.86173	4.00195	3.91047		57.2	2.61232	3.40234	3.20196
57.3	-49.5313	1.84494	6.87622		57.3	-8.85374	3.90026	4.07425		57.3	2.61193	3.52915	3.17345
57.4	-49.7456	1.71837	6.78559		57.4	-8.99079	3.90275	4.23174		57.4	2.38835	3.36878	3.4904
57.5	-49.9264	1.43519	6.66796		57.5	-8.74634	3.72937	4.43005		57.5	2.52488	3.49268	3.47989
57.6	-49.9747	1.60275	6.93881		57.6	-8.60721	3.74854	4.11358		57.6	2.63286	3.87507	3.24629
57.7	-49.8738	1.91328	7.03236		57.7	-8.71427	3.67055	4.24952		57.7	2.51075	3.87862	3.14156
57.8	-49.952	1.77533	7.10751		57.8	-8.53696	3.92842	4.16753		57.8	2.50722	3.88518	3.09006
57.9	-49.777	1.74864	6.8525		57.9	-8.36265	3.93424	4.52939		57.9	2.74218	3.75458	3.08044
58	-49.7951	1.90956	6.89553		58	-8.45872	3.8807	4.38706		58	2.75066	3.82563	2.93558
58.1	-49.7459	2.02427	6.93231		58.1	-8.20548	3.62183	4.19554		58.1	2.54709	3.62513	3.07026
58.2	-49.8279	2.01817	7.27128		58.2	-8.14791	3.44689	4.26522		58.2	2.78359	3.62066	2.98993
58.3	-49.8061	2.07657	7.26874		58.3	-8.1934	3.53954	4.24358		58.3	2.75284	3.72507	2.84697
58.4	-49.7752	2.03375	7.45947		58.4	-8.1443	3.57043	3.97029		58.4	2.60208	3.7745	2.84505
58.5	-49.8788	2.07671	7.4409		58.5	-8.03497	3.69429	3.84585		58.5	2.80038	3.78414	2.99595
58.6	-49.6657	1.91871	7.25137		58.6	-8.19836	3.88819	3.74427		58.6	2.52856	4.06177	3.17633
58.7	-49.8238	2.06636	7.2796		58.7	-8.30428	3.94925	3.94909		58.7	2.58098	3.74293	3.27076
58.8	-49.4062	2.03971	7.22527		58.8	-8.42789	3.99835	4.08223		58.8	2.47888	3.5373	3.20427
58.9	-49.1325	1.77863	7.24833		58.9	-8.21351	3.86863	4.23705		58.9	2.28993	3.4602	3.27952
59	-49.1731	1.7617	7.48624		59	-8.27842	3.80507	4.00239		59	2.12085	3.46974	3.35235
59.1	-48.9733	1.74126	7.36812		59.1	-8.42226	3.80772	4.31291		59.1	2.48397	3.47907	3.45164
59.2	-48.9896	1.73282	7.22388		59.2	-8.50751	3.7259	4.2102		59.2	2.70092	3.37529	3.25221
59.3	-48.8908	2.11331	7.39028		59.3	-8.43972	3.57188	4.30144		59.3	2.57776	3.41869	3.15003
59.4	-49.0127	1.99716	7.45658		59.4	-8.43013	3.51073	4.39551		59.4	2.67229	3.4036	3.23785
59.5	-49.1056	2.03829	7.48688		59.5	-8.84337	3.61012	4.30614		59.5	2.79417	3.37216	3.35668
59.6	-49.2358	2.14055	7.51998		59.6	-8.88579	3.57057	4.15733		59.6	2.75603	3.64285	3.31781
59.7	-49.2511	2.02174	7.41347		59.7	-8.98329	3.80806	4.17275		59.7	2.76536	3.46009	3.22426
59.8	-49.2691	1.81942	7.38728		59.8	-8.8414	3.80837	4.09976		59.8	2.71634	3.69321	3.30749
59.9	-49.6953	1.54949	6.96393		59.9	-8.89965	3.86661	4.10664		59.9	2.48956	3.42406	3.16991
60	-49.7811	2.04453	7.34733		60	-8.78069	3.90289	3.9041		60	2.4424	3.323	3.16621
60.1	-49.8559	2.17997	7.4897		60.1	-8.95008	4.23077	4.01455		60.1	2.60246	3.68126	3.1694
60.2	-49.6002	2.2089	7.69842		60.2	-9.16916	4.34312	3.99112		60.2	2.59643	3.74688	3.1927
60.3	-49.3062	1.84423	7.71553		60.3	-9.19304	4.22926	3.92791		60.3	2.65438	3.40255	3.2844
60.4	-49.3909	1.74297	7.91723		60.4	-9.03088	4.05626	3.92782		60.4	2.7506	3.48325	3.18004
60.5	-48.9656	1.79136	7.85955		60.5	-9.06829	4.09573	4.09099		60.5	2.59828	3.71375	3.19327
60.6	-49.0868	1.82897	7.92916		60.6	-8.96392	4.06344	4.11288		60.6	2.38387	3.61984	3.2027
60.7	-48.9546	2.00221	7.99845		60.7	-8.70083	3.97216	4.22175		60.7	2.3063	3.72927	3.13217
60.8	-48.948	2.20382	7.87639		60.8	-8.57829	4.13102	4.21886		60.8	2.08924	3.64149	3.07142
60.9	-49.0102	2.19592	7.6385		60.9	-8.45513	3.94256	4.30898		60.9	2.2922	3.73905	3.49456
61	-48.797	2.44353	7.68007		61	-8.56887	3.94872	4.37423		61	2.38272	3.73362	3.54526
61.1	-48.9095	2.51739	7.53756		61.1	-8.52454	3.94693	4.46652		61.1	2.48504	3.62035	3.25366
61.2	-48.8511	2.34453	7.53653		61.2	-8.44137	3.93744	4.4789		61.2	2.85499	3.9629	3.06228
61.3	-48.9675	2.20346	7.72744		61.3	-8.4124	3.79716	4.47719		61.3	2.86471	4.09296	3.16616
61.4	-49.185	2.41265	7.5989		61.4	-8.59136	3.87025	4.53363		61.4	2.56265	4.03403	2.90261
61.5	-49.109	2.18651	7.51545		61.5	-8.78243	4.19746	4.31742		61.5	2.4807	4.00789	2.97554
61.6	-49.2562	2.04612	7.55617		61.6	-9.27249	4.27364	4.25418		61.6	2.58866	3.74504	2.96249
61.7	-49.3247	2.00563	7.51296		61.7	-9.19167	4.06625	4.1262		61.7	2.60993	3.65735	3.19326
61.8	-49.2442	1.92678	7.65483		61.8	-9.23702	3.96629	4.23652		61.8	2.65006	3.50324	3.24093
61.9	-49.0398	1.96195	7.64668		61.9	-9.44912	4.21396	4.04143		61.9	2.57768	3.59288	3.32078
62	-49.0136	1.953	7.66704		62	-9.58111	4.16121	3.8805		62	2.64359	3.71016	3.32223
62.1	-48.8985	2.09263	7.69592		62.1	-9.38014	3.9966	4.00293		62.1	2.61669	3.62394	3.36928
62.2	-48.9103	2.15365	7.82487		62.2	-9.14142	3.90193	3.95466		62.2	2.69751	3.68429	3.1809
62.3	-48.8799	2.02656	7.78368		62.3	-9.16047	4.04706	4.25903		62.3	2.5632	3.61772	2.94809
62.4	-48.8285	1.94761	7.89208		62.4	-9.15443	3.93568	4.15746		62.4	2.49664	3.63167	2.79992
62.5	-48.6141	2.08905	8.16592		62.5	-9.06309	3.83948	4.29936		62.5	2.4815	3.70611	2.60848
62.6	-48.7238	1.94734	8.16045		62.6	-9.14486	3.827	4.51471		62.6	2.7248	3.47504	2.46524
62.7	-48.6745	2.1213	7.87733		62.7	-9.17813	3.84563	4.56336		62.7	2.55316	3.6045	2.50502
62.8	-49.0452	1.98328	7.90407		62.8	-9.15005	3.77876	4.40961		62.8	2.73797	3.52752	2.70228
62.9	-49.0173	2.01871	7.54883		62.9	-9.26249	4.02511	4.41898		62.9	2.42361	3.46718	2.46408
63	-49.2171	2.03352	7.43521		63	-9.26757	4.37411	4.3835		63	2.45969	3.24381	2.5057
63.1	-49.2222	2.14986	7.58756		63.1	-9.12681	4.25119	4.36308		63.1	2.31992	3.2206	2.66861
63.2	-49.2803	2.39545	7.80981		63.2	-8.8753	4.1814	4.18012		63.2	2.36021	3.11516	2.70143
63.3	-49.2335	2.75564	7.68081		63.3	-8.5256	4.00079	4.09273		63.3	2.23621	3.0011	2.98612
63.4	-49.3005	2.42484	7.9033		63.4	-8.96526	3.90226	3.94138		63.4	2.27236	2.92111	3.03879
63.5	-49.5459	2.47711	7.895		63.5	-9.04366	3.78284	4.02207		63.5	2.59569	2.93693	3.18711
63.6	-49.7093	2.32679	7.78635		63.6	-8.88767	3.51961	3.78		63.6	2.6242	2.91686	3.29278
63.7	-50.1195	2.26804	7.77012		63.7	-8.84475	3.38644	3.73716		63.7	2.8119	3.28242	3.25411
63.8	-50.0857	2.32277	7.85668		63.8	-8.56017	2.97426	3.73971		63.8	2.93113	3.52462	3.19865
63.9	-50.0321	1.99966	7.80746		63.9	-8.54406	3.39673	3.75025		63.9	2.86414	3.50949	3.14288
64	-50.0075	2.0634	7.61496		64	-8.74454	3.46994	3.58673		64	2.86859	3.26924	2.98579
64.1	-49.8784	2.22793	7.36445		64.1	-8.95243	3.5993	3.78497		64.1	2.79448	3.25676	2.84009
64.2	-49.9791	2.07428	7.19778		64.2	-8.78346	3.7481	3.8634		64.2	2.60268	3.24024	2.71656
64.3	-49.6311	1.92489	7.12214		64.3	-8.86365	3.79165	4.00442		64.3	2.57051	3.24262	2.86656
64.4	-49.4331	2.04792	7.4707		64.4	-8.66918	4.12715	4.23668		64.4	2.39843	3.48482	2.83303
64.5	-49.1082	1.87444	7.4184		64.5	-8.66581	4.09527	4.52134		64.5	2.29324	3.48415	2.85423
64.6	-49.2163	1.89763	7.66365		64.6	-8.55704	4.18007	4.47046		64.6	2.45649	3.44031	2.82919
64.7	-49.1184	1.92787	7.79355		64.7	-8.33502	4.18324	4.35289		64.7	2.59364	3.42607	3.15221
64.8	-49.4609	2.18073	7.7622		64.8	-8.20585	4.01853	4.4954		64.8	2.57564	3.43277	3.03763
64.9	-49.0908	2.40204	7.70627		64.9	-8.43521	4.1031	4.54158		64.9	2.82179	3.42402	2.80677
65	-49.1633	2.39027	7.70904		65	-8.86126	3.80721	4.37113		65	2.43043	3.30859	2.83669
65.1	-49.051	2.42317	7.91601		65.1	-8.75625	3.72616	4.21133		65.1	2.34524	3.5158	3.03424
65.2	-49.0839	2.4348	7.94772		65.2	-8.46055	3.60436	4.18161		65.2	2.28954	3.51193	3.00003
65.3	-49.2002	2.40417	7.98493		65.3	-8.49901	3.74968	4.35455		65.3	2.44239	3.53628	3.10478
65.4	-49.0851	2.40168	7.68287		65.4	-8.71673	3.8119	4.1181		65.4	2.53443	3.74487	3.09079
65.5	-48.9135	2.10293	7.49283		65.5	-9.06647	3.63094	3.85558		65.5	2.50248	3.84591	2.84328
65.6	-49.1012	2.0291	7.21994		65.6	-9.14373	3.75827	4.06696		65.6	2.35027	3.74102	2.87954
65.7	-48.9533	1.91723	7.38121		65.7	-8.99371	3.83945	4.00745		65.7	2.41055	3.5465	3.01318
65.8	-48.7782	2.21009	7.49935		65.8	-8.8365	3.99962	4.15097		65.8	2.16374	3.46534	3.35229
65.9	-48.7798	2.36031	7.22485		65.9	-8.76592	4.04783	4.07583		65.9	2.15972	3.3712	3.22909
66	-48.7641	2.33755	7.48069		66	-8.58186	4.13703	4.07608		66	2.0181	3.39659	3.20746
66.1	-48.8507	2.24453	7.53035		66.1	-8.39428	3.89187	4.17205		66.1	2.07164	3.45681	2.9146
66.2	-48.8377	2.40624	7.67565		66.2	-8.31261	3.90427	4.04963		66.2	2.03975	3.35895	2.79918
66.3	-48.5416	2.28237	7.62571		66.3	-8.33533	3.99607	4.15967		66.3	2.14043	3.48223	2.76622
66.4	-48.5956	2.26876	7.82029		66.4	-8.46241	4.01272	4.19615		66.4	2.1645	3.6189	2.64688
66.5	-48.7382	2.15412	7.90597		66.5	-8.60054	3.96254	4.27771		66.5	2.30049	3.62132	2.91689
66.6	-48.8724	2.26414	7.67106		66.6	-8.79065	3.68248	4.34236		66.6	2.38955	3.79891	2.85206
66.7	-49.0662	2.30806	7.39398		66.7	-8.99644	3.70214	4.01255		66.7	2.60717	3.80261	2.75752
66.8	-49.325	2.4027	7.81893		66.8	-8.7392	3.74429	3.87354		66.8	2.62294	3.71885	2.57078
66.9	-49.6783	2.50088	7.93394		66.9	-8.71733	3.75786	3.72398		66.9	2.35428	3.88184	2.65521
67	-49.6128	2.64477	8.03498		67	-8.81973	3.76158	3.798		67	2.00251	3.74913	2.89648
67.1	-49.782	2.58097	7.7585		67.1	-9.06561	3.5119	4.0314		67.1	2.34075	3.69811	3.03625
67.2	-49.5633	2.41388	7.51876		67.2	-9.1911	3.43122	3.85959		67.2	2.50322	3.6567	3.24816
67.3	-49.618	2.34815	7.58455		67.3	-9.01013	3.58082	4.03334		67.3	2.47767	3.41924	3.2959
67.4	-49.3972	2.41836	7.68576		67.4	-8.85126	3.62338	4.12486		67.4	2.42365	3.13405	2.96522
67.5	-48.8566	2.29528	7.70308		67.5	-8.642	3.79187	4.13433		67.5	2.53454	3.26347	2.7999
67.6	-48.8505	2.39165	7.99721		67.6	-8.25913	3.80481	4.09007		67.6	2.32316	3.28892	2.836
67.7	-48.7173	2.24639	7.87218		67.7	-8.13834	4.05401	4.25636		67.7	2.29392	3.25	3.01963
67.8	-48.8237	1.95996	7.76161		67.8	-8.38712	3.8538	4.14241		67.8	2.18944	3.40155	3.21156
67.9	-48.5677	1.99247	7.94596		67.9	-8.41652	3.77805	3.88089		67.9	2.30498	3.76107	2.84401
68	-48.5243	1.93766	7.89469		68	-8.34183	3.85821	4.13499		68	2.30617	3.80473	2.89775
68.1	-48.5768	2.29792	8.17014		68.1	-8.30301	4.11891	4.1254		68.1	2.59888	3.8492	2.69736
68.2	-48.2777	2.48597	8.13695		68.2	-8.28641	4.24365	4.2471		68.2	2.49156	3.51569	2.81894
68.3	-48.619	2.50081	8.03048		68.3	-8.41313	3.94934	4.05625		68.3	2.44543	3.80112	2.65007
68.4	-48.6789	2.46054	8.0548		68.4	-8.41303	3.77611	3.82001		68.4	2.09461	3.83263	2.47202
68.5	-48.6533	2.93489	8.14699		68.5	-8.63617	3.82847	4.14922		68.5	2.27082	3.69585	2.58168
68.6	-48.5066	2.84384	7.96443		68.6	-8.43958	4.11229	4.13629		68.6	2.35575	3.71048	2.74678
68.7	-48.5231	2.79431	7.74625		68.7	-8.69533	4.3195	4.11546		68.7	2.65475	3.86068	2.7831
68.8	-48.4701	2.89831	7.74508		68.8	-8.82916	4.21178	3.97649		68.8	2.72073	3.93991	2.71213
68.9	-48.7677	2.54338	7.56253		68.9	-8.78631	4.26528	3.894		68.9	2.75303	4.04153	2.9312
69	-48.8266	2.45044	7.70782		69	-8.87041	4.08124	3.78109		69	2.82753	3.63893	2.78454
69.1	-48.7528	2.25413	7.56158		69.1	-8.67922	4.17496	3.94341		69.1	2.91786	3.42739	2.88163
69.2	-48.6891	2.13858	7.57803		69.2	-8.53554	4.01635	4.0547		69.2	2.86609	3.58352	2.94225
69.3	-48.7333	1.83315	7.42568		69.3	-8.63493	3.9988	4.0234		69.3	2.94544	3.82138	3.20039
69.4	-48.6621	1.9303	7.36713		69.4	-8.56606	3.99547	4.09988		69.4	2.76186	3.72617	3.12193
69.5	-48.6355	2.09929	7.28585		69.5	-8.53369	3.848	4.18713		69.5	2.83123	3.66927	3.15437
69.6	-48.6486	2.28327	7.5112		69.6	-8.56631	3.97986	4.30521		69.6	2.87608	3.63525	3.20146
69.7	-48.7057	2.5985	7.83176		69.7	-8.56587	3.86107	4.56442		69.7	2.63374	3.6262	3.25973
69.8	-48.6535	2.68167	7.58882		69.8	-8.56911	3.71819	4.39623		69.8	2.60239	3.69668	3.10539
69.9	-48.6244	2.69838	7.11052		69.9	-8.41474	3.74537	4.262		69.9	2.71082	3.56889	2.99546
70	-48.2627	2.45673	7.39307		70	-8.33451	4.02157	3.92659		70	2.37691	3.30183	2.82901
70.1	-48.3397	2.61825	7.49066		70.1	-8.39411	4.147	3.48345		70.1	2.30658	3.25935	2.77649
70.2	-48.4614	2.5011	7.87021		70.2	-8.56228	4.07418	3.46807		70.2	2.58106	3.04338	3.02401
70.3	-48.41	2.53386	8.04806		70.3	-8.65451	4.28713	3.54157		70.3	2.70223	3.19769	3.07196
70.4	-48.4664	2.25648	7.87368		70.4	-8.67653	4.12577	3.75012		70.4	2.64861	3.44864	2.989
70.5	-48.5395	2.51654	8.1597		70.5	-8.8472	3.98359	3.90955		70.5	2.60826	3.57417	2.94601
70.6	-48.5716	2.58142	8.20525		70.6	-8.70353	4.13758	4.14607		70.6	2.40708	3.55753	3.00159
70.7	-48.6012	2.50645	8.1456		70.7	-8.5862	3.8804	4.12883		70.7	2.28183	3.43421	2.83755
70.8	-48.6897	2.44632	7.98483		70.8	-8.77069	3.80725	3.86101		70.8	2.52522	3.38575	2.89915
70.9	-48.5907	2.90967	7.82319		70.9	-8.8968	3.78676	4.03669		70.9	2.61602	3.62255	2.83352
71	-48.5345	2.75264	8.01268		71	-8.82551	3.84632	4.25434		71	2.48246	3.69803	2.77697
71.1	-48.4842	2.54154	7.97907		71.1	-8.46285	3.74151	4.26685		71.1	2.5645	3.54256	2.81903
71.2	-48.394	2.25554	7.96504		71.2	-8.2866	3.57811	4.22645		71.2	2.56246	3.8526	2.71206
71.3	-48.2649	2.15256	7.79254		71.3	-8.37942	3.3054	4.19162		71.3	2.69594	3.68835	2.85548
71.4	-48.3908	2.06069	7.4981		71.4	-8.50595	3.27346	4.19511		71.4	2.56908	3.60706	2.95516
71.5	-48.8335	2.26212	7.57694		71.5	-8.33733	3.33861	4.07444		71.5	2.47852	3.44443	2.73723
71.6	-48.7502	2.4616	7.70387		71.6	-8.35412	3.66482	3.9674		71.6	2.33759	3.32646	3.17272
71.7	-48.9763	2.46094	7.88299		71.7	-8.27725	3.70424	4.36278		71.7	2.66144	3.32995	3.12696
71.8	-49.0556	2.5161	7.9055		71.8	-8.53072	3.79952	4.21945		71.8	2.57331	3.19026	3.14663
71.9	-48.6983	2.5028	7.70764		71.9	-8.34775	3.91192	4.07916		71.9	2.63952	3.37874	3.12917
72	-48.7735	2.56767	7.63681		72	-8.42216	4.05555	3.87941		72	2.61255	3.54295	3.18496
72.1	-48.4622	2.40322	8.02521		72.1	-8.30588	4.08902	3.96973		72.1	2.69043	3.58261	2.9862
72.2	-48.469	2.67255	7.97866		72.2	-8.49195	3.97491	4.08188		72.2	2.72496	3.41505	3.06832
72.3	-48.5942	2.60505	8.0613		72.3	-8.65277	3.7226	3.97216		72.3	2.86047	3.31527	3.19459
72.4	-48.7457	2.71328	8.41703		72.4	-8.55111	3.5737	4.06285		72.4	2.55144	3.24532	3.10767
72.5	-48.7255	2.56419	8.10852		72.5	-8.76053	3.7774	4.09309		72.5	2.52652	3.26257	2.78141
72.6	-48.8329	2.64779	7.82421		72.6	-8.75776	3.62174	4.02012		72.6	2.43565	3.67033	2.60499
72.7	-48.9239	2.79532	7.8976		72.7	-8.70011	3.38301	3.97808		72.7	2.34754	3.56129	2.80938
72.8	-48.85	2.81367	7.96335		72.8	-8.5538	3.48354	4.01237		72.8	2.18634	3.50748	2.83679
72.9	-48.8501	2.91014	8.00396		72.9	-8.38217	3.46848	4.0918		72.9	2.19715	3.61189	2.88283
73	-48.8179	2.5471	7.87319		73	-8.33954	3.50559	4.12185		73	2.49168	3.53636	3.01217
73.1	-48.9313	2.40981	7.95511		73.1	-8.40216	3.69154	4.09548		73.1	2.46188	3.60477	3.01692
73.2	-48.7848	2.26346	7.75745		73.2	-8.50393	3.8295	3.99129		73.2	2.36506	3.6238	2.87946
73.3	-48.6606	2.23594	7.90681		73.3	-8.32905	4.19969	4.22729		73.3	2.176	3.60549	2.88356
73.4	-48.3472	2.30868	7.92016		73.4	-8.44196	4.00947	4.11405		73.4	2.17001	3.57953	2.73963
73.5	-48.1576	2.59193	8.10643		73.5	-8.24149	3.9475	4.08383		73.5	1.9171	3.50186	2.79793
73.6	-47.9082	2.70829	7.95963		73.6	-8.00594	3.68642	4.22932		73.6	2.06284	3.25233	2.67821
73.7	-48.0023	2.62691	7.72983		73.7	-8.20519	3.6103	4.15352		73.7	2.11287	3.30751	2.75262
73.8	-48.3985	2.42142	7.76456		73.8	-8.12508	3.475	4.16034		73.8	2.35336	3.49173	3.01207
73.9	-48.3359	2.54619	7.75969		73.9	-8.21303	3.81456	4.06081		73.9	2.29265	3.176	3.00912
74	-48.5386	2.66084	7.56587		74	-8.16186	3.74045	4.08157		74	2.31932	3.48393	2.80186
74.1	-48.5977	2.7835	7.49125		74.1	-8.22993	3.83042	4.17363		74.1	2.35198	3.3357	2.89309
74.2	-48.5232	2.62815	7.37942		74.2	-8.4559	3.98053	3.99175		74.2	2.51528	3.3631	2.86025
74.3	-48.4543	2.71326	7.64047		74.3	-8.42724	4.15592	3.75287		74.3	2.36412	3.2676	2.68374
74.4	-48.3448	2.99284	8.07651		74.4	-8.71616	3.7335	3.72285		74.4	2.09834	3.09886	2.6939
74.5	-48.1131	2.89434	8.34228		74.5	-8.84133	3.50495	4.03023		74.5	1.96765	3.18955	2.74713
74.6	-48.8516	3.02944	8.45037		74.6	-8.78254	3.68527	4.19158		74.6	1.86492	3.42193	2.87209
74.7	-48.9973	2.96108	8.66979		74.7	-8.77988	3.71527	4.14847		74.7	1.98016	3.57406	3.12097
74.8	-49.2354	2.89306	8.52767		74.8	-8.68916	3.85724	4.12145		74.8	1.9961	3.68219	2.82036
74.9	-49.3209	2.85986	8.22817		74.9	-8.99368	3.91913	4.211		74.9	2.11077	3.57966	2.89339
75	-49.3017	3.07495	8.05709		75	-8.92654	4.08653	4.0743		75	2.25019	3.77239	3.14011
75.1	-49.3818	3.06184	8.07592		75.1	-8.85032	3.92194	4.12244		75.1	2.02661	3.69601	3.21825
75.2	-49.0153	2.91861	8.13477		75.2	-8.62668	3.98069	4.05853		75.2	2.32933	3.55111	2.87825
75.3	-48.8546	2.51828	8.05932		75.3	-8.67361	3.94225	4.1051		75.3	2.26884	3.57349	2.90411
75.4	-48.9125	2.53594	7.92093		75.4	-8.76632	3.93724	3.93283		75.4	2.26244	3.53142	2.69992
75.5	-48.8843	2.71137	8.0818		75.5	-8.82704	3.71697	4.00597		75.5	2.4788	3.35132	2.66382
75.6	-48.7722	2.92514	8.16291		75.6	-9.10626	3.69807	3.85461		75.6	2.56419	3.14724	2.78542
75.7	-49.2234	2.86247	7.94786		75.7	-9.11508	3.63469	3.60958		75.7	2.41796	3.07718	2.58243
75.8	-49.3363	3.15889	8.11483		75.8	-9.12174	3.53348	3.86659		75.8	2.32122	3.23393	2.46165
75.9	-49.1599	2.92441	8.15668		75.9	-8.59718	3.66607	4.08329		75.9	2.48859	3.2827	2.39437
76	-49.1113	2.65867	8.11134		76	-8.47006	3.85273	4.10449		76	2.37027	3.26238	2.58039
76.1	-49.0351	2.65018	8.31513		76.1	-8.60364	3.91316	4.01464		76.1	2.42919	3.40339	2.72587
76.2	-49.1457	2.66573	8.31159		76.2	-8.663	3.79019	3.86023		76.2	2.54733	3.04156	2.82634
76.3	-48.8835	2.41788	8.30963		76.3	-8.83283	3.79946	3.71353		76.3	2.72197	3.11685	3.07982
76.4	-48.9813	2.26085	8.39671		76.4	-9.02253	3.65699	3.63725		76.4	2.59548	2.92295	2.98403
76.5	-48.9883	2.16947	8.30703		76.5	-8.96838	3.94647	3.76144		76.5	2.55273	3.03655	2.96354
76.6	-49.0579	2.264	8.36471		76.6	-9.05108	3.79065	3.70633		76.6	2.67173	3.1058	2.63503
76.7	-49.0536	2.62956	8.16822		76.7	-8.85286	3.93828	3.72996		76.7	2.34303	3.0651	2.49544
76.8	-49.0475	2.48373	8.21361		76.8	-8.97915	3.88771	4.0998		76.8	2.13013	3.33007	2.61757
76.9	-48.9364	2.39446	8.42286		76.9	-8.89034	4.10119	4.17531		76.9	2.09473	3.42128	2.84211
77	-48.7461	2.41917	8.20855		77	-8.79036	4.29342	4.29131		77	2.00814	3.35457	2.90127
77.1	-48.5543	2.48233	8.1885		77.1	-8.67325	4.19161	4.18907		77.1	2.07783	3.19792	3.04827
77.2	-48.5154	2.49953	8.39563		77.2	-8.69378	4.22206	3.99136		77.2	1.9795	3.13612	3.02617
77.3	-48.6236	2.35211	8.07939		77.3	-8.95121	4.47382	3.93155		77.3	1.95957	3.36494	2.88662
77.4	-48.2931	2.48431	7.98255		77.4	-9.12372	4.29701	3.85159		77.4	1.98132	3.53494	2.78672
77.5	-48.2677	2.39821	8.09365		77.5	-9.1608	3.98309	3.85915		77.5	2.03411	3.8811	2.72724
77.6	-48.069	2.3845	7.94976		77.6	-9.24531	3.84432	3.77628		77.6	2.13475	3.77651	2.68548
77.7	-48.2383	2.59071	7.95314		77.7	-8.98871	3.96345	3.83276		77.7	1.92988	3.69582	2.53503
77.8	-48.5141	2.60169	7.81137		77.8	-9.00677	4.0752	3.84058		77.8	2.20211	3.65067	2.61528
77.9	-48.6505	2.49061	7.83858		77.9	-8.69375	4.06921	4.01742		77.9	2.51067	3.34296	2.7966
78	-48.6509	2.49873	7.97833		78	-8.58321	4.13549	4.15322		78	2.981	3.41465	2.96809
78.1	-48.4723	2.494	8.15158		78.1	-8.80956	4.25663	3.93251		78.1	2.62683	3.42547	3.01676
78.2	-48.52	2.44251	8.31935		78.2	-8.73986	4.0157	3.79135		78.2	2.68086	3.23827	3.24244
78.3	-48.2839	2.39536	8.45666		78.3	-8.9572	3.96168	3.6611		78.3	2.73502	3.12629	3.13367
78.4	-48.2523	2.42719	8.43787		78.4	-8.97516	3.75123	3.75137		78.4	2.57171	3.05153	3.03664
78.5	-48.1015	2.76087	8.07129		78.5	-8.98072	3.81632	3.77934		78.5	2.49328	3.2159	2.74626
78.6	-48.0795	2.6361	8.18609		78.6	-8.94109	3.80541	3.90223		78.6	2.42576	3.21334	2.58146
78.7	-48.2375	2.5613	8.27121		78.7	-8.81113	3.5838	4.17511		78.7	2.49409	3.18225	2.6637
78.8	-48.3165	2.52496	8.24866		78.8	-8.92745	3.61378	4.16774		78.8	2.4364	3.21419	2.70895
78.9	-48.3802	2.3999	8.20023		78.9	-9.10476	3.59565	4.04364		78.9	2.62347	3.40279	2.72592
79	-48.3401	2.78185	7.96712		79	-8.97756	3.53065	3.96423		79	2.61312	3.52671	2.82149
79.1	-48.5049	3.08053	8.05052		79.1	-8.97855	3.2957	3.74492		79.1	2.51632	3.30161	2.65855
79.2	-48.4759	3.17718	7.97597		79.2	-8.68943	3.26914	3.61854		79.2	2.54064	2.98376	2.53118
79.3	-48.7407	3.09439	8.14105		79.3	-8.45849	3.44381	3.87293		79.3	2.34019	3.16053	2.67002
79.4	-48.5808	2.92963	8.09159		79.4	-8.5005	3.70735	4.00046		79.4	2.42679	3.24152	2.67336
79.5	-48.3451	2.69139	7.91726		79.5	-8.67506	3.72035	3.76902		79.5	2.38255	3.14904	2.8647
79.6	-48.4524	2.77743	7.64569		79.6	-8.80447	3.89636	3.90023		79.6	2.58115	3.2389	3.16788
79.7	-48.3315	2.7085	7.75483		79.7	-8.80039	3.91363	4.11011		79.7	2.61674	3.34995	3.52564
79.8	-48.3453	2.66601	7.7538		79.8	-8.5345	3.85528	4.16001		79.8	2.55627	3.09483	3.5179
79.9	-48.1622	2.83575	7.83926		79.9	-8.76814	3.96409	4.21775		79.9	2.45377	3.35461	3.59618
80	-48.3494	2.83191	8.03887		80	-8.61471	3.85225	4.09022		80	2.22872	3.27361	3.45863
80.1	-48.5618	2.84203	8.1751		80.1	-8.69033	3.5296	4.12083		80.1	1.98408	3.20546	3.20487
80.2	-48.4219	2.72144	7.97536		80.2	-8.80066	3.42817	3.9952		80.2	2.00844	3.31241	3.01697
80.3	-48.3999	2.61531	7.89608		80.3	-8.59678	3.52762	3.92183		80.3	2.01891	3.23158	2.9242
80.4	-48.1877	2.70767	8.01192		80.4	-9.05561	3.55822	3.85668		80.4	1.9598	3.52636	2.66678
80.5	-48.169	2.81093	8.04181		80.5	-8.59842	3.60483	3.78675		80.5	2.12548	3.80245	2.57937
80.6	-48.1048	2.59737	8.17721		80.6	-8.42571	3.53077	3.93374		80.6	2.18731	3.8682	2.73903
80.7	-48.3266	2.509	8.25603		80.7	-8.52053	3.64354	3.86718		80.7	2.4499	3.75578	2.93306
80.8	-48.2994	2.61038	8.18075		80.8	-8.67032	3.56484	4.28296		80.8	2.44564	3.82811	2.83967
80.9	-48.3511	2.52476	8.06354		80.9	-8.78926	3.63694	4.34358		80.9	2.21524	3.6641	2.98604
81	-48.297	2.36236	8.20346		81	-8.6104	3.33388	4.40234		81	2.40241	3.68674	3.05446
81.1	-48.1919	2.23325	8.21469		81.1	-8.65577	3.52568	4.5589		81.1	2.44733	3.63073	2.80609
81.2	-48.3573	2.19959	8.19193		81.2	-8.67522	3.59442	4.5588		81.2	2.47233	3.8402	2.77863
81.3	-48.4697	2.14476	7.94394		81.3	-8.37743	3.69127	4.58325		81.3	2.42662	3.7142	2.62786
81.4	-48.5245	1.96719	8.03523		81.4	-8.61875	3.80731	4.22951		81.4	2.36068	3.52826	2.77156
81.5	-48.6114	2.0797	8.02589		81.5	-8.68896	3.88113	4.18251		81.5	2.21129	3.44125	2.97083
81.6	-48.4449	2.00485	7.90074		81.6	-8.69143	4.15436	4.30125		81.6	2.28416	3.43531	2.98166
81.7	-48.4091	2.07616	8.16558		81.7	-8.79394	3.92845	4.17214		81.7	2.28298	3.26918	3.11922
81.8	-48.3522	2.06844	8.13641		81.8	-8.73799	3.93939	4.10523		81.8	2.13648	3.42725	2.97869
81.9	-48.5164	2.06949	8.0174		81.9	-8.63112	4.11873	3.85378		81.9	2.44105	3.39749	3.04429
82	-48.5055	2.32847	7.89203		82	-8.26971	3.89709	3.72849		82	2.42151	3.53045	3.06869
82.1	-48.4319	2.31643	7.89024		82.1	-8.42314	3.80916	3.63186		82.1	2.34729	3.53816	2.90581
82.2	-48.504	2.41707	7.81539		82.2	-8.62565	3.70194	3.73739		82.2	2.48768	3.39549	2.96024
82.3	-48.5417	2.38098	7.66896		82.3	-9.0706	3.6016	3.69544		82.3	2.67082	3.33524	3.06343
82.4	-48.5839	2.60153	7.79068		82.4	-8.66033	3.70207	3.80377		82.4	2.57981	3.14948	3.13892
82.5	-48.4142	2.80368	7.64782		82.5	-8.5541	3.58222	3.94793		82.5	2.85321	3.02379	3.04064
82.6	-48.3845	2.84835	7.76336		82.6	-8.84041	3.83786	3.78028		82.6	2.6113	3.10638	2.94902
82.7	-48.1424	2.8217	8.09958		82.7	-8.88819	3.75068	3.58766		82.7	2.45636	3.1126	3.07369
82.8	-48.1421	2.53357	8.20968		82.8	-8.48587	3.95217	3.48464		82.8	2.41722	3.1937	3.0286
82.9	-48.1401	2.74586	8.0284		82.9	-8.44961	3.8844	3.49864		82.9	2.26128	3.42801	2.91977
83	-48.0734	2.78957	7.95799		83	-8.3752	3.72172	3.35174		83	2.17446	3.56747	2.95182
83.1	-48.0533	2.89875	8.04446		83.1	-8.64975	3.72626	3.44981		83.1	2.15837	3.59698	3.01027
83.2	-48.1425	2.79819	7.87094		83.2	-8.9058	3.64515	3.45736		83.2	2.17962	3.23611	2.95475
83.3	-47.8325	2.62736	8.0533		83.3	-8.91141	3.29448	3.63395		83.3	2.21454	3.16597	2.96276
83.4	-47.5804	2.65934	7.9866		83.4	-8.82189	3.31333	3.82872		83.4	1.9389	3.33352	2.98089
83.5	-47.7798	2.88239	7.92084		83.5	-8.4596	3.37182	4.12291		83.5	2.18627	3.04507	2.7183
83.6	-47.7576	2.81149	7.87492		83.6	-8.48697	3.42976	4.00218		83.6	2.17665	3.1705	2.69703
83.7	-47.8477	2.87268	8.00749		83.7	-8.48755	3.51283	4.00971		83.7	2.27869	3.39816	2.57162
83.8	-47.9995	2.86579	8.13789		83.8	-8.50602	3.5895	4.02259		83.8	2.19575	3.36313	2.75229
83.9	-48.2682	2.84983	8.20869		83.9	-8.84967	3.80557	3.99082		83.9	2.07381	3.56385	2.61353
84	-48.1174	2.75734	7.99819		84	-9.2564	3.4706	3.80082		84	1.9886	3.48236	2.63658
84.1	-48.0536	2.94476	8.05818		84.1	-9.23217	3.46022	3.82367		84.1	1.69591	3.38497	2.8775
84.2	-47.7172	2.9598	8.00866		84.2	-9.16982	3.45028	3.83309		84.2	1.76055	3.22953	3.02358
84.3	-47.2076	2.90726	8.03789		84.3	-9.09143	3.57989	3.88137		84.3	1.57336	3.41466	2.92052
84.4	-47.4707	2.81886	7.87869		84.4	-9.00127	3.47757	4.03084		84.4	1.54803	3.24568	2.58666
84.5	-47.7927	2.79226	8.03351		84.5	-8.90022	3.62165	4.01174		84.5	1.78432	3.29588	2.57974
84.6	-47.9702	2.91036	7.90132		84.6	-9.00144	3.30682	4.09248		84.6	1.94426	3.5715	2.73938
84.7	-48.1309	2.72917	7.8506		84.7	-8.91658	3.15218	4.2566		84.7	2.04782	3.46562	2.44863
84.8	-48.3236	2.65283	7.64854		84.8	-8.76962	3.18988	4.3157		84.8	2.18537	3.49522	2.43109
84.9	-48.3368	2.61744	7.74127		84.9	-8.79765	3.12388	4.38909		84.9	2.33481	3.30649	2.59643
85	-48.1716	2.54932	7.6874		85	-9.09693	3.35787	4.15799		85	2.35238	3.41078	2.68467
85.1	-47.9654	2.36244	7.8259		85.1	-8.93391	3.30205	4.17417		85.1	2.19515	3.40543	2.74442
85.2	-47.8172	2.438	7.71628		85.2	-9.21273	3.18434	4.08094		85.2	2.25477	3.15885	2.81485
85.3	-47.8514	2.32125	7.68039		85.3	-9.00264	3.17334	4.1645		85.3	2.14637	3.12965	2.97206
85.4	-48.0594	2.51672	7.89901		85.4	-8.89362	3.33035	4.07526		85.4	2.20225	3.2991	2.96521
85.5	-48.4725	2.71004	7.94609		85.5	-9.03779	3.5165	4.08337		85.5	2.04688	3.3009	2.68278
85.6	-48.2621	2.7465	8.19706		85.6	-8.99755	3.60054	3.6879		85.6	2.03602	3.1849	2.57916
85.7	-48.0943	2.54792	8.26987		85.7	-8.84954	3.67465	3.36177		85.7	1.93501	3.48634	2.60639
85.8	-47.8351	2.52632	8.07209		85.8	-8.61566	3.64397	3.66444		85.8	2.03658	3.05114	2.86691
85.9	-47.6641	2.3577	7.73171		85.9	-8.28174	3.63617	3.7482		85.9	2.17998	3.13779	2.84432
86	-47.6489	2.33878	7.91446		86	-8.10827	3.45264	3.75106		86	2.26051	3.02353	2.6206
86.1	-47.4958	2.45587	7.86667		86.1	-8.31189	3.56489	3.63009		86.1	2.36749	3.37475	2.63143
86.2	-47.433	2.93997	7.94723		86.2	-8.45749	3.51771	3.74625		86.2	2.035	3.5554	2.9195
86.3	-47.3913	2.9603	7.8192		86.3	-8.45503	3.88024	3.78022		86.3	1.76817	3.30109	2.84528
86.4	-47.1466	2.98334	7.86038		86.4	-8.43569	3.76175	3.68497		86.4	1.50011	3.29941	2.84314
86.5	-46.9527	2.83516	7.78555		86.5	-8.20964	3.67031	3.60035		86.5	1.36112	3.26998	2.56465
86.6	-46.7992	2.897	7.79766		86.6	-8.48817	3.57003	3.46049		86.6	1.5134	3.30379	2.87876
86.7	-47.0423	2.8273	7.64355		86.7	-8.78785	3.76695	3.43582		86.7	1.73608	3.45102	2.78202
86.8	-47.0976	2.73666	7.92488		86.8	-8.61218	3.55357	3.4261		86.8	1.79893	3.46416	2.58486
86.9	-46.8587	2.7658	8.14945		86.9	-8.61807	3.38728	3.45616		86.9	1.65933	3.4472	2.38118
87	-47.1601	2.90244	8.02054		87	-8.43753	3.78372	3.6495		87	1.60363	3.66123	2.53053
87.1	-47.2385	2.87893	7.5089		87.1	-8.69745	3.64358	3.62039		87.1	1.66284	3.35487	2.56437
87.2	-47.4234	2.75046	7.80156		87.2	-8.87893	3.61776	3.62117		87.2	1.79152	3.4306	2.7011
87.3	-47.7151	2.94711	7.71378		87.3	-8.90626	3.565	3.58935		87.3	1.66866	3.0415	2.66702
87.4	-48.2835	2.9431	7.65054		87.4	-8.8275	3.61847	3.58534		87.4	1.77593	2.93075	2.64163
87.5	-48.2069	3.03595	7.76115		87.5	-8.68487	3.48955	3.84742		87.5	2.04285	2.90263	2.91885
87.6	-47.9281	3.27517	7.67377		87.6	-8.98157	3.55924	3.86741		87.6	2.18176	3.07906	2.77915
87.7	-48.0366	3.1147	7.76695		87.7	-9.06813	3.52798	3.84713		87.7	2.36106	3.36763	2.52888
87.8	-47.8085	2.81645	7.63834		87.8	-9.14021	3.49197	3.92339		87.8	2.16163	3.35531	2.57731
87.9	-47.6843	2.39076	7.73257		87.9	-9.24417	3.45803	3.99691		87.9	2.11949	3.39359	2.50472
88	-47.9078	2.31337	7.78144		88	-9.20016	3.61973	3.92713		88	2.03433	3.19939	2.53574
88.1	-47.968	2.29996	8.01176		88.1	-8.9677	3.47637	3.60457		88.1	1.90313	3.33853	2.6259
88.2	-47.4338	2.54574	8.00611		88.2	-8.85886	3.49258	3.40302		88.2	1.85957	3.17332	2.47714
88.3	-47.6552	2.73562	8.0576		88.3	-9.13469	3.55863	3.96121		88.3	1.97781	3.12856	2.45596
88.4	-47.7321	2.93488	8.01482		88.4	-9.16839	3.70662	3.86085		88.4	1.8672	3.02864	2.77713
88.5	-47.4912	2.89702	8.08323		88.5	-9.05912	3.65726	4.05339		88.5	1.98281	3.28003	2.7485
88.6	-47.6212	2.85566	8.31354		88.6	-9.13678	3.67897	3.92321		88.6	2.17694	3.19748	2.93172
88.7	-47.7022	2.77741	8.60973		88.7	-9.09468	3.57339	3.76953		88.7	2.26253	3.10723	2.9144
88.8	-47.7111	2.67279	8.56288		88.8	-9.18942	3.50318	3.86717		88.8	2.23075	2.95418	2.8799
88.9	-47.7387	2.43107	8.22845		88.9	-9.26813	3.68017	4.0734		88.9	2.31981	2.83728	2.79032
89	-47.3606	2.56191	8.20082		89	-9.20247	3.41771	4.17863		89	2.36225	2.91438	2.81375
89.1	-47.3121	2.49184	7.96563		89.1	-9.30364	3.29607	3.85854		89.1	2.23913	2.91618	2.95339
89.2	-47.1688	2.4964	8.06725		89.2	-8.87497	3.15215	3.66461		89.2	2.13672	3.16728	2.83456
89.3	-47.3552	2.73002	7.94917		89.3	-8.88216	3.11763	3.64529		89.3	2.16948	3.07954	3.06119
89.4	-47.3847	2.75072	7.94031		89.4	-8.93946	3.08466	3.57567		89.4	2.21509	3.23725	2.93397
89.5	-47.5535	2.93665	7.79088		89.5	-8.90231	3.42137	3.60525		89.5	2.07579	3.23696	2.93852
89.6	-47.7648	2.75214	7.8674		89.6	-8.61806	3.66224	3.69499		89.6	2.21766	3.3112	3.04799
89.7	-47.7043	2.80848	7.90224		89.7	-8.95486	3.35092	3.83346		89.7	2.26186	3.42985	3.02185
89.8	-47.5709	2.66993	8.05094		89.8	-8.91668	3.11757	3.88878		89.8	2.2188	3.12484	2.96507
89.9	-47.5426	2.52154	8.05051		89.9	-9.10178	3.35271	3.98148		89.9	2.54642	2.90454	3.07091
90	-47.4339	2.88207	7.83296		90	-8.98873	3.57375	4.11092		90	2.24624	2.96806	2.91819
90.1	-47.3598	3.12831	7.85794		90.1	-8.99641	3.74042	4.11815		90.1	2.1164	2.99281	3.0018
90.2	-47.561	3.26199	7.81745		90.2	-8.88597	3.69276	4.28009		90.2	1.75626	3.1349	2.71185
90.3	-47.2923	3.01824	8.10349		90.3	-8.54075	3.54705	3.97039		90.3	1.76995	3.22567	2.61278
90.4	-47.0348	2.98769	8.00929		90.4	-8.51564	3.66564	4.06745		90.4	1.80985	3.41122	2.57835
90.5	-47.0734	2.90217	7.98802		90.5	-8.85069	3.68442	3.85553		90.5	1.8974	3.40305	2.42095
90.6	-47.3323	2.73637	7.79262		90.6	-8.84584	3.45139	3.75851		90.6	1.79204	3.48791	2.4203
90.7	-47.2292	2.64957	7.72659		90.7	-8.79922	3.24393	3.78079		90.7	1.84074	3.21328	2.33575
90.8	-47.2801	2.84052	7.70371		90.8	-8.90734	3.20471	4.00256		90.8	1.94212	3.18408	2.74099
90.9	-47.4449	3.00561	7.49401		90.9	-8.61188	3.24573	4.20011		90.9	2.01516	3.30071	2.6451
91	-47.5234	3.08654	7.59079		91	-8.81822	3.54302	4.30919		91	1.79993	3.34397	2.90348
91.1	-47.2787	2.84564	7.57919		91.1	-8.661	3.74089	4.22433		91.1	1.76037	3.2019	2.91058
91.2	-47.0628	2.99014	7.73358		91.2	-8.67192	3.85532	4.26096		91.2	1.58354	3.12404	2.80256
91.3	-47.1209	2.9383	7.85528		91.3	-8.63813	4.02051	4.01021		91.3	1.73505	3.23053	2.53114
91.4	-47.3103	2.65307	8.05445		91.4	-8.51907	4.03616	4.19488		91.4	1.75571	3.15125	2.93109
91.5	-47.328	2.67448	7.99687		91.5	-8.61341	3.67365	4.30617		91.5	1.87594	3.4565	2.91719
91.6	-47.4772	2.58822	8.1103		91.6	-8.60945	3.47034	4.47732		91.6	1.76312	3.63506	2.95148
91.7	-47.9016	3.10017	8.10795		91.7	-8.6958	3.30414	4.64795		91.7	1.70068	3.42071	2.801
91.8	-47.9148	3.43076	8.1412		91.8	-8.77824	3.32184	4.63888		91.8	1.58954	3.47262	2.56254
91.9	-48.0814	3.1783	7.89407		91.9	-8.92249	3.14657	4.43279		91.9	1.45286	3.29004	2.51037
92	-48.0994	3.32811	8.13483		92	-8.86385	3.35291	4.37195		92	1.71935	2.78651	2.19944
92.1	-48.1473	3.36412	8.01803		92.1	-8.424	3.41855	4.18982		92.1	1.92666	2.95276	2.16619
92.2	-47.9241	3.30949	8.08205		92.2	-8.26996	3.66154	4.1077		92.2	2.00596	3.01899	2.42285
92.3	-47.8178	3.43611	7.95901		92.3	-8.43356	3.54563	3.89804		92.3	2.1944	3.03153	2.58822
92.4	-47.6689	3.50746	8.3202		92.4	-8.57249	3.57582	3.69868		92.4	2.01487	3.16511	2.82582
92.5	-47.572	3.23814	8.37532		92.5	-8.14894	3.44833	3.68102		92.5	1.78843	3.24838	2.92995
92.6	-47.5705	3.15787	8.30615		92.6	-8.34515	3.60791	3.50302		92.6	2.13882	3.28687	2.81178
92.7	-47.6172	3.07276	8.46449		92.7	-8.27094	3.65739	3.43797		92.7	2.06213	3.1982	2.74225
92.8	-47.7223	3.09892	8.62987		92.8	-8.55819	3.61794	3.43473		92.8	1.93707	3.22817	2.69819
92.9	-47.7033	3.07413	8.53103		92.9	-8.76794	3.5689	3.23773		92.9	2.10709	3.2938	2.88647
93	-47.7435	3.03896	8.49568		93	-8.89754	3.45689	3.36361		93	2.09799	3.25195	2.85081
93.1	-47.8114	3.11256	8.11035		93.1	-8.78465	3.26898	3.41441		93.1	1.98475	3.35309	2.76168
93.2	-47.7795	3.10123	8.16583		93.2	-8.40247	3.35617	3.52723		93.2	2.11308	3.14656	2.8224
93.3	-47.4521	2.96722	8.12603		93.3	-8.17184	3.48612	3.71413		93.3	1.92838	2.90869	2.94826
93.4	-47.5382	2.9099	8.28139		93.4	-8.29623	3.46162	3.83966		93.4	1.82092	2.75888	2.81609
93.5	-47.5643	2.92076	8.16005		93.5	-8.25456	3.7249	3.84342		93.5	1.81009	2.77077	2.67679
93.6	-47.6976	2.83859	8.24233		93.6	-8.25913	3.93406	3.87259		93.6	1.52805	2.7633	2.75174
93.7	-47.9396	2.7399	8.47764		93.7	-8.19488	3.78076	3.97374		93.7	1.55765	3.14468	2.54872
93.8	-47.9972	2.8478	8.48132		93.8	-8.53908	3.80468	3.72251		93.8	1.52646	3.04946	2.64395
93.9	-47.9109	2.83865	8.34836		93.9	-8.84839	3.89387	3.64304		93.9	1.64701	3.33334	2.73674
94	-47.7709	3.11658	8.15016		94	-8.82189	3.79436	4.00715		94	1.70774	3.42304	2.63206
94.1	-47.7588	3.20867	8.20117		94.1	-8.64775	3.6482	4.13467		94.1	1.75962	3.36092	2.80637
94.2	-47.9046	3.2449	8.16082		94.2	-8.8416	3.53187	3.8371		94.2	1.86369	3.282	2.92338
94.3	-48	3.46298	8.32978		94.3	-8.98047	3.47148	3.64857		94.3	1.96932	3.44931	2.79308
94.4	-48.2265	3.58783	8.07085		94.4	-9.0664	3.37881	3.46175		94.4	1.92009	3.34115	2.88191
94.5	-48.462	3.64066	8.02142		94.5	-8.81996	3.41888	3.76661		94.5	1.98806	3.38883	2.76382
94.6	-48.1817	3.71735	8.06818		94.6	-8.76972	3.36449	3.94558		94.6	2.05153	3.39391	2.6666
94.7	-48.2635	3.46396	8.42283		94.7	-8.5052	3.32218	3.83783		94.7	1.93326	3.52512	2.57773
94.8	-48.2108	3.68175	8.37209		94.8	-8.59146	3.39049	3.74132		94.8	2.02634	3.17622	2.86908
94.9	-47.8864	3.27198	8.20814		94.9	-8.70614	3.47469	3.61791		94.9	2.15162	3.40417	2.84637
95	-47.8429	3.17809	8.06792		95	-8.68832	3.82072	3.76681		95	2.02146	3.45868	2.69532
95.1	-47.6925	2.91539	8.19628		95.1	-8.70877	3.5429	3.97657		95.1	1.99243	3.52153	2.70453
95.2	-47.5145	2.9136	8.12475		95.2	-8.80412	3.67438	3.93489		95.2	1.89391	3.52851	2.55823
95.3	-47.6173	3.04197	8.15595		95.3	-9.06522	3.31792	3.80011		95.3	2.12364	3.35342	2.49762
95.4	-47.7272	3.20146	8.28611		95.4	-8.99027	3.03448	3.8082		95.4	2.07135	3.19407	2.29771
95.5	-47.7166	3.10605	8.3585		95.5	-9.11401	3.31146	3.78043		95.5	2.15724	3.43174	2.24655
95.6	-47.6806	3.20185	8.58129		95.6	-9.00099	3.16183	4.12452		95.6	2.23101	3.37794	2.19897
95.7	-47.9398	3.10449	8.2465		95.7	-9.11925	3.29458	4.16722		95.7	2.26474	3.52358	2.27662
95.8	-47.8463	3.01518	8.18822		95.8	-9.24564	3.38576	3.92687		95.8	2.33615	3.5103	2.49067
95.9	-47.7361	2.72856	8.27685		95.9	-9.26052	3.55578	4.07384		95.9	2.20642	3.41131	2.67201
96	-47.4802	2.58368	8.33332		96	-9.61317	3.58871	3.96597		96	2.55926	3.29425	2.70989
96.1	-47.4423	2.4513	8.34872		96.1	-9.70216	3.58379	4.01508		96.1	2.38676	3.26523	2.51107
96.2	-47.5091	2.62707	8.37791		96.2	-9.44353	3.67092	4.04802		96.2	2.23717	3.23894	2.55714
96.3	-47.7253	2.63516	8.69879		96.3	-9.16695	3.47488	4.11821		96.3	2.09384	3.12649	2.5591
96.4	-47.5824	3.03332	8.53588		96.4	-9.08316	3.50317	4.42933		96.4	1.77379	3.01315	2.63664
96.5	-47.5137	3.04226	8.47403		96.5	-9.04871	3.56069	4.27972		96.5	1.98324	2.93794	2.6822
96.6	-47.4866	3.49919	8.59433		96.6	-8.91278	3.75256	4.06097		96.6	2.12148	2.93903	2.96302
96.7	-47.8922	3.60641	8.43579		96.7	-8.95496	3.42685	4.14541		96.7	1.96403	3.01672	2.74864
96.8	-47.8827	3.65926	8.33982		96.8	-8.8854	3.14569	3.75991		96.8	1.88695	2.89941	2.71515
96.9	-48.1009	3.68042	8.0137		96.9	-9.04836	3.13768	3.74115		96.9	1.92907	2.93143	2.87772
97	-47.7477	3.57755	7.98075		97	-9.14158	3.1554	3.76267		97	1.91924	3.11062	2.66688
97.1	-47.4643	3.41453	7.77419		97.1	-8.80721	3.42411	3.99708		97.1	2.0539	2.93897	2.50866
97.2	-47.1017	3.15437	7.76019		97.2	-8.85983	3.18146	4.03721		97.2	2.15268	3.21103	2.72122
97.3	-46.9219	2.97212	7.82235		97.3	-9.03565	3.32004	3.79175		97.3	2.22777	3.48328	2.69047
97.4	-47.2554	2.83836	8.00244		97.4	-8.83282	3.25315	3.52648		97.4	2.00768	3.34247	2.67139
97.5	-47.3577	2.84794	8.26594		97.5	-8.81204	3.58123	3.50365		97.5	1.71622	3.31598	2.76728
97.6	-47.5933	2.85267	8.28473		97.6	-8.95992	3.33107	3.43575		97.6	1.75505	3.2792	2.98819
97.7	-47.7601	2.88872	8.2126		97.7	-8.65545	3.52933	3.49798		97.7	1.67381	3.52693	2.81273
97.8	-47.7282	2.90944	8.14425		97.8	-8.7183	3.60962	3.59531		97.8	1.92977	3.44043	2.84675
97.9	-47.7595	2.84721	7.96756		97.9	-8.66161	3.5284	3.82003		97.9	2.08334	3.43038	2.77667
98	-47.9691	2.92125	7.89653		98	-8.50416	3.48747	3.76333		98	1.9977	3.68808	2.78231
98.1	-47.9524	3.13038	7.89056		98.1	-8.67073	3.37786	3.58367		98.1	2.08938	3.60527	2.86071
98.2	-47.7966	3.29546	7.67767		98.2	-8.81256	3.33544	3.76921		98.2	2.04542	3.47945	2.96716
98.3	-47.762	3.07648	7.84702		98.3	-8.57994	3.14314	3.94169		98.3	2.10739	3.31472	3.07707
98.4	-47.5837	2.78571	7.97374		98.4	-8.65189	3.3615	3.93246		98.4	2.20945	3.19477	2.92375
98.5	-47.2152	2.83166	8.20969		98.5	-8.74098	3.24738	3.82447		98.5	2.43715	3.14144	2.73541
98.6	-47.2754	2.78108	8.11821		98.6	-8.88399	3.12743	3.84099		98.6	2.18747	3.1374	2.75286
98.7	-47.2578	2.71523	8.23679		98.7	-8.67237	3.24437	3.97091		98.7	2.23259	3.00227	2.61321
98.8	-47.2082	2.61773	8.16588		98.8	-8.72952	3.39766	3.82963		98.8	2.14757	3.08448	2.66665
98.9	-46.9535	2.69057	8.0353		98.9	-8.83484	3.5781	3.6517		98.9	2.16536	2.93422	2.76373
99	-46.9305	2.66441	7.82753		99	-9.13692	3.56989	3.39014		99	2.03293	2.64035	2.73307
99.1	-47.6055	2.13842	7.53953		99.1	-9.21051	3.23856	3.22466		99.1	1.53139	2.42971	2.52026
99.2	-49.1338	0.699633	5.94302		99.2	-10.3672	1.85949	1.94305		99.2	0.338415	1.73573	1.46797
99.3	-53.4019	-3.57811	1.83662		99.3	-13.6798	-1.64067	-1.83252		99.3	-3.07257	-1.52222	-1.63428
99.4	-64.4564	-14.5984	-9.43534		99.4	-23.1189	-11.1336	-10.9316		99.4	-11.5198	-9.67861	-9.87735
99.5	-90.5517	-40.0667	-34.721		99.5	-44.1562	-32.1109	-31.3796		99.5	-29.4546	-27.2649	-27.5777
99.6	-141.548	-90.5396	-84.2454		99.6	-84.7949	-71.9759	-70.4441		99.6	-63.8459	-61.702	-60.896
99.7	-227.086	-174.652	-167.255		99.7	-151.964	-137.879	-134.971		99.7	-119.976	-116.821	-115.295
99.8	-349.53	-294.737	-285.988		99.8	-245.654	-229.838	-225.448		99.8	-197.957	-192.836	-189.886
99.9	-496.055	-438.407	-427.883		99.9	-355.831	-337.136	-330.962		99.9	-287.363	-279.81	-275.553
100	-638.375	-578.005	-566.013		100	-460.078	-438.487	-430.725		100	-370.714	-360.123	-354.391
100.1	-653.616	-591.052	-578.381		100.1	-444.928	-420.202	-411.799		100.1	-340.173	-326.946	-320.503
100.2	-444.165	-389.915	-384.092		100.2	-295.45	-275.004	-272.291		100.2	-225.454	-214.707	-212.582
100.3	-324.361	-282.132	-279.228		100.3	-215.909	-199.959	-199.087		100.3	-165.015	-156.751	-155.857
100.4	-245.298	-213.386	-211.465		100.4	-163.791	-151.531	-150.898		100.4	-125.084	-118.572	-118.56
100.5	-187.245	-163.371	-161.715		100.5	-125.384	-115.731	-115.286		100.5	-95.4156	-90.562	-90.4802
100.6	-142.778	-125.024	-123.776		100.6	-95.6085	-88.3348	-88.2215		100.6	-72.6151	-68.8568	-69.1943
100.7	-109.287	-96.3131	-95.198		100.7	-73.2927	-68.0648	-67.7126		100.7	-55.7392	-52.6758	-52.8844
100.8	-84.3487	-74.9216	-73.9498		100.8	-56.7502	-53.1052	-52.462		100.8	-43.2366	-40.6961	-40.751
100.9	-65.9793	-58.868	-57.9638		100.9	-44.4961	-41.8475	-41.2394		100.9	-33.6897	-31.6841	-31.7927
101	-52.4004	-47.0921	-46.4739		101	-35.576	-33.5031	-33.1221		101	-26.7212	-25.3582	-25.1797
101.1	-42.5175	-38.9283	-38.2336		101.1	-28.9068	-27.6533	-27.0789		101.1	-21.6349	-20.7481	-20.3831
101.2	-35.4399	-32.8966	-32.4097		101.2	-23.9677	-23.0444	-22.8867		101.2	-17.8714	-17.3285	-17.1344
101.3	-30.4984	-28.2784	-28.0431		101.3	-20.6217	-19.6839	-19.3244		101.3	-15.1104	-14.6921	-14.6635
101.4	-26.6555	-24.7918	-24.6607		101.4	-18.0997	-17.5584	-17.0043		101.4	-13.0048	-12.7116	-12.6957
101.5	-23.7141	-22.3777	-22.1843		101.5	-16.326	-15.7071	-15.2563		101.5	-11.5881	-11.575	-11.4244
101.6	-21.821	-20.5447	-20.3459		101.6	-14.7293	-14.1748	-13.9939		101.6	-10.9268	-10.6616	-10.4025
101.7	-20.3115	-19.46	-19.0585		101.7	-13.6963	-13.3311	-13.0552		101.7	-10.1655	-10.0558	-9.58843
101.8	-19.1605	-18.3943	-17.9834		101.8	-13.1104	-12.6972	-12.3745		101.8	-9.3984	-9.62015	-9.23167
101.9	-18.4087	-17.7981	-17.0498		101.9	-12.4687	-12.0171	-11.9449		101.9	-8.88855	-9.03748	-8.85083
102	-18.0384	-17.22	-16.3554		102	-12.0187	-11.6368	-11.7615		102	-8.62074	-8.80539	-8.73086
102.1	-17.807	-16.8329	-16.1098		102.1	-11.4734	-11.244	-11.5847		102.1	-7.96309	-8.57057	-8.47301
102.2	-17.4235	-16.5247	-15.7942		102.2	-11.257	-11.1168	-11.3688		102.2	-7.88385	-8.24334	-8.16304
102.3	-16.9961	-16.2294	-15.4974		102.3	-11.1131	-10.6887	-11.0266		102.3	-7.7749	-8.031	-8.11939
102.4	-16.8375	-16.1944	-15.4876		102.4	-11.1772	-10.5362	-10.9453		102.4	-7.85961	-7.88823	-8.0234
102.5	-16.6326	-15.8518	-15.3606		102.5	-11.1881	-10.5137	-10.4517		102.5	-7.95683	-7.82596	-7.76557
102.6	-16.4229	-15.6622	-15.3031		102.6	-11.1493	-10.3974	-10.5297		102.6	-7.93586	-7.78642	-7.94464
102.7	-15.928	-15.3674	-14.8056		102.7	-11.0225	-10.4088	-10.2265		102.7	-7.83233	-7.85349	-7.30358
102.8	-15.6452	-14.8996	-14.5114		102.8	-10.6721	-9.96697	-10.0841		102.8	-7.5541	-7.66011	-7.01252
102.9	-15.1198	-14.6063	-14.3942		102.9	-10.6922	-9.93033	-10.0788		102.9	-7.36557	-7.28952	-6.82624
103	-14.8846	-14.2673	-14.3021		103	-10.4986	-9.70734	-10.1993		103	-7.21241	-6.78393	-6.7775
103.1	-14.6253	-14.1691	-14.0337		103.1	-10.5041	-9.79283	-10.1621		103.1	-7.36252	-6.51222	-6.71235
103.2	-14.8513	-14.0909	-13.9566		103.2	-10.1684	-9.44504	-10.0452		103.2	-7.149	-6.58172	-6.79324
103.3	-14.6311	-14.033	-14.0736		103.3	-9.8526	-9.37936	-9.84679		103.3	-6.91069	-6.58563	-6.70246
103.4	-14.4238	-13.6396	-13.9738		103.4	-9.72963	-9.11194	-9.32906		103.4	-6.89106	-6.52995	-6.75478
103.5	-14.1966	-13.4311	-14.1058		103.5	-9.69878	-9.08245	-9.01466		103.5	-6.6919	-6.43038	-6.49551
103.6	-13.8026	-13.3631	-13.9097		103.6	-9.41774	-9.236	-9.16144		103.6	-6.4971	-6.11771	-6.54017
103.7	-13.5324	-13.1261	-13.7789		103.7	-9.40914	-9.2983	-9.05828		103.7	-6.08812	-5.96663	-6.55952
103.8	-13.3462	-13.0272	-13.3798		103.8	-9.09627	-9.00453	-8.90111		103.8	-6.26144	-6.15703	-6.37384
103.9	-13.016	-12.8625	-13.1963		103.9	-9.10262	-8.50107	-8.93107		103.9	-6.3882	-6.14513	-5.99746
104	-12.9338	-12.5277	-12.8695		104	-8.78342	-8.27036	-9.08236		104	-5.92455	-6.36156	-5.6516
104.1	-12.8267	-12.3614	-12.391		104.1	-8.76322	-8.06757	-9.01775		104.1	-5.94912	-6.33679	-5.61898
104.2	-12.823	-12.0951	-12.3219		104.2	-8.9698	-8.18799	-8.77829		104.2	-5.94647	-5.96872	-5.74761
104.3	-12.833	-11.9598	-12.1372		104.3	-8.69936	-8.21086	-8.72352		104.3	-6.06408	-6.25492	-5.66841
104.4	-12.5443	-11.9836	-12.1323		104.4	-8.48908	-8.36136	-8.49909		104.4	-5.8557	-6.19067	-5.8852
104.5	-12.3853	-11.9716	-11.9865		104.5	-8.50361	-8.34367	-8.4093		104.5	-6.1797	-6.00245	-5.97489
104.6	-12.2383	-12.0999	-12.177		104.6	-8.40558	-8.20575	-8.21119		104.6	-6.46647	-5.89833	-6.04408
104.7	-12.2218	-11.9099	-11.8906		104.7	-8.17407	-8.18363	-8.27729		104.7	-6.23739	-5.94075	-6.09752
104.8	-12.2416	-12.2056	-11.928		104.8	-8.08059	-7.73064	-8.06319		104.8	-5.92739	-5.96228	-5.86333
104.9	-12.3422	-12.014	-11.7563		104.9	-8.17722	-7.74119	-8.1674		104.9	-5.76467	-5.63207	-5.59456
105	-12.2513	-11.8751	-11.6827		105	-8.23593	-7.57	-7.97438		105	-5.84587	-5.70801	-5.74319
105.1	-12.0176	-11.8261	-11.6807		105.1	-8.1254	-7.67073	-7.8291		105.1	-5.82809	-5.67031	-5.69526
105.2	-11.9926	-11.5981	-11.3835		105.2	-7.9841	-7.77093	-7.80884		105.2	-5.4501	-5.80561	-5.45858
105.3	-11.7872	-11.3159	-11.193		105.3	-8.16851	-7.5783	-7.51136		105.3	-5.43998	-5.93044	-5.48582
105.4	-11.6622	-11.0803	-11.1266		105.4	-7.87249	-7.47166	-7.51626		105.4	-5.39029	-5.78897	-5.26886
105.5	-11.4536	-10.9498	-10.9243		105.5	-7.87478	-7.44655	-7.61009		105.5	-5.38884	-5.66566	-5.4482
105.6	-11.2236	-10.8852	-10.8868		105.6	-7.71196	-7.20053	-7.54365		105.6	-5.45934	-5.71697	-5.51027
105.7	-11.261	-10.6556	-10.8875		105.7	-7.72549	-7.11302	-7.48584		105.7	-5.59361	-5.61051	-5.72094
105.8	-11.2879	-10.6151	-10.8114		105.8	-7.75609	-7.16395	-7.07222		105.8	-5.4287	-5.50281	-5.70386
105.9	-11.4437	-10.6575	-10.7912		105.9	-7.54814	-7.04363	-7.02477		105.9	-5.5336	-5.48569	-5.4647
106	-11.4676	-10.7405	-10.797		106	-7.10176	-6.94201	-7.00968		106	-5.38666	-5.57059	-5.08192
106.1	-11.0485	-10.8874	-10.7817		106.1	-7.03863	-7.02321	-6.88295		106.1	-5.3951	-5.48221	-4.78098
106.2	-10.9328	-11.0091	-10.7642		106.2	-7.06743	-6.86371	-6.94189		106.2	-4.92558	-5.31709	-4.83887
106.3	-10.7133	-10.6764	-10.441		106.3	-7.18083	-6.80315	-6.81691		106.3	-4.8894	-4.91139	-4.82728
106.4	-10.7573	-10.3945	-10.5301		106.4	-7.01335	-6.67851	-6.89284		106.4	-4.74826	-4.91512	-4.80465
106.5	-10.3819	-10.365	-10.3416		106.5	-7.11761	-6.84518	-6.95136		106.5	-4.95247	-4.79357	-4.59098
106.6	-10.4656	-10.1334	-10.3216		106.6	-7.00815	-6.74551	-6.8546		106.6	-4.83908	-4.74414	-4.48772
106.7	-10.5363	-10.2579	-10.0494		106.7	-6.67628	-6.61894	-6.79843		106.7	-4.90707	-4.8379	-4.39311
106.8	-10.5832	-10.1604	-9.69658		106.8	-6.67134	-6.73711	-6.58901		106.8	-4.92596	-5.1266	-4.38054
106.9	-10.3805	-9.85458	-9.64576		106.9	-6.60747	-6.38231	-6.36382		106.9	-4.86771	-5.18691	-4.55729
107	-10.1164	-9.85981	-9.72073		107	-6.55311	-6.5427	-6.23505		107	-4.85805	-4.91265	-4.59433
107.1	-9.95341	-9.78316	-9.51098		107.1	-6.36228	-6.57179	-6.19953		107.1	-5.12823	-4.54658	-4.46871
107.2	-9.78714	-9.81454	-9.55532		107.2	-6.53765	-6.63669	-6.55013		107.2	-5.103	-4.48976	-4.48839
107.3	-9.84537	-9.90424	-9.54529		107.3	-6.53355	-6.66486	-6.73074		107.3	-5.11405	-4.5172	-4.5449
107.4	-9.72484	-9.70641	-9.42576		107.4	-6.48831	-6.55917	-6.63487		107.4	-5.17202	-4.51892	-4.62492
107.5	-9.35516	-9.67425	-9.52242		107.5	-6.70048	-6.51085	-6.31298		107.5	-5.02997	-4.46346	-4.60133
107.6	-9.11178	-9.54641	-9.35726		107.6	-6.56669	-6.45794	-6.26341		107.6	-4.78188	-4.32024	-4.72372
107.7	-9.33542	-9.36968	-9.42508		107.7	-6.38863	-6.41639	-6.14999		107.7	-4.80195	-4.42042	-4.60581
107.8	-9.53182	-9.53637	-9.1903		107.8	-6.53841	-6.43528	-6.01003		107.8	-4.48362	-4.34309	-4.62412
107.9	-9.47548	-9.33446	-9.08074		107.9	-6.35456	-6.49821	-5.83912		107.9	-4.46937	-4.36791	-4.51045
108	-9.48561	-9.13679	-9.24618		108	-6.29136	-6.48139	-5.99051		108	-4.28141	-4.46302	-4.39872
108.1	-9.3582	-8.93528	-9.39324		108.1	-6.30073	-6.19245	-6.29913		108.1	-4.32276	-4.28044	-4.48117
108.2	-9.133	-8.65746	-9.26038		108.2	-6.35687	-6.1463	-6.33991		108.2	-4.24329	-4.47963	-4.43808
108.3	-9.06586	-8.59239	-9.19828		108.3	-6.42855	-6.31509	-6.1101		108.3	-4.50957	-4.49439	-4.52884
108.4	-9.17064	-8.72305	-9.10549		108.4	-6.07668	-6.16737	-5.83754		108.4	-4.58005	-4.27728	-4.41005
108.5	-9.01797	-8.70724	-9.07349		108.5	-5.91018	-6.23601	-5.89714		108.5	-4.96997	-4.09724	-4.35892
108.6	-8.90754	-8.91926	-8.96717		108.6	-5.78163	-6.24768	-5.89765		108.6	-4.70846	-4.13088	-4.24175
108.7	-8.84078	-8.78312	-8.63274		108.7	-5.62324	-6.26771	-5.86092		108.7	-4.43851	-4.20334	-4.36824
108.8	-8.74506	-8.65231	-8.59393		108.8	-5.53484	-5.99858	-5.87232		108.8	-4.30649	-4.26002	-4.28574
108.9	-8.62557	-8.37089	-8.45383		108.9	-5.56915	-5.77312	-5.83252		108.9	-4.33654	-4.47434	-4.3022
109	-8.73106	-8.35933	-8.37776		109	-5.60027	-5.57271	-6.16064		109	-4.0746	-4.40996	-4.22189
109.1	-8.42522	-8.31475	-8.02499		109.1	-5.51215	-5.51725	-6.06237		109.1	-3.91929	-4.1361	-4.37146
109.2	-8.4783	-8.14824	-7.93749		109.2	-5.77805	-5.2753	-6.1431		109.2	-3.98179	-3.91261	-4.28644
109.3	-8.30938	-8.54416	-7.96601		109.3	-5.87144	-5.41735	-6.04533		109.3	-4.08597	-4.1086	-4.51941
109.4	-8.56797	-8.45373	-7.88538		109.4	-5.84119	-5.48278	-6.00036		109.4	-4.03675	-4.24559	-4.34116
109.5	-8.34488	-8.45019	-7.77174		109.5	-5.82678	-5.52067	-5.99462		109.5	-3.97315	-4.05961	-4.35348
109.6	-8.12197	-8.19851	-7.75815		109.6	-5.67535	-5.58392	-5.72182		109.6	-3.98589	-4.10542	-4.2733
109.7	-7.99823	-8.13794	-7.74476		109.7	-5.61928	-5.62898	-5.80186		109.7	-4.01092	-4.09383	-4.22407
109.8	-8.11097	-8.06536	-7.82384		109.8	-5.69368	-5.96384	-5.74951		109.8	-4.23909	-4.18028	-3.97522
109.9	-8.24982	-7.82172	-8.0229		109.9	-5.80441	-5.89141	-5.71284		109.9	-4.36943	-4.35327	-4.04058
110	-8.28007	-8.08423	-8.00039		110	-5.92366	-5.66605	-5.60715		110	-4.20291	-4.46842	-3.85805
110.1	-8.27659	-8.17605	-8.07032		110.1	-5.83435	-5.49202	-5.36182		110.1	-4.26734	-4.28365	-3.78742
110.2	-8.0709	-8.17544	-7.95654		110.2	-5.57456	-5.44975	-5.20178		110.2	-4.20137	-4.0289	-4.08161
110.3	-8.19951	-8.08554	-8.0363		110.3	-5.25469	-5.47444	-5.22627		110.3	-4.07332	-3.78303	-4.12456
110.4	-8.21351	-8.07369	-7.90994		110.4	-5.37385	-5.4861	-5.07031		110.4	-3.96338	-3.75854	-4.3482
110.5	-8.20173	-8.0029	-7.69071		110.5	-5.21222	-5.43137	-5.37193		110.5	-3.95121	-3.71526	-4.17541
110.6	-8.00249	-8.03815	-7.71141		110.6	-5.08865	-5.37976	-5.46077		110.6	-3.91931	-3.809	-4.08454
110.7	-7.85448	-7.82877	-7.63286		110.7	-5.29219	-4.92934	-5.37728		110.7	-3.81586	-3.53355	-4.04808
110.8	-7.88322	-7.76731	-7.57024		110.8	-5.16265	-4.87168	-5.36204		110.8	-4.0803	-3.45294	-3.83701
110.9	-7.37974	-7.75215	-7.70702		110.9	-5.0543	-4.81064	-5.21305		110.9	-3.90583	-3.65858	-3.92881
111	-7.41534	-7.71111	-7.6322		111	-5.05194	-4.92605	-5.0179		111	-3.95451	-3.79793	-3.69286
111.1	-7.45536	-7.54965	-7.44859		111.1	-5.14502	-5.00941	-5.18605		111.1	-3.69306	-3.66843	-3.41199
111.2	-7.50846	-7.62644	-7.25626		111.2	-5.24108	-4.86957	-5.09901		111.2	-3.89345	-3.60135	-3.3961
111.3	-7.28074	-7.34596	-6.9513		111.3	-5.00846	-4.86122	-5.34704		111.3	-3.86044	-3.48432	-3.51809
111.4	-7.48946	-7.37834	-6.99878		111.4	-4.99733	-4.69931	-5.60825		111.4	-3.77202	-3.52648	-3.81503
111.5	-7.2199	-7.31578	-6.98885		111.5	-4.96689	-4.84752	-5.42796		111.5	-3.83262	-3.64125	-3.99917
111.6	-7.25351	-7.12926	-6.9329		111.6	-5.27229	-5.23294	-5.52681		111.6	-3.88961	-3.51216	-3.7761
111.7	-7.25951	-6.98491	-6.97668		111.7	-5.38008	-5.26165	-5.36889		111.7	-3.48294	-3.54201	-3.69921
111.8	-7.3042	-6.9331	-7.27389		111.8	-5.31725	-4.94615	-5.28411		111.8	-3.32248	-3.83693	-3.37341
111.9	-7.37186	-6.93865	-7.13378		111.9	-5.11987	-4.85937	-5.08484		111.9	-3.04334	-3.63047	-3.42081
112	-7.33077	-7.14066	-7.22589		112	-4.82925	-4.91291	-5.12966		112	-3.26676	-3.60353	-3.43651
112.1	-7.43566	-7.20477	-7.30232		112.1	-4.83328	-5.03315	-5.16318		112.1	-3.34722	-3.58984	-3.4881
112.2	-7.38439	-7.16741	-7.161		112.2	-4.92522	-4.9533	-5.08508		112.2	-3.41974	-3.66895	-3.67063
112.3	-7.09192	-7.2113	-7.33554		112.3	-4.82716	-5.0231	-5.03554		112.3	-3.42096	-3.54483	-3.51413
112.4	-7.03993	-7.23737	-7.2758		112.4	-4.78682	-5.16191	-4.93198		112.4	-3.55331	-3.31468	-3.49901
112.5	-7.01779	-7.11486	-7.21429		112.5	-4.76358	-4.98543	-4.93755		112.5	-3.4931	-3.22234	-3.51349
112.6	-6.75577	-6.97426	-7.45133		112.6	-4.48408	-4.91846	-4.97157		112.6	-3.78737	-3.16286	-3.6373
112.7	-6.63249	-7.12387	-7.35096		112.7	-4.60088	-5.17095	-4.84323		112.7	-3.73599	-3.53783	-3.56695
112.8	-6.70545	-7.0973	-7.3198		112.8	-4.47089	-5.11576	-5.0791		112.8	-3.86939	-3.51819	-3.41589
112.9	-6.68058	-7.01813	-7.05361		112.9	-4.56333	-4.8934	-5.03674		112.9	-3.81718	-3.42893	-3.27515
113	-6.56003	-6.81931	-7.09277		113	-4.66573	-4.81989	-4.94719		113	-3.50384	-3.68061	-3.44525
113.1	-6.98666	-6.76459	-7.14102		113.1	-4.7143	-4.40461	-4.86918		113.1	-3.46625	-3.46175	-3.54347
113.2	-7.11458	-6.73205	-6.96935		113.2	-4.77382	-4.26426	-4.82244		113.2	-3.32677	-3.30019	-3.52871
113.3	-6.83269	-6.60377	-6.805		113.3	-4.67774	-4.60721	-4.90704		113.3	-3.28673	-3.28162	-3.555
113.4	-6.75866	-6.745	-6.61079		113.4	-4.56264	-4.70522	-4.93108		113.4	-3.28511	-3.2428	-3.62331
113.5	-6.61542	-6.46629	-6.67516		113.5	-4.34833	-4.59951	-4.80481		113.5	-3.17742	-3.041	-3.61279
113.6	-6.50279	-6.62654	-6.73043		113.6	-4.41966	-4.36457	-5.28487		113.6	-3.08314	-3.10225	-3.54949
113.7	-6.54247	-6.37719	-6.78809		113.7	-4.15857	-4.44939	-5.18109		113.7	-3.0009	-3.04832	-3.46938
113.8	-6.49581	-6.40271	-6.69862		113.8	-4.13582	-4.50647	-4.9877		113.8	-3.02467	-2.76949	-3.54306
113.9	-6.5433	-6.48898	-6.36951		113.9	-4.0758	-4.61752	-4.94865		113.9	-3.32921	-2.74465	-3.5473
114	-6.32834	-6.29061	-6.4503		114	-4.34371	-4.94746	-4.90758		114	-3.28104	-2.71687	-3.41095
114.1	-6.38222	-6.35516	-6.51974		114.1	-4.49739	-4.89108	-4.97101		114.1	-3.40405	-3.07233	-3.40564
114.2	-6.56857	-6.28905	-6.41661		114.2	-4.58633	-4.77911	-4.98863		114.2	-3.13506	-2.984	-3.3602
114.3	-6.38072	-6.48431	-6.40691		114.3	-4.34896	-4.57039	-4.71004		114.3	-3.21201	-3.0235	-3.0437
114.4	-6.50213	-6.4564	-6.50111		114.4	-4.61592	-4.37945	-4.70494		114.4	-3.20133	-2.98035	-2.88723
114.5	-6.33138	-6.65701	-6.77513		114.5	-4.55961	-4.4559	-4.68116		114.5	-3.07453	-2.97899	-2.72577
114.6	-6.3333	-6.46285	-6.73392		114.6	-4.61986	-4.34227	-4.84223		114.6	-3.27209	-2.89179	-3.28352
114.7	-6.03222	-6.32215	-6.30306		114.7	-5.00947	-4.66792	-4.52589		114.7	-3.12276	-2.91302	-3.04844
114.8	-6.21879	-6.1014	-6.22032		114.8	-4.8746	-4.5316	-4.48444		114.8	-3.29633	-2.86064	-3.13047
114.9	-6.32424	-6.24623	-6.13171		114.9	-4.49853	-4.42495	-4.73322		114.9	-3.35145	-2.88693	-3.26945
115	-6.56627	-6.07257	-5.99113		115	-4.45079	-4.04972	-4.76292		115	-3.45854	-2.96885	-3.13843
115.1	-6.34199	-5.94859	-5.97962		115.1	-4.39824	-3.91298	-4.57669		115.1	-3.35246	-2.84773	-3.14346
115.2	-6.43654	-5.65034	-6.07447		115.2	-4.34694	-4.01963	-4.40113		115.2	-2.97217	-2.84356	-3.01852
115.3	-6.63296	-5.63389	-5.88848		115.3	-4.52749	-4.08862	-4.54039		115.3	-2.98296	-2.80852	-3.17555
115.4	-6.53788	-5.91204	-5.83586		115.4	-4.28858	-4.29064	-4.4894		115.4	-3.03618	-2.91866	-3.1738
115.5	-6.43648	-5.7412	-5.75228		115.5	-4.26331	-4.40994	-4.36767		115.5	-2.93472	-3.0425	-2.95305
115.6	-6.58576	-5.72282	-5.83756		115.6	-4.34013	-4.32271	-4.59844		115.6	-2.70648	-3.17817	-3.02453
115.7	-6.22506	-5.73346	-5.69165		115.7	-4.30662	-4.26967	-4.51501		115.7	-2.91163	-3.27216	-3.05131
115.8	-6.22113	-6.22998	-5.75101		115.8	-4.46866	-4.12655	-4.46183		115.8	-2.98929	-3.24383	-3.00906
115.9	-5.94125	-6.12179	-5.65977		115.9	-4.4025	-4.04729	-4.57312		115.9	-2.78004	-3.14889	-2.91206
116	-5.88658	-5.88623	-5.39687		116	-4.37258	-4.22058	-4.55639		116	-2.87021	-2.9444	-2.84832
116.1	-5.57408	-5.98049	-5.48581		116.1	-4.47472	-4.31456	-4.52407		116.1	-3.03221	-2.66833	-2.75644
116.2	-5.59834	-5.86051	-5.59335		116.2	-4.55714	-4.35716	-4.4462		116.2	-3.24268	-2.7499	-2.67387
116.3	-5.60361	-5.7294	-5.45765		116.3	-4.74837	-4.22697	-4.37066		116.3	-3.25849	-2.87786	-2.97362
116.4	-5.65628	-5.89113	-5.44451		116.4	-4.69729	-4.2202	-4.51895		116.4	-3.27805	-3.09435	-3.04598
116.5	-5.72788	-5.89676	-5.4573		116.5	-4.44087	-4.09436	-4.34412		116.5	-3.41519	-3.20085	-3.10067
116.6	-5.71073	-5.61654	-5.49518		116.6	-4.3294	-3.91665	-4.22171		116.6	-3.44999	-2.89129	-3.05381
116.7	-5.72306	-5.80443	-5.7195		116.7	-4.25799	-4.05594	-4.16978		116.7	-3.63252	-2.90086	-3.209
116.8	-5.5527	-5.86655	-5.87877		116.8	-4.33616	-4.29174	-4.39553		116.8	-3.30091	-2.94718	-3.33788
116.9	-5.45509	-5.85936	-5.93487		116.9	-4.17963	-4.46889	-4.19388		116.9	-3.52595	-3.12432	-3.279
117	-5.45938	-5.75697	-6.17746		117	-4.31163	-4.61006	-4.15216		117	-3.13085	-3.34064	-2.87752
117.1	-5.56305	-5.60949	-6.09091		117.1	-4.4678	-4.44155	-4.23068		117.1	-2.95884	-3.37298	-2.89
117.2	-5.36637	-5.55358	-5.98517		117.2	-4.08403	-4.27299	-4.11912		117.2	-3.11885	-3.3212	-3.02287
117.3	-5.47312	-5.7335	-5.79516		117.3	-3.91598	-4.03428	-3.92218		117.3	-3.05566	-3.11261	-3.30148
117.4	-5.73042	-5.95564	-5.80116		117.4	-3.87137	-3.89281	-3.66177		117.4	-2.91169	-3.28556	-3.25999
117.5	-5.96734	-6.14322	-5.62377		117.5	-4.13715	-3.9585	-3.72284		117.5	-2.93945	-3.26019	-3.19014
117.6	-6.17447	-6.12218	-5.73213		117.6	-4.21006	-3.80397	-3.92607		117.6	-2.99929	-3.13262	-3.14183
117.7	-6.08878	-5.88662	-5.52476		117.7	-4.24191	-3.75788	-3.81725		117.7	-3.09576	-3.05573	-3.2479
117.8	-5.84323	-5.56753	-5.72442		117.8	-4.17812	-3.81281	-3.80646		117.8	-3.04185	-3.10684	-3.1342
117.9	-5.83826	-5.36984	-5.55635		117.9	-3.86734	-3.88235	-4.03848		117.9	-3.00398	-2.9532	-3.19109
118	-5.55939	-5.35228	-5.69262		118	-4.00894	-3.80857	-3.90818		118	-2.93872	-2.95695	-3.38312
118.1	-5.34779	-5.25781	-5.5987		118.1	-3.83991	-3.80911	-4.0631		118.1	-3.28291	-2.67203	-3.09852
118.2	-5.40212	-5.22435	-5.57047		118.2	-3.77683	-3.85071	-4.14466		118.2	-3.32493	-2.7345	-3.1436
118.3	-5.54379	-4.88952	-5.45589		118.3	-3.72781	-3.86057	-4.1601		118.3	-3.07631	-2.83715	-3.2294
118.4	-5.72056	-4.95411	-5.67189		118.4	-3.76342	-3.9072	-4.22281		118.4	-3.08249	-2.77768	-3.28999
118.5	-5.8554	-5.04341	-5.58291		118.5	-3.64138	-4.11081	-4.16654		118.5	-3.26098	-2.91473	-3.15955
118.6	-5.50048	-5.13648	-5.55515		118.6	-3.66005	-3.94615	-4.21368		118.6	-3.22158	-3.08788	-3.05362
118.7	-5.56529	-5.11125	-5.48327		118.7	-3.77931	-3.59978	-4.4439		118.7	-3.2825	-3.09068	-2.94513
118.8	-5.58995	-5.20924	-5.42067		118.8	-3.8966	-3.61377	-4.69877		118.8	-3.39683	-2.87578	-2.70235
118.9	-5.74619	-5.11308	-5.40065		118.9	-3.77926	-3.73732	-4.56997		118.9	-3.04096	-2.69847	-2.84806
119	-5.55663	-4.8541	-5.30123		119	-3.72261	-3.72874	-4.59013		119	-2.81392	-2.64715	-3.12031
119.1	-5.35458	-4.93275	-5.0868		119.1	-3.64927	-3.91722	-4.31195		119.1	-2.8936	-2.40612	-3.19901
119.2	-5.29331	-4.88048	-4.95989		119.2	-3.58542	-3.55138	-4.10042		119.2	-2.81101	-2.67869	-3.45198
119.3	-5.15226	-4.88588	-5.12828		119.3	-3.35585	-3.57529	-3.85755		119.3	-2.88167	-2.55154	-3.33666
119.4	-5.49966	-4.6694	-5.01737		119.4	-3.24821	-3.45396	-3.92724		119.4	-2.78152	-2.53633	-3.41267
119.5	-5.51951	-4.49208	-5.23595		119.5	-3.53548	-3.71904	-3.98065		119.5	-2.6885	-2.50727	-3.18529
119.6	-5.40686	-4.49358	-5.2574		119.6	-3.61834	-3.79255	-4.04095		119.6	-2.91202	-2.53674	-3.09638
119.7	-5.59794	-4.70856	-5.08912		119.7	-3.79422	-3.738	-3.88018		119.7	-3.10523	-2.43975	-2.84596
119.8	-5.39731	-4.88428	-5.03497		119.8	-3.84098	-3.53482	-3.94923		119.8	-2.88529	-2.36264	-2.72026
119.9	-5.32014	-4.90774	-4.86552		119.9	-3.77983	-3.53194	-3.69928		119.9	-3.06586	-2.44304	-2.60899
120	-5.16495	-5.03848	-4.571		120	-3.89828	-3.57934	-3.86697		120	-2.95607	-2.36626	-2.53405
120.1	-4.80758	-4.99499	-4.73403		120.1	-3.72794	-3.5233	-3.82057		120.1	-2.95688	-2.41728	-2.57354
120.2	-4.71595	-4.87735	-4.92662		120.2	-3.46292	-3.35889	-3.79694		120.2	-2.7754	-2.42085	-2.7485
120.3	-4.67002	-4.6496	-4.82845		120.3	-3.23907	-3.33047	-3.79008		120.3	-2.75776	-2.50797	-2.91769
120.4	-4.65959	-4.84028	-4.76055		120.4	-3.31108	-3.23465	-3.87468		120.4	-2.612	-2.55698	-3.01805
120.5	-4.70789	-4.97006	-4.69819		120.5	-3.16664	-3.42912	-4.04138		120.5	-2.85765	-2.81867	-2.64315
120.6	-4.60052	-4.92155	-4.92418		120.6	-3.32841	-3.42699	-4.26332		120.6	-2.92211	-2.76243	-2.71253
120.7	-4.7094	-4.90905	-4.86322		120.7	-3.615	-3.37716	-4.30894		120.7	-2.75067	-2.6706	-2.77572
120.8	-4.66197	-4.88551	-5.11869		120.8	-3.54185	-3.5459	-4.29884		120.8	-2.64513	-2.59702	-2.70124
120.9	-4.79837	-5.04971	-4.96138		120.9	-3.41575	-3.57004	-4.20138		120.9	-2.64499	-2.57058	-2.74542
121	-4.60907	-4.87339	-4.78783		121	-3.5039	-3.75	-4.27544		121	-2.49727	-2.89657	-2.56836
121.1	-4.62028	-4.95907	-4.70088		121.1	-3.79543	-3.63004	-4.39379		121.1	-2.5785	-2.66858	-2.65865
121.2	-4.63606	-4.77448	-4.88551		121.2	-3.64246	-3.59917	-4.37793		121.2	-2.79742	-2.69075	-2.6744
121.3	-4.72262	-4.56422	-4.88919		121.3	-3.40994	-3.39535	-4.21481		121.3	-2.92342	-2.65182	-2.91828
121.4	-4.73024	-4.66879	-4.84158		121.4	-3.25133	-3.43244	-4.15078		121.4	-2.907	-2.81073	-2.67434
121.5	-4.72331	-4.61116	-4.88349		121.5	-3.51932	-3.20336	-3.77571		121.5	-2.79893	-2.57727	-2.70675
121.6	-4.7422	-4.58416	-4.79754		121.6	-3.63405	-3.52498	-3.66604		121.6	-2.60102	-2.65085	-2.76015
121.7	-4.71926	-4.89933	-4.64048		121.7	-3.79998	-3.40193	-3.82801		121.7	-2.90144	-2.63266	-2.42341
121.8	-4.80796	-4.69588	-4.76126		121.8	-3.54687	-3.53249	-3.85862		121.8	-2.66264	-2.52525	-2.62379
121.9	-4.84929	-4.58353	-4.74897		121.9	-3.65285	-3.39043	-3.75615		121.9	-2.71076	-2.30763	-2.34498
122	-4.59315	-4.67376	-4.69318		122	-3.63325	-3.31505	-3.63135		122	-2.70953	-2.5061	-2.54801
122.1	-4.72043	-4.80833	-4.54359		122.1	-3.53875	-3.06452	-3.74669		122.1	-2.67416	-2.71859	-2.5355
122.2	-4.89444	-4.47466	-4.763		122.2	-3.7408	-3.37411	-3.74963		122.2	-2.66	-2.57183	-2.73342
122.3	-4.76656	-4.38951	-4.90111		122.3	-3.72789	-3.39387	-3.71989		122.3	-2.89493	-2.59808	-2.74024
122.4	-5.00473	-4.42501	-5.1003		122.4	-3.66892	-3.62419	-3.85175		122.4	-2.57491	-2.61595	-2.73171
122.5	-4.85216	-4.33352	-5.16464		122.5	-3.68144	-3.57958	-3.68426		122.5	-2.64602	-2.53303	-2.65284
122.6	-4.59996	-4.42296	-5.12205		122.6	-3.45789	-3.44866	-3.42007		122.6	-2.66441	-2.70374	-2.74009
122.7	-4.53936	-4.43978	-5.01388		122.7	-3.26732	-3.42112	-3.40647		122.7	-2.50922	-2.981	-2.70014
122.8	-4.60959	-4.38663	-5.02666		122.8	-3.13975	-3.5006	-3.51972		122.8	-2.48122	-2.68018	-2.74113
122.9	-4.68897	-4.62666	-4.84774		122.9	-3.1265	-3.21557	-3.6904		122.9	-2.42003	-2.58112	-2.8176
123	-4.73512	-4.5351	-4.76614		123	-3.34501	-3.13284	-3.63446		123	-2.17485	-2.4851	-2.59882
123.1	-4.59182	-4.51699	-4.80313		123.1	-3.32724	-3.04913	-3.81506		123.1	-2.19202	-2.44124	-2.60631
123.2	-4.34441	-4.69115	-4.72068		123.2	-3.60563	-2.94145	-3.87064		123.2	-2.40677	-2.50753	-2.69547
123.3	-4.20985	-4.9182	-4.67192		123.3	-3.46743	-3.16264	-3.88146		123.3	-2.39275	-2.45131	-2.69621
123.4	-4.50448	-4.74782	-4.74017		123.4	-3.43429	-3.24765	-3.48611		123.4	-2.46735	-2.68373	-2.43228
123.5	-4.64702	-4.63394	-4.79428		123.5	-3.24572	-3.24367	-3.07151		123.5	-2.36054	-2.88633	-2.5933
123.6	-4.56235	-4.6565	-4.52863		123.6	-3.50209	-3.06682	-3.1982		123.6	-2.30777	-2.5659	-2.61952
123.7	-4.56579	-4.66524	-4.08181		123.7	-3.49383	-3.12426	-3.52627		123.7	-2.4286	-2.60523	-2.67519
123.8	-4.56737	-4.53408	-4.25899		123.8	-3.22412	-3.21139	-3.64551		123.8	-2.23795	-2.79288	-2.71778
123.9	-4.23723	-4.27409	-4.13727		123.9	-3.29811	-3.39737	-3.78063		123.9	-2.17657	-2.48572	-2.70671
124	-4.21294	-4.26915	-4.16298		124	-3.21776	-3.29089	-3.58541		124	-2.23808	-2.51175	-2.67296
124.1	-4.49369	-4.16761	-4.25616		124.1	-3.42814	-3.34399	-3.61771		124.1	-2.46912	-2.49323	-2.59708
124.2	-4.62045	-4.25909	-4.32041		124.2	-3.48912	-3.48715	-3.30357		124.2	-2.53735	-2.36448	-2.49419
124.3	-4.61744	-4.31761	-4.26566		124.3	-3.45727	-3.59602	-3.32948		124.3	-2.45714	-2.48842	-2.45929
124.4	-4.55236	-4.57869	-4.24971		124.4	-3.48254	-3.7747	-3.41781		124.4	-2.69004	-2.77856	-2.54024
124.5	-4.60273	-4.44409	-4.38564		124.5	-2.99443	-3.69692	-3.2929		124.5	-2.84559	-2.75036	-2.6769
124.6	-4.63123	-4.49807	-4.53221		124.6	-3.0804	-3.58413	-3.1496		124.6	-2.71295	-2.69343	-2.61064
124.7	-4.53227	-4.58739	-4.40871		124.7	-2.81298	-3.42614	-3.21821		124.7	-2.65976	-2.56689	-2.66316
124.8	-4.76081	-4.60916	-4.41385		124.8	-2.93981	-3.28216	-3.32112		124.8	-2.52575	-2.68214	-2.71279
124.9	-4.71362	-4.36666	-4.36257		124.9	-2.66633	-3.07095	-3.0832		124.9	-2.49187	-2.45946	-2.42875
125	-4.50699	-4.29731	-4.35446		125	-2.79375	-2.8769	-3.15526		125	-2.24966	-2.73903	-2.50854
125.1	-4.33682	-4.41133	-4.21076		125.1	-2.79456	-2.98068	-3.34817		125.1	-2.41136	-2.63104	-2.35954
125.2	-3.98404	-4.35978	-4.03436		125.2	-2.86045	-2.99213	-3.43591		125.2	-2.59241	-2.49669	-2.42131
125.3	-3.97701	-4.18007	-4.21196		125.3	-2.8632	-3.12436	-3.64665		125.3	-2.27589	-2.50536	-2.21744
125.4	-3.95341	-4.11075	-4.27189		125.4	-3.08225	-2.92061	-3.6436		125.4	-2.24326	-2.59011	-2.17342
125.5	-4.05339	-4.10343	-4.00259		125.5	-3.14095	-2.99759	-3.81997		125.5	-2.21379	-2.40249	-2.36678
125.6	-4.31028	-4.34517	-4.12069		125.6	-3.13057	-3.13711	-3.51498		125.6	-2.0527	-2.16921	-2.46434
125.7	-4.52129	-4.40291	-4.24761		125.7	-3.1567	-3.31291	-3.54556		125.7	-2.16375	-2.23116	-2.41219
125.8	-4.5483	-4.24981	-4.49872		125.8	-3.1759	-3.06583	-3.69373		125.8	-2.10689	-2.04597	-2.60123
125.9	-4.69564	-4.23564	-4.42634		125.9	-2.88236	-3.13998	-3.59615		125.9	-1.88926	-2.07192	-2.88231
126	-4.373	-3.8996	-4.49716		126	-2.79869	-3.16274	-3.31132		126	-1.90683	-2.24828	-2.8302
126.1	-4.10194	-3.86754	-4.37858		126.1	-2.73436	-3.26731	-3.3374		126.1	-2.2275	-2.34147	-2.74798
126.2	-4.08611	-3.8875	-4.2518		126.2	-2.91325	-3.04435	-3.40063		126.2	-2.72352	-2.34008	-2.87401
126.3	-4.12093	-3.71773	-4.16173		126.3	-2.74139	-2.94457	-3.42674		126.3	-2.60908	-2.37937	-2.74598
126.4	-3.8654	-3.70231	-4.53336		126.4	-2.72088	-3.16783	-3.26721		126.4	-2.47904	-2.26744	-2.66346
126.5	-4.35726	-3.90735	-4.68968		126.5	-2.89567	-2.93767	-3.30282		126.5	-2.59285	-2.26232	-2.59992
126.6	-4.40738	-4.08863	-4.57354		126.6	-2.78788	-3.03633	-3.20694		126.6	-2.35788	-2.4812	-2.78594
126.7	-4.47661	-3.99189	-4.27764		126.7	-2.89073	-2.90137	-3.23528		126.7	-2.29531	-2.64991	-2.74194
126.8	-4.55231	-3.80236	-3.97796		126.8	-3.08235	-2.99783	-3.31581		126.8	-2.2853	-2.45317	-2.51166
126.9	-4.34508	-4.13996	-3.87844		126.9	-3.14936	-3.10269	-3.03092		126.9	-2.15001	-2.24948	-2.45587
127	-4.42575	-4.20481	-4.01956		127	-3.20288	-2.88174	-3.073		127	-2.18636	-2.35224	-2.35957
127.1	-4.32175	-3.99568	-4.08099		127.1	-3.29053	-2.74093	-3.11409		127.1	-2.23862	-2.30885	-2.12125
127.2	-4.06012	-4.27808	-4.18656		127.2	-3.32121	-2.60766	-3.33734		127.2	-2.18494	-2.19774	-2.27132
127.3	-4.09599	-4.28339	-4.15781		127.3	-3.41137	-2.62934	-3.37193		127.3	-2.14547	-2.48724	-2.31753
127.4	-4.13589	-4.00176	-4.35907		127.4	-3.43936	-2.58077	-3.36865		127.4	-2.18115	-2.46998	-2.55121
127.5	-4.30371	-3.64108	-4.64779		127.5	-3.50632	-2.7769	-3.02208		127.5	-2.10734	-2.59231	-2.57669
127.6	-4.01848	-3.88845	-4.48671		127.6	-3.21951	-2.93186	-3.07555		127.6	-1.97452	-2.52888	-2.24301
127.7	-4.09073	-3.83572	-4.29964		127.7	-3.23165	-2.72744	-3.0635		127.7	-2.24195	-2.51865	-2.44231
127.8	-4.12953	-3.80447	-4.17086		127.8	-3.12033	-2.70227	-3.10676		127.8	-2.41422	-2.58008	-2.43755
127.9	-4.03685	-3.93495	-3.9902		127.9	-3.10607	-2.56459	-3.20413		127.9	-2.42602	-2.60272	-2.25929
128	-3.8645	-3.9611	-3.71878		128	-3.01597	-2.50591	-3.19924		128	-2.47058	-2.45545	-2.29522
128.1	-4.05147	-3.92828	-3.77783		128.1	-3.14101	-2.67821	-3.40667		128.1	-2.65472	-2.33382	-2.43817
128.2	-4.06317	-3.72188	-4.00084		128.2	-2.99997	-2.92816	-3.63493		128.2	-2.48916	-2.29599	-2.49203
128.3	-3.98604	-3.78454	-3.92448		128.3	-2.85702	-2.9018	-3.56858		128.3	-2.41633	-2.32615	-2.49447
128.4	-3.91786	-3.92375	-3.90095		128.4	-2.73922	-2.87279	-3.65104		128.4	-2.46607	-2.17938	-2.57121
128.5	-4.12256	-3.74849	-3.95478		128.5	-2.77851	-3.13781	-3.89002		128.5	-2.38195	-2.32878	-2.50515
128.6	-4.10733	-3.65714	-3.88147		128.6	-2.97927	-3.04586	-3.7845		128.6	-2.25737	-2.19919	-2.63499
128.7	-4.09512	-3.67131	-3.76472		128.7	-3.05635	-2.96939	-3.69857		128.7	-2.19825	-2.22457	-2.73078
128.8	-4.21119	-3.46328	-3.50148		128.8	-2.88104	-2.89517	-3.91905		128.8	-2.29067	-2.45128	-2.75429
128.9	-3.9665	-3.63064	-3.52873		128.9	-2.94297	-3.03462	-3.79751		128.9	-2.30926	-2.5071	-2.74186
129	-3.97858	-3.57222	-3.6418		129	-3.09868	-3.01657	-3.49119		129	-2.24652	-2.33875	-2.63298
129.1	-3.97443	-3.60785	-3.50146		129.1	-2.98041	-2.8582	-3.32079		129.1	-2.14004	-2.12219	-2.51789
129.2	-3.7946	-3.70845	-3.78728		129.2	-2.91328	-3.00051	-3.24554		129.2	-1.88612	-2.30356	-2.34803
129.3	-3.59496	-3.66296	-3.80484		129.3	-2.92911	-2.78805	-2.83528		129.3	-2.12881	-2.47452	-2.22589
129.4	-3.70872	-3.55653	-3.63797		129.4	-3.11203	-2.94088	-2.77312		129.4	-2.16349	-2.46098	-2.19773
129.5	-3.86996	-3.71065	-3.52577		129.5	-3.34202	-2.50693	-2.64186		129.5	-2.07988	-2.38796	-2.23217
129.6	-3.88957	-3.85519	-3.28729		129.6	-3.44191	-2.75623	-2.71199		129.6	-2.38267	-2.28404	-2.0834
129.7	-3.85632	-3.94843	-3.53986		129.7	-3.48402	-2.9357	-3.00687		129.7	-2.51148	-2.33859	-2.42137
129.8	-3.9571	-3.57987	-3.50997		129.8	-3.29963	-3.12739	-3.08482		129.8	-2.62321	-2.44923	-2.43604
129.9	-3.88226	-3.57631	-3.84134		129.9	-3.27225	-3.14769	-3.23641		129.9	-2.85533	-2.31717	-2.50498
130	-3.91539	-3.79528	-3.74309		130	-3.28846	-3.29583	-3.19505		130	-2.9288	-2.27899	-2.236
130.1	-3.81755	-3.79641	-3.73554		130.1	-3.23323	-2.87575	-3.19572		130.1	-2.98098	-2.51714	-2.26776
130.2	-3.74158	-3.91674	-3.68479		130.2	-3.08323	-2.85394	-3.31762		130.2	-2.94061	-2.49977	-2.27775
130.3	-3.57044	-3.84537	-4.01771		130.3	-3.06211	-2.80335	-3.36907		130.3	-2.91043	-2.29185	-2.24344
130.4	-3.42822	-4.02438	-3.98309		130.4	-2.95182	-2.64831	-3.16547		130.4	-2.60667	-1.9939	-2.16605
130.5	-3.71312	-3.61423	-4.13939		130.5	-2.9237	-2.75928	-3.03194		130.5	-2.2393	-1.98445	-1.95205
130.6	-3.87203	-3.49457	-4.14939		130.6	-2.67017	-2.42457	-3.04653		130.6	-2.25479	-2.13257	-2.08651
130.7	-3.79692	-3.40761	-4.00095		130.7	-2.55253	-2.52966	-2.76812		130.7	-2.06358	-2.08795	-1.91354
130.8	-3.80094	-3.57343	-3.87389		130.8	-2.61427	-2.49975	-2.67377		130.8	-2.03809	-2.37904	-2.36168
130.9	-3.61419	-3.69504	-3.96238		130.9	-2.6916	-2.39369	-2.78191		130.9	-1.90253	-2.33065	-2.50821
131	-3.63851	-3.76745	-3.87964		131	-2.71853	-2.65563	-2.89579		131	-1.8027	-2.2282	-2.37165
131.1	-3.20979	-3.84474	-3.95619		131.1	-2.89028	-2.53124	-3.21052		131.1	-1.81664	-2.07548	-2.53409
131.2	-3.41443	-3.81049	-3.69508		131.2	-2.78063	-2.75265	-3.35454		131.2	-1.75763	-2.02589	-2.3221
131.3	-3.59575	-3.40603	-3.70067		131.3	-2.74042	-2.65582	-3.46057		131.3	-2.11417	-1.93478	-2.29327
131.4	-3.38873	-3.32762	-3.70944		131.4	-2.47501	-2.55526	-3.44451		131.4	-2.10583	-1.90765	-2.4232
131.5	-3.53016	-3.34061	-3.69527		131.5	-2.62921	-2.48295	-3.46008		131.5	-2.22875	-1.94887	-2.3616
131.6	-3.33631	-3.46753	-3.85828		131.6	-2.62408	-2.54416	-3.07949		131.6	-2.22786	-1.83333	-2.08354
131.7	-3.58186	-3.5676	-3.88005		131.7	-2.76328	-2.71318	-2.97796		131.7	-2.10577	-2.20293	-2.07509
131.8	-3.72336	-3.661	-3.73665		131.8	-2.96465	-2.64778	-3.12999		131.8	-2.27871	-2.34193	-2.25524
131.9	-3.75515	-3.49674	-3.55136		131.9	-3.00911	-2.861	-3.18384		131.9	-2.01614	-2.60694	-2.21654
132	-3.80895	-3.54954	-3.55493		132	-2.9856	-2.75056	-2.97637		132	-1.97569	-2.62099	-2.10329
132.1	-3.77199	-3.41238	-3.60689		132.1	-2.93571	-2.94183	-2.99585		132.1	-1.9813	-2.32839	-2.2051
132.2	-3.47916	-3.37714	-3.75683		132.2	-2.63139	-2.89185	-2.97928		132.2	-1.98683	-2.28142	-2.12563
132.3	-3.57586	-3.27555	-3.53376		132.3	-2.58807	-2.90958	-2.68876		132.3	-2.06457	-2.2339	-2.20678
132.4	-3.69934	-3.40932	-3.7877		132.4	-2.57668	-2.73416	-2.70474		132.4	-2.08233	-2.25632	-2.39962
132.5	-3.94017	-3.31706	-3.73589		132.5	-2.74238	-2.72896	-2.67797		132.5	-2.33232	-2.13259	-2.28946
132.6	-4.10697	-3.50431	-3.66947		132.6	-2.90225	-2.61512	-2.82589		132.6	-2.20613	-2.36966	-2.38666
132.7	-3.92049	-3.5009	-3.37719		132.7	-2.60736	-2.6253	-2.93209		132.7	-2.31847	-2.52673	-2.68709
132.8	-3.70991	-3.47448	-3.33317		132.8	-2.32241	-2.85966	-2.89196		132.8	-2.04264	-2.54781	-2.62534
132.9	-3.7369	-3.62743	-3.32522		132.9	-2.07878	-2.92452	-3.02802		132.9	-1.92136	-2.38887	-2.70015
133	-3.64461	-3.61163	-3.43483		133	-2.1865	-3.03864	-2.97907		133	-1.95121	-2.51513	-2.54299
133.1	-3.73785	-3.62091	-3.43409		133.1	-2.58367	-3.06072	-3.08168		133.1	-1.94389	-2.58834	-2.38027
133.2	-3.60607	-3.52992	-3.65936		133.2	-2.70704	-2.95166	-2.97294		133.2	-1.80898	-2.5586	-2.38871
133.3	-3.6293	-3.29825	-3.74523		133.3	-2.66265	-2.64678	-2.90551		133.3	-1.83945	-2.29168	-2.19876
133.4	-3.4006	-3.18951	-4.02683		133.4	-2.54854	-2.57708	-2.79143		133.4	-1.98467	-2.39058	-2.0144
133.5	-3.64466	-3.23105	-3.97536		133.5	-2.6411	-2.35002	-2.86114		133.5	-2.15541	-2.39527	-2.22761
133.6	-3.66718	-3.2242	-4.0069		133.6	-2.69874	-2.43918	-2.87356		133.6	-2.11182	-2.53397	-2.14625
133.7	-3.75414	-3.38735	-3.9682		133.7	-2.627	-2.164	-2.77121		133.7	-2.1706	-2.68313	-2.31181
133.8	-3.75298	-3.14292	-3.88529		133.8	-2.61682	-2.24314	-2.7997		133.8	-2.13763	-2.81686	-2.38959
133.9	-3.41344	-3.31293	-3.45188		133.9	-2.67657	-2.60003	-2.89496		133.9	-2.07245	-2.82357	-2.47169
134	-3.56328	-3.37093	-3.47195		134	-2.6782	-2.77618	-2.71587		134	-2.10406	-2.65485	-2.50248
134.1	-3.61803	-3.42861	-3.54016		134.1	-2.60912	-2.92416	-2.75191		134.1	-2.11199	-2.41818	-2.49792
134.2	-3.57457	-3.49147	-3.63885		134.2	-2.41545	-2.82452	-2.74641		134.2	-2.2458	-2.21659	-2.65867
134.3	-3.64939	-3.41318	-3.72504		134.3	-2.53561	-2.71619	-2.64874		134.3	-2.45519	-2.16346	-2.73847
134.4	-3.31092	-3.11882	-3.95358		134.4	-2.20313	-2.53625	-2.44208		134.4	-2.47896	-2.12192	-2.5565
134.5	-3.30781	-3.14909	-3.85973		134.5	-2.0353	-2.42489	-2.52298		134.5	-2.60137	-2.15413	-2.52518
134.6	-3.11283	-3.12603	-3.80625		134.6	-2.14652	-2.53606	-2.55244		134.6	-2.36409	-2.16246	-2.58462
134.7	-3.30213	-3.19603	-3.80141		134.7	-2.28406	-2.71993	-2.744		134.7	-2.38406	-2.01828	-2.65965
134.8	-3.29758	-3.25874	-3.69907		134.8	-2.43907	-2.73198	-2.55972		134.8	-2.31563	-1.97494	-2.47159
134.9	-3.83281	-3.45161	-3.74879		134.9	-2.60124	-2.54633	-2.70792		134.9	-2.09361	-2.10525	-2.31117
135	-3.59929	-3.3475	-3.69484		135	-2.70163	-2.51008	-2.65716		135	-2.09997	-1.89811	-2.30161
135.1	-3.4638	-3.54299	-3.66855		135.1	-2.49623	-2.62816	-2.57524		135.1	-2.19667	-1.9091	-2.25271
135.2	-3.34046	-3.48136	-3.4238		135.2	-2.21949	-2.98349	-2.62764		135.2	-2.25657	-2.06088	-2.22628
135.3	-3.38349	-3.58788	-3.29185		135.3	-2.54935	-2.89794	-2.62062		135.3	-2.32803	-1.87208	-2.11706
135.4	-3.02853	-3.54253	-3.06658		135.4	-2.3779	-2.56181	-2.85857		135.4	-2.27469	-2.04173	-2.24583
135.5	-3.31447	-3.4171	-3.19422		135.5	-2.45723	-2.72805	-2.82832		135.5	-1.93393	-2.14967	-2.17058
135.6	-3.29138	-3.71042	-3.29645		135.6	-2.69509	-2.76682	-2.81912		135.6	-2.00418	-2.46388	-2.22473
135.7	-2.95382	-4.13896	-3.17802		135.7	-2.5678	-2.75256	-2.92921		135.7	-1.91255	-2.51623	-2.18199
135.8	-2.88286	-3.89526	-3.36151		135.8	-2.63304	-2.5795	-2.62575		135.8	-1.91575	-2.30163	-2.30994
135.9	-2.93917	-3.83151	-3.60694		135.9	-2.79941	-2.67602	-2.57853		135.9	-1.97915	-2.3767	-2.25142
136	-3.02332	-3.59287	-3.73856		136	-2.55761	-2.72079	-2.32147		136	-1.81528	-2.12433	-2.12599
136.1	-3.15841	-3.53333	-3.53442		136.1	-2.49022	-2.82015	-2.2785		136.1	-1.8724	-2.39057	-2.22981
136.2	-2.97219	-3.42351	-3.60346		136.2	-2.69468	-2.68613	-2.45132		136.2	-2.06589	-2.34768	-2.11555
136.3	-3.0995	-3.59745	-3.57342		136.3	-2.66537	-2.63769	-2.73026		136.3	-1.91223	-2.27828	-2.49066
136.4	-3.15245	-3.37737	-3.41505		136.4	-2.46197	-2.41683	-2.79317		136.4	-1.78661	-1.99887	-2.52596
136.5	-3.23269	-3.27761	-3.36296		136.5	-2.29098	-2.13815	-2.81604		136.5	-2.0359	-2.1246	-2.60283
136.6	-3.30402	-3.1948	-3.15193		136.6	-2.23259	-1.95332	-2.89062		136.6	-2.14504	-1.78718	-2.58076
136.7	-3.03535	-3.53741	-3.15069		136.7	-2.00161	-2.18689	-2.83331		136.7	-2.26572	-2.03718	-2.24926
136.8	-3.18071	-3.52577	-3.25304		136.8	-2.09539	-2.36084	-2.79321		136.8	-2.27753	-2.303	-2.31443
136.9	-2.8604	-3.42856	-3.15954		136.9	-2.46375	-2.42173	-2.81524		136.9	-2.43796	-2.26472	-2.40185
137	-2.78678	-3.25155	-3.04712		137	-2.43941	-2.51568	-2.6613		137	-2.10409	-2.06549	-2.18077
137.1	-3.03897	-3.05461	-3.44275		137.1	-2.77582	-2.45747	-2.3662		137.1	-2.19771	-1.75532	-2.21546
137.2	-3.41284	-3.25513	-3.28094		137.2	-2.89243	-2.2119	-2.36937		137.2	-2.15727	-1.72463	-2.39913
137.3	-3.55605	-3.38682	-3.25231		137.3	-2.9154	-2.29641	-2.19838		137.3	-2.25591	-1.73732	-2.35693
137.4	-3.42798	-3.35029	-3.22307		137.4	-2.59524	-2.2736	-2.31879		137.4	-2.2419	-1.91394	-2.24023
137.5	-3.43677	-3.28042	-3.31371		137.5	-2.51647	-2.16584	-2.12379		137.5	-2.3471	-2.20923	-2.22577
137.6	-3.22386	-3.23344	-3.40934		137.6	-2.14894	-2.26314	-2.51567		137.6	-2.29897	-2.13417	-2.33652
137.7	-2.97284	-3.45126	-3.25386		137.7	-2.15029	-2.1739	-2.73838		137.7	-2.4455	-1.97134	-2.35627
137.8	-2.89592	-3.33897	-3.15699		137.8	-2.20621	-2.21733	-2.87204		137.8	-2.27527	-2.0554	-2.20782
137.9	-2.8973	-3.21058	-3.35729		137.9	-2.22437	-2.35444	-2.98941		137.9	-2.22165	-1.89578	-2.14673
138	-3.03875	-3.1383	-3.18542		138	-2.33315	-2.43505	-3.04316		138	-2.20694	-1.81639	-1.99901
138.1	-3.11095	-3.0518	-3.22587		138.1	-2.32586	-2.36053	-2.97877		138.1	-2.07923	-1.72157	-2.05436
138.2	-3.07362	-3.0915	-2.986		138.2	-2.12731	-2.41404	-2.83921		138.2	-2.00714	-1.81217	-1.88656
138.3	-3.26485	-3.24321	-2.95685		138.3	-2.11061	-2.4016	-2.77801		138.3	-2.23387	-1.87192	-1.56624
138.4	-3.17808	-3.27146	-2.8054		138.4	-2.10537	-2.56283	-2.72656		138.4	-1.95353	-2.04728	-1.90453
138.5	-2.9393	-3.16932	-3.03379		138.5	-2.05019	-2.44176	-2.65016		138.5	-1.64831	-1.96453	-1.96926
138.6	-2.94489	-3.11142	-2.97558		138.6	-2.14509	-2.42049	-2.60614		138.6	-1.84123	-2.35814	-2.08112
138.7	-2.96498	-3.44347	-2.9393		138.7	-2.34373	-2.57522	-2.79187		138.7	-2.04732	-2.29183	-2.09645
138.8	-3.10244	-3.29817	-2.96965		138.8	-2.54871	-2.67112	-2.65836		138.8	-2.23796	-2.2066	-2.27719
138.9	-3.24048	-3.17211	-2.97243		138.9	-2.21459	-2.71194	-2.76997		138.9	-1.99639	-2.20312	-2.27989
139	-3.22359	-3.27975	-3.17711		139	-2.09266	-2.62194	-2.73967		139	-1.94391	-1.97447	-2.04025
139.1	-2.99049	-3.07151	-3.41165		139.1	-2.19348	-2.39421	-3.00033		139.1	-1.66034	-1.83816	-1.94965
139.2	-3.09886	-3.19377	-3.47362		139.2	-2.60742	-2.47278	-3.01538		139.2	-1.94028	-1.75965	-1.95904
139.3	-3.13224	-3.1818	-3.42324		139.3	-2.75594	-2.25613	-3.04361		139.3	-1.88609	-2.04204	-1.62964
139.4	-3.02685	-3.41704	-3.29847		139.4	-3.04063	-2.10465	-2.90622		139.4	-2.04714	-1.97236	-1.37338
139.5	-3.07595	-3.44848	-2.87126		139.5	-2.91147	-2.25435	-2.92928		139.5	-1.80926	-2.12614	-1.42418
139.6	-2.93927	-3.33074	-3.04955		139.6	-2.7396	-2.12083	-3.07046		139.6	-1.97808	-2.23766	-1.92775
139.7	-2.87746	-3.12562	-3.004		139.7	-2.97708	-2.3879	-2.9074		139.7	-2.13289	-2.21328	-2.14911
139.8	-2.66858	-3.16826	-3.11862		139.8	-2.68802	-2.53863	-2.722		139.8	-2.2544	-2.21724	-2.28021
139.9	-2.61963	-3.38499	-2.98523		139.9	-2.50222	-2.51826	-2.8372		139.9	-2.11721	-1.94736	-2.29875
140	-2.52472	-3.52559	-3.10315		140	-2.23435	-2.43973	-2.77849		140	-2.09239	-1.75932	-2.20315
140.1	-2.50542	-3.47662	-3.21339		140.1	-1.95223	-2.43308	-2.71905		140.1	-2.24966	-1.57708	-2.08602
140.2	-2.73593	-3.5758	-3.2747		140.2	-2.1796	-2.48636	-2.58973		140.2	-2.52617	-1.78084	-2.08347
140.3	-2.9338	-3.64117	-3.20265		140.3	-2.24951	-2.33113	-2.60322		140.3	-2.49727	-1.76079	-2.23374
140.4	-2.93936	-3.53609	-3.11766		140.4	-2.31229	-2.26933	-2.52326		140.4	-2.41476	-1.76548	-2.15075
140.5	-2.98656	-3.5278	-3.33964		140.5	-2.25786	-2.3691	-2.56482		140.5	-2.51208	-1.7876	-1.95841
140.6	-3.1676	-3.28625	-3.33616		140.6	-2.28352	-2.55301	-2.45126		140.6	-2.34798	-1.80227	-1.96652
140.7	-3.11314	-3.37382	-3.36481		140.7	-2.13107	-2.54569	-2.5325		140.7	-2.21518	-1.94689	-2.20542
140.8	-3.0427	-3.55234	-3.29967		140.8	-2.30051	-2.51869	-2.50735		140.8	-2.23481	-2.00027	-2.14098
140.9	-3.11297	-3.59762	-3.31706		140.9	-2.37136	-2.21805	-2.17048		140.9	-2.21277	-2.08406	-2.09818
141	-2.82	-3.34861	-3.28868		141	-2.26231	-2.24691	-2.2961		141	-2.36426	-1.84221	-2.01268
141.1	-2.8384	-3.19809	-3.3398		141.1	-2.26083	-2.10804	-2.4973		141.1	-2.20954	-1.89295	-2.11308
141.2	-2.81732	-2.99807	-3.1584		141.2	-2.23518	-1.94245	-2.45821		141.2	-2.38624	-1.87587	-1.9543
141.3	-2.77087	-3.04534	-3.30816		141.3	-2.48359	-2.11707	-2.57726		141.3	-2.43137	-2.0664	-1.8557
141.4	-2.92854	-3.06075	-3.25144		141.4	-2.47617	-2.05904	-2.71628		141.4	-2.33901	-1.81733	-2.05239
141.5	-3.04716	-3.18588	-3.09806		141.5	-2.46818	-2.19411	-2.64034		141.5	-2.29782	-1.55233	-2.15675
141.6	-3.06164	-3.17659	-3.06743		141.6	-2.57661	-2.25399	-2.58378		141.6	-2.2599	-1.60429	-2.07429
141.7	-3.2032	-3.41456	-3.08563		141.7	-2.53774	-2.22463	-2.63881		141.7	-2.02553	-1.77249	-2.11846
141.8	-3.25049	-3.52084	-3.25062		141.8	-2.60791	-2.11919	-2.65107		141.8	-1.95849	-1.81997	-2.04209
141.9	-3.18969	-3.50751	-3.30614		141.9	-2.47815	-2.37782	-2.63241		141.9	-1.97242	-1.70549	-1.98103
142	-3.19737	-3.58027	-3.21796		142	-2.56821	-2.49888	-2.60493		142	-2.13387	-1.95303	-1.99906
142.1	-3.29548	-3.49318	-2.81247		142.1	-2.49591	-2.52203	-2.66488		142.1	-1.99414	-2.01965	-1.88699
142.2	-3.40382	-3.43512	-2.82935		142.2	-2.11785	-2.58248	-2.70305		142.2	-2.1133	-1.94824	-1.92578
142.3	-3.29859	-3.3582	-2.79237		142.3	-2.16935	-2.48322	-2.6297		142.3	-2.19098	-1.68654	-2.17642
142.4	-3.20861	-3.06659	-2.89137		142.4	-2.13128	-2.30119	-2.46217		142.4	-2.17672	-1.94587	-2.11347
142.5	-3.08508	-3.18612	-2.92263		142.5	-2.30831	-1.9187	-2.71658		142.5	-2.01174	-1.62823	-1.95401
142.6	-2.97689	-3.08435	-3.12137		142.6	-2.35224	-1.74612	-2.6088		142.6	-1.86792	-1.67968	-2.06023
142.7	-2.99603	-2.95306	-3.23119		142.7	-2.40847	-1.92777	-2.44902		142.7	-1.73834	-1.64305	-1.68507
142.8	-2.96471	-2.91983	-3.23305		142.8	-2.37847	-1.7331	-2.6727		142.8	-1.46381	-1.63719	-1.74274
142.9	-3.23463	-2.92904	-2.86841		142.9	-2.33551	-1.65922	-2.56926		142.9	-1.32331	-1.5471	-1.91613
143	-2.88434	-3.1787	-2.87374		143	-2.35786	-1.92564	-2.46196		143	-1.46453	-1.59546	-2.06389
143.1	-2.99544	-3.32098	-2.84686		143.1	-2.26568	-2.25077	-2.35865		143.1	-1.54995	-1.53997	-1.97987
143.2	-3.07773	-3.30233	-2.7756		143.2	-2.55265	-2.21986	-2.53259		143.2	-1.69613	-1.76164	-1.97614
143.3	-3.02797	-3.20595	-2.74838		143.3	-2.42154	-2.17432	-2.62754		143.3	-1.81513	-2.00176	-2.08994
143.4	-2.77781	-3.30822	-2.75741		143.4	-2.36743	-2.15094	-2.56943		143.4	-1.99915	-2.07476	-2.28011
143.5	-2.79999	-3.21064	-2.78536		143.5	-2.3946	-2.16306	-2.32625		143.5	-1.97432	-2.00927	-2.2691
143.6	-2.97734	-2.75883	-2.69307		143.6	-2.69253	-2.3534	-2.50121		143.6	-1.85454	-1.97859	-2.29666
143.7	-2.86472	-2.61043	-2.55943		143.7	-2.50367	-2.22653	-2.4913		143.7	-2.27456	-1.92696	-2.37928
143.8	-2.69587	-2.65421	-2.88459		143.8	-2.22319	-2.14396	-2.32201		143.8	-2.35543	-2.05858	-2.60804
143.9	-2.48696	-2.79254	-2.7567		143.9	-2.14763	-1.91861	-2.33519		143.9	-2.20081	-2.05294	-2.24526
144	-2.69021	-2.77546	-3.08575		144	-2.18553	-1.91614	-2.04824		144	-2.04326	-2.11657	-2.08134
144.1	-2.68956	-3.08323	-3.12426		144.1	-2.34542	-1.72208	-2.29287		144.1	-1.79156	-2.02111	-1.95715
144.2	-2.77051	-2.96729	-2.88623		144.2	-2.41306	-1.87812	-2.17944		144.2	-2.0333	-1.90304	-1.9404
144.3	-2.8459	-3.15672	-3.2464		144.3	-2.50593	-1.99284	-2.31785		144.3	-1.90318	-1.88608	-1.77421
144.4	-3.02544	-2.85839	-3.01432		144.4	-2.31792	-2.07752	-2.37188		144.4	-1.81847	-1.82761	-2.00921
144.5	-3.33338	-2.76917	-2.94199		144.5	-2.29834	-1.98132	-2.43925		144.5	-1.9449	-1.90189	-2.00142
144.6	-3.19072	-2.65954	-3.05791		144.6	-2.1422	-2.09462	-2.18252		144.6	-2.09039	-1.85036	-1.89309
144.7	-2.91858	-2.7296	-3.01989		144.7	-2.24432	-2.18801	-2.17332		144.7	-2.03849	-1.70378	-1.89727
144.8	-3.0028	-3.03572	-2.98002		144.8	-2.09467	-2.1397	-2.40389		144.8	-2.02858	-1.75683	-1.81525
144.9	-2.84314	-3.10657	-2.78307		144.9	-2.0102	-2.24766	-2.51207		144.9	-1.96928	-1.67022	-1.93936
145	-2.75924	-3.13535	-2.8217		145	-1.70285	-2.25899	-2.29502		145	-1.96168	-1.73661	-1.96769
145.1	-2.69883	-3.04669	-2.80497		145.1	-1.74122	-2.41347	-2.49224		145.1	-1.8946	-1.66207	-2.0121
145.2	-2.40981	-3.18511	-2.97374		145.2	-1.88082	-2.3021	-2.58824		145.2	-1.90026	-1.70817	-2.11491
145.3	-2.50897	-3.42462	-3.10953		145.3	-1.84311	-2.2032	-2.30297		145.3	-1.94515	-1.78763	-2.23906
145.4	-2.66806	-3.3628	-2.93619		145.4	-2.27827	-2.22005	-2.18113		145.4	-1.80259	-1.98376	-2.09571
145.5	-2.73596	-3.24484	-2.69955		145.5	-2.20086	-2.02945	-2.05134		145.5	-1.88805	-1.82075	-2.11856
145.6	-2.7438	-2.98441	-2.53859		145.6	-2.33527	-1.98722	-2.01554		145.6	-1.74845	-1.90315	-2.34532
145.7	-2.99718	-2.92415	-2.44822		145.7	-2.46643	-1.9159	-2.08173		145.7	-1.84237	-1.85072	-2.35061
145.8	-2.632	-2.83452	-2.47295		145.8	-2.53529	-1.8448	-2.32314		145.8	-1.7093	-1.9173	-2.19165
145.9	-2.69255	-2.71406	-2.4991		145.9	-2.15342	-2.12949	-2.48271		145.9	-1.68608	-2.18846	-2.01125
146	-3.04705	-2.6578	-2.45546		146	-2.21969	-2.3041	-2.42377		146	-1.54572	-2.42466	-1.96444
146.1	-2.9426	-2.55631	-2.53139		146.1	-2.19411	-2.17373	-2.22235		146.1	-1.84134	-2.21121	-1.99019
146.2	-2.97259	-2.72746	-2.66941		146.2	-2.15848	-2.01578	-2.41481		146.2	-1.91448	-2.23841	-1.91272
146.3	-2.9559	-2.77458	-2.86937		146.3	-2.35441	-1.94866	-2.58771		146.3	-1.94873	-1.95724	-1.90541
146.4	-2.98417	-2.82136	-2.8616		146.4	-2.7411	-2.09533	-2.50623		146.4	-2.00002	-1.93261	-1.7934
146.5	-3.02656	-2.76881	-2.8593		146.5	-2.42683	-1.9064	-2.60769		146.5	-2.05323	-2.0314	-1.60703
146.6	-2.72851	-2.73984	-2.92305		146.6	-2.49488	-1.92516	-2.51347		146.6	-2.12416	-1.90643	-1.76562
146.7	-2.64545	-2.59774	-2.89742		146.7	-2.46434	-1.96296	-2.55328		146.7	-2.08577	-2.09335	-1.64831
146.8	-2.55854	-2.57094	-3.14744		146.8	-2.49237	-2.13544	-2.55461		146.8	-2.15986	-2.06039	-1.83345
146.9	-2.54285	-2.80998	-2.91953		146.9	-2.73549	-2.20211	-2.39302		146.9	-2.25889	-1.82533	-1.83231
147	-2.77829	-2.83748	-2.69292		147	-2.75548	-2.24137	-2.20728		147	-2.1283	-1.67754	-2.02307
147.1	-2.7926	-2.71787	-2.67979		147.1	-2.50608	-2.28169	-2.20739		147.1	-2.07373	-1.89243	-2.05403
147.2	-3.06981	-2.76492	-2.69483		147.2	-2.38173	-2.30228	-2.09047		147.2	-1.94722	-1.95321	-2.17319
147.3	-2.95661	-2.63478	-2.73013		147.3	-2.51174	-2.41766	-2.44528		147.3	-1.98083	-1.95377	-2.12509
147.4	-2.8482	-2.83226	-2.68251		147.4	-2.37316	-2.35502	-2.28136		147.4	-2.1844	-1.95126	-1.87906
147.5	-2.84915	-2.70269	-2.76801		147.5	-2.37385	-2.63681	-2.21677		147.5	-2.10046	-1.76423	-1.51908
147.6	-2.94381	-2.76212	-2.80424		147.6	-2.65738	-2.74804	-2.25859		147.6	-1.97677	-1.65615	-1.85026
147.7	-3.05221	-2.7837	-2.67667		147.7	-2.57535	-2.35625	-2.45633		147.7	-1.9727	-1.74057	-1.9027
147.8	-2.98297	-2.7259	-2.7448		147.8	-2.33908	-2.24994	-2.55417		147.8	-1.93725	-1.91315	-1.91935
147.9	-2.94497	-2.75096	-2.69408		147.9	-2.26878	-2.04726	-2.41944		147.9	-1.80968	-1.59161	-1.95478
148	-2.94116	-2.72686	-2.68016		148	-2.15783	-2.09689	-2.2938		148	-1.81529	-1.54061	-2.11295
148.1	-2.77873	-2.74407	-2.82904		148.1	-2.13621	-2.03645	-2.16577		148.1	-1.95456	-1.69555	-2.20212
148.2	-2.65283	-2.72713	-2.71361		148.2	-2.24087	-2.02738	-2.20142		148.2	-1.94828	-1.65404	-2.14418
148.3	-2.76556	-2.62495	-2.56728		148.3	-2.21907	-2.04141	-2.21458		148.3	-2.31773	-1.67996	-2.00845
148.4	-3.00359	-2.5923	-2.56715		148.4	-2.23893	-2.04434	-2.16079		148.4	-2.28097	-1.72365	-2.06257
148.5	-3.08694	-2.6833	-2.54645		148.5	-2.31419	-2.33042	-2.31371		148.5	-2.11878	-1.56864	-2.10605
148.6	-3.17398	-2.62748	-2.336		148.6	-2.21121	-2.38479	-2.12366		148.6	-2.25437	-1.8162	-2.30464
148.7	-3.17622	-2.70734	-2.87545		148.7	-2.14192	-2.47665	-2.26462		148.7	-2.24109	-1.87675	-2.52001
148.8	-3.15586	-2.54505	-2.7018		148.8	-2.00018	-2.3863	-2.33254		148.8	-1.97296	-2.04498	-2.60094
148.9	-2.96204	-2.80697	-2.91833		148.9	-2.28607	-2.51409	-2.28286		148.9	-1.75868	-1.95676	-2.20124
149	-2.85194	-2.84857	-3.10461		149	-2.39956	-2.23586	-2.27183		149	-1.63464	-2.08873	-2.01806
149.1	-2.5853	-2.90501	-2.916		149.1	-2.23244	-2.09573	-2.13146		149.1	-1.72559	-2.03173	-2.04232
149.2	-2.77692	-2.80519	-2.59081		149.2	-2.27261	-2.08075	-1.79688		149.2	-1.78411	-2.14267	-2.23758
149.3	-3.1091	-2.54472	-2.65825		149.3	-2.36635	-2.00729	-1.64458		149.3	-2.00973	-1.93113	-1.77727
149.4	-2.98357	-2.70179	-2.80497		149.4	-2.19154	-2.00353	-2.02029		149.4	-2.021	-2.05044	-1.76584
149.5	-2.83898	-2.66888	-2.79494		149.5	-2.19221	-2.01927	-1.75579		149.5	-2.03461	-1.82936	-1.50462
149.6	-2.73608	-2.50363	-2.70862		149.6	-2.24525	-2.06043	-1.95512		149.6	-1.79795	-1.71919	-1.66309
149.7	-2.57549	-2.49278	-2.65204		149.7	-2.30876	-2.19267	-2.20865		149.7	-1.47582	-1.94435	-1.87158
149.8	-2.42276	-2.61997	-2.65172		149.8	-2.2433	-2.08787	-2.04352		149.8	-1.73529	-1.83982	-2.00934
149.9	-2.58079	-2.39763	-2.60003		149.9	-2.06158	-1.9776	-1.88146		149.9	-1.83151	-1.90647	-2.06429
150	-2.63688	-2.15623	-2.45124		150	-2.11684	-1.8146	-1.77167		150	-1.95793	-1.73776	-2.16686
150.1	-2.61278	-2.34344	-2.30674		150.1	-2.3288	-1.9748	-2.02051		150.1	-1.91258	-1.5127	-2.17873
150.2	-2.61396	-2.30255	-2.24601		150.2	-2.27819	-2.05979	-2.15242		150.2	-1.87185	-1.46521	-2.02304
150.3	-2.5356	-2.34398	-2.13625		150.3	-2.26404	-2.12178	-2.17288		150.3	-1.72716	-1.61834	-1.96894
150.4	-2.51037	-2.60326	-2.35349		150.4	-2.01226	-2.29745	-2.54165		150.4	-1.62653	-1.80009	-2.12747
150.5	-2.55216	-2.68707	-2.46959		150.5	-2.03231	-2.19574	-2.6895		150.5	-1.39822	-1.99649	-2.0441
150.6	-2.5565	-2.66602	-2.65513		150.6	-2.14809	-2.36255	-2.65325		150.6	-1.57126	-1.89342	-2.07537
150.7	-2.67986	-2.52359	-2.63587		150.7	-1.93434	-2.38196	-2.56305		150.7	-1.55215	-2.11201	-1.86326
150.8	-2.77545	-2.59908	-2.55959		150.8	-2.03276	-2.2801	-2.39757		150.8	-1.53964	-2.11683	-2.15786
150.9	-2.76042	-2.75125	-2.61087		150.9	-2.1204	-2.15755	-2.28702		150.9	-1.54478	-2.21123	-2.07754
151	-2.78602	-2.64519	-2.5147		151	-2.08742	-2.06239	-2.09332		151	-1.75451	-2.15472	-1.91438
151.1	-2.57024	-2.55604	-2.69905		151.1	-2.26449	-2.12228	-2.04357		151.1	-1.46752	-2.01369	-1.91224
151.2	-2.66191	-2.60841	-2.83851		151.2	-2.53164	-2.04914	-2.20991		151.2	-1.55707	-1.80964	-2.00121
151.3	-2.59735	-2.44031	-2.72617		151.3	-2.37564	-2.1902	-2.544		151.3	-1.37005	-2.02308	-2.05566
151.4	-2.44618	-2.54638	-2.74556		151.4	-2.41493	-2.01711	-2.47486		151.4	-1.47594	-2.206	-1.92979
151.5	-2.50961	-2.56962	-2.75966		151.5	-2.49079	-1.97916	-2.38553		151.5	-1.49796	-2.17239	-1.84841
151.6	-2.60646	-2.6941	-2.49561		151.6	-2.80576	-1.82728	-2.15462		151.6	-1.46499	-2.21064	-2.07607
151.7	-2.61107	-2.75433	-2.38233		151.7	-2.7219	-1.69973	-1.98588		151.7	-1.54749	-1.85817	-1.91907
151.8	-2.50904	-2.98018	-2.4127		151.8	-2.38812	-1.77552	-1.9803		151.8	-1.71411	-1.75125	-1.85798
151.9	-2.32625	-2.84169	-2.5285		151.9	-1.90696	-2.01638	-2.18553		151.9	-1.69821	-1.61071	-1.9315
152	-2.35239	-2.8379	-2.50734		152	-1.85952	-2.10018	-2.04705		152	-1.48205	-1.64421	-1.88029
152.1	-2.38253	-2.72842	-2.66269		152.1	-1.96945	-1.99409	-2.23047		152.1	-1.59247	-1.88093	-1.88799
152.2	-2.53962	-2.72514	-2.55834		152.2	-2.20363	-1.87793	-2.02956		152.2	-1.80946	-1.90224	-1.81519
152.3	-2.60654	-2.65413	-2.42977		152.3	-2.30755	-1.9315	-2.11851		152.3	-1.73429	-1.85687	-1.99106
152.4	-2.65496	-2.66247	-2.16071		152.4	-2.05192	-1.77976	-2.22809		152.4	-1.45998	-1.91516	-2.25732
152.5	-2.81763	-3.24075	-2.04827		152.5	-2.13142	-1.60921	-2.07262		152.5	-1.32514	-1.93954	-2.12197
152.6	-2.97033	-3.16318	-1.99455		152.6	-2.29919	-1.77006	-2.06665		152.6	-1.17584	-2.16008	-1.98407
152.7	-2.71084	-3.23994	-2.23535		152.7	-2.37248	-1.52161	-2.00873		152.7	-1.18287	-2.46088	-1.94217
152.8	-2.8565	-3.18331	-2.27872		152.8	-2.26351	-1.70138	-2.2642		152.8	-1.48652	-2.3293	-2.02871
152.9	-2.97801	-3.0558	-2.19027		152.9	-2.01471	-1.52827	-2.32344		152.9	-1.7563	-2.30477	-2.0032
153	-2.69264	-2.96694	-2.33793		153	-1.9252	-1.59283	-2.28438		153	-2.03156	-2.20712	-1.90151
153.1	-2.73208	-2.81256	-2.36453		153.1	-2.18416	-1.65581	-2.27843		153.1	-2.28493	-1.84705	-1.89179
153.2	-2.53537	-2.81045	-2.68251		153.2	-2.2228	-1.95729	-2.1579		153.2	-2.11151	-1.94539	-1.88893
153.3	-2.58446	-2.59137	-2.6782		153.3	-2.25529	-1.99784	-2.26686		153.3	-1.8934	-1.91488	-1.78894
153.4	-2.66845	-2.64287	-2.81895		153.4	-2.29299	-1.8422	-2.25299		153.4	-1.7114	-2.03358	-2.05625
153.5	-2.47429	-2.55374	-2.27439		153.5	-2.23738	-1.74968	-1.94036		153.5	-1.3565	-1.93085	-2.35035
153.6	-2.5071	-2.42441	-2.06927		153.6	-2.36075	-1.61318	-1.97004		153.6	-1.5351	-1.94011	-2.5799
153.7	-2.58155	-2.51866	-2.23403		153.7	-2.37894	-1.60698	-1.93265		153.7	-1.54745	-1.79678	-2.47978
153.8	-2.4079	-2.52336	-2.47183		153.8	-2.19184	-1.74231	-1.97089		153.8	-1.50827	-1.74493	-2.48577
153.9	-2.43471	-2.27585	-2.75273		153.9	-2.02489	-1.70983	-2.00694		153.9	-1.64559	-1.60917	-2.15173
154	-2.57424	-2.44851	-2.60605		154	-2.14327	-1.77632	-2.23498		154	-1.85615	-1.63892	-2.17358
154.1	-2.50193	-2.19266	-2.80941		154.1	-2.20274	-2.00731	-2.53757		154.1	-1.99968	-1.60563	-1.98125
154.2	-2.36514	-2.20906	-2.67656		154.2	-2.38447	-1.86185	-2.34779		154.2	-2.14457	-1.76927	-1.94365
154.3	-2.45999	-2.31986	-2.75626		154.3	-2.25986	-1.84119	-2.13598		154.3	-2.06075	-1.72998	-1.79273
154.4	-2.46798	-2.38401	-2.88901		154.4	-2.00632	-1.64443	-1.99387		154.4	-1.81577	-1.69295	-1.96546
154.5	-2.4092	-2.51076	-2.65585		154.5	-2.01604	-1.63337	-2.27863		154.5	-1.60036	-1.76441	-2.10697
154.6	-2.17112	-2.63305	-2.63395		154.6	-1.86454	-1.77482	-2.28986		154.6	-1.59226	-1.76341	-2.11874
154.7	-2.45783	-2.73951	-2.95512		154.7	-1.86461	-1.76936	-2.25175		154.7	-1.51789	-1.52026	-2.0638
154.8	-2.73651	-2.76822	-2.79785		154.8	-2.02973	-2.03534	-2.16642		154.8	-1.20858	-1.75384	-1.89121
154.9	-2.55494	-2.70094	-2.67665		154.9	-2.40994	-2.20815	-2.20498		154.9	-1.28714	-1.98082	-1.65962
155	-2.57498	-2.5838	-2.59244		155	-2.3918	-2.00497	-2.17932		155	-1.53221	-1.79192	-1.53496
155.1	-2.66872	-2.58916	-2.54493		155.1	-2.31488	-1.91704	-2.16047		155.1	-1.68499	-1.64714	-1.30278
155.2	-2.65547	-2.41325	-2.8436		155.2	-1.78116	-2.02318	-2.17722		155.2	-1.36396	-1.60177	-1.42428
155.3	-2.56755	-2.228	-2.80651		155.3	-1.94949	-2.21617	-1.89001		155.3	-1.50506	-1.71401	-1.71749
155.4	-2.35267	-2.4352	-2.69983		155.4	-1.68971	-1.84768	-1.85602		155.4	-1.61039	-1.81932	-1.71875
155.5	-2.3968	-2.24714	-2.75882		155.5	-1.87972	-1.62081	-1.78794		155.5	-1.61036	-1.82889	-1.62143
155.6	-2.64824	-2.23526	-2.8871		155.6	-2.05597	-1.6085	-2.04595		155.6	-1.63596	-1.84026	-1.6752
155.7	-2.75534	-2.65024	-2.88967		155.7	-1.93917	-1.67369	-1.93024		155.7	-1.70691	-1.9795	-1.83617
155.8	-2.66086	-2.54472	-2.64604		155.8	-2.26362	-1.48814	-1.97547		155.8	-1.64845	-1.92046	-1.9736
155.9	-2.73748	-2.48427	-2.54587		155.9	-2.30317	-1.93648	-2.12542		155.9	-1.73259	-2.12558	-1.92888
156	-2.71369	-2.6002	-2.48713		156	-2.13296	-1.90016	-1.97495		156	-1.75063	-2.31774	-2.00578
156.1	-2.52343	-2.36777	-2.48148		156.1	-2.1604	-2.16433	-1.85246		156.1	-1.72342	-2.20481	-1.85483
156.2	-2.49007	-2.40573	-2.47084		156.2	-2.29495	-2.24441	-1.91353		156.2	-1.90446	-2.14764	-1.70275
156.3	-2.68637	-2.72336	-2.54917		156.3	-2.29003	-1.9836	-2.20892		156.3	-2.07331	-1.87222	-1.91983
156.4	-2.70267	-2.76925	-2.66711		156.4	-2.12023	-2.09408	-2.0223		156.4	-1.98373	-1.76294	-1.91544
156.5	-3.20427	-2.79993	-2.55796		156.5	-2.00392	-1.9674	-2.18856		156.5	-2.04833	-1.64086	-1.76391
156.6	-2.89491	-2.72969	-2.33684		156.6	-2.14703	-2.00305	-2.21542		156.6	-2.0259	-1.78338	-1.6458
156.7	-2.73304	-2.71109	-2.49996		156.7	-2.05072	-1.71349	-2.5286		156.7	-1.90544	-1.60923	-1.55005
156.8	-2.39581	-2.41291	-2.56543		156.8	-2.10238	-1.79781	-2.35813		156.8	-1.75768	-1.72678	-1.58549
156.9	-2.39345	-2.11956	-2.11132		156.9	-1.81394	-1.73266	-2.24124		156.9	-1.53762	-1.77462	-1.46144
157	-2.40257	-2.21997	-2.06299		157	-1.89831	-1.87465	-2.07147		157	-1.52756	-1.85597	-1.61524
157.1	-2.46367	-2.20831	-1.95986		157.1	-1.84464	-1.83578	-2.01811		157.1	-1.50955	-1.60596	-1.80876
157.2	-2.33574	-2.29406	-2.07996		157.2	-2.11689	-1.60873	-2.23157		157.2	-1.19392	-1.30381	-1.67439
157.3	-2.46986	-2.40327	-2.14915		157.3	-2.27419	-1.98634	-2.18181		157.3	-1.32208	-1.45826	-1.7492
157.4	-2.63818	-2.38536	-2.04309		157.4	-2.03479	-1.87418	-2.09134		157.4	-1.50613	-1.50108	-1.96429
157.5	-2.59703	-2.59715	-2.08545		157.5	-1.96338	-1.9661	-2.13547		157.5	-1.59692	-1.20031	-1.93889
157.6	-2.42001	-2.46733	-2.49654		157.6	-1.82526	-2.07943	-1.98318		157.6	-1.64313	-1.4733	-1.62796
157.7	-2.45883	-2.5519	-2.49248		157.7	-1.67455	-2.09857	-1.91573		157.7	-1.5122	-1.77638	-1.47561
157.8	-2.47837	-2.54819	-2.4925		157.8	-1.50743	-1.81465	-1.99527		157.8	-1.72392	-1.6811	-1.38305
157.9	-2.33554	-2.775	-2.70324		157.9	-1.462	-1.78937	-1.96807		157.9	-1.61535	-1.83389	-1.70366
158	-2.42578	-2.63622	-2.53253		158	-1.31341	-2.20052	-2.04552		158	-1.48502	-1.78728	-1.92861
158.1	-2.41399	-2.46836	-2.22667		158.1	-1.29421	-2.26658	-2.01293		158.1	-1.48625	-1.6751	-1.9353
158.2	-2.3385	-2.50028	-2.24599		158.2	-1.29625	-2.29004	-1.87862		158.2	-1.53678	-1.53958	-2.07442
158.3	-2.06107	-2.42398	-2.39209		158.3	-1.30462	-2.19357	-1.90227		158.3	-1.61773	-1.54958	-1.93709
158.4	-2.06535	-2.49303	-2.37391		158.4	-1.44337	-2.00605	-1.84634		158.4	-1.84214	-1.57705	-2.02863
158.5	-2.10726	-2.27436	-2.38288		158.5	-1.56459	-1.93548	-2.06195		158.5	-1.87262	-1.51602	-2.05763
158.6	-1.99486	-2.1432	-2.347		158.6	-1.4828	-2.0281	-1.8941		158.6	-1.9017	-1.4452	-2.12929
158.7	-2.15241	-2.20315	-2.52277		158.7	-1.45815	-1.98308	-1.8617		158.7	-1.97923	-1.29674	-1.95628
158.8	-2.25393	-2.21468	-2.87521		158.8	-1.62976	-1.99914	-2.03497		158.8	-1.86629	-1.50758	-1.97383
158.9	-2.49442	-2.05991	-2.82622		158.9	-1.82645	-1.98857	-2.14224		158.9	-1.72461	-1.48036	-1.69911
159	-2.7222	-2.25107	-2.64715		159	-1.99914	-1.81207	-2.4324		159	-1.54319	-1.46329	-1.64794
159.1	-2.63369	-2.29695	-2.57697		159.1	-1.9748	-1.56759	-2.43916		159.1	-1.50556	-1.56941	-1.76504
159.2	-2.61936	-2.34698	-2.48326		159.2	-2.06392	-1.40602	-2.53044		159.2	-1.29498	-1.55588	-1.63158
159.3	-2.75614	-2.53917	-2.26807		159.3	-2.15198	-1.3822	-2.58402		159.3	-1.28143	-1.46049	-1.58013
159.4	-2.47449	-2.49077	-2.3946		159.4	-2.23857	-1.19015	-2.49063		159.4	-1.20939	-1.39575	-1.53902
159.5	-2.53918	-2.49395	-2.44649		159.5	-1.86486	-1.16816	-2.27066		159.5	-1.55938	-1.36706	-1.59255
159.6	-2.6226	-2.62332	-2.42076		159.6	-1.89419	-1.43997	-2.2537		159.6	-1.86283	-1.47878	-1.42671
159.7	-2.51762	-2.46655	-2.32539		159.7	-1.89427	-1.67812	-2.18544		159.7	-2.00983	-1.46746	-1.55326
159.8	-2.72783	-2.30415	-2.1299		159.8	-1.96847	-1.74178	-2.2411		159.8	-1.78261	-1.45137	-1.80979
159.9	-2.82067	-2.65375	-2.22626		159.9	-2.09367	-2.09857	-2.05578		159.9	-2.02557	-1.59594	-1.79907
160	-2.66196	-2.52348	-2.26628		160	-2.09573	-2.27365	-1.88241		160	-2.16965	-1.98624	-1.82125
160.1	-2.7149	-2.69598	-2.2865		160.1	-2.07762	-2.11508	-1.96678		160.1	-1.90116	-1.92159	-1.73335
160.2	-2.97128	-2.59646	-2.24083		160.2	-2.08714	-1.9493	-1.82199		160.2	-1.60051	-1.95218	-1.74011
160.3	-2.92881	-2.56312	-2.08237		160.3	-2.20208	-1.7847	-1.81767		160.3	-1.64594	-1.91539	-1.75597
160.4	-2.85809	-2.58777	-2.08351		160.4	-2.01128	-1.86636	-1.82145		160.4	-1.54148	-1.74216	-1.89404
160.5	-3.01529	-2.40097	-2.118		160.5	-2.07326	-1.624	-1.82528		160.5	-1.75663	-1.61109	-1.96022
160.6	-2.70387	-2.4174	-2.14217		160.6	-1.91911	-1.63537	-1.80164		160.6	-1.41829	-1.56087	-2.10092
160.7	-2.81372	-2.44685	-1.98016		160.7	-1.94663	-1.61783	-2.08534		160.7	-1.40733	-1.16919	-1.8019
160.8	-3.02471	-2.29924	-2.16322		160.8	-2.00792	-1.83368	-2.35227		160.8	-1.49579	-1.11716	-1.84764
160.9	-2.93899	-2.3699	-2.36241		160.9	-2.21219	-1.97673	-2.21073		160.9	-1.35187	-1.10723	-2.11508
161	-2.63083	-2.31217	-2.52722		161	-2.0986	-1.84061	-2.30377		161	-1.36255	-1.4377	-2.25681
161.1	-2.50718	-2.40749	-2.50403		161.1	-2.01311	-2.03216	-2.28986		161.1	-1.4646	-1.58439	-2.2773
161.2	-2.45531	-2.48987	-2.24255		161.2	-1.82728	-2.02272	-2.24553		161.2	-1.32955	-1.48995	-2.22692
161.3	-2.70032	-2.54717	-2.13664		161.3	-2.2284	-2.09318	-2.18838		161.3	-1.46404	-1.54813	-1.95415
161.4	-2.31395	-2.73614	-2.18659		161.4	-2.10165	-2.06698	-2.22801		161.4	-1.46645	-1.51775	-2.03062
161.5	-2.27192	-2.35054	-2.12264		161.5	-2.08356	-1.79977	-2.22251		161.5	-1.57725	-1.70544	-1.50085
161.6	-2.3979	-2.2515	-2.32938		161.6	-2.10955	-1.60294	-2.09226		161.6	-1.79798	-1.65663	-1.49489
161.7	-2.21203	-2.13134	-2.39475		161.7	-1.79411	-1.62427	-1.99102		161.7	-1.72239	-1.52413	-1.37069
161.8	-2.35871	-2.14768	-2.37557		161.8	-1.75274	-1.69529	-1.90216		161.8	-1.58741	-1.39398	-1.51942
161.9	-2.40405	-2.25962	-2.42401		161.9	-1.83445	-1.70721	-1.85001		161.9	-1.45993	-1.32491	-1.7731
162	-2.49349	-2.1864	-2.64083		162	-2.09622	-2.01541	-1.99494		162	-1.33262	-1.35259	-1.76551
162.1	-2.62458	-2.03042	-2.4122		162.1	-2.01076	-2.06596	-2.0235		162.1	-1.46507	-1.53689	-1.76456
162.2	-2.68484	-2.30135	-2.08326		162.2	-2.25506	-2.03961	-2.12457		162.2	-1.44889	-1.5684	-1.85989
162.3	-2.47971	-2.40954	-1.79402		162.3	-2.26972	-2.16505	-2.24126		162.3	-1.57086	-1.61298	-1.78285
162.4	-2.13155	-2.59026	-1.84776		162.4	-2.36901	-2.06275	-2.14691		162.4	-1.75716	-1.90081	-1.86188
162.5	-2.09092	-2.52482	-1.8554		162.5	-2.09471	-2.10324	-2.40681		162.5	-1.76709	-1.93925	-1.86491
162.6	-2.04327	-2.64351	-1.7805		162.6	-2.12786	-2.04019	-2.58156		162.6	-1.88585	-1.762	-1.84307
162.7	-1.92965	-2.74206	-1.9429		162.7	-2.12553	-1.93814	-2.36977		162.7	-1.85973	-1.73884	-1.98996
162.8	-2.09952	-2.57798	-1.96195		162.8	-1.98869	-1.92399	-2.20926		162.8	-1.73266	-2.0079	-2.14003
162.9	-2.10658	-2.24633	-1.87818		162.9	-2.09405	-2.28515	-2.1763		162.9	-1.77286	-2.04618	-2.02301
163	-1.95104	-2.32071	-2.02353		163	-2.08458	-2.07468	-2.23914		163	-1.97817	-2.17438	-2.13342
163.1	-1.91571	-2.25561	-2.28891		163.1	-2.10801	-1.92624	-2.28584		163.1	-1.80301	-2.06701	-2.14786
163.2	-1.90954	-2.17028	-2.28819		163.2	-1.89879	-2.02988	-2.4769		163.2	-1.75208	-1.86113	-2.20058
163.3	-1.93994	-2.06311	-2.17908		163.3	-1.95507	-1.83226	-2.35222		163.3	-1.87643	-1.91968	-2.14049
163.4	-2.18873	-2.31909	-2.17418		163.4	-2.01562	-2.00626	-2.22435		163.4	-2.10468	-2.0538	-1.9285
163.5	-2.21587	-2.50584	-2.27476		163.5	-1.97304	-2.2473	-2.03603		163.5	-2.18376	-1.95331	-1.88162
163.6	-2.41155	-2.77833	-2.0839		163.6	-1.80241	-2.02855	-1.78009		163.6	-2.26713	-1.87869	-1.82703
163.7	-2.40503	-2.751	-2.23589		163.7	-1.79734	-1.82784	-1.84464		163.7	-1.87312	-1.64548	-1.77179
163.8	-2.14297	-2.55534	-2.22383		163.8	-1.97524	-1.85509	-1.97212		163.8	-1.91133	-1.49665	-1.69556
163.9	-2.20758	-2.45699	-1.95103		163.9	-1.98743	-1.85824	-2.13875		163.9	-1.80569	-1.48835	-1.66087
164	-1.9879	-2.36524	-1.9156		164	-1.99356	-1.96469	-1.95953		164	-1.6708	-1.46649	-1.80752
164.1	-1.9963	-2.40943	-2.14647		164.1	-2.1686	-1.80828	-2.09346		164.1	-1.81422	-1.34211	-1.77516
164.2	-1.71331	-2.22274	-2.28051		164.2	-2.07057	-1.68743	-2.20207		164.2	-1.91435	-1.46691	-1.84311
164.3	-1.80128	-2.11803	-2.21541		164.3	-2.23639	-1.63432	-1.9594		164.3	-1.65418	-1.28993	-1.69078
164.4	-1.90021	-1.96403	-2.11152		164.4	-1.98098	-1.72223	-2.09506		164.4	-1.81186	-1.22636	-1.70352
164.5	-1.98262	-1.85343	-2.34741		164.5	-2.15997	-1.94593	-2.35956		164.5	-1.96609	-1.40417	-1.60353
164.6	-1.92332	-1.87233	-2.37945		164.6	-2.09831	-1.89425	-2.21087		164.6	-2.01154	-1.29613	-1.63976
164.7	-2.01112	-1.7844	-2.21486		164.7	-2.16288	-1.65768	-2.11546		164.7	-1.88315	-1.53964	-1.49425
164.8	-2.28099	-1.96936	-2.21283		164.8	-2.17086	-1.84446	-2.02526		164.8	-1.88811	-1.34923	-1.30994
164.9	-2.25269	-2.03868	-2.00565		164.9	-1.88608	-1.7866	-1.81627		164.9	-1.89398	-1.47382	-1.40511
165	-2.29996	-2.00453	-1.91786		165	-2.09035	-1.89032	-1.84805		165	-1.87805	-1.34076	-1.5844
165.1	-2.25825	-2.02108	-1.92108		165.1	-2.23274	-1.74436	-1.82926		165.1	-1.85571	-1.24018	-1.6173
165.2	-2.25297	-2.03239	-2.17291		165.2	-2.34681	-1.6952	-1.88578		165.2	-1.74713	-1.32502	-1.65666
165.3	-2.18432	-2.33415	-2.31553		165.3	-2.15159	-1.63602	-1.97934		165.3	-1.86938	-1.53436	-1.87143
165.4	-2.25505	-2.35127	-2.26369		165.4	-2.14727	-1.73693	-1.89918		165.4	-2.07718	-1.57288	-1.93845
165.5	-1.93596	-2.35107	-2.4752		165.5	-2.06528	-1.84071	-1.8555		165.5	-1.81764	-1.57891	-2.14997
165.6	-2.05206	-2.21086	-2.32844		165.6	-2.02708	-1.94128	-1.62585		165.6	-1.62482	-1.49945	-2.02637
165.7	-2.10344	-2.34653	-2.10071		165.7	-2.06381	-1.89373	-1.56016		165.7	-1.60941	-1.38473	-1.98361
165.8	-2.37099	-2.0547	-2.29893		165.8	-2.00258	-1.68893	-1.77692		165.8	-1.43602	-1.42332	-2.13741
165.9	-2.33089	-2.25735	-2.38316		165.9	-2.03307	-1.67222	-1.79068		165.9	-1.66395	-1.24621	-2.1044
166	-2.42438	-2.54944	-2.30589		166	-1.97319	-1.5503	-1.98784		166	-1.71736	-1.25772	-1.85373
166.1	-2.42977	-2.31095	-2.31554		166.1	-1.80727	-1.84623	-2.1884		166.1	-1.75507	-1.37701	-1.82845
166.2	-2.43427	-2.48778	-2.52294		166.2	-1.61678	-2.16193	-1.85546		166.2	-1.8268	-1.50393	-1.69785
166.3	-2.21545	-2.32388	-2.47318		166.3	-1.58733	-2.00763	-1.86405		166.3	-1.75004	-1.70292	-1.53394
166.4	-2.22083	-2.25759	-2.50977		166.4	-1.40045	-2.0071	-1.9206		166.4	-1.85125	-1.62825	-1.47566
166.5	-2.20409	-2.26233	-2.40247		166.5	-1.75303	-2.11216	-1.86981		166.5	-1.79801	-1.54417	-1.68885
166.6	-2.03574	-2.42879	-2.29503		166.6	-1.93609	-1.71512	-1.87624		166.6	-1.67688	-1.49159	-1.7612
166.7	-1.9186	-2.16995	-1.94392		166.7	-2.2245	-1.74409	-1.94959		166.7	-1.95353	-1.34583	-1.7327
166.8	-2.2292	-2.12083	-1.80616		166.8	-2.22699	-2.00697	-1.82873		166.8	-1.93361	-1.58011	-1.67159
166.9	-2.37281	-2.06337	-1.95938		166.9	-2.32876	-1.84603	-1.92594		166.9	-1.85108	-1.77096	-1.45092
167	-2.2159	-2.03103	-1.88308		167	-2.28524	-1.99931	-2.02235		167	-1.92452	-1.48481	-1.53095
167.1	-2.0001	-1.98239	-1.82714		167.1	-2.50491	-1.92793	-2.20554		167.1	-1.97717	-1.53259	-1.55348
167.2	-1.85688	-1.99362	-1.9507		167.2	-2.26577	-1.743	-2.29156		167.2	-1.81394	-1.65929	-1.74276
167.3	-1.98953	-2.18656	-2.1874		167.3	-2.28001	-2.01948	-2.09415		167.3	-1.87925	-1.44883	-1.70769
167.4	-1.99546	-2.40251	-2.26542		167.4	-2.00541	-1.90904	-1.88329		167.4	-1.70113	-1.50758	-1.86909
167.5	-2.00639	-2.46655	-2.08738		167.5	-2.20449	-2.05296	-1.82513		167.5	-1.86207	-1.6353	-1.82965
167.6	-2.28212	-2.45816	-2.11757		167.6	-2.296	-1.86753	-1.71705		167.6	-1.56976	-1.69792	-1.84131
167.7	-2.24811	-2.52821	-2.4073		167.7	-2.32325	-1.84184	-1.93886		167.7	-1.47912	-1.79252	-1.80062
167.8	-2.50465	-2.43896	-2.68133		167.8	-1.98986	-1.62673	-2.01143		167.8	-1.47276	-1.72338	-1.71587
167.9	-2.2695	-2.3633	-2.58602		167.9	-1.85973	-1.666	-1.80749		167.9	-1.66645	-1.56428	-1.44407
168	-2.24436	-2.21593	-2.55401		168	-1.54263	-1.6069	-1.84285		168	-1.62971	-1.66981	-1.62947
168.1	-2.29098	-1.92269	-2.5995		168.1	-1.62537	-1.49063	-1.9773		168.1	-1.78082	-1.58361	-1.721
168.2	-2.20741	-1.90267	-2.53835		168.2	-1.51778	-1.57652	-1.86477		168.2	-1.90312	-1.66366	-1.76085
168.3	-2.16486	-1.93016	-2.4006		168.3	-1.67617	-1.54064	-1.84874		168.3	-1.86765	-1.74823	-1.40935
168.4	-2.27915	-2.00312	-2.16742		168.4	-1.67812	-1.57739	-1.81943		168.4	-1.65263	-1.73655	-1.57541
168.5	-2.14619	-1.96056	-2.18786		168.5	-1.60079	-1.54875	-2.06145		168.5	-1.73936	-1.81206	-1.55124
168.6	-2.15978	-1.86942	-2.18567		168.6	-1.64838	-1.99889	-2.14067		168.6	-1.48175	-1.63848	-1.85803
168.7	-2.50439	-1.87542	-2.04202		168.7	-1.85854	-2.15715	-1.99823		168.7	-1.57425	-1.81444	-2.19779
168.8	-2.65898	-2.26543	-2.23202		168.8	-2.16857	-2.18014	-1.86059		168.8	-1.86549	-1.89698	-1.98403
168.9	-2.51275	-2.23462	-2.28993		168.9	-2.08109	-2.05432	-2.04595		168.9	-2.04199	-1.96202	-1.95295
169	-2.44671	-2.12032	-2.29433		169	-1.97801	-1.91201	-1.87009		169	-1.98788	-1.85166	-1.56276
169.1	-2.35882	-1.91858	-2.25238		169.1	-2.04375	-1.86315	-1.87642		169.1	-1.96012	-1.85017	-1.28737
169.2	-2.49588	-1.8371	-2.17378		169.2	-2.34431	-1.62472	-1.90458		169.2	-1.84968	-2.09302	-1.36846
169.3	-2.47209	-1.92777	-2.2951		169.3	-2.22842	-1.6768	-2.17181		169.3	-1.64471	-1.96806	-1.55122
169.4	-2.46186	-1.93948	-2.16601		169.4	-1.8454	-1.79647	-2.16399		169.4	-1.3949	-1.63406	-1.36675
169.5	-2.43996	-2.1629	-1.98029		169.5	-1.78342	-2.02397	-2.08219		169.5	-1.47022	-1.67371	-1.40782
169.6	-2.64743	-2.39978	-1.9868		169.6	-1.83768	-1.83846	-2.20258		169.6	-1.6283	-1.76302	-1.24366
169.7	-2.56246	-2.29576	-1.93277		169.7	-1.97478	-1.74742	-2.0735		169.7	-1.93744	-1.73963	-1.3928
169.8	-2.52232	-2.27891	-1.88992		169.8	-2.08535	-1.69026	-2.20182		169.8	-1.98012	-1.92533	-1.48255
169.9	-2.44583	-2.13934	-2.03214		169.9	-2.08849	-1.59158	-1.96988		169.9	-1.93779	-1.85375	-1.77114
170	-2.15406	-2.26623	-2.14903		170	-1.98388	-1.4933	-1.98273		170	-2.08292	-1.63187	-1.6948
170.1	-2.27983	-2.13291	-2.38004		170.1	-2.08073	-1.29605	-1.7736		170.1	-2.01665	-1.43275	-1.73171
170.2	-2.18825	-2.06849	-2.17179		170.2	-1.88845	-1.38032	-1.80503		170.2	-1.89894	-1.45658	-1.75503
170.3	-2.05206	-2.40839	-2.16001		170.3	-1.81942	-1.31432	-1.63773		170.3	-1.75565	-1.47441	-1.51417
170.4	-1.87979	-2.22843	-1.9265		170.4	-1.78692	-1.43161	-1.82939		170.4	-1.93505	-1.11473	-1.47434
170.5	-2.04295	-2.14077	-2.11236		170.5	-1.80996	-1.40917	-1.7306		170.5	-1.9027	-1.10737	-1.66284
170.6	-1.91794	-2.14205	-2.2023		170.6	-2.03252	-1.54429	-1.75422		170.6	-1.77852	-1.28369	-1.73718
170.7	-2.15938	-2.1139	-2.07903		170.7	-1.93244	-1.67292	-1.96192		170.7	-1.64463	-1.14497	-1.617
170.8	-2.40245	-2.20448	-2.00957		170.8	-1.85834	-1.71506	-2.10539		170.8	-1.62767	-1.07662	-1.66713
170.9	-2.24807	-2.13281	-2.28418		170.9	-1.96806	-1.78126	-2.01811		170.9	-1.47516	-1.28027	-1.64028
171	-2.52453	-2.21885	-2.53587		171	-1.89844	-1.73172	-1.81303		171	-1.38471	-1.34316	-1.66249
171.1	-2.62903	-2.21814	-2.42783		171.1	-2.07559	-1.82911	-1.89705		171.1	-1.32424	-1.14758	-1.5979
171.2	-2.72964	-2.09917	-2.60949		171.2	-1.84283	-1.78588	-1.81238		171.2	-1.40837	-1.14383	-1.49072
171.3	-2.77037	-2.36128	-2.59202		171.3	-1.72802	-1.65995	-2.0439		171.3	-1.62007	-1.20291	-1.37977
171.4	-2.73576	-2.47811	-2.54908		171.4	-1.95523	-1.68041	-2.15872		171.4	-1.71366	-1.31005	-1.45828
171.5	-2.63995	-2.38975	-2.53023		171.5	-2.06184	-1.81556	-1.99644		171.5	-1.39484	-1.38121	-1.61738
171.6	-2.49959	-2.29471	-2.80557		171.6	-2.06755	-1.65122	-1.97892		171.6	-1.48783	-1.76789	-1.73023
171.7	-2.41893	-2.14679	-2.66644		171.7	-2.02063	-1.48269	-1.94796		171.7	-1.55538	-1.59579	-1.78186
171.8	-2.51869	-2.20296	-2.59584		171.8	-1.90772	-1.37381	-1.83593		171.8	-1.24485	-1.42607	-1.95283
171.9	-2.45522	-1.95052	-2.46102		171.9	-1.94084	-1.4104	-2.01289		171.9	-1.32903	-1.46617	-1.96571
172	-2.65846	-2.10806	-2.34694		172	-1.98139	-1.71574	-1.85342		172	-1.32334	-1.39855	-1.85575
172.1	-2.53623	-2.01582	-2.2448		172.1	-1.98559	-1.54955	-1.95366		172.1	-1.40465	-1.4273	-2.01377
172.2	-2.34448	-2.28477	-2.13774		172.2	-1.85599	-1.49792	-1.76351		172.2	-1.38774	-1.56559	-1.84505
172.3	-2.50752	-2.19525	-2.28428		172.3	-1.91965	-1.43845	-2.04867		172.3	-1.43141	-1.75498	-1.84576
172.4	-2.11775	-2.02646	-2.28455		172.4	-2.13487	-1.44391	-2.18008		172.4	-1.4298	-1.80753	-1.68252
172.5	-2.10314	-1.89987	-2.24447		172.5	-2.36608	-1.1669	-2.26168		172.5	-1.5071	-1.88459	-1.51619
172.6	-2.05003	-2.05387	-2.1819		172.6	-2.22264	-1.31935	-2.28151		172.6	-1.39836	-1.78721	-1.70637
172.7	-2.06781	-2.16782	-1.96311		172.7	-2.10313	-1.31392	-2.13789		172.7	-1.34989	-1.6064	-1.72063
172.8	-2.13932	-2.07894	-2.07114		172.8	-2.05044	-1.25706	-1.96135		172.8	-1.27502	-1.60438	-1.55555
172.9	-2.13152	-2.01213	-2.04087		172.9	-1.94995	-1.52724	-1.90296		172.9	-1.22101	-1.46115	-1.49414
173	-2.09888	-2.06539	-2.30796		173	-1.76627	-1.74456	-2.10407		173	-1.269	-1.18272	-1.46981
173.1	-2.25163	-1.87055	-2.37925		173.1	-1.7853	-1.70075	-2.03546		173.1	-1.63624	-1.27094	-1.50986
173.2	-2.14899	-2.13693	-2.57254		173.2	-1.97061	-1.61417	-2.04893		173.2	-1.74879	-1.37649	-1.54488
173.3	-2.45943	-2.27137	-2.44645		173.3	-1.84953	-1.76636	-1.93915		173.3	-1.82379	-1.48487	-1.61874
173.4	-2.55092	-2.3993	-2.42688		173.4	-1.85779	-1.75336	-1.93733		173.4	-1.72624	-1.56112	-1.64245
173.5	-2.50525	-2.18371	-2.21409		173.5	-2.07304	-1.59789	-2.0591		173.5	-1.47661	-1.61817	-1.78967
173.6	-2.52021	-2.29202	-2.16197		173.6	-1.94	-1.51811	-1.96213		173.6	-1.65651	-1.79728	-1.8251
173.7	-2.41271	-1.7559	-2.05313		173.7	-2.38127	-1.72541	-1.86163		173.7	-1.54786	-1.96779	-1.68963
173.8	-2.27422	-2.10814	-1.97509		173.8	-2.05675	-1.61117	-1.77491		173.8	-1.51088	-2.23048	-1.85158
173.9	-2.1389	-2.11305	-2.02613		173.9	-2.02956	-1.80009	-1.99229		173.9	-1.62748	-2.26438	-1.70997
174	-2.1616	-2.0995	-2.18639		174	-1.85458	-1.72685	-2.08384		174	-1.63566	-2.11539	-1.70259
174.1	-2.28169	-2.14947	-2.21451		174.1	-1.67779	-1.84189	-2.42225		174.1	-1.65761	-2.06284	-2.02476
174.2	-2.46161	-2.16485	-2.0787		174.2	-1.47998	-2.26096	-2.27175		174.2	-1.46027	-1.7067	-1.8022
174.3	-2.28311	-2.19563	-1.93572		174.3	-1.3933	-2.17641	-1.89696		174.3	-1.31992	-1.80954	-1.84076
174.4	-1.98281	-2.2829	-1.93243		174.4	-1.45263	-1.98307	-1.93973		174.4	-1.34341	-1.81031	-2.02574
174.5	-2.18479	-2.0605	-1.95952		174.5	-1.59851	-1.73582	-1.88134		174.5	-1.29515	-1.40746	-1.96531
174.6	-2.15212	-2.03768	-2.19271		174.6	-1.82303	-1.55357	-1.84009		174.6	-1.11495	-1.38303	-1.84178
174.7	-2.19283	-2.07439	-1.99887		174.7	-1.77239	-1.43908	-2.07561		174.7	-1.21979	-1.39303	-1.78766
174.8	-2.2653	-2.0416	-1.89356		174.8	-2.29374	-1.39662	-1.98667		174.8	-1.16839	-1.22163	-1.75441
174.9	-2.15947	-2.08095	-1.70139		174.9	-2.19923	-1.28473	-2.23887		174.9	-1.42271	-1.29467	-1.69124
175	-2.43993	-2.21178	-1.90655		175	-2.03622	-1.40887	-2.03983		175	-1.68109	-1.48823	-1.77295
175.1	-2.43183	-2.3098	-2.24331		175.1	-2.08389	-1.68552	-2.012		175.1	-1.64246	-1.76706	-1.79118
175.2	-2.30554	-2.40717	-2.25789		175.2	-1.98112	-1.57876	-2.04495		175.2	-1.57023	-1.68143	-2.00349
175.3	-2.16466	-2.26569	-2.07737		175.3	-1.64624	-1.55564	-1.84957		175.3	-1.5188	-1.59489	-2.18687
175.4	-2.26469	-2.25282	-2.25512		175.4	-1.56825	-1.75671	-1.79832		175.4	-1.56707	-1.82366	-2.00563
175.5	-2.13384	-2.41852	-2.32764		175.5	-1.49411	-1.64246	-1.847		175.5	-1.54308	-1.78286	-2.04377
175.6	-2.26312	-2.2804	-2.5293		175.6	-1.57605	-1.82211	-1.93422		175.6	-1.49335	-1.54011	-1.88498
175.7	-2.01622	-2.30195	-2.44753		175.7	-1.78995	-1.67927	-2.04318		175.7	-1.37485	-1.43062	-1.91534
175.8	-1.93467	-2.32346	-1.91747		175.8	-1.7406	-1.46967	-2.14182		175.8	-1.36118	-1.3005	-1.72973
175.9	-2.14178	-2.11007	-1.8898		175.9	-1.8025	-1.67358	-2.23304		175.9	-1.28396	-1.5935	-1.54778
176	-2.07391	-1.95041	-2.02864		176	-1.30549	-1.44922	-2.46091		176	-1.52572	-1.62143	-1.51285
176.1	-2.134	-1.83978	-1.91148		176.1	-1.56057	-1.57408	-2.21602		176.1	-1.44629	-1.45992	-1.59545
176.2	-2.33437	-1.81561	-1.85623		176.2	-1.73357	-1.64436	-2.09421		176.2	-1.38309	-1.52782	-1.35136
176.3	-2.28382	-1.82294	-2.16151		176.3	-1.72946	-1.52677	-1.9722		176.3	-1.17948	-1.30976	-1.65591
176.4	-2.39712	-1.66945	-1.93306		176.4	-1.56019	-1.76578	-1.87688		176.4	-1.28736	-1.47445	-1.79752
176.5	-2.28336	-1.53484	-1.98595		176.5	-1.76295	-1.51756	-1.97627		176.5	-1.45463	-1.59044	-1.84304
176.6	-2.10267	-1.60091	-1.77446		176.6	-2.0569	-1.39936	-1.93715		176.6	-1.41384	-1.43489	-1.84826
176.7	-1.94974	-1.77542	-1.93069		176.7	-1.86254	-1.5475	-2.01635		176.7	-1.41144	-1.52625	-1.65809
176.8	-2.13623	-2.0349	-2.03984		176.8	-1.80413	-1.70911	-1.97834		176.8	-1.62935	-1.9899	-1.64202
176.9	-2.29661	-2.02133	-2.16864		176.9	-1.7535	-1.73282	-1.99358		176.9	-1.63824	-1.71557	-1.68909
177	-2.37856	-1.80626	-1.85753		177	-1.76946	-1.86064	-1.79679		177	-1.60782	-1.66455	-1.93979
177.1	-2.14699	-2.06647	-1.91934		177.1	-1.7434	-1.68859	-1.66997		177.1	-1.64578	-1.70353	-1.91243
177.2	-2.12536	-2.20761	-2.05181		177.2	-1.58464	-1.50833	-1.51218		177.2	-1.29585	-1.85135	-1.85111
177.3	-1.91817	-2.44569	-2.08148		177.3	-1.45929	-1.66775	-1.43015		177.3	-1.1667	-1.74521	-2.06035
177.4	-2.21352	-2.39048	-2.22558		177.4	-1.52775	-1.62246	-1.48057		177.4	-0.846954	-1.72035	-1.99955
177.5	-2.31072	-2.21956	-2.28562		177.5	-1.8058	-1.52665	-1.62684		177.5	-1.18884	-1.79817	-1.70581
177.6	-2.07592	-1.86042	-2.1827		177.6	-1.79426	-1.41384	-1.95624		177.6	-1.24312	-1.65464	-1.54389
177.7	-2.00028	-1.8357	-2.23026		177.7	-2.03886	-1.49385	-2.21427		177.7	-1.20975	-1.39093	-1.70467
177.8	-1.99612	-1.56574	-2.06245		177.8	-1.8835	-1.28758	-2.21439		177.8	-1.20283	-1.52289	-1.85726
177.9	-2.02613	-1.92377	-2.14508		177.9	-1.68555	-1.36952	-1.85784		177.9	-1.56084	-1.49177	-1.77259
178	-1.86096	-2.02282	-1.95138		178	-1.64859	-1.36729	-1.61934		178	-1.69894	-1.60075	-1.80295
178.1	-1.67541	-2.04158	-1.94524		178.1	-1.71903	-1.70665	-1.57005		178.1	-1.64849	-1.3975	-2.0373
178.2	-1.61853	-1.9885	-2.14747		178.2	-1.76275	-1.60764	-1.29413		178.2	-1.64105	-1.41867	-1.8768
178.3	-1.75791	-2.03369	-2.23504		178.3	-1.73544	-1.41245	-1.27354		178.3	-1.58972	-1.59204	-1.71817
178.4	-1.64849	-1.917	-2.02374		178.4	-1.74103	-1.49707	-1.17457		178.4	-1.75803	-1.45634	-1.51688
178.5	-1.80717	-1.8923	-2.24989		178.5	-1.84106	-1.7409	-1.43911		178.5	-1.53574	-1.3815	-1.45203
178.6	-1.98654	-2.11816	-2.25891		178.6	-1.9797	-1.61181	-1.65456		178.6	-1.67791	-1.56798	-1.37221
178.7	-2.03631	-2.37392	-2.02537		178.7	-2.24641	-1.70305	-1.52479		178.7	-1.62003	-1.48009	-1.42556
178.8	-1.93388	-2.53269	-2.0171		178.8	-2.35006	-1.99444	-1.64101		178.8	-1.7028	-1.6073	-1.20534
178.9	-1.90239	-2.42383	-2.01521		178.9	-2.23739	-1.78487	-1.58458		178.9	-1.75529	-1.83334	-1.22649
179	-1.89476	-2.28869	-2.01593		179	-1.92096	-1.91329	-1.50118		179	-1.73034	-1.77126	-1.32687
179.1	-1.83885	-2.07168	-1.73351		179.1	-1.78048	-1.91578	-1.53267		179.1	-1.5569	-1.76548	-1.53622
179.2	-1.70092	-2.13656	-2.00974		179.2	-1.75607	-1.71331	-1.56481		179.2	-1.47949	-1.57183	-1.52371
179.3	-1.82464	-2.36901	-2.13971		179.3	-1.54948	-1.62	-1.53238		179.3	-1.43165	-1.56367	-1.46066
179.4	-1.82942	-2.37502	-2.06565		179.4	-1.64582	-1.45242	-1.67802		179.4	-1.24323	-1.51839	-1.63467
179.5	-1.8361	-2.33302	-2.16514		179.5	-1.73085	-1.47597	-1.63764		179.5	-1.25904	-1.31548	-1.9171
179.6	-1.96018	-2.2221	-1.9519		179.6	-1.72878	-1.43894	-1.8241		179.6	-1.41401	-1.14611	-1.99916
179.7	-1.99977	-1.91844	-1.97875		179.7	-1.75496	-1.56927	-1.70532		179.7	-1.47347	-1.37692	-1.96482
179.8	-2.06604	-1.94186	-1.56129		179.8	-1.70029	-1.64924	-2.00727		179.8	-1.41099	-1.55282	-1.87094
179.9	-2.25344	-1.69873	-1.54637		179.9	-1.98927	-1.73419	-2.07768		179.9	-1.48249	-1.52199	-1.85288
180	-1.83044	-1.75832	-1.544		180	-2.02505	-1.73959	-1.87384		180	-1.75285	-1.60811	-1.87598
180.1	-1.57742	-2.17681	-1.4836		180.1	-2.22857	-1.74447	-1.6918		180.1	-1.8437	-1.5964	-1.77618
180.2	-1.48169	-2.3006	-1.86296		180.2	-2.10786	-1.65021	-1.81201		180.2	-1.74336	-1.86958	-1.63991
180.3	-1.77023	-2.36316	-1.93547		180.3	-2.36265	-1.2862	-1.71148		180.3	-1.78536	-1.94246	-1.52564
180.4	-2.03653	-2.55026	-1.93443		180.4	-2.05318	-1.39813	-1.65494		180.4	-1.64742	-1.54454	-1.51766
180.5	-2.2028	-2.32399	-2.09652		180.5	-1.96009	-1.5892	-1.54463		180.5	-1.50976	-1.33225	-1.47603
180.6	-2.29612	-2.18797	-2.12723		180.6	-1.8809	-1.66262	-1.42015		180.6	-1.74238	-0.980056	-1.62956
180.7	-2.23696	-2.10689	-2.04408		180.7	-1.672	-1.63881	-1.72134		180.7	-1.60643	-1.25488	-1.7888
180.8	-2.21137	-2.08767	-2.07408		180.8	-1.67045	-1.71899	-1.56235		180.8	-1.67553	-1.2097	-1.82647
180.9	-2.08531	-2.15962	-2.19283		180.9	-1.71735	-1.92379	-1.74229		180.9	-1.40717	-1.59075	-2.02105
181	-1.8919	-2.08549	-2.14044		181	-1.8399	-2.0149	-1.63183		181	-1.51394	-1.59083	-1.91074
181.1	-2.00943	-2.04407	-2.0948		181.1	-2.03812	-1.74293	-1.59766		181.1	-1.64902	-1.4292	-1.65684
181.2	-1.93096	-2.12536	-2.01766		181.2	-1.70636	-1.78097	-1.74539		181.2	-1.45676	-1.575	-1.52914
181.3	-1.86388	-2.1214	-2.1615		181.3	-1.70747	-1.63598	-1.95031		181.3	-1.56628	-1.61398	-1.58805
181.4	-1.96616	-1.96077	-2.17714		181.4	-1.46183	-1.78756	-1.80303		181.4	-1.58454	-1.51464	-1.57316
181.5	-2.13638	-2.12949	-1.83602		181.5	-1.37511	-1.71702	-1.69939		181.5	-1.66273	-1.43432	-1.43912
181.6	-2.10673	-1.87832	-2.0464		181.6	-1.59809	-1.79881	-1.79838		181.6	-1.78246	-1.47559	-1.41017
181.7	-2.12261	-1.78455	-1.94027		181.7	-1.83502	-2.11776	-1.99414		181.7	-1.63388	-1.34889	-1.59983
181.8	-2.37486	-1.63421	-1.8146		181.8	-1.96459	-1.96489	-1.87663		181.8	-1.88772	-1.38386	-1.48543
181.9	-2.40412	-1.52905	-2.08083		181.9	-1.75503	-1.74278	-1.76524		181.9	-1.77024	-1.34328	-1.65781
182	-2.20808	-1.76498	-2.23487		182	-1.72257	-1.48202	-1.78721		182	-1.69211	-1.39206	-1.49959
182.1	-2.43883	-1.93732	-2.22199		182.1	-1.88602	-1.79272	-1.72741		182.1	-1.50882	-1.39259	-1.80405
182.2	-2.57056	-1.93036	-2.41491		182.2	-1.82604	-1.54592	-1.57842		182.2	-1.65476	-1.45652	-1.68701
182.3	-2.42715	-1.9077	-2.24515		182.3	-1.61602	-1.63385	-1.718		182.3	-1.54957	-1.60282	-1.77269
182.4	-2.21809	-2.18533	-1.89224		182.4	-1.36309	-1.65029	-1.50678		182.4	-1.44845	-2.0979	-1.79869
182.5	-2.39662	-2.16945	-1.50213		182.5	-1.576	-1.46632	-1.50782		182.5	-1.44131	-1.90622	-1.77056
182.6	-2.23671	-2.5232	-1.44026		182.6	-1.85119	-1.50163	-1.3326		182.6	-1.39912	-2.02104	-1.82635
182.7	-2.09868	-2.46167	-1.48301		182.7	-1.78767	-1.4998	-1.53454		182.7	-1.29876	-1.73269	-1.52094
182.8	-2.12869	-2.6685	-1.68195		182.8	-1.50256	-1.2729	-1.75821		182.8	-1.40829	-1.71201	-1.935
182.9	-1.82148	-2.60217	-2.01125		182.9	-1.66566	-1.28197	-1.93379		182.9	-1.14717	-1.68408	-1.77371
183	-1.8169	-2.62416	-2.12639		183	-2.02261	-1.28516	-1.88421		183	-1.54842	-1.6823	-1.53445
183.1	-1.73619	-2.19217	-1.92557		183.1	-2.17099	-1.26049	-1.87973		183.1	-1.53897	-1.55538	-1.54177
183.2	-1.64885	-2.24786	-1.69444		183.2	-2.40417	-1.29884	-1.84452		183.2	-1.563	-1.55463	-1.74433
183.3	-1.75889	-1.89023	-1.859		183.3	-2.22079	-1.49902	-1.99013		183.3	-1.61323	-1.34872	-1.76322
183.4	-1.93654	-1.85039	-2.02318		183.4	-2.10816	-1.72856	-2.0432		183.4	-1.73647	-1.49615	-1.82541
183.5	-2.00629	-2.03309	-2.14397		183.5	-2.10931	-1.65796	-1.79538		183.5	-1.85163	-1.32654	-1.81231
183.6	-1.67551	-2.02957	-2.26286		183.6	-2.12957	-1.66788	-1.83479		183.6	-1.71784	-1.30803	-1.58164
183.7	-1.40236	-1.96257	-2.22195		183.7	-2.1372	-1.57042	-1.56382		183.7	-1.82098	-1.44528	-1.39834
183.8	-1.29397	-1.97112	-1.88419		183.8	-2.17846	-1.86949	-1.71652		183.8	-1.91206	-1.28962	-1.35058
183.9	-1.37268	-2.17043	-2.00462		183.9	-1.97032	-1.63854	-1.88834		183.9	-1.96382	-1.21089	-1.60411
184	-1.64129	-2.15845	-2.06945		184	-1.82025	-1.72682	-1.67488		184	-1.81971	-1.17718	-1.58157
184.1	-1.9207	-2.2045	-1.78405		184.1	-1.80548	-1.87059	-1.58355		184.1	-1.94699	-1.36585	-1.73644
184.2	-1.88493	-2.23539	-1.74123		184.2	-1.7953	-1.95431	-1.47096		184.2	-1.7576	-1.47247	-1.28173
184.3	-2.00056	-2.19085	-1.85446		184.3	-1.62946	-1.92449	-1.28047		184.3	-1.75075	-1.37104	-1.67494
184.4	-1.88839	-2.16045	-1.68985		184.4	-1.55479	-1.90142	-1.453		184.4	-1.57369	-1.52305	-1.67618
184.5	-2.0914	-2.1942	-1.73169		184.5	-1.82957	-1.67979	-1.68315		184.5	-1.31104	-1.58395	-1.62898
184.6	-2.23093	-1.91254	-1.60899		184.6	-1.81437	-1.67832	-1.69406		184.6	-1.23084	-1.58822	-1.45254
184.7	-2.16934	-1.73056	-1.67865		184.7	-1.82443	-1.53916	-2.10963		184.7	-1.5631	-1.47338	-1.47826
184.8	-1.78884	-1.70264	-1.51375		184.8	-1.70102	-1.41543	-1.91531		184.8	-1.78622	-1.4261	-1.72055
184.9	-1.68645	-1.56844	-1.58455		184.9	-1.5063	-1.41585	-1.90964		184.9	-1.83937	-1.35854	-1.77006
185	-1.77563	-1.80302	-1.66835		185	-1.29568	-1.46274	-1.83963		185	-1.76096	-1.32024	-2.00446
185.1	-1.79517	-1.90292	-1.75391		185.1	-1.01602	-1.40955	-1.71774		185.1	-1.46169	-1.16767	-1.99183
185.2	-1.632	-2.00176	-1.74611		185.2	-1.19343	-1.3866	-1.80605		185.2	-1.54701	-1.23162	-1.73604
185.3	-1.71319	-2.03924	-1.94359		185.3	-1.32409	-1.49067	-1.57519		185.3	-1.58326	-1.3589	-1.75068
185.4	-1.98731	-1.83411	-2.14976		185.4	-1.62051	-1.56828	-1.56623		185.4	-1.62591	-1.56986	-1.79248
185.5	-1.961	-1.85336	-2.23681		185.5	-1.85527	-1.70381	-1.48287		185.5	-1.6687	-1.48913	-1.58812
185.6	-1.84172	-2.09002	-2.22943		185.6	-1.97852	-1.47607	-1.65182		185.6	-1.85067	-1.29415	-1.52071
185.7	-1.87122	-1.99288	-2.2445		185.7	-2.03226	-1.48033	-1.61298		185.7	-1.8583	-1.31981	-1.40299
185.8	-2.17642	-2.34244	-2.3663		185.8	-2.08874	-1.32067	-1.53221		185.8	-1.68255	-1.25492	-1.30487
185.9	-2.3401	-2.19564	-2.25266		185.9	-2.16483	-1.38824	-1.64563		185.9	-1.44653	-1.31913	-1.51847
186	-2.05716	-2.17617	-2.15188		186	-2.0366	-1.58441	-1.6286		186	-1.57668	-1.69627	-1.54401
186.1	-1.98018	-1.80883	-2.31866		186.1	-1.74957	-1.49382	-1.51568		186.1	-1.52432	-1.61292	-1.70285
186.2	-1.92811	-1.77094	-2.18232		186.2	-1.61355	-1.36168	-1.61769		186.2	-1.6037	-1.73063	-1.75183
186.3	-1.88866	-1.72376	-2.2587		186.3	-1.65735	-1.25466	-1.6379		186.3	-1.5283	-1.70091	-1.49574
186.4	-1.89575	-1.76807	-2.19318		186.4	-1.74652	-1.36064	-1.43269		186.4	-1.68248	-1.464	-1.30068
186.5	-2.08944	-1.75544	-2.03024		186.5	-1.80912	-1.45501	-1.52063		186.5	-1.34604	-1.10532	-1.53798
186.6	-2.1574	-1.69361	-1.80511		186.6	-1.95429	-1.47149	-1.74889		186.6	-1.31336	-1.16887	-1.55563
186.7	-2.24559	-1.98673	-1.49482		186.7	-1.82675	-1.52054	-1.71791		186.7	-1.46295	-1.41652	-1.85801
186.8	-1.92613	-2.08784	-1.60306		186.8	-1.73421	-1.38659	-1.70611		186.8	-1.45271	-1.53644	-1.75785
186.9	-1.85958	-2.19636	-1.66595		186.9	-1.70968	-1.45108	-1.63219		186.9	-1.26594	-1.27044	-1.68414
187	-1.68813	-2.22107	-1.83915		187	-1.64388	-1.24054	-1.77969		187	-1.32294	-1.24884	-1.59558
187.1	-1.76644	-2.12881	-1.9322		187.1	-1.58855	-1.43248	-1.64247		187.1	-1.45327	-1.11634	-1.7125
187.2	-1.94243	-2.12613	-1.88985		187.2	-1.3852	-1.64573	-1.7453		187.2	-1.40188	-1.5138	-1.74753
187.3	-2.16847	-2.17951	-1.97306		187.3	-1.32886	-1.72839	-1.74985		187.3	-1.26357	-1.56132	-1.71236
187.4	-2.11747	-2.19902	-1.98601		187.4	-1.31735	-1.76391	-1.75787		187.4	-1.16149	-1.52682	-1.85929
187.5	-2.22563	-2.19399	-2.11222		187.5	-1.51601	-1.70666	-1.59456		187.5	-1.45399	-1.69646	-1.74375
187.6	-2.17455	-2.00471	-1.90373		187.6	-1.44081	-1.7226	-1.67408		187.6	-1.4868	-1.46176	-1.8216
187.7	-2.00234	-1.88609	-1.97188		187.7	-1.49988	-1.79169	-1.82585		187.7	-1.79419	-1.45254	-1.57539
187.8	-1.94621	-1.77299	-1.91975		187.8	-1.35587	-1.85149	-1.69757		187.8	-1.98432	-1.53748	-1.44264
187.9	-2.1007	-1.93621	-1.82247		187.9	-1.30751	-1.85999	-1.7179		187.9	-1.78156	-1.60343	-1.32213
188	-2.20738	-2.04286	-1.79947		188	-1.41316	-2.00442	-1.84786		188	-1.78184	-1.87688	-1.18696
188.1	-2.30067	-2.06051	-1.66041		188.1	-1.63673	-1.83428	-1.7102		188.1	-1.49915	-1.88352	-1.28287
188.2	-2.30368	-2.19367	-1.77181		188.2	-1.927	-1.88886	-1.52099		188.2	-1.57154	-1.53562	-1.2841
188.3	-2.23773	-2.32376	-1.86714		188.3	-2.02233	-1.82444	-1.72149		188.3	-1.56638	-1.38653	-1.17891
188.4	-2.03755	-2.34172	-1.82897		188.4	-2.32419	-1.63618	-1.68943		188.4	-1.22123	-1.16344	-1.36686
188.5	-2.20854	-2.30329	-1.90683		188.5	-2.15462	-1.61067	-1.8741		188.5	-1.10098	-1.15807	-1.43796
188.6	-2.40521	-2.19328	-2.19849		188.6	-2.06713	-1.56682	-2.0381		188.6	-0.959296	-1.06968	-1.28069
188.7	-2.14366	-2.07968	-2.16157		188.7	-1.79812	-1.60135	-1.90348		188.7	-1.07896	-1.09534	-1.18379
188.8	-2.26118	-1.77323	-2.09627		188.8	-1.63784	-1.46094	-2.0997		188.8	-1.32482	-1.03998	-1.14303
188.9	-2.07451	-1.82701	-1.96712		188.9	-1.38517	-1.40999	-2.10813		188.9	-1.31072	-0.955542	-1.50349
189	-2.31583	-1.77573	-1.93879		189	-1.41029	-1.63545	-2.14479		189	-1.43212	-1.30649	-1.87097
189.1	-2.23946	-1.72933	-1.85438		189.1	-1.4347	-1.50864	-2.30982		189.1	-1.4226	-1.32628	-1.83899
189.2	-2.23305	-2.00105	-2.09247		189.2	-1.00078	-1.71474	-2.28668		189.2	-1.43633	-1.28952	-1.71375
189.3	-2.35094	-2.07124	-1.61186		189.3	-1.10509	-1.57615	-2.25212		189.3	-1.53156	-1.67218	-1.41125
189.4	-2.17405	-2.04014	-1.51765		189.4	-1.40384	-1.62735	-2.32587		189.4	-1.78777	-1.89162	-1.62383
189.5	-2.01994	-2.07234	-1.59975		189.5	-1.54402	-1.74296	-2.13956		189.5	-1.91415	-1.74891	-1.32089
189.6	-2.04824	-2.03919	-1.59599		189.6	-1.56921	-1.58016	-2.04193		189.6	-1.47	-1.58816	-1.04727
189.7	-1.83664	-2.2969	-1.69017		189.7	-1.47802	-1.68788	-1.80381		189.7	-1.35605	-1.51277	-1.59212
189.8	-2.08269	-2.37645	-1.85321		189.8	-1.53261	-1.75751	-1.75548		189.8	-1.42456	-1.53368	-1.70707
189.9	-2.21321	-2.24431	-1.9893		189.9	-1.47974	-1.79813	-1.79425		189.9	-1.75122	-1.6568	-1.81728
190	-2.14982	-2.29287	-1.98318		190	-1.49801	-1.67147	-1.74392		190	-1.83149	-1.41313	-1.69288
190.1	-1.78669	-2.22692	-2.00984		190.1	-1.71283	-1.72689	-1.36853		190.1	-1.68837	-1.47265	-1.51268
190.2	-1.73828	-2.18341	-2.13603		190.2	-1.51905	-1.59779	-1.20319		190.2	-1.73139	-1.79515	-1.53416
190.3	-1.57083	-2.26662	-2.01731		190.3	-1.44596	-1.57618	-1.32166		190.3	-1.65498	-2.07661	-1.41418
190.4	-1.71058	-2.22928	-2.01966		190.4	-1.58423	-1.616	-1.54092		190.4	-1.77298	-1.73875	-1.78124
190.5	-1.65669	-2.19526	-1.82885		190.5	-1.54626	-1.46057	-1.50737		190.5	-1.54651	-1.71638	-2.06964
190.6	-1.79543	-2.28018	-2.09626		190.6	-1.76376	-1.48879	-1.24365		190.6	-1.23646	-1.3559	-2.05115
190.7	-1.99764	-2.37027	-1.96042		190.7	-1.89075	-1.5479	-1.30044		190.7	-1.61329	-1.17162	-1.99337
190.8	-1.80823	-2.45593	-2.24836		190.8	-1.80535	-1.42638	-1.3495		190.8	-1.66803	-1.36786	-2.12975
190.9	-1.70392	-2.37528	-2.2464		190.9	-1.56862	-1.27904	-1.3702		190.9	-1.59074	-1.21013	-2.09244
191	-2.05575	-2.09658	-2.10927		191	-1.39527	-1.38746	-1.61609		191	-1.79421	-1.15295	-1.93561
191.1	-2.06083	-2.12738	-1.82292		191.1	-1.46834	-1.39723	-1.76993		191.1	-1.61785	-1.29545	-1.99253
191.2	-2.24524	-1.89416	-1.92336		191.2	-1.83192	-1.30729	-1.70974		191.2	-1.72806	-1.36119	-1.68231
191.3	-2.21928	-1.87351	-1.71916		191.3	-1.75601	-1.56616	-1.84884		191.3	-1.78721	-1.34764	-1.53729
191.4	-2.18873	-1.87493	-1.90144		191.4	-1.91003	-1.39664	-1.85651		191.4	-1.72431	-1.38211	-1.77526
191.5	-2.0758	-1.99412	-1.67065		191.5	-1.94712	-1.35369	-2.18713		191.5	-1.59668	-1.52884	-1.72633
191.6	-2.15731	-1.85497	-1.74019		191.6	-1.63797	-1.44983	-2.15323		191.6	-1.5313	-1.58561	-1.78959
191.7	-2.00076	-1.70943	-1.61341		191.7	-1.7971	-1.67757	-1.88167		191.7	-1.5138	-1.64771	-1.82482
191.8	-2.07955	-1.73744	-1.85963		191.8	-1.78484	-1.7142	-1.60569		191.8	-1.54653	-1.50181	-1.6696
191.9	-2.33072	-1.78235	-2.0783		191.9	-1.59944	-1.84398	-1.4536		191.9	-1.39822	-1.42534	-1.5943
192	-2.40615	-2.01377	-2.21111		192	-1.4701	-1.79369	-1.31059		192	-1.32084	-1.41448	-1.61933
192.1	-2.39613	-1.79234	-2.25773		192.1	-1.34856	-1.79582	-1.20739		192.1	-0.999701	-1.34041	-1.41264
192.2	-2.28855	-1.99916	-2.0979		192.2	-1.47409	-1.64208	-1.35371		192.2	-1.06659	-1.29376	-1.42736
192.3	-2.45527	-1.95245	-2.02934		192.3	-1.40797	-1.73775	-1.57648		192.3	-1.15296	-1.47987	-1.45243
192.4	-2.40609	-1.9129	-1.86717		192.4	-1.23706	-1.63016	-1.90342		192.4	-1.34598	-1.48195	-1.49138
192.5	-2.17429	-1.97431	-1.7428		192.5	-1.2111	-1.55513	-1.71441		192.5	-1.46279	-1.39212	-1.57686
192.6	-2.07981	-2.26792	-1.76861		192.6	-1.32985	-1.79181	-1.54459		192.6	-1.33617	-1.35852	-1.60254
192.7	-2.01555	-2.09368	-1.91451		192.7	-1.45282	-1.80226	-1.50671		192.7	-1.48851	-1.23358	-1.75844
192.8	-1.72584	-2.19303	-1.8592		192.8	-1.6975	-1.53331	-1.4263		192.8	-1.38622	-1.38375	-1.8438
192.9	-1.73017	-2.03205	-1.98273		192.9	-1.67294	-1.60564	-1.79099		192.9	-1.27521	-1.72393	-1.75033
193	-1.87156	-1.91884	-2.1257		193	-1.79278	-1.63213	-1.56931		193	-1.38539	-1.4788	-1.95049
193.1	-1.7733	-1.81932	-1.81775		193.1	-1.93849	-1.72682	-1.72337		193.1	-1.29943	-1.35501	-1.69688
193.2	-1.76631	-1.85152	-1.81914		193.2	-1.7211	-1.71849	-1.53457		193.2	-1.2676	-1.42471	-1.58469
193.3	-1.74872	-1.83835	-1.96441		193.3	-1.71303	-1.7397	-1.37351		193.3	-1.64867	-1.5348	-1.58329
193.4	-1.83055	-1.73003	-1.85863		193.4	-1.78512	-1.60069	-1.29772		193.4	-1.71615	-1.7514	-1.60522
193.5	-1.84517	-1.59582	-2.05405		193.5	-1.6006	-1.4034	-1.62602		193.5	-1.57032	-2.12218	-1.7596
193.6	-2.00971	-1.67735	-2.10327		193.6	-1.6761	-1.33327	-1.44984		193.6	-1.61238	-2.06742	-1.6198
193.7	-1.99452	-1.93222	-2.03334		193.7	-1.78274	-1.42334	-1.40951		193.7	-1.5678	-1.9064	-1.50316
193.8	-2.03826	-2.1798	-1.85828		193.8	-1.8527	-1.47837	-1.48179		193.8	-1.58179	-1.85273	-1.33914
193.9	-1.82492	-2.12145	-1.78565		193.9	-1.84277	-1.37236	-1.53725		193.9	-1.57827	-1.70006	-1.09027
194	-1.97821	-2.0125	-1.81267		194	-1.6721	-1.5081	-1.74188		194	-1.66959	-1.51752	-1.22256
194.1	-2.02504	-1.97755	-2.02543		194.1	-1.6642	-1.55653	-1.65882		194.1	-1.75312	-1.38692	-1.14108
194.2	-1.99546	-1.78487	-2.0479		194.2	-1.55614	-1.6853	-1.69988		194.2	-1.54351	-1.30826	-1.3607
194.3	-1.99021	-1.78893	-2.01784		194.3	-1.78164	-1.59487	-1.64559		194.3	-1.50499	-1.30967	-1.27765
194.4	-1.86438	-1.91455	-1.78137		194.4	-1.74094	-1.53161	-1.64537		194.4	-1.41645	-1.32061	-1.37832
194.5	-1.87066	-1.78061	-1.674		194.5	-1.80834	-1.21306	-1.69944		194.5	-1.40857	-1.43813	-1.45528
194.6	-1.99392	-1.80287	-1.93233		194.6	-1.80615	-1.34302	-1.59145		194.6	-1.50714	-1.47647	-1.49995
194.7	-1.69653	-1.89016	-2.1623		194.7	-1.90102	-1.10863	-1.64508		194.7	-1.51258	-1.29192	-1.62577
194.8	-1.9942	-1.98413	-2.17117		194.8	-1.69757	-1.28246	-1.40033		194.8	-1.70481	-1.10471	-1.54225
194.9	-1.79111	-2.03799	-2.19002		194.9	-1.56474	-1.25984	-1.81011		194.9	-1.71087	-1.17418	-1.49616
195	-1.58628	-2.03375	-2.05848		195	-1.71092	-1.38394	-1.91652		195	-1.70058	-1.30752	-1.17688
195.1	-1.41695	-2.21646	-1.92288		195.1	-1.67449	-1.59262	-1.7494		195.1	-1.98234	-1.33145	-1.28523
195.2	-1.34023	-2.0466	-1.90701		195.2	-1.69765	-1.5625	-1.76056		195.2	-1.72191	-1.5003	-1.2349
195.3	-1.6373	-1.91321	-1.89329		195.3	-1.55748	-1.78261	-1.78554		195.3	-1.39877	-1.53635	-1.2701
195.4	-1.80398	-2.01381	-1.69047		195.4	-1.43708	-1.83434	-1.81102		195.4	-1.10881	-1.31775	-1.27781
195.5	-1.84083	-1.72837	-1.57876		195.5	-1.27893	-1.59808	-1.77004		195.5	-1.31144	-1.52054	-1.14399
195.6	-1.89727	-1.71571	-1.3221		195.6	-1.1927	-1.92921	-1.85517		195.6	-1.45917	-1.49502	-1.48949
195.7	-2.0794	-1.77304	-1.34146		195.7	-1.49956	-1.81423	-2.07654		195.7	-1.38037	-1.82121	-1.60547
195.8	-1.99764	-1.87077	-1.44304		195.8	-1.66399	-1.97277	-2.14723		195.8	-1.44131	-1.79314	-1.62986
195.9	-1.99292	-2.0402	-1.60926		195.9	-1.62004	-1.86775	-2.00847		195.9	-1.51078	-1.80773	-1.50387
196	-1.80333	-2.09058	-1.73077		196	-1.5372	-1.49646	-1.84275		196	-1.30618	-1.53847	-1.49539
196.1	-1.7658	-1.96351	-1.8632		196.1	-1.21633	-1.679	-1.5415		196.1	-1.24259	-1.3891	-1.45643
196.2	-1.68624	-2.05807	-1.81555		196.2	-1.29589	-1.52134	-1.35464		196.2	-1.18749	-1.41691	-1.44615
196.3	-1.95351	-1.79693	-1.68055		196.3	-1.49991	-1.44679	-1.34653		196.3	-1.24273	-1.3496	-1.4552
196.4	-1.85943	-1.83664	-1.66625		196.4	-1.63902	-1.49228	-1.69948		196.4	-1.31083	-1.39668	-1.4353
196.5	-1.81528	-1.79583	-1.87587		196.5	-1.79378	-1.6395	-1.80478		196.5	-1.47178	-1.54495	-1.26481
196.6	-1.99926	-1.76704	-1.93038		196.6	-1.84275	-1.37354	-1.71514		196.6	-1.46252	-1.6436	-1.07836
196.7	-2.2628	-1.84323	-1.83892		196.7	-1.95408	-1.37456	-1.80308		196.7	-1.66814	-1.60317	-1.28309
196.8	-2.22439	-1.91665	-1.95567		196.8	-1.7729	-1.30917	-1.77976		196.8	-1.87092	-1.73615	-1.1146
196.9	-2.17514	-1.87672	-1.66471		196.9	-1.76282	-1.42707	-1.96931		196.9	-1.81484	-1.95621	-1.54205
197	-2.03109	-1.5967	-1.75881		197	-1.67012	-1.58385	-1.82002		197	-1.82849	-2.0952	-1.67473
197.1	-1.91455	-1.63064	-2.05423		197.1	-1.84705	-1.5653	-1.7693		197.1	-1.61316	-2.11912	-1.66068
197.2	-1.79838	-1.50296	-1.99303		197.2	-1.80139	-1.45323	-1.61194		197.2	-1.6483	-1.97721	-1.6813
197.3	-1.80784	-1.5686	-2.07494		197.3	-1.74533	-1.39448	-1.62843		197.3	-1.72896	-1.88719	-1.83333
197.4	-1.66075	-1.71376	-2.16096		197.4	-1.43703	-1.33719	-1.69679		197.4	-1.24738	-1.77822	-1.82526
197.5	-1.63846	-1.91376	-2.26515		197.5	-1.27228	-1.67162	-1.81746		197.5	-1.28289	-1.69115	-1.92368
197.6	-1.60902	-1.7925	-2.13131		197.6	-1.20813	-1.53747	-1.74133		197.6	-1.29622	-1.53923	-1.79546
197.7	-1.63707	-1.94451	-1.97859		197.7	-1.50198	-1.68775	-1.80333		197.7	-1.34464	-1.44122	-1.69435
197.8	-1.61585	-1.90164	-2.04841		197.8	-1.57926	-1.68454	-1.72535		197.8	-1.30029	-1.51035	-1.64626
197.9	-1.88404	-1.64811	-2.05268		197.9	-1.86409	-1.71981	-1.59331		197.9	-1.37134	-1.63262	-1.31186
198	-2.15802	-1.80736	-1.76399		198	-1.82081	-1.46562	-1.50228		198	-1.29687	-1.71444	-1.51722
198.1	-2.11848	-1.90079	-1.74632		198.1	-2.02055	-1.63675	-1.59321		198.1	-1.5447	-1.6247	-1.50984
198.2	-1.91232	-2.01712	-1.76949		198.2	-1.91811	-1.69919	-1.93044		198.2	-1.57426	-1.39615	-1.54054
198.3	-1.99984	-2.00275	-1.64064		198.3	-2.00692	-1.88061	-1.52915		198.3	-1.56056	-1.4296	-1.49355
198.4	-2.09	-2.18997	-1.78113		198.4	-2.12644	-1.78412	-1.76129		198.4	-1.91782	-1.33597	-1.69797
198.5	-2.00281	-2.26635	-1.88915		198.5	-2.18805	-1.70467	-1.72613		198.5	-1.43197	-1.15126	-1.83209
198.6	-1.88384	-2.20763	-1.80725		198.6	-1.95235	-1.58726	-1.75786		198.6	-1.28783	-1.34447	-1.71382
198.7	-1.79943	-2.1867	-1.82377		198.7	-2.10002	-1.58003	-1.69549		198.7	-1.08115	-1.11731	-1.58524
198.8	-1.98312	-2.13042	-1.98055		198.8	-1.95051	-1.40311	-1.63079		198.8	-1.25649	-1.30252	-1.69321
198.9	-1.89958	-2.10908	-2.22336		198.9	-1.93205	-1.40714	-1.84028		198.9	-1.77174	-1.38231	-1.45996
199	-2.23543	-2.14912	-2.31726		199	-1.78906	-1.60122	-1.95364		199	-1.82827	-1.45715	-1.48999
199.1	-2.33453	-1.91383	-2.30013		199.1	-1.68916	-1.48386	-1.94596		199.1	-1.81068	-1.60533	-1.43352
199.2	-2.20976	-1.84716	-2.10491		199.2	-1.81705	-1.62945	-1.92992		199.2	-1.56686	-1.85378	-1.61662
199.3	-1.90167	-2.02243	-1.88575		199.3	-1.85014	-1.67425	-1.84258		199.3	-1.61028	-1.72475	-1.70866
199.4	-1.92639	-2.08763	-2.04212		199.4	-1.68593	-1.73387	-1.77991		199.4	-1.69374	-1.77971	-1.75235
199.5	-1.99289	-1.80291	-1.91037		199.5	-1.52009	-1.80472	-1.63964		199.5	-1.83803	-1.74127	-1.88043
199.6	-1.97189	-1.92679	-2.22115		199.6	-1.73215	-1.65052	-1.75272		199.6	-1.83501	-1.70649	-1.7557
[truncated: 51 more rows]

## Sheet: Fig.4f
Figure 4, Panel F, Top (ISR Sensitive)										Figure 4, Panel F, Bottom (ISR+ML218 Sensitive)
Time (ms)	Current (pA)									Time (ms)	Current (pA)
	-65 mV	-55 mV	-45 mV	-35mV	-25 mV	-15 mV	-5 mV	5 mV			-65 mV	-55 mV	-45 mV	-35mV	-25 mV	-15 mV	-5 mV	5 mV
0	0.0625	1.03125	0.546875	0.546875	-1.76562	1.20312	0.609375	0.796875		0	0.40625	-0.078125	-2.04688	1.28125	0.140625	1.28125	-0.859375	0.765625
0.1	-1.125	0.234375	-1.01562	-0.3125	2.60938	1.23438	1.65625	1.29688		0.1	1.78125	0.75	1.70312	-0.15625	-0.046875	-0.765625	0.421875	0.515625
0.2	-0.046875	-1.51562	-2.10938	2.79688	0.171875	-3.79688	-2.89062	3.82812		0.2	-1.40625	0.125	0.15625	-3.35938	-1.73438	2.32812	2.29688	-2.60938
0.3	-1.09375	-3.28125	-1.54688	-1.65625	0.21875	2.5625	2.17188	-0.6875		0.3	0.96875	2.53125	1.96875	0.53125	1.09375	-2.32812	-2.32812	1.42188
0.4	-0.5	1.42188	2	-1.15625	2.125	2.28125	-2.79688	-2.28125		0.4	1.09375	-1.04688	1.53125	-0.046875	-2.14062	0.40625	1.875	1.48438
0.5	-0.109375	1.35938	3.35938	0.953125	0.046875	0.328125	0.625	0.28125		0.5	2.4375	0.34375	-0.921875	-0.03125	2.04688	-2.125	-0.328125	0.296875
0.6	-2.15625	0.6875	-2.6875	-3.20312	3.67188	-0.515625	-2.03125	1.48438		0.6	2.03125	1.57812	-0.109375	2.90625	-1.76562	3.10938	3.3125	-2.60938
0.7	0.53125	-0.890625	-0.8125	2.125	0.859375	-0.625	-1.71875	0.3125		0.7	-1.42188	-1.39062	1.71875	-0.171875	-0.953125	-2.23438	0.328125	0.015625
0.8	1.03125	0.296875	-1.20312	-1.42188	-1.48438	-0.171875	1.625	-1.95312		0.8	1.82812	1.70312	0.21875	-1.6875	1.875	-0.3125	1.53125	2.60938
0.9	-2.57812	-2.20312	-0.734375	0.28125	2.35938	1.70312	1.35938	-0.171875		0.9	2.46875	1.23438	0.5	0.75	-1.34375	1.14062	-2.95312	-0.859375
1	-0.671875	0.71875	1.95312	1.17188	3.09375	1.59375	1.59375	-0.109375		1	1.1875	-1.8125	-1.48438	-3.0625	-1.92188	-1.25	-0.078125	0.9375
1.1	1.84375	-0.328125	0.15625	-2.875	-1.89062	-0.96875	-1.26562	0.140625		1.1	-4.39062	-1.23438	1.375	0.609375	2.70312	2.42188	1.71875	-1.53125
1.2	1.4375	-2.98438	-0.125	0.734375	-1.04688	-0.8125	0.5	1.625		1.2	0.5625	-0.3125	-0.84375	0.21875	0.734375	0.90625	-1.23438	-2.46875
1.3	-0.00896339	0.298455	0.664395	-0.614044	0.2422	0.194796	0.109213	0.288795		1.3	0.00467273	-0.280763	-0.153415	0.0763123	0.0915025	0.0345556	0.298166	-0.237961
1.4	-0.0079197	0.467125	0.685278	-0.653225	0.0877841	-0.13723	-0.282269	0.372438		1.4	0.0667539	-0.0915075	-0.294234	0.369707	0.262782	0.381323	0.766147	-0.0518731
1.5	-0.0267317	0.170859	0.618695	-0.615525	0.315396	-0.107353	-0.685508	0.247399		1.5	0.347805	0.0654757	-0.0526087	0.509879	0.231079	0.479535	0.760323	0.0315587
1.6	-0.131384	0.49109	0.879018	-0.211422	0.567874	-0.131534	-0.643341	0.217798		1.6	0.403697	-0.125567	-0.241322	-0.0666475	-0.114021	0.581932	0.618517	0.145564
1.7	-0.207979	0.251349	0.719093	-0.161454	0.75552	0.00889107	-0.626064	0.140201		1.7	0.579671	0.135904	0.0855934	0.130013	-0.373524	0.525393	0.799144	-0.056344
1.8	-0.0894467	0.120535	0.696052	-0.349813	0.194592	-0.198797	-0.202792	0.28866		1.8	0.426475	0.199039	0.444544	0.807295	-0.127013	0.558351	0.769722	-0.254988
1.9	-0.477649	0.343711	0.623231	-0.295456	0.396408	-0.280899	0.0598136	-0.0637392		1.9	0.49603	0.167371	0.621637	0.885799	-0.248118	0.494101	0.327303	-0.125368
2	-0.442133	-0.0290299	0.421488	-0.47083	0.462329	-0.146773	0.239878	0.034877		2	0.354724	0.420299	0.686501	0.74734	-0.133617	0.458581	0.0528479	-0.101702
2.1	-0.463471	-0.0721201	0.119119	-0.295091	0.391028	-0.272342	0.241411	0.00575816		2.1	0.481645	0.37157	0.66548	0.322906	0.157882	0.536	-0.0979171	-0.135695
2.2	-0.703443	-0.253804	0.0815685	-0.240294	0.465095	-0.34345	0.248651	-0.132535		2.2	0.666718	0.476802	0.696855	-0.0490447	0.141294	0.317312	-0.0721719	0.171397
2.3	-0.700744	-0.25344	0.100821	-0.354463	1.00878	-0.292546	0.0235606	-0.193585		2.3	0.943211	0.469287	0.483774	0.384038	-0.558492	0.112998	-0.0662475	0.453184
2.4	-0.704929	0.035288	0.132608	-0.450168	1.01207	-0.201073	0.156043	-0.0968776		2.4	0.765633	0.327185	-0.10159	0.312531	-0.747624	0.0990821	-0.0844692	0.0573513
2.5	-0.491317	0.138605	0.00245649	-0.36166	0.413023	-0.0899926	0.0731725	-0.113489		2.5	0.689091	-0.175192	-0.104358	0.432773	-0.648139	0.104842	0.209024	0.184967
2.6	-0.561793	0.13225	-0.0782078	-0.455239	0.53792	-0.00256254	0.346451	-0.234178		2.6	1.09143	-0.313149	0.0307936	0.26825	-0.819638	-0.250435	-0.0515217	0.250055
2.7	-0.226037	0.482432	-0.0601102	-0.510605	0.331908	0.21186	0.460778	-0.188073		2.7	0.807724	-0.56263	0.144365	0.0744249	-0.727604	-0.458418	-0.350736	0.325094
2.8	-0.0590015	0.148571	0.0688647	-0.153949	0.526803	0.0482964	0.232751	-0.0573574		2.8	0.593774	0.0849609	0.143341	-0.126674	-0.718956	-0.202133	-0.195154	0.313248
2.9	0.0989717	-0.205821	0.140735	-0.279282	0.636626	0.109679	0.282299	0.259156		2.9	0.551023	0.590766	-0.111829	-0.113929	-0.946759	-0.303646	-0.0613683	0.082656
3	-0.507512	-0.454015	-0.304575	-0.188576	0.501237	-0.045039	0.0406882	0.16034		3	0.713548	0.463	0.218051	-0.250044	-0.66149	-0.128872	0.133558	0.397609
3.1	-0.492333	-0.202576	-0.331509	-0.0870272	0.460842	0.390256	-0.00123927	0.0673317		3.1	0.621427	0.267101	0.193932	-0.165517	-0.553183	-0.288499	0.502434	0.155105
3.2	-0.37816	-0.197541	-0.159555	-0.347751	0.136122	0.172855	-0.426555	0.195032		3.2	0.651522	0.176967	0.0918179	-0.00223414	-0.440065	-0.292527	0.65032	-0.150369
3.3	-0.163118	-0.293261	-0.54936	-0.159254	0.0715213	0.3503	-0.47072	0.0760662		3.3	0.598834	0.198353	0.330484	0.133177	-0.323126	-0.259096	0.498775	-0.206436
3.4	-0.132316	-0.276132	-0.394291	-0.455568	0.326903	0.385745	-0.187382	0.30828		3.4	0.437853	0.301371	0.570066	0.430129	-0.543983	-0.322214	0.544371	-0.276827
3.5	-0.0697975	-0.206947	-0.38472	-0.271948	0.336082	0.399158	-0.0546331	0.104521		3.5	0.190987	0.421469	0.285885	0.101272	-0.122836	-0.034189	0.5789	-0.36506
3.6	-0.527176	-0.0889941	-0.206538	-0.00326158	0.31009	0.548921	0.0793466	-0.0937422		3.6	0.450963	0.094437	0.112961	-0.170521	0.156856	-0.234215	0.380667	-0.105786
3.7	-0.705257	-0.243025	-0.309202	-0.0946918	0.309472	0.450568	-0.0343774	-0.20374		3.7	0.516587	0.49203	0.0227421	0.0688991	0.223957	-0.211793	0.295118	-0.181651
3.8	-0.505403	0.00664343	-0.208422	-0.429204	0.233942	0.381338	-0.416996	-0.347692		3.8	0.424984	0.306166	-0.0274045	0.38821	0.332852	-0.0363043	-0.000776511	-0.400966
3.9	-0.517867	-0.0307637	-0.0150707	-0.111563	0.305837	0.312679	-0.159263	-0.485657		3.9	0.206966	0.253688	-0.00692123	0.474243	0.0675018	0.051812	-0.173334	-0.0997814
4	-0.182849	-0.304772	-0.213463	0.15724	0.25148	0.197264	-0.0752848	-0.703074		4	0.0195356	0.345831	0.348228	0.316257	0.0333427	0.247431	-0.567239	0.567312
4.1	-0.163609	-0.536696	-0.389978	0.335222	0.0799116	0.194734	-0.00769506	-0.613331		4.1	-0.265258	0.55925	0.535601	0.0878381	0.0745946	0.26931	-0.659644	0.53736
4.2	-0.354597	-0.551897	0.105808	0.218618	0.10374	0.348941	0.199805	-0.493906		4.2	-0.102087	0.396505	0.129832	0.0312148	-0.343106	-0.170817	-0.629673	0.504418
4.3	-0.360094	-0.714862	0.2398	0.283479	0.574538	0.252245	-0.176162	-0.445593		4.3	0.239974	0.322799	-0.0296506	0.203219	-0.703019	-0.389922	-0.143347	0.592387
4.4	-0.219921	-0.456581	0.514621	0.266168	0.694137	0.231656	0.0594397	-0.278002		4.4	0.361778	0.393374	-0.154376	0.169958	-0.537342	-0.259302	-0.330857	0.381333
4.5	-0.184507	-0.420751	0.225312	0.338338	0.139199	0.26814	0.155717	-0.305508		4.5	0.174453	0.161876	0.0338756	0.0394364	0.0505965	-0.18152	-0.469747	0.466777
4.6	-0.531809	-0.219054	0.246085	0.0860692	-0.0500973	0.00847104	0.326995	-0.283202		4.6	0.267867	0.232196	-0.106479	-0.0447288	0.324839	0.00151616	-0.184132	0.587018
4.7	-0.552798	-0.604724	0.248296	-0.00180541	0.197159	-0.1157	0.372916	-0.308665		4.7	0.250187	0.312827	-0.14188	-0.07405	0.0356142	0.178498	-0.237356	0.605965
4.8	-0.532607	-0.377546	0.536406	0.00763088	-0.125777	-0.0323823	0.559989	-0.496613		4.8	0.27001	0.066683	-0.332564	-0.144416	-0.0190065	0.0503007	-0.326415	0.477536
4.9	-0.192266	-0.215408	0.449612	-0.0575745	-0.0353656	0.120932	0.329991	-0.504491		4.9	0.0878444	-0.268051	-0.168235	-0.39861	0.35722	0.0699717	-0.0193407	0.542697
5	-0.36773	0.0618946	0.236941	0.0139851	0.0322004	0.0685854	-0.0624096	-0.721877		5	0.134605	-0.514568	0.307987	-0.56641	0.332954	-0.0897768	-0.0962007	0.701043
5.1	-0.361565	-0.103477	-0.101783	0.168294	-0.186448	-0.305921	-0.273275	-0.489751		5.1	0.0212158	-0.255388	0.590369	-0.570362	0.509186	-0.136902	-0.0184939	0.629232
5.2	-0.289629	0.395059	-0.226046	0.107586	-0.168085	-0.0493457	-0.632634	-0.451423		5.2	-0.166448	-0.401896	0.690088	-0.509855	0.197774	0.000749442	0.175928	0.715064
5.3	-0.340679	0.30755	-0.206395	0.167336	-0.126381	-0.0681784	-0.81898	-0.251603		5.3	-0.276112	-0.289944	0.487412	-0.304679	-0.0567458	0.435028	0.404173	0.405612
5.4	-0.191691	0.333136	-0.418861	0.194392	-0.274833	-0.199169	-0.855072	0.155809		5.4	-0.0120146	-0.0482849	0.575728	-0.0029126	0.0554974	0.544278	0.312328	0.275667
5.5	-0.153765	0.252274	-0.107975	0.0356318	-0.361062	-0.0415428	-0.451383	-0.0649953		5.5	0.359086	0.042265	-0.0165496	0.0761377	0.225721	0.422947	0.0954785	0.301118
5.6	-0.0597275	0.258771	0.178296	-0.237789	-0.135117	-0.0253627	-0.282662	-0.18121		5.6	0.197307	0.135726	-0.545484	0.145926	-0.0283066	0.029693	-0.0502898	0.225381
5.7	-0.466457	0.708381	0.282429	-0.802436	0.157307	0.160996	-0.0865235	-0.157004		5.7	0.328632	-0.00448096	-0.787612	0.397788	-0.165286	-0.0465761	-0.0571277	0.47476
5.8	-0.693921	0.329118	0.439416	-0.371158	-0.0141233	0.35088	-0.24598	-0.0800405		5.8	0.623872	-0.062431	-0.682339	0.404693	0.0313815	-0.528411	0.332775	-0.0413095
5.9	-0.404065	0.323396	0.108897	-0.20804	0.20277	0.445003	0.0221453	-0.245172		5.9	0.34107	-0.281157	-0.0328341	0.087992	-0.150854	-0.782528	0.521885	0.106525
6	-0.253984	0.187065	-0.182557	-0.31663	0.234372	0.167634	0.34172	-0.111439		6	0.251133	-0.41629	0.167584	0.297931	-0.00668175	-0.329061	0.418329	-0.293198
6.1	-0.659779	0.163605	-0.16387	-0.197611	0.155761	0.202945	0.0481032	0.0728926		6.1	0.365127	-0.238433	0.248947	0.334419	0.180248	-0.29641	0.481363	-0.311278
6.2	-0.376413	-0.203024	-0.0714439	0.131182	0.578675	0.0553002	-0.0729802	-0.346373		6.2	0.319983	0.273517	0.110356	0.227797	-0.0233937	-0.213191	0.358032	-0.00991469
6.3	-0.513828	-0.225233	-0.0386124	-0.177617	0.372845	0.180526	-0.0153284	-0.475253		6.3	0.476804	0.305974	0.0682675	0.389746	-0.0644292	-0.0195601	0.174522	0.0188354
6.4	-0.427153	-0.353543	0.0846981	0.253811	-0.0128617	0.191039	-0.0118042	-0.423442		6.4	0.140751	0.460736	0.155538	0.48477	0.00285653	0.0565659	-0.0741085	0.179066
6.5	-0.184389	-0.366646	0.0423699	0.388964	0.4584	0.152499	-0.0505426	-0.393876		6.5	-0.00249971	0.443578	0.0696965	0.220415	-0.269203	-0.0468652	-0.069254	0.15693
6.6	-0.00940107	-0.165205	-0.280444	0.189269	0.285347	0.413862	-0.252016	-0.643034		6.6	0.0275951	0.128378	0.501122	0.436318	0.0372584	-0.0823703	0.0608175	0.172622
6.7	0.0869417	0.0310644	-0.3045	-0.042759	0.358109	0.482142	0.145008	-0.590038		6.7	0.246087	0.0725584	0.422926	0.429634	-0.0543533	-0.107398	-0.0238085	-0.00073055
6.8	0.238589	0.0885629	-0.0656957	0.122949	-0.0718732	0.326153	-0.148605	-0.566321		6.8	-0.110084	0.0120224	0.483876	0.165222	-0.0477031	0.242985	0.324872	0.00588172
6.9	0.160176	0.0384764	-0.180433	0.108302	0.112584	0.407008	-0.00997503	-0.345806		6.9	0.350599	-0.0760396	0.537373	0.304507	-0.13774	0.0413436	0.264955	0.123451
7	-0.265843	-0.1929	-0.016437	-0.610382	-0.08715	0.688551	0.110928	-0.399941		7	0.328758	0.163981	0.287618	0.938853	0.251866	-0.0581236	0.207259	0.0675035
7.1	-0.235043	-0.288757	-0.15285	-0.427546	-0.0394351	0.733323	-0.100983	-0.1728		7.1	0.535492	0.398993	0.404711	0.82378	0.133834	0.150094	0.313576	0.0357028
7.2	0.234244	-0.249724	-0.160883	-0.507324	-0.165985	0.558193	-0.0747581	-0.219073		7.2	0.206931	0.474185	0.256174	0.739178	0.0237978	0.314058	0.323614	0.136184
7.3	0.0157869	-0.0727892	-0.134424	-0.261987	0.0967806	0.811872	-0.503148	-0.49808		7.3	0.576368	0.419271	0.113222	0.313386	-0.0461998	-0.0674132	0.532096	0.198044
7.4	0.26915	0.0778468	-0.157421	-0.208726	-0.163755	0.260656	-0.335574	-0.665327		7.4	0.451733	0.189741	-0.00937349	-0.115417	0.0515782	0.157746	0.124339	0.0956118
7.5	0.352008	0.29898	-0.044526	0.0578345	-0.310748	0.264244	-0.227584	-0.861156		7.5	0.29716	-0.0345098	-0.118664	-0.0909189	0.274667	0.212871	0.112157	0.401799
7.6	-0.195008	0.337067	-0.327982	0.17835	-0.502053	0.0772984	-0.318348	-0.756758		7.6	0.581978	0.0419113	0.0186297	0.0643966	0.4235	0.224532	0.206434	0.290566
7.7	0.0222219	0.285251	-0.0665095	-0.193385	-0.333971	0.248354	-0.276196	-0.686167		7.7	0.0618362	0.140358	-0.141897	0.129243	0.385496	0.22279	0.184247	0.605864
7.8	0.0290071	0.211205	-0.338013	0.0744553	-0.322137	0.0102657	-0.353171	-0.192875		7.8	0.106279	0.23458	-0.0613536	-0.281588	0.583281	0.462642	0.259559	0.494951
7.9	-0.0115043	0.173945	-0.720255	0.204617	-0.181458	0.0901198	-0.164243	-0.154538		7.9	-0.0898378	0.539502	-0.108894	-0.403921	0.500271	0.307587	0.229855	0.34463
8	-0.04116	0.0935263	-0.577583	0.393077	-0.200271	0.323411	0.0126746	-0.307638		8	-0.112172	0.571694	0.0116974	-0.688847	0.0633239	0.254078	0.144718	0.470161
8.1	-0.296664	-0.0553386	-0.34195	0.340015	-0.256626	0.224634	-0.156019	0.00106398		8.1	-0.229012	0.392139	-0.0721246	-0.566883	0.231191	0.291451	-0.0414005	0.11817
8.2	-0.350773	-0.430473	-0.263789	0.0738454	-0.0547139	0.0783265	0.241328	-0.0992594		8.2	-0.193619	0.309484	-0.293387	-0.00220089	-0.0371661	0.224249	-0.436041	0.0812545
8.3	0.118956	-0.135994	-0.327527	-0.317052	0.131073	-0.0733028	-0.00804762	-0.0908604		8.3	-0.115991	0.398513	-0.180652	0.412523	-0.0629941	0.192348	-0.0261962	-0.136418
8.4	-0.385096	-0.47606	-0.201119	-0.361411	0.130384	-0.306235	0.0394687	0.23496		8.4	0.197533	0.667222	-0.21089	0.67852	-0.225562	0.228834	-0.016072	-0.226411
8.5	-0.6395	-0.506104	-0.214109	-0.429392	-0.0726648	-0.411169	-0.0634537	0.404866		8.5	-0.134157	0.227163	-0.145118	0.859409	0.0150529	-0.0522535	0.181412	-0.172881
8.6	-0.824087	-0.274554	-0.00645699	-0.526386	0.106098	-0.305351	-0.227309	0.595003		8.6	0.322722	0.15338	-0.000314565	1.02131	0.321364	-0.161552	0.402677	-0.0421857
8.7	-0.479988	-0.00913185	0.414317	-0.464867	0.336866	-0.0153736	0.125483	0.40651		8.7	0.142766	0.295209	-0.0302092	0.828373	0.0908287	-0.0236989	0.257632	0.549486
8.8	-0.269844	0.20466	0.511294	-0.615047	0.131515	0.0932296	0.00786683	0.23539		8.8	0.181912	0.0810802	0.362394	0.741184	0.0554661	0.0614935	0.281123	0.33067
8.9	-0.0950857	0.227123	0.515217	-0.475943	0.320114	0.401715	0.0631914	0.324938		8.9	0.0073739	0.363521	0.386348	0.441502	-0.152747	-0.0925332	0.113554	-0.176757
9	0.131059	0.304739	0.353523	-0.408793	0.253877	0.233399	-0.1023	-0.0215962		9	0.166698	0.267833	0.537534	0.501489	0.189602	-0.0278499	0.405765	-0.552394
9.1	-0.154645	0.251414	0.366284	-0.981117	-0.188742	0.235403	-0.387469	-0.221674		9.1	0.479093	0.28657	0.189907	0.646912	0.216007	-0.183399	0.244845	-0.251765
9.2	0.0182228	-0.00216657	0.148257	-0.561685	-0.0258746	0.514023	-0.0747423	-0.121859		9.2	0.089011	0.150864	0.332853	0.427761	0.204474	-0.485047	0.2348	-0.0551945
9.3	-0.0114256	0.155461	-0.148575	-0.279518	-0.0231117	0.598037	0.00949743	-0.0442137		9.3	0.077973	0.262389	0.0592347	0.22569	-0.131768	-0.408184	0.301369	0.0375159
9.4	0.0258721	0.0787191	-0.190407	-0.172257	-0.0495838	0.239257	0.153294	-0.0633622		9.4	0.0886384	0.14658	0.260892	-0.152085	-0.175591	0.0569453	0.393788	0.0450282
9.5	-0.050894	-0.00783688	-0.0361778	-0.279581	0.0871667	0.509621	-0.168553	-0.00321371		9.5	-0.0890074	0.160867	0.30942	-0.150574	-0.159182	-0.171631	0.449459	0.0801253
9.6	0.142618	0.292018	-0.0104641	-0.0807617	0.205582	0.205575	-0.481564	0.0264821		9.6	-0.153112	-0.199162	0.626238	-0.369541	0.0105537	-0.149196	0.510461	0.0239488
9.7	0.0519005	0.219382	0.0591354	0.0573021	0.186367	0.370527	-0.486902	-0.1387		9.7	-0.0400724	0.101288	0.541672	-0.665228	0.063834	-0.308312	0.293489	0.0570132
9.8	0.0633089	0.280979	-0.147112	-0.0635703	0.474322	0.367432	-0.531412	0.134359		9.8	-0.257497	-0.171738	0.452864	-0.727228	-0.0932113	-0.0284504	0.449541	-0.209419
9.9	-0.0693343	-0.0739564	-0.17691	-0.164331	0.495838	0.221388	-0.73003	0.431786		9.9	0.0553039	0.260401	0.701808	-0.567196	-0.173927	0.026959	0.410003	-0.617299
10	-0.0283081	-0.0680684	-0.0147229	-0.226096	0.424105	0.326485	-0.320232	0.419833		10	-0.0260634	0.236741	0.545422	-0.366147	-0.379844	0.0752087	0.0590423	-0.462927
10.1	-0.0792914	-0.375106	-0.348964	-0.569468	0.128081	0.662591	-0.0468895	0.163304		10.1	0.0833055	0.346463	0.255394	0.0479295	-0.259459	-0.411313	-0.272997	-0.190538
10.2	0.221967	-0.260323	-0.267494	-0.516913	0.254755	0.440152	0.134892	-0.149395		10.2	-0.0653343	0.460399	0.288184	0.262596	-0.128519	-0.11391	-0.111845	-0.083419
10.3	0.204778	-0.379622	-0.470387	-0.422319	-0.0113488	0.405827	0.0483858	-0.130978		10.3	-0.447644	0.375977	0.223154	0.274439	-0.186117	-0.160192	-0.0564326	-0.262349
10.4	0.205649	-0.0836053	-0.242144	-0.226823	0.0045962	0.140434	0.0797283	-0.520605		10.4	-0.230276	0.277509	-0.117483	0.415886	-0.187424	-0.0537417	-0.195095	-0.0334464
10.5	-0.40658	0.122206	-0.196641	-0.0831606	0.00590118	0.0989523	-0.158956	-0.259008		10.5	-0.0627589	0.248009	0.00666234	0.605853	-0.125737	-0.140481	0.223763	-0.103033
10.6	-0.694475	0.213979	-0.420844	-0.061667	0.136255	0.108363	-0.688527	-0.330138		10.6	0.488401	0.0915248	-0.0940835	0.356692	-0.151985	-0.229851	0.336523	-0.205834
10.7	-0.681643	0.0750447	-0.2433	0.273137	0.107881	0.113691	-0.908876	-0.0494854		10.7	0.593712	-0.0282796	0.0447776	0.148186	0.0107855	0.0186215	0.187395	-0.0456761
10.8	-0.610021	0.346792	-0.471384	0.0991836	0.495954	0.350379	-0.43887	0.0837305		10.8	0.271091	-0.193671	0.286848	0.0343397	0.0412071	0.236767	0.245781	-0.0256266
10.9	-0.497128	0.351915	-0.536635	0.25163	0.276859	0.313322	-0.266612	-0.0693166		10.9	0.0281295	-0.120821	0.0977659	0.100275	-0.0177339	0.349812	-0.115267	0.33854
11	-0.52151	-0.0430057	-0.450687	0.453165	-0.0762159	0.384041	-0.272088	0.0229532		11	0.276326	0.294446	0.0431982	-0.0199802	-0.040185	0.311912	0.192274	0.350272
11.1	-0.611672	0.0209376	-0.260196	0.160012	0.0653598	0.352466	-0.153554	0.0235626		11.1	0.668584	0.518689	0.0913343	0.152476	-0.176117	-0.0482144	0.264103	0.0446875
11.2	-0.982925	-0.105255	0.159848	0.192295	0.149122	0.192563	-0.36845	0.453313		11.2	0.358848	0.608807	0.173701	0.23085	-0.201946	-0.046476	0.621587	-0.191448
11.3	-0.701827	-0.150372	0.326163	0.0334679	-0.107403	0.0473515	-0.195931	0.162155		11.3	0.448367	0.47453	-0.359127	0.024428	-0.260195	-0.0114229	0.461927	0.0336905
11.4	-1.023	-0.188481	0.360923	0.00373237	0.238247	-0.0656457	-0.0858841	-0.1559		11.4	0.716709	0.247207	-0.350031	-0.170678	-0.181606	-0.0556953	0.461562	0.16145
11.5	-0.838125	-0.0753676	0.423579	0.00433759	0.0724388	0.0673699	0.519716	0.301881		11.5	0.575436	0.189424	-0.507384	-0.363077	-0.16335	0.211897	0.316316	-0.143638
11.6	-0.493517	-0.188414	0.502953	0.0298527	-0.375778	-0.0546669	0.67911	0.500571		11.6	0.638481	0.12381	-0.537306	-0.333399	0.431315	0.549589	-0.0335519	-0.605967
11.7	-0.462056	-0.0537329	0.740756	0.10421	-0.353386	0.147589	0.551871	0.370137		11.7	0.423139	0.0629431	-0.755563	-0.379052	0.215376	0.305804	0.173905	-0.629479
11.8	-0.639627	0.0867982	0.315419	0.16466	-0.393935	0.0584993	0.393223	0.34122		11.8	0.41282	0.0259016	-0.553971	-0.186687	0.258067	0.559737	-0.214856	-0.33903
11.9	-0.715911	0.282502	0.11348	0.146817	-0.392919	0.290556	0.171873	0.126492		11.9	0.330858	-0.195705	-0.110289	-0.0603164	0.272904	0.078992	-0.202674	-0.175482
12	-0.754143	0.187713	0.236001	0.142477	-0.741788	0.280428	-0.416478	0.457039		12	0.469231	-0.00650529	0.074766	-0.049452	0.528756	-0.0598554	0.588868	-0.478775
12.1	-0.512136	-0.0265209	0.0557621	-0.0712085	-0.444674	0.0119803	-0.671078	0.285465		12.1	0.626328	-0.00102967	0.286977	0.156344	0.430665	0.0565418	0.730375	-0.222479
12.2	-0.217753	-0.272625	-0.10442	-0.0452214	-0.404416	-0.0701313	-0.171206	0.479054		12.2	0.437267	0.0432975	0.680704	0.206406	0.931978	0.0923694	0.665045	-0.0851659
12.3	-0.478709	-0.215228	-0.151905	-0.174894	0.0932114	-0.047832	0.000444225	0.204284		12.3	0.692757	0.0546549	0.997704	0.158504	0.615381	0.0730479	0.144778	-0.165608
12.4	-0.338878	0.20925	-0.261111	-0.171674	0.236875	-0.214479	0.243681	-0.201766		12.4	0.444822	-0.268344	0.701556	-0.0963293	0.638068	0.0999534	-0.152749	0.0151781
12.5	-0.726219	0.322597	-0.0355212	-0.5385	0.138305	-0.0890481	0.105064	-0.420356		12.5	0.229938	-0.204217	0.441908	0.0143909	0.358409	-0.103484	0.0340143	-0.139821
12.6	-0.820978	0.170355	-0.413827	-0.624333	0.0384006	-0.308198	0.357535	-0.120223		12.6	0.0701333	-0.158017	0.414782	0.126142	0.298218	0.042055	-0.160112	-0.400339
12.7	-0.630931	0.198051	-0.454676	-0.406419	0.370929	0.046736	0.56607	0.0267599		12.7	0.104212	-0.272575	0.459266	0.136454	0.0125114	0.0424117	-0.465794	-0.393736
12.8	-0.495319	0.0988271	-0.785235	-0.581561	0.447322	0.178218	0.355228	0.207937		12.8	0.0732234	-0.301863	0.614378	0.057045	0.106465	0.0719919	-0.465515	-0.29715
12.9	-0.523425	-0.126336	-1.08449	-0.598195	0.294766	-0.0700635	0.0153208	0.247019		12.9	0.212522	-0.204338	0.930176	-0.00898903	0.121611	0.180683	-0.32911	-0.335191
13	-0.519074	0.254094	-0.358421	-0.777298	0.547227	0.217637	-0.0451457	-0.170572		13	0.628297	-0.441767	0.553712	0.0438147	0.0800635	0.0372321	-0.238197	-0.119859
13.1	-0.219018	0.269284	-0.79139	-0.610533	0.300039	0.0862481	0.268723	-0.153193		13.1	0.592984	-0.470501	0.765239	0.0298927	0.334003	-0.263309	0.0143242	-0.0292145
13.2	-0.34562	0.427037	-0.504784	-0.555159	0.641516	0.261655	0.285482	-0.116158		13.2	0.787359	-0.539894	0.479141	0.000465703	-0.107612	-0.0282344	-0.165619	-0.259849
13.3	-0.473848	-0.0707211	-0.688809	-0.578149	0.765926	0.697747	0.0675492	-0.200927		13.3	0.783172	-0.24072	1.04024	0.139209	-0.0968452	-0.490745	0.0401003	-0.193486
13.4	-0.282177	-0.38547	-0.494549	-0.375067	0.860289	0.513282	-0.197697	-0.0107011		13.4	0.814818	-0.120795	0.273329	0.13016	0.135567	-0.472115	0.350004	-0.0894779
13.5	-0.302779	-0.430056	-0.376595	-0.293205	0.65847	0.43329	0.129309	0.177369		13.5	0.675179	-0.13348	0.241446	0.360323	0.138814	-0.530718	0.0149818	-0.204467
13.6	-0.792447	-0.434134	-0.0906748	-0.236471	0.743946	0.496695	0.181672	0.0235454		13.6	0.834313	-0.288711	0.0389693	0.233468	-0.323154	-0.613237	0.0615494	0.107838
13.7	-0.68551	-0.432383	-0.094266	-0.275646	0.503986	0.472413	0.336408	-0.635434		13.7	0.825315	-0.115096	0.107462	-0.0189802	-0.281848	-0.539818	0.162737	0.331554
13.8	-1.07503	-0.0604746	-0.222866	-0.509813	0.365659	0.489201	0.398862	-0.672203		13.8	0.67246	-0.642085	0.221622	-0.0195484	-0.0521171	-0.580447	-0.0987986	0.596329
13.9	-0.537456	0.0273139	-0.119911	-0.113951	0.374135	0.595503	0.314482	-0.54525		13.9	0.491674	-0.595856	0.235264	-0.35715	-0.0591601	-0.698593	0.185101	0.430917
14	-0.360414	0.0669708	0.253917	0.022643	0.135766	0.354399	0.239975	-0.705122		14	0.340533	-0.208468	0.139165	-0.167767	-0.165499	-0.488204	0.151104	0.396204
14.1	-0.366005	0.404511	0.163933	-0.0115185	0.0547502	0.318464	-0.193807	-0.107746		14.1	0.0863601	-0.074704	0.219263	-0.200233	-0.0813984	-0.341287	0.375313	0.106281
14.2	-0.365089	0.223951	0.111044	0.0721614	0.0503934	0.0563349	-0.111398	-0.487249		14.2	0.0306816	0.231261	0.155148	-0.204809	-0.174154	-0.145169	0.41711	0.564617
14.3	-0.600937	0.0361911	-0.233091	-0.097463	0.202753	0.154833	-0.471047	-0.716276		14.3	0.348944	0.248296	0.108622	0.279473	-0.301279	-0.177633	0.302581	0.931673
14.4	-0.312802	-0.257805	-0.500893	-0.653884	0.452195	0.0717125	-0.522291	-0.408861		14.4	0.039193	0.494183	0.343234	0.264958	-0.243119	-0.113883	0.311961	0.497233
14.5	-0.156445	-0.0893875	-0.368274	-0.450415	0.349886	0.151853	-0.628952	-0.39099		14.5	0.0496329	0.204324	0.187274	0.168322	-0.145177	0.107361	0.328512	0.230172
14.6	-0.60161	0.10564	-0.37288	-0.3999	0.0323962	0.221037	-0.218196	-0.0999795		14.6	0.242884	-0.0658691	-0.0962753	0.381804	0.0334525	0.035771	0.253705	0.285126
14.7	-0.282757	0.333985	-0.303172	-0.504444	0.234507	0.162567	-0.227605	0.0301117		14.7	0.249267	0.132899	-0.126202	0.569729	-0.141004	-0.052273	0.0495024	0.465354
14.8	-0.347799	0.0133313	-0.487552	-0.26476	0.408105	-0.00781661	-0.297266	0.132017		14.8	0.452397	0.093271	0.306211	0.514999	0.000672247	0.196041	-0.0573203	0.401766
14.9	-0.0849109	0.248049	-0.177094	-0.443703	0.55305	0.152065	-0.464916	-0.116016		14.9	0.184338	0.241385	0.445701	0.509714	-0.31172	0.168832	0.20209	0.505391
15	-0.278139	0.314252	-0.0671227	-0.476132	0.644874	0.131272	-0.174357	-0.039759		15	0.11326	0.340742	0.00870122	0.60274	-0.177196	0.287327	0.119985	0.116057
15.1	-0.36798	0.209496	-0.132159	-0.540969	0.719539	0.171719	-0.148121	0.0879502		15.1	0.215247	0.198758	-0.0312631	0.797137	-0.311149	0.14715	0.0945453	0.00257356
15.2	-0.751011	0.36939	-0.0881628	-0.294689	0.62846	-0.105023	-0.271587	0.221367		15.2	0.266012	0.00465274	0.056354	0.497654	0.116028	0.407904	0.216839	-0.22702
15.3	-0.725937	0.269865	-0.0405953	-0.277741	0.541629	-0.313603	-0.51168	0.448502		15.3	0.231556	-0.0969219	-0.0241143	0.388922	0.167019	0.348019	0.0653587	-0.237979
15.4	-0.579584	0.19208	-0.0634374	-0.651894	0.571544	-0.118876	-0.689144	0.208644		15.4	0.150088	-0.155389	0.0266678	0.744539	0.335096	-0.00177094	0.022586	0.128463
15.5	-0.625908	0.410651	0.0670842	-0.569016	0.817602	-0.20855	-0.598227	-0.0168856		15.5	0.275613	0.019052	-0.137395	0.470929	0.259307	0.120218	-0.330103	0.48683
15.6	-0.677171	0.511183	-0.146456	-0.596463	0.765972	-0.0175425	-0.813297	-0.0145559		15.6	0.111961	-0.107463	0.161825	0.212402	0.0883479	0.120728	-0.0465864	0.156381
15.7	-0.723145	0.308122	0.0628298	-0.268853	0.319305	-0.36653	-0.394711	0.0763123		15.7	0.0973772	-0.260173	-0.0766894	0.0776389	0.490347	0.670065	-0.122317	0.00341237
15.8	-0.791808	0.0339392	-0.0420806	-0.378758	0.118168	-0.181446	-0.234223	-0.285178		15.8	0.30581	0.100413	-0.0839721	0.656733	0.490446	0.37972	0.100313	-0.136583
15.9	-0.782333	0.134425	-0.177141	-0.0694373	-0.0832538	-0.191695	-0.259533	-0.163896		15.9	0.527991	-0.164357	0.160028	0.107551	0.305467	0.291716	0.132686	-0.157224
16	-0.425859	0.255342	-0.151381	-0.0154655	-0.208746	0.118321	-0.131449	0.146863		16	0.267014	-0.227809	0.0764677	0.0987413	0.351358	-0.366895	0.187298	-0.0978084
16.1	-0.154885	0.214152	-0.0565365	0.350599	0.10385	0.580697	-0.209809	0.204855		16.1	0.130403	-0.140616	0.294125	-0.189112	0.230691	-0.569417	0.128669	0.156083
16.2	-0.0312948	0.184744	-0.338384	0.316536	0.0313883	0.5001	-0.535001	0.666882		16.2	0.379201	0.0689799	0.486633	-0.62527	0.173232	-0.352371	-0.0274889	-0.0600081
16.3	0.118348	0.482882	-0.326739	0.314986	0.37403	0.438218	-0.246154	0.477194		16.3	0.389151	-0.183764	0.404372	-0.623047	0.263562	-0.331683	-0.0532688	-0.221532
16.4	-0.0611085	0.569144	-0.450795	0.249972	0.241289	0.641474	-0.0566694	-0.187826		16.4	0.498733	-0.169777	0.191256	-0.332833	0.344319	-0.174607	-0.12415	0.0482881
16.5	-0.689332	0.356265	-0.328037	-0.23515	0.138296	0.559486	0.0793494	-0.144542		16.5	0.760024	-0.0377201	0.211685	0.277371	0.202671	0.0721252	-0.195271	0.168086
16.6	-0.537167	0.493933	-0.131432	0.115774	-0.0423305	0.268123	0.242411	-0.477867		16.6	0.667927	-0.147654	-0.248794	-0.0530386	0.566304	0.0672822	-0.114302	0.122052
16.7	-0.448332	0.583617	-0.236886	-0.0794238	0.133277	0.1049	-0.503715	-0.811633		16.7	0.550746	-0.0608882	-0.393293	0.0137184	0.482811	-0.0110051	0.192398	0.205332
16.8	-0.277713	0.340999	-0.356175	-0.0938838	-0.0640769	0.28683	-0.487917	-0.602128		16.8	0.531989	0.110267	-0.398661	0.214829	0.41141	-0.197582	0.017592	0.0220534
16.9	-0.280755	-0.106256	-0.373616	-0.293563	-0.180378	0.135124	-0.510639	-0.271647		16.9	0.342528	0.333781	-0.565164	0.38926	0.142694	0.0760986	0.263824	-0.151817
17	-0.431977	-0.457387	0.0436384	-0.27243	-0.403464	0.194029	-0.692205	-0.619084		17	0.482201	0.150577	-0.768925	0.365864	0.227212	0.0660522	0.175862	0.151467
17.1	-0.203475	-0.259429	0.0809116	-0.342282	-0.411857	0.130885	-0.432123	-0.303085		17.1	0.484293	0.0388637	-0.330815	0.517675	0.646624	0.354845	0.135907	0.0116492
17.2	-0.498399	-0.056767	0.112253	-0.421851	-0.142611	0.0997488	-0.375846	-0.327498		17.2	0.560995	0.000858556	-0.469668	0.874002	0.547087	0.327241	0.383408	-0.270861
17.3	-0.441848	0.291854	0.0627702	-0.37466	-0.0800337	0.240302	-0.444518	-0.158264		17.3	0.659036	-0.0548398	-0.557685	0.797045	0.197813	0.338977	0.634277	-0.287082
17.4	-0.269299	0.173923	-0.133188	0.0516267	-0.179492	0.447681	-0.182949	0.160642		17.4	0.274535	0.119758	-0.289691	0.441457	0.244459	0.143077	0.21811	-0.212242
17.5	-0.376867	0.0837983	0.235773	0.0917098	-0.188038	0.424258	-0.0247942	0.491144		17.5	0.436024	0.223689	-0.599075	0.167766	0.117917	0.0723566	-0.0536352	-0.562511
17.6	-0.30531	0.425083	0.200026	0.466906	0.149327	0.63009	0.179709	0.647301		17.6	0.188128	0.115407	-0.39778	0.184787	0.281938	-0.0962187	-0.38732	-0.460953
17.7	-0.743315	0.204832	0.416805	0.43986	0.352746	0.676697	0.0083244	0.604398		17.7	0.728329	0.220126	-0.342044	0.358106	0.33111	-0.320167	-0.382773	-0.593595
17.8	-0.847835	0.512003	-0.37006	0.235619	0.425314	0.592011	-0.0836511	0.239669		17.8	0.812242	-0.0152392	0.0627582	0.234689	0.0254607	-0.357407	0.0182125	-0.0510653
17.9	-1.07042	0.148436	-0.123105	0.150198	0.432198	-0.110455	-0.103909	0.203331		17.9	0.802205	0.41748	0.0013153	0.176796	-0.0790624	-0.126825	0.10856	-0.00327535
18	-0.342956	-0.28714	-0.160911	0.223465	0.438501	-0.289411	-0.231098	0.0341951		18	0.747641	0.418103	-0.0862729	-0.112764	0.0718746	0.181083	0.289125	0.0786931
18.1	-0.297813	0.0257527	-0.174807	0.158251	0.339714	-0.0933205	-0.182159	-0.269221		18.1	0.659324	-0.063345	-0.0635606	-0.0412068	-0.14779	0.330783	0.269806	0.180434
18.2	-0.334856	-0.0757094	0.0579837	0.0127379	0.593277	0.0804066	-0.0657758	-0.151169		18.2	0.622621	-0.0296218	-0.398717	-0.29427	-0.214918	0.413842	0.140884	0.166735
18.3	-0.276875	-0.0565154	-0.110235	-0.20567	0.188123	0.342103	0.156764	-0.386288		18.3	0.521895	-0.193638	-0.0927599	-0.0227918	0.0860246	0.463387	-0.00648588	0.118006
18.4	-0.260229	-0.0748673	0.32613	-0.149809	0.0700352	0.414716	0.330775	-0.236104		18.4	0.535959	-0.202608	-0.47802	0.0427996	0.0663958	0.212238	-0.00110441	-0.0281284
18.5	-0.597559	0.173237	0.0307379	-0.153309	0.219815	0.0626336	0.288801	-0.322612		18.5	0.675947	-0.38065	-0.365483	-0.294024	-0.0668454	0.264086	-0.184944	0.0890474
18.6	-0.747807	-0.0307451	0.310704	0.230552	0.22831	-0.0189389	0.205384	-0.626535		18.6	0.496649	-0.230274	-0.652189	0.048947	0.220935	0.368542	-0.138164	0.428804
18.7	-0.913833	0.170541	0.215099	-0.221721	0.445365	0.338554	-0.110164	-0.516852		18.7	0.831984	-0.309912	-0.302835	0.27962	0.124266	-0.255749	0.0613512	0.564821
18.8	-0.683556	0.050624	0.0172113	-0.410585	0.475561	0.382135	-0.630835	-0.406802		18.8	0.97528	-0.146663	-0.455443	0.338215	0.339151	-0.161506	0.479719	0.696438
18.9	-0.358267	-0.0300583	-0.43846	-0.547639	0.189022	0.0314558	-0.444594	0.0654758		18.9	0.398097	-0.174993	-0.219092	0.494093	0.527203	-0.241541	0.272528	0.3339
19	-0.142967	-0.411664	-0.421612	-0.546476	0.316034	-0.0440713	-0.702958	0.0912024		19	0.274374	0.0626877	0.00178271	0.323239	0.384992	-0.239167	0.26529	-0.082869
19.1	-0.448259	-0.86682	-0.0482097	-0.914365	0.426083	-0.0330348	-0.416138	-0.330788		19.1	0.384774	0.428531	0.00847092	0.638295	0.319252	-0.161734	0.115179	-0.0421616
19.2	-0.440574	-0.788256	-0.102991	-0.768843	0.838201	0.453875	-0.0421016	-0.59344		19.2	0.666519	0.530561	0.408436	0.645191	-0.256721	-0.350476	-0.220636	0.31662
19.3	-0.668687	-0.516157	-0.059016	-0.270356	0.649467	0.535835	0.210347	-0.797613		19.3	0.806068	0.561703	0.324734	0.441147	-0.0730525	-0.0863781	-0.359864	0.350192
19.4	-0.571824	-0.488779	-0.214034	0.360144	0.957948	0.883746	0.197979	-0.710666		19.4	0.770435	0.546215	0.587717	0.193627	-0.071036	-0.103533	-0.250913	0.138406
19.5	-0.301128	-0.232168	0.215629	1.13519	1.83059	1.00124	0.497315	-0.262025		19.5	0.72589	0.847256	0.846029	0.519571	-0.367216	0.512807	-0.309602	0.451312
19.6	0.406122	0.692221	1.22634	2.32912	3.04795	2.05388	0.907706	0.543434		19.6	1.09606	1.42209	1.05185	1.63437	-0.489212	0.984466	-0.308692	0.55867
19.7	1.23638	2.19127	2.91624	4.40229	5.44968	4.61623	2.25101	2.30519		19.7	2.21495	2.29629	2.08436	3.18943	-0.0135289	1.3063	-0.057762	0.439571
19.8	2.82688	3.76052	6.2549	7.98823	8.94513	8.28213	4.646	4.97133		19.8	3.30335	4.08094	2.61109	5.34345	0.317346	2.22445	0.326885	0.704974
19.9	4.87021	6.07601	10.6644	12.857	13.8694	13.1689	8.14528	8.7558		19.9	4.5929	6.23467	3.51937	7.82586	0.449106	2.9622	0.431598	1.11109
20	6.88635	8.82235	14.8752	17.7206	19.0196	19.2278	12.7742	13.4711		20	5.63989	8.04489	5.24504	10.6749	0.808424	3.21145	0.492003	1.59209
20.1	8.32937	10.7672	18.6243	21.718	24.0962	24.5527	16.2486	17.9936		20.1	5.07335	8.75373	6.42659	12.4096	1.09393	2.36525	0.569481	1.95389
20.2	6.44573	9.42014	13.5899	16.7214	19.0513	20.0963	18.8688	21.2522		20.2	2.19756	3.37723	2.26124	4.49465	0.430466	0.641987	0.0872953	1.60032
20.3	4.92078	7.08676	10.2109	12.0808	12.4448	12.0189	10.3872	12.5265		20.3	1.47385	2.19862	0.786097	2.55685	-1.11128	-1.35691	-2.82609	-2.47761
20.4	3.53117	5.25092	7.32109	7.76298	6.63037	3.9507	1.45468	3.93806		20.4	1.39687	1.78384	0.282693	2.56724	-0.973292	-1.55837	-2.71331	-2.52873
20.5	2.37647	3.95741	4.81492	3.84327	0.106991	-4.36254	-7.07391	-4.25653		20.5	1.22754	1.57152	0.374622	1.9105	-0.96435	-1.81841	-2.687	-2.25856
20.6	1.50998	2.87892	2.81495	-0.107118	-6.49827	-13.435	-14.9133	-11.1664		20.6	1.47127	1.68317	0.63862	1.77901	-0.997215	-2.16862	-2.99367	-1.70601
20.7	1.18199	2.21737	1.03763	-3.46399	-13.692	-21.8754	-22.2258	-16.9001		20.7	1.17933	1.76576	0.438274	1.21422	-0.671637	-2.52488	-3.17409	-1.27895
20.8	0.76505	1.62266	-0.584345	-6.97051	-20.3054	-28.9042	-27.2997	-20.5632		20.8	1.03156	1.33625	0.635297	0.629555	-1.25834	-3.27984	-3.21503	-1.29269
20.9	0.880695	1.22527	-1.61872	-10.5469	-26.3829	-35.048	-31.7919	-23.19		20.9	0.70374	1.38761	0.7427	0.208041	-2.05386	-3.8142	-3.26847	-1.54772
21	0.797288	0.756027	-2.58367	-14.2938	-31.8039	-40.0594	-35.372	-25.6913		21	0.416015	1.71276	0.555861	0.0136065	-2.40157	-4.17282	-3.49954	-1.53764
21.1	0.471166	0.454448	-2.9691	-17.4172	-36.8426	-43.7867	-38.038	-27.4223		21.1	0.444412	1.47507	0.3507	-0.403265	-2.6662	-4.49172	-3.54459	-1.49737
21.2	0.374887	0.323027	-4.09879	-20.3379	-41.1996	-46.9767	-40.0389	-28.2604		21.2	0.41416	0.831582	0.28117	-0.795128	-2.52075	-4.76839	-3.42818	-1.41215
21.3	0.415604	0.0674422	-4.7551	-23.2592	-44.8116	-49.3151	-41.9656	-28.9725		21.3	0.470317	0.759802	0.223343	-1.29978	-2.94109	-4.98506	-2.99669	-1.68599
21.4	0.197868	-0.131402	-5.88515	-25.6293	-48.4849	-51.349	-42.4572	-29.2977		21.4	0.385351	0.0757422	0.387109	-1.782	-3.0019	-5.39488	-3.56058	-1.6179
21.5	0.0205497	-0.429091	-6.7643	-27.8538	-50.7123	-52.3585	-43.1673	-29.9707		21.5	0.652662	0.221446	0.472624	-1.72515	-3.39124	-5.54588	-3.91048	-1.68293
21.6	-0.00855311	-0.500567	-7.45111	-29.9386	-52.4011	-53.1933	-43.3732	-30.2007		21.6	0.500578	0.36406	0.101793	-1.71003	-4.06759	-5.66853	-3.97287	-1.82287
21.7	-0.129312	-0.600512	-8.20697	-31.9918	-54.1781	-53.8382	-43.6806	-30.5315		21.7	0.564014	0.295958	0.0482881	-1.66894	-4.26036	-5.57511	-3.9334	-1.74495
21.8	-0.214928	-0.623364	-8.72416	-33.5034	-55.3049	-54.3433	-43.8079	-30.6565		21.8	0.611182	0.597219	0.219199	-1.3832	-4.96873	-5.51742	-4.1626	-1.54168
21.9	-0.102144	-0.566146	-8.80841	-34.846	-56.532	-54.8135	-43.6692	-30.653		21.9	0.395005	0.551975	0.275848	-1.68715	-4.81953	-5.12666	-4.07567	-1.4781
22	0.0897364	-0.708995	-9.00802	-36.1952	-57.4928	-55.5501	-43.2881	-30.7905		22	0.26413	0.684822	0.199493	-1.74905	-4.98703	-5.06694	-3.99259	-1.72972
22.1	0.270558	-0.69989	-9.19874	-37.8511	-57.6764	-55.5428	-43.4086	-30.8182		22.1	0.247196	0.691809	0.350807	-1.46007	-5.36003	-5.43967	-3.91077	-1.82557
22.2	0.243253	-0.982019	-9.31064	-39.0634	-58.0875	-55.6554	-43.3185	-30.5258		22.2	0.494613	0.885057	-0.0206911	-1.56256	-5.60241	-5.52247	-3.96231	-2.08918
22.3	0.300319	-1.12742	-9.78382	-39.968	-58.5998	-56.0088	-43.3365	-30.2991		22.3	0.558756	0.927131	-0.0123389	-1.87522	-5.6021	-5.10021	-3.97071	-2.05811
22.4	0.165329	-1.37	-10.117	-40.4738	-58.7401	-55.6652	-43.3197	-30.3942		22.4	0.783345	1.06138	-0.0519946	-2.04446	-5.50634	-5.27581	-4.25707	-2.10456
22.5	-0.233283	-1.24431	-10.3974	-41.194	-58.7032	-55.1652	-42.9045	-30.3107		22.5	0.925722	0.940236	-0.0986585	-2.4243	-5.71483	-5.57	-4.51466	-2.38191
22.6	0.103362	-1.12092	-10.6936	-42.2555	-58.3365	-54.8443	-43.0634	-30.279		22.6	0.956318	0.911901	-0.00269325	-2.3885	-5.95902	-6.01492	-4.44887	-2.42515
22.7	-0.0896621	-1.41671	-10.9655	-42.8038	-58.6979	-54.3751	-43.1338	-30.3061		22.7	0.744819	0.841171	0.367182	-2.30427	-5.98206	-6.15469	-4.57935	-2.47735
22.8	-0.055429	-1.13577	-10.9659	-43.1572	-58.6489	-53.84	-42.93	-30.3011		22.8	0.467083	0.380858	-0.0907682	-2.57865	-5.89049	-6.30143	-4.70124	-2.55514
22.9	-0.418853	-1.31449	-10.8661	-43.8527	-58.8415	-54.199	-43.0253	-30.2893		22.9	0.488062	0.616056	-0.170868	-2.41168	-5.83199	-6.16409	-4.73646	-2.43361
23	-0.586126	-1.30019	-11.3369	-43.9387	-58.5653	-54.4022	-43.0684	-30.4442		23	0.375234	0.363005	-0.253993	-2.54998	-5.85624	-6.0703	-4.96081	-2.19915
23.1	-0.319888	-1.08063	-11.7552	-43.7885	-58.1729	-54.403	-43.0824	-30.2346		23.1	0.337973	0.343828	-0.187578	-3.26171	-6.15405	-6.10268	-4.74092	-2.63441
23.2	-0.0791826	-1.30215	-11.66	-43.8072	-58.3351	-54.9025	-42.7279	-30.1671		23.2	0.143248	0.574987	-0.634527	-3.30733	-5.84775	-6.22944	-4.9182	-2.77738
23.3	-0.201997	-1.30803	-11.5802	-44.2172	-58.2159	-54.426	-42.1827	-29.7805		23.3	0.262867	0.285155	-0.977782	-3.18728	-5.74665	-6.25663	-5.2615	-3.04826
23.4	0.199105	-1.05997	-11.3402	-44.0396	-58.318	-54.7458	-41.9482	-29.8895		23.4	0.1714	0.15131	-1.09079	-3.31015	-5.52986	-5.93883	-5.26362	-2.97244
23.5	0.0675251	-0.973973	-11.2963	-44.6777	-58.3273	-54.8817	-41.8837	-30.1335		23.5	0.15866	0.226885	-1.21061	-3.00947	-5.85576	-6.01313	-5.19588	-2.90269
23.6	-0.00860875	-1.16122	-11.8892	-44.9927	-58.1633	-54.8224	-41.9993	-29.8712		23.6	-0.0153761	-0.0795703	-0.391842	-3.17522	-5.84255	-6.12558	-5.08687	-3.29095
23.7	0.133162	-1.28423	-11.6992	-45.1778	-58.4264	-54.6887	-42.3166	-29.7585		23.7	-0.197304	0.303587	-0.53989	-3.30203	-5.90362	-6.44205	-4.97452	-3.39511
23.8	0.123681	-1.39679	-11.7331	-45.2291	-57.9497	-54.7616	-42.2415	-29.7295		23.8	0.0236649	0.203252	-0.622326	-3.0725	-6.12524	-6.53416	-5.19316	-3.16871
23.9	0.421886	-0.927813	-11.8037	-45.347	-58.1672	-54.3984	-42.2475	-29.7597		23.9	-0.00130458	-0.0310293	-0.755892	-3.09554	-5.97843	-6.76352	-5.20011	-3.06674
24	0.0832788	-0.892103	-11.9497	-45.8068	-58.2359	-54.3651	-42.2248	-30.2715		24	0.492294	-0.226777	-0.860657	-3.1065	-5.88926	-6.56475	-5.21984	-2.70221
24.1	-0.0921492	-0.805588	-12.3645	-45.6261	-57.8888	-54.1092	-42.3913	-30.2694		24.1	0.138099	0.10267	-0.570094	-3.35909	-6.18489	-6.50275	-4.73362	-2.72806
24.2	0.0331804	-0.535152	-12.4434	-45.667	-57.6899	-54.4968	-42.0773	-30.3349		24.2	0.220733	0.0769305	-0.790074	-3.31518	-6.3702	-6.27635	-5.06899	-2.29734
24.3	0.177087	-0.894795	-12.4849	-45.9283	-57.5169	-54.1343	-41.9843	-29.9357		24.3	0.0673342	0.255572	-0.47816	-2.95157	-6.57378	-6.40603	-4.95179	-2.43328
24.4	0.335474	-0.92924	-12.6994	-46.2815	-57.7405	-54.2344	-42.1998	-29.7605		24.4	0.0426886	0.134225	-0.267768	-2.78126	-6.52796	-6.11996	-4.82179	-2.45378
24.5	0.318026	-1.07166	-12.4405	-46.331	-58.0505	-54.0511	-41.9713	-29.9149		24.5	0.404935	0.0494281	-0.235129	-2.61345	-6.42516	-6.47349	-5.01401	-2.28112
24.6	0.0800769	-1.40614	-12.7384	-46.2002	-57.9455	-54.1219	-42.1108	-29.7763		24.6	0.654169	0.0665437	-0.0569021	-2.8719	-6.48576	-6.16955	-4.617	-2.24913
24.7	-0.0887854	-1.25789	-12.3687	-46.1505	-57.8817	-54.1294	-42.3671	-29.4759		24.7	0.696974	0.317247	-0.0510681	-3.29894	-6.66937	-5.96411	-4.54555	-2.81376
24.8	-0.212247	-1.51168	-12.4528	-45.9857	-57.9278	-53.8767	-42.355	-29.5388		24.8	0.793737	0.583834	-0.270651	-3.48338	-6.09255	-5.61845	-4.62193	-3.00994
24.9	0.0844095	-1.64028	-12.6347	-45.8679	-57.833	-53.5413	-42.5191	-29.4938		24.9	0.64589	0.612003	-0.285379	-3.41227	-6.19301	-5.75234	-5.0373	-2.93437
25	0.0878185	-1.34212	-12.557	-45.6383	-58.1577	-53.2718	-42.2937	-29.6391		25	0.876965	0.497	-0.284725	-3.51237	-6.07007	-6.16829	-5.01774	-2.77236
25.1	0.0516284	-1.3491	-12.6775	-45.8652	-58.2214	-53.4671	-42.1459	-29.0908		25.1	0.940114	0.471523	-0.217342	-3.31548	-6.10289	-6.05195	-5.12355	-3.05497
25.2	0.771221	-1.47191	-12.5728	-45.4426	-57.9818	-53.4429	-42.1754	-29.2983		25.2	0.58328	0.808181	-0.101089	-3.26262	-5.97664	-5.99868	-5.18179	-3.07813
25.3	0.253787	-1.62688	-12.3556	-45.2729	-57.9122	-53.4349	-42.1185	-28.9486		25.3	0.440638	1.09213	-0.138249	-3.19465	-6.46089	-6.04755	-5.42172	-3.29937
25.4	-0.0290926	-1.48601	-12.3563	-45.4961	-57.513	-53.2004	-42.1456	-28.7601		25.4	0.93037	1.02038	-0.0693316	-2.88627	-6.46796	-6.12047	-5.29244	-3.37323
25.5	-0.17592	-0.937606	-11.7696	-45.8166	-57.4525	-53.5185	-41.9947	-28.9692		25.5	0.86272	0.509841	-0.425675	-2.86747	-6.59925	-5.86169	-5.2725	-3.07629
25.6	-0.29129	-0.604776	-11.6478	-45.989	-57.5591	-53.6748	-42.1088	-28.9798		25.6	1.20179	0.637167	-0.820965	-2.9136	-6.63388	-5.43006	-5.32713	-3.24055
25.7	-0.308513	-0.680616	-11.7776	-45.8614	-57.7132	-53.8982	-42.005	-28.9708		25.7	1.06241	0.257523	-0.442041	-3.16827	-6.42749	-5.50339	-5.59233	-3.14558
25.8	-0.700041	-0.265303	-11.6488	-45.8292	-57.5142	-53.7597	-41.929	-28.8357		25.8	1.05131	-0.163643	-0.542912	-3.46245	-6.85876	-5.67988	-5.72449	-2.93875
25.9	-0.744727	-0.604024	-12.0861	-46.1985	-57.6885	-53.5253	-42.1535	-29.1223		25.9	0.996703	-0.086783	-0.626261	-3.38183	-6.97136	-5.80789	-5.28243	-3.00995
26	-0.187178	-0.418335	-12.5448	-46.1388	-57.8245	-53.8088	-42.3818	-29.1462		26	0.729912	-0.383266	-0.280186	-3.52083	-6.83297	-5.77745	-5.30557	-2.99503
26.1	-0.26098	-0.610571	-12.8373	-46.4332	-58.014	-53.9215	-42.0601	-29.3717		26.1	0.319906	0.0755627	0.047942	-3.43541	-6.90096	-5.5889	-5.45387	-2.86228
26.2	-0.38209	-0.911331	-12.5877	-46.1696	-57.9011	-53.7603	-41.8864	-29.3188		26.2	0.374605	0.475224	-0.289927	-3.4067	-6.43228	-5.61873	-5.26367	-3.14441
26.3	-0.284686	-1.3581	-12.7088	-46.3409	-57.6861	-53.3933	-41.8153	-29.1233		26.3	0.4002	0.745448	-0.296131	-3.47722	-6.40799	-5.97826	-5.42226	-3.00238
26.4	-0.511661	-1.19064	-12.9017	-46.2319	-57.6129	-52.7677	-41.5858	-29.209		26.4	0.392218	0.864959	0.0492818	-3.43251	-6.35934	-6.26715	-5.59796	-2.91107
26.5	-0.215002	-1.42559	-12.7279	-46.3164	-57.1533	-52.3573	-41.7906	-29.2576		26.5	0.426896	0.995588	-0.425894	-3.46769	-6.4907	-6.56432	-5.58725	-2.64048
26.6	0.0503903	-1.22803	-12.2361	-46.0154	-56.7956	-52.5489	-42.0936	-28.8386		26.6	0.201064	0.631139	-0.585986	-3.20642	-6.78041	-6.39714	-5.50558	-2.67687
26.7	0.490272	-1.07931	-12.2494	-45.7235	-56.6083	-52.5263	-41.9719	-28.8769		26.7	0.23113	0.496519	-0.467366	-3.37156	-6.87049	-6.42779	-5.73268	-2.77854
26.8	0.347419	-1.35748	-12.1915	-45.5904	-56.4643	-52.4851	-41.8234	-29.0976		26.8	0.334148	0.657522	-0.578387	-3.30237	-6.86682	-6.24467	-5.59289	-2.64093
26.9	0.15293	-1.47254	-12.4597	-45.6319	-56.8561	-52.3432	-41.4575	-29.2343		26.9	0.373089	0.66412	-0.063759	-3.3876	-6.53208	-6.31597	-5.62652	-2.54502
27	0.244406	-1.05027	-12.5108	-45.4799	-57.1324	-52.691	-41.4514	-29.2542		27	0.235215	0.630657	0.233166	-3.57744	-6.27741	-5.98101	-5.44922	-2.7453
27.1	-0.0893003	-0.64232	-12.5116	-45.2964	-56.7753	-52.3898	-41.1679	-29.1625		27.1	0.705444	-0.0649532	0.161863	-3.95145	-6.53667	-6.28327	-5.77288	-2.66356
27.2	0.236301	-0.728232	-12.52	-45.2057	-56.2267	-52.5299	-41.21	-29.3564		27.2	0.70683	0.160301	-0.07457	-3.90697	-6.54672	-6.2088	-5.94175	-2.52697
27.3	-0.0144297	-0.461549	-12.5457	-45.0856	-56.2043	-52.5696	-41.015	-29.3798		27.3	0.450681	0.138413	-0.170083	-3.71312	-6.20339	-6.01484	-5.69154	-2.57053
27.4	0.261429	-0.947084	-12.4144	-44.9692	-56.0404	-52.5864	-41.0386	-29.4382		27.4	0.244107	0.45592	-0.197947	-3.51502	-6.18015	-6.08475	-5.65365	-2.59572
27.5	0.168886	-0.957136	-12.2157	-44.6847	-56.0328	-52.7323	-41.3172	-29.7608		27.5	0.160583	0.462233	-0.279441	-3.02361	-6.22005	-6.22141	-5.14607	-2.59606
27.6	0.225625	-1.32044	-12.1057	-44.5235	-56.1763	-52.6589	-41.0082	-29.6798		27.6	-0.219281	0.616558	-0.645684	-3.29223	-6.25911	-6.10297	-5.11002	-2.49115
27.7	-0.127256	-1.09796	-12.1787	-44.7846	-55.9959	-52.6315	-41.0064	-29.4611		27.7	-0.118054	0.319298	-0.757445	-3.33824	-6.3895	-6.06648	-5.02318	-2.35103
27.8	-0.164388	-1.29149	-12.2068	-44.8051	-55.7507	-52.082	-40.7974	-29.6365		27.8	-0.123661	0.505553	-0.875962	-3.36596	-6.3003	-6.47395	-5.66755	-2.10708
27.9	-0.302512	-1.42925	-12.1126	-44.598	-55.6553	-52.0258	-40.786	-29.3553		27.9	-0.13157	0.419937	-0.647582	-3.64909	-6.88916	-6.51966	-5.34749	-2.3445
28	-0.508809	-1.24339	-11.7528	-44.8935	-55.4344	-51.9356	-41.2604	-29.3177		28	-0.00795998	0.20885	-0.978872	-3.4722	-6.93789	-6.43132	-5.2418	-2.58138
28.1	-0.302892	-1.3544	-11.4791	-45.0972	-55.6784	-52.2166	-41.2176	-29.3317		28.1	-0.107876	0.427196	-1.0052	-3.18005	-6.89381	-6.34874	-4.99306	-2.47799
28.2	-0.40723	-1.29436	-11.4574	-45.2199	-55.8116	-52.3006	-41.1708	-28.8944		28.2	0.350763	0.622907	-1.14154	-3.08397	-6.86332	-6.13035	-4.85208	-2.50277
28.3	-0.258956	-1.09775	-11.8547	-45.3035	-56.0809	-52.3435	-41.451	-29.0979		28.3	0.49136	0.584034	-0.87493	-3.0093	-6.08021	-6.16364	-4.91054	-2.27171
28.4	-0.316663	-0.830226	-11.9954	-45.143	-56.0654	-52.5704	-40.9657	-29.349		28.4	0.782686	0.641355	-0.67493	-3.03737	-5.88224	-5.90929	-5.17258	-1.94314
28.5	-0.0949233	-0.872735	-11.5234	-44.827	-56.2996	-52.6795	-40.3345	-29.5259		28.5	0.961078	0.746616	-0.727403	-3.37297	-5.67093	-5.87121	-5.19754	-2.06617
28.6	0.0464744	-1.28872	-11.7332	-45.2141	-56.4046	-52.5226	-40.5439	-29.3993		28.6	0.378504	0.760637	-0.541662	-3.28269	-5.48148	-5.92897	-4.77232	-2.09722
28.7	-0.176294	-1.14391	-11.8924	-44.9282	-56.5827	-52.3076	-40.6461	-29.2525		28.7	0.62263	0.539446	-0.496875	-3.25826	-5.61643	-6.26693	-5.3737	-2.19188
28.8	-0.18803	-0.92105	-11.8711	-44.4565	-56.4136	-52.3674	-41.1032	-29.0688		28.8	0.389704	0.452267	-0.800703	-3.48072	-5.77904	-6.1911	-5.61868	-2.61349
28.9	-0.31445	-1.28524	-11.7246	-44.2981	-56.6073	-52.0556	-41.2553	-28.7826		28.9	0.309828	0.517327	-0.748887	-3.5376	-5.64957	-6.1359	-5.51947	-2.88346
29	-0.180172	-1.2386	-11.9293	-44.8512	-56.1525	-52.0355	-41.1264	-28.7821		29	0.367274	0.417072	-0.492292	-3.26073	-5.7835	-6.44606	-5.45045	-2.63821
29.1	-0.0378326	-1.48316	-12.142	-44.7078	-56.0143	-51.6841	-41.2767	-28.6785		29.1	0.282252	0.624031	-0.0458205	-3.27689	-5.71228	-6.75261	-5.08636	-2.63668
29.2	0.379441	-1.3675	-12.0481	-44.7143	-55.8194	-51.2846	-40.9185	-28.881		29.2	0.0537185	0.844784	-0.0168237	-3.22041	-5.79684	-6.67839	-5.4678	-2.44352
29.3	0.199562	-1.24813	-12.179	-44.5928	-55.5367	-51.069	-40.6096	-29.2921		29.3	0.349803	0.643605	-0.18956	-3.30714	-5.70299	-6.68251	-5.72254	-2.39153
29.4	-0.273973	-1.22359	-12.3478	-44.4221	-55.7102	-51.2914	-40.6785	-29.8505		29.4	0.66711	0.833194	0.0646392	-3.72712	-5.82867	-6.41416	-5.75257	-1.84803
29.5	-0.37464	-1.00735	-12.6475	-44.5332	-55.9075	-51.0113	-40.6401	-29.7562		29.5	0.698784	0.689181	0.213545	-3.58294	-5.85891	-6.30465	-5.79551	-2.14473
29.6	-0.00943022	-0.911558	-12.5488	-44.767	-56.3923	-51.1386	-40.8226	-29.459		29.6	0.301846	0.525853	0.133614	-3.55142	-6.01664	-6.15789	-5.69862	-2.17028
29.7	0.0612243	-0.623214	-12.6377	-44.8091	-56.6534	-51.0833	-41.1057	-29.6641		29.7	0.209052	0.368361	0.0485002	-3.58426	-6.08256	-6.3457	-5.20953	-2.55975
29.8	-0.0878161	-0.780704	-12.778	-45.0296	-56.3994	-50.6589	-41.4231	-29.3367		29.8	0.331104	0.0847198	1.89454e-05	-3.43415	-5.98267	-6.39086	-4.86907	-2.40449
29.9	0.188425	-0.707961	-12.8776	-45.1634	-56.312	-51.0434	-41.2327	-29.1446		29.9	0.334809	0.0136884	-0.22539	-3.35854	-6.03321	-6.41695	-4.86559	-2.38371
30	-0.0516401	-1.02876	-12.7507	-45.3291	-56.2727	-50.7135	-41.0585	-28.8993		30	0.565252	0.089903	-0.557119	-3.0918	-5.98681	-6.85019	-4.86844	-2.4705
30.1	-0.165446	-1.0564	-12.8249	-45.5667	-56.2114	-50.8937	-40.5272	-28.6301		30.1	0.742222	0.400498	-0.447806	-3.01859	-5.95779	-6.81465	-4.97	-2.44599
30.2	-0.253517	-1.12611	-12.5279	-45.6376	-56.1425	-50.5891	-40.3333	-28.4858		30.2	0.928083	0.346057	-0.243853	-2.86794	-5.62397	-6.74964	-4.66145	-2.64922
30.3	-0.426742	-0.983215	-12.3404	-45.7172	-56.0027	-50.9178	-40.1613	-28.5045		30.3	1.16784	0.48365	-0.575462	-3.16791	-5.38599	-6.50957	-4.82941	-2.84981
30.4	-0.0567518	-0.84838	-12.3732	-45.7435	-56.0006	-51.1576	-40.2691	-29.0039		30.4	0.594232	0.33814	-0.559944	-3.35579	-5.73983	-6.40699	-5.30681	-2.61312
30.5	0.13537	-0.869523	-12.1978	-45.1799	-55.7405	-51.2423	-40.5053	-29.5491		30.5	0.586194	0.490993	-0.488371	-3.57608	-6.08351	-6.59237	-4.92307	-2.64413
30.6	0.0673279	-0.77836	-12.2732	-45.0136	-55.5119	-51.4717	-40.6418	-30.1048		30.6	0.53657	0.68037	-0.508216	-3.48495	-6.00857	-6.25613	-4.37804	-2.09576
30.7	-0.149396	-1.16886	-12.606	-44.8009	-55.5483	-51.4132	-40.4577	-30.2159		30.7	0.590467	1.03852	-0.335951	-3.19592	-5.84179	-6.34531	-4.90517	-2.2781
30.8	-0.316761	-1.08334	-12.3298	-44.6307	-55.6241	-50.9943	-40.9987	-30.2784		30.8	0.555488	1.00736	-0.497833	-3.18962	-5.71222	-6.59946	-4.40602	-2.49014
30.9	-0.236683	-1.21321	-12.5558	-44.7279	-55.6737	-50.8339	-41.1078	-29.863		30.9	0.819089	1.20725	-0.469957	-3.22329	-5.59529	-6.40963	-4.76466	-2.42079
31	0.161096	-1.31675	-12.3851	-44.5746	-55.572	-50.9418	-40.9635	-29.4892		31	0.51255	0.917805	-0.31868	-3.26275	-5.46125	-6.44354	-5.10571	-2.55159
31.1	0.16101	-1.02706	-12.4116	-44.8813	-55.166	-50.7858	-41.255	-29.8953		31.1	0.410276	0.514544	-0.105807	-3.33298	-5.57483	-6.59183	-4.92415	-2.52861
31.2	-0.00840884	-1.15842	-12.2966	-44.7212	-55.0334	-50.5585	-41.3722	-29.6663		31.2	0.55405	0.779932	0.0300716	-3.3908	-5.64124	-6.60201	-5.02365	-2.31063
31.3	0.115429	-1.42026	-11.9964	-44.8854	-55.0989	-50.8322	-41.1239	-29.5657		31.3	-0.0105443	0.860743	-0.107544	-3.33745	-6.02857	-6.51752	-4.93927	-2.42903
31.4	0.354442	-1.7413	-12.0118	-45.1476	-54.9992	-50.3597	-40.9585	-29.7837		31.4	0.0942346	0.869551	-0.362712	-3.20804	-6.02746	-6.32268	-5.06059	-2.31321
31.5	-0.112104	-1.64312	-12.2054	-45.203	-55.2303	-50.1721	-41.0637	-29.9112		31.5	0.672676	0.891692	-0.117006	-3.21218	-6.01815	-6.4028	-4.95052	-1.98243
31.6	-0.249368	-1.62799	-12.4272	-45.17	-55.1204	-50.2385	-40.7181	-29.6686		31.6	0.740142	1.02856	-0.079207	-3.41447	-6.04981	-6.19839	-5.1932	-1.99744
31.7	-0.420364	-1.63879	-12.6554	-45.1274	-54.989	-50.2814	-40.6492	-29.6315		31.7	0.933008	0.677392	0.192109	-3.60998	-6.11335	-6.33935	-4.95715	-1.91906
31.8	-0.189775	-1.72475	-12.8557	-44.4381	-55.1655	-50.3862	-41.2028	-29.7983		31.8	0.541821	0.502089	0.125023	-3.98893	-5.81442	-6.20435	-4.72778	-2.06365
31.9	-0.145592	-1.31382	-12.8072	-44.3258	-54.9813	-50.6073	-41.1211	-29.2329		31.9	0.572052	0.512496	-0.305379	-3.94674	-5.81409	-5.96587	-5.14698	-2.45319
32	-0.113492	-1.40149	-13.034	-44.0689	-55.1451	-50.8661	-40.7677	-29.2698		32	0.462981	0.242751	-0.266242	-4.09113	-5.68168	-5.92153	-5.18198	-2.29031
32.1	0.00381724	-1.10084	-13.1287	-44.1738	-54.4915	-50.6482	-40.8144	-29.2618		32.1	-0.0629747	0.0805235	-0.0630977	-3.95685	-6.0759	-5.70081	-5.29578	-2.38308
32.2	-0.0889155	-1.01409	-12.9793	-43.9756	-54.464	-50.7065	-41.0498	-29.0887		32.2	-0.302125	0.0222956	-0.0617955	-3.99042	-5.90288	-5.76428	-5.30247	-2.54612
32.3	-0.197889	-0.772491	-12.987	-44.258	-54.3129	-50.9729	-40.8381	-29.047		32.3	-0.309254	-0.146683	0.355154	-4.14715	-5.96018	-5.49367	-5.12734	-2.46513
32.4	-0.146145	-0.947299	-12.8305	-43.539	-54.2815	-50.7505	-40.2422	-29.046		32.4	0.0574508	0.150341	0.10684	-4.59676	-5.86041	-5.42529	-5.40331	-2.31125
32.5	-0.107453	-1.1762	-12.4106	-43.2919	-54.6531	-50.524	-40.4546	-28.9857		32.5	0.00076789	0.161449	0.0416618	-4.7749	-5.50952	-5.70156	-4.9173	-2.09789
32.6	-0.273567	-1.25987	-12.0838	-43.8147	-54.5908	-50.5751	-40.1418	-28.9909		32.6	0.080418	0.318676	-0.353039	-4.40435	-5.9351	-5.82675	-4.8007	-2.11932
32.7	0.0675538	-1.11052	-12.3776	-43.8049	-54.7036	-50.5398	-40.34	-28.8604		32.7	0.0526635	0.522481	-0.455934	-4.13478	-6.1021	-6.11127	-4.68559	-2.17771
32.8	0.234317	-1.26697	-12.3098	-44.0938	-54.4248	-50.235	-39.8928	-29.0308		32.8	0.237566	0.733647	-0.635041	-3.74036	-5.86056	-6.26188	-4.85922	-2.07042
32.9	0.324098	-1.39396	-12.2169	-44.0707	-54.4429	-50.5209	-40.3661	-28.9921		32.9	0.309256	0.955244	-0.826538	-3.92756	-5.67887	-6.20809	-4.80945	-1.88563
33	0.208601	-1.73894	-12.3232	-43.6793	-54.3758	-50.6245	-39.9338	-28.8248		33	0.187936	1.09526	-0.861827	-3.66836	-5.63011	-6.24425	-5.13435	-1.89318
33.1	0.0386256	-1.61739	-12.2127	-43.7239	-54.3412	-50.7309	-40.052	-28.797		33.1	0.495921	0.62041	-0.927963	-3.55051	-5.87547	-6.23614	-5.17092	-2.1078
33.2	-0.392762	-1.30583	-12.208	-43.5347	-54.5185	-50.4138	-40.3179	-29.0497		33.2	0.544203	0.584619	-0.756464	-3.81542	-5.76092	-6.20366	-4.96003	-2.06853
33.3	-0.369921	-1.313	-12.1637	-43.6444	-54.3122	-50.3257	-40.901	-28.9854		33.3	0.440459	0.419492	-0.854033	-3.72378	-5.60741	-6.02738	-4.74167	-2.09251
33.4	-0.151728	-1.65654	-12.3483	-43.8038	-54.1847	-50.0085	-41.3081	-29.1437		33.4	0.0319554	0.246867	-1.17596	-3.75739	-5.73568	-6.44416	-4.29143	-1.98567
33.5	0.121321	-1.03728	-12.5069	-43.9521	-54.0804	-50.362	-41.1028	-29.1585		33.5	0.169621	0.257735	-0.900926	-3.60967	-5.56282	-6.12448	-4.2287	-1.83978
33.6	0.11874	-0.958441	-12.4788	-43.5629	-53.73	-50.3744	-41.0896	-29.3773		33.6	0.223745	0.143382	-0.612641	-3.88964	-5.62544	-6.40957	-4.33923	-1.98173
33.7	0.00227906	-0.809715	-12.638	-43.4503	-53.5968	-50.2897	-41.0358	-29.3724		33.7	0.433712	0.265518	-0.593754	-4.05285	-5.80736	-6.72347	-4.48296	-1.82568
33.8	-0.348812	-0.928518	-12.8128	-43.4531	-53.3539	-50.4258	-40.9033	-28.9772		33.8	0.993786	0.147575	-0.297702	-4.10351	-6.15462	-6.78738	-4.72856	-2.07937
33.9	-0.530164	-1.0104	-12.5762	-43.6023	-53.7173	-50.1462	-40.9314	-29.067		33.9	0.894506	0.669741	-0.580829	-4.07991	-5.84445	-7.07447	-4.85168	-1.82023
34	-0.416268	-1.17429	-12.4295	-44.1528	-54.1024	-49.7438	-41.0768	-29.1315		34	0.758462	0.990635	-0.791374	-3.27656	-6.10571	-7.12124	-4.79737	-1.89974
34.1	-0.465251	-1.20416	-12.6089	-44.4805	-54.1899	-49.2004	-40.7677	-29.4161		34.1	0.572701	1.05501	-0.496392	-3.2441	-6.09	-7.1817	-5.04199	-2.11107
34.2	-0.289097	-1.40945	-12.641	-44.3358	-54.3406	-49.3498	-40.8056	-29.318		34.2	0.208538	0.997825	-0.664013	-3.2486	-6.31622	-7.08994	-4.84906	-2.41128
34.3	-0.500211	-1.38055	-12.9052	-44.488	-54.4899	-49.5094	-40.5663	-29.4597		34.3	0.343936	0.644214	-0.590287	-3.19951	-5.86777	-6.89446	-4.81712	-2.32773
34.4	-0.128143	-1.13382	-12.8035	-44.5322	-54.509	-49.6121	-40.4586	-29.3455		34.4	0.175159	0.441824	-0.696764	-3.20751	-5.51441	-6.82134	-4.35734	-2.37829
34.5	-0.232513	-0.565386	-12.7596	-44.3318	-54.7193	-49.7673	-40.3891	-29.5909		34.5	0.383902	0.214609	-0.450583	-3.23719	-5.32958	-6.68989	-4.34077	-2.20863
34.6	-0.221596	-0.771694	-12.5659	-44.3046	-54.524	-49.7199	-40.5422	-29.6481		34.6	0.234092	0.204708	-0.696353	-3.51097	-5.48041	-6.61494	-4.5021	-2.31858
34.7	-0.0359563	-0.630936	-12.7699	-44.342	-54.3263	-49.6632	-40.793	-29.9798		34.7	0.0167824	0.0574596	-0.255379	-3.67728	-5.46136	-6.68804	-4.12093	-2.05792
34.8	0.111929	-0.500418	-12.7573	-44.5161	-54.2281	-49.9628	-41.0745	-30.002		34.8	0.0455031	0.205584	-0.393396	-3.38846	-5.6054	-6.59484	-4.28028	-2.30774
34.9	-0.305562	-0.30579	-13.1179	-44.2735	-54.1801	-50.2722	-41.2263	-29.8166		34.9	0.087895	0.427616	-0.0892933	-3.55488	-5.804	-6.15787	-4.37034	-2.51577
35	-0.278768	-0.652319	-13.2251	-44.0497	-53.5977	-50.4653	-41.0607	-30.0844		35	0.0584944	0.79537	0.0404568	-3.85109	-5.93775	-5.96714	-4.41667	-2.27476
35.1	-0.304383	-1.03333	-13.0977	-43.8466	-53.3959	-50.2241	-40.9926	-30.3142		35.1	-0.185697	0.91152	-0.246856	-3.70292	-6.04902	-5.97514	-4.46026	-2.12613
35.2	0.0255428	-0.950441	-12.9333	-44.0107	-53.3315	-50.2237	-40.8713	-30.1109		35.2	-0.127943	0.872522	0.139766	-3.57709	-6.13789	-5.76703	-4.5153	-2.1836
35.3	0.109037	-1.06883	-13.0171	-43.7809	-53.4098	-50.1785	-40.7071	-29.8408		35.3	-0.0524638	0.94818	-0.149657	-3.85313	-5.85122	-5.89392	-4.67022	-2.47631
35.4	0.252736	-0.897771	-12.8236	-43.8206	-53.7614	-50.0712	-40.4278	-29.8198		35.4	-0.19102	0.373487	-0.414565	-3.65502	-5.69727	-5.8826	-4.53504	-2.70843
35.5	0.349243	-0.734531	-12.8142	-43.3206	-53.6191	-50.1082	-40.7044	-29.2529		35.5	0.442614	0.239728	-0.0998577	-4.05945	-5.77555	-5.75905	-4.5973	-2.68076
35.6	-0.0470695	-1.03562	-13.0324	-43.0784	-53.7328	-50.2356	-41.1803	-29.1123		35.6	0.290453	0.383999	0.0979964	-4.22276	-5.81733	-5.95845	-4.3442	-2.45677
35.7	0.229888	-1.03437	-13.2526	-42.6831	-53.6862	-50.3825	-41.3083	-29.0681		35.7	0.487795	0.449691	0.0407548	-4.31176	-5.73725	-5.81125	-4.53147	-2.35045
35.8	-0.0546351	-1.04564	-12.6561	-42.8697	-53.6358	-50.3307	-41.2473	-29.3873		35.8	0.701274	0.520797	-0.435325	-4.46583	-5.66445	-5.65634	-4.6202	-2.17396
35.9	0.052266	-1.06238	-12.4293	-43.1039	-53.8264	-50.0815	-40.9028	-29.3867		35.9	0.555143	0.813116	-0.807684	-4.50447	-5.74691	-6.39711	-4.829	-2.07278
36	-0.122508	-1.50069	-12.4749	-43.4108	-53.9916	-49.9984	-40.9099	-29.3337		36	0.522826	1.11974	-0.685697	-4.2336	-5.65044	-6.59351	-4.83339	-2.30792
36.1	-0.111968	-1.40638	-12.2599	-43.6029	-53.9875	-49.8849	-41.1419	-29.0846		36.1	0.669883	0.655809	-0.756716	-4.1211	-5.81861	-6.43104	-4.70865	-2.48565
36.2	0.156755	-1.26076	-12.161	-43.8137	-54.0858	-50.0055	-40.7022	-28.9982		36.2	0.36833	0.689779	-0.551307	-3.55312	-5.99979	-6.31131	-4.96471	-2.73065
36.3	0.10571	-1.35228	-12.4938	-43.5851	-54.1516	-49.9456	-40.4937	-29.0797		36.3	0.652117	0.360508	-0.511369	-3.60812	-6.17323	-6.34681	-5.03511	-2.54949
36.4	0.234508	-1.25783	-12.557	-43.3983	-54.2214	-49.89	-40.5324	-28.9235		36.4	0.780909	0.533953	-0.553956	-3.80748	-6.09431	-6.20839	-4.91618	-2.53953
36.5	-0.196926	-1.017	-12.9742	-43.6193	-53.8612	-50.1129	-40.3987	-28.8683		36.5	1.16358	0.477843	-0.3609	-3.77674	-6.24704	-6.41375	-5.24555	-2.9059
36.6	-0.589565	-0.725175	-13.2114	-43.9641	-54.1903	-50.0853	-40.5366	-28.7691		36.6	1.30807	0.261164	-0.142508	-3.39196	-6.01779	-6.15648	-5.138	-3.2647
36.7	-0.809518	-0.60305	-13.2989	-43.7914	-54.0696	-49.7932	-40.2476	-28.8115		36.7	1.20243	0.332991	-0.0778612	-3.39895	-6.02886	-6.17394	-5.31458	-3.3981
36.8	-0.691007	-0.941849	-13.1762	-43.7396	-54.1478	-49.5952	-40.2311	-28.7779		36.8	1.18762	0.783934	0.0477625	-3.75688	-6.04454	-6.353	-5.47758	-3.73102
36.9	-0.667122	-1.14132	-13.3323	-43.6978	-54.3119	-49.6072	-40.2567	-29.0813		36.9	1.11214	0.996514	0.232564	-3.52088	-5.79734	-6.66456	-5.29174	-3.62419
37	-0.476557	-1.13456	-13.588	-43.5787	-54.0163	-49.7341	-39.9294	-29.3087		37	0.956199	0.496141	0.175636	-3.52114	-5.80513	-6.3824	-5.38697	-3.35202
37.1	-0.0459159	-1.37227	-12.9585	-43.3252	-54.1817	-49.2783	-40.097	-29.5388		37.1	0.278926	0.598524	-0.262082	-3.51349	-5.4993	-6.61941	-5.45559	-2.9719
37.2	0.151532	-1.55514	-12.9949	-43.9469	-53.9452	-49.1759	-40.0703	-30.212		37.2	0.197953	0.792402	-0.0869761	-3.25243	-5.40681	-6.75659	-5.41357	-2.59789
37.3	0.0703701	-1.55101	-12.9688	-43.8567	-54.0841	-49.0976	-39.9435	-30.0303		37.3	0.47499	0.600813	-0.23571	-3.22288	-5.42922	-6.8047	-5.6568	-2.32697
37.4	-0.105239	-1.13676	-13.0098	-43.6897	-54.0369	-49.0347	-39.9003	-29.9366		37.4	0.522125	0.463801	-0.0648627	-3.44043	-5.80866	-6.65287	-5.45458	-2.50685
37.5	0.00190113	-1.03343	-12.419	-43.9155	-53.9004	-49.101	-40.0983	-29.6623		37.5	0.355506	0.690124	-0.624589	-3.3939	-5.93854	-6.63025	-5.62871	-2.86228
37.6	-0.0936588	-0.888354	-12.0737	-43.7517	-53.9143	-49.0108	-40.5403	-29.8137		37.6	0.325882	0.752904	-0.801778	-3.85141	-6.15468	-6.73462	-5.10051	-2.82794
37.7	-0.0629132	-1.10237	-12.2254	-43.6806	-54.1545	-48.7668	-40.7963	-30.0324		37.7	0.224947	0.826308	-0.5892	-3.96537	-6.04378	-6.62057	-5.09922	-2.64096
37.8	-0.104216	-0.859678	-12.132	-43.5457	-54.0994	-48.8978	-40.8031	-29.829		37.8	0.409283	0.686859	-0.463262	-3.82019	-5.85902	-6.45352	-4.71071	-2.51894
37.9	0.285301	-0.934418	-12.131	-44.254	-54.1859	-49.2938	-41.2779	-29.7685		37.9	0.222516	0.339278	-0.44413	-3.49879	-5.71975	-6.20268	-4.30741	-2.7173
38	0.17137	-1.04853	-12.1735	-44.3963	-54.2076	-49.0331	-41.2131	-30.1529		38	0.263512	0.20793	-0.411242	-3.37792	-5.61991	-6.32178	-4.38795	-2.65281
38.1	-0.346229	-1.31531	-12.3653	-44.6053	-54.058	-48.6305	-40.9093	-30.4317		38.1	0.536347	0.24915	-0.409942	-3.39418	-5.60124	-6.56647	-4.59245	-2.98408
38.2	-0.638505	-1.2299	-12.4978	-44.369	-54.0752	-48.498	-40.5652	-30.3609		38.2	0.663931	0.426004	-0.205394	-3.3655	-5.55467	-6.62083	-4.64872	-2.97286
38.3	-0.41196	-1.43528	-12.6483	-44.5223	-54.082	-48.4007	-40.6901	-29.7435		38.3	0.481562	0.45146	-0.501138	-3.32525	-5.84817	-6.59825	-4.50588	-2.85554
38.4	-0.0627302	-1.50351	-12.3921	-44.2015	-54.1974	-48.7221	-40.5894	-29.6123		38.4	0.413997	0.289319	-0.817624	-3.52148	-5.7444	-6.24951	-4.5101	-2.63566
38.5	-0.267028	-1.29867	-11.9541	-43.9342	-53.7551	-49.1314	-40.539	-28.9595		38.5	0.632555	0.344404	-1.09059	-3.48426	-6.02303	-5.93642	-4.42665	-2.87335
38.6	-0.0620957	-1.6405	-12.134	-43.7176	-53.669	-49.0675	-40.5757	-28.8723		38.6	0.442571	0.683778	-1.08139	-3.49333	-5.8093	-6.45587	-4.14345	-3.03242
38.7	0.0634307	-1.30177	-12.4101	-43.6099	-53.9471	-49.1933	-40.3089	-29.143		38.7	0.507503	0.390276	-0.601488	-3.71867	-5.74306	-6.17699	-4.52273	-3.05635
38.8	-0.390213	-1.55183	-12.601	-43.6002	-54.2891	-49.2562	-40.286	-29.1308		38.8	0.744243	0.490494	-0.313253	-3.54228	-5.58434	-6.23927	-5.18061	-2.89526
38.9	-0.33062	-1.0359	-12.218	-43.55	-54.2507	-49.2502	-40.1748	-29.2581		38.9	0.579251	0.173565	-0.349081	-3.3852	-5.70775	-6.0992	-5.01843	-3.19138
39	-0.220234	-1.10754	-12.3193	-43.5567	-54.3307	-49.484	-40.1331	-29.5614		39	0.356928	0.331755	-0.371866	-3.23513	-5.21736	-5.85245	-4.94748	-3.09651
39.1	-0.103001	-1.29774	-12.4179	-43.245	-54.2002	-49.9124	-40.4772	-29.3673		39.1	0.427155	0.567912	-0.284851	-3.31618	-5.22516	-5.76775	-4.22476	-3.04211
39.2	-0.151356	-1.2851	-12.0499	-43.5029	-54.047	-49.642	-40.0084	-29.1115		39.2	0.602524	0.618556	-0.432115	-3.35702	-5.36332	-5.95543	-4.51575	-3.42164
39.3	-0.0509247	-1.1336	-12.5468	-43.9973	-53.7695	-49.3341	-39.5098	-29.2587		39.3	0.272915	0.499183	0.359263	-3.31097	-5.57015	-6.41823	-4.85348	-3.04455
39.4	0.0160409	-1.35392	-12.5035	-44.1836	-53.4608	-49.3926	-39.6846	-29.2277		39.4	0.214655	0.420278	0.14047	-2.8651	-5.81947	-6.49123	-4.89804	-3.16347
39.5	0.0613445	-1.44803	-12.6025	-44.2816	-53.4583	-49.0128	-39.8015	-29.4643		39.5	0.342422	0.371561	-0.228054	-2.87026	-5.74568	-6.52362	-5.21524	-2.96987
39.6	-0.349662	-1.36406	-12.2507	-44.1965	-53.5756	-48.8174	-40.0411	-29.8823		39.6	0.315474	0.493449	-0.687133	-2.71779	-5.8906	-6.53104	-4.83387	-2.63939
39.7	0.032779	-1.5671	-11.8491	-44.0675	-53.8302	-48.7417	-40.2012	-29.8313		39.7	0.292867	0.58882	-0.990611	-2.83517	-5.52358	-6.6229	-4.95894	-2.79917
39.8	0.0557483	-1.4791	-12.0245	-44.1225	-54.0864	-48.8366	-40.3466	-29.68		39.8	0.35471	0.482979	-0.700542	-3.32848	-5.1343	-6.43292	-4.50427	-2.95477
39.9	-0.0157821	-1.24334	-12.2211	-43.6792	-53.8044	-49.0959	-40.0678	-29.7947		39.9	0.500389	0.230791	-0.533927	-3.77798	-5.2782	-6.20558	-4.74322	-2.52443
40	0.131508	-0.857327	-12.6569	-43.3303	-53.618	-49.2388	-40.3033	-30.0602		40	0.392466	0.0819642	-0.517633	-4.06429	-5.55012	-5.90747	-4.51698	-2.48961
40.1	0.616771	-0.90942	-12.3236	-43.3665	-53.4604	-49.5933	-40.4053	-29.8329		40.1	0.191153	0.0209232	-0.746327	-4.19931	-5.74365	-5.87913	-4.43893	-2.61829
40.2	0.45044	-0.951735	-12.5507	-43.2593	-53.5182	-49.6683	-40.3872	-29.9235		40.2	0.389062	0.281243	-0.966322	-3.99806	-5.95303	-5.49918	-4.35487	-2.54745
40.3	0.0236623	-1.42757	-12.6635	-43.9085	-53.3146	-49.5515	-40.2117	-30.0496		40.3	0.421158	0.53056	-0.829987	-3.64766	-6.16315	-5.36313	-4.42701	-2.47687
40.4	0.314359	-1.24808	-12.4352	-43.9552	-53.0523	-49.7054	-39.9349	-30.2253		40.4	0.0297752	0.502462	-1.19304	-3.80142	-6.53899	-5.71864	-4.811	-2.58036
40.5	-0.0565049	-1.50526	-12.4368	-44.1935	-52.8636	-49.1642	-40.1774	-29.8635		40.5	0.145414	0.719018	-0.886219	-3.81037	-6.69517	-5.86925	-4.7539	-2.9986
40.6	-0.143256	-1.24922	-12.4994	-44.1595	-52.8881	-49.0602	-40.0756	-29.8232		40.6	0.216732	0.226466	-0.826131	-3.56521	-6.55307	-6.26227	-4.77098	-2.88668
40.7	-0.216966	-1.30752	-12.7703	-43.9474	-52.9973	-49.0294	-40.2381	-29.5998		40.7	0.472323	0.780813	-0.641103	-3.56229	-6.08682	-6.12379	-4.77963	-2.69487
40.8	-0.0556526	-1.19772	-12.8899	-44.3903	-53.2574	-48.9376	-40.0427	-29.5177		40.8	0.444034	0.955949	-0.559449	-3.58803	-5.90361	-5.97661	-5.0975	-2.82126
40.9	-0.208154	-0.859503	-12.7378	-44.2268	-53.4528	-49.0906	-39.6591	-29.7583		40.9	0.418708	0.527793	-0.353433	-3.70999	-5.91331	-5.94291	-5.25661	-2.9364
41	-0.434352	-1.08885	-13.1045	-44.4703	-53.2964	-48.7659	-39.6996	-29.7821		41	0.322877	0.463336	-0.30188	-3.58722	-6.30942	-6.01441	-5.21262	-3.17547
41.1	-0.132103	-0.922527	-13.1021	-44.4195	-53.4354	-49.0811	-39.3997	-29.7148		41.1	0.372681	0.247452	-0.0932522	-3.31872	-6.20089	-5.66681	-5.50375	-2.74938
41.2	-0.418583	-1.03527	-13.1704	-44.3997	-53.888	-48.7747	-39.7719	-30.1233		41.2	0.574089	0.653891	-0.237558	-3.05455	-5.82605	-5.85609	-5.07167	-2.43974
41.3	-0.721987	-1.21262	-13.2173	-44.1688	-53.9444	-48.8914	-39.9524	-29.8865		41.3	0.426206	0.682188	-0.324915	-3.08281	-5.9876	-6.06016	-4.46541	-2.52757
41.4	-0.839524	-1.11492	-13.18	-44.0277	-53.8185	-48.4275	-40.0882	-29.7341		41.4	0.692395	0.722683	-0.456828	-3.04941	-5.6335	-6.40719	-4.42448	-2.79078
41.5	-0.808018	-1.0625	-13.1328	-44.1954	-54.0303	-48.6008	-39.9739	-29.6104		41.5	0.438691	0.629067	-0.354035	-3.11786	-5.66303	-6.24825	-4.68447	-2.80591
41.6	-0.324702	-0.957203	-12.8432	-43.7706	-54.0733	-48.5166	-40.0035	-29.5434		41.6	0.44229	0.48913	-0.521374	-2.93344	-5.19602	-6.20636	-4.87834	-2.87352
41.7	-0.214853	-1.28683	-12.42	-44.0603	-53.6684	-48.8681	-39.9075	-28.9291		41.7	0.375554	0.875115	-0.54357	-2.81583	-5.12454	-5.92621	-4.91444	-3.27541
41.8	0.127526	-1.30228	-12.2252	-44.4033	-53.2426	-48.8882	-39.8831	-28.7272		41.8	0.46212	0.630634	-0.763183	-2.96365	-5.42868	-6.20255	-4.79764	-3.46703
41.9	0.417585	-1.20393	-12.261	-44.4672	-53.1015	-48.676	-39.927	-28.6013		41.9	0.499138	0.734227	-0.59107	-2.83912	-5.63928	-6.61159	-4.81464	-3.81369
42	0.438403	-1.19438	-12.7338	-44.3171	-53.1367	-48.9154	-40.2958	-28.5472		42	0.428989	0.697075	-0.52721	-3.12456	-5.81072	-6.32994	-4.4192	-4.21123
42.1	0.203592	-1.08672	-12.6698	-44.1615	-53.0153	-48.9787	-40.0668	-28.9428		42.1	0.573627	0.216109	-0.506824	-2.99087	-5.82031	-6.18776	-4.43255	-4.07356
42.2	-0.0363449	-0.833316	-12.7355	-44.0971	-53.1151	-48.7786	-40.1851	-29.1177		42.2	0.504741	-0.320094	-0.431079	-2.64655	-5.76527	-6.40328	-4.32865	-3.99308
42.3	-0.166153	-1.20076	-12.6535	-43.8893	-52.8844	-48.9947	-40.2304	-29.415		42.3	0.444597	0.0905997	-0.183812	-3.1778	-5.67328	-6.19945	-4.5639	-3.59308
42.4	-0.251203	-1.59206	-13.2786	-44.3244	-52.9086	-49.08	-39.9262	-29.5015		42.4	0.394411	0.371022	0.321037	-3.05959	-5.51644	-6.25123	-4.92219	-3.33181
42.5	0.203103	-1.55813	-13.247	-44.1366	-52.4781	-49.0689	-39.7648	-29.7774		42.5	0.250269	0.545182	0.227771	-3.59094	-5.52402	-6.30501	-5.16538	-2.78018
42.6	0.210194	-1.50765	-13.378	-44.4984	-52.6496	-48.9714	-39.8524	-29.8515		42.6	0.312179	0.672978	0.35782	-3.83452	-5.25735	-6.37166	-4.81176	-2.92364
42.7	0.415282	-1.22836	-13.4211	-44.1775	-52.524	-48.7472	-39.8303	-29.5137		42.7	0.181498	0.755529	-0.0785208	-3.65717	-5.16754	-6.3031	-4.51438	-3.23951
42.8	0.184413	-1.46252	-13.3073	-44.7534	-52.4094	-48.5574	-40.2548	-29.6666		42.8	0.307833	0.939046	-0.110977	-2.85821	-5.34056	-6.60062	-4.70448	-3.37021
42.9	0.00627877	-1.28735	-13.0617	-44.5529	-52.1255	-48.9675	-39.9608	-29.4774		42.9	0.655369	0.964843	-0.384162	-2.66351	-5.47533	-6.17349	-4.84923	-3.60045
43	0.0749137	-1.34094	-12.9767	-44.3455	-52.3995	-48.8441	-39.8853	-29.2464		43	0.59318	1.00474	-0.448461	-2.66797	-5.2148	-5.9357	-4.86078	-3.5235
43.1	0.361751	-1.16961	-13.1143	-44.4543	-52.274	-48.3986	-39.9369	-29.5346		43.1	0.50204	0.55333	-0.371818	-2.3588	-5.35832	-6.28616	-4.78607	-3.3236
43.2	0.474541	-1.50357	-13.1533	-44.4309	-52.7395	-48.2192	-39.7558	-30.0557		43.2	0.263692	0.31904	-0.24958	-2.37212	-5.34208	-6.71074	-4.89982	-3.29736
43.3	0.210229	-1.51007	-13.3266	-44.6166	-52.7949	-48.4681	-39.4439	-30.1036		43.3	0.327617	0.370908	-0.178084	-2.70269	-5.12561	-6.69905	-5.16609	-3.37707
43.4	0.052192	-1.48964	-13.2014	-44.5416	-52.6333	-48.1652	-39.1947	-30.2243		43.4	0.539652	0.426795	-0.198789	-2.69117	-5.35692	-6.4311	-5.45676	-3.18285
43.5	0.149255	-1.72123	-13.0863	-44.3401	-52.5897	-48.3433	-39.776	-30.122		43.5	0.675306	0.67823	-0.290446	-2.78735	-5.23131	-6.3278	-5.20347	-3.18653
43.6	-0.264781	-1.41503	-13.0555	-44.2941	-52.5391	-48.4144	-39.6477	-29.9819		43.6	0.934534	0.619883	-0.621428	-2.81094	-5.02322	-6.57823	-4.99994	-3.38069
43.7	-0.187804	-1.10415	-13.1417	-44.1756	-52.8309	-48.7862	-39.9517	-29.9208		43.7	0.407142	0.564099	-1.00424	-2.94951	-4.81521	-6.22089	-4.7822	-3.44627
43.8	0.141975	-1.06866	-13.3676	-43.7205	-52.9784	-48.6394	-39.7774	-30.32		43.8	0.218791	0.468223	-0.747863	-3.40015	-4.82729	-6.14171	-4.79306	-3.05416
43.9	0.069538	-0.661901	-13.2765	-43.4728	-53.0615	-48.7425	-39.578	-30.6128		43.9	0.378022	0.754674	-0.588274	-3.73318	-5.06411	-6.12483	-4.95429	-2.85181
44	-0.0343208	-0.900634	-13.2424	-43.3151	-52.6968	-48.6099	-39.2235	-30.7884		44	0.533774	0.871614	-0.567768	-3.98127	-5.44476	-6.04754	-5.41591	-3.07408
44.1	-0.121482	-0.839641	-13.3372	-43.2004	-53.1229	-48.8088	-39.3789	-30.8814		44.1	0.438539	0.568811	-0.174645	-3.81801	-5.28265	-6.11631	-5.57755	-3.0881
44.2	-0.294284	-0.774926	-12.9875	-42.8989	-53.0095	-48.7815	-39.5846	-30.9537		44.2	0.286924	0.715047	-0.237667	-3.84863	-5.3645	-6.25266	-5.53237	-2.97995
44.3	-0.416693	-0.506972	-13.0218	-42.593	-53.08	-48.9986	-39.4209	-31.0382		44.3	0.322442	0.403383	-0.203263	-3.79269	-5.33798	-6.21933	-5.34002	-3.1101
44.4	-0.46641	-0.58144	-12.8291	-42.6821	-52.6534	-49.1013	-39.7259	-30.8764		44.4	0.281911	0.374744	-0.271161	-3.28123	-5.26912	-6.20458	-5.26052	-3.34038
44.5	-0.593231	-0.524702	-12.784	-42.8147	-52.6598	-49.259	-39.5639	-30.788		44.5	0.570217	-0.105257	-0.0234665	-3.34906	-5.04396	-6.00851	-5.29982	-2.99991
44.6	-0.195511	-0.689584	-12.591	-42.8717	-52.5871	-49.182	-39.3839	-30.573		44.6	0.239212	0.245185	-0.247758	-3.52869	-4.94293	-6.09769	-5.06862	-3.19241
44.7	-0.145312	-0.637345	-12.4145	-42.9352	-52.4439	-49.0603	-39.5104	-30.5336		44.7	0.383116	0.429224	-0.426222	-3.41186	-5.14195	-6.01107	-5.13771	-3.01255
44.8	0.239838	-0.54501	-12.2937	-42.7885	-52.3863	-49.0978	-39.7021	-30.5495		44.8	0.228791	0.598278	-0.503903	-3.50591	-5.25235	-5.93749	-5.13122	-2.68179
44.9	-0.0534139	-0.486892	-12.1949	-42.9542	-52.2998	-49.2004	-39.5209	-30.1579		44.9	0.307879	0.445451	-0.48821	-3.72016	-5.60922	-5.82612	-5.61609	-2.90201
45	-0.245544	-0.626119	-11.8878	-42.789	-52.3668	-49.3217	-39.6236	-30.5158		45	0.554185	0.495633	-0.44282	-3.84125	-5.73473	-5.75557	-5.519	-2.6246
45.1	-0.0688663	-1.2202	-11.9059	-43.1252	-52.0519	-49.1296	-39.7906	-30.449		45.1	0.437823	0.652236	-0.413822	-3.17718	-6.04304	-6.23794	-5.27272	-2.79165
45.2	-0.322387	-1.23336	-11.8347	-42.9218	-52.4948	-49.1115	-39.7834	-30.4314		45.2	0.655709	0.453196	-0.488783	-3.2594	-5.85758	-5.88835	-5.57827	-2.74703
45.3	-0.36868	-1.17437	-12.0209	-42.6975	-52.6148	-49.3626	-40.0678	-30.7029		45.3	0.937801	0.269522	-0.52327	-3.14733	-5.92266	-5.28581	-5.13036	-2.79223
45.4	-0.492497	-1.18963	-12.2714	-42.6351	-52.4568	-49.9053	-40.0476	-30.6197		45.4	1.16825	0.36028	-0.308617	-3.33734	-6.14206	-5.63863	-5.29877	-2.81033
45.5	-0.501994	-0.765058	-11.9947	-42.4748	-52.8067	-50.0089	-39.525	-30.0406		45.5	1.34822	0.184099	-0.504766	-3.24881	-5.77136	-5.86865	-5.32074	-3.14647
45.6	-0.290815	-0.807447	-12.103	-42.7462	-52.8615	-49.9382	-39.1214	-30.4738		45.6	0.964683	0.593966	-0.226038	-3.21731	-5.52567	-6.06347	-5.55937	-2.76731
45.7	-0.242214	-0.851613	-12.0065	-42.9178	-52.9391	-49.6733	-39.3086	-30.3909		45.7	0.764213	0.370414	-0.285106	-3.14951	-5.57811	-6.07096	-5.6134	-3.23175
45.8	-0.367187	-0.906716	-11.8221	-42.6151	-52.8076	-49.398	-39.4867	-30.6321		45.8	0.806496	0.329567	-0.837334	-3.38005	-5.48063	-6.11961	-5.85236	-2.7885
45.9	-0.694247	-1.27758	-11.7143	-42.5438	-52.4263	-49.3802	-39.6195	-30.9337		45.9	1.01761	0.282241	-1.05377	-3.28186	-5.83537	-5.86442	-5.82887	-2.88709
46	-0.68026	-1.031	-11.8917	-42.4953	-52.5154	-49.4264	-39.4756	-30.9375		46	1.10708	0.387649	-0.791222	-3.35415	-5.73872	-5.79183	-5.40422	-3.04354
46.1	-0.85478	-1.34141	-11.7519	-42.2489	-52.2269	-49.131	-39.4871	-30.7609		46.1	1.22038	0.427557	-0.954224	-3.17395	-5.7714	-5.61046	-5.35111	-2.96693
46.2	-0.65387	-1.28287	-11.6874	-42.4042	-51.9711	-49.0898	-39.1732	-30.2799		46.2	0.866441	0.269602	-1.04159	-2.99114	-5.65772	-5.71311	-5.50262	-3.11138
46.3	-0.765489	-1.36942	-11.869	-42.1806	-52.0308	-48.9467	-39.0646	-30.0325		46.3	0.747817	0.463798	-0.808688	-3.56211	-5.78143	-5.67766	-5.58616	-3.32928
46.4	-0.859788	-1.29883	-12.0499	-42.2876	-52.4221	-48.9289	-38.9401	-30.2623		46.4	0.658456	0.1655	-0.637943	-3.64763	-5.92853	-5.71566	-5.64465	-3.30563
46.5	-0.715115	-1.05033	-12.3261	-42.3564	-52.686	-48.9141	-39.1531	-30.4164		46.5	0.711518	0.0221604	-0.340661	-3.46244	-5.85108	-5.52925	-5.54345	-3.36406
46.6	-0.522015	-0.77613	-11.9733	-41.9063	-52.6861	-48.993	-39.2413	-30.5448		46.6	0.699624	-0.141207	-0.443185	-3.55365	-5.96989	-5.22832	-5.92318	-3.19746
46.7	0.218121	-0.884186	-11.7948	-42.1283	-52.6023	-48.6945	-39.5205	-30.7014		46.7	0.371093	0.130011	-0.64544	-3.4513	-6.05361	-5.46878	-5.31561	-2.79209
46.8	0.317816	-1.10205	-11.7666	-42.1001	-52.2346	-48.477	-39.3613	-30.3469		46.8	0.428949	0.161649	-0.518775	-3.4735	-6.03051	-6.06478	-5.61179	-3.28776
46.9	0.197651	-0.747883	-11.8578	-42.5069	-52.0556	-48.9172	-39.3755	-30.5808		46.9	0.401065	0.12583	-0.23786	-3.14963	-6.34022	-6.1611	-5.24894	-3.31964
47	0.220096	-0.970015	-11.7865	-42.562	-51.7689	-49.0623	-39.3101	-30.1589		47	0.416283	0.570108	-0.490621	-3.07063	-6.03595	-6.24999	-4.8204	-3.60695
47.1	0.273744	-1.09789	-11.8267	-42.662	-51.5539	-48.8837	-39.2388	-30.1881		47.1	0.378491	0.446909	-0.601035	-3.04579	-5.93534	-5.98051	-4.77959	-3.82192
47.2	0.160376	-1.27457	-12.1788	-43.0178	-51.726	-49.0232	-39.258	-30.1799		47.2	0.488155	0.576884	-0.671864	-2.68135	-5.78047	-5.92669	-4.35887	-3.58267
47.3	0.35636	-1.23936	-12.1394	-43.0964	-52.0405	-49.3548	-39.1806	-30.1046		47.3	-0.0304017	0.535567	-0.550165	-2.40142	-5.47778	-5.62368	-4.27993	-3.4891
47.4	-0.098653	-0.948879	-12.4017	-43.2257	-51.9948	-49.4095	-39.3537	-30.0744		47.4	0.044765	0.358783	-0.153717	-2.55359	-5.48868	-5.48852	-4.17661	-3.45785
47.5	-0.152073	-0.851761	-12.3669	-43.1859	-52.2606	-49.2628	-39.6963	-30.261		47.5	0.0936001	0.449181	0.0455101	-2.50646	-5.6841	-5.42016	-4.27531	-3.21246
47.6	-0.0745443	-0.866654	-12.3721	-42.9148	-52.3458	-49.1944	-39.744	-30.0292		47.6	0.216675	0.254801	0.162772	-3.22504	-5.68177	-5.50053	-4.17537	-3.23002
47.7	-0.515524	-0.604631	-12.5798	-42.6868	-52.3479	-49.2638	-39.8491	-29.9277		47.7	0.662011	0.458136	0.139872	-3.6926	-5.70697	-5.75367	-4.03692	-3.18616
47.8	-0.662792	-0.932257	-12.6834	-42.6227	-51.9723	-49.1996	-39.6229	-29.6626		47.8	0.773969	0.590356	0.0987453	-3.64704	-5.46774	-5.75483	-4.45251	-3.34502
47.9	-0.627048	-1.03416	-12.6935	-42.8117	-51.9259	-49.1464	-39.9138	-29.7969		47.9	0.795965	0.668716	0.123579	-3.55702	-5.72925	-5.91862	-4.40102	-3.27857
48	-0.364986	-1.0424	-12.8306	-42.992	-51.8074	-49.0706	-40.0209	-29.7779		48	0.660952	0.551944	0.0573124	-3.57172	-5.56311	-5.98901	-4.34332	-3.08707
48.1	-0.137599	-1.44287	-12.5727	-42.9246	-51.8095	-48.7328	-40.0879	-29.6406		48.1	0.51262	0.607299	-0.165641	-3.61553	-5.4834	-6.14948	-4.41079	-3.15644
48.2	-0.155956	-1.6712	-12.5589	-43.0093	-51.9091	-48.4192	-39.9608	-30.0174		48.2	0.599669	0.784344	-0.49172	-3.55283	-5.37046	-5.9557	-4.49235	-2.98459
48.3	-0.427256	-1.46212	-12.4605	-43.0919	-52.5984	-48.4112	-39.5491	-29.9552		48.3	0.457527	0.818266	-0.733066	-3.48275	-5.1679	-5.86731	-4.67144	-3.07503
48.4	-0.201796	-1.88807	-12.5909	-42.7913	-52.6725	-48.4654	-39.4317	-29.5819		48.4	0.166641	0.984064	-0.800317	-3.47137	-5.42291	-5.81445	-4.88363	-3.03984
48.5	-0.257768	-1.51527	-12.3969	-42.5626	-52.5866	-48.4999	-39.282	-29.5246		48.5	0.432539	0.922666	-0.89106	-3.23892	-5.6509	-5.99319	-4.964	-3.1776
48.6	0.0307807	-1.73837	-12.4777	-42.5033	-52.7785	-48.4906	-39.0206	-29.67		48.6	-0.160918	0.980214	-0.301644	-3.17812	-5.79727	-6.24749	-5.08347	-3.14875
48.7	0.373701	-1.63346	-12.5836	-42.503	-52.9198	-48.7864	-39.0064	-29.9715		48.7	-0.129193	0.626308	-0.0200569	-3.37154	-5.61185	-6.19332	-5.0159	-3.17604
48.8	0.570535	-1.54555	-12.7461	-42.566	-52.8582	-48.7759	-38.9425	-29.7304		48.8	0.0916443	0.325275	-0.218869	-3.56928	-5.66499	-6.00925	-5.04904	-3.48521
48.9	0.352714	-1.17982	-12.5449	-42.4332	-52.6989	-48.4547	-39.6038	-29.986		48.9	0.332535	0.033933	-0.687104	-3.75207	-5.33905	-6.1847	-4.8699	-3.43741
49	0.248192	-1.28987	-13.0756	-42.502	-52.6457	-48.2824	-39.2259	-29.6069		49	0.339447	0.354583	-0.13111	-3.76026	-5.21931	-5.92278	-5.07996	-3.76764
49.1	0.233202	-1.19413	-12.95	-42.6534	-52.6855	-47.6382	-39.2126	-29.7688		49.1	0.638838	0.38576	0.0664073	-3.50244	-5.06175	-6.21681	-5.08021	-3.7407
49.2	0.00282219	-1.5746	-12.6868	-42.4665	-52.7147	-47.8891	-39.1932	-29.6644		49.2	0.895398	0.744525	0.14103	-3.43252	-5.02964	-6.15699	-4.89375	-3.49084
49.3	-0.238275	-1.93298	-12.7664	-42.8871	-52.6179	-47.9962	-39.7183	-29.3833		49.3	1.18188	0.92787	0.195677	-3.31784	-5.04114	-6.18021	-4.7437	-3.67164
49.4	-0.510153	-1.48411	-12.8467	-42.8226	-51.9805	-48.3711	-39.4138	-29.6774		49.4	1.46504	0.61562	0.374554	-3.46546	-5.50179	-6.27427	-4.775	-3.45387
49.5	-0.326044	-1.35813	-12.7002	-42.912	-51.7311	-48.7692	-39.4177	-30.0388		49.5	1.00395	0.585067	0.0858418	-3.52004	-5.92953	-6.03566	-5.04985	-3.39557
49.6	-0.0603316	-1.0295	-12.7972	-42.882	-51.4668	-48.8356	-39.1934	-29.5414		49.6	0.716123	0.455394	-0.232471	-3.4924	-5.90104	-6.15794	-5.19421	-3.57794
49.7	0.169654	-1.23023	-12.56	-43.1318	-51.8373	-48.6266	-39.0191	-29.4269		49.7	0.232853	0.609876	-0.422024	-3.26125	-5.69804	-6.09018	-5.44727	-3.67031
49.8	-0.0346095	-1.33789	-12.4466	-42.7203	-51.8906	-48.4785	-39.2254	-29.3147		49.8	0.200872	0.164444	-0.574943	-3.41218	-5.6431	-6.17228	-5.28939	-3.84713
49.9	-0.0639794	-1.29905	-12.1809	-43.2879	-51.6931	-48.7044	-39.4226	-29.5995		49.9	0.24488	0.141542	-0.795521	-2.87645	-5.68807	-6.10796	-5.13453	-3.50969
50	-0.185478	-1.74147	-12.6207	-43.1412	-51.6777	-48.6575	-39.5444	-29.7063		50	0.453306	0.41607	-0.714517	-2.84737	-5.35285	-5.8848	-5.01513	-3.50559
50.1	-0.102547	-1.52001	-12.6148	-42.9733	-51.1494	-48.5661	-39.2544	-29.422		50.1	0.356081	0.451754	-0.697939	-3.12546	-5.81651	-5.96955	-5.13503	-3.45742
50.2	0.0934948	-1.39796	-12.5463	-42.6572	-50.9287	-49.0668	-39.1052	-29.3211		50.2	0.281725	0.532612	-0.718925	-3.05821	-5.83939	-5.78148	-4.87629	-3.78864
50.3	0.163155	-1.33566	-12.4792	-42.1241	-50.8847	-48.685	-39.3059	-29.2667		50.3	0.300916	0.411856	-0.570746	-3.30063	-5.76738	-5.94059	-4.77497	-3.62636
50.4	-0.31077	-1.0225	-12.4181	-42.7236	-50.4818	-48.3972	-39.4847	-29.4255		50.4	0.204296	0.0793786	-0.498668	-2.84736	-6.27821	-6.36272	-4.8823	-3.73241
50.5	-0.144981	-0.827006	-12.0966	-42.7761	-50.7455	-48.3842	-39.4796	-29.3493		50.5	0.303492	-0.130287	-0.731727	-3.00798	-5.94689	-6.63336	-4.96755	-4.03734
50.6	-0.262373	-0.621592	-12.1885	-42.6729	-51.2662	-48.5253	-39.3084	-29.1218		50.6	0.259852	-0.129544	-0.413227	-3.25938	-5.8305	-6.43265	-5.40612	-4.53181
50.7	-0.421298	-0.492765	-11.9555	-43.0015	-51.7086	-48.2824	-39.5071	-29.4121		50.7	0.288823	-0.188545	-0.635102	-3.05944	-5.74395	-6.43469	-5.43393	-4.49747
50.8	-0.324629	-0.626335	-12.2176	-43.2867	-51.5823	-48.4426	-39.5519	-29.2204		50.8	0.419408	0.153422	-0.579058	-2.92278	-5.56994	-5.93546	-5.16596	-4.52161
50.9	-0.14201	-0.890506	-12.1984	-43.2044	-51.765	-48.4833	-39.8748	-29.1095		50.9	0.378442	0.236573	-0.590968	-2.84462	-5.3582	-5.6711	-5.33714	-4.24385
51	-0.0930363	-1.10528	-12.0851	-42.8066	-52.0468	-48.2861	-40.1792	-29.2814		51	0.788399	0.571655	-0.607139	-3.18313	-5.02323	-6.07205	-5.28402	-4.03834
51.1	0.0959109	-0.973746	-12.2466	-42.7638	-51.8308	-48.7438	-40.1502	-29.5437		51.1	1.0337	0.399012	-0.351975	-3.01495	-5.18353	-5.68702	-5.56653	-3.63946
51.2	-0.231255	-0.94898	-12.2069	-42.3097	-51.7998	-48.6112	-40.3585	-29.6417		51.2	1.32512	0.45515	-0.476545	-3.17109	-5.24385	-5.22198	-5.35595	-3.71574
51.3	-0.490447	-0.567138	-12.2097	-42.6029	-51.5047	-48.8471	-40.0004	-29.6817		51.3	1.26813	0.382303	-0.507426	-2.91443	-5.21825	-5.62542	-5.48571	-3.76125
51.4	-0.445329	-0.244813	-12.3675	-42.8833	-51.5987	-48.6751	-39.7784	-29.5887		51.4	0.86885	-0.0458174	-0.464619	-3.02826	-5.17891	-5.96732	-5.49108	-3.79595
51.5	0.0807085	-0.238209	-12.2508	-42.6689	-51.3204	-48.898	-39.7513	-29.5132		51.5	0.586042	-0.162154	-0.281052	-3.57066	-5.7039	-6.12542	-5.80362	-3.69936
51.6	0.216351	-0.395306	-11.7373	-42.8923	-51.4183	-49.0846	-39.8615	-29.7918		51.6	0.747071	0.075073	-0.488194	-3.64351	-5.33827	-5.86016	-5.12697	-3.5602
51.7	0.476657	-0.348026	-11.7899	-42.6837	-51.9337	-49.249	-40.1095	-30.0497		51.7	0.447315	0.169881	-0.472023	-3.45582	-5.39879	-5.81934	-4.9491	-3.05742
51.8	0.235264	-0.695229	-11.7428	-42.6307	-52.3775	-49.2542	-39.8	-30.3209		51.8	0.601255	0.521979	-0.580122	-3.39521	-5.10142	-5.84265	-5.08332	-2.79465
51.9	0.0481605	-1.07787	-11.8331	-42.4537	-52.0712	-49.7441	-39.6639	-30.1917		51.9	0.543337	0.851857	-0.923671	-3.40546	-5.35975	-5.62596	-5.16475	-3.11858
52	0.0464997	-1.02782	-12.1151	-42.4869	-52.2288	-49.4405	-39.7315	-29.7541		52	0.477935	0.896577	-0.458894	-3.60059	-4.8427	-5.86482	-5.0486	-3.28713
52.1	0.165027	-1.42079	-11.9684	-42.2345	-52.5926	-49.0601	-39.4093	-29.7735		52.1	0.448699	0.954282	-0.481179	-3.83094	-4.69696	-5.75303	-5.13087	-3.45312
52.2	0.0623133	-1.53768	-12.0314	-41.9636	-52.3771	-48.8248	-39.5068	-30.124		52.2	0.691238	0.670406	-0.249024	-4.05217	-4.82669	-5.9996	-4.88792	-2.59519
52.3	-0.227348	-1.922	-12.0879	-41.9288	-52.4692	-48.622	-38.7738	-29.7954		52.3	0.955936	0.838744	-0.577921	-4.1075	-5.09855	-6.04452	-5.21046	-2.89804
52.4	-0.344325	-2.00345	-12.0766	-41.7076	-52.3509	-48.6847	-38.3257	-29.8457		52.4	0.803978	0.81838	-0.727229	-4.00976	-5.37031	-6.09673	-5.24672	-2.90691
52.5	-0.408602	-1.9081	-11.9509	-41.8553	-52.1901	-48.4812	-38.5807	-29.7839		52.5	0.654718	1.05553	-0.952618	-3.44589	-5.59272	-6.37366	-5.38177	-3.17617
52.6	-0.365982	-1.4832	-12.0939	-41.9794	-52.3759	-48.4348	-38.1512	-29.4534		52.6	0.729945	0.540129	-0.621916	-3.4567	-5.51902	-6.34776	-5.4715	-3.62924
52.7	-0.656475	-1.65056	-12.1121	-42.011	-52.4147	-48.4591	-38.3056	-29.4963		52.7	0.95537	0.748067	-0.242618	-3.47366	-5.63386	-6.35338	-5.55364	-4.15948
52.8	-0.744436	-1.31468	-12.3521	-42.3953	-52.1522	-48.2956	-38.3332	-29.7439		52.8	1.17846	0.747737	-0.0757974	-3.3236	-5.97711	-6.26485	-5.52069	-3.93671
52.9	-0.569178	-1.5113	-12.66	-42.206	-51.8445	-48.6561	-38.4453	-29.9739		52.9	0.802183	1.11531	0.109131	-3.7368	-6.01445	-5.61425	-5.6147	-3.50492
53	-0.365014	-1.75424	-12.4748	-42.4645	-51.8069	-48.8262	-38.6365	-30.2039		53	0.661045	1.34569	-0.0475123	-3.88116	-5.75424	-5.24753	-5.39894	-3.43094
53.1	-0.431065	-1.79463	-12.3785	-42.5481	-51.7781	-48.9366	-38.6823	-29.9824		53.1	0.887832	1.31319	-0.286375	-3.75554	-5.83987	-5.16566	-5.18302	-3.31346
53.2	-0.241142	-1.76972	-12.7759	-42.4348	-51.781	-48.8828	-38.8156	-30.0866		53.2	0.772504	1.23032	0.070525	-3.72794	-6.08169	-5.29572	-5.16213	-3.61619
53.3	-0.292986	-1.93077	-12.8094	-42.4686	-51.821	-49.0134	-38.8671	-30.3848		53.3	0.922399	1.1839	-0.140854	-3.89203	-6.2672	-5.41233	-5.04447	-3.37668
53.4	-0.471974	-1.69928	-13.2167	-42.6438	-51.6126	-48.9976	-39.0455	-30.1621		53.4	0.75496	1.00824	-0.228441	-3.73377	-6.24317	-5.83603	-5.18958	-3.4351
53.5	-0.558061	-1.75808	-12.9594	-42.5649	-51.6474	-48.9907	-39.2108	-30.0138		53.5	0.657737	1.24274	-0.101434	-3.53333	-5.69645	-6.13134	-5.28536	-3.5283
53.6	-0.328015	-1.72954	-12.8285	-42.9843	-51.4888	-48.9153	-39.0568	-30.1394		53.6	0.6701	0.805799	-0.213144	-3.15133	-5.77385	-5.99381	-5.33145	-3.3815
53.7	-0.360505	-1.91727	-12.4766	-43.3445	-51.3573	-48.9912	-39.0478	-30.6207		53.7	0.590138	0.952954	-0.42331	-3.29271	-5.83712	-5.95312	-5.42244	-2.97283
53.8	-0.213584	-1.46465	-12.3674	-43.718	-51.5696	-48.6169	-39.0527	-30.9836		53.8	0.500207	0.69452	-0.412359	-3.01574	-5.52549	-6.32949	-5.61285	-2.70816
53.9	-0.081791	-1.19607	-12.3911	-43.6275	-51.99	-48.4505	-39.2117	-30.9356		53.9	0.394249	0.621686	-0.426037	-2.71877	-5.18076	-6.10596	-5.67424	-2.6041
54	-0.436246	-1.04716	-12.0372	-43.816	-51.8793	-48.3779	-39.0021	-30.6018		54	0.301915	0.583433	-0.37869	-2.4324	-5.26022	-5.83083	-5.64355	-2.93033
54.1	-0.49447	-1.12347	-11.6447	-43.7463	-51.9638	-48.1709	-39.0977	-30.7149		54.1	0.355155	0.672589	-0.215568	-2.68077	-5.52257	-5.87755	-5.66008	-2.72737
54.2	-0.145773	-1.14997	-11.8925	-43.5259	-52.2837	-47.9521	-39.1315	-30.5808		54.2	0.150431	0.625179	-0.173971	-2.83734	-5.39919	-6.00342	-5.21829	-2.87597
54.3	-0.20656	-1.50016	-12.0275	-43.2355	-52.1833	-47.9441	-39.3851	-30.5642		54.3	0.451608	1.07176	-0.163821	-3.05143	-5.77916	-6.07325	-5.14877	-2.71398
54.4	-0.0701686	-1.47944	-12.2418	-43.0032	-51.9567	-47.8383	-38.9964	-30.4315		54.4	0.753735	0.87183	-0.271858	-3.15173	-5.93867	-6.37522	-5.32853	-2.73736
54.5	0.409324	-1.15588	-11.9461	-42.7808	-51.5545	-47.7631	-39.1281	-30.314		54.5	0.71492	0.74984	-0.34994	-3.10674	-6.02809	-6.52926	-4.80734	-3.41762
54.6	0.426749	-0.76102	-11.748	-42.9023	-51.6447	-47.8601	-39.2331	-30.2566		54.6	0.953875	0.584343	-0.73329	-3.33046	-5.68646	-6.40634	-4.74846	-3.23543
54.7	0.501119	-0.592962	-11.578	-42.5394	-51.3154	-47.761	-39.1594	-30.0372		54.7	0.704257	0.444008	-0.848257	-3.40486	-5.83593	-6.57511	-4.52786	-3.36784
54.8	0.278695	-0.259501	-11.6466	-42.5495	-51.7445	-47.5457	-38.9577	-29.989		54.8	0.877162	0.278047	-0.752956	-3.33384	-5.64906	-6.84087	-4.84556	-3.51042
54.9	0.045398	-0.296546	-11.6914	-42.618	-52.0247	-47.9941	-39.22	-30.0351		54.9	0.985042	0.338778	-0.737071	-3.13965	-5.74089	-6.45057	-4.86362	-3.37928
55	-0.028246	-0.422079	-11.6805	-42.4773	-52.1345	-47.5037	-39.2155	-30.3204		55	0.892917	0.176465	-0.532007	-3.24339	-5.60773	-6.96296	-5.22988	-3.38864
55.1	-0.0338888	-0.51552	-11.7253	-42.245	-51.6157	-47.7425	-39.487	-30.1462		55.1	0.654711	0.156002	-0.425226	-3.0118	-5.65927	-6.76537	-5.13407	-3.41057
55.2	0.25122	-0.836711	-12.0986	-42.276	-51.8329	-48.1937	-39.7956	-30.3306		55.2	0.240227	0.33949	-0.411497	-2.99807	-5.51223	-6.22384	-5.36004	-3.04582
55.3	0.299884	-1.0504	-12.0768	-42.131	-51.7126	-48.3357	-39.8003	-30.305		55.3	0.0335452	0.133812	-0.636987	-2.68401	-5.57479	-6.06266	-5.23279	-3.10347
55.4	0.323309	-1.03423	-12.4448	-42.0897	-51.7715	-48.5883	-39.4389	-30.2764		55.4	0.295816	0.0793788	-0.289366	-2.53319	-5.57876	-5.69922	-5.25159	-3.26007
55.5	-0.076092	-0.938628	-12.1004	-41.8917	-51.5948	-48.2948	-39.395	-30.1354		55.5	0.673863	0.195321	-0.502592	-2.86724	-5.73883	-5.89562	-5.20998	-3.64409
55.6	-0.345247	-0.903882	-11.9855	-42.0381	-52.1244	-48.1865	-39.9493	-29.8028		55.6	0.809521	0.261787	-0.548715	-3.12942	-5.51095	-5.94119	-4.84132	-3.79497
55.7	-0.336274	-0.885518	-12.2847	-42.1587	-52.3189	-48.3551	-39.6957	-29.3453		55.7	0.696652	0.102579	-0.503708	-3.16765	-5.47314	-5.88623	-4.98589	-4.05454
55.8	-0.274197	-0.725804	-12.2408	-42.3179	-52.196	-48.5349	-39.3247	-29.3064		55.8	0.337844	0.0558108	-0.477034	-3.27361	-5.51931	-6.00699	-5.04875	-4.25464
55.9	-0.0637856	-0.675124	-12.3158	-42.7259	-52.5061	-48.4546	-39.4074	-29.6129		55.9	0.189359	0.168012	-0.280585	-2.93354	-5.3673	-6.02885	-4.81943	-4.28645
56	-0.134577	-0.784182	-12.3475	-42.8384	-52.2641	-48.5526	-39.0583	-29.3419		56	0.509348	-0.0359793	-0.201749	-2.90494	-5.38924	-6.15931	-4.85975	-4.33647
56.1	-0.334581	-1.3178	-12.3017	-42.9601	-52.1658	-48.7116	-39.0858	-29.4969		56.1	0.761573	0.225001	-0.171412	-2.5846	-5.24656	-6.27244	-4.69999	-4.21823
56.2	-0.165329	-0.914537	-12.6658	-42.6611	-52.1056	-48.7076	-38.6891	-29.3826		56.2	0.879971	-0.125632	0.124508	-2.91049	-5.34303	-6.15693	-5.10665	-3.94434
56.3	-0.386052	-0.87324	-12.5491	-42.665	-51.9338	-48.5729	-38.3217	-29.3748		56.3	0.805306	-0.0332554	0.226846	-2.96703	-5.4898	-6.15765	-5.36852	-3.88055
56.4	-0.329962	-1.037	-12.1144	-42.5348	-51.9524	-48.5559	-38.386	-29.2293		56.4	0.684558	0.290958	-0.112749	-3.27571	-5.61543	-6.4175	-5.17079	-4.15104
56.5	-0.0540889	-0.729667	-11.7834	-42.5965	-52.0322	-48.5869	-38.4757	-29.73		56.5	0.891751	0.0885537	-0.0577499	-3.39961	-5.34707	-6.3179	-5.20678	-3.70316
56.6	-0.0868042	-0.876902	-11.8782	-42.8991	-52.3968	-48.7083	-38.7843	-29.7354		56.6	0.789598	0.155855	0.00177982	-3.17602	-5.16237	-6.23564	-5.04192	-3.68155
56.7	0.0246928	-0.803098	-11.7596	-42.7707	-52.316	-48.9927	-39.4497	-30.1372		56.7	0.556126	-0.0294284	0.0397876	-3.04609	-5.29413	-6.24824	-4.79045	-3.6446
56.8	-0.288544	-0.589329	-11.8295	-42.8016	-51.9733	-48.5355	-39.4065	-30.3533		56.8	0.660112	-0.214479	0.315221	-3.03839	-5.34947	-6.3413	-5.14037	-3.76139
56.9	-0.261358	-0.535042	-12.0818	-42.4961	-52.018	-48.3013	-39.8443	-30.2881		56.9	1.00564	-0.0917756	0.512038	-3.29165	-5.01938	-6.13927	-4.92001	-3.77529
57	-0.537667	-0.507498	-12.4907	-42.3524	-51.7883	-47.9713	-39.5969	-30.2473		57	1.01383	-0.194941	0.406119	-3.3909	-4.81524	-5.668	-5.28655	-3.77919
57.1	-0.574154	-0.316137	-12.9885	-42.3421	-51.401	-47.9624	-39.8799	-30.5246		57.1	0.982735	0.0266043	0.266938	-3.10971	-5.06192	-5.83416	-5.11778	-3.30115
57.2	-0.298201	-0.790025	-12.8637	-42.1862	-51.7629	-47.9624	-39.7768	-30.5135		57.2	0.743176	0.20038	0.091477	-3.55379	-4.98969	-5.63127	-4.68465	-3.24956
57.3	-0.211986	-0.917218	-12.754	-42.2546	-51.3763	-47.9592	-39.6691	-30.5342		57.3	0.690238	0.3557	-0.173989	-3.56249	-5.03127	-5.92943	-4.8288	-3.35277
57.4	0.0153457	-0.980438	-12.8935	-42.4155	-51.464	-47.4415	-39.6673	-30.6168		57.4	0.35602	-0.121617	-0.328986	-3.24429	-5.06722	-6.55935	-4.56414	-3.35452
57.5	-0.155604	-0.967798	-12.4757	-42.4692	-51.3616	-47.6403	-39.2336	-30.5716		57.5	0.297943	0.0127866	-0.700686	-3.00254	-5.23277	-6.28795	-4.55169	-3.81272
57.6	0.252862	-1.24221	-12.3558	-42.2037	-51.5774	-47.817	-39.0212	-30.5683		57.6	0.0450487	0.628778	-0.365041	-3.10138	-5.33606	-5.99053	-4.94022	-4.18494
57.7	-0.266806	-1.36788	-12.3848	-42.4018	-51.7871	-47.6094	-39.1625	-30.7383		57.7	0.502482	0.737066	-0.57897	-2.88279	-5.11908	-6.04687	-4.89729	-4.08665
57.8	-0.216254	-1.37796	-12.4654	-42.1578	-51.7273	-47.6355	-39.0721	-30.6617		57.8	0.5734	0.795117	-0.23911	-3.0925	-5.33219	-6.14104	-4.81982	-3.88861
57.9	0.179786	-1.0124	-12.2969	-42.3586	-51.5256	-47.7011	-39.3029	-30.4399		57.9	0.515502	0.674135	-0.595154	-2.97536	-5.10387	-5.96828	-4.84763	-3.65071
58	0.11424	-1.07497	-12.3394	-42.0019	-51.7047	-47.8767	-39.3906	-30.2783		58	0.508747	0.890045	-0.506359	-3.4793	-4.98597	-5.70552	-4.84604	-3.63598
58.1	-0.168055	-1.07804	-11.8273	-42.418	-51.7701	-48.1529	-38.9425	-30.3318		58.1	0.680473	0.554864	-0.57371	-3.04516	-4.90804	-5.49994	-4.86266	-3.53662
58.2	-0.0739395	-0.837077	-11.5948	-42.0666	-51.8461	-48.454	-38.8953	-30.5551		58.2	0.608859	0.630731	-0.818333	-3.09242	-5.25311	-5.51029	-5.13231	-3.52064
58.3	0.057626	-0.972224	-11.7329	-42.2498	-51.8827	-48.2848	-38.5897	-30.1125		58.3	0.453477	0.878097	-0.704037	-3.30785	-5.19217	-5.73124	-5.44864	-3.53381
58.4	0.0240085	-1.17242	-11.7147	-42.287	-51.809	-48.3121	-38.7084	-30.1289		58.4	0.200846	0.929451	-0.399859	-3.13736	-5.42572	-6.03177	-5.03643	-3.51254
58.5	0.191709	-0.983768	-11.7293	-42.229	-51.9555	-48.45	-38.871	-30.1754		58.5	0.0221656	0.788196	-0.151564	-3.26506	-5.36419	-6.16738	-4.53903	-3.42924
58.6	0.283509	-1.53322	-12.0865	-42.3969	-51.5844	-48.4538	-39.0809	-30.2125		58.6	0.0874306	0.885437	0.143919	-3.09	-5.33266	-6.20675	-4.27678	-3.6623
58.7	-0.168054	-1.16195	-12.2535	-42.5419	-51.8901	-48.2159	-38.9071	-29.8362		58.7	0.262222	0.472174	0.000159699	-3.23975	-5.21324	-6.37755	-4.42958	-3.83942
58.8	-0.36218	-1.05841	-12.4262	-42.7141	-51.4459	-47.6705	-39.1532	-29.8853		58.8	0.428921	0.333025	-0.0838746	-3.26725	-5.18556	-6.51744	-4.70264	-3.72573
58.9	-0.461123	-1.17027	-12.0821	-42.9312	-50.9112	-47.5812	-39.5597	-29.8484		58.9	0.506457	0.180678	-0.368425	-3.26725	-5.4697	-6.72596	-4.68019	-3.45574
59	-0.705231	-1.34889	-12.0835	-43.3342	-50.9348	-47.5185	-39.5667	-29.2276		59	0.869931	0.117386	-0.197321	-3.09492	-5.72455	-6.15267	-4.57329	-3.47807
59.1	-0.888893	-0.995106	-12.23	-43.1176	-50.7146	-47.1882	-39.6786	-29.4945		59.1	0.866554	0.0274382	-0.505191	-3.02694	-5.62686	-6.21208	-4.44648	-3.19533
59.2	-0.812677	-0.674368	-12.2334	-43.2318	-50.7224	-47.618	-39.9618	-29.3369		59.2	0.782788	0.123077	-0.484304	-2.88716	-5.49106	-6.10386	-4.47501	-3.18114
59.3	-0.348707	-0.84093	-12.0116	-43.3329	-51.0041	-47.8821	-40.1106	-29.3579		59.3	0.246445	0.268663	-0.729569	-3.13697	-5.27697	-6.03706	-4.82401	-3.29421
59.4	-0.203742	-0.731313	-11.9409	-43.344	-51.0099	-48.2042	-40.113	-29.3473		59.4	0.0807656	0.165756	-0.884784	-3.25829	-5.45942	-5.56908	-4.87644	-3.12274
59.5	-0.14108	-0.577996	-12.4535	-43.3299	-51.1439	-48.0543	-39.6785	-29.6357		59.5	-0.0203529	0.0154819	-0.696023	-3.76279	-5.44859	-5.66015	-5.00727	-3.07578
59.6	0.389708	-0.886825	-12.4564	-43.1136	-51.3763	-48.2433	-39.8854	-29.6308		59.6	0.0959967	0.325039	-0.586761	-3.93208	-5.37942	-5.62357	-5.24052	-3.42406
59.7	0.00866166	-0.694737	-12.7913	-43.0106	-51.2729	-47.9165	-39.7444	-29.8084		59.7	0.565056	0.235829	-0.364687	-3.88719	-5.39173	-5.67057	-5.11595	-3.66484
59.8	-0.105002	-0.976869	-12.6498	-43.0603	-51.0885	-47.6485	-39.5895	-29.6412		59.8	0.351802	0.385715	-0.291387	-3.89957	-5.56786	-5.69556	-5.28944	-3.89231
59.9	-0.278815	-0.9345	-12.7663	-43.14	-51.2448	-47.6204	-39.6777	-29.8763		59.9	0.202123	0.254146	-0.240028	-3.95569	-5.41444	-5.87266	-5.15626	-3.62688
60	-0.164037	-0.880602	-12.6836	-43.4298	-51.8256	-47.2986	-40.1337	-30.0233		60	0.213139	0.156789	-0.0012169	-3.44422	-5.30281	-6.02898	-4.81639	-3.21583
60.1	-0.021026	-1.0788	-13.1809	-43.2029	-52.0359	-47.1226	-39.7551	-29.8874		60.1	0.276767	0.511856	0.216225	-3.60358	-5.30973	-6.19714	-4.93242	-3.16811
60.2	-0.251926	-1.15044	-13.5123	-42.9496	-51.8091	-47.0516	-39.6124	-30.0338		60.2	0.514203	0.554179	0.352001	-3.58324	-5.48952	-6.40169	-5.05229	-3.15429
60.3	-0.131597	-0.748166	-13.4223	-42.8776	-51.1504	-47.5217	-39.411	-30.0953		60.3	0.355488	0.118148	0.301356	-3.2781	-5.8713	-6.06539	-4.91981	-3.24861
60.4	0.0254383	-0.732653	-13.0871	-42.8015	-51.1338	-47.4427	-39.3708	-30.309		60.4	0.289859	0.303213	0.128439	-3.23302	-6.17426	-6.12617	-4.81053	-3.27163
60.5	-0.130052	-1.11547	-13.164	-42.937	-50.7569	-47.2513	-39.2743	-30.3865		60.5	0.515598	0.520476	0.00473792	-3.13726	-6.06819	-6.1058	-4.88991	-3.42753
60.6	-0.293621	-1.23597	-13.0274	-43.3151	-50.9158	-47.0483	-39.4563	-30.5229		60.6	0.722595	0.417134	-0.0494393	-3.09802	-6.10019	-6.31358	-4.85079	-3.2194
60.7	-0.336377	-1.42297	-12.673	-43.5082	-50.9568	-46.4798	-39.1942	-30.3789		60.7	1.02282	0.597107	-0.249586	-3.21543	-5.99624	-6.32487	-5.01748	-3.53483
60.8	-0.358615	-1.55224	-12.7093	-43.6327	-51.1518	-46.5744	-39.4058	-30.1006		60.8	1.30839	0.570068	-0.0878379	-3.13103	-5.67257	-6.24907	-4.82899	-3.60328
60.9	-0.0907009	-1.44685	-12.3977	-43.5424	-51.2061	-47.0314	-39.3472	-30.0549		60.9	0.883154	0.244494	-0.366419	-3.06243	-5.44258	-6.17104	-4.73028	-3.41524
61	-0.361839	-1.35091	-12.5176	-43.342	-51.2405	-47.2371	-39.453	-29.8456		61	0.820048	0.188366	-0.425513	-3.17991	-5.23654	-6.19895	-5.09628	-3.60738
61.1	-0.360984	-1.13531	-12.4715	-43.2657	-51.4269	-47.0583	-39.4286	-29.4999		61.1	0.593615	0.366691	-0.519587	-3.11797	-5.02017	-6.56005	-5.03706	-3.38057
61.2	-0.367639	-1.10792	-12.3788	-43.1546	-51.1956	-47.2916	-39.3275	-29.463		61.2	0.849015	0.900629	-0.54146	-2.96214	-5.192	-6.40476	-5.22933	-3.63946
61.3	-0.500231	-1.22825	-12.2096	-43.2419	-51.171	-47.636	-39.4556	-29.8987		61.3	0.977093	0.926803	-0.680026	-2.77665	-5.52398	-6.20148	-5.25676	-3.92142
61.4	-0.301405	-1.47138	-12.4616	-43.5773	-51.5976	-47.71	-39.2151	-29.9836		61.4	0.82202	1.13142	-0.663385	-2.59596	-5.18625	-6.2453	-4.81173	-3.91704
61.5	-0.184175	-1.52719	-12.9799	-43.3069	-51.2955	-47.8053	-38.9184	-29.9932		61.5	0.908394	1.03235	-0.119961	-2.74134	-5.32894	-6.18173	-4.68448	-3.66973
61.6	0.0329743	-1.15639	-13.5461	-43.1354	-51.3024	-47.9748	-39.2125	-29.9066		61.6	0.500517	0.782548	0.0194654	-3.04148	-5.51005	-5.73762	-4.75623	-3.59476
61.7	-0.357823	-1.04742	-13.2579	-42.8429	-51.3303	-48.0067	-39.1436	-29.8475		61.7	0.476299	0.464089	-0.0599499	-3.31101	-5.50733	-5.8976	-4.84598	-3.50909
61.8	-0.269794	-0.853183	-13.2033	-42.9379	-51.171	-47.9436	-39.3989	-29.9233		61.8	0.120108	0.262315	-0.270229	-3.38906	-5.72805	-5.7635	-4.93515	-3.48067
61.9	-0.46799	-1.0152	-13.6631	-42.972	-51.0017	-47.7248	-39.5535	-30.4149		61.9	0.472552	0.2721	0.172531	-3.20078	-5.68472	-5.73449	-4.51086	-3.29541
62	-0.325817	-1.06657	-13.7423	-42.7071	-50.9666	-47.608	-39.3682	-30.5351		62	0.109854	0.387926	0.280713	-3.28849	-5.71404	-5.82613	-4.75116	-3.3299
62.1	-0.305457	-1.00725	-13.3767	-42.5209	-50.9911	-47.7232	-39.082	-30.484		62.1	-0.0135977	0.254657	-0.0063286	-3.05891	-5.6033	-5.8984	-5.20886	-3.49371
62.2	-0.216667	-0.986779	-13.0434	-41.9841	-51.0639	-47.6603	-38.6372	-30.3448		62.2	-0.123796	0.503392	-0.0527278	-2.92454	-5.67122	-6.16889	-5.28708	-3.5264
62.3	-0.0933895	-1.05451	-13.2075	-41.6399	-50.9064	-47.9207	-38.6028	-30.2404		62.3	-0.0238015	0.669629	-0.211965	-3.1171	-5.75711	-6.18135	-5.3492	-3.54785
62.4	0.0525006	-1.13503	-13.0901	-41.8066	-50.7761	-48.1589	-38.4905	-30.3871		62.4	0.0107498	0.831753	-0.221777	-2.93475	-5.94447	-6.16524	-5.14402	-3.48304
62.5	0.147487	-1.22461	-12.9026	-41.9505	-50.7032	-48.232	-38.5945	-30.2572		62.5	0.135026	1.09763	-0.45988	-2.78059	-6.07687	-6.10609	-4.92676	-3.46591
62.6	0.0558594	-0.750239	-12.9719	-41.8435	-50.6711	-48.2269	-38.7384	-29.7885		62.6	0.361362	1.0098	-0.687712	-2.86553	-6.21311	-6.11441	-5.08298	-3.67962
62.7	-0.184864	-1.05133	-13.0238	-41.3647	-50.7958	-48.2845	-39.0576	-29.5529		62.7	0.572522	1.09948	-0.717726	-3.37935	-5.75603	-6.10632	-4.84258	-3.88289
62.8	-0.406713	-0.789553	-12.9288	-41.0907	-51.0285	-48.2462	-39.3339	-29.9109		62.8	0.754138	0.825244	-0.630846	-3.70339	-5.92079	-6.28405	-4.7901	-3.62995
62.9	-0.161459	-1.04357	-13.2876	-41.1755	-51.036	-48.2991	-39.0263	-30.2406		62.9	0.482511	1.0031	-0.393864	-3.50331	-5.53012	-5.92705	-5.3376	-3.28197
63	-0.348286	-0.784114	-13.6417	-41.5756	-51.2506	-48.3035	-39.0923	-30.2		63	0.608174	0.738107	-0.00938622	-3.19464	-5.40168	-5.73607	-5.43975	-3.105
63.1	-0.279387	-0.900689	-13.378	-41.7958	-51.3721	-48.4788	-39.3773	-30.2015		63.1	0.428174	0.551997	-0.111893	-2.81978	-5.43769	-5.54027	-5.47316	-3.08961
63.2	-0.258929	-0.754944	-13.0567	-41.9506	-51.6757	-48.4893	-39.5808	-29.9414		63.2	0.526852	0.413724	0.00128522	-2.9116	-5.41437	-5.57417	-5.45294	-3.37055
63.3	-0.169259	-0.764884	-12.5264	-42.0276	-51.9892	-48.3851	-39.6507	-30.1004		63.3	0.970673	0.0149784	-0.0919322	-3.18812	-4.92517	-5.68689	-5.24079	-3.3974
63.4	-0.0579377	-0.648749	-12.8675	-42.0034	-51.7254	-48.3501	-39.6618	-30.2993		63.4	0.913165	-0.117681	-0.0391221	-2.98287	-5.47845	-5.81508	-5.15781	-3.60123
63.5	0.184179	-0.341243	-12.8265	-42.0346	-52.023	-47.9103	-39.5592	-30.2202		63.5	0.701664	-0.250185	-0.239229	-2.70987	-5.41789	-5.89459	-5.06252	-3.3845
63.6	0.203557	-0.29266	-12.4073	-41.928	-52.0361	-47.3263	-39.4089	-30.3665		63.6	0.60206	-0.375925	-0.26039	-2.98086	-5.45956	-5.98951	-4.99178	-3.1962
63.7	0.0574366	-0.470519	-12.2312	-41.9094	-52.3875	-47.0683	-38.7712	-30.574		63.7	0.626393	0.0283144	-0.350715	-3.09357	-5.50208	-6.01856	-5.21877	-2.96718
63.8	0.0653873	-0.593495	-11.5344	-41.9689	-52.4085	-47.4847	-38.6151	-30.7028		63.8	0.744683	0.325966	-0.765447	-2.9267	-5.53391	-5.76727	-5.25928	-2.81175
63.9	0.337713	-0.645343	-11.9408	-41.73	-52.0318	-47.6101	-38.4153	-30.399		63.9	0.527668	0.36661	-0.353527	-2.89992	-5.8078	-6.07597	-5.50854	-3.16401
64	0.251263	-0.400645	-12.2145	-41.2814	-52.0709	-47.8983	-38.1948	-30.3991		64	0.542061	0.283449	-0.116794	-3.36979	-5.55155	-6.01505	-5.60459	-3.32844
64.1	0.171889	-0.462289	-12.5517	-41.3351	-52.1063	-48.1761	-38.5215	-30.2155		64.1	0.651238	0.416672	-0.185671	-3.1042	-5.13653	-5.84406	-5.30338	-3.60454
64.2	-0.207372	-0.637559	-12.5316	-41.5522	-52.0534	-48.2793	-38.6885	-30.1419		64.2	0.606321	0.523684	-0.115298	-3.14856	-5.1235	-5.76753	-5.21684	-3.49884
64.3	-0.0205701	-0.672106	-12.6553	-41.6195	-51.556	-48.3431	-38.5981	-30.257		64.3	0.650438	0.376059	-0.212765	-2.97953	-5.19726	-5.59733	-5.23038	-3.29078
64.4	0.183899	-1.08639	-12.7963	-41.9511	-51.481	-48.2996	-38.5497	-30.3301		64.4	0.336231	0.65179	-0.10953	-3.13783	-5.42278	-5.72407	-5.02944	-3.15399
64.5	0.153174	-1.19091	-12.7611	-42.5681	-50.9827	-48.6189	-38.8932	-30.4647		64.5	0.317826	0.629918	-0.426065	-2.95031	-5.54396	-5.70235	-5.42201	-3.42673
64.6	0.0215801	-0.983819	-12.7371	-42.5898	-51.1139	-48.4858	-39.1267	-30.456		64.6	0.507068	0.61112	-0.290385	-3.02529	-5.76602	-5.95744	-5.31667	-3.63526
64.7	-0.158104	-0.832433	-12.5183	-42.2251	-51.0462	-48.586	-39.4462	-30.6355		64.7	0.391329	0.273858	-0.16965	-3.22123	-5.86567	-6.04016	-5.33661	-3.42938
64.8	-0.215482	-0.857128	-12.2244	-41.7125	-51.6416	-48.7614	-39.6994	-30.6273		64.8	0.304411	0.395137	-0.476867	-3.47755	-5.58146	-5.79764	-5.4778	-3.54738
64.9	0.12994	-0.602232	-12.5383	-41.5522	-51.4928	-48.5454	-39.6685	-30.6502		64.9	0.287211	0.617245	-0.438477	-3.59229	-5.30423	-5.73092	-5.47435	-3.49879
65	0.425668	-0.87816	-12.6685	-41.4779	-51.5536	-48.4885	-39.564	-30.5331		65	-0.137557	0.471897	-0.563917	-3.89274	-5.31877	-5.58759	-5.46831	-3.78587
65.1	0.168548	-1.17056	-12.4824	-41.7772	-51.4741	-48.3101	-39.1559	-30.5137		65.1	0.139118	0.481568	-0.485172	-3.68515	-5.49284	-5.77566	-5.74321	-3.81666
65.2	0.186446	-1.22239	-12.0649	-41.9211	-51.5187	-48.1409	-39.1699	-30.4133		65.2	0.285691	0.511904	-0.577243	-3.84678	-5.51291	-5.91187	-5.79272	-3.92432
65.3	-0.0269361	-1.09389	-12.2487	-41.9552	-51.6044	-48.2242	-38.9724	-30.3434		65.3	0.177715	0.431508	-0.604872	-3.947	-5.58076	-6.22629	-5.95127	-3.82062
65.4	-0.187431	-1.21044	-12.5286	-41.7644	-51.4867	-47.8201	-38.9299	-30.2037		65.4	0.517169	0.654083	-0.306195	-3.87567	-5.2812	-6.26676	-5.80667	-3.76251
65.5	-0.30186	-1.34342	-12.6974	-41.7292	-51.0164	-48.0966	-38.8388	-30.0962		65.5	0.791568	1.00263	-0.224641	-3.48841	-5.38989	-6.0214	-5.51115	-3.91637
65.6	-0.171382	-1.39075	-12.902	-41.8091	-51.1303	-48.0141	-39.1868	-29.991		65.6	0.78305	0.861481	-0.308686	-3.449	-5.19084	-5.79736	-5.57236	-3.71342
65.7	-0.0714649	-1.13595	-12.8332	-41.9113	-50.8706	-48.103	-39.542	-30.0499		65.7	0.818305	0.533327	-0.168005	-3.542	-5.46398	-5.96984	-5.1697	-3.78189
65.8	0.0507878	-1.3016	-12.8361	-41.7981	-50.9883	-47.5642	-39.6303	-29.8974		65.8	0.726873	0.113051	-0.15135	-3.35936	-5.28926	-6.13335	-4.55253	-3.7192
65.9	0.186288	-1.21148	-12.8137	-41.3605	-51.1401	-47.8771	-39.6512	-30.1643		65.9	0.46511	0.142111	-0.0280045	-3.52916	-4.86454	-6.04522	-4.58746	-3.66429
66	-0.00660714	-1.37849	-12.7189	-41.4176	-51.1016	-48.2435	-39.5457	-29.7976		66	0.589894	0.18913	0.060955	-3.37474	-5.14314	-6.02501	-5.02867	-3.94724
66.1	0.00362088	-1.38517	-12.2862	-41.5412	-51.0952	-47.8662	-39.731	-29.6913		66.1	0.659645	0.542206	-0.280181	-3.61353	-5.28582	-5.97042	-5.02818	-4.11051
66.2	-0.0903626	-1.31919	-12.2169	-41.0862	-51.2439	-47.7307	-39.4589	-29.8512		66.2	0.302556	0.559769	-0.145357	-3.86333	-5.26941	-6.27701	-5.48575	-4.04052
66.3	-0.428651	-1.3418	-12.3314	-41.2133	-50.824	-47.4346	-39.3266	-29.9339		66.3	0.473375	0.716015	-0.1636	-3.90269	-5.34334	-6.09068	-5.61529	-3.91095
66.4	-0.361474	-1.4544	-12.4751	-41.3444	-50.8644	-47.7322	-39.0849	-29.8802		66.4	0.426186	0.972023	-0.183431	-3.70034	-5.55154	-5.77459	-5.71448	-3.74511
66.5	-0.444959	-1.32084	-12.5631	-41.1889	-50.8923	-47.7466	-39.1457	-30.5207		66.5	0.537632	0.704432	-0.315176	-3.64059	-5.75185	-5.80393	-5.80114	-3.36872
66.6	-0.501738	-1.40936	-12.4731	-41.3592	-51.1366	-48.1717	-39.3827	-30.3143		66.6	0.763473	0.946857	-0.659883	-3.60107	-5.40692	-5.76715	-5.56468	-3.2436
66.7	-0.469057	-1.19544	-12.6986	-41.1113	-51.3743	-48.1311	-39.349	-30.2182		66.7	0.741233	1.04509	-0.310411	-3.37173	-5.08592	-5.84985	-5.35862	-3.2994
66.8	-0.661655	-1.09591	-12.4835	-41.4894	-51.7277	-47.9374	-39.2271	-30.5192		66.8	0.91912	1.14806	-0.129248	-3.16804	-5.41623	-5.87759	-5.44369	-3.09168
66.9	-0.302038	-1.52756	-12.4752	-41.9859	-52.1792	-48.0376	-39.2367	-30.5078		66.9	0.531063	1.22663	0.0338772	-3.02417	-5.43306	-5.73468	-5.67584	-2.98181
67	-0.244619	-1.74663	-12.5813	-42.3546	-52.2575	-48.0593	-38.9494	-30.6347		67	0.708858	0.852655	-0.036424	-2.81904	-5.39021	-5.44743	-5.57889	-3.3784
67.1	-0.328744	-1.35736	-12.5775	-42.1232	-52.363	-48.2384	-39.1246	-30.7917		67.1	1.01047	0.66186	-0.519509	-2.85824	-5.17753	-5.50632	-5.54613	-3.28568
67.2	-0.301381	-1.15347	-12.6223	-41.9049	-51.9772	-48.1202	-39.0856	-30.6187		67.2	1.00559	0.408537	-0.428365	-2.88444	-5.10487	-5.30769	-5.44763	-3.41602
67.3	-0.247888	-0.941565	-12.591	-41.9863	-51.9662	-48.1187	-39.058	-30.5058		67.3	0.752327	0.123337	-0.45252	-2.78022	-5.2364	-5.46543	-5.13357	-3.47557
67.4	-0.19171	-0.710394	-12.4746	-41.9524	-51.8155	-48.1025	-39.2512	-30.4846		67.4	0.742405	0.168827	-0.501484	-2.67624	-5.2674	-5.65141	-4.87307	-3.35152
67.5	-0.269045	-0.728938	-12.4339	-42.0999	-51.1519	-47.8537	-39.308	-30.2523		67.5	0.969866	0.463579	-0.342457	-2.89739	-5.40779	-6.06238	-4.8132	-3.75173
67.6	0.0294146	-0.965753	-12.0639	-42.1122	-51.2422	-47.6739	-39.1095	-30.3219		67.6	0.917234	0.452912	-0.285263	-2.93146	-5.60556	-5.90375	-4.91659	-3.477
67.7	0.00826258	-0.956074	-12.1923	-42.1712	-50.9637	-47.7678	-38.9644	-29.7535		67.7	0.891686	0.230366	-0.202352	-2.84902	-5.62579	-5.97786	-5.08359	-3.93351
67.8	-0.312226	-1.21211	-12.2409	-42.0113	-50.7836	-47.8712	-39.0685	-29.6057		67.8	1.11284	0.18999	-0.288611	-3.08377	-5.80165	-5.84768	-5.43939	-3.79804
67.9	-0.125401	-1.4561	-12.1946	-41.7801	-50.5601	-47.7812	-38.7939	-29.6277		67.9	0.956401	0.917062	-0.102837	-3.25887	-5.95349	-6.00049	-5.56025	-3.56134
68	-0.210718	-1.49856	-12.2	-41.6853	-50.462	-47.8918	-39.2552	-29.9294		68	0.781457	0.906983	-0.276784	-3.24162	-5.95703	-6.02002	-5.61415	-3.5539
68.1	-0.341656	-1.25032	-12.4219	-41.4271	-50.8748	-48.095	-39.261	-30.0726		68.1	0.900567	1.15183	-0.00648689	-3.45004	-5.87222	-5.7894	-5.41623	-3.30766
68.2	-0.548966	-1.02413	-12.5301	-41.5004	-50.7637	-48.132	-39.2076	-30.4642		68.2	0.899053	0.696749	-0.0034536	-3.15052	-5.65098	-5.91925	-5.47819	-3.06502
68.3	-0.535381	-1.35569	-12.3625	-41.3923	-51.1198	-48.0782	-39.081	-30.2953		68.3	0.891091	1.15105	-0.10691	-3.01661	-5.52967	-5.83295	-5.70218	-3.0984
68.4	-0.384203	-1.73802	-12.1891	-41.5351	-51.1394	-47.8526	-39.4665	-29.9742		68.4	0.515251	1.3606	-0.0438998	-2.9821	-5.59426	-6.05103	-5.32007	-3.32482
68.5	-0.0911686	-1.42503	-12.4646	-41.6002	-51.5882	-47.5869	-39.4771	-29.7964		68.5	0.537078	1.11417	-0.320747	-2.95903	-5.21211	-5.9879	-5.19252	-3.44434
68.6	0.23711	-1.35473	-12.5519	-41.929	-51.3504	-47.763	-39.4866	-29.7256		68.6	0.219036	0.963698	-0.0240018	-3.00375	-5.12059	-5.47828	-5.04592	-3.52361
68.7	-0.230205	-1.20593	-13.0148	-41.6792	-51.3175	-48.0199	-39.2248	-29.5231		68.7	0.328041	1.07758	0.204046	-2.96151	-4.95194	-5.52773	-5.19222	-3.44115
68.8	-0.592514	-1.21918	-13.0409	-41.9025	-51.3684	-48.336	-39.2366	-29.7357		68.8	0.571225	1.22778	0.235293	-3.13426	-4.84677	-5.43244	-5.07146	-3.29043
68.9	-0.472737	-1.2885	-13.0516	-41.9606	-51.3111	-48.3936	-39.2372	-29.9342		68.9	0.47786	1.11033	0.371283	-3.11398	-5.01915	-5.3596	-5.0756	-3.19979
69	-0.879413	-0.811402	-12.9516	-42.0185	-51.277	-48.4742	-39.4069	-30.4804		69	0.907114	0.854391	0.300148	-2.92252	-5.25738	-5.2343	-5.18026	-2.68454
69.1	-0.949201	-0.509523	-12.8542	-42.3457	-51.0069	-48.5631	-39.4764	-30.357		69.1	0.807335	0.545757	0.231551	-2.79295	-5.30745	-5.43952	-5.54212	-2.73664
69.2	-1.00594	-0.717426	-12.5519	-42.1502	-50.8276	-48.7444	-39.3891	-30.5583		69.2	1.043	0.641265	-0.0383441	-3.05411	-5.43945	-5.52983	-5.39296	-2.53006
69.3	-0.471713	-0.875938	-12.6337	-42.3327	-50.5665	-48.9133	-39.7121	-30.526		69.3	0.621368	0.620992	-0.0245932	-2.83628	-5.59253	-5.4427	-5.10294	-2.63536
69.4	-0.127785	-0.964314	-12.5615	-42.1311	-50.5924	-48.8808	-39.178	-30.5544		69.4	0.491826	0.604238	-0.104402	-3.01661	-5.43684	-5.60107	-5.3362	-2.62411
69.5	-0.175876	-0.838033	-12.3817	-42.3874	-50.7348	-48.3426	-39.5989	-30.6075		69.5	0.653947	0.514897	-0.339129	-2.77857	-5.18656	-5.84992	-5.30602	-2.64532
69.6	-0.338073	-0.759165	-12.5462	-42.494	-50.9318	-48.1066	-39.7829	-30.4337		69.6	0.80858	0.433783	-0.325352	-3.07911	-5.22793	-5.90237	-5.1307	-2.94254
69.7	-0.123274	-0.992463	-12.4269	-42.4268	-51.3042	-48.0828	-39.4492	-30.6936		69.7	0.96145	0.36647	-0.703352	-2.85214	-5.23327	-5.95994	-5.44374	-3.18135
69.8	-0.150471	-1.09428	-12.2873	-42.6231	-51.3352	-48.2344	-39.7555	-30.6057		69.8	0.923142	0.591288	-0.678039	-2.73413	-4.90716	-5.94529	-5.33357	-3.40978
69.9	-0.349352	-0.858063	-12.1601	-42.6616	-51.3228	-48.4461	-39.5688	-30.4618		69.9	1.02336	0.573428	-0.51663	-2.72453	-4.41214	-5.89419	-5.30177	-3.3406
70	-0.16762	-0.924924	-12.3561	-42.1436	-50.7194	-48.3993	-39.6445	-30.3502		70	0.684531	0.472824	0.0949828	-2.7198	-4.93635	-6.01348	-5.26705	-3.26024
70.1	-0.153842	-0.952766	-12.5411	-42.1018	-50.958	-48.0787	-39.6576	-30.1592		70.1	0.46819	0.482857	0.663552	-2.83523	-4.87241	-6.14053	-5.81682	-3.40951
70.2	-0.436105	-0.462317	-12.6365	-41.7648	-50.9625	-47.6754	-39.7165	-30.4335		70.2	0.284246	0.0193682	0.606107	-3.35631	-5.36911	-6.08844	-5.57361	-2.85108
70.3	-0.00875799	-0.495465	-12.9416	-41.3068	-50.9439	-47.4449	-39.9267	-30.3316		70.3	0.347063	0.125727	0.745562	-3.51552	-5.5142	-6.16174	-5.54345	-2.82855
70.4	0.0339734	-0.800031	-12.8023	-41.0628	-50.7229	-47.3064	-39.6164	-30.4807		70.4	0.262395	0.459649	0.375643	-3.53584	-5.6172	-5.76436	-5.64787	-2.70546
70.5	-0.0489099	-0.965908	-12.8308	-40.6116	-51.056	-47.2831	-39.5318	-30.082		70.5	0.523244	0.628152	0.0740339	-3.28185	-5.64316	-5.86816	-5.40028	-2.81453
70.6	-0.0457965	-1.15045	-12.8411	-40.7053	-51.153	-47.1628	-39.1089	-30.0271		70.6	0.36068	0.555938	-0.00848657	-3.2872	-5.62384	-6.07969	-5.19877	-2.54569
70.7	-0.147644	-1.15238	-12.4666	-40.2863	-51.1077	-47.4876	-39.3234	-29.8893		70.7	0.116532	0.59666	-0.248437	-3.28561	-5.63915	-5.92715	-5.23628	-2.9601
70.8	-0.170095	-0.860531	-12.5779	-40.6108	-51.136	-47.5103	-39.1742	-29.8575		70.8	0.174195	0.486598	-0.0537622	-3.31302	-5.53851	-6.32302	-5.13843	-3.17091
70.9	-0.254895	-1.00653	-12.6836	-40.7234	-51.5004	-47.7636	-39.0491	-29.8347		70.9	0.329758	0.789028	-0.249922	-3.70378	-4.91352	-6.34978	-5.03831	-3.29121
71	-0.457462	-1.21557	-12.6718	-40.6099	-51.2871	-48.0575	-38.8897	-29.7874		71	0.421332	0.921053	-0.40802	-3.59095	-5.26003	-6.69522	-5.42238	-3.39691
71.1	-0.328641	-0.97806	-12.2044	-41.0033	-51.0258	-48.0598	-38.563	-30.3266		71.1	0.459405	0.723532	-0.525336	-3.68879	-5.43753	-6.5833	-5.64114	-3.06516
71.2	-0.374996	-1.29015	-11.8647	-41.175	-50.6495	-48.1587	-38.7854	-30.2701		71.2	0.66145	1.14054	-0.648342	-3.46174	-5.7095	-6.0869	-5.54476	-2.96687
71.3	-0.257764	-0.992408	-11.6848	-41.4069	-50.4175	-48.0363	-38.8217	-30.2114		71.3	0.690863	0.832861	-0.886216	-3.52472	-5.63997	-6.29455	-5.45313	-3.02063
71.4	-0.481637	-1.03798	-11.7794	-41.3249	-50.4515	-48.1862	-39.2353	-30.126		71.4	1.03808	0.651895	-0.92165	-3.78571	-5.43741	-6.54933	-4.88987	-3.25752
71.5	-0.244462	-0.965909	-11.6759	-41.5012	-51.0956	-48.1166	-39.1086	-30.3172		71.5	0.887739	0.7072	-0.735826	-3.59372	-5.31482	-6.49171	-5.23638	-3.1255
71.6	-0.129082	-0.988864	-12.0189	-41.8661	-51.2118	-47.9337	-39.4569	-30.019		71.6	0.879795	0.15374	-0.302575	-3.19788	-5.24227	-6.53456	-5.07193	-3.39425
71.7	-0.196536	-0.668507	-11.9815	-41.1572	-51.4372	-47.8121	-39.5164	-29.7708		71.7	0.8459	0.202989	-0.65854	-3.3861	-5.42206	-6.43065	-5.1695	-3.42723
71.8	-0.0310105	-0.616948	-12.3302	-41.2074	-51.5717	-48.3062	-39.5928	-29.7834		71.8	0.709092	0.0436229	-0.419924	-3.38112	-5.38939	-6.02897	-5.04099	-3.56037
71.9	-0.107664	-0.739215	-12.2597	-41.0739	-51.2011	-48.2412	-39.3546	-29.69		71.9	0.539403	0.249566	-0.167244	-3.34571	-5.20485	-5.87041	-5.13673	-3.31818
72	-0.201064	-0.930403	-12.4777	-41.1133	-51.3412	-48.2987	-39.7846	-29.9099		72	0.615049	0.357989	0.176139	-3.20881	-5.06914	-5.72882	-5.02291	-3.36233
72.1	0.102983	-0.892177	-12.3949	-41.1947	-50.8654	-48.3074	-40.0753	-29.7229		72.1	0.756671	0.596407	0.119297	-2.98293	-5.62199	-5.74037	-4.71313	-3.45622
72.2	-0.114818	-0.690092	-12.4669	-41.1723	-51.1416	-48.5868	-39.7448	-29.6376		72.2	0.74293	0.346735	-0.106963	-2.87176	-5.30611	-5.63187	-4.98911	-3.14366
72.3	0.199839	-0.454793	-12.3754	-41.3982	-51.1992	-48.4862	-39.5122	-29.5222		72.3	0.563693	0.120674	-0.249559	-2.84166	-5.45625	-5.45947	-5.46962	-3.38432
72.4	-0.395134	-0.693876	-12.1248	-41.6881	-51.459	-48.3566	-39.5208	-29.9698		72.4	0.810677	0.137645	-0.489148	-2.84005	-5.70374	-5.5151	-5.21951	-3.14021
72.5	-0.733348	-0.736052	-12.5379	-41.7841	-51.2897	-48.053	-39.4079	-29.9112		72.5	0.880984	0.481161	-0.315696	-2.99652	-5.54434	-5.89351	-5.18227	-3.4988
72.6	-0.641953	-1.23468	-12.3795	-42.237	-51.4807	-47.7591	-39.4488	-30.1759		72.6	0.938604	1.06534	-0.39838	-2.53289	-5.17642	-5.91587	-5.24809	-3.28757
72.7	-0.489048	-1.21375	-12.0831	-42.3173	-51.7192	-47.9833	-39.0811	-30.0321		72.7	0.653666	0.75191	-0.595074	-2.56883	-5.10229	-5.71897	-5.38245	-3.44188
72.8	-0.273574	-1.32114	-12.0373	-42.1607	-51.6637	-48.1812	-38.9936	-29.7024		72.8	0.610884	0.670687	-0.528829	-2.82276	-5.14968	-5.49475	-5.19218	-3.81498
72.9	-0.2451	-1.41475	-11.8507	-41.8915	-51.7603	-48.299	-38.7506	-29.9653		72.9	0.456509	0.729064	-0.623321	-2.9167	-5.09381	-5.75114	-5.61968	-3.26418
73	-0.216008	-1.04468	-11.8451	-41.9033	-51.365	-48.1032	-38.7058	-29.5243		73	0.578101	0.524195	-0.616254	-3.19576	-5.3261	-5.86407	-5.77047	-3.28304
73.1	-0.102691	-1.14289	-12.0937	-41.8442	-51.3411	-48.1759	-38.4782	-29.3765		73.1	0.724304	0.587844	-0.403939	-3.38364	-5.5453	-5.68816	-5.90681	-3.28297
73.2	-0.0742449	-1.25874	-12.3334	-41.3798	-51.0483	-47.9473	-38.7209	-29.3741		73.2	0.512908	0.744343	-0.161787	-3.90529	-5.49399	-5.62895	-5.44421	-3.28812
73.3	0.105766	-1.42948	-12.5287	-41.6105	-50.8966	-47.7958	-38.7529	-29.8915		73.3	0.291663	0.721929	-0.0276027	-3.83943	-5.67087	-5.87114	-5.35713	-3.03853
73.4	-0.451619	-1.40952	-12.4514	-41.6087	-50.6559	-47.7093	-38.4838	-30.0342		73.4	0.880487	0.839903	-0.104572	-3.74483	-5.61148	-5.92207	-5.00119	-2.9144
73.5	-0.159287	-1.58476	-12.189	-42.0019	-50.7495	-47.9291	-38.6062	-30.2522		73.5	0.772002	0.703939	-0.136329	-3.71048	-5.5145	-5.68439	-5.33327	-2.80733
73.6	0.10791	-1.1895	-11.6924	-42.1622	-50.6165	-47.7791	-38.6953	-30.4452		73.6	0.468669	0.574127	-0.542906	-3.37532	-5.25134	-5.64123	-5.38376	-3.05019
73.7	0.0929557	-1.19464	-11.8155	-42.127	-50.6292	-48.0899	-38.1747	-30.3377		73.7	0.621209	0.554891	-0.543218	-2.96219	-5.10292	-5.51065	-5.76513	-3.28289
73.8	0.320885	-1.13836	-11.6001	-42.2855	-50.8199	-47.8813	-38.041	-30.5008		73.8	0.351577	0.479656	-0.685338	-2.58013	-5.34313	-5.80658	-5.56548	-3.29022
73.9	-0.0876677	-0.88335	-12.0276	-42.1469	-50.8821	-47.8987	-38.6863	-30.2731		73.9	0.353923	0.166884	-0.24625	-2.70806	-5.2135	-5.89006	-5.16513	-3.14628
74	0.345371	-1.16462	-11.9023	-42.3085	-51.1994	-47.979	-38.5151	-29.9839		74	0.141702	0.682072	-0.341121	-2.90734	-4.90503	-5.6753	-5.28695	-3.24763
74.1	0.171102	-0.983727	-12.0604	-42.104	-51.3813	-47.3941	-38.3303	-30.2683		74.1	0.0518158	0.442617	-0.343205	-3.22253	-4.70774	-5.83523	-5.71471	-3.04838
74.2	-0.0534441	-0.847821	-12.4364	-41.6238	-51.1514	-47.359	-38.7445	-30.4553		74.2	0.400972	0.502851	-0.0112174	-3.30534	-4.75127	-5.341	-5.63131	-2.70956
74.3	-0.445762	-0.903481	-12.5832	-41.567	-51.1675	-47.5201	-38.7893	-30.5789		74.3	0.621014	0.583852	0.403047	-3.40816	-4.92721	-5.47444	-5.61462	-2.60168
74.4	-0.404305	-1.00052	-12.4497	-41.4464	-51.3377	-47.1584	-38.8528	-30.9826		74.4	0.339545	0.404961	0.0106507	-3.02611	-5.08367	-5.49925	-5.72953	-2.39601
74.5	-0.607302	-1.22191	-12.3463	-40.9849	-51.0074	-47.0582	-39.3571	-30.7485		74.5	0.700469	0.442428	-0.525284	-2.96096	-5.44795	-5.46326	-5.21025	-2.61183
74.6	-0.790345	-1.55701	-12.4678	-41.356	-51.8811	-47.1559	-39.0664	-30.7914		74.6	0.804371	0.549841	-0.506313	-2.95636	-5.42093	-5.58796	-5.40071	-3.13013
74.7	-0.678157	-1.5939	-12.4952	-41.9166	-51.9584	-47.1334	-38.9939	-30.7872		74.7	0.955356	0.453087	-0.433199	-2.73641	-5.70871	-5.67613	-5.14738	-3.42043
74.8	-0.502337	-1.68609	-12.5464	-41.8211	-52.1284	-47.1351	-39.2435	-30.6463		74.8	0.475766	0.861827	-0.264208	-2.95543	-5.63461	-5.75351	-4.89568	-3.45793
74.9	-0.402967	-1.46889	-12.9128	-42.0148	-52.1808	-47.191	-39.0968	-30.356		74.9	0.323276	0.686278	-0.291876	-2.78162	-5.36831	-5.9259	-4.82468	-3.63818
75	-0.317372	-1.52221	-13.0131	-42.1299	-52.3766	-47.3561	-38.9264	-30.3609		75	0.360666	0.632284	0.0122282	-2.53861	-4.98214	-5.94563	-4.87298	-3.11659
75.1	-0.191012	-1.6694	-12.7723	-41.338	-52.4436	-47.2075	-38.7152	-29.7783		75.1	0.292892	0.477764	-0.200506	-2.88714	-5.01408	-5.60103	-5.10285	-3.35016
75.2	-0.282345	-1.22178	-12.6074	-41.4655	-51.9339	-47.2098	-38.6321	-29.6468		75.2	0.444771	0.67286	-0.0778411	-2.78896	-5.21617	-5.77682	-5.03479	-3.21417
75.3	-0.539289	-1.30465	-12.6159	-41.4473	-51.3729	-47.018	-38.8759	-29.2584		75.3	0.744107	0.669378	-0.16285	-3.00169	-5.54104	-5.75507	-4.69223	-3.45643
75.4	-0.266191	-1.26898	-12.7036	-41.4111	-51.4485	-47.0394	-38.517	-29.2746		75.4	0.600503	0.831506	0.00441375	-3.14611	-5.38499	-5.81707	-5.3965	-3.60512
75.5	0.16133	-0.872514	-12.544	-41.7986	-51.5957	-46.6954	-38.1805	-29.5423		75.5	0.327083	0.687499	-0.288996	-3.23967	-5.37043	-6.02079	-5.63774	-3.43586
75.6	0.248515	-0.583046	-12.8043	-41.8524	-51.6973	-46.7701	-38.451	-29.655		75.6	0.228433	0.361816	-0.156535	-2.93547	-5.23776	-5.94681	-5.78053	-3.36371
75.7	0.22938	-0.659228	-12.7498	-41.538	-52.0859	-47.1467	-38.3812	-29.9093		75.7	0.341706	0.494754	0.0251075	-3.2217	-5.08539	-5.8097	-5.24422	-3.65754
75.8	0.0359565	-0.912702	-12.6552	-41.0779	-52.4952	-47.0009	-38.7502	-30.0155		75.8	0.287072	0.772275	-0.333114	-3.34949	-4.95593	-5.95224	-5.2194	-3.47442
75.9	0.217914	-0.794109	-12.2633	-41.6558	-52.0843	-47.0291	-38.7709	-29.9765		75.9	0.582305	0.888331	-0.417218	-2.83098	-5.23228	-5.80176	-5.14104	-3.77675
76	0.208273	-0.892109	-12.3228	-41.5946	-51.77	-47.2307	-39.0998	-29.8895		76	0.531646	0.681988	-0.25176	-2.83343	-5.45266	-5.71804	-5.14868	-3.76769
76.1	0.125872	-0.974198	-12.5168	-41.6667	-51.6853	-47.1479	-39.3132	-29.7898		76.1	0.613757	0.677515	-0.101482	-3.01882	-5.66496	-5.81365	-4.99603	-3.81247
76.2	-0.320553	-0.494229	-12.4532	-41.6266	-51.8115	-47.0812	-39.4439	-30.1351		76.2	0.275054	0.215223	-0.0700345	-3.13636	-5.64586	-5.92215	-5.24631	-3.53229
76.3	-0.236377	-0.394884	-12.6323	-41.2806	-51.3014	-47.2379	-39.4827	-30.3709		76.3	0.590803	0.0370312	0.085935	-3.02604	-5.89176	-5.67272	-5.25357	-3.40998
76.4	-0.0638289	-0.327467	-12.6795	-41.4412	-51.2421	-47.0953	-39.2288	-30.3313		76.4	0.414131	-0.0610805	0.019741	-3.36279	-6.13585	-5.68878	-5.46043	-3.36535
76.5	0.101459	-0.483812	-12.9148	-41.7381	-51.1577	-47.0393	-39.2656	-30.4938		76.5	0.702509	0.0730042	0.185033	-3.23858	-6.13756	-5.60996	-5.07182	-2.90803
[truncated: 1,282 more rows]

## Sheet: Fig.4g
Figure 4, Panel G, Top						Figure 4, Panel G, Bottom
[truncated: 10 more rows]

## Sheet: Fig.4h
Figure 4, Panel H
[truncated: 1,187 more rows]
