# Supplementary material for: A non-conducting role of the Cav1.4 Ca2+ channel drives homeostatic plasticity at the cone photoreceptor synapse
Source: eLife. 2024 Nov 12;13:RP94908. doi: 10.7554/eLife.94908 (PMC11556788; doi:10.7554/eLife.94908)
Supplement: Figure 5—source data 1. [file elife-94908-fig5-data1.xlsx]

## Sheet: Sheet1
Figure 5b: Macaque cone IV										Figure 5d: Macaque cone activation curve V1/2 (mV)
Vm (mV)	Peripheral -90 mV holding				Peripheral -50 mV holding					Cone -90 mV holding	Cone -50 mV holding
-80	0	0	0		-14.37	0	0			-33.65	-34.4
-75	0	0	0		-9.57	0	0			-35.19	-34.92
-70	0	0	0		-7.92	0	0			-42.98	-43.96
-65	0	0	-6.77		-7.71	0	0
-60	0	-4.43	-5.55		-3.92	0	0
-55	0	-13.29	-8.52		-1.57	0	0			Figure 5e: Macaque cone activation curve slope factor (k)
-50	-0.84	-21.42	-34.88		-0.19	-3.33	-1.57			Cone -90 mV holding	Cone -50 mV holding
-45	-10.86	-23.02	-90.56		-7.93	-10.32	-73.93			3.736	3.226
-40	-39.93	-79.02	-159.24		-36.44	-52.57	-115.15			4.12	3.727
-35	-107.66	-163.99	-192.67		-100.55	-119.64	-138.36			3.858	2.728
-30	-171.14	-224.67	-195.04		-155.17	-189.14	-145.62
-25	-208.2	-260.18	-195.73		-178.72	-195.2	-141.01
-20	-213.73	-257.12	-182.4		-177.71	-195.26	-124.1			Figure 5g: Macaque cone prepulse inactivation
-15	-202.18	-238.81	-181.28		-168.9	-193.01	-120.6			P1	P2
-10	-182.09	-230.78	-154.92		-149.52	-188.8	-85.98			-183.41	-170.14
-5	-151.43	-204.29	-140.38		-119.01	-130.15	-59.18			-193.52	-183.94
0	-125.38	-179.26	-107.6		-95.43	-118.73	-31.2			-190.52	-177.28
5	-97.11	-136.22	-82.17		-60.58	-107.53	-17.53			-142.34	-138.84
10	-62.86	-124.01	-70.6		-33.44	-54.97	28.83			-113	-111.09
15	-34.82	-102.96	-44.58		9.27	-19.44	51.26
20	-38.81	-72.25	-30.32		33.47	16	74.31
25	17.78	-64.8	-9.7		72.53	56.31	89.94
30	34	-55.74	4.65		103.04	91.24	111.03
35	58.93	-44.76	17.35		121.35	112.16	129.43
40	84.23	-48.83	30.92		136.83	119.7	152.58
45	85.95	-42.33	54.38		167.09	146.75	171.11
Figure 5c: Macaque cone activation (G/Gmax)
Vm (mV)	Peripheral -90 mV holding				Peripheral -50 mV holding
-80	0	0	0		0.0455785	0	0
-75	0	0	0		0.0314782	0	0
-70	0	0	0		0.0270529	0	0
-65	0	0	0.0224073		0.027389	0	0
-60	0	0.0111975	0.0191348		0.0145056	0	0
-55	0	0.0350531	0.0306516		0.00606224	0	0
-50	0.00283276	0.0590645	0.131188		0.00076699	0.011224	0.00860352
-45	0.0383675	0.0664991	0.356828		0.0335363	0.0364407	0.424424
-40	0.148123	0.239683	0.658815		0.161812	0.19491	0.694117
-35	0.420391	0.523593	0.839077		0.469992	0.466927	0.877922
-30	0.705395	0.757186	0.896587		0.765591	0.779178	0.975321
-25	0.908625	0.928442	0.952686		0.933654	0.851446	1
-20	0.991057	0.974868	0.943292		0.986401	0.904939	0.935084
-15	1	0.965809	1		1	0.954145	0.969293
-10	0.964964	1	0.915632		0.94849	1	0.740403
