# Supplementary material for: A non-conducting role of the Cav1.4 Ca2+ channel drives homeostatic plasticity at the cone photoreceptor synapse
Source: eLife. 2024 Nov 12;13:RP94908. doi: 10.7554/eLife.94908 (PMC11556788; doi:10.7554/eLife.94908)
Supplement: Figure 6—source data 1. [file elife-94908-fig6-data1.xlsx]

## Sheet: Fig. 6b
CtBP2 Vol. Occupancy
	CAR Volume (µm^3)	CtBP2 Volume (µm^3)			CAR Volume (µm^3)	CtBP2 Volume (µm^3)
WT1	24.2157	0.883527		KI1	17.2933	2.1474
WT2	26.4879	2.55799		KI2	17.8359	1.87225
WT3	19.0152	2.49019		KI3	37.2083	4.22975
WT4	15.3586	1.78267		KI4	30.9541	5.59072
WT5	41.1638	1.62392		KI5	27.016	4.15083
WT6	20.4848	1.62605		KI6	29.601	3.17166
WT7	20.4085	1.14645		KI7	23.8565	2.56515
WT8	17.6332	1.0008		KI8	15.174	2.48974
WT9	18.3211	1.82289		KI9	16.9878	2.83222
WT10	19.2995	1.71807		KI10	13.7086	1.95833
WT11	23.1211	2.48974		KI11	14.6553	2.44799
WT12	25.7652	2.58998		KI12	12.5754	2.86788
CaV1.4 Vol. Occupancy
	CAR Volume (µm^3)	CaV1.4 Volume (µm^3)			CAR Volume (um^3)	CaV1.4 Volume (µm^3)
WT1	11.7364	0.458579		KI1	15.7121	1.39006
WT2	13.4344	0.652828		KI2	12.6114	1.8782
WT3	16.3286	0.81615		KI3	13.6712	2.10429
WT4	19.8329	1.26498		KI4	28.2147	3.19558
WT5	17.6488	0.763893		KI5	12.0017	1.84376
WT6	17.8351	1.58324		KI6	15.8408	1.8622
WT7	14.155	1.15254		KI7	13.2144	2.30326
WT8	17.643	1.84574		KI8	16.7601	1.6716
WT9	15.8688	1.11994		KI9	12.2331	1.75265
WT10	30.8098	2.18589		KI10	12.6272	0.979263
WT11	21.8823	2.40579		KI11	13.3721	0.806654
WT12	23.5077	2.39383		KI12	36.0354	3.55498
WT13	27.1114	3.459		KI13	23.5717	3.49625
WT14	41.3832	2.98389		KI14	43.6395	4.85714
WT15	25.8621	2.44205		KI15	23.394	4.49377
Bassoon Vol. Occupancy
	CAR Volume (µm^3)	Bassoon Volume (µm^3)			CAR Volume (µm^3)	Bassoon Volume (µm^3)
WT1	24.2157	0.636527		KI1	17.2933	0.753228
WT2	26.4879	0.978405		KI2	17.8359	1.80263
WT3	19.0152	1.00415		KI3	37.2083	2.8307
WT4	15.3586	0.733117		KI4	30.9541	4.23599
WT5	41.1638	1.0427		KI5	27.016	3.33392
WT6	20.4848	0.691526		KI6	29.601	4.42232
WT7	20.4085	0.830014		KI7	23.8565	3.25439
WT8	17.6332	0.928737		KI8	15.174	1.50966
WT9	18.3211	1.42601		KI9	16.9878	1.97418
WT10	19.2995	1.28707		KI10	13.7086	1.52215
WT11	23.1211	1.42693		KI11	14.6553	1.40164
WT12	25.7652	1.65424		KI12	12.5754	2.61543

## Sheet: Fig. 6c
GPR179
WT	CAR Volume (µm^3)	GPR179 Volume (µm^3)		G369i KI	CAR Volume (µm^3)	GPR179 Volume (µm^3)
WT1	15.9666	0.74302		KI1	13.1766	1.62118
WT2	18.7771	0.694421		KI2	16.2547	1.05991
WT3	18.6118	0.69244		KI3	12.4685	1.30931
WT4	20.7855	0.474881		KI4	11.53	2.12211
WT5	18.1441	0.566292		KI5	19.1615	0.631043
WT6	16.7276	0.425214		KI6	15.9615	1.52687
WT7	17.7476	0.631193		KI7	15.9027	2.78027
WT8	17.6547	0.815388		KI8	16.4349	1.6908
WT9	22.4766	0.486612		KI9	15.9764	0.994402
WT10	16.2863	0.489355		KI10	5.93152	1.58675
WT11	18.2256	0.734793		KI11	17.8689	1.81635
WT12	18.8289	0.743934		KI12	18.4154	2.54473
mGluR6
WT	CAR Volume (µm^3)	mGluR6 Volume (µm^3)		G369i KI	CAR Volume (µm^3)	mGluR6 Volume (µm^3)
WT1	20.0175	1.56953		KI1	22.4506	5.18507
WT2	25.4818	2.30333		KI2	25.6264	3.00194
WT3	19.0371	1.53936		KI3	23.6074	3.9284
WT4	19.905	1.37574		KI4	27.0177	3.99947
WT5	20.9716	0.82133		KI5	21.9444	3.24601
WT6	17.4387	0.854466		KI6	36.6891	6.50482
WT7	24.2466	0.510989		KI7	21.4734	4.45287
WT8	17.433	0.721463		KI8	26.0575	2.03824
WT9	24.5844	1.08505		KI9	21.4019	3.22681
WT10	17.9173	0.793221		KI10	21.4624	19.2329
				KI11	21.036	4.2705
				KI12	29.2605	4.86056
				KI13	19.0718	3.63885
				KI14	16.7182	2.01242
				KI15	13.7345	1.42099
				KI16	17.3942	2.1557
TRPM1
WT	CAR Volume (µm^3)	TRPM1 Volume (µm^3)		G369i KI	CAR Volume (µm^3)	TRPM1 Volume (µm^3)
WT1	20.0175	1.49937		KI1	22.4506	3.35982
WT2	25.4818	1.99071		KI2	25.6264	2.43337
WT3	19.0371	1.81611		KI3	23.6074	3.31777
WT4	19.905	0.551438		KI4	27.0177	2.4681
WT5	20.9716	1.333		KI5	21.9444	2.28094
WT6	17.4387	1.32249		KI6	36.6891	4.50017
WT7	24.2466	1.01444		KI7	21.4734	1.90821
WT8	17.433	1.0654		KI8	26.0575	2.48913
WT9	24.5844	1.59924		KI9	21.4019	0.904742
WT10	17.9173	1.21965		KI10	21.4624	0.814017
				KI11	21.036	3.0865
				KI12	29.2605	2.78004
				KI13	19.0718	2.72223
				KI14	16.7182	1.66437
				KI15	13.7345	2.01402
				KI16	17.3942	1.67625

## Sheet: Fig. 6d
	WT GPR179 Volume (µm^3)	WT GPR179 Intensity			G369i KI GPR179 Volume (µm^3)	G369i KI GPR179 Intensity
WT1	0.74302	1094490		KI1	1.62118	574684
WT2	0.694421	1081893		KI2	1.05991	400183
WT3	0.69244	918304		KI3	1.30931	553950
WT4	0.474881	525780		KI4	2.12211	922849
WT5	0.566292	1217978		KI5	0.631043	242599
WT6	0.425214	802774		KI6	1.52687	647187
WT7	0.631193	238867		KI7	2.78027	1121891
WT8	0.815388	1869012		KI8	1.6908	570421
WT9	0.486612	780557		KI9	0.994402	353827
WT10	0.489355	807038		KI10	1.58675	526268
WT11	0.734793	1017281		KI11	1.81635	618912
WT12	0.743934	817386		KI12	2.54473	979030
	WT mGluR6 Volume (µm^3)	WT mGluR6 Intensity			G369i KI mGluR6 Volume (µm^3)	G369i KI mGluR6 Intensity
WT1	1.56953	8591710		KI1	5.18507	17863900
WT2	2.30333	7672430		KI2	3.00194	6936450
WT3	1.53936	8445460		KI3	3.9284	15524600
WT4	1.37574	5560720		KI4	3.99947	8600080
WT5	0.82133	4959000		KI5	3.24601	10486300
WT6	0.854466	3938830		KI6	6.50482	22757800
WT7	0.510989	5797360		KI7	4.45287	22369100
WT8	0.721463	6755450		KI8	2.03824	5584840
WT9	1.08505	6049830		KI9	3.22681	11808500
WT10	0.793221	6836060		KI10	19.2329	7049960
				KI11	4.2705	16135400
				KI12	4.86056	19463100
				KI13	3.63885	14285000
				KI14	2.01242	9015410
				KI15	1.42099	6221680
				KI16	2.1557	9720130
WT	WT TRPM1 Volume (µm^3)	G369i KI TRPM1 Intensity		G369i KI	G369i KI TRPM1 Volume (µm^3)	G369i KI TRPM1 Intensity
WT1	1.49937	6510310		KI1	3.35982	8967830
WT2	1.99071	6484890		KI2	2.43337	5415800
WT3	1.81611	8757600		KI3	3.31777	8820020
WT4	0.551438	2179550		KI4	2.4681	4901220
WT5	1.333	5654730		KI5	2.28094	5048890
WT6	1.32249	5219130		KI6	4.50017	11529900
WT7	1.01444	8156460		KI7	1.90821	5242090
WT8	1.0654	7623140		KI8	2.48913	5457830
WT9	1.59924	8751090		KI9	0.904742	2793080
WT10	1.21965	8281750		KI10	0.814017	2158790
				KI11	3.0865	8310840
				KI12	2.78004	7082570
				KI13	2.72223	7306380
				KI14	1.66437	4247540
				KI15	2.01402	4800320
				KI16	1.67625	4800320

## Sheet: Fig. 6e
	WT Pedicle Volume (µm^3)	WT CtBP2 Volume (µm^3)			G369i KI Pedicle Volume (µm^3)	G369i KI CtBP2 Volume (µm^3)
WT1	19.0827	0.495753		KI1	10.8001	1.07744
WT2	13.8581	0.419272		KI2	10.7385	0.748962
WT3	16.1233	0.53567		KI3	8.56569	1.13746
WT4	14.4012	0.6024		KI4	13.5037	1.69781
WT5	16.6152	0.724891		KI5	11.3645	1.13929
WT6	19.5963	0.0716968		KI6	10.429	0.718797
WT7	22.7923	0.882117		KI7	11.8437	0.922643
WT8	19.9036	0.61474		KI8	11.6753	0.860484
WT9	15.4043	0.752161		KI9	10.3229	0.881966
WT10	19.385	0.395811		KI10	11.0397	0.748048
WT11	18.5259	0.768159		KI11	11.6179	1.10882
WT12	18.5102	1.14904		KI12	10.9153	0.873434
WT13	24.2157	0.883527		KI13	17.2933	2.1474
WT14	26.4879	2.55799		KI14	17.8359	1.87225
WT15	19.0152	2.49019		KI15	37.2083	4.22975
WT16	15.3586	1.78267		KI16	30.9541	5.59072
WT17	41.1638	1.62392		KI17	27.016	4.15083
WT18	20.4848	1.62605		KI18	29.601	3.17166
WT19	20.4085	1.14645		KI19	23.8565	2.56515
WT20	17.6332	1.0008		KI20	15.174	2.48974
WT21	18.3211	1.82289		KI21	16.9878	2.83222
WT22	19.2995	1.71807		KI22	13.7086	1.95833
WT23	23.1211	2.48974		KI23	14.6553	2.44799
WT24	25.7652	2.58998		KI24	12.5754	2.86788

## Sheet: Fig. 6f
	WT Pedicle Volume (µm^3)	WT CaV1.4 Volume (µm^3)			G369i KI Pedicle Volume (µm^3)	G369i KI CaV1.4 Volume (µm^3)
WT1	19.0827	0.638659		KI1	10.8001	0.646125
WT2	13.8581	0.528508		KI2	10.7385	0.854238
WT3	16.1233	0.694878		KI3	8.56569	0.839308
WT4	14.4012	0.778214		KI4	13.5037	1.29057
WT5	16.6152	0.712855		KI5	11.3645	0.74683
WT6	19.5963	0.848449		KI6	10.429	0.573453
WT7	22.7923	0.530032		KI7	11.8437	0.86932
WT8	19.9036	0.500171		KI8	11.6753	0.996839
WT9	15.4043	0.410893		KI9	10.3229	0.668825
WT10	19.385	0.584728		KI10	11.0397	0.802742
WT11	18.5259	0.484784		KI11	11.6179	0.740126
WT12	18.5102	0.609865		KI12	10.9153	1.23344
WT13	11.7364	0.458579		KI13	15.7121	1.39006
WT14	13.4344	0.652828		KI14	12.6114	1.8782
WT15	16.3286	0.81615		KI15	13.6712	2.10429
WT16	19.8329	1.26498		KI16	11.8435	1.6617
WT17	17.6488	0.763893		KI17	12.0017	1.84376
WT18	17.8351	1.58324		KI18	15.8408	1.8622
WT19	14.155	1.15254		KI19	13.2144	2.30326
WT20	17.643	1.84574		KI20	16.7601	1.6716
WT21	15.8688	1.11994		KI21	12.2331	1.75265

## Sheet: Fig. 6g
	WT Pedicle Volume (µm^3)	WT Bassoon Volume (µm^3)			G369i KI Pedicle Volume (µm^3)	G369i KI Bassoon Volume (µm^3)
WT1	24.2157	0.636527		KI1	17.2933	0.753228
WT2	26.4879	0.978405		KI2	17.8359	1.80263
WT3	19.0152	1.00415		KI3	37.2083	2.8307
WT4	15.3586	0.733117		KI4	30.9541	4.23599
WT5	41.1638	1.0427		KI5	27.016	3.33392
WT6	20.4848	0.691526		KI6	29.601	4.42232
WT7	20.4085	0.830014		KI7	23.8565	3.25439
WT8	17.6332	0.928737		KI8	15.174	1.50966
WT9	18.3211	1.42601		KI9	16.9878	1.97418
WT10	19.2995	1.28707		KI10	13.7086	1.52215
WT11	23.1211	1.42693		KI11	14.6553	1.40164
WT12	25.7652	1.65424		KI12	12.5754	2.61543
WT13	15.9666	0.605295		KI13	13.1766	1.18119
WT14	18.7771	0.587621		KI14	16.2547	0.74561
WT15	18.6118	0.640945		KI15	12.4685	0.809903
WT16	20.7855	0.591126		KI16	11.53	0.798629
WT17	18.1441	0.634851		KI17	19.1615	0.92371
WT18	16.7276	0.637288		KI18	15.9615	0.624795
WT19	17.7476	0.698229		KI19	15.9027	0.437859
WT20	17.6547	0.772577		KI20	16.4349	0.715445
WT21	22.4766	0.649629		KI21	15.9764	0.872215
WT22	16.2863	0.609712		KI22	5.93152	0.81813
WT23	18.2256	0.727633		KI23	17.8689	1.17174
WT24	18.8289	0.926605		KI24	18.4154	0.666083
				KI25	17.2933	0.753228
				KI26	17.8359	1.80263
				KI27	37.2083	2.8307
				KI28	30.9541	4.23599
				KI29	27.016	3.33392
				KI30	29.601	4.42232
				KI31	23.8565	3.25439
				KI32	15.174	1.50966
				KI33	16.9878	1.97418
				KI34	13.7086	1.52215
				KI35	14.6553	1.40164
				KI36	12.5754	2.61543

## Sheet: Fig. 6h
	WT Pedicle Volume (µm^3)	WT mGluR6 Volume (µm^3)			G369i KI Pedicle Volume (µm^3)	G369i KI mGluR6 Volume (µm^3)
WT1	20.0175	1.56953		KI1	22.4506	5.18507
WT2	25.4818	2.30333		KI2	25.6264	3.00194
WT3	19.0371	1.53936		KI3	23.6074	3.9284
WT4	19.905	1.37574		KI4	27.0177	3.99947
WT5	20.9716	0.82133		KI5	21.9444	3.24601
WT6	17.4387	0.854466		KI6	36.6891	6.50482
WT7	24.2466	0.510989		KI7	21.4734	4.45287
WT8	17.433	0.721463		KI8	26.0575	2.03824
WT9	24.5844	1.08505		KI9	21.4019	3.22681
WT10	17.9173	0.793221		KI10	21.036	4.2705
				KI11	29.2605	4.86056
				KI12	19.0718	3.63885
				KI13	16.7182	2.01242
				KI14	13.7345	1.42099
				KI15	17.3942	2.1557

## Sheet: Fig. 6i
	WT Pedicle Volume (µm^3)	WT TRPM1 Volume (µm^3)			G369i KI Pedicle Volume (µm^3)	G369i KI TRPM1 Volume (µm^3)
WT1	20.0175	1.49937		KI1	22.4506	3.35982
WT2	25.4818	1.99071		KI2	25.6264	2.43337
WT3	19.0371	1.81611		KI3	23.6074	3.31777
WT4	19.905	0.551438		KI4	27.0177	2.4681
WT5	20.9716	1.333		KI5	21.9444	2.28094
WT6	17.4387	1.32249		KI6	36.6891	4.50017
WT7	24.2466	1.01444		KI7	21.4734	1.90821
WT8	17.433	1.0654		KI8	26.0575	2.48913
WT9	24.5844	1.59924		KI9	21.4019	0.904742
WT10	17.9173	1.21965		KI10	21.036	3.0865
				KI11	29.2605	2.78004
				KI12	19.0718	2.72223
				KI13	16.7182	1.66437
				KI14	13.7345	2.01402
				KI15	17.3942	1.67625
