# Supplementary material for: A non-conducting role of the Cav1.4 Ca2+ channel drives homeostatic plasticity at the cone photoreceptor synapse
Source: eLife. 2024 Nov 12;13:RP94908. doi: 10.7554/eLife.94908 (PMC11556788; doi:10.7554/eLife.94908)
Supplement: Figure 8—source data 1. [file elife-94908-fig8-data1.xlsx]

## Sheet: Fig.8a
WT											G369i KI											CaV1.4 KO
	Light Intensities (Φq/μm2)											Light Intensities (Φq/μm2)											Light Intensities (Φq/μm2)
	97.3756	194.751	389.503	779.005	1558.01	4674.03	10906.1	24149.2	42066.3			97.3756	194.751	389.503	779.005	1558.01	4674.03	10906.1	24149.2	42066.3			97.3756	194.751	389.503	779.005	1558.01	4674.03	10906.1	24149.2	42066.3
Time (s)	Light Responses (pA)										Time (s)	Light Responses (pA)										Time (s)	Light Responses (pA)
0	0.44173	0.58965	-1.79165	0.13467	0.13101	-2.20479	-1.3306	-0.27428	4.91879		0	-7.28431	-2.87953	0.164329	-1.40497	0.160088	-1.86495	3.66182	5.13113	1.2685		0	0.910561	-0.452114	1.47072	-0.147724	-0.696907	1.45437	2.239	0.21404	-1.11988
5e-05	0.44761	0.59654	-1.79741	0.1214	0.12283	-2.19925	-1.3321	-0.26931	4.92823		5e-05	-7.62754	-1.38178	-0.1165	-0.515681	0.784153	-2.50462	2.77253	4.16383	2.04858		5e-05	0.910561	-0.452115	1.47072	-0.147724	-0.696907	1.45437	2.239	0.214039	-1.11989
0.0001	0.45365	0.60332	-1.80295	0.10779	0.11458	-2.1934	-1.33369	-0.26454	4.93759		0.0001	-8.82887	-0.0400369	2.53578	0.170791	1.00258	-1.3813	3.17817	4.56947	2.89107		0.0001	0.910593	-0.452029	1.4706	-0.147743	-0.696932	1.45437	2.23902	0.214116	-1.11973
0.00015	0.45984	0.61001	-1.80828	0.09387	0.10625	-2.18722	-1.33534	-0.25997	4.94686		0.00015	-9.81177	-0.476883	5.12565	2.27701	0.706145	-3.17549	6.15808	3.77379	2.39182		0.00015	0.910658	-0.451854	1.47035	-0.147781	-0.696982	1.45438	2.23907	0.214273	-1.11943
0.0002	0.46621	0.61659	-1.8134	0.07962	0.09784	-2.18074	-1.33706	-0.25561	4.95603		0.0002	-8.1736	-0.539289	6.561	2.58904	0.222495	-3.51873	6.95377	0.825083	0.441613		0.0002	0.910756	-0.451591	1.46998	-0.147841	-0.697057	1.45438	2.23913	0.214507	-1.11898
0.00025	0.47275	0.62307	-1.8183	0.06507	0.08937	-2.17395	-1.33885	-0.25144	4.9651		0.00025	-6.16099	-0.570492	6.639	0.498425	-1.33767	-2.14578	5.73684	-1.49956	1.06568		0.00025	0.910886	-0.451241	1.46949	-0.147922	-0.697155	1.45439	2.23921	0.214818	-1.11837
0.0003	0.47946	0.62945	-1.82298	0.05021	0.08082	-2.16686	-1.34069	-0.24747	4.97406		0.0003	-4.74124	-1.25696	4.57959	0.763653	-2.99144	-1.84935	6.03327	-0.345039	1.65854		0.0003	0.911049	-0.450802	1.46887	-0.148025	-0.697278	1.4544	2.23931	0.215207	-1.11761
0.00035	0.48636	0.63573	-1.82745	0.03505	0.0722	-2.15947	-1.34259	-0.24369	4.98289		0.00035	-4.07037	-1.99024	0.195532	3.1663	-3.14746	-1.80255	6.11128	1.964	1.2529		0.00035	0.911242	-0.450278	1.46813	-0.14815	-0.697426	1.4544	2.23943	0.215671	-1.11669
0.0004	0.49345	0.6419	-1.83169	0.01959	0.06352	-2.15179	-1.34454	-0.24011	4.9916		0.0004	-5.73975	-3.5192	-2.48795	4.75767	-2.21136	-1.05367	3.25618	3.14973	2.2046		0.0004	0.911467	-0.449666	1.46727	-0.148296	-0.697598	1.45441	2.23956	0.216211	-1.11563
0.00045	0.50073	0.64796	-1.83571	0.00385	0.05477	-2.14381	-1.34653	-0.23672	5.00018		0.00045	-8.81327	-5.81264	0.445158	4.00879	-1.80572	0.568901	1.99245	3.00931	2.37622		0.00045	0.911722	-0.448968	1.46629	-0.148462	-0.697796	1.45441	2.23971	0.216826	-1.11441
0.0005	0.50821	0.65393	-1.83951	-0.01218	0.04596	-2.13555	-1.34857	-0.23353	5.00862		0.0005	-7.64314	-4.34609	2.723	2.29261	-3.17866	1.05255	4.27029	3.32134	1.81456		0.0005	0.912008	-0.448182	1.46518	-0.148647	-0.698017	1.4544	2.23987	0.217514	-1.11304
0.00055	0.51589	0.65978	-1.84308	-0.02848	0.03709	-2.127	-1.35064	-0.23052	5.01691		0.00055	-5.52132	-0.0400369	1.92731	0.498425	-3.64671	-1.20968	4.94116	6.05163	-0.712907		0.00055	0.912322	-0.447308	1.46396	-0.148851	-0.698263	1.4544	2.24005	0.218275	-1.11152
0.0006	0.52378	0.66554	-1.84642	-0.04505	0.02816	-2.11818	-1.35274	-0.22771	5.02505		0.0006	-2.16697	-0.289663	3.61229	2.32382	-3.06945	-2.86346	4.25469	6.44167	-2.89714		0.0006	0.912663	-0.446343	1.46262	-0.149075	-0.698531	1.45439	2.24025	0.21911	-1.10985
0.00065	0.53189	0.67119	-1.84954	-0.06188	0.01918	-2.10909	-1.35488	-0.22507	5.03303		0.00065	-2.18257	-2.66111	5.90573	4.83568	-1.18165	-2.81665	4.61352	6.48847	-2.91274		0.00065	0.913031	-0.445286	1.46115	-0.149318	-0.698822	1.45438	2.24046	0.220019	-1.10803
0.0007	0.54021	0.67673	-1.85243	-0.07897	0.01015	-2.09973	-1.35703	-0.22263	5.04084		0.0007	-2.82224	-4.81414	7.48149	3.63435	-1.02564	-1.77134	5.75244	6.44167	-3.00635		0.0007	0.913424	-0.444138	1.45957	-0.14958	-0.699136	1.45437	2.24069	0.221001	-1.10605
0.00075	0.54875	0.68217	-1.8551	-0.09631	0.00107	-2.09011	-1.3592	-0.22036	5.04848		0.00075	-4.11718	-3.94044	6.10855	1.85577	-2.96024	-1.02247	6.25169	4.14823	-4.66012		0.00075	0.913842	-0.442897	1.45787	-0.149861	-0.699474	1.45436	2.24094	0.222055	-1.10393
0.0008	0.55751	0.68751	-1.85753	-0.11389	-0.00806	-2.08023	-1.36138	-0.21827	5.05594		0.0008	-6.83186	0.225191	4.79801	0.0927829	-4.4892	-2.55142	5.75244	2.72848	-5.67423		0.0008	0.914281	-0.441563	1.45604	-0.15016	-0.699836	1.45435	2.2412	0.22318	-1.10165
0.00085	0.56651	0.69274	-1.85973	-0.13171	-0.01722	-2.0701	-1.36357	-0.21636	5.06322		0.00085	-11.3407	2.09739	4.43918	-0.344063	-3.24107	-2.73864	3.64622	1.71438	-4.80053		0.00085	0.914741	-0.440136	1.4541	-0.150479	-0.700224	1.45434	2.24148	0.224375	-1.09922
0.0009	0.57574	0.69787	-1.86171	-0.14975	-0.02642	-2.05973	-1.36577	-0.21462	5.07031		0.0009	-14.7107	-0.133647	1.8337	0.389214	-1.88373	-1.64653	0.947141	0.60666	-2.5851		0.0009	0.91522	-0.438617	1.45204	-0.150816	-0.700636	1.45433	2.24178	0.22564	-1.09664
0.00095	0.5852	0.70289	-1.86345	-0.16802	-0.03566	-2.04912	-1.36796	-0.21305	5.0772		0.00095	-11.3251	-0.882525	-1.42704	0.54523	-1.85252	-0.429603	-0.285388	0.123009	-0.0264354		0.00095	0.915719	-0.437006	1.44986	-0.151173	-0.701073	1.45433	2.24209	0.226974	-1.0939
0.001	0.59491	0.70782	-1.86496	-0.18651	-0.04493	-2.03828	-1.37015	-0.21164	5.08389		0.001	-7.87717	-0.695305	-2.75318	1.41892	-0.479578	1.19297	-0.0825669	1.24633	-0.525688		0.001	0.916235	-0.435303	1.44755	-0.151549	-0.701531	1.45432	2.24242	0.228379	-1.09102
0.00105	0.60486	0.71263	-1.86624	-0.2052	-0.05422	-2.02722	-1.37232	-0.2104	5.09037		0.00105	-6.2702	-0.25846	-2.26953	0.904068	-0.651196	2.69072	2.17967	3.75819	-2.41348		0.00105	0.916769	-0.433507	1.44513	-0.151944	-0.702013	1.45432	2.24276	0.229852	-1.08799
0.0011	0.61506	0.71735	-1.86729	-0.2241	-0.06354	-2.01593	-1.37448	-0.20932	5.09663		0.0011	-5.52132	0.0691745	-0.241314	0.264401	-1.25966	4.06367	2.27328	4.22624	-2.44469		0.0011	0.91732	-0.431619	1.44258	-0.152359	-0.702516	1.45432	2.24313	0.231394	-1.0848
0.00115	0.62551	0.72196	-1.8681	-0.24319	-0.07288	-2.00443	-1.37661	-0.2084	5.10268		0.00115	-5.20929	2.06618	0.445158	2.76066	-0.978831	3.79844	1.43079	4.67869	-2.28867		0.00115	0.917886	-0.429638	1.43991	-0.152793	-0.703039	1.45433	2.24351	0.233005	-1.08148
0.0012	0.63621	0.72648	-1.86869	-0.26247	-0.08223	-1.99273	-1.37872	-0.20763	5.1085		0.0012	-3.3995	2.31581	0.476361	5.45974	-2.66381	2.75313	0.806726	4.44466	-3.09996		0.0012	0.918466	-0.427564	1.43711	-0.153246	-0.703581	1.45434	2.2439	0.234686	-1.078
0.00125	0.64717	0.73089	-1.86904	-0.28192	-0.09159	-1.98083	-1.3808	-0.20701	5.11409		0.00125	-1.41809	1.73855	2.02092	3.85278	-4.27077	2.25388	2.55411	5.13113	-1.08735		0.00125	0.919059	-0.425399	1.4342	-0.153718	-0.704141	1.45435	2.24431	0.236434	-1.07439
0.0013	0.65839	0.7352	-1.86916	-0.30155	-0.10095	-1.96873	-1.38284	-0.20653	5.11945		0.0013	-2.91585	0.490418	2.7542	0.576433	-3.36588	4.20408	4.92556	4.21064	0.472817		0.0013	0.919667	-0.42314	1.43116	-0.154208	-0.704719	1.45437	2.24473	0.238251	-1.07064
0.00135	0.66987	0.73941	-1.86906	-0.32134	-0.11032	-1.95646	-1.38484	-0.2062	5.12456		0.00135	-5.88016	-0.336468	3.44067	-0.484477	-6.11177	5.60823	7.00057	1.60516	-1.36818		0.00135	0.920287	-0.420789	1.428	-0.154715	-0.705313	1.4544	2.24517	0.240137	-1.06674
0.0014	0.68161	0.74352	-1.86872	-0.34129	-0.11969	-1.944	-1.38679	-0.206	5.12943		0.0014	-7.47153	-1.24136	5.87453	0.654442	-8.10878	4.11047	8.07708	2.55686	-3.09996		0.0014	0.920918	-0.418347	1.42473	-0.155238	-0.705923	1.45444	2.24562	0.24209	-1.06271
0.00145	0.69362	0.74753	-1.86815	-0.36139	-0.12904	-1.93138	-1.38869	-0.20594	5.13404		0.00145	-7.47153	-1.14775	6.37378	1.98058	-5.95575	3.17437	5.17518	5.02192	-2.61631		0.00145	0.921559	-0.415816	1.42134	-0.155777	-0.706548	1.45449	2.24609	0.244108	-1.05855
0.0015	0.7059	0.75144	-1.86735	-0.38164	-0.13839	-1.9186	-1.39054	-0.206	5.13841		0.0015	-4.95966	-0.695305	5.34407	0.233198	-3.27227	3.97006	3.4278	5.02192	-1.94544		0.0015	0.92221	-0.413195	1.41782	-0.156331	-0.707187	1.45455	2.24657	0.246191	-1.05425
0.00155	0.71845	0.75526	-1.86633	-0.40201	-0.14772	-1.90566	-1.39232	-0.20619	5.14251		0.00155	-4.3668	-2.31787	2.28615	-0.7029	-2.617	4.28209	2.02365	4.77229	-1.77382		0.00155	0.922869	-0.410484	1.4142	-0.156902	-0.70784	1.45462	2.24707	0.248338	-1.04982
0.0016	0.73127	0.75898	-1.86507	-0.42251	-0.15702	-1.89257	-1.39404	-0.2065	5.14634		0.0016	-4.83485	-1.66261	2.05213	-1.82622	-0.963229	3.50201	1.85204	3.58657	-1.30577		0.0016	0.923534	-0.407683	1.41046	-0.157488	-0.708506	1.45471	2.24758	0.250549	-1.04526
0.00165	0.74436	0.7626	-1.8636	-0.44314	-0.1663	-1.87935	-1.39569	-0.20692	5.14991		0.00165	-5.58373	1.20809	3.47187	-0.687299	-0.40157	3.48641	3.80224	4.24184	-0.0108338		0.00165	0.924205	-0.404792	1.4066	-0.158089	-0.709184	1.45482	2.2481	0.252823	-1.04058
0.0017	0.75773	0.76613	-1.86189	-0.46387	-0.17554	-1.866	-1.39726	-0.20745	5.1532		0.0017	-5.69294	2.17539	3.39387	0.482824	-0.963229	3.82964	5.3624	6.22325	1.08128		0.0017	0.924879	-0.401813	1.40263	-0.158703	-0.709873	1.45494	2.24863	0.255161	-1.03577
0.00175	0.77137	0.76956	-1.85996	-0.4847	-0.18475	-1.85253	-1.39875	-0.20809	5.15621		0.00175	-4.11718	3.39232	1.11603	2.23021	-0.40157	2.09786	3.73983	5.31835	1.40891		0.00175	0.925554	-0.398746	1.39855	-0.15933	-0.710572	1.45508	2.24917	0.25756	-1.03084
0.0018	0.78529	0.77291	-1.85781	-0.50564	-0.19391	-1.83894	-1.40016	-0.20883	5.15894		0.0018	-1.4649	4.62485	2.28615	1.45012	-2.02414	0.17886	2.33569	2.46325	-1.30577		0.0018	0.926229	-0.39559	1.39436	-0.159969	-0.71128	1.45523	2.24971	0.260021	-1.0258
0.00185	0.79949	0.77615	-1.85543	-0.52665	-0.20303	-1.82525	-1.40147	-0.20966	5.16138		0.00185	-0.856436	4.35962	2.36416	-2.18505	-3.5219	0.241267	3.02216	2.21363	-4.61331		0.00185	0.926901	-0.392347	1.39005	-0.16062	-0.711996	1.45541	2.25027	0.262542	-1.02064
0.0019	0.81397	0.77931	-1.85284	-0.54775	-0.21209	-1.81146	-1.40269	-0.21058	5.16354		0.0019	-3.07187	2.50303	2.723	-0.546884	-3.75592	1.62981	1.29038	1.71438	-7.70244		0.0019	0.92757	-0.389019	1.38563	-0.161281	-0.712719	1.4556	2.25083	0.265121	-1.01537
0.00195	0.82872	0.78238	-1.85002	-0.56892	-0.22109	-1.79759	-1.40381	-0.21158	5.16539		0.00195	-4.99087	0.708841	2.53578	0.342409	-2.44538	1.38019	0.0578477	2.49446	-5.68983		0.00195	0.928234	-0.385607	1.3811	-0.161954	-0.713451	1.45581	2.2514	0.267759	-1.01
0.002	0.84375	0.78536	-1.84699	-0.59016	-0.23002	-1.78363	-1.40482	-0.21266	5.16695		0.002	-4.91286	0.428012	3.30026	-1.06174	-2.80422	-1.3969	0.884734	4.11703	-1.30577		0.002	0.928892	-0.382109	1.37646	-0.162638	-0.714189	1.45604	2.25197	0.270452	-1.00452
0.00205	0.85906	0.78825	-1.84374	-0.61144	-0.23889	-1.76961	-1.40573	-0.21382	5.16821		0.00205	-5.38091	0.50602	5.17245	-1.06174	-3.47509	-1.24089	1.68042	4.17943	-0.416476		0.00205	0.929542	-0.378528	1.37171	-0.163333	-0.714935	1.4563	2.25255	0.273201	-0.998946
0.0021	0.87465	0.79105	-1.84027	-0.63278	-0.24767	-1.75553	-1.40652	-0.21504	5.16916		0.0021	-7.83036	1.62934	5.04764	-0.578087	-3.19426	-0.788441	1.85204	5.31835	-1.39938		0.0021	0.930185	-0.374863	1.36686	-0.164038	-0.715689	1.45657	2.25314	0.276004	-0.993272
0.00215	0.89052	0.79377	-1.83659	-0.65416	-0.25637	-1.74139	-1.40719	-0.21633	5.16981		0.00215	-4.56962	2.54983	4.45478	0.670043	-1.77451	-3.72155	1.08756	7.03453	-0.556891		0.00215	0.930818	-0.371116	1.36189	-0.164752	-0.716449	1.45686	2.25373	0.278861	-0.987501
0.0022	0.90667	0.7964	-1.8327	-0.67557	-0.26498	-1.7272	-1.40773	-0.21767	5.17014		0.0022	-2.4322	3.62635	4.642	2.69825	-1.6809	-3.22229	2.36689	6.30125	-0.775314		0.0022	0.931442	-0.367288	1.35682	-0.165475	-0.717216	1.45717	2.25434	0.28177	-0.981641
0.00225	0.92309	0.79894	-1.82861	-0.697	-0.2735	-1.71299	-1.40815	-0.21906	5.17015		0.00225	-2.74423	2.50303	4.53278	1.79336	-1.22846	-2.23939	3.34979	5.05312	-3.49		0.00225	0.932053	-0.363382	1.35165	-0.166204	-0.71799	1.4575	2.25496	0.284728	-0.975691
0.0023	0.93979	0.80141	-1.8243	-0.71845	-0.28192	-1.69874	-1.40844	-0.2205	5.16985		0.0023	-4.44481	1.19249	2.801	2.27701	-1.08804	-1.20968	1.24357	3.05612	-5.36219		0.0023	0.932652	-0.359398	1.34637	-0.166941	-0.718769	1.45785	2.25558	0.287736	-0.969654
0.00235	0.95676	0.80379	-1.81979	-0.7399	-0.29022	-1.68449	-1.40859	-0.22198	5.16923		0.00235	-6.78505	2.2378	1.27204	2.91668	-1.35327	-0.538815	-1.09667	2.12002	-5.19057		0.00235	0.933233	-0.355335	1.34099	-0.167685	-0.719553	1.45822	2.25623	0.290788	-0.963534
0.0024	0.97401	0.80609	-1.81507	-0.76135	-0.29842	-1.67022	-1.4086	-0.22348	5.16828		0.0024	-6.16099	4.42203	0.928809	1.74656	-0.604392	-1.45931	-1.87675	3.18093	-4.84734		0.0024	0.933797	-0.351196	1.33551	-0.168435	-0.720341	1.45861	2.25688	0.293886	-0.957334
0.00245	0.99153	0.80832	-1.81015	-0.7828	-0.30649	-1.65595	-1.40846	-0.22502	5.16701		0.00245	-3.78954	4.78087	2.36416	1.40332	-1.15045	-1.98977	-1.3307	4.8191	-5.28418		0.00245	0.934342	-0.346979	1.32994	-0.169192	-0.72113	1.45902	2.25755	0.297026	-0.951054
0.0025	1.00931	0.81046	-1.80504	-0.80423	-0.31443	-1.6417	-1.40818	-0.22657	5.1654		0.0025	-4.19518	3.40792	1.67769	2.51104	-1.93053	-0.601221	0.104653	4.77229	-6.56352		0.0025	0.934868	-0.342686	1.32426	-0.169955	-0.721922	1.45944	2.25823	0.300208	-0.944696
0.00255	1.02737	0.81253	-1.79972	-0.82564	-0.32224	-1.62746	-1.40774	-0.22814	5.16347		0.00255	-5.91136	2.65904	-2.56596	0.295604	-3.38148	-1.10047	-0.644226	1.63637	-8.60733		0.00255	0.935375	-0.338318	1.31849	-0.170724	-0.722717	1.45989	2.25892	0.303431	-0.938262
0.0026	1.0457	0.81452	-1.79421	-0.84701	-0.32992	-1.61326	-1.40714	-0.22972	5.1612		0.0026	-6.97227	1.81656	-2.45674	-3.47999	-2.46099	-2.69184	-4.43542	2.05761	-10.0271		0.0026	0.935864	-0.333876	1.31263	-0.171498	-0.723515	1.46036	2.25963	0.306691	-0.931753
0.00265	1.06429	0.81644	-1.78851	-0.86834	-0.33744	-1.59909	-1.40638	-0.2313	5.1586		0.00265	-6.95667	0.927264	1.10043	-4.16646	-1.22846	-1.03807	-5.24671	3.58657	-8.51372		0.00265	0.936334	-0.329361	1.30667	-0.172274	-0.724315	1.46085	2.26036	0.309987	-0.925172
0.0027	1.08314	0.81829	-1.78262	-0.88963	-0.34481	-1.58497	-1.40545	-0.23288	5.15565		0.0027	-6.20779	0.50602	1.72449	-1.01493	-1.80572	1.31778	-4.15459	2.54126	-6.61032		0.0027	0.936786	-0.324776	1.30063	-0.173052	-0.725119	1.46136	2.2611	0.313317	-0.91852
0.00275	1.10225	0.82007	-1.77654	-0.91085	-0.35203	-1.57091	-1.40435	-0.23444	5.15237		0.00275	-5.95817	0.459215	-0.054094	1.98058	-3.50629	3.4084	-5.66795	2.75968	-7.29679		0.00275	0.93722	-0.320121	1.29449	-0.17383	-0.725928	1.46189	2.26186	0.31668	-0.911799
0.0028	1.12162	0.82177	-1.77027	-0.93202	-0.35907	-1.55691	-1.40308	-0.23599	5.14875		0.0028	-5.06888	-1.49099	-0.225712	3.93078	-0.49518	3.09636	-7.30612	4.99072	-8.17049		0.0028	0.937633	-0.315399	1.28827	-0.174607	-0.72674	1.46243	2.26264	0.320074	-0.905013
0.00285	1.14124	0.82341	-1.76382	-0.95311	-0.36595	-1.54299	-1.40163	-0.23752	5.14478		0.00285	-7.03468	-0.180452	1.31885	4.41443	1.67345	2.06666	-7.04089	5.22474	-8.04567		0.00285	0.938024	-0.310613	1.28197	-0.175383	-0.727555	1.463	2.26343	0.3235	-0.898161
0.0029	1.16111	0.82498	-1.7572	-0.97413	-0.37264	-1.52915	-1.4	-0.23902	5.14046		0.0029	-8.45443	0.50602	1.70889	1.2005	1.14299	0.288072	-3.46812	4.42906	-8.87256		0.0029	0.938397	-0.305764	1.27557	-0.176158	-0.728372	1.4636	2.26424	0.326956	-0.891247
0.00295	1.18123	0.82648	-1.75039	-0.99505	-0.37915	-1.5154	-1.39819	-0.24048	5.1358		0.00295	-7.98638	0.428012	0.195532	-2.46588	-0.198749	-0.101969	-0.628624	4.02342	-11.1192		0.00295	0.938751	-0.300855	1.2691	-0.176931	-0.729191	1.46421	2.26507	0.33044	-0.884275
0.003	1.20159	0.82792	-1.74341	-1.01588	-0.38546	-1.50176	-1.39618	-0.2419	5.1308		0.003	-7.45592	2.30021	-0.350525	-4.72812	-0.432774	0.36608	-0.581819	4.67869	-12.7106		0.003	0.939085	-0.295886	1.26253	-0.177703	-0.73001	1.46484	2.26593	0.333953	-0.877246
0.00305	1.22219	0.8293	-1.73626	-1.03661	-0.39158	-1.48823	-1.39398	-0.24327	5.12544		0.00305	-8.06439	3.86037	1.44366	-2.91833	-1.55609	1.00575	-1.73634	3.08732	-13.163		0.00305	0.939399	-0.290861	1.25589	-0.178473	-0.730833	1.4655	2.2668	0.337494	-0.870164
0.0031	1.24303	0.83062	-1.72894	-1.05723	-0.39749	-1.47482	-1.39159	-0.24459	5.11973		0.0031	-7.44032	3.09589	2.62939	-0.936925	-2.83542	0.27247	-5.71475	4.64748	-11.9305		0.0031	0.939694	-0.285779	1.24917	-0.179241	-0.731658	1.46618	2.26769	0.341064	-0.86303
0.00315	1.2641	0.83187	-1.72145	-1.07773	-0.40318	-1.46154	-1.389	-0.24584	5.11367		0.00315	-5.44331	2.67465	1.47487	-1.24896	-2.94464	-0.601221	-8.80388	4.24184	-10.2923		0.00315	0.939968	-0.280644	1.24236	-0.180008	-0.732487	1.46687	2.26861	0.344661	-0.855847
0.0032	1.2854	0.83307	-1.7138	-1.09811	-0.40866	-1.4484	-1.38621	-0.24703	5.10726		0.0032	-3.85195	0.443614	1.42806	-2.55949	-2.11775	0.678112	-9.45915	0.809481	-10.6979		0.0032	0.940222	-0.275456	1.23547	-0.180772	-0.733318	1.46759	2.26954	0.348285	-0.848617
0.00325	1.30692	0.83421	-1.70598	-1.11835	-0.4139	-1.4354	-1.38321	-0.24815	5.1005		0.00325	-1.66772	-0.92933	1.50607	-2.79352	-2.94464	-0.00835935	-10.7229	-0.813088	-10.9476		0.00325	0.940454	-0.270215	1.22851	-0.181533	-0.734151	1.46833	2.27051	0.351934	-0.841344
0.0033	1.32866	0.83529	-1.69801	-1.13845	-0.41892	-1.42257	-1.38	-0.24919	5.09338		0.0033	-2.79104	-1.05414	1.7869	-2.6375	-2.39858	-4.39242	-10.1768	1.48035	-11.3064		0.0033	0.94066	-0.264926	1.22146	-0.182292	-0.734986	1.46909	2.27149	0.355609	-0.834029
0.00335	1.35061	0.83632	-1.68989	-1.15841	-0.42369	-1.40989	-1.37658	-0.25013	5.08591		0.00335	-3.3839	0.911662	1.8493	-3.83883	-1.19725	-5.54694	-11.6746	6.00482	-8.2641		0.00335	0.940841	-0.25959	1.21434	-0.183049	-0.735823	1.46986	2.2725	0.359308	-0.826676
0.0034	1.37277	0.8373	-1.68161	-1.17821	-0.42822	-1.3974	-1.37295	-0.25099	5.07809		0.0034	-3.52431	2.86187	2.02092	-4.04165	-1.77451	-2.3486	-13.9992	5.30275	-6.32949		0.0034	0.940993	-0.25421	1.20715	-0.183804	-0.736664	1.47065	2.27353	0.363032	-0.819286
0.00345	1.39514	0.83823	-1.67318	-1.19785	-0.43249	-1.38508	-1.3691	-0.25175	5.06991		0.00345	-4.95966	3.48593	3.92432	-1.7014	-1.13485	-1.08487	-12.5327	1.87039	-7.82725		0.00345	0.941118	-0.248787	1.19988	-0.184559	-0.737509	1.47147	2.27459	0.366782	-0.811864
0.0035	1.4177	0.8391	-1.66461	-1.21732	-0.4365	-1.37296	-1.36503	-0.25241	5.06137		0.0035	-6.59784	2.42502	4.61079	2.1366	0.75295	-0.460807	-9.45915	1.9796	-7.60883		0.0035	0.941212	-0.243326	1.19253	-0.185313	-0.738358	1.4723	2.27567	0.370558	-0.80441
0.00355	1.44046	0.83993	-1.65589	-1.23662	-0.44025	-1.36103	-1.36074	-0.25295	5.05248		0.00355	-6.61344	2.44062	2.94142	2.80747	-0.307961	2.25388	-7.47774	3.08732	-8.74775		0.00355	0.941278	-0.237827	1.18512	-0.186068	-0.739212	1.47316	2.27678	0.374359	-0.796929
0.0036	1.4634	0.84072	-1.64703	-1.25573	-0.44372	-1.34931	-1.35623	-0.25338	5.04324		0.0036	-4.17958	2.14419	3.84631	0.73245	-1.74331	3.4396	-6.99409	1.85479	-8.87256		0.0036	0.941313	-0.232293	1.17763	-0.186824	-0.740071	1.47403	2.27792	0.378185	-0.789423
0.00365	1.48653	0.84145	-1.63804	-1.27465	-0.44691	-1.33781	-1.35149	-0.25368	5.03364		0.00365	-3.69593	1.44212	4.45478	-0.172445	-1.77451	1.11496	-8.69467	0.138611	-8.68534		0.00365	0.941318	-0.226725	1.17006	-0.187579	-0.740937	1.47492	2.27909	0.382035	-0.781896
0.0037	1.50983	0.84215	-1.62891	-1.29338	-0.44981	-1.32654	-1.34652	-0.25386	5.02369		0.0037	-4.24199	0.459215	2.7854	-0.437672	-0.526383	0.600104	-9.47475	0.856286	-10.4639		0.0037	0.941292	-0.221127	1.16243	-0.188333	-0.74181	1.47584	2.28028	0.385908	-0.774349
0.00375	1.5333	0.8428	-1.61965	-1.3119	-0.45242	-1.31549	-1.34132	-0.2539	5.01338		0.00375	-5.13128	1.89457	3.61229	-2.90273	-0.0427329	0.319275	-10.6761	0.809481	-11.8057		0.00375	0.941235	-0.215499	1.15473	-0.189086	-0.74269	1.47677	2.28149	0.389804	-0.766787
0.0038	1.55693	0.84342	-1.61026	-1.33022	-0.45473	-1.30469	-1.33588	-0.2538	5.00272		0.0038	-2.24498	3.37672	3.44067	-3.08995	-1.88373	0.490893	-13.6872	1.40234	-11.1192		0.0038	0.941146	-0.209844	1.14695	-0.189838	-0.743578	1.47772	2.28273	0.393723	-0.75921
0.00385	1.58072	0.84399	-1.60074	-1.34832	-0.45673	-1.29414	-1.33021	-0.25355	4.99171		0.00385	-1.15287	3.06469	3.44067	-1.37377	-0.541985	-0.3984	-13.4064	2.99371	-8.66974		0.00385	0.941023	-0.204163	1.1391	-0.19059	-0.744472	1.47869	2.28399	0.397664	-0.751622
0.0039	1.60466	0.84453	-1.59111	-1.3662	-0.45842	-1.28384	-1.32431	-0.25316	4.98034		0.0039	-1.32448	2.09739	2.53578	0.404815	2.03228	-0.788441	-11.1441	3.00931	-7.98327		0.0039	0.940865	-0.19846	1.13119	-0.191342	-0.745373	1.47968	2.28528	0.401626	-0.744026
0.00395	1.62874	0.84503	-1.58135	-1.38384	-0.45979	-1.2738	-1.31817	-0.2526	4.96863		0.00395	-2.29179	4.32842	2.23935	-0.344063	3.03079	-1.08487	-9.61516	2.15122	-8.35771		0.00395	0.940672	-0.192734	1.12321	-0.192095	-0.746281	1.48069	2.2866	0.405608	-0.736423
0.004	1.65296	0.8455	-1.57148	-1.40126	-0.46084	-1.26404	-1.31179	-0.25188	4.95656		0.004	-3.46191	6.26302	3.86191	0.701246	2.37552	-1.45931	-10.6605	1.9796	-9.77745		0.004	0.940444	-0.186986	1.11515	-0.192848	-0.747197	1.48171	2.28793	0.409608	-0.728819
0.00405	1.67731	0.84594	-1.5615	-1.41843	-0.46155	-1.25455	-1.30516	-0.251	4.94415		0.00405	-3.05627	4.67166	4.14274	2.94788	1.1898	0.132055	-12.5171	2.18242	-9.65264		0.00405	0.940176	-0.181219	1.10703	-0.193601	-0.74812	1.48275	2.28929	0.413626	-0.721212
0.0041	1.70178	0.84634	-1.55141	-1.43536	-0.46192	-1.24535	-1.2983	-0.24993	4.93138		0.0041	-2.58822	4.03199	3.40947	3.18191	0.550129	0.834129	-9.56836	4.36665	-9.43422		0.0041	0.939871	-0.175431	1.09884	-0.194354	-0.749049	1.48382	2.29068	0.41766	-0.713607
0.00415	1.72636	0.84672	-1.54121	-1.45203	-0.46196	-1.23645	-1.29119	-0.24869	4.91828		0.00415	-2.47901	2.58104	2.70739	2.24581	-0.541985	3.17437	-6.77567	4.61628	-10.3235		0.00415	0.939526	-0.169625	1.09058	-0.195106	-0.749986	1.4849	2.29209	0.421712	-0.706005
0.0042	1.75106	0.84707	-1.53091	-1.46845	-0.46164	-1.22784	-1.28384	-0.24727	4.90482		0.0042	-1.32448	-1.17896	3.64349	-0.328461	-0.0271312	4.96856	-7.77417	4.31985	-9.98027		0.0042	0.939142	-0.163802	1.08226	-0.195858	-0.75093	1.48601	2.29353	0.42578	-0.698411
0.00425	1.77585	0.8474	-1.5205	-1.4846	-0.46096	-1.21954	-1.27624	-0.24565	4.89103		0.00425	-1.79253	-4.54891	4.76681	-2.04464	0.94017	4.62532	-8.69467	2.35404	-9.02858		0.00425	0.938718	-0.157963	1.07387	-0.19661	-0.75188	1.48714	2.29499	0.429862	-0.690823
0.0043	1.80073	0.8477	-1.51	-1.50048	-0.45993	-1.21155	-1.2684	-0.24385	4.87689		0.0043	-2.66622	-4.04966	2.7386	1.1849	-2.21136	2.70632	-7.33732	1.9016	-8.74775		0.0043	0.938252	-0.15211	1.06543	-0.197362	-0.752836	1.48828	2.29648	0.433956	-0.683247
0.00435	1.8257	0.84798	-1.4994	-1.51609	-0.45852	-1.20388	-1.26031	-0.24184	4.86241		0.00435	-0.638013	-1.84983	1.58408	4.0556	-5.14447	0.974543	-6.1516	2.9313	-7.85845		0.00435	0.937743	-0.146245	1.05692	-0.198112	-0.753795	1.48945	2.29799	0.438061	-0.675685
0.0044	1.85075	0.84824	-1.48872	-1.53142	-0.45675	-1.19654	-1.25197	-0.23962	4.84759		0.0044	-1.16847	-1.11655	2.7386	4.60165	-1.93053	1.13056	-4.63824	2.47886	-7.03157		0.0044	0.93719	-0.14037	1.04835	-0.198861	-0.754758	1.49064	2.29953	0.442175	-0.668138
0.00445	1.87586	0.84847	-1.47794	-1.54646	-0.45459	-1.18953	-1.24339	-0.2372	4.83244		0.00445	-1.85494	0.833654	2.801	4.99169	1.95428	0.927738	-3.39011	2.51006	-7.51522		0.00445	0.936593	-0.134488	1.03973	-0.199608	-0.755724	1.49185	2.30109	0.446295	-0.660607
0.0045	1.90103	0.8487	-1.46708	-1.56122	-0.45205	-1.18286	-1.23455	-0.23457	4.81695		0.0045	-4.3044	2.191	1.88051	3.69676	4.43493	-0.788441	-3.3121	4.55387	-7.98327		0.0045	0.935951	-0.1286	1.03105	-0.200353	-0.756689	1.49309	2.30268	0.450418	-0.653095
0.00455	1.92626	0.8489	-1.45613	-1.57568	-0.44913	-1.17653	-1.22547	-0.23171	4.80113		0.00455	-6.12979	2.92427	1.94291	2.49543	3.31162	-0.0551642	-4.52903	4.55387	-7.59323		0.00455	0.935263	-0.122708	1.02231	-0.201095	-0.757656	1.49434	2.30429	0.454545	-0.645601
0.0046	1.95153	0.84909	-1.44511	-1.58984	-0.4458	-1.17055	-1.21614	-0.22864	4.78499		0.0046	-4.22639	2.54983	2.723	1.48133	-0.151944	0.27247	-6.97849	4.11703	-7.00036		0.0046	0.934529	-0.116814	1.01353	-0.201832	-0.75862	1.49562	2.30592	0.45867	-0.63813
0.00465	1.97683	0.84927	-1.43401	-1.60369	-0.44208	-1.16492	-1.20657	-0.22534	4.76851		0.00465	-2.26058	-0.679704	2.86341	0.794856	1.29901	1.11496	-7.43093	3.61777	-7.90526		0.00465	0.933751	-0.110921	1.00468	-0.202563	-0.759582	1.49693	2.30757	0.46279	-0.630679
0.0047	2.00216	0.84944	-1.42283	-1.61724	-0.43796	-1.15965	-1.19674	-0.22181	4.75171		0.0047	-2.68183	-1.80302	1.16283	0.389214	3.98249	1.44259	-6.08919	3.77379	-8.38891		0.0047	0.932925	-0.105029	0.995788	-0.203286	-0.76054	1.49825	2.30925	0.466905	-0.623251
0.00475	2.02751	0.8496	-1.41158	-1.63047	-0.43342	-1.15475	-1.18667	-0.21804	4.73459		0.00475	-4.19518	-1.53779	0.320345	0.108385	1.09619	0.506494	-8.38263	2.33844	-6.82875		0.00475	0.932051	-0.0991409	0.986841	-0.204	-0.761492	1.4996	2.31094	0.471012	-0.615847
0.0048	2.05286	0.84975	-1.40027	-1.64339	-0.42848	-1.15022	-1.17635	-0.21404	4.71715		0.0048	-4.74124	-1.69381	1.03802	-0.203648	-1.25966	0.17886	-8.80388	3.08732	-2.77232		0.0048	0.931129	-0.0932581	0.977844	-0.204706	-0.762436	1.50097	2.31265	0.475108	-0.608467
0.00485	2.07822	0.8499	-1.38888	-1.65599	-0.42311	-1.14606	-1.16578	-0.20979	4.69939		0.00485	-4.92846	-0.601696	1.38126	-1.28016	0.409714	0.896535	-7.0721	3.19653	0.582028		0.00485	0.930157	-0.0873827	0.968798	-0.205402	-0.763371	1.50237	2.31439	0.479192	-0.601114
0.0049	2.10356	0.85004	-1.37744	-1.66826	-0.41732	-1.14228	-1.15497	-0.2053	4.68132		0.0049	-5.17809	2.2066	2.28615	-1.98223	3.63925	2.67512	-6.94728	2.26043	-0.0732403		0.0049	0.929135	-0.0815151	0.959704	-0.20609	-0.764297	1.5038	2.31613	0.483262	-0.593789
0.00495	2.12889	0.85018	-1.36593	-1.6802	-0.4111	-1.13888	-1.14392	-0.20056	4.66293		0.00495	-4.56962	3.78236	2.84781	-1.98223	3.77967	1.30218	-7.46214	2.27603	-1.11855		0.00495	0.928061	-0.0756577	0.950562	-0.206769	-0.765212	1.50525	2.3179	0.487314	-0.586494
0.005	2.15419	0.85031	-1.35437	-1.69181	-0.40446	-1.13587	-1.13262	-0.19557	4.64424		0.005	-3.60232	4.31282	0.772792	-0.936925	1.57984	-0.3984	-6.47923	3.47736	-0.712907		0.005	0.926937	-0.0698116	0.941376	-0.207439	-0.766118	1.50674	2.31968	0.491345	-0.579229
0.00505	2.17946	0.85045	-1.34275	-1.70309	-0.39738	-1.13325	-1.12108	-0.19033	4.62525		0.00505	-2.54141	3.53274	2.83221	1.84017	0.206893	-2.19259	-3.68654	4.35105	-1.99224		0.00505	0.92576	-0.0639786	0.932144	-0.208097	-0.76701	1.50826	2.32147	0.495356	-0.571995
0.0051	2.20467	0.85059	-1.33108	-1.71403	-0.38985	-1.13102	-1.10929	-0.18482	4.60595		0.0051	-3.3683	1.19249	6.26457	3.07269	0.877763	-4.45482	-1.62713	4.52267	-2.80353		0.0051	0.924531	-0.05816	0.922868	-0.208742	-0.767891	1.5098	2.32327	0.499342	-0.564795
0.00515	2.22984	0.85074	-1.31936	-1.72462	-0.38189	-1.1292	-1.09727	-0.17906	4.58635		0.00515	-1.99535	2.28461	6.73261	3.60315	2.50033	-2.97267	-3.65534	4.7879	-3.05315		0.00515	0.923251	-0.0523577	0.913547	-0.209372	-0.76876	1.51138	2.32509	0.503303	-0.557627
0.0052	2.25493	0.85089	-1.30759	-1.73487	-0.37348	-1.12777	-1.08501	-0.17303	4.56646		0.0052	-3.29029	4.35962	4.09594	2.72946	1.81386	-2.333	-5.94878	4.42906	-3.5524		0.0052	0.921917	-0.0465729	0.904183	-0.209986	-0.769612	1.51298	2.32691	0.507238	-0.550497
0.00525	2.27996	0.85104	-1.29577	-1.74477	-0.36462	-1.12674	-1.07251	-0.16674	4.54628		0.00525	-5.38091	5.29572	1.74009	2.93228	-1.16605	-4.06478	-6.57284	5.58358	-4.87854		0.00525	0.920533	-0.0408062	0.894773	-0.210582	-0.770447	1.51462	2.32874	0.511146	-0.543404
0.0053	2.3049	0.85121	-1.28391	-1.75432	-0.35531	-1.12612	-1.05978	-0.16019	4.52581		0.0053	-4.92846	4.90568	-0.49094	1.43452	-2.13335	-4.73565	-8.42944	6.87851	-5.64302		0.0053	0.919095	-0.0350589	0.885318	-0.211162	-0.771264	1.51628	2.33057	0.515024	-0.536348
0.00535	2.32975	0.85138	-1.27202	-1.76352	-0.34554	-1.12592	-1.04682	-0.15336	4.50506		0.00535	-4.17958	3.08029	1.67769	-1.42058	1.86067	-3.90877	-8.38263	5.52117	-5.4558		0.00535	0.917606	-0.0293315	0.875822	-0.211724	-0.772061	1.51797	2.33241	0.518873	-0.529331
0.0054	2.35449	0.85157	-1.26008	-1.77236	-0.33532	-1.12612	-1.03362	-0.14626	4.48402		0.0054	-3.99236	4.50004	3.7527	-5.92945	5.33983	-2.44221	-6.94728	2.75968	-3.69282		0.0054	0.916062	-0.0236253	0.866281	-0.212269	-0.772838	1.51969	2.33426	0.522691	-0.522357
0.00545	2.37913	0.85177	-1.24811	-1.78085	-0.32463	-1.12673	-1.0202	-0.13889	4.46271		0.00545	-6.97227	5.52974	4.09594	-7.31799	4.74697	-2.09898	-6.76006	2.10442	-3.67722		0.00545	0.914467	-0.0179411	0.856698	-0.212796	-0.773591	1.52144	2.3361	0.526475	-0.515425
0.0055	2.40364	0.85198	-1.2361	-1.78898	-0.31348	-1.12776	-1.00655	-0.13124	4.44113		0.0055	-8.79766	4.39083	4.76681	-4.15086	3.03079	-2.86346	-6.76006	3.30574	-2.5227		0.0055	0.91282	-0.0122789	0.847071	-0.213306	-0.77432	1.52321	2.33795	0.530224	-0.508541
0.00555	2.42802	0.85222	-1.22406	-1.79674	-0.30187	-1.12921	-0.99268	-0.12332	4.41928		0.00555	-6.98788	1.95697	5.6093	2.41743	1.79826	-3.40951	-6.46363	4.70989	1.47132		0.00555	0.911121	-0.00663954	0.837405	-0.213796	-0.775021	1.525	2.3398	0.533937	-0.501706
0.0056	2.45226	0.85247	-1.21199	-1.80414	-0.28978	-1.13107	-0.97858	-0.11512	4.39717		0.0056	-4.24199	1.50452	3.08183	2.49543	0.628137	-1.59973	-4.98148	5.24034	1.62734		0.0056	0.90937	-0.00102416	0.827696	-0.214268	-0.775693	1.52682	2.34166	0.537614	-0.494922
0.00565	2.47634	0.85274	-1.1999	-1.81118	-0.27723	-1.13335	-0.96427	-0.10665	4.37479		0.00565	-5.36531	3.50153	1.97412	0.311206	1.51743	-0.694831	-4.71625	4.91271	0.519622		0.00565	0.907565	0.0045652	0.817949	-0.214721	-0.776333	1.52867	2.34352	0.541251	-0.488195
0.0057	2.50027	0.85303	-1.18777	-1.81785	-0.2642	-1.13606	-0.94974	-0.09789	4.35216		0.0057	-5.70854	1.2237	1.05362	0.857263	2.2195	-0.367197	-5.88637	3.64898	-2.86593		0.0057	0.905709	0.0101277	0.808164	-0.215154	-0.77694	1.53054	2.34537	0.544847	-0.481526
0.00575	2.52402	0.85334	-1.17563	-1.82415	-0.2507	-1.13918	-0.935	-0.08886	4.32928		0.00575	-4.83485	0.178386	0.0707191	1.65295	0.908967	-0.242384	-7.93019	3.08732	-6.89115		0.00575	0.9038	0.0156601	0.798341	-0.215568	-0.777513	1.53244	2.34723	0.548399	-0.474918
0.0058	2.5476	0.85368	-1.16346	-1.83008	-0.23673	-1.14272	-0.92005	-0.07954	4.30615		0.0058	-3.52431	1.95697	-1.34903	0.576433	-0.370367	-1.14728	-10.5513	3.11852	-6.81314		0.0058	0.90184	0.021163	0.788481	-0.215962	-0.778051	1.53436	2.34909	0.551906	-0.46837
0.00585	2.57099	0.85405	-1.15127	-1.83565	-0.22228	-1.14669	-0.90489	-0.06995	4.28277		0.00585	-3.96116	4.51564	1.38126	1.01328	0.300503	-2.87906	-12.5951	1.04351	-4.98775		0.00585	0.899828	0.026635	0.778584	-0.216336	-0.778553	1.53632	2.35094	0.555366	-0.461888
0.0059	2.59417	0.85444	-1.13906	-1.84084	-0.20735	-1.15108	-0.88954	-0.06007	4.25916		0.0059	-5.80215	5.15531	3.95552	1.80896	1.00258	-2.66064	-12.4859	1.43355	-4.17647		0.0059	0.897766	0.0320754	0.768651	-0.21669	-0.779019	1.5383	2.3528	0.558777	-0.455471
0.00595	2.61715	0.85486	-1.12684	-1.84567	-0.19195	-1.15588	-0.87398	-0.04992	4.23532		0.00595	-3.96116	3.93838	5.32847	1.79336	0.0976818	-1.19408	-10.3172	3.71138	-4.66012		0.00595	0.895653	0.0374831	0.758684	-0.217022	-0.779446	1.54031	2.35464	0.562137	-0.449119
0.006	2.6399	0.85531	-1.1146	-1.85012	-0.17607	-1.16111	-0.85822	-0.03948	4.21125		0.006	-2.63502	4.1412	7.60631	0.0147747	-2.67941	-1.49051	-8.61666	3.99221	-5.98626		0.006	0.893489	0.0428571	0.748683	-0.217331	-0.779835	1.54235	2.35649	0.565445	-0.442835
0.00605	2.66243	0.8558	-1.10235	-1.8542	-0.15971	-1.16676	-0.84228	-0.02877	4.18695		0.00605	-4.85045	4.65605	6.82622	-2.07584	-3.03825	-4.1896	-9.56836	0.996701	-6.75074		0.00605	0.891276	0.0481956	0.738644	-0.217617	-0.780183	1.54442	2.35832	0.568702	-0.436621
0.0061	2.68472	0.85631	-1.09008	-1.85791	-0.14287	-1.17283	-0.82614	-0.01777	4.16244		0.0061	-5.72414	4.71846	4.22075	-3.43319	-1.16605	-5.2193	-10.7229	0.762676	-4.5041		0.0061	0.889013	0.0534979	0.728573	-0.217881	-0.780489	1.54652	2.36015	0.571905	-0.430477
0.00615	2.70676	0.85687	-1.0778	-1.86125	-0.12555	-1.17931	-0.80982	-0.0065	4.13771		0.00615	-3.99236	4.45323	3.47187	-1.60779	0.0976818	-6.85747	-10.7073	2.96251	-2.63191		0.00615	0.886699	0.0587619	0.718467	-0.218121	-0.780752	1.54865	2.36197	0.575051	-0.424405
0.0062	2.72854	0.85746	-1.06552	-1.86422	-0.10775	-1.18621	-0.79332	0.00504	4.11277		0.0062	-2.27618	3.92278	3.23785	-0.562486	0.75295	-8.63606	-10.2704	5.11553	-1.08735		0.0062	0.884338	0.0639863	0.708326	-0.218336	-0.780969	1.5508	2.36377	0.57814	-0.418405
0.00625	2.75006	0.85808	-1.05322	-1.86681	-0.08948	-1.19353	-0.77665	0.01687	4.08763		0.00625	-2.80664	3.25191	1.75569	-0.624892	1.81386	-8.49565	-9.72437	6.81611	-2.64751		0.00625	0.88193	0.0691693	0.698152	-0.218527	-0.781143	1.55298	2.36556	0.58117	-0.412483
0.0063	2.77129	0.85875	-1.04092	-1.86904	-0.07072	-1.20125	-0.7598	0.02896	4.06228		0.0063	-3.60232	5.0773	0.835199	-0.0632334	2.2039	-6.82627	-8.39824	5.94242	-3.73962		0.0063	0.879475	0.07431	0.687946	-0.218694	-0.78127	1.55518	2.36734	0.584139	-0.406637
0.00635	2.79224	0.85946	-1.02861	-1.8709	-0.0515	-1.20939	-0.74279	0.04133	4.03675		0.00635	-3.04066	7.43314	1.28765	2.08979	0.238096	-3.53433	-7.22811	3.66458	-2.75672		0.00635	0.876973	0.0794068	0.677709	-0.218837	-0.781352	1.55741	2.36911	0.587046	-0.400871
0.0064	2.8129	0.86021	-1.0163	-1.87238	-0.03179	-1.21794	-0.72561	0.05398	4.01102		0.0064	0.812938	3.81357	2.28615	3.46273	-2.35177	-2.67624	-7.04089	4.38225	-3.27157		0.0064	0.874422	0.0844581	0.667442	-0.218956	-0.781387	1.55967	2.37085	0.589887	-0.395185
0.00645	2.83324	0.86101	-1.00398	-1.8735	-0.01162	-1.22689	-0.70827	0.06689	3.98512		0.00645	3.18439	-1.44418	2.98822	2.54224	-0.370367	-2.2862	-7.93019	3.68018	-4.27008		0.00645	0.871823	0.0894637	0.657143	-0.21905	-0.781373	1.56195	2.37258	0.59266	-0.389581
0.0065	2.85328	0.86185	-0.99166	-1.87426	0.00903	-1.23624	-0.69078	0.08006	3.95903		0.0065	2.4043	-1.78742	3.78391	1.90257	1.1898	-1.53732	-7.88338	2.85329	-4.94095		0.0065	0.869177	0.094421	0.646815	-0.219121	-0.781307	1.56426	2.37429	0.595362	-0.384061
0.00655	2.87299	0.86273	-0.97934	-1.87464	0.03015	-1.246	-0.67315	0.0935	3.93277		0.00655	-0.809631	2.33141	4.18955	-0.203648	1.93867	-2.16138	-7.80537	2.83769	-1.85183		0.00655	0.866482	0.0993292	0.636457	-0.219167	-0.781188	1.5666	2.37597	0.597992	-0.378626
0.0066	2.89236	0.86367	-0.96702	-1.87467	0.05174	-1.25615	-0.65536	0.1072	3.90635		0.0066	-2.63502	5.99779	3.50308	-1.28016	2.03228	-4.64204	-7.68056	2.65047	1.12809		0.0066	0.863737	0.104187	0.626069	-0.219188	-0.781014	1.56897	2.37762	0.600547	-0.373278
0.00665	2.91139	0.86465	-0.9547	-1.87433	0.07379	-1.26669	-0.63744	0.12116	3.87976		0.00665	-3.60232	5.46734	3.87752	-1.20215	0.721747	-5.34412	-6.35442	2.47886	-0.416476		0.00665	0.860943	0.108992	0.615651	-0.219184	-0.780783	1.57137	2.37925	0.603027	-0.368017
0.0067	2.93007	0.86569	-0.94237	-1.87363	0.09631	-1.27763	-0.61939	0.13538	3.85302		0.0067	-5.72414	2.191	4.26756	-0.422071	-0.557587	-5.53134	-5.96438	3.80499	-3.77083		0.0067	0.8581	0.113745	0.605205	-0.219154	-0.780496	1.5738	2.38086	0.605428	-0.362841
0.00675	2.94839	0.86678	-0.93005	-1.87258	0.11929	-1.28894	-0.60121	0.14985	3.82612		0.00675	-6.36381	0.708841	3.30026	0.436019	-1.22846	-3.09748	-7.04089	3.08732	-2.5383		0.00675	0.855208	0.118442	0.594733	-0.219096	-0.780149	1.57626	2.38243	0.607749	-0.357753
0.0068	2.96634	0.86792	-0.91773	-1.87116	0.14273	-1.30064	-0.5829	0.16457	3.79908		0.0068	-3.55552	3.00228	2.47337	-0.687299	0.0820802	-3.2847	-7.50894	2.82209	-2.47589		0.0068	0.852267	0.123083	0.584233	-0.219009	-0.779743	1.57874	2.38397	0.609987	-0.352754
0.00685	2.98391	0.86912	-0.90541	-1.8694	0.16662	-1.31272	-0.56448	0.17953	3.77191		0.00685	-2.71303	6.69987	1.02242	1.66855	2.46913	-4.50163	-5.99558	3.24334	-3.08435		0.00685	0.849278	0.127667	0.573707	-0.218891	-0.779276	1.58126	2.38548	0.612142	-0.347844
0.0069	3.0011	0.87037	-0.89309	-1.86728	0.19097	-1.32517	-0.54595	0.19474	3.7446		0.0069	-2.07336	4.07879	-0.350525	1.38772	3.38963	-2.80105	-4.84106	5.28715	-4.36369		0.0069	0.846242	0.132191	0.563156	-0.218741	-0.778751	1.5838	2.38696	0.61421	-0.343025
0.00695	3.01789	0.87168	-0.88078	-1.86481	0.21576	-1.33799	-0.52731	0.21019	3.71716		0.00695	-0.403989	-0.6485	-2.45674	-0.172445	3.59245	-2.48902	-5.09069	7.54938	-2.50709		0.00695	0.843159	0.136655	0.552579	-0.21856	-0.778163	1.58637	2.3884	0.616194	-0.338298
0.007	3.03427	0.87305	-0.86847	-1.862	0.24099	-1.35117	-0.50857	0.22587	3.6896		0.007	-1.82374	-1.53779	-3.0184	-0.765307	4.66896	-4.14279	-5.73036	7.7054	-0.666102		0.007	0.840032	0.14106	0.541978	-0.218347	-0.777514	1.58897	2.3898	0.618091	-0.333663
0.00705	3.05024	0.87449	-0.85616	-1.85885	0.26667	-1.3647	-0.48973	0.24178	3.66192		0.00705	-2.69743	2.37822	-1.56745	0.0303764	4.85618	-4.51723	-4.57584	6.09843	-1.96104		0.00705	0.836861	0.145404	0.531354	-0.218104	-0.776801	1.5916	2.39118	0.619901	-0.329124
0.0071	3.06579	0.87598	-0.84385	-1.85535	0.29279	-1.37859	-0.47081	0.25792	3.63414		0.0071	-3.69593	3.96958	0.616776	0.264401	2.68755	-2.69184	-4.29501	4.24184	-3.11556		0.0071	0.833645	0.149687	0.520706	-0.217828	-0.776022	1.59426	2.39251	0.621623	-0.32468
0.00715	3.08091	0.87753	-0.83155	-1.85152	0.31933	-1.39283	-0.4518	0.27427	3.60625		0.00715	-2.4322	3.84477	0.632378	-0.734103	-0.323562	-3.05068	-5.1999	2.80649	-3.59921		0.00715	0.830385	0.153907	0.510037	-0.217519	-0.775179	1.59695	2.3938	0.623257	-0.320334
0.0072	3.09559	0.87915	-0.81925	-1.84735	0.3463	-1.4074	-0.43271	0.29085	3.57827		0.0072	-0.981249	3.76676	0.616776	-0.390868	-1.01003	-2.89466	-5.1999	0.403839	-3.49		0.0072	0.827082	0.158063	0.499348	-0.217176	-0.774268	1.59966	2.39505	0.624799	-0.316088
0.00725	3.10983	0.88084	-0.80696	-1.84285	0.3737	-1.42231	-0.41356	0.30763	3.55019		0.00725	-3.58672	3.36112	-0.693761	2.55784	0.612536	-2.25499	-6.22961	2.32284	-3.56801		0.00725	0.823736	0.162154	0.488641	-0.216797	-0.773287	1.60242	2.39625	0.62625	-0.311943
0.0073	3.12361	0.88259	-0.79467	-1.83803	0.40151	-1.43755	-0.39434	0.32463	3.52203		0.0073	-7.14389	2.2378	-2.42554	3.1663	2.68755	-2.61383	-7.22811	3.57097	-4.28568		0.0073	0.820347	0.166179	0.477916	-0.216382	-0.772237	1.6052	2.39741	0.627606	-0.307903
0.00735	3.13693	0.88441	-0.78238	-1.83288	0.42973	-1.45311	-0.37506	0.34182	3.49378		0.00735	-9.07849	-0.0712402	-0.631354	2.37062	4.49734	-3.03508	-7.04089	4.03902	-5.4714		0.00735	0.816917	0.170135	0.467172	-0.215931	-0.771118	1.60801	2.39852	0.628868	-0.303968
0.0074	3.14979	0.8863	-0.7701	-1.82741	0.45836	-1.46899	-0.35573	0.35921	3.46547		0.0074	-8.79766	1.95697	0.928809	3.1039	1.82946	-3.62794	-6.83807	5.47437	-5.4402		0.0074	0.813446	0.174023	0.456416	-0.215442	-0.769928	1.61085	2.39958	0.630033	-0.300138
0.00745	3.16216	0.88826	-0.75781	-1.82163	0.48739	-1.48517	-0.33635	0.37679	3.43709		0.00745	-6.64464	4.21921	0.601174	3.79037	-0.807213	-4.96968	-5.13749	6.44167	-2.81913		0.00745	0.809938	0.177843	0.445646	-0.214914	-0.768667	1.61373	2.40059	0.631103	-0.296415
0.0075	3.17406	0.89028	-0.74554	-1.81553	0.51681	-1.50166	-0.31693	0.39456	3.40864		0.0075	-5.88016	2.98668	-1.16181	2.80747	-1.27526	-5.32851	-4.66945	4.53827	0.722443		0.0075	0.806392	0.181592	0.434863	-0.214348	-0.767335	1.61664	2.40156	0.632073	-0.292799
0.00755	3.18546	0.89239	-0.73326	-1.80913	0.54663	-1.51844	-0.29749	0.4125	3.38015		0.00755	-5.45892	3.73556	-3.11201	0.857263	1.14299	-5.82777	-5.90197	3.05612	0.50402		0.00755	0.802811	0.185271	0.424068	-0.213742	-0.765934	1.61958	2.40247	0.632943	-0.289289
0.0076	3.19637	0.89456	-0.72098	-1.80243	0.57682	-1.53551	-0.27801	0.43062	3.3516		0.0076	-6.67584	4.1256	-4.26653	-2.6219	2.32871	-5.46893	-6.22961	1.13712	-2.42909		0.0076	0.799194	0.188878	0.41326	-0.213094	-0.764462	1.62256	2.40333	0.633714	-0.285886
0.00765	3.20678	0.89681	-0.70871	-1.79542	0.60739	-1.55287	-0.25852	0.44891	3.32302		0.00765	-5.70854	2.67465	-2.90919	-5.80463	2.46913	-3.79956	-5.57434	-0.204625	-3.4744		0.00765	0.795543	0.192415	0.402441	-0.212405	-0.76292	1.62557	2.40414	0.634382	-0.282589
0.0077	3.21667	0.89914	-0.69643	-1.78813	0.63833	-1.57049	-0.23901	0.46735	3.29439		0.0077	-2.51021	0.677638	-1.47384	-5.35219	3.34282	-1.10047	-5.41832	1.87039	-0.946932		0.0077	0.791859	0.19588	0.391611	-0.211672	-0.761308	1.62861	2.4049	0.634946	-0.279399
0.00775	3.22604	0.90154	-0.68416	-1.78054	0.66963	-1.58838	-0.2195	0.48595	3.26574		0.00775	0.204475	-0.180452	-2.75318	-2.41908	4.04489	-1.27209	-4.09219	2.75968	-0.900127		0.00775	0.788141	0.199272	0.380773	-0.210894	-0.759629	1.63169	2.4056	0.635404	-0.276318
0.0078	3.2349	0.90402	-0.67189	-1.77267	0.70128	-1.60653	-0.19998	0.5047	3.23707		0.0078	-2.24498	2.84626	-2.17592	0.54523	2.70315	-1.80255	-2.45401	2.85329	-2.86593		0.0078	0.784391	0.202592	0.369926	-0.210072	-0.757878	1.63481	2.40624	0.635756	-0.273347
0.00785	3.24322	0.90658	-0.65961	-1.76452	0.73328	-1.62492	-0.18048	0.52358	3.20838		0.00785	-6.06738	2.73705	-1.17741	1.2317	2.1571	-1.81815	-1.43991	2.10442	-3.70842		0.00785	0.78061	0.205837	0.359074	-0.209203	-0.756059	1.63796	2.40683	0.636	-0.270485
0.0079	3.25101	0.90922	-0.64733	-1.75609	0.76562	-1.64356	-0.16099	0.54261	3.17968		0.0079	-8.25161	-1.45979	-0.865379	-0.905721	2.2351	-2.66064	-1.22149	2.63487	-1.24336		0.0079	0.776799	0.209006	0.348217	-0.208288	-0.75417	1.64115	2.40737	0.636136	-0.267734
0.00795	3.25825	0.91194	-0.63505	-1.7474	0.79829	-1.66243	-0.14152	0.56175	3.15098		0.00795	-5.95817	-3.09796	-2.48795	-0.765307	2.37552	-3.78395	-0.566217	7.26856	-0.868923		0.00795	0.77296	0.212099	0.337357	-0.207326	-0.752212	1.64437	2.40784	0.636163	-0.265095
0.008	3.26495	0.91474	-0.62277	-1.73844	0.83128	-1.68152	-0.12208	0.58102	3.12228		0.008	-4.19518	-2.66111	-2.08231	1.55934	0.94017	-2.64503	-0.69103	12.0739	-2.97514		0.008	0.769093	0.215114	0.326496	-0.206316	-0.750185	1.64763	2.40826	0.636081	-0.262566
0.00805	3.2711	0.91762	-0.61048	-1.72923	0.86459	-1.70083	-0.10267	0.6004	3.09359		0.00805	-6.17659	-1.55339	-1.39583	0.186393	-1.08804	-1.59973	-2.04837	11.9178	-4.02045		0.00805	0.765199	0.218051	0.315634	-0.205257	-0.74809	1.65093	2.40861	0.635889	-0.26015
0.0081	3.27669	0.92059	-0.59819	-1.71976	0.8982	-1.72035	-0.08331	0.61988	3.06492		0.0081	-6.05178	0.178386	-0.756167	-1.32697	-0.916424	-1.81815	-1.64273	8.00183	-4.5041		0.0081	0.761277	0.220908	0.304773	-0.204149	-0.745928	1.65427	2.40891	0.635586	-0.257845
0.00815	3.28171	0.92364	-0.58589	-1.71004	0.93212	-1.74007	-0.06399	0.63947	3.03627		0.00815	-3.96116	-0.461281	-0.802972	-2.45028	0.737349	-2.02097	-0.815844	4.27304	-2.49149		0.00815	0.75733	0.223683	0.293913	-0.202991	-0.743697	1.65764	2.40914	0.635171	-0.255653
0.0082	3.28617	0.92677	-0.57358	-1.70008	0.96632	-1.75998	-0.04474	0.65914	3.00765		0.0082	-4.46041	-2.23987	-0.724964	-1.96663	4.49734	-3.09748	1.27477	1.964	-0.0264354		0.0082	0.753356	0.226377	0.283059	-0.201782	-0.741397	1.66106	2.40931	0.634643	-0.253573
0.00825	3.29006	0.93	-0.56127	-1.68988	1.0008	-1.78006	-0.02554	0.67889	2.97906		0.00825	-6.87866	-2.86393	0.00831255	1.2161	4.82498	-4.08038	0.447888	1.72998	1.92377		0.00825	0.749357	0.228989	0.27221	-0.200522	-0.739027	1.6645	2.40942	0.634	-0.251609
0.0083	3.29337	0.93331	-0.54894	-1.67945	1.03555	-1.80032	-0.00642	0.69872	2.95052		0.0083	-6.39501	-1.75622	0.507565	3.35352	3.07759	-4.92287	-1.56472	3.21213	1.81456		0.0083	0.745331	0.231519	0.261369	-0.199212	-0.736589	1.66798	2.40946	0.633244	-0.249759
0.00835	3.29609	0.9367	-0.5366	-1.66879	1.07057	-1.82074	0.01263	0.71862	2.92203		0.00835	-4.02357	-0.523687	1.35005	2.63585	0.362909	-6.28021	-1.67393	3.60217	0.519622		0.00835	0.741281	0.233965	0.25054	-0.197852	-0.73408	1.67149	2.40944	0.632374	-0.248027
0.0084	3.29824	0.94019	-0.52426	-1.65792	1.10584	-1.84132	0.03159	0.73857	2.89359		0.0084	-5.63053	-1.50659	-0.256915	-0.359664	-2.50779	-5.76536	-0.87825	3.18093	0.0671744		0.0084	0.737206	0.236327	0.23972	-0.196443	-0.731502	1.67502	2.40935	0.631388	-0.246411
0.00845	3.29979	0.94376	-0.51189	-1.64683	1.14135	-1.86204	0.05046	0.75858	2.86521		0.00845	-7.65875	-3.86244	-3.86089	-1.90423	-3.11625	-3.2535	-3.95177	3.8674	0.176386		0.00845	0.733106	0.238601	0.228914	-0.194985	-0.728853	1.67859	2.4092	0.630288	-0.244912
0.0085	3.30076	0.94743	-0.49952	-1.63554	1.17709	-1.88289	0.06923	0.77862	2.83691		0.0085	-7.36232	-4.22127	-9.43067	-0.110038	-0.869619	-0.429603	-7.58695	4.88151	-0.244858		0.0085	0.728981	0.240789	0.218121	-0.193479	-0.726136	1.68218	2.40898	0.629072	-0.243531
0.00855	3.30112	0.95118	-0.48713	-1.62404	1.21305	-1.90387	0.0879	0.7987	2.80867		0.00855	-5.80215	-2.80153	-10.9752	0.857263	2.39112	2.09786	-8.17981	5.58358	0.0671744		0.00855	0.724833	0.242888	0.207343	-0.191924	-0.723351	1.6858	2.4087	0.627739	-0.242266
0.0086	3.30089	0.95503	-0.47472	-1.61235	1.24923	-1.92497	0.10645	0.81881	2.78052		0.0086	-7.67435	-1.91223	-7.54288	1.30971	-0.229952	2.11346	-6.76006	7.01893	1.89256		0.0086	0.720661	0.244897	0.196583	-0.190319	-0.720497	1.68944	2.40836	0.626292	-0.241118
0.00865	3.30006	0.95896	-0.46229	-1.60048	1.28561	-1.94617	0.12488	0.83893	2.75246		0.00865	-8.56364	-2.25547	-5.10902	1.55934	-3.74032	1.41139	-5.02828	7.7054	2.32941		0.00865	0.716466	0.246817	0.185841	-0.188662	-0.717576	1.69311	2.40794	0.62473	-0.240084
0.0087	3.29862	0.96299	-0.44985	-1.58841	1.32219	-1.96746	0.14319	0.85906	2.7245		0.0087	-7.76796	-2.84833	-1.9887	2.38622	-8.26479	2.87794	-3.00007	6.25445	0.472817		0.0087	0.712248	0.248648	0.175121	-0.186954	-0.714587	1.6968	2.40746	0.623056	-0.239165
0.00875	3.29657	0.96712	-0.43738	-1.57618	1.35894	-1.98885	0.16136	0.8792	2.69663		0.00875	-9.21891	-2.23987	0.913207	0.935271	-8.84205	1.13056	-2.3292	4.8035	-1.18096		0.00875	0.708006	0.250386	0.164426	-0.185193	-0.711528	1.70052	2.40691	0.621269	-0.238359
0.0088	3.29391	0.97133	-0.42489	-1.56377	1.39587	-2.0103	0.17939	0.89932	2.66887		0.0088	-8.78206	-0.16485	1.30325	-0.656095	-5.59691	-2.92586	-1.53352	4.25744	-1.49299		0.0088	0.70374	0.252032	0.15376	-0.183378	-0.7084	1.70426	2.4063	0.619369	-0.237666
0.00885	3.29064	0.97564	-0.41238	-1.5512	1.43296	-2.03183	0.19727	0.91943	2.64123		0.00885	-8.65725	2.50303	-0.256915	-1.7014	-1.04124	-2.56703	-3.20289	2.15122	-0.619297		0.00885	0.699453	0.253586	0.143124	-0.181512	-0.7052	1.70801	2.40562	0.617358	-0.237087
0.0089	3.28676	0.98005	-0.39984	-1.53847	1.47019	-2.05341	0.21499	0.93951	2.61371		0.0089	-8.71966	1.48892	-2.67517	-1.6858	0.550129	0.84973	-5.66795	-0.781885	-0.16685		0.0089	0.695141	0.255047	0.13252	-0.179593	-0.701929	1.71179	2.40488	0.615235	-0.236619
0.00895	3.28226	0.98455	-0.38728	-1.52559	1.50757	-2.07504	0.23255	0.95955	2.58632		0.00895	-6.58223	-1.6314	-3.9857	2.1366	0.253698	3.36159	-5.85517	-2.96611	-2.27307		0.00895	0.690807	0.256417	0.121951	-0.177621	-0.698585	1.71559	2.40407	0.612999	-0.236261
0.009	3.27715	0.98915	-0.37468	-1.51257	1.54507	-2.09671	0.24994	0.97955	2.55906		0.009	-5.42771	-1.10095	-6.02952	4.86688	-0.307961	1.02135	-6.27641	-2.24844	-3.81763		0.009	0.686447	0.257693	0.111419	-0.175597	-0.69517	1.7194	2.4032	0.610652	-0.236013
0.00905	3.27141	0.99384	-0.36206	-1.49941	1.58269	-2.1184	0.26716	0.9995	2.53194		0.00905	-8.92248	-0.0244353	-6.60678	4.43004	-1.79012	-1.77134	-4.90347	0.934294	-4.76933		0.00905	0.682065	0.258877	0.100924	-0.17352	-0.691684	1.72323	2.40226	0.608194	-0.235872
0.0091	3.26506	0.99863	-0.34941	-1.48612	1.62041	-2.14011	0.28419	1.01939	2.50497		0.0091	-9.20331	1.14569	-4.39135	1.27851	-2.46099	-0.351595	-4.73185	3.49296	-4.36369		0.0091	0.677661	0.259967	0.0904717	-0.171388	-0.688126	1.72708	2.40126	0.605627	-0.235837
0.00915	3.25809	1.00351	-0.33672	-1.47271	1.65822	-2.16183	0.30103	1.03921	2.47815		0.00915	-6.64464	1.2705	-2.9404	-1.60779	-1.94613	2.59711	-3.56173	3.75819	-2.22627		0.00915	0.673237	0.260966	0.0800625	-0.169201	-0.684495	1.73094	2.40019	0.602953	-0.235906
0.0092	3.2505	1.00849	-0.324	-1.45917	1.69612	-2.18355	0.31768	1.05895	2.4515		0.0092	-1.19967	-2.17746	-3.34604	-1.34257	-1.18165	4.20408	-0.550616	3.61777	0.254394		0.0092	0.668793	0.261875	0.0696972	-0.166958	-0.680787	1.73481	2.39906	0.600172	-0.236078
0.00925	3.24228	1.01357	-0.31125	-1.44553	1.73408	-2.20525	0.33412	1.0786	2.42501		0.00925	2.70074	-0.882525	-4.20413	0.045978	-0.776009	3.424	-2.03277	3.35255	-0.16685		0.00925	0.66433	0.262692	0.0593775	-0.164661	-0.677002	1.73869	2.39786	0.597284	-0.236353
0.0093	3.23345	1.01875	-0.29845	-1.43179	1.77211	-2.22693	0.35035	1.09816	2.39869		0.0093	-2.88465	2.39382	-3.25243	1.04448	-1.49368	1.34898	-3.76455	3.07172	-3.56801		0.0093	0.659847	0.263421	0.0491037	-0.16231	-0.673136	1.74259	2.39659	0.59429	-0.236729
0.00935	3.224	1.02403	-0.28562	-1.41794	1.81018	-2.24858	0.36636	1.1176	2.37255		0.00935	-8.75086	3.1895	-0.865379	1.46573	-2.21136	-1.69334	-2.43841	3.97661	-5.95505		0.00935	0.655347	0.264064	0.0388778	-0.159904	-0.669189	1.74649	2.39525	0.59119	-0.237205
0.0094	3.21392	1.0294	-0.27275	-1.40401	1.84828	-2.27018	0.38214	1.13694	2.3466		0.0094	-9.59335	0.0691745	-2.0667	1.09129	-1.83692	-2.11458	-0.97186	5.30275	-5.54941		0.0094	0.650827	0.264621	0.0287019	-0.157445	-0.665157	1.75041	2.39384	0.587982	-0.237777
0.00945	3.20323	1.03487	-0.25984	-1.38999	1.88641	-2.29173	0.3977	1.15615	2.32083		0.00945	-10.7479	-3.33198	-3.0184	2.23021	-0.854018	-0.382798	-2.17319	4.14823	-2.75672		0.00945	0.646288	0.265093	0.0185787	-0.154934	-0.661041	1.75434	2.39236	0.584668	-0.238444
0.0095	3.19192	1.04044	-0.24688	-1.37589	1.92454	-2.31322	0.41302	1.17522	2.29527		0.0095	-8.61045	-2.73912	-3.75168	2.08979	-0.604392	-0.023961	-3.17169	0.544253	-1.86743		0.0095	0.641731	0.265482	0.00851091	-0.152369	-0.656838	1.75828	2.39081	0.581249	-0.239205
0.00955	3.17999	1.04611	-0.23388	-1.36173	1.96268	-2.33464	0.42809	1.19416	2.26991		0.00955	-6.72265	-0.788915	-5.46786	1.48133	0.425316	-0.476408	-1.64273	-1.96761	-2.08585		0.00955	0.637156	0.26579	-0.00149938	-0.149752	-0.652549	1.76223	2.38919	0.577727	-0.240059
0.0096	3.16744	1.05188	-0.22083	-1.3475	2.0008	-2.35598	0.44292	1.21294	2.24476		0.0096	-5.97377	1.03648	-5.9047	0.0771813	1.53303	0.100852	-0.457006	-1.81159	-1.92983		0.0096	0.632564	0.266015	-0.0114516	-0.147083	-0.648173	1.76619	2.3875	0.574103	-0.241005
0.00965	3.15428	1.05775	-0.20774	-1.33321	2.03889	-2.37722	0.45749	1.23156	2.21983		0.00965	-5.86456	2.00378	-6.51317	0.482824	2.48473	0.537698	-1.06547	-0.719478	-2.72552		0.00965	0.627956	0.266159	-0.021346	-0.14436	-0.64371	1.77017	2.38574	0.570377	-0.242042
0.0097	3.14051	1.06371	-0.19459	-1.31887	2.07695	-2.39836	0.47179	1.25002	2.19512		0.0097	-3.89875	1.95697	-6.35715	1.74656	3.77967	-0.335994	-1.75194	-1.06271	-3.25597		0.0097	0.623332	0.266223	-0.0311814	-0.141584	-0.639159	1.77414	2.38391	0.566549	-0.243167
0.00975	3.12613	1.06978	-0.1814	-1.30449	2.11495	-2.41939	0.48583	1.26829	2.17064		0.00975	-3.92996	2.62784	-7.05923	2.86987	3.81087	-0.148774	-1.97036	0.559855	-3.13116		0.00975	0.618693	0.266208	-0.040958	-0.138757	-0.634519	1.77813	2.382	0.562622	-0.244381
0.0098	3.11114	1.07594	-0.16815	-1.29007	2.15289	-2.44031	0.49959	1.28638	2.1464		0.0098	-3.97676	3.1427	-9.36827	1.68415	4.41933	-1.78695	-1.29949	0.809481	-3.69282		0.0098	0.61404	0.266115	-0.050674	-0.135878	-0.62979	1.78212	2.38003	0.558595	-0.245679
0.00985	3.09554	1.0822	-0.15485	-1.27561	2.19075	-2.46109	0.51307	1.30428	2.1224		0.00985	-3.3683	4.76526	-9.78951	1.06008	3.34282	-2.48902	0.120254	-0.766283	-4.83174		0.00985	0.609374	0.265948	-0.0603281	-0.132949	-0.624971	1.78611	2.37799	0.554468	-0.247062
0.0099	3.07934	1.08856	-0.14149	-1.26114	2.22853	-2.48173	0.52626	1.32197	2.09864		0.0099	-3.69593	5.46734	-10.5228	-0.858916	-0.0115296	-0.242384	3.4434	-1.46836	-4.28568		0.0099	0.604693	0.265706	-0.0699178	-0.129971	-0.620065	1.79009	2.37588	0.550244	-0.248526
0.00995	3.06255	1.09502	-0.12808	-1.24664	2.26621	-2.50222	0.53916	1.33944	2.07514		0.00995	-3.52431	6.65306	-9.22785	-1.26456	-3.45949	0.818527	5.48721	0.060603	-1.68021		0.00995	0.600001	0.265392	-0.079442	-0.126944	-0.615072	1.79408	2.3737	0.545921	-0.250069
0.01	3.04515	1.10158	-0.11461	-1.23214	2.30377	-2.52255	0.55176	1.3567	2.05189		0.01	-4.3044	3.12709	-8.01092	-0.936925	-5.64372	-0.382798	2.4605	1.43355	1.64294		0.01	0.595298	0.265004	-0.088901	-0.12387	-0.609992	1.79806	2.37145	0.5415	-0.251688
0.01005	3.02717	1.10824	-0.10108	-1.21763	2.34121	-2.54272	0.56406	1.37372	2.02891		0.01005	-5.22489	-1.69381	-9.38387	0.108385	-4.64521	-1.97416	1.00955	1.0279	0.675638		0.01005	0.590584	0.264546	-0.0982933	-0.120749	-0.604826	1.80204	2.36913	0.53698	-0.253381
0.0101	3.00859	1.11499	-0.08749	-1.20312	2.37851	-2.56271	0.57605	1.39051	2.0062		0.0101	-6.48862	-2.00584	-9.92993	0.498425	-0.666798	-0.148774	1.22797	-1.26554	0.488418		0.0101	0.585862	0.264016	-0.107619	-0.117583	-0.599572	1.80601	2.36674	0.532363	-0.255148
0.01015	2.98943	1.12184	-0.07383	-1.18861	2.41566	-2.58252	0.58772	1.40705	1.98377		0.01015	-6.53543	0.428012	-8.7754	0.186393	2.09469	1.09936	-0.347795	-3.57458	0.940866		0.01015	0.581134	0.263416	-0.116877	-0.114374	-0.594231	1.80998	2.36428	0.527648	-0.256986
0.0102	2.96969	1.12879	-0.06012	-1.17413	2.45265	-2.60213	0.59907	1.42333	1.96162		0.0102	-6.2234	2.2066	-11.1156	0.373612	3.76406	1.81703	-1.86115	-2.48246	1.2841		0.0102	0.576399	0.262749	-0.126068	-0.111122	-0.588804	1.81394	2.36175	0.522836	-0.258895
0.01025	2.94938	1.13584	-0.04634	-1.15966	2.48946	-2.62154	0.61009	1.43935	1.93976		0.01025	-6.41062	0.630833	-13.4871	-0.0320301	3.32722	0.397283	-1.29949	-1.56197	0.41041		0.01025	0.571661	0.262014	-0.135191	-0.107831	-0.583292	1.81789	2.35916	0.517926	-0.260872
0.0103	2.92849	1.14299	-0.03249	-1.14522	2.52609	-2.64074	0.62079	1.4551	1.91819		0.0103	-6.36381	-0.476883	-11.6149	-0.0320301	0.65934	-0.460807	-0.0201604	-2.09242	-0.697305		0.0103	0.56692	0.261215	-0.144246	-0.104504	-0.577695	1.82183	2.35649	0.51292	-0.262917
0.01035	2.90703	1.15023	-0.01858	-1.13081	2.56251	-2.65972	0.63114	1.47057	1.89692		0.01035	-5.22489	-0.336468	-9.21225	0.685645	-0.151944	1.80143	1.13436	-1.23433	-0.0888419		0.01035	0.562177	0.260352	-0.153231	-0.101142	-0.572011	1.82575	2.35376	0.507818	-0.265028
0.0104	2.88502	1.15756	-0.00459	-1.11643	2.59873	-2.67847	0.64116	1.48575	1.87595		0.0104	-4.32	-0.788915	-6.38836	1.87137	-0.838416	2.22267	0.46349	-0.220226	-0.556891		0.0104	0.557431	0.25943	-0.162146	-0.0977475	-0.566242	1.82966	2.35096	0.502621	-0.267203
0.01045	2.86245	1.165	0.00946	-1.1021	2.63472	-2.69698	0.65083	1.50063	1.85529		0.01045	-1.54291	-0.25846	-5.17143	2.76066	-0.838416	1.16176	-0.535014	0.201018	-4.14527		0.01045	0.552684	0.258448	-0.17099	-0.0943215	-0.560388	1.83356	2.34809	0.49733	-0.269443
0.0105	2.83933	1.17253	0.02358	-1.08783	2.67048	-2.71525	0.66015	1.51521	1.83495		0.0105	1.26539	0.771248	-5.77989	4.19601	-1.13485	1.11496	-0.925055	1.04351	-5.36219		0.0105	0.547937	0.257409	-0.179761	-0.0908676	-0.554452	1.83743	2.34516	0.491947	-0.271743
0.01055	2.81566	1.18015	0.03777	-1.0736	2.70598	-2.73327	0.66911	1.52947	1.81493		0.01055	-1.12166	-0.601696	-7.90171	3.54074	-1.79012	0.865332	0.276271	0.060603	-3.27157		0.01055	0.543186	0.256313	-0.188459	-0.0873883	-0.548435	1.84127	2.34216	0.486474	-0.274102
0.0106	2.79146	1.18787	0.05203	-1.05944	2.74123	-2.75103	0.67772	1.54342	1.79523		0.0106	-3.89875	-3.75322	-9.61789	1.2161	-2.74181	2.34749	2.4917	-0.984706	0.862857		0.0106	0.538436	0.255163	-0.197082	-0.0838859	-0.542338	1.84508	2.3391	0.48091	-0.276517
0.01065	2.76672	1.19568	0.06637	-1.04535	2.7762	-2.76852	0.68595	1.55704	1.77587		0.01065	-2.10457	-4.72053	-9.29026	-3.05875	-4.56721	2.90915	1.93004	0.263424	1.2997		0.01065	0.533684	0.25396	-0.205629	-0.0803632	-0.536163	1.84887	2.33597	0.475256	-0.278987
0.0107	2.74146	1.20359	0.08078	-1.03133	2.81089	-2.78573	0.69383	1.57032	1.75683		0.0107	-0.887639	-3.95605	-7.27765	-3.24597	-5.92455	-0.023961	-0.378998	0.637863	0.769248		0.0107	0.528933	0.252707	-0.214099	-0.0768223	-0.529914	1.85263	2.33279	0.469515	-0.281511
0.01075	2.71568	1.21158	0.09527	-1.01738	2.84529	-2.80266	0.70132	1.58327	1.73814		0.01075	-1.4649	0.318801	-5.01541	-2.37227	-4.08355	-0.476408	-1.67393	0.0293997	1.17489		0.01075	0.524182	0.251403	-0.222491	-0.0732648	-0.523592	1.85635	2.32954	0.463687	-0.284088
0.0108	2.68939	1.21967	0.10983	-1.00352	2.87938	-2.8193	0.70845	1.59586	1.7198		0.0108	-1.60531	1.13009	-4.21973	0.155189	-1.47808	3.09636	0.853531	-1.874	1.01887		0.0108	0.519432	0.250052	-0.230803	-0.0696927	-0.5172	1.86005	2.32622	0.457777	-0.286714
0.01085	2.6626	1.22786	0.12447	-0.98975	2.91314	-2.83565	0.71519	1.6081	1.70181		0.01085	-2.12017	0.818053	-2.51915	5.10091	-0.0115296	4.78134	2.39809	-1.10952	0.753646		0.01085	0.514682	0.248654	-0.239034	-0.0661064	-0.510738	1.8637	2.32285	0.451784	-0.289388
0.0109	2.63531	1.23613	0.13919	-0.97607	2.94658	-2.85169	0.72155	1.61997	1.68417		0.0109	-4.32	-1.74061	-2.12911	7.28513	-1.18165	4.20408	3.91145	-0.313836	-0.0888419		0.0109	0.509934	0.24721	-0.247182	-0.0625075	-0.504207	1.86732	2.31941	0.44571	-0.292109
0.01095	2.60753	1.24449	0.15399	-0.96249	2.97967	-2.86742	0.72752	1.63147	1.66689		0.01095	-5.98937	-3.73762	-2.37874	5.0385	-0.183148	2.33188	3.75543	1.79238	-0.322866		0.01095	0.505186	0.245723	-0.255247	-0.0588966	-0.497609	1.8709	2.3159	0.439555	-0.294877
0.011	2.57926	1.25294	0.16886	-0.94902	3.01242	-2.88283	0.7331	1.6426	1.64997		0.011	-5.73975	-2.28667	-0.272517	3.79037	1.57984	1.5206	2.52291	2.32284	-0.276061		0.011	0.500439	0.244196	-0.263227	-0.0552752	-0.490947	1.87444	2.31233	0.43332	-0.297689
0.01105	2.55053	1.26149	0.18381	-0.93565	3.04479	-2.89792	0.73828	1.65334	1.63343		0.01105	-6.20779	0.178386	-0.646956	3.49394	2.98398	2.28508	3.05336	1.9016	-0.322866		0.01105	0.495695	0.24263	-0.271122	-0.0516434	-0.48422	1.87793	2.3087	0.427006	-0.300546
0.0111	2.52133	1.27011	0.19884	-0.9224	3.07679	-2.91268	0.74307	1.6637	1.61726		0.0111	-3.71153	-0.367671	-2.72197	1.38772	1.42382	2.01985	4.06747	1.9172	-0.0264354		0.0111	0.490951	0.241026	-0.27893	-0.0480033	-0.477434	1.88138	2.30501	0.420612	-0.303447
0.01115	2.49167	1.27883	0.21396	-0.90926	3.10841	-2.92711	0.74746	1.67365	1.60146		0.01115	-2.32299	-1.14775	-4.37575	-0.156843	-0.261156	1.34898	2.19527	2.18242	0.082776		0.01115	0.486208	0.239386	-0.28665	-0.0443564	-0.470587	1.88478	2.30125	0.41414	-0.306392
0.0112	2.46156	1.28763	0.22915	-0.89625	3.13962	-2.94119	0.75145	1.68321	1.58605		0.0112	-3.61792	-1.45979	-6.65358	-0.936925	-3.05385	0.490893	-1.00306	2.49446	1.47132		0.0112	0.481465	0.23771	-0.294284	-0.0407051	-0.46368	1.88813	2.29742	0.40759	-0.309378
0.01125	2.43102	1.29652	0.24442	-0.88336	3.17043	-2.95493	0.75503	1.69236	1.57103		0.01125	-5.05327	-0.383273	-6.55997	-0.827713	-2.13335	1.89504	-1.43991	2.75968	1.37771		0.01125	0.476723	0.235999	-0.301829	-0.0370519	-0.456714	1.89143	2.29353	0.400962	-0.312406
0.0113	2.40004	1.30549	0.25978	-0.87061	3.20082	-2.96831	0.7582	1.70109	1.55639		0.0113	-2.401	-0.601696	-5.98271	-1.52979	2.07909	5.45221	-0.831445	2.10442	-0.728509		0.0113	0.471979	0.234255	-0.309284	-0.0333987	-0.44969	1.89467	2.28957	0.394258	-0.315471
0.01135	2.36864	1.31454	0.27521	-0.85799	3.23078	-2.98134	0.76096	1.70941	1.54215		0.01135	-0.481997	-0.461281	-4.21973	0.108385	2.48473	4.01686	-0.191778	2.68168	0.675638		0.01135	0.467235	0.232481	-0.316647	-0.029747	-0.442608	1.89785	2.28556	0.38748	-0.318574
0.0114	2.33684	1.32368	0.29073	-0.84551	3.26029	-2.99401	0.76331	1.7173	1.52831		0.0114	-3.14988	0.677638	-4.09492	2.33942	0.0508769	-0.023961	0.432287	3.74259	2.75065		0.0114	0.462491	0.230678	-0.323918	-0.0260978	-0.43547	1.90098	2.28147	0.380631	-0.321713
0.01145	2.30462	1.3329	0.30633	-0.83317	3.28936	-3.00631	0.76525	1.72476	1.51487		0.01145	-5.75535	-0.149248	-4.9374	3.18191	-1.36887	0.444088	0.853531	2.35404	0.98767		0.01145	0.457748	0.228847	-0.331095	-0.0224522	-0.428277	1.90405	2.27731	0.37371	-0.324886
0.0115	2.27202	1.3422	0.32201	-0.82098	3.31797	-3.01823	0.76677	1.73179	1.50184		0.0115	-5.36531	-0.804517	-4.62537	1.40332	-0.822814	2.70632	2.41369	0.731473	-1.24336		0.0115	0.453005	0.226989	-0.338179	-0.0188108	-0.421032	1.90705	2.27309	0.366723	-0.328091
0.01155	2.23903	1.35158	0.33777	-0.80894	3.34611	-3.02979	0.76787	1.73837	1.48921		0.01155	-5.08448	0.0847761	-2.65957	0.794856	0.628137	2.65952	4.16108	-1.26554	-2.67871		0.01155	0.448266	0.225107	-0.345169	-0.0151741	-0.413736	1.90999	2.2688	0.359668	-0.331327
0.0116	2.20568	1.36103	0.35361	-0.79706	3.37378	-3.04096	0.76855	1.74451	1.477		0.0116	-6.44182	0.584028	-0.646956	1.37212	3.26481	3.31479	5.48721	-1.62437	-1.08735		0.0116	0.443528	0.223202	-0.352063	-0.0115425	-0.406391	1.91287	2.26445	0.352551	-0.334592
0.01165	2.17195	1.37057	0.36953	-0.78533	3.40095	-3.05175	0.76881	1.75021	1.46521		0.01165	-7.84597	1.3173	-1.13061	3.58755	2.79676	5.81105	4.64473	-0.298234	-1.74261		0.01165	0.438793	0.221277	-0.358863	-0.00791767	-0.398998	1.91569	2.26002	0.345372	-0.337885
0.0117	2.13788	1.38018	0.38554	-0.77376	3.42762	-3.06215	0.76865	1.75544	1.45384		0.0117	-6.90987	3.65755	-5.04662	5.64696	1.76706	6.04507	3.66182	-0.610267	-2.07025		0.0117	0.434063	0.219335	-0.365566	-0.00430037	-0.391559	1.91844	2.25553	0.338133	-0.341207
0.01175	2.10347	1.38986	0.40162	-0.76236	3.45379	-3.07215	0.76806	1.76023	1.44289		0.01175	-6.69145	3.84477	-5.46786	5.36613	2.29751	4.4069	1.96125	-0.610267	-2.74112		0.01175	0.429338	0.217379	-0.372172	-0.00069248	-0.384073	1.92112	2.25098	0.330838	-0.344556
0.0118	2.06872	1.39962	0.41778	-0.75112	3.47944	-3.08177	0.76705	1.76455	1.43237		0.0118	-5.22489	1.45772	-3.09641	4.80447	1.78266	4.4069	-0.0981686	0.653465	-4.84734		0.0118	0.424618	0.21541	-0.378681	0.00290494	-0.376542	1.92373	2.24635	0.323487	-0.347934
0.01185	2.03366	1.40946	0.43403	-0.74006	3.50457	-3.09099	0.76562	1.7684	1.42228		0.01185	-3.21228	0.287597	-2.14471	3.77477	0.394113	4.03246	0.619506	0.450644	-5.29979		0.01185	0.419906	0.213432	-0.385093	0.00649055	-0.368965	1.92627	2.24165	0.316082	-0.351338
0.0119	1.99829	1.41936	0.45035	-0.72916	3.52917	-3.0998	0.76376	1.77178	1.41262		0.0119	-1.21527	0.537223	-5.48346	1.62174	-0.151944	2.59711	0.728718	-1.12512	-2.91274		0.0119	0.415202	0.211445	-0.391407	0.0100639	-0.361346	1.92875	2.23689	0.308625	-0.354767
0.01195	1.96262	1.42933	0.46675	-0.71844	3.55322	-3.10821	0.76147	1.7747	1.40339		0.01195	-1.4493	1.36411	-6.8408	0.248799	-0.136343	1.19297	-0.550616	-2.71649	-0.322866		0.01195	0.410509	0.209452	-0.397624	0.0136243	-0.353682	1.93115	2.23206	0.301119	-0.358221
0.012	1.92666	1.43938	0.48323	-0.7079	3.57673	-3.11622	0.75876	1.77713	1.39461		0.012	-2.19818	3.81357	-7.40246	0.467222	0.0976818	2.17587	1.82083	-2.15483	-0.0108338		0.012	0.405826	0.207457	-0.403744	0.0171708	-0.345977	1.93348	2.22716	0.293565	-0.361697
0.01205	1.89043	1.44949	0.49978	-0.69754	3.59967	-3.12382	0.75562	1.77909	1.38626		0.01205	-3.82075	2.97108	-6.62238	2.23021	1.62664	2.23828	3.63062	-0.891096	0.00476786		0.01205	0.401154	0.20546	-0.409767	0.0207026	-0.338232	1.93573	2.22218	0.285966	-0.365197
0.0121	1.85393	1.45966	0.51641	-0.68736	3.62206	-3.13101	0.75206	1.78057	1.37836		0.0121	-4.64763	0.474817	-5.24944	2.83867	1.82946	1.64541	1.58681	-1.76479	-1.10295		0.0121	0.396493	0.203466	-0.415692	0.0242191	-0.330446	1.93791	2.21714	0.278325	-0.368718
0.01215	1.81719	1.4699	0.53312	-0.67736	3.64387	-3.13779	0.74807	1.78156	1.37091		0.01215	-3.02506	0.740045	-3.61127	3.57195	2.07909	3.424	-0.425803	-2.59167	-1.46179		0.01215	0.391846	0.201475	-0.421519	0.0277202	-0.322621	1.94	2.21203	0.270645	-0.37226
0.0122	1.7802	1.48021	0.54989	-0.66755	3.6651	-3.14416	0.74365	1.78207	1.3639		0.0122	-0.99685	0.927264	-3.89209	3.30672	1.2678	2.31628	0.962742	-1.96761	-1.05614		0.0122	0.387213	0.199491	-0.427246	0.0312044	-0.31476	1.94202	2.20685	0.262927	-0.375822
0.01225	1.74299	1.49058	0.56674	-0.65793	3.68575	-3.15011	0.73881	1.78208	1.35735		0.01225	-1.54291	-1.81862	-4.06371	3.68116	-1.6653	1.91064	2.11726	-0.376243	-1.68021		0.01225	0.382595	0.197517	-0.432873	0.0346714	-0.306864	1.94395	2.2016	0.255176	-0.379402
0.0123	1.70556	1.50101	0.58367	-0.64849	3.7058	-3.15565	0.73355	1.78161	1.35124		0.0123	-3.72714	-2.94194	-2.37874	3.46273	-0.666798	2.86234	2.4761	0.247823	-1.96104		0.0123	0.377994	0.195554	-0.438401	0.0381195	-0.298934	1.9458	2.19628	0.247395	-0.382999
0.01235	1.66793	1.5115	0.60066	-0.63925	3.72525	-3.16077	0.72786	1.78064	1.3456		0.01235	-4.99087	-0.913728	-2.50355	4.22721	1.1898	2.20707	1.89884	1.48035	-2.46029		0.01235	0.37341	0.193606	-0.443829	0.0415476	-0.290971	1.94757	2.19089	0.239584	-0.386613
0.0124	1.63011	1.52205	0.61772	-0.63019	3.7441	-3.16547	0.72175	1.77918	1.3404		0.0124	-1.57411	-0.196053	-3.25243	4.91369	1.67345	2.79993	0.619506	1.32433	-5.05016		0.0124	0.368847	0.191674	-0.449156	0.0449541	-0.282977	1.94924	2.18543	0.231749	-0.390239
0.01245	1.5921	1.53265	0.63485	-0.62133	3.76234	-3.16976	0.71523	1.77722	1.33567		0.01245	-0.294777	-0.118045	-2.78438	2.86987	2.06349	2.61271	-0.87825	0.669066	-5.23738		0.01245	0.364304	0.189761	-0.454384	0.0483369	-0.274953	1.95083	2.1799	0.223889	-0.393879
0.0125	1.55394	1.54331	0.65205	-0.61267	3.77996	-3.17363	0.70828	1.77477	1.3314		0.0125	-2.54141	0.303199	-1.31783	1.55934	2.48473	1.94184	-2.64123	-0.844292	-3.19357		0.0125	0.359783	0.187869	-0.459512	0.0516945	-0.2669	1.95231	2.1743	0.21601	-0.39753
0.01255	1.51561	1.55402	0.66931	-0.60419	3.79695	-3.17708	0.70092	1.77182	1.32758		0.01255	-4.16398	1.36411	-1.70787	2.83867	0.862162	2.81554	-2.45401	-3.18454	-1.24336		0.01255	0.355285	0.186	-0.464537	0.0550253	-0.258821	1.95371	2.16862	0.208115	-0.401192
0.0126	1.47715	1.56479	0.68663	-0.59591	3.81332	-3.18012	0.69314	1.76837	1.32424		0.0126	-4.67883	5.1397	-1.87948	1.77776	0.518926	3.424	-2.09518	-3.04412	-1.21216		0.0126	0.350811	0.184157	-0.469459	0.0583276	-0.250717	1.95501	2.16288	0.200207	-0.404863
0.01265	1.43856	1.57561	0.70401	-0.58783	3.82905	-3.18274	0.68494	1.76442	1.32135		0.01265	-3.78954	7.47995	-0.0696956	0.670043	0.628137	1.92624	-2.73484	-1.32794	-4.56651		0.01265	0.346361	0.18234	-0.474278	0.0615997	-0.242591	1.9562	2.15707	0.192289	-0.408543
0.0127	1.39985	1.58648	0.72146	-0.57994	3.84415	-3.18494	0.67634	1.75997	1.31893		0.0127	-3.96116	7.23032	1.25644	1.1693	0.144487	0.490893	-1.62713	1.04351	-8.18609		0.0127	0.341936	0.18055	-0.478993	0.0648398	-0.234444	1.95731	2.15118	0.184365	-0.41223
0.01275	1.36104	1.59739	0.73896	-0.57225	3.8586	-3.18673	0.66733	1.75502	1.31698		0.01275	-5.14688	4.90568	0.242337	3.54074	-1.6653	-0.538815	-1.65833	0.825083	-6.64153		0.01275	0.337539	0.178791	-0.483603	0.0680464	-0.226278	1.9583	2.14522	0.176438	-0.415921
0.0128	1.32214	1.60836	0.75651	-0.56475	3.87241	-3.18811	0.65791	1.74957	1.31549		0.0128	-5.10008	0.740045	-0.662557	4.57045	-1.02564	-0.97566	-3.45252	0.559855	-2.78792		0.0128	0.33317	0.177063	-0.488107	0.0712179	-0.218094	1.95921	2.13918	0.168508	-0.419616
0.01285	1.28316	1.61936	0.77412	-0.55745	3.88556	-3.18907	0.64809	1.74362	1.31447		0.01285	-2.97826	-3.01995	0.585573	3.68116	0.409714	-0.507611	-0.0357621	1.05911	0.145183		0.01285	0.328831	0.175369	-0.492503	0.0743525	-0.209893	1.96001	2.13306	0.160581	-0.423314
0.0129	1.24412	1.63041	0.79179	-0.55034	3.89806	-3.18962	0.63787	1.73717	1.31393		0.0129	-0.232371	-3.03555	-0.319322	3.89958	1.1898	0.45969	2.19527	0.591058	-0.276061		0.0129	0.324521	0.173712	-0.49679	0.0774486	-0.201679	1.9607	2.12687	0.15266	-0.42701
0.01295	1.20503	1.64151	0.8095	-0.54343	3.90991	-3.18977	0.62725	1.73022	1.31385		0.01295	-2.02656	-0.601696	0.0863207	5.50655	0.768552	-0.804042	2.4917	1.65197	-2.17946		0.01295	0.320243	0.172091	-0.500968	0.0805034	-0.193454	1.9613	2.1206	0.144748	-0.430708
0.013	1.1659	1.65264	0.82725	-0.53672	3.92109	-3.18951	0.61624	1.72278	1.31424		0.013	-3.58672	-1.42858	1.50607	6.20862	-0.854018	0.303673	1.77403	3.55537	-3.00635		0.013	0.315996	0.170509	-0.505036	0.0835152	-0.185219	1.96179	2.11426	0.136847	-0.434405
0.01305	1.12675	1.66382	0.84506	-0.53019	3.9316	-3.18884	0.60483	1.71484	1.3151		0.01305	-2.99386	-0.492484	2.06773	5.74057	-1.58729	3.65802	-0.129372	0.622262	-2.92834		0.01305	0.311781	0.16897	-0.508995	0.0864811	-0.176978	1.96217	2.10783	0.12896	-0.438103
0.0131	1.08758	1.67503	0.8629	-0.52386	3.94145	-3.18777	0.59304	1.7064	1.31643		0.0131	-3.24349	2.39382	2.53578	5.60016	-1.44688	4.3757	-1.81435	-3.21574	-2.94394		0.0131	0.307599	0.167473	-0.512846	0.0893988	-0.168731	1.96244	2.10133	0.121088	-0.441798
0.01315	1.04842	1.68627	0.88078	-0.51772	3.95063	-3.1863	0.58087	1.69748	1.31823		0.01315	-0.981249	2.61224	2.97262	5.72497	-3.22547	1.77023	0.572701	-3.71499	-4.17647		0.01315	0.30345	0.166021	-0.516589	0.0922661	-0.160481	1.96261	2.09475	0.113233	-0.445492
0.0132	1.00927	1.69755	0.89871	-0.51177	3.95914	-3.18444	0.56832	1.68805	1.3205		0.0132	-1.02805	4.71846	1.63088	6.16182	-5.37849	0.288072	1.4932	-1.874	-9.32501		0.0132	0.299336	0.164617	-0.520225	0.0950806	-0.152231	1.96266	2.08809	0.105397	-0.449179
0.01325	0.97015	1.70887	0.91666	-0.50601	3.96697	-3.18218	0.55539	1.67814	1.32324		0.01325	-3.27469	6.65306	2.08333	5.41294	-3.89634	1.75462	-0.0981686	-0.594665	-11.5092		0.01325	0.295257	0.163259	-0.523755	0.0978414	-0.143979	1.96261	2.08135	0.0975782	-0.452859
0.0133	0.93108	1.72021	0.93465	-0.50044	3.97413	-3.17954	0.54209	1.66775	1.32645		0.0133	-3.96116	4.45323	2.81661	3.64995	-1.6029	0.927738	-0.425803	0.403839	-10.854		0.0133	0.291214	0.161949	-0.527181	0.100547	-0.135729	1.96244	2.07454	0.0897814	-0.456533
0.01335	0.89205	1.73158	0.95267	-0.49505	3.98062	-3.1765	0.52842	1.65686	1.33013		0.01335	-4.3512	1.14569	4.93843	2.63585	1.11179	-0.242384	-0.628624	-1.45276	-7.53082		0.01335	0.287208	0.160689	-0.530501	0.103195	-0.127481	1.96216	2.06764	0.0820061	-0.460197
0.0134	0.8531	1.74299	0.97071	-0.48985	3.98642	-3.17309	0.51439	1.64549	1.33427		0.0134	-4.22639	-0.336468	3.20665	-0.000826886	2.06349	2.61271	-1.40871	-2.73209	-3.56801		0.0134	0.283241	0.15948	-0.533717	0.105784	-0.119237	1.96176	2.06068	0.0742567	-0.463853
0.01345	0.81423	1.75441	0.98878	-0.48483	3.99155	-3.16929	0.5	1.63365	1.33889		0.01345	-3.58672	-1.70941	-0.319322	-1.82622	1.37702	4.4225	-1.64273	-3.37176	-2.78792		0.01345	0.279314	0.158325	-0.536829	0.108311	-0.110999	1.96125	2.05363	0.0665334	-0.4675
0.0135	0.77545	1.76587	1.00686	-0.47999	3.996	-3.16512	0.48526	1.62132	1.34397		0.0135	-3.85195	-1.66261	-2.89359	-1.6546	-0.557587	3.68923	-2.25119	-3.8086	-3.97365		0.0135	0.275429	0.157225	-0.539835	0.110775	-0.102771	1.96062	2.0465	0.058839	-0.471136
0.01355	0.73678	1.77734	1.02497	-0.47533	3.99976	-3.16058	0.47018	1.60852	1.34952		0.01355	-3.86755	-2.16186	0.491963	-0.344063	-3.86513	1.80143	-2.37601	-4.83831	-5.81464		0.01355	0.271586	0.156182	-0.542739	0.113176	-0.0945539	1.95987	2.0393	0.0511741	-0.47476
0.0136	0.69824	1.78884	1.04308	-0.47084	4.00285	-3.15567	0.45475	1.59525	1.35553		0.0136	-2.94705	-2.5831	3.50308	2.85427	-3.91194	2.20707	1.46199	-5.15034	-5.25298		0.0136	0.267788	0.155198	-0.545538	0.115511	-0.0863516	1.959	2.03202	0.043541	-0.478369
0.01365	0.65982	1.80036	1.06121	-0.46653	4.00526	-3.15041	0.43898	1.58151	1.36201		0.01365	-1.57411	-2.66111	2.59818	5.959	-1.77451	2.70632	3.61502	-2.40445	-2.67871		0.01365	0.264035	0.154274	-0.548233	0.11778	-0.0781655	1.95801	2.02466	0.0359411	-0.481961
0.0137	0.62156	1.81189	1.07935	-0.46239	4.007	-3.14478	0.42288	1.56731	1.36895		0.0137	-1.37129	-1.30377	0.601174	5.63136	-1.40007	2.42549	2.16407	-1.43715	-1.68021		0.0137	0.260331	0.153411	-0.550825	0.119981	-0.0699972	1.95689	2.01722	0.028375	-0.485534
0.01375	0.58346	1.82344	1.09749	-0.45841	4.00805	-3.1388	0.40645	1.55265	1.37635		0.01375	-2.74423	0.677638	0.164329	4.57045	-2.39858	0.646909	0.182661	-1.17193	-2.92834		0.01375	0.256674	0.15261	-0.553314	0.122113	-0.0618485	1.95566	2.00971	0.0208455	-0.489086
0.0138	0.54553	1.83501	1.11564	-0.4546	4.00843	-3.13248	0.38971	1.53754	1.38421		0.0138	-3.86755	2.40942	0.00831255	6.0214	-2.83542	-0.710433	0.104653	-1.09392	-6.92236		0.0138	0.253066	0.151873	-0.555703	0.124172	-0.0537233	1.9543	2.00211	0.0133516	-0.492617
0.01385	0.50779	1.84659	1.13378	-0.45095	4.00813	-3.12582	0.37265	1.52197	1.39252		0.01385	-2.51021	2.30021	1.36565	6.45825	-2.11775	-0.117571	0.46349	-0.313836	-8.48252		0.01385	0.249506	0.151201	-0.557991	0.126159	-0.0456236	1.95281	1.99444	0.00589518	-0.496124
0.0139	0.47025	1.85818	1.15191	-0.44747	4.00716	-3.11881	0.35528	1.50595	1.40129		0.0139	-2.29179	3.09589	3.26905	3.96199	-1.58729	1.03695	0.775523	-2.26404	-9.32501		0.0139	0.245994	0.150596	-0.560179	0.128071	-0.0375513	1.95121	1.9867	-0.00152437	-0.499607
0.01395	0.43292	1.86978	1.17003	-0.44413	4.00552	-3.11148	0.33761	1.4895	1.41052		0.01395	-4.56962	4.81207	3.81511	1.84017	-1.52489	2.76873	-0.378998	-3.96462	-10.6511		0.01395	0.24253	0.15006	-0.562267	0.129907	-0.0295092	1.94947	1.97887	-0.00890453	-0.503062
0.014	0.39582	1.88139	1.18815	-0.44095	4.00321	-3.10383	0.31964	1.4726	1.42019		0.014	-4.24199	3.75116	2.98822	1.65295	0.160088	3.34599	0.104653	-3.05972	-8.37331		0.014	0.239115	0.149594	-0.564255	0.131664	-0.0214997	1.94761	1.97098	-0.0162452	-0.50649
0.01405	0.35896	1.89301	1.20624	-0.43792	4.00023	-3.09586	0.30138	1.45527	1.43032		0.01405	-2.55701	1.3173	2.98822	1.46573	1.89187	1.5206	-0.597421	-3.93341	-4.84734		0.01405	0.235748	0.149199	-0.566145	0.133343	-0.0135258	1.94561	1.963	-0.0235443	-0.50989
0.0141	0.32235	1.90463	1.22432	-0.43504	3.99659	-3.08757	0.28284	1.43752	1.44089		0.0141	-0.887639	-0.445679	5.34407	2.49543	1.36141	-0.476408	-3.45252	-2.49806	-4.19207		0.0141	0.232429	0.148877	-0.567934	0.134941	-0.0055914	1.94349	1.95496	-0.0308015	-0.513261
0.01415	0.286	1.91626	1.24237	-0.43229	3.99228	-3.07898	0.26403	1.41934	1.4519		0.01415	2.26389	-0.25846	6.46739	3.61875	0.518926	-0.367197	-5.27791	-1.10952	-5.64302		0.01415	0.22916	0.148631	-0.569624	0.136457	0.0023021	1.94124	1.94685	-0.0380147	-0.516602
0.0142	0.24994	1.92789	1.26039	-0.42969	3.98732	-3.07009	0.24494	1.40075	1.46335		0.0142	0.953353	0.584028	6.21776	5.49095	-0.198749	-1.11608	-5.41832	-0.0330068	-8.09248		0.0142	0.225941	0.148461	-0.571213	0.13789	0.0101526	1.93886	1.93867	-0.045184	-0.519914
0.01425	0.21416	1.93952	1.27838	-0.42721	3.98171	-3.0609	0.2256	1.38174	1.47525		0.01425	-2.60382	0.942866	3.31586	4.57045	-2.49219	-0.429603	-5.48073	-0.0954133	-7.46841		0.01425	0.222772	0.148371	-0.572705	0.139239	0.0179574	1.93635	1.93042	-0.052307	-0.523196
0.0143	0.17869	1.95114	1.29633	-0.42487	3.97544	-3.05143	0.20599	1.36233	1.48758		0.0143	-5.92697	1.53573	1.19404	2.51104	-2.32057	2.01985	-0.457006	0.887489	-6.51671		0.0143	0.219653	0.14836	-0.574096	0.140505	0.0257146	1.93371	1.92211	-0.0593846	-0.526448
0.01435	0.14353	1.96277	1.31425	-0.42265	3.96852	-3.04168	0.18614	1.34252	1.50034		0.01435	-5.3185	0.864858	0.94441	4.28962	-2.53899	3.97006	1.19677	3.49296	-8.62293		0.01435	0.216586	0.148429	-0.575387	0.141685	0.033419	1.93094	1.91373	-0.0664135	-0.529668
0.0144	0.10869	1.97439	1.33212	-0.42056	3.96097	-3.03166	0.16605	1.32232	1.51353		0.0144	-3.13427	-0.539289	1.52167	6.70787	-3.11625	2.97155	-1.20588	4.8347	-9.43422		0.0144	0.213572	0.148579	-0.576578	0.142779	0.0410686	1.92803	1.90529	-0.0733921	-0.532856
0.01445	0.0742	1.98601	1.34994	-0.41858	3.95277	-3.02137	0.14572	1.30173	1.52714		0.01445	-2.21378	-0.320866	4.25196	7.98721	0.128885	0.94334	-2.20439	4.53827	-7.79605		0.01445	0.210611	0.14881	-0.577671	0.143785	0.0486604	1.925	1.89678	-0.0803181	-0.536012
0.0145	0.04006	1.99761	1.36771	-0.41672	3.94394	-3.01082	0.12517	1.28076	1.54118		0.0145	-1.80814	-0.133647	6.28017	8.64248	3.07759	4.99976	-2.07958	3.08732	-6.11107		0.0145	0.207705	0.149123	-0.578664	0.144702	0.0561928	1.92184	1.88822	-0.0871892	-0.539135
0.01455	0.00628	2.00921	1.38542	-0.41496	3.93449	-3.00002	0.1044	1.25942	1.55564		0.01455	-1.82374	1.89457	4.01793	9.36015	1.221	8.05768	-4.07658	1.21512	-6.56352		0.01455	0.204856	0.149519	-0.579561	0.145529	0.0636644	1.91854	1.8796	-0.0940047	-0.542224
0.0146	-0.02712	2.0208	1.40307	-0.41331	3.92441	-2.98898	0.08342	1.2377	1.57051		0.0146	-1.65212	1.87896	0.0863207	6.9263	-1.38447	6.87196	-5.10629	0.294627	-7.20318		0.0146	0.202065	0.149999	-0.580361	0.146263	0.0710712	1.91512	1.87093	-0.100763	-0.545278
0.01465	-0.06014	2.03238	1.42066	-0.41175	3.91371	-2.9777	0.06224	1.21563	1.58579		0.01465	-1.24648	-0.944931	2.67619	3.88398	0.440918	2.87794	-4.04538	-0.875495	-5.54941		0.01465	0.199332	0.150564	-0.581065	0.146904	0.0784127	1.91157	1.86221	-0.107463	-0.548295
0.0147	-0.09276	2.04395	1.43817	-0.41029	3.9024	-2.96619	0.04086	1.19321	1.60148		0.0147	-1.58971	-0.539289	4.96963	2.01178	2.07909	0.537698	-2.95327	-0.345039	-5.4558		0.0147	0.196659	0.151213	-0.581675	0.147449	0.0856871	1.90788	1.85344	-0.114104	-0.551276
0.01475	-0.12497	2.0555	1.45562	-0.40892	3.89048	-2.95446	0.0193	1.17044	1.61757		0.01475	-3.80514	0.209589	2.61378	2.62025	2.96838	0.147657	-1.54912	-0.376243	-7.60883		0.01475	0.194048	0.151947	-0.582189	0.147898	0.0928946	1.90407	1.84462	-0.120684	-0.554219
0.0148	-0.15675	2.06703	1.47298	-0.40763	3.87797	-2.94252	-0.00245	1.14733	1.63406		0.0148	-5.59933	0.646435	-1.72347	1.99618	0.425316	0.600104	-2.3448	-1.40595	-7.3592		0.0148	0.1915	0.152768	-0.582611	0.14825	0.100033	1.90012	1.83576	-0.127205	-0.557122
0.01485	-0.18811	2.07855	1.49027	-0.40643	3.86486	-2.93037	-0.02436	1.12389	1.65094		0.01485	-6.41062	0.802451	-2.26953	1.51253	-1.38447	0.00724228	-3.51493	-3.37176	-5.08136		0.01485	0.189016	0.153674	-0.582939	0.148503	0.107103	1.89604	1.82685	-0.133664	-0.559983
0.0149	-0.21902	2.09004	1.50746	-0.40529	3.85116	-2.91802	-0.04644	1.10013	1.66822		0.0149	-5.20929	0.474817	-0.054094	3.69676	-1.79012	-0.538815	-4.46662	-3.7774	-3.56801		0.0149	0.186598	0.154667	-0.583174	0.148655	0.114101	1.89184	1.81791	-0.14006	-0.562801
0.01495	-0.24948	2.10152	1.52457	-0.40423	3.83688	-2.90548	-0.06866	1.07605	1.68588		0.01495	-3.60232	-1.45979	1.74009	5.92779	-1.47808	0.553299	-3.14049	-2.15483	-3.84883		0.01495	0.184248	0.155747	-0.583315	0.148703	0.121024	1.8875	1.80893	-0.146394	-0.565573
0.015	-0.27947	2.11297	1.54158	-0.40323	3.82203	-2.89276	-0.09104	1.05166	1.70392		0.015	-1.80814	-2.31787	3.53428	5.53775	-1.22846	3.92325	-1.72074	2.18242	-4.66012		0.015	0.181968	0.156914	-0.583364	0.148647	0.127873	1.88304	1.79992	-0.152663	-0.568298
0.01505	-0.30899	2.1244	1.55849	-0.40229	3.80661	-2.87987	-0.11355	1.02697	1.72234		0.01505	-1.4337	-2.02144	3.01943	5.0385	0.503324	5.20258	0.510295	3.55537	-5.4246		0.01505	0.179761	0.158167	-0.583322	0.148487	0.134647	1.87845	1.79087	-0.158868	-0.570974
0.0151	-0.33803	2.13581	1.57529	-0.4014	3.79064	-2.86681	-0.13619	1.00198	1.74112		0.0151	-2.90025	-1.50659	1.88051	5.60016	1.17419	5.15578	4.97236	0.497449	-4.00485		0.0151	0.177627	0.159508	-0.58319	0.148224	0.141344	1.87373	1.7818	-0.165006	-0.573602
0.01515	-0.36656	2.14719	1.59199	-0.40056	3.77411	-2.8536	-0.15895	0.97671	1.76027		0.01515	-1.30888	-1.75622	0.0239142	5.53775	-1.77451	6.2791	3.83344	-1.874	-4.06726		0.01515	0.175569	0.160936	-0.58297	0.147857	0.147964	1.86889	1.77269	-0.171081	-0.576178
0.0152	-0.39459	2.15854	1.60857	-0.39977	3.75704	-2.84023	-0.18182	0.95117	1.77979		0.0152	-1.4493	-1.31937	-0.00728908	4.41443	-4.4892	5.85785	2.89734	-2.71649	-6.71953		0.0152	0.173586	0.162452	-0.582664	0.147387	0.154505	1.86392	1.76356	-0.17709	-0.5787
0.01525	-0.42211	2.16987	1.62503	-0.39901	3.73943	-2.82672	-0.20479	0.92536	1.79966		0.01525	-2.05776	-3.26957	1.22524	4.14921	-4.39559	2.84674	4.30149	-3.15333	-6.96916		0.01525	0.171679	0.164057	-0.582273	0.146814	0.160967	1.85882	1.7544	-0.183033	-0.581167
0.0153	-0.4491	2.18116	1.64137	-0.39828	3.7213	-2.81309	-0.22786	0.89928	1.81987		0.0153	-2.29179	-4.61131	0.601174	7.50356	-1.49368	0.288072	4.56672	-2.21723	-7.01597		0.0153	0.169849	0.16575	-0.581799	0.146139	0.167348	1.85361	1.74523	-0.18891	-0.583578
0.01535	-0.47556	2.19242	1.65758	-0.39758	3.70264	-2.79932	-0.25101	0.87296	1.84044		0.01535	-2.4478	-3.40999	2.02092	7.30074	0.440918	0.568901	1.33718	-1.71798	-7.95206		0.01535	0.168094	0.167533	-0.581244	0.145362	0.173646	1.84826	1.73603	-0.194717	-0.585931
0.0154	-0.50147	2.20365	1.67365	-0.39689	3.68348	-2.78544	-0.27423	0.84639	1.86134		0.0154	-3.77394	-1.75622	3.48748	4.58605	0.0352753	-0.538815	0.323075	-2.18603	-8.3421		0.0154	0.166416	0.169407	-0.580609	0.144484	0.179859	1.84279	1.72682	-0.200455	-0.588225
0.01545	-0.52683	2.21485	1.68959	-0.39623	3.66381	-2.77146	-0.29752	0.81959	1.88257		0.01545	-3.58672	-1.6158	3.39387	3.72796	-0.339164	-2.73864	1.29038	-1.62437	-8.01447		0.01545	0.164814	0.171372	-0.579894	0.143506	0.185988	1.8372	1.7176	-0.20612	-0.590459
0.0155	-0.55163	2.226	1.70539	-0.39557	3.64366	-2.75737	-0.32087	0.79256	1.90413		0.0155	-1.82374	-2.81713	0.476361	4.00879	2.87477	-3.90877	2.95975	-1.56197	-6.96916		0.0155	0.163288	0.173428	-0.579106	0.14243	0.192031	1.83149	1.70836	-0.211711	-0.592633
0.01555	-0.57585	2.23713	1.72104	-0.39491	3.62301	-2.7432	-0.34427	0.76532	1.92601		0.01555	0.438499	-5.11057	-1.13061	4.53925	5.059	-2.52022	3.72423	-1.48396	-5.33099		0.01555	0.161839	0.175575	-0.578243	0.141256	0.197988	1.82565	1.69912	-0.217226	-0.594746
0.0156	-0.5995	2.24821	1.73655	-0.39426	3.6019	-2.72894	-0.3677	0.73786	1.94821		0.0156	0.110865	-3.89364	0.0551174	3.96199	3.59245	0.865332	1.82083	-0.189023	-5.26858		0.0156	0.160469	0.177813	-0.577311	0.139985	0.203858	1.8197	1.68987	-0.222662	-0.596796
0.01565	-0.62256	2.25926	1.75189	-0.39359	3.58032	-2.71461	-0.39117	0.71021	1.97071		0.01565	-1.4337	-1.88103	2.89461	5.0853	0.674942	0.522096	-0.254185	0.559855	-7.20318		0.01565	0.159178	0.180142	-0.57631	0.138617	0.209641	1.81364	1.68062	-0.228019	-0.598782
0.0157	-0.64503	2.27027	1.76707	-0.39291	3.55828	-2.70021	-0.41466	0.68236	1.99352		0.0157	-2.66622	-3.12916	2.98822	7.05111	-2.00854	0.958942	0.541498	-1.04711	-7.01597		0.0157	0.157966	0.182561	-0.575239	0.137153	0.215336	1.80746	1.67136	-0.233293	-0.600704
0.01575	-0.66689	2.28123	1.78209	-0.39222	3.5358	-2.68575	-0.43816	0.65434	2.01663		0.01575	-4.28879	-3.4724	0.710386	7.70638	-1.11925	2.25388	1.5556	-0.844292	-6.32949		0.01575	0.156833	0.185072	-0.574099	0.135593	0.220946	1.80117	1.6621	-0.238486	-0.602558
0.0158	-0.68814	2.29215	1.79694	-0.39149	3.51288	-2.67125	-0.46166	0.62614	2.04002		0.0158	-2.54141	-4.72053	0.351548	7.33194	0.503324	4.04806	3.02216	1.09031	-7.67123		0.0158	0.155779	0.187679	-0.57289	0.133937	0.226469	1.79477	1.65284	-0.243596	-0.604344
0.01585	-0.70878	2.30303	1.81162	-0.39074	3.48953	-2.65671	-0.48516	0.59778	2.0637		0.01585	-2.72863	-5.4538	2.00532	5.959	1.40822	4.98416	2.27328	0.388237	-8.76335		0.01585	0.154803	0.190381	-0.571614	0.132185	0.231907	1.78826	1.64358	-0.248622	-0.606062
0.0159	-0.72878	2.31386	1.82611	-0.38995	3.46577	-2.64213	-0.50864	0.56926	2.08765		0.0159	-4.22639	-5.73463	3.14424	6.75468	1.86067	4.68773	-0.0045588	-0.313836	-7.23439		0.0159	0.153905	0.193182	-0.570271	0.130337	0.237262	1.78163	1.63432	-0.253564	-0.607708
0.01595	-0.74816	2.32465	1.84042	-0.38912	3.4416	-2.62754	-0.5321	0.5406	2.11187		0.01595	-6.39501	-8.80815	3.08183	4.99169	0.487723	4.46931	-1.3931	1.964	-5.15937		0.01595	0.153084	0.196081	-0.568864	0.128392	0.242535	1.7749	1.62507	-0.258419	-0.609285
0.016	-0.7669	2.33539	1.85454	-0.38824	3.41704	-2.61292	-0.55552	0.5118	2.13636		0.016	-6.51983	-8.73014	3.20665	4.30522	-1.18165	4.14167	-1.47111	3.07172	-4.67572		0.016	0.152341	0.19908	-0.567393	0.12635	0.247726	1.76806	1.61582	-0.263186	-0.610791
0.01605	-0.78499	2.34608	1.86847	-0.3873	3.39209	-2.5983	-0.5789	0.48287	2.1611		0.01605	-5.2873	-8.85496	3.56548	5.53775	-1.40007	2.4567	-1.65833	2.96251	-4.31688		0.01605	0.151676	0.20218	-0.565859	0.124211	0.252837	1.76111	1.60658	-0.267862	-0.612223
0.0161	-0.80243	2.35673	1.88221	-0.38631	3.36677	-2.58368	-0.60223	0.45383	2.18609		0.0161	-5.11568	-8.85496	2.83221	8.03401	-1.49368	0.27247	-0.363396	2.33844	-5.33099		0.0161	0.151089	0.205381	-0.564265	0.121976	0.257867	1.75405	1.59735	-0.272449	-0.61358
0.01615	-0.81921	2.36732	1.89573	-0.38525	3.34108	-2.56907	-0.6255	0.42467	2.21132		0.01615	-5.95817	-7.76284	1.14723	8.58007	-0.183148	0.662511	0.385482	2.71288	-4.69132		0.01615	0.150582	0.208682	-0.56261	0.119647	0.262817	1.74688	1.58812	-0.276943	-0.614862
0.0162	-0.83533	2.37786	1.90906	-0.38412	3.31503	-2.55448	-0.64869	0.39542	2.23679		0.0162	-3.63353	-8.35571	1.27204	8.23683	2.06349	2.11346	-0.30099	0.0293997	-3.22477		0.0162	0.150152	0.212083	-0.560897	0.117224	0.267687	1.73961	1.57891	-0.281345	-0.616066
0.01625	-0.85078	2.38835	1.92217	-0.38291	3.28865	-2.53992	-0.67181	0.36608	2.26248		0.01625	-1.15287	-9.19819	1.97412	6.13061	2.89037	1.505	-1.76754	-3.69939	-2.70992		0.01625	0.149799	0.215583	-0.559126	0.114706	0.272475	1.73224	1.56972	-0.285652	-0.617191
0.0163	-0.86556	2.39879	1.93506	-0.38162	3.26193	-2.52538	-0.69484	0.33666	2.2884		0.0163	-3.18108	-8.63653	1.24084	3.82157	0.75295	1.91064	-2.04837	-4.46387	-2.61631		0.0163	0.149523	0.219184	-0.557301	0.112093	0.277182	1.72477	1.56053	-0.289865	-0.618234
0.01635	-0.87965	2.40917	1.94774	-0.38025	3.23489	-2.51089	-0.71777	0.30716	2.31452		0.01635	-5.3029	-6.4367	1.72449	4.43004	-0.370367	3.92325	-2.51642	-3.73059	-2.35108		0.01635	0.149324	0.222884	-0.55542	0.109386	0.281807	1.71719	1.55137	-0.293984	-0.619197
0.0164	-0.89307	2.4195	1.96019	-0.37878	3.20754	-2.49645	-0.7406	0.2776	2.34086		0.0164	-4.52282	-6.06227	-1.34903	4.58605	-0.151944	4.71893	-2.87526	-2.76329	-3.09996		0.0164	0.149203	0.226682	-0.553486	0.106587	0.28635	1.70952	1.54223	-0.298008	-0.620078
0.01645	-0.90579	2.42977	1.97241	-0.37721	3.1799	-2.48207	-0.76331	0.24799	2.36738		0.01645	-2.79104	-7.46641	-2.08231	1.94938	-1.82132	3.4396	0.494693	-1.32794	-2.99074		0.01645	0.149159	0.230579	-0.551499	0.103698	0.290812	1.70175	1.53311	-0.301934	-0.620875
0.0165	-0.91782	2.43999	1.9844	-0.37554	3.15196	-2.46775	-0.7859	0.21833	2.3941		0.0165	-4.88166	-6.98276	-2.22272	1.54373	-3.20986	4.15728	1.99245	1.09031	-2.74112		0.0165	0.149191	0.234574	-0.549459	0.100717	0.295193	1.69389	1.52401	-0.30576	-0.621587
0.01655	-0.92916	2.45014	1.99615	-0.37376	3.12375	-2.4535	-0.80835	0.18864	2.421		0.01655	-7.2063	-6.06227	-0.724964	4.57045	-1.77451	3.86084	0.276271	3.57097	-1.6334		0.01655	0.149299	0.238666	-0.547366	0.0976473	0.299492	1.68593	1.51494	-0.309484	-0.622215
0.0166	-0.93979	2.46024	2.00765	-0.37186	3.09527	-2.43934	-0.83066	0.15893	2.44808		0.0166	-6.98788	-3.84683	1.17843	5.91219	-1.49368	2.65952	-1.48671	3.05612	-3.28718		0.0166	0.149482	0.242857	-0.545223	0.0944891	0.30371	1.67789	1.5059	-0.313104	-0.622757
0.01665	-0.94972	2.47028	2.01891	-0.36984	3.06654	-2.42526	-0.85282	0.12919	2.47532		0.01665	-5.22489	-3.16036	-0.475338	3.18191	-1.97733	2.4879	0.229466	2.57247	-2.99074		0.01665	0.149739	0.247146	-0.543029	0.0912437	0.307848	1.66975	1.49688	-0.316619	-0.623211
0.0167	-0.95894	2.48026	2.02992	-0.3677	3.03757	-2.41127	-0.87482	0.09945	2.50272		0.0167	-4.50722	-3.89364	-3.12761	0.311206	-2.08655	3.37719	2.28888	3.27454	-2.03905		0.0167	0.150069	0.251534	-0.540788	0.0879109	0.311904	1.66153	1.4879	-0.320027	-0.623576
0.01675	-0.96746	2.49018	2.04068	-0.36543	3.00836	-2.39739	-0.89665	0.06971	2.53027		0.01675	-4.52282	-6.18708	-3.37724	-0.234851	-2.6326	3.98566	2.77253	1.9016	-1.6178		0.01675	0.150473	0.256021	-0.538501	0.0844899	0.315879	1.65323	1.47895	-0.32333	-0.623851
0.0168	-0.97525	2.50004	2.05117	-0.36303	2.97894	-2.38362	-0.91831	0.03998	2.55796		0.0168	-5.3029	-4.89214	-1.56745	1.2317	-2.77302	2.34749	2.81934	-0.797487	-2.38228		0.0168	0.15095	0.260606	-0.536169	0.080981	0.319774	1.64483	1.47004	-0.326526	-0.624034
0.01685	-0.98234	2.50983	2.06141	-0.36048	2.9493	-2.36996	-0.93978	0.01028	2.58579		0.01685	-4.89726	-3.72202	2.34856	3.49394	-0.869619	1.36458	3.67743	0.201018	-2.44469		0.01685	0.151499	0.265289	-0.533796	0.0773839	0.323589	1.63636	1.46117	-0.329614	-0.624125
0.0169	-0.9887	2.51956	2.07137	-0.35779	2.91947	-2.35643	-0.96106	-0.0194	2.61374		0.0169	-3.86755	-5.14177	2.53578	4.118	2.01668	3.31479	5.42481	0.0450013	-1.16535		0.0169	0.152121	0.27007	-0.531381	0.0736983	0.327324	1.6278	1.45234	-0.332592	-0.624125
0.01695	-0.99435	2.52923	2.08107	-0.35495	2.88946	-2.34303	-0.98214	-0.04905	2.64181		0.01695	-2.61942	-6.60832	0.788394	3.36912	1.96988	4.3445	5.98647	-0.969105	-0.806517		0.01695	0.152814	0.274948	-0.528927	0.0699242	0.330981	1.61916	1.44355	-0.335459	-0.624032
0.017	-0.99927	2.53883	2.09049	-0.35195	2.85927	-2.32976	-1.003	-0.07864	2.66999		0.017	-2.3854	-6.67073	-2.34753	3.04149	1.36141	1.80143	3.17817	-0.0954133	-2.02344		0.017	0.153577	0.279925	-0.526435	0.066062	0.334563	1.61045	1.43481	-0.338214	-0.623845
0.01705	-1.00348	2.54837	2.09963	-0.34879	2.82891	-2.31664	-1.02365	-0.10818	2.69827		0.01705	-2.74423	-5.87505	-7.24644	2.69825	-0.417172	0.428486	0.837929	3.53977	-3.14676		0.01705	0.15441	0.284996	-0.523906	0.0621125	0.338068	1.60166	1.42611	-0.340856	-0.623564
0.0171	-1.00695	2.55784	2.10849	-0.34547	2.79841	-2.30367	-1.04407	-0.13766	2.72665		0.0171	-3.30589	-4.08086	-6.91881	2.77626	-1.94613	2.19147	0.931539	3.53977	-4.56651		0.0171	0.155313	0.290163	-0.521345	0.0580766	0.341498	1.5928	1.41745	-0.343383	-0.623188
0.01715	-1.00971	2.56724	2.11706	-0.34198	2.76776	-2.29085	-1.06426	-0.16706	2.75511		0.01715	-5.17809	-4.34609	-3.64247	1.46573	-4.39559	2.36309	1.4776	2.57247	-4.58211		0.01715	0.156284	0.295424	-0.518749	0.0539558	0.344853	1.58386	1.40885	-0.345796	-0.622716
0.0172	-1.01174	2.57658	2.12534	-0.33832	2.73699	-2.27819	-1.08421	-0.19638	2.78365		0.0172	-4.08597	-4.31488	-0.459736	2.35502	-6.4082	3.4084	0.198262	3.25894	-3.70842		0.0172	0.157326	0.300777	-0.51612	0.049751	0.348132	1.57486	1.40029	-0.348094	-0.622147
0.01725	-1.01304	2.58584	2.13333	-0.33448	2.7061	-2.26571	-1.1039	-0.22561	2.81225		0.01725	-1.37129	-3.97165	-1.80148	3.21311	-5.36289	3.68923	-0.737835	3.46176	-1.16535		0.01725	0.158436	0.306223	-0.513464	0.0454632	0.351337	1.56579	1.39178	-0.350275	-0.621484
0.0173	-1.01361	2.59504	2.14102	-0.33046	2.6751	-2.2534	-1.12334	-0.25474	2.84091		0.0173	-1.85494	-3.26957	-3.25243	2.49543	-0.370367	2.5191	2.83494	5.67719	-0.432078		0.0173	0.159614	0.31176	-0.510779	0.0410936	0.354469	1.55666	1.38332	-0.352339	-0.620725
0.01735	-1.01346	2.60417	2.14841	-0.32626	2.64401	-2.24126	-1.14251	-0.28377	2.86963		0.01735	-4.46041	-2.73912	-0.97459	1.52813	3.43643	4.50051	6.89136	5.09993	-1.5866		0.01735	0.160862	0.317389	-0.50807	0.0366434	0.357527	1.54746	1.37491	-0.354284	-0.619871
0.0174	-1.01259	2.61323	2.15549	-0.32186	2.61284	-2.22932	-1.16141	-0.31268	2.89839		0.0174	-4.71004	-4.29928	0.304743	1.2473	1.11179	6.38831	7.39061	2.16682	0.831654		0.0174	0.162177	0.323107	-0.505337	0.0321139	0.360511	1.53821	1.36656	-0.356111	-0.618924
0.01745	-1.01099	2.62222	2.16227	-0.31727	2.5816	-2.21756	-1.18003	-0.34146	2.92718		0.01745	-5.06888	-5.85944	0.819597	0.670043	-1.38447	3.73603	6.82895	0.840684	0.613231		0.01745	0.163561	0.328916	-0.502582	0.0275064	0.363421	1.5289	1.35827	-0.357817	-0.617884
0.0175	-1.00867	2.63114	2.16874	-0.31249	2.55029	-2.206	-1.19837	-0.37012	2.95599		0.0175	-5.3341	-4.79853	1.8025	2.1366	-0.0583345	2.12906	7.45302	-0.360641	-4.09846		0.0175	0.165013	0.334816	-0.499807	0.0228215	0.366255	1.51954	1.35004	-0.359402	-0.616753
0.01755	-1.00562	2.63999	2.17489	-0.3075	2.51893	-2.19464	-1.21641	-0.39863	2.98483		0.01755	-6.95667	-3.92484	0.0239142	3.32232	-0.635595	4.03246	3.75543	-3.37176	-6.28269		0.01755	0.166534	0.340806	-0.497017	0.0180608	0.369016	1.51013	1.34187	-0.360866	-0.615532
0.0176	-1.00185	2.64877	2.18073	-0.30231	2.48754	-2.18349	-1.23415	-0.42699	3.01367		0.0176	-8.36082	-3.84683	-3.17442	1.45012	-1.47808	4.45371	2.03925	-5.36876	-3.66161		0.0176	0.168122	0.346885	-0.494212	0.0132254	0.371701	1.50068	1.33376	-0.362208	-0.614222
0.01765	-0.99737	2.65747	2.18624	-0.29691	2.45612	-2.17255	-1.25158	-0.4552	3.04251		0.01765	-8.11119	-3.34758	-3.72048	1.99618	-0.339164	3.01836	2.35129	-5.18154	-0.83772		0.01765	0.169777	0.353052	-0.491395	0.00831563	0.374313	1.49118	1.32572	-0.363426	-0.612823
0.0177	-0.99217	2.6661	2.19144	-0.2913	2.42468	-2.16183	-1.26869	-0.48325	3.07134		0.0177	-6.02057	-1.86543	-2.58156	2.82307	0.737349	2.19147	4.23908	-4.33906	0.566426		0.0177	0.171501	0.359306	-0.488568	0.00333228	0.376851	1.48164	1.31774	-0.364521	-0.611336
0.01775	-0.98625	2.67465	2.1963	-0.28547	2.39324	-2.15132	-1.28549	-0.51112	3.10015		0.01775	-3.18108	-0.820118	-3.68927	2.10539	1.95428	4.3601	2.92855	-4.51067	0.441613		0.01775	0.173295	0.365645	-0.485731	-0.00172465	0.379315	1.47207	1.30983	-0.365491	-0.609761
0.0178	-0.97962	2.68314	2.20084	-0.27943	2.3618	-2.14105	-1.30196	-0.53881	3.12894		0.0178	-3.4307	0.708841	-7.40246	1.62174	2.82797	5.28059	-0.160575	-5.66519	-1.71141		0.0178	0.175158	0.372066	-0.482885	-0.00685493	0.381707	1.46247	1.30199	-0.366337	-0.608101
0.01785	-0.97228	2.69154	2.20505	-0.27317	2.33038	-2.131	-1.31809	-0.56632	3.15769		0.01785	-2.65062	0.677638	-8.22935	2.80747	2.11029	2.89354	-1.11227	-6.47648	-2.89714		0.01785	0.177091	0.37857	-0.480033	-0.0120589	0.384025	1.45283	1.29422	-0.367058	-0.606355
0.0179	-0.96424	2.69988	2.20892	-0.26669	2.29899	-2.12118	-1.33389	-0.59363	3.1864		0.0179	-1.99535	-2.16186	-7.57408	4.19601	-1.11925	3.11197	0.338677	-7.24096	-2.35108		0.0179	0.179095	0.385152	-0.477174	-0.0173356	0.38627	1.44316	1.28652	-0.367654	-0.604523
0.01795	-0.95549	2.70813	2.21246	-0.25998	2.26763	-2.1116	-1.34933	-0.62074	3.21506		0.01795	-3.32149	-5.81264	-7.7925	4.33643	-2.89783	5.98267	2.89734	-7.78702	-0.978135		0.01795	0.181169	0.391813	-0.474312	-0.0226833	0.388444	1.43347	1.27889	-0.368127	-0.602607
0.018	-0.94604	2.71631	2.21565	-0.25304	2.23632	-2.10227	-1.36443	-0.64764	3.24366		0.018	-5.2561	-4.84534	-8.7286	2.91668	-2.52339	8.13569	5.42481	-8.50469	0.535223		0.018	0.183315	0.398549	-0.471446	-0.0281011	0.390547	1.42376	1.27134	-0.368477	-0.600606
0.01805	-0.9359	2.72442	2.21851	-0.24587	2.20507	-2.09317	-1.37917	-0.67433	3.27218		0.01805	-6.12979	-2.05265	-8.36976	3.1195	-3.27227	4.78134	5.48721	-7.83382	-1.19656		0.01805	0.185533	0.405359	-0.468579	-0.0335878	0.392583	1.41402	1.26386	-0.368704	-0.598522
0.0181	-0.92506	2.73245	2.22102	-0.23847	2.17388	-2.08433	-1.39355	-0.70079	3.30063		0.0181	-5.59933	-5.06376	-8.01092	4.28962	-3.47509	2.89354	4.33269	-7.6466	-3.81763		0.0181	0.187824	0.41224	-0.46571	-0.0391435	0.394552	1.40427	1.25646	-0.368809	-0.596355
0.01815	-0.91354	2.7404	2.22318	-0.23083	2.14278	-2.07573	-1.40756	-0.72702	3.32899		0.01815	-5.03767	-7.60683	-7.7457	2.23021	-3.31907	2.89354	3.49021	-7.17855	-3.95805		0.01815	0.190187	0.419189	-0.462842	-0.0447679	0.396456	1.39451	1.24914	-0.368793	-0.594108
0.0182	-0.90134	2.74827	2.225	-0.22296	2.11176	-2.06739	-1.42119	-0.75302	3.35726		0.0182	-2.52581	-5.79704	-6.13873	1.41892	-1.83692	3.48641	2.21087	-6.32046	-0.650501		0.0182	0.192624	0.426206	-0.459973	-0.050462	0.398296	1.38473	1.2419	-0.368656	-0.591779
0.01825	-0.88845	2.75607	2.22647	-0.21484	2.08084	-2.05931	-1.43445	-0.77877	3.38542		0.01825	-2.61942	-2.38028	-6.91881	3.63435	-0.666798	2.97155	1.00955	-6.75731	2.29821		0.01825	0.195134	0.433288	-0.457107	-0.0562251	0.400071	1.37495	1.23474	-0.368398	-0.589369
0.0183	-0.8749	2.76378	2.22758	-0.20649	2.05003	-2.05149	-1.44732	-0.80427	3.41347		0.0183	-3.71153	0.989671	-9.19665	3.97759	0.0664785	2.28508	1.96125	-5.7588	0.59763		0.0183	0.197718	0.440435	-0.454246	-0.0620579	0.401781	1.36515	1.22767	-0.368022	-0.586883
0.01835	-0.86068	2.77142	2.22835	-0.1979	2.01933	-2.04393	-1.45981	-0.82952	3.4414		0.01835	-5.22489	2.83066	-10.7412	5.30373	2.64075	3.20558	1.5244	-7.13175	-3.08435		0.01835	0.200373	0.447644	-0.451391	-0.0679601	0.403426	1.35534	1.22069	-0.367526	-0.584319
0.0184	-0.84579	2.77898	2.22875	-0.18906	1.98877	-2.03663	-1.4719	-0.8545	3.4692		0.0184	-4.52282	1.3017	-11.4433	5.50655	6.10431	3.72043	0.900336	-8.6295	-5.25298		0.0184	0.203101	0.454912	-0.448544	-0.073931	0.405007	1.34553	1.21378	-0.366913	-0.581679
0.01845	-0.83025	2.78646	2.2288	-0.17998	1.95834	-2.0296	-1.4836	-0.87922	3.49686		0.01845	-1.93295	0.256394	-10.7568	3.85278	5.82348	2.81554	0.853531	-8.72311	-6.59472		0.01845	0.205902	0.462237	-0.445706	-0.0799696	0.406525	1.33571	1.20697	-0.366183	-0.578964
0.0185	-0.81406	2.79386	2.22849	-0.17065	1.92805	-2.02284	-1.4949	-0.90366	3.52437		0.0185	-2.12017	-2.44269	-7.71449	2.199	2.50033	2.73753	3.66182	-8.17706	-6.09547		0.0185	0.208774	0.469617	-0.442878	-0.0860734	0.407982	1.32589	1.20024	-0.365336	-0.576174
0.01855	-0.79722	2.80118	2.22782	-0.16108	1.89792	-2.01635	-1.50579	-0.92782	3.55174		0.01855	-1.74573	-3.75322	-6.38836	0.997677	-0.791611	3.4396	4.48871	-6.02403	-4.72253		0.01855	0.211717	0.477049	-0.440062	-0.0922421	0.409378	1.31607	1.1936	-0.364377	-0.57331
0.0186	-0.77975	2.80842	2.22679	-0.15126	1.86796	-2.01013	-1.51628	-0.9517	3.57893		0.0186	-1.96415	-2.16186	-7.71449	1.37212	-4.17716	4.65653	4.05186	-4.85391	-3.14676		0.0186	0.214731	0.484533	-0.437259	-0.0984757	0.410717	1.30625	1.18704	-0.363304	-0.570374
0.01865	-0.76164	2.81558	2.2254	-0.14119	1.83816	-2.00419	-1.52635	-0.97528	3.60596		0.01865	-2.60382	-0.305265	-7.87051	3.40033	-4.69202	3.75163	4.73834	-4.10503	-2.47589		0.01865	0.217816	0.492067	-0.43447	-0.104774	0.411999	1.29644	1.18058	-0.36212	-0.567367
0.0187	-0.74291	2.82266	2.22365	-0.13088	1.80855	-1.99852	-1.536	-0.99857	3.63281		0.0187	-3.21228	-0.788915	-4.98421	4.27402	-1.6341	3.61122	4.22348	-4.13624	-1.91423		0.0187	0.220972	0.499648	-0.431694	-0.111136	0.413228	1.28663	1.1742	-0.360827	-0.564291
0.01875	-0.72356	2.82965	2.22153	-0.12031	1.77913	-1.99312	-1.54524	-1.02155	3.65947		0.01875	-3.97676	-0.523687	-3.15882	5.0853	2.12589	3.22118	0.479092	-1.8896	0.332402		0.01875	0.224197	0.507276	-0.428936	-0.117562	0.414404	1.27683	1.16791	-0.359425	-0.561147
0.0188	-0.70361	2.83657	2.21904	-0.1095	1.74991	-1.98801	-1.55406	-1.04422	3.68593		0.0188	-6.08298	-0.118045	-5.53027	5.33493	2.92158	3.04956	-0.78464	0.0762046	1.22169		0.0188	0.227491	0.514948	-0.426194	-0.12405	0.415532	1.26705	1.16171	-0.357918	-0.557935
0.01885	-0.68305	2.8434	2.21619	-0.09844	1.72089	-1.98317	-1.56245	-1.06659	3.71219		0.01885	-7.26871	-0.710907	-7.44927	4.91369	2.56274	2.37869	1.96125	-1.35915	-0.603696		0.01885	0.230855	0.52266	-0.423469	-0.1306	0.416608	1.25728	1.1556	-0.356303	-0.554656
0.0189	-0.6619	2.85015	2.21297	-0.08713	1.69208	-1.9786	-1.57042	-1.08863	3.73824		0.0189	-6.45742	-0.913728	-5.24944	4.0556	4.49734	2.62832	3.69303	-3.55897	-2.17946		0.0189	0.234287	0.530412	-0.420765	-0.13721	0.417637	1.24754	1.14958	-0.354583	-0.551312
0.01895	-0.64016	2.85682	2.20939	-0.07557	1.6635	-1.97432	-1.57795	-1.11036	3.76407		0.01895	-4.88166	0.443614	-3.14322	4.0868	5.33983	2.83114	2.30448	-6.6949	-2.61631		0.01895	0.237788	0.538201	-0.418083	-0.14388	0.41862	1.23781	1.14365	-0.352758	-0.547903
0.019	-0.61784	2.8634	2.20544	-0.06377	1.63515	-1.97032	-1.58505	-1.13175	3.78967		0.019	-4.52282	1.02087	-4.78139	6.87949	5.12141	2.39429	3.88025	-6.44528	-3.17796		0.019	0.241358	0.546026	-0.415422	-0.150608	0.41956	1.2281	1.13781	-0.35083	-0.544427
0.01905	-0.59495	2.8699	2.20112	-0.05172	1.60704	-1.96659	-1.59172	-1.15282	3.81504		0.01905	-6.05178	2.59664	-5.54587	9.31335	4.0605	2.64392	5.28439	-4.96312	-3.5056		0.01905	0.244997	0.553884	-0.412784	-0.157394	0.420459	1.21842	1.13206	-0.348801	-0.540885
0.0191	-0.5715	2.87632	2.19643	-0.03942	1.57917	-1.96315	-1.59796	-1.17355	3.84016		0.0191	-5.59933	2.40942	-4.73458	9.62538	1.84506	3.11197	2.78813	-1.63997	-2.81913		0.0191	0.248706	0.561774	-0.410173	-0.164236	0.421319	1.20877	1.1264	-0.34667	-0.537277
0.01915	-0.54749	2.88265	2.19138	-0.02688	1.55155	-1.95998	-1.60375	-1.19394	3.86503		0.01915	-3.19668	-0.804517	-4.73458	8.47086	2.09469	3.23678	-0.78464	-0.438649	-1.21216		0.01915	0.252481	0.569692	-0.407588	-0.171135	0.42214	1.19915	1.12084	-0.344438	-0.533605
0.0192	-0.52294	2.8889	2.18595	-0.01409	1.52419	-1.95709	-1.60911	-1.21398	3.88965		0.0192	-2.74423	-2.78592	-5.60827	7.33194	3.31162	0.490893	-1.75194	0.60666	-0.0576387		0.0192	0.256324	0.577637	-0.405028	-0.178088	0.422924	1.18956	1.11537	-0.342104	-0.52987
0.01925	-0.49786	2.89506	2.18016	-0.00106	1.4971	-1.95447	-1.61403	-1.23368	3.91399		0.01925	-5.22489	-1.13215	-5.67068	6.53626	1.93867	-1.92736	-0.69103	1.27753	-1.47739		0.01925	0.260232	0.585607	-0.402496	-0.185094	0.423671	1.18	1.11001	-0.33967	-0.526072
0.0193	-0.47225	2.90114	2.174	0.01221	1.47028	-1.95214	-1.61851	-1.25303	3.93807		0.0193	-5.92697	-1.11655	-5.38985	3.27552	-1.46248	2.64392	-0.925055	0.0918062	-2.5695		0.0193	0.264206	0.593599	-0.399988	-0.192152	0.424382	1.17048	1.10473	-0.337137	-0.522212
0.01935	-0.44613	2.90713	2.16748	0.02572	1.44373	-1.95008	-1.62254	-1.27202	3.96186		0.01935	-5.20929	-1.78742	-4.32894	0.919669	-2.81982	6.01387	0.0422461	-1.71798	-3.11556		0.01935	0.268245	0.601613	-0.397509	-0.199262	0.425059	1.16101	1.09956	-0.334505	-0.518291
0.0194	-0.41949	2.91304	2.16058	0.03946	1.41748	-1.94829	-1.62613	-1.29065	3.98536		0.0194	-3.29029	-1.31937	-3.62687	2.51104	-1.04124	3.4708	1.14996	-2.40445	-3.69282		0.0194	0.272349	0.609645	-0.395058	-0.206424	0.425703	1.15157	1.09449	-0.331775	-0.514311
0.01945	-0.39236	2.91886	2.15333	0.05344	1.39151	-1.94678	-1.62928	-1.30893	4.00857		0.01945	-4.11718	-0.944931	-3.75168	7.55036	-0.214351	2.5191	-0.722234	-1.96761	-3.5212		0.01945	0.276516	0.617694	-0.392638	-0.213636	0.426317	1.14218	1.08951	-0.328949	-0.510273
0.0195	-0.36474	2.92459	2.1457	0.06766	1.36584	-1.94553	-1.63198	-1.32683	4.03148		0.0195	-5.3497	-1.06974	-3.53326	9.21974	0.487723	1.91064	-1.95476	-2.57607	-2.70992		0.0195	0.280747	0.625758	-0.390249	-0.2209	0.426901	1.13284	1.08464	-0.326025	-0.50618
0.01955	-0.33665	2.93024	2.13771	0.08211	1.34048	-1.94456	-1.63425	-1.34437	4.05408		0.01955	-3.74274	-1.53779	-3.53326	8.51766	2.07909	0.896535	0.338677	-3.65258	0.145183		0.01955	0.28504	0.633835	-0.387892	-0.228213	0.427459	1.12354	1.07987	-0.323007	-0.502031
0.0196	-0.30809	2.9358	2.12936	0.09678	1.31542	-1.94386	-1.63606	-1.36154	4.07636		0.0196	-2.69743	-1.72501	-4.12612	7.65957	3.07759	1.08375	5.45601	-3.93341	0.644435		0.0196	0.289394	0.641926	-0.385569	-0.235575	0.42799	1.1143	1.0752	-0.319894	-0.49783
0.01965	-0.27907	2.94127	2.12064	0.11168	1.29067	-1.94342	-1.63744	-1.37833	4.09831		0.01965	-2.97826	-0.898126	-4.73458	4.83568	2.35992	2.5191	6.84456	-4.7447	-3.03755		0.01965	0.293808	0.650027	-0.383279	-0.242985	0.428499	1.10511	1.07063	-0.316689	-0.493578
0.0197	-0.2496	2.94666	2.11157	0.12681	1.26625	-1.94325	-1.63837	-1.39475	4.11994		0.0197	-6.70705	1.2237	-4.31334	2.71386	1.65784	3.68923	2.4917	-5.80561	-3.95805		0.0197	0.298281	0.658138	-0.381023	-0.250439	0.428987	1.09598	1.06617	-0.31339	-0.489277
0.01975	-0.2197	2.95196	2.10213	0.14216	1.24215	-1.94333	-1.63886	-1.41079	4.14123		0.01975	-9.42173	-0.430078	-1.36463	3.99319	2.25071	5.42101	-1.06547	-6.6637	-4.4729		0.01975	0.302812	0.666257	-0.378803	-0.257939	0.429456	1.08691	1.06181	-0.310001	-0.484929
0.0198	-0.18937	2.95717	2.09234	0.15772	1.21837	-1.94368	-1.63891	-1.42645	4.16218		0.0198	-8.26721	-0.242858	-1.17741	4.92929	1.57984	5.3898	-3.03127	-6.22685	-4.66012		0.0198	0.307399	0.674383	-0.376619	-0.265482	0.429906	1.07789	1.05755	-0.306521	-0.480535
0.01985	-0.15863	2.96229	2.08219	0.1735	1.19493	-1.94429	-1.63852	-1.44172	4.18277		0.01985	-3.91436	-1.21016	-2.75318	5.84978	1.2054	5.10897	-2.53202	-4.46387	-2.99074		0.01985	0.31204	0.682512	-0.374475	-0.273067	0.430337	1.06894	1.0534	-0.302951	-0.476095
0.0199	-0.12749	2.96732	2.07168	0.18949	1.17183	-1.94515	-1.6377	-1.45661	4.20301		0.0199	0.0484587	-4.22127	-2.25392	4.89808	-0.448375	5.17138	-1.84555	-6.6793	-1.14975		0.0199	0.316735	0.690643	-0.372369	-0.280696	0.430751	1.06005	1.04935	-0.299294	-0.471612
0.01995	-0.09595	2.97226	2.06082	0.20568	1.14907	-1.94626	-1.63643	-1.47112	4.22289		0.01995	1.26539	-5.11057	-0.771769	5.33493	-1.21286	1.56741	-2.84406	-7.30337	-0.868923		0.01995	0.321483	0.698774	-0.370305	-0.288365	0.431146	1.05123	1.0454	-0.29555	-0.467084
0.02	-0.06403	2.97711	2.04961	0.22209	1.12665	-1.94762	-1.63473	-1.48523	4.2424		0.02	-0.638013	-4.87654	-0.834175	4.91369	0.144487	-1.08487	-3.62414	-6.13324	-0.790915		0.02	0.32628	0.706902	-0.368282	-0.296073	0.431525	1.04247	1.04155	-0.291722	-0.462514
0.02005	-0.03175	2.98187	2.03804	0.23869	1.10459	-1.94922	-1.6326	-1.49896	4.26154		0.02005	-3.71153	-7.3728	-0.600151	3.91518	1.40822	0.397283	-6.49484	-6.16445	0.3168		0.02005	0.331125	0.715025	-0.366299	-0.303817	0.431887	1.03378	1.0378	-0.28781	-0.457903
0.0201	0.000899873	2.98654	2.02613	0.25549	1.08287	-1.95107	-1.63004	-1.51229	4.28029		0.0201	-2.90025	-8.57413	-0.834175	3.1195	0.456519	1.87944	-5.87077	-6.58569	0.00476786		0.0201	0.336017	0.723141	-0.364357	-0.311595	0.432232	1.02517	1.03414	-0.283817	-0.453252
0.02015	0.03389	2.99112	2.01388	0.27248	1.06152	-1.95316	-1.62705	-1.52523	4.29866		0.02015	-1.60531	-6.06227	-1.115	5.14771	0.284901	3.28358	-2.3136	-5.16594	0.847256		0.02015	0.340952	0.731247	-0.362454	-0.319406	0.43256	1.01662	1.03058	-0.279747	-0.448563
0.0202	0.06722	2.99561	2.00128	0.28966	1.04052	-1.95548	-1.62363	-1.53778	4.31664		0.0202	-4.22639	-3.5036	-3.78288	7.23833	0.908967	4.76574	0.775523	-3.94902	1.19049		0.0202	0.34593	0.739343	-0.360592	-0.327248	0.432872	1.00816	1.02712	-0.275602	-0.443839
0.02025	0.10087	3	1.98834	0.30702	1.01988	-1.95804	-1.61979	-1.54993	4.33422		0.02025	-5.06888	-2.91074	-2.16031	6.62987	0.2693	5.60823	2.07046	-3.01292	1.03448		0.02025	0.350949	0.747427	-0.358769	-0.33512	0.433166	0.999774	1.02375	-0.271385	-0.439082
0.0203	0.13484	3.00431	1.97507	0.32456	0.99961	-1.96082	-1.61553	-1.56168	4.3514		0.0203	-3.13427	-2.62991	-0.522143	5.11651	-0.666798	5.87345	1.10316	-4.38586	-1.75822		0.0203	0.356005	0.755495	-0.356988	-0.343021	0.433446	0.991472	1.02048	-0.267096	-0.434291
0.02035	0.1691	3.00852	1.96145	0.34228	0.97971	-1.96383	-1.61085	-1.57304	4.36817		0.02035	-1.30888	-3.05115	-0.0384923	5.47534	2.04789	6.20109	0.213864	-5.63399	-2.25747		0.02035	0.361098	0.76355	-0.355247	-0.350952	0.43371	0.983256	1.0173	-0.262738	-0.429471
0.0204	0.20365	3.01263	1.94751	0.36016	0.96018	-1.96705	-1.60576	-1.584	4.38452		0.0204	-1.88614	-2.81713	-0.522143	6.42704	3.20241	5.04657	-2.43841	-5.29076	-2.10145		0.0204	0.366224	0.771587	-0.353549	-0.358908	0.433961	0.97513	1.01422	-0.258312	-0.424622
0.02045	0.23848	3.01666	1.93324	0.37822	0.94102	-1.9705	-1.60026	-1.59457	4.40046		0.02045	-3.3839	-4.4553	-1.45824	6.89509	1.98548	3.98566	-1.48671	-3.43416	-2.02344		0.02045	0.371382	0.779604	-0.351894	-0.36689	0.434198	0.967093	1.01124	-0.253822	-0.419747
0.0205	0.27357	3.02059	1.91864	0.39643	0.92224	-1.97415	-1.59435	-1.60473	4.41598		0.0205	-3.63353	-5.23538	-2.37874	7.878	1.87627	3.00276	-1.23709	-2.35765	-0.338468		0.0205	0.376568	0.787603	-0.350282	-0.374896	0.434422	0.95915	1.00835	-0.24927	-0.414846
0.02055	0.30891	3.02442	1.90371	0.4148	0.90383	-1.97801	-1.58804	-1.6145	4.43107		0.02055	-2.58822	-4.53331	-2.9716	6.81708	4.27892	2.75313	-0.831445	-3.63698	0.394809		0.02055	0.381781	0.795577	-0.348714	-0.382924	0.434633	0.951302	1.00556	-0.244659	-0.409921
0.0206	0.3445	3.02816	1.88847	0.43331	0.88581	-1.98208	-1.58133	-1.62387	4.44572		0.0206	-3.04066	-3.92484	-3.59566	5.38174	7.38364	2.90915	-1.12788	-3.99582	-0.806517		0.0206	0.387018	0.803529	-0.347188	-0.390974	0.434831	0.943551	1.00287	-0.239991	-0.404972
0.02065	0.38031	3.0318	1.87291	0.45198	0.86816	-1.98635	-1.57423	-1.63284	4.45994		0.02065	-3.08747	-2.02144	-2.84679	5.0853	5.85468	2.69072	-2.75045	-3.21574	-2.5851		0.02065	0.392277	0.811454	-0.345704	-0.399046	0.435015	0.935901	1.00027	-0.235268	-0.400003
0.0207	0.41634	3.03535	1.85704	0.47078	0.85089	-1.99081	-1.56673	-1.64141	4.47372		0.0207	-1.96415	-0.991736	-1.91069	5.25692	3.71726	3.4708	-3.53053	-2.59167	-3.78643		0.0207	0.397556	0.819351	-0.344261	-0.407138	0.435184	0.928354	0.997775	-0.230491	-0.395015
0.02075	0.45257	3.03881	1.84086	0.48971	0.83401	-1.99546	-1.55886	-1.64958	4.48705		0.02075	-2.65062	-2.83273	-2.17592	5.78738	2.2351	4.3757	-1.48671	-1.15632	-2.72552		0.02075	0.402852	0.827217	-0.342859	-0.415249	0.435338	0.920916	0.995375	-0.225663	-0.390009
0.0208	0.48899	3.04216	1.82437	0.50877	0.81751	-2.00029	-1.5506	-1.65736	4.49993		0.0208	-2.75983	-4.4553	-2.40994	7.30074	1.75145	4.62532	0.635108	-0.0798117	-1.02494		0.0208	0.408165	0.835051	-0.341497	-0.423379	0.435478	0.913586	0.993073	-0.220782	-0.384989
0.02085	0.52559	3.04542	1.80758	0.52796	0.80139	-2.00531	-1.54196	-1.66474	4.51236		0.02085	-3.57112	-5.28218	-2.50355	5.39734	2.62515	1.78583	1.93004	-0.0174052	0.909662		0.02085	0.413491	0.84285	-0.340173	-0.431525	0.435604	0.906369	0.990871	-0.215852	-0.379958
0.0209	0.56236	3.04858	1.79049	0.54726	0.78566	-2.0105	-1.53296	-1.67172	4.52433		0.0209	-3.3995	-6.17148	-1.31783	2.99469	1.1898	1.16176	3.69303	-1.49956	0.738044		0.0209	0.418831	0.850614	-0.338886	-0.439688	0.435716	0.899267	0.988768	-0.210874	-0.374916
0.02095	0.59928	3.05164	1.77311	0.56667	0.77031	-2.01586	-1.52359	-1.67831	4.53585		0.02095	-3.63353	-8.52732	-1.66106	5.14771	-1.08804	2.4411	5.11278	-3.46537	-0.26046		0.02095	0.424183	0.858342	-0.337633	-0.447866	0.435814	0.892283	0.986768	-0.20585	-0.36987
0.021	0.63634	3.0546	1.75543	0.58618	0.75535	-2.02138	-1.51386	-1.6845	4.54689		0.021	-3.85195	-8.2777	-2.44114	4.96049	-1.52489	1.97305	2.61651	-1.31234	1.01887		0.021	0.429546	0.866032	-0.336414	-0.456057	0.435898	0.885417	0.98487	-0.20078	-0.364819
0.02105	0.67354	3.05746	1.73748	0.60579	0.74077	-2.02707	-1.50378	-1.6903	4.55747		0.02105	-3.75834	-6.32749	-0.771769	5.52215	1.37702	0.865332	0.0734493	0.294627	2.57904		0.02105	0.434918	0.873683	-0.335228	-0.464262	0.435969	0.878671	0.983077	-0.195667	-0.359769
0.0211	0.71085	3.06023	1.71924	0.6255	0.72658	-2.03291	-1.49335	-1.69571	4.56758		0.0211	-3.22788	-3.08235	0.975614	6.19302	2.99958	1.5206	-1.3619	-2.24844	2.78186		0.0211	0.440297	0.881296	-0.334076	-0.472476	0.436025	0.872048	0.98139	-0.190513	-0.35472
0.02115	0.74826	3.06289	1.70072	0.64528	0.71277	-2.03889	-1.48257	-1.70072	4.57721		0.02115	-1.62092	-1.53779	0.803996	4.67966	4.0917	2.25388	-2.89086	-3.66819	1.2997		0.02115	0.445682	0.888867	-0.332957	-0.4807	0.436066	0.86555	0.979809	-0.185318	-0.349675
0.0212	0.78577	3.06545	1.68193	0.66515	0.69935	-2.04503	-1.47146	-1.70534	4.58637		0.0212	-3.4151	-0.274061	0.694784	2.1834	3.96689	0.288072	-3.18729	-1.9052	-0.712907		0.0212	0.451072	0.896396	-0.331871	-0.488931	0.436093	0.859176	0.978335	-0.180084	-0.344636
0.02125	0.82336	3.06791	1.66288	0.68509	0.68631	-2.0513	-1.46002	-1.70958	4.59505		0.02125	-3.3683	0.474817	2.69179	0.248799	2.09469	-0.804042	-2.23559	0.388237	-1.89863		0.02125	0.456465	0.903879	-0.33082	-0.49717	0.436105	0.852926	0.976969	-0.174812	-0.339607
0.0213	0.86102	3.07027	1.64356	0.70509	0.67366	-2.0577	-1.44826	-1.71343	4.60324		0.0213	-1.35569	-0.820118	2.97262	0.311206	0.347308	-1.17848	-1.12788	-0.111015	-4.09846		0.0213	0.461859	0.911315	-0.329801	-0.505413	0.436101	0.846803	0.975712	-0.169503	-0.334587
0.02135	0.89873	3.07252	1.62398	0.72516	0.66139	-2.06424	-1.43618	-1.71689	4.61095		0.02135	-1.71453	-1.08535	-0.740566	1.87137	-0.40157	-0.476408	-1.3151	-1.49956	-7.3436		0.02135	0.467253	0.918703	-0.328816	-0.51366	0.436081	0.840807	0.974564	-0.16416	-0.32958
0.0214	0.93649	3.07467	1.60415	0.74527	0.6495	-2.07089	-1.42379	-1.71997	4.61817		0.0214	-0.591208	-4.56451	-1.39583	2.1678	1.87627	0.0228439	-0.488209	-1.59317	-6.61032		0.0214	0.472645	0.926037	-0.327863	-0.521907	0.436043	0.834939	0.973522	-0.158785	-0.324586
0.02145	0.97428	3.07672	1.58407	0.76543	0.63799	-2.07766	-1.4111	-1.72266	4.62491		0.02145	-0.560005	-6.07787	0.897605	0.997677	2.59394	0.740519	0.494693	-2.48246	-5.19057		0.02145	0.478034	0.933318	-0.326944	-0.530152	0.435987	0.829199	0.972588	-0.153379	-0.319608
0.0215	1.01209	3.07866	1.56375	0.78562	0.62685	-2.08454	-1.39811	-1.72498	4.63115		0.0215	-3.05627	-4.76733	1.8493	-0.531282	1.43942	1.38019	0.323075	-2.95051	-2.80353		0.0215	0.48342	0.940542	-0.326057	-0.538391	0.435912	0.823587	0.971759	-0.147944	-0.314646
0.02155	1.0499	3.0805	1.54319	0.80585	0.6161	-2.09153	-1.38483	-1.72692	4.6369		0.02155	-4.81925	-3.61281	-0.0228907	0.0147747	0.706145	2.89354	-0.144973	-3.62138	-0.806517		0.02155	0.488799	0.947707	-0.325204	-0.546622	0.435818	0.818103	0.971037	-0.142483	-0.309704
0.0216	1.08771	3.08223	1.5224	0.8261	0.60572	-2.09861	-1.37127	-1.72848	4.64215		0.0216	-3.74274	-3.488	-0.194509	0.498425	1.2522	3.3928	0.853531	-3.99582	-0.198053		0.0216	0.494171	0.954811	-0.324384	-0.554842	0.435704	0.812749	0.97042	-0.136995	-0.304783
0.02165	1.12551	3.08385	1.50138	0.84637	0.59571	-2.10579	-1.35744	-1.72967	4.64691		0.02165	-2.04216	-3.92484	1.64648	1.63734	2.62515	2.03545	2.89734	-1.74919	0.3168		0.02165	0.499534	0.961852	-0.323597	-0.563051	0.43557	0.807525	0.969911	-0.131484	-0.299886
0.0217	1.16328	3.08537	1.48014	0.86665	0.58607	-2.11306	-1.34334	-1.73048	4.65116		0.0217	-2.94705	-3.488	3.48748	3.44713	2.90598	0.147657	2.4917	0.294627	0.0983776		0.0217	0.504887	0.968827	-0.322843	-0.571247	0.435419	0.802433	0.969509	-0.12595	-0.295015
0.02175	1.20101	3.08678	1.45868	0.88693	0.57681	-2.12041	-1.32898	-1.73093	4.65492		0.02175	-3.75834	-3.08235	3.50308	5.28813	3.38963	-0.226782	2.07046	1.18392	0.675638		0.02175	0.510231	0.975737	-0.322123	-0.579429	0.435248	0.797472	0.969214	-0.120398	-0.290173
0.0218	1.23868	3.08808	1.43701	0.9072	0.56791	-2.12784	-1.31436	-1.73101	4.65818		0.0218	-3.63353	-1.83422	1.25644	6.13061	3.38963	2.70632	2.69452	2.16682	-0.603696		0.0218	0.515561	0.982578	-0.321437	-0.587593	0.435061	0.792643	0.969025	-0.114829	-0.285359
0.02185	1.27629	3.08928	1.41514	0.92746	0.55937	-2.13533	-1.29951	-1.73072	4.66094		0.02185	-2.58822	-1.00734	1.56848	5.55335	1.53303	3.95445	1.66482	2.30724	-0.666102		0.02185	0.520877	0.989347	-0.320787	-0.59574	0.434858	0.787948	0.968945	-0.109246	-0.280578
0.0219	1.31383	3.09036	1.39307	0.94771	0.5512	-2.14289	-1.28441	-1.73007	4.66319		0.0219	-2.61942	1.05208	2.97262	5.66256	-0.666798	2.37869	1.04075	4.27304	-1.29017		0.0219	0.526177	0.996046	-0.32017	-0.603866	0.43464	0.783385	0.968974	-0.103651	-0.275828
0.02195	1.35129	3.09133	1.37081	0.96792	0.54339	-2.15051	-1.26909	-1.72907	4.66495		0.02195	-1.71453	0.880459	3.7059	3.63435	-2.28937	0.896535	-1.3151	5.06873	0.285597		0.02195	0.531459	1.00267	-0.319588	-0.611969	0.43441	0.778954	0.969112	-0.0980469	-0.271115
0.022	1.38864	3.0922	1.34836	0.9881	0.53593	-2.15819	-1.25355	-1.7277	4.6662		0.022	-0.934444	0.740045	2.27055	-0.453274	0.877763	1.61421	-1.40871	3.57097	1.65854		0.022	0.536723	1.00922	-0.319041	-0.620048	0.434166	0.774655	0.96936	-0.0924345	-0.266438
0.02205	1.42589	3.09295	1.32573	1.00824	0.52883	-2.16591	-1.2378	-1.72599	4.66694		0.02205	-0.965647	-0.960533	2.19254	-2.18505	4.52854	3.18997	-0.78464	1.07471	0.628833		0.02205	0.541967	1.01569	-0.318529	-0.628101	0.43391	0.770486	0.969719	-0.086815	-0.2618
0.0221	1.46301	3.09359	1.30292	1.02833	0.52208	-2.17367	-1.22185	-1.72392	4.66718		0.0221	-2.97826	-3.06675	3.98673	-2.09145	4.23211	3.98566	-2.3448	0.372636	-0.0108338		0.0221	0.547189	1.02209	-0.318051	-0.636122	0.433639	0.766451	0.970188	-0.0811918	-0.2572
0.02215	1.50001	3.09411	1.27995	1.04836	0.51567	-2.18147	-1.2057	-1.72151	4.66692		0.02215	-4.00796	-4.15887	4.28316	-2.18505	3.14	1.30218	-1.28389	-0.0330068	-1.19656		0.02215	0.55239	1.0284	-0.317607	-0.644112	0.433354	0.762547	0.970769	-0.0755659	-0.25264
0.0222	1.53686	3.09453	1.25681	1.06833	0.50961	-2.18929	-1.18936	-1.71875	4.66616		0.0222	-3.74274	-4.65812	4.04913	-0.812112	2.84357	-1.3813	-0.675429	-0.376243	0.738044		0.0222	0.557566	1.03463	-0.317196	-0.652067	0.433053	0.758776	0.971462	-0.0699396	-0.248119
0.02225	1.57356	3.09483	1.23352	1.08822	0.50389	-2.19714	-1.17285	-1.71564	4.66489		0.02225	-3.47751	-4.11206	2.11453	1.76216	2.35992	0.0852504	-0.347795	1.69877	3.81157		0.02225	0.562717	1.04078	-0.316818	-0.659985	0.432737	0.755139	0.972268	-0.0643149	-0.243639
0.0223	1.6101	3.09501	1.21008	1.10803	0.49851	-2.20501	-1.15616	-1.7122	4.66312		0.0223	-2.88465	-1.78742	0.351548	4.39883	0.924568	1.08375	0.323075	5.00632	3.90518		0.0223	0.567842	1.04683	-0.316473	-0.667865	0.432405	0.751637	0.973189	-0.0586938	-0.239201
0.02235	1.64646	3.09508	1.18649	1.12776	0.49346	-2.21289	-1.13932	-1.70843	4.66084		0.02235	-2.27618	-2.38028	-1.20861	5.13211	0.94017	1.62981	-0.316591	6.7537	2.01738		0.02235	0.572939	1.0528	-0.316162	-0.675706	0.432059	0.74827	0.974224	-0.053078	-0.234808
0.0224	1.68264	3.09503	1.16277	1.14739	0.48874	-2.22078	-1.12233	-1.70432	4.65806		0.0224	-3.61792	-3.81563	-2.78438	5.0697	2.01668	2.19147	0.962742	4.58508	1.89256		0.0224	0.578007	1.05867	-0.315882	-0.683505	0.431695	0.745037	0.975373	-0.0474694	-0.230462
0.02245	1.71863	3.09487	1.13892	1.16692	0.48435	-2.22867	-1.10519	-1.69988	4.65479		0.02245	-4.91286	-4.06526	-3.39284	6.06821	2.43793	2.06666	1.39959	2.8689	2.61024		0.02245	0.583043	1.06444	-0.315635	-0.691259	0.431315	0.741941	0.976636	-0.041871	-0.226165
0.0225	1.75441	3.09459	1.11495	1.18634	0.48028	-2.23655	-1.08792	-1.69512	4.65101		0.0225	-3.4151	-1.50659	-2.31633	5.0697	1.54863	1.73902	0.260669	1.35554	1.01887		0.0225	0.588047	1.07012	-0.315419	-0.698968	0.430918	0.738982	0.978011	-0.036285	-0.221918
0.02255	1.78997	3.09419	1.09086	1.20565	0.47653	-2.24442	-1.07052	-1.69003	4.64674		0.02255	-2.4166	0.365605	0.835199	2.41743	1.14299	2.58151	0.245067	1.38674	-0.525688		0.02255	0.593017	1.07569	-0.315235	-0.706628	0.430507	0.73616	0.979501	-0.0307141	-0.217723
0.0226	1.82531	3.09367	1.06666	1.22482	0.4731	-2.25228	-1.05301	-1.68463	4.64196		0.0226	-3.53992	-1.10095	3.62789	1.94938	1.87627	4.84375	1.5556	1.52716	-1.04054		0.0226	0.597955	1.08115	-0.31508	-0.71424	0.430081	0.733477	0.981103	-0.0251607	-0.213581
0.02265	1.86042	3.09303	1.04236	1.24387	0.46997	-2.26012	-1.0354	-1.67891	4.63669		0.02265	-4.27319	-1.67821	4.43918	1.40332	3.54564	6.91876	2.30448	0.70027	0.082776		0.02265	0.602859	1.08652	-0.314955	-0.721801	0.429641	0.730935	0.982817	-0.0196276	-0.209492
0.0227	1.89528	3.09228	1.01796	1.26277	0.46715	-2.26793	-1.01768	-1.67287	4.63093		0.0227	-4.92846	-5.04816	3.81511	-0.500079	2.60954	6.06067	1.16556	-0.781885	1.17489		0.0227	0.607724	1.09177	-0.314857	-0.729311	0.429185	0.728531	0.984642	-0.0141156	-0.205457
0.02275	1.92989	3.0914	0.99347	1.28153	0.46463	-2.2757	-0.99988	-1.66653	4.62468		0.02275	-6.31701	-5.23538	2.33296	-1.40497	1.62664	3.4708	2.05486	-0.875495	1.90817		0.02275	0.612552	1.09692	-0.314784	-0.736769	0.428718	0.726269	0.986578	-0.00862685	-0.201475
0.0228	1.96423	3.0904	0.9689	1.30013	0.46241	-2.28344	-0.982	-1.65989	4.61793		0.0228	-5.17809	-3.08235	0.195532	1.91817	2.71876	1.80143	1.60241	0.279026	1.22169		0.0228	0.617337	1.10196	-0.314735	-0.744173	0.428238	0.724147	0.988624	-0.00316203	-0.197549
0.02285	1.99831	3.08928	0.94426	1.31857	0.46049	-2.29113	-0.96405	-1.65294	4.6107		0.02285	-5.98937	-0.539289	-1.67666	3.05709	4.84058	0.522096	-0.457006	0.856286	1.98617		0.02285	0.622078	1.1069	-0.31471	-0.751523	0.42775	0.722166	0.990777	0.00227583	-0.193678
0.0229	2.0321	3.08804	0.91955	1.33684	0.45885	-2.29878	-0.94603	-1.6457	4.60298		0.0229	-6.64464	-0.367671	0.148727	1.51253	5.12141	0.615706	-1.28389	0.840684	3.06269		0.0229	0.626772	1.11172	-0.314707	-0.758817	0.427253	0.720325	0.993038	0.00768472	-0.189865
0.02295	2.0656	3.08667	0.89478	1.35494	0.45749	-2.30637	-0.92797	-1.63816	4.59477		0.02295	-4.47601	-0.913728	2.52017	1.1849	2.87477	0.350478	-0.69103	0.388237	3.74916		0.02295	0.631418	1.11642	-0.314724	-0.766055	0.426748	0.718626	0.995406	0.0130631	-0.186109
0.023	2.09881	3.08518	0.86995	1.37284	0.45642	-2.3139	-0.90987	-1.63034	4.58609		0.023	-3.49311	-0.773313	1.70889	2.07419	1.2054	1.4894	0.291872	-1.14072	1.81456		0.023	0.636015	1.12102	-0.314761	-0.773236	0.426237	0.717068	0.99788	0.0184104	-0.18241
0.02305	2.13171	3.08357	0.84508	1.39056	0.45561	-2.32137	-0.89173	-1.62222	4.57692		0.02305	-4.10157	-1.06974	2.94142	1.04448	3.32722	5.3586	0.479092	-1.03151	0.348004		0.02305	0.64056	1.12549	-0.314815	-0.780357	0.425721	0.715652	1.00046	0.0237238	-0.178769
0.0231	2.16429	3.08183	0.82017	1.40808	0.45508	-2.32876	-0.87357	-1.61383	4.56728		0.0231	-0.0451511	-2.64551	4.22075	-0.0164285	4.31012	8.58814	1.35278	-0.189023	0.426012		0.0231	0.645054	1.12984	-0.314886	-0.787421	0.425198	0.714377	1.00314	0.0290034	-0.175187
0.02315	2.19655	3.07997	0.79523	1.42539	0.45482	-2.33609	-0.85539	-1.60515	4.55717		0.02315	3.07517	-3.44119	3.19104	-0.281656	2.50033	9.46183	1.5244	0.247823	2.06418		0.02315	0.649494	1.13408	-0.314972	-0.794425	0.424672	0.713246	1.00593	0.0342455	-0.171663
0.0232	2.22848	3.07798	0.77027	1.44249	0.45481	-2.34333	-0.83721	-1.5962	4.54658		0.0232	2.4043	-2.05265	3.42507	-0.172445	2.37552	6.99677	1.14996	0.840684	3.31231		0.0232	0.65388	1.13819	-0.315074	-0.801369	0.424143	0.712258	1.00881	0.0394471	-0.1682
0.02325	2.26008	3.07586	0.74528	1.45937	0.45506	-2.35049	-0.81903	-1.58698	4.53553		0.02325	-1.88614	-0.430078	5.06324	-1.32697	3.60805	4.60972	1.41519	0.341432	3.31231		0.02325	0.658209	1.14218	-0.31519	-0.808253	0.423615	0.711414	1.0118	0.0446058	-0.164798
0.0233	2.29132	3.07361	0.72029	1.47602	0.45556	-2.35756	-0.80087	-1.5775	4.52402		0.0233	-6.08298	0.0379712	5.6249	-1.82622	1.67345	3.26798	1.74282	1.9016	1.72095		0.0233	0.662478	1.14605	-0.31532	-0.815074	0.423087	0.710716	1.01488	0.0497196	-0.16146
0.02335	2.32222	3.07124	0.6953	1.49244	0.4563	-2.36453	-0.78273	-1.56775	4.51204		0.02335	-6.45742	-1.74061	5.6093	-0.531282	-0.729205	3.65802	3.20938	1.83919	-0.83772		0.02335	0.666687	1.14979	-0.315463	-0.821833	0.422566	0.710164	1.01807	0.0547872	-0.158186
0.0234	2.35275	3.06874	0.67031	1.50862	0.45729	-2.37141	-0.76463	-1.55774	4.49961		0.0234	-5.44331	0.209589	2.28615	0.872864	0.2693	2.70632	5.14398	0.357034	0.348004		0.0234	0.670832	1.15341	-0.315617	-0.828527	0.422051	0.70976	1.02135	0.0598075	-0.154978
0.02345	2.38292	3.06611	0.64533	1.52455	0.45851	-2.37818	-0.74656	-1.54747	4.48673		0.02345	-4.74124	1.41091	-0.319322	-1.17095	3.88888	0.662511	3.84904	-0.781885	1.73655		0.02345	0.674911	1.1569	-0.315781	-0.835156	0.421547	0.709504	1.02472	0.0647795	-0.151836
0.0235	2.41271	3.06335	0.62038	1.54023	0.45996	-2.38485	-0.72855	-1.53695	4.47339		0.0235	-3.97676	0.989671	0.960012	-1.29576	5.60506	2.67512	1.66482	0.0918062	0.426012		0.0235	0.678923	1.16026	-0.315954	-0.84172	0.421053	0.709395	1.02819	0.0697013	-0.148761
0.02355	2.44212	3.06046	0.59545	1.55564	0.46163	-2.3914	-0.71059	-1.52619	4.45962		0.02355	-4.32	0.0847761	1.08482	-0.312859	4.76257	6.45072	0.276271	1.27753	0.566426		0.02355	0.682865	1.16349	-0.316132	-0.848219	0.420571	0.709436	1.03174	0.0745712	-0.145751
0.0236	2.47114	3.05744	0.57056	1.57079	0.46353	-2.39784	-0.6927	-1.51518	4.4454		0.0236	-3.72714	-2.19306	-0.428533	-1.17095	3.90448	7.93287	0.479092	-0.0174052	3.67115		0.0236	0.686736	1.1666	-0.316313	-0.854655	0.420103	0.709627	1.03538	0.0793874	-0.142808
0.02365	2.49977	3.05429	0.54571	1.58567	0.46563	-2.40415	-0.6749	-1.50393	4.43074		0.02365	-2.69743	-2.11505	-0.272517	-2.27866	3.79527	4.85935	1.5556	-0.547861	4.62285		0.02365	0.690535	1.16957	-0.316495	-0.861025	0.41965	0.709968	1.03911	0.0841482	-0.139931
0.0237	2.52801	3.05101	0.52091	1.60026	0.46795	-2.41034	-0.65717	-1.49245	4.41565		0.0237	-3.25909	0.755646	-1.83268	-2.77792	5.26182	5.17138	1.46199	-0.750682	2.54783		0.0237	0.694259	1.17241	-0.316677	-0.86733	0.419215	0.710461	1.04293	0.0888517	-0.137121
0.02375	2.55583	3.0476	0.49616	1.61457	0.47048	-2.4164	-0.63955	-1.48074	4.40013		0.02375	-1.02805	2.61224	-3.45525	-3.02754	4.88738	5.88906	0.416685	-1.54636	3.48393		0.02375	0.69791	1.17512	-0.316856	-0.873569	0.418801	0.711107	1.04683	0.0934955	-0.134378
0.0238	2.58325	3.04405	0.47149	1.62859	0.4732	-2.42233	-0.62203	-1.46879	4.38419		0.0238	-2.93145	2.12859	-2.12911	-4.18206	2.37552	6.43511	-0.597421	-0.0174052	5.68376		0.0238	0.701483	1.1777	-0.317032	-0.879741	0.418409	0.711908	1.05081	0.0980781	-0.131701
0.02385	2.61025	3.04037	0.44688	1.64231	0.47611	-2.42812	-0.60462	-1.45663	4.36783		0.02385	-5.16249	1.75415	1.53727	-2.20066	2.2195	7.63644	-2.87526	1.69877	6.9943		0.02385	0.704981	1.18014	-0.317202	-0.885846	0.418043	0.712864	1.05487	0.102597	-0.129091
0.0239	2.63683	3.03655	0.42236	1.65573	0.47921	-2.43377	-0.58734	-1.44424	4.35105		0.0239	-5.3341	0.365605	4.43918	-1.42058	3.06199	6.91876	-3.68654	1.85479	7.9772		0.0239	0.708399	1.18246	-0.317362	-0.891882	0.417701	0.713977	1.05901	0.107052	-0.12655
0.02395	2.66299	3.03261	0.39792	1.66884	0.4825	-2.43928	-0.57018	-1.43164	4.33387		0.02395	-5.53692	2.2534	4.39237	-4.01045	2.50033	5.3274	-1.90796	1.18392	6.44824		0.02395	0.711736	1.18464	-0.317509	-0.897851	0.417389	0.715245	1.06322	0.111439	-0.124079
0.024	2.68872	3.02852	0.37358	1.68163	0.48596	-2.44463	-0.55317	-1.41882	4.31628		0.024	-6.42622	2.54983	2.05213	-5.43019	2.12589	5.12458	0.245067	0.0918062	3.12509		0.024	0.714989	1.18668	-0.31764	-0.90375	0.417104	0.716671	1.06751	0.115758	-0.121678
0.02405	2.71401	3.02431	0.34934	1.6941	0.4896	-2.44984	-0.53631	-1.4058	4.29829		0.02405	-4.41361	-0.0868418	0.55437	-6.36629	3.09319	5.24939	1.14996	0.138611	0.285597		0.02405	0.718156	1.18859	-0.317754	-0.90958	0.41685	0.718254	1.07187	0.120007	-0.119349
0.0241	2.73886	3.01996	0.32521	1.70624	0.49341	-2.45489	-0.5196	-1.39257	4.2799		0.0241	-3.83635	-1.21016	-0.178907	-8.72214	2.73436	3.72043	-2.20439	1.60516	1.79896		0.0241	0.721238	1.19036	-0.317849	-0.915338	0.416628	0.719992	1.0763	0.124188	-0.117091
0.02415	2.76327	3.01547	0.3012	1.71806	0.49737	-2.45978	-0.50306	-1.37915	4.26113		0.02415	-5.69294	-0.866923	-0.600151	-10.3759	0.456519	4.12607	-4.66945	3.13412	5.68376		0.02415	0.724232	1.192	-0.317924	-0.921021	0.416437	0.721886	1.0808	0.128299	-0.114905
0.0242	2.78723	3.01085	0.27731	1.72953	0.50149	-2.46451	-0.48669	-1.36553	4.24197		0.0242	-6.84746	-1.41298	-0.771769	-9.3462	0.0196737	4.3757	-4.54463	3.60217	6.0738		0.0242	0.72714	1.1935	-0.317977	-0.926628	0.416281	0.723936	1.08536	0.132341	-0.112791
0.02425	2.81074	3.00609	0.25356	1.74067	0.50577	-2.46907	-0.4705	-1.35171	4.22243		0.02425	-7.12829	0.771248	-0.0852972	-7.05276	1.03378	3.70483	-2.85966	0.918693	5.65256		0.02425	0.729959	1.19486	-0.318007	-0.932158	0.416159	0.726143	1.09	0.136314	-0.110747
0.0243	2.8338	3.00119	0.22995	1.75145	0.51019	-2.47347	-0.4545	-1.33771	4.20252		0.0243	-4.97527	3.40792	0.523166	-6.27268	1.04938	5.3118	-1.67393	-3.07532	5.15331		0.0243	0.732689	1.19608	-0.31801	-0.93761	0.416076	0.728506	1.09469	0.140217	-0.108774
0.02435	2.8564	2.99616	0.20648	1.76189	0.51475	-2.4777	-0.4387	-1.32352	4.18225		0.02435	-0.544403	3.29871	-0.802972	-5.5238	2.74996	7.262	-1.50232	-3.793	5.65256		0.02435	0.735327	1.19716	-0.317985	-0.942982	0.416029	0.731026	1.09945	0.144048	-0.10687
0.0244	2.87855	2.99099	0.18317	1.77197	0.51945	-2.48175	-0.42311	-1.30915	4.16161		0.0244	1.18738	2.54983	0.382752	-3.87003	3.82647	6.93437	-1.89236	-0.0954133	5.79297		0.0244	0.737875	1.1981	-0.317932	-0.948272	0.416021	0.733704	1.10427	0.147806	-0.105033
0.02445	2.90022	2.98569	0.16002	1.78169	0.52427	-2.48562	-0.40773	-1.29461	4.14062		0.02445	-1.63652	4.00078	2.13013	-4.30688	2.99958	4.90615	-1.93916	1.80799	4.21721		0.02445	0.740332	1.1989	-0.317848	-0.95348	0.416052	0.73654	1.10914	0.15149	-0.103264
0.0245	2.92144	2.98024	0.13704	1.79104	0.52923	-2.48932	-0.39257	-1.27989	4.11927		0.0245	-5.05327	3.2051	3.33146	-3.5424	3.24921	5.62383	-1.81435	1.26193	4.38883		0.0245	0.742698	1.19957	-0.317731	-0.958606	0.416123	0.739533	1.11408	0.155099	-0.101562
0.02455	2.94218	2.97466	0.11424	1.80002	0.5343	-2.49283	-0.37765	-1.265	4.09759		0.02455	-4.89726	0.724443	3.15984	-0.484477	2.93718	5.81105	-2.11078	3.57097	5.63696		0.02455	0.744972	1.20009	-0.31758	-0.963648	0.416233	0.742683	1.11906	0.158633	-0.0999269
0.0246	2.96246	2.96894	0.09162	1.80863	0.53949	-2.49617	-0.36295	-1.24995	4.07556		0.0246	-3.13427	-2.45829	2.83221	0.826059	3.28041	3.93885	-1.68953	8.87552	7.0255		0.0246	0.747156	1.20047	-0.317393	-0.968605	0.416384	0.745989	1.1241	0.162091	-0.0983598
0.02465	2.98227	2.96308	0.06919	1.81687	0.54478	-2.49931	-0.34851	-1.23474	4.0532		0.02465	-3.04066	-0.539289	3.08183	0.560832	4.88738	3.28358	-0.893852	10.1081	7.55596		0.02465	0.749247	1.20072	-0.317167	-0.973477	0.416573	0.749453	1.1292	0.165474	-0.0968607
0.0247	3.0016	2.95709	0.04696	1.82472	0.55018	-2.50227	-0.33431	-1.21937	4.03052		0.0247	-4.97527	2.269	3.00383	-0.266055	3.51444	5.49902	-1.53352	6.62889	5.21571		0.0247	0.751248	1.20082	-0.3169	-0.978262	0.416801	0.753073	1.13434	0.168779	-0.0954312
0.02475	3.02045	2.95095	0.02494	1.83218	0.55569	-2.50503	-0.32037	-1.20385	4.00751		0.02475	-5.80215	2.53423	3.79951	-0.874518	0.331706	6.51312	-3.32771	2.19803	2.45422		0.02475	0.753158	1.20079	-0.316589	-0.982957	0.417067	0.756851	1.13952	0.172004	-0.0940722
0.0248	3.03883	2.94468	0.00313	1.83926	0.56128	-2.5076	-0.3067	-1.18817	3.9842		0.0248	-5.91136	1.87896	3.23785	-1.91983	-0.105139	7.37121	-2.71924	0.481847	0.98767		0.0248	0.754977	1.20063	-0.316232	-0.987565	0.417372	0.760784	1.14476	0.175151	-0.0927845
0.02485	3.05674	2.93826	-0.01846	1.84595	0.56697	-2.50998	-0.2933	-1.17235	3.96057		0.02485	-6.61344	2.12859	4.47038	-2.68431	1.09619	5.60823	-2.81285	1.30873	3.26551		0.02485	0.756709	1.20032	-0.315826	-0.992081	0.417716	0.764871	1.15003	0.178217	-0.0915679
0.0249	3.07416	2.93171	-0.03983	1.85224	0.57274	-2.51216	-0.28018	-1.15639	3.93665		0.0249	-4.97527	1.50452	5.11005	-3.35518	2.1883	7.2776	-3.2809	-0.0330068	4.65405		0.0249	0.758351	1.19988	-0.315369	-0.996507	0.418101	0.769112	1.15534	0.181201	-0.0904232
0.02495	3.09111	2.92502	-0.06096	1.85813	0.57859	-2.51414	-0.26734	-1.14029	3.91243		0.02495	-1.96415	2.62784	6.32697	-2.94953	3.56124	5.77984	-1.01866	-0.610267	2.57904		0.02495	0.759907	1.1993	-0.314858	-1.00084	0.418526	0.773506	1.1607	0.184101	-0.0893502
0.025	3.10758	2.9182	-0.08185	1.86362	0.58451	-2.51593	-0.25479	-1.12405	3.88793		0.025	-0.357184	1.98817	4.26756	-2.21626	2.68755	3.26798	-2.09518	0.497449	-0.338468		0.025	0.761375	1.19858	-0.31429	-1.00509	0.418993	0.778053	1.16608	0.186915	-0.0883489
0.02505	3.12356	2.91123	-0.1025	1.86871	0.5905	-2.51751	-0.24255	-1.10769	3.86314		0.02505	-1.21527	0.381207	2.09893	-2.48149	1.47063	3.4708	-4.76306	1.33994	-0.510086		0.02505	0.762758	1.19772	-0.313664	-1.00924	0.419502	0.782752	1.1715	0.189642	-0.0874193
0.0251	3.13907	2.90412	-0.12289	1.87339	0.59656	-2.51889	-0.2306	-1.09119	3.83808		0.0251	-0.794029	0.0379712	1.45926	-2.34107	0.316105	6.16989	-4.99708	3.25894	0.129581		0.0251	0.764056	1.19673	-0.312977	-1.0133	0.420056	0.787604	1.17695	0.192281	-0.0865611
0.02515	3.1541	2.89688	-0.14302	1.87766	0.60268	-2.52006	-0.21897	-1.07457	3.81275		0.02515	-1.40249	0.911662	0.257939	-0.531282	-0.0271312	7.46482	-5.62115	7.05013	-0.0888419		0.02515	0.765267	1.19559	-0.312227	-1.01726	0.420655	0.792608	1.18242	0.194831	-0.0857747
0.0252	3.16865	2.88949	-0.16288	1.88152	0.60885	-2.52103	-0.20766	-1.05783	3.78716		0.0252	-2.36979	3.40792	-1.48944	-0.546884	1.98548	7.65204	-9.36554	8.75071	0.69124		0.0252	0.766394	1.19432	-0.311412	-1.02114	0.421298	0.797764	1.18793	0.197292	-0.0850606
0.02525	3.18273	2.88197	-0.18247	1.88497	0.61507	-2.5218	-0.19666	-1.04098	3.76132		0.02525	-4.61643	2.42502	-0.194509	-0.827713	3.79527	9.78946	-9.27193	7.09694	3.28111		0.02525	0.767438	1.1929	-0.310532	-1.02491	0.421988	0.803071	1.19345	0.199665	-0.0844193
0.0253	3.19632	2.8743	-0.20178	1.888	0.62134	-2.52236	-0.18599	-1.02401	3.73523		0.0253	-5.89576	1.13009	0.788394	-1.76381	3.82647	11.334	-5.97998	4.74109	4.04559		0.0253	0.768398	1.19135	-0.309584	-1.02859	0.422726	0.808529	1.199	0.201949	-0.0838516
0.02535	3.20944	2.8665	-0.2208	1.89061	0.62764	-2.5227	-0.17566	-1.00693	3.7089		0.02535	-6.56663	1.87896	3.30026	-2.6219	2.54714	11.2248	-4.71625	1.9328	1.53373		0.02535	0.769275	1.18966	-0.308565	-1.03218	0.423511	0.814138	1.20458	0.204143	-0.0833578
0.0254	3.22208	2.85856	-0.23953	1.89281	0.63399	-2.52285	-0.16566	-0.98975	3.68234		0.0254	-4.13278	1.2393	3.61229	-1.6234	1.65784	7.41802	-3.43692	1.37114	-0.229257		0.0254	0.77007	1.18782	-0.307475	-1.03566	0.424346	0.819895	1.21018	0.206249	-0.0829383
0.02545	3.23425	2.85049	-0.25796	1.89458	0.64036	-2.52278	-0.15601	-0.97246	3.65554		0.02545	-3.13427	-0.383273	5.00083	0.888466	3.92008	6.24789	-3.67094	-0.672674	0.753646		0.02545	0.770786	1.18585	-0.306312	-1.03905	0.425229	0.825801	1.2158	0.208266	-0.082593
0.0255	3.24595	2.84227	-0.27608	1.89593	0.64676	-2.5225	-0.1467	-0.95507	3.62853		0.0255	-2.4322	0.318801	6.06174	0.623238	6.11991	6.90316	-6.82247	-2.62288	2.03298		0.0255	0.771424	1.18374	-0.305074	-1.04234	0.42616	0.831853	1.22143	0.210193	-0.0823224
0.02555	3.25718	2.83392	-0.29389	1.89686	0.65319	-2.52201	-0.13775	-0.93759	3.60131		0.02555	-2.69743	2.08178	5.99934	-1.48298	7.9297	7.66764	-7.21251	-2.70089	2.50103		0.02555	0.771983	1.18148	-0.303761	-1.04554	0.427139	0.838051	1.22708	0.212029	-0.0821267
0.0256	3.26793	2.82542	-0.31139	1.89737	0.65963	-2.5213	-0.12915	-0.92001	3.57388		0.0256	-3.53992	2.33141	4.36117	-2.99634	7.24323	8.02648	-5.91758	-1.29674	1.56493		0.0256	0.772464	1.17909	-0.302372	-1.04864	0.428167	0.844394	1.23275	0.213775	-0.0820063
0.02565	3.27822	2.81679	-0.32856	1.89745	0.66609	-2.52039	-0.12091	-0.90235	3.54625		0.02565	-2.69743	1.70735	4.57959	-2.91833	5.35543	8.12009	-5.1687	-1.60877	0.831654		0.02565	0.772868	1.17655	-0.300905	-1.05164	0.429246	0.850881	1.23844	0.21543	-0.0819613
0.0257	3.28805	2.80803	-0.3454	1.89711	0.67255	-2.51927	-0.11304	-0.8846	3.51843		0.0257	-4.67883	0.833654	5.82772	-1.59219	3.77967	6.43511	-3.35891	-2.17043	0.644435		0.0257	0.773195	1.17388	-0.29936	-1.05454	0.430378	0.857512	1.24414	0.216997	-0.0819909
0.02575	3.29741	2.79912	-0.3619	1.89634	0.67902	-2.51793	-0.10554	-0.86677	3.49042		0.02575	-6.81626	2.05058	3.12864	-0.12564	2.1883	4.85935	-1.53352	-2.27964	1.62734		0.02575	0.773449	1.17107	-0.297734	-1.05734	0.431566	0.864284	1.24985	0.218474	-0.0820945
0.0258	3.30632	2.79008	-0.37807	1.89515	0.68549	-2.51638	-0.09841	-0.84886	3.46224		0.0258	-6.36381	1.92577	-0.553346	-0.79651	0.128885	4.64093	-3.63974	-2.8101	3.53074		0.0258	0.773628	1.16811	-0.296027	-1.06004	0.43281	0.871196	1.25557	0.219863	-0.0822706
0.02585	3.31477	2.7809	-0.39388	1.89353	0.69195	-2.51462	-0.09166	-0.83088	3.43388		0.02585	-3.44631	2.51863	-0.381728	-2.34107	0.75295	3.67363	-5.30911	-1.99881	5.1377		0.02585	0.773735	1.16502	-0.294237	-1.06264	0.434113	0.878245	1.2613	0.221163	-0.0825179
0.0259	3.32276	2.77159	-0.40935	1.89149	0.69841	-2.51265	-0.08529	-0.81282	3.40537		0.0259	2.51352	2.31581	0.46076	-2.77792	0.487723	5.76424	-3.49932	-1.06271	6.61986		0.0259	0.773769	1.16179	-0.292362	-1.06514	0.435473	0.88543	1.26704	0.222374	-0.0828365
0.02595	3.3303	2.76214	-0.42446	1.88902	0.70485	-2.51047	-0.0793	-0.79469	3.37669		0.02595	4.05808	2.2066	2.02092	-1.52979	1.70465	7.88606	0.323075	0.263424	4.51364		0.02595	0.773731	1.15841	-0.290402	-1.06754	0.436892	0.89275	1.27278	0.223496	-0.0832259
0.026	3.3374	2.75255	-0.4392	1.88612	0.71127	-2.50808	-0.0737	-0.7765	3.34786		0.026	3.05957	2.93987	3.7527	-0.328461	1.03378	7.04358	2.21087	1.16832	1.90817		0.026	0.773623	1.1549	-0.288355	-1.06983	0.438368	0.900204	1.27852	0.224527	-0.0836853
0.02605	3.34405	2.74283	-0.45358	1.8828	0.71768	-2.50547	-0.06848	-0.75825	3.3189		0.02605	-0.357184	2.37822	3.36266	1.32531	-0.900822	6.55993	1.80523	1.83919	0.176386		0.02605	0.773446	1.15126	-0.286219	-1.07202	0.439902	0.907789	1.28425	0.225467	-0.084213
0.0261	3.35026	2.73297	-0.46758	1.87906	0.72406	-2.50266	-0.06366	-0.73993	3.28979		0.0261	-3.47751	-0.0244353	5.01644	3.1351	0.503324	5.63943	1.93004	3.53977	-0.135647		0.0261	0.773198	1.14747	-0.283993	-1.0741	0.441493	0.915505	1.28998	0.226313	-0.0848071
0.02615	3.35604	2.72298	-0.48121	1.87489	0.73041	-2.49963	-0.05924	-0.72157	3.26056		0.02615	-6.48862	-0.554891	8.38639	5.49095	2.26631	6.07628	2.64772	2.35404	-0.0108338		0.02615	0.772878	1.14356	-0.281677	-1.07608	0.443141	0.923347	1.2957	0.227063	-0.0854649
0.0262	3.36138	2.71286	-0.49445	1.8703	0.73673	-2.4964	-0.05521	-0.70314	3.2312		0.0262	-7.39352	-0.0244353	7.76232	4.97609	1.78266	6.76275	1.89884	0.450644	0.238792		0.0262	0.772487	1.13951	-0.279269	-1.07796	0.444847	0.931314	1.30142	0.227715	-0.0861856
0.02625	3.3663	2.7026	-0.50731	1.86529	0.74301	-2.49296	-0.05158	-0.68467	3.20173		0.02625	-7.53393	0.677638	7.65311	1.60614	0.877763	5.60823	-0.753437	-0.15782	-0.042037		0.02625	0.772025	1.13532	-0.276769	-1.07972	0.446611	0.939402	1.30713	0.228269	-0.0869681
0.0263	3.37079	2.69221	-0.51977	1.85987	0.74925	-2.48931	-0.04835	-0.66615	3.17215		0.0263	-5.55253	2.2222	7.96514	1.26291	1.29901	6.3103	-1.95476	-1.03151	0.426012		0.0263	0.77149	1.13101	-0.274177	-1.08139	0.448432	0.947609	1.31282	0.228723	-0.0878106
0.02635	3.37486	2.68169	-0.53183	1.85402	0.75545	-2.48545	-0.04552	-0.64759	3.14247		0.02635	-2.55701	3.06469	5.5937	1.98058	4.38813	7.80806	-2.61003	-1.07832	-0.120045		0.02635	0.770885	1.12656	-0.271493	-1.08295	0.450312	0.955931	1.3185	0.229078	-0.0887119
0.0264	3.37851	2.67103	-0.5435	1.84776	0.76159	-2.48139	-0.0431	-0.62899	3.1127		0.0264	-2.49461	4.26601	1.86491	2.04299	7.30563	8.43212	-2.298	-1.01591	-0.868923		0.0264	0.770209	1.122	-0.268716	-1.08441	0.452248	0.964367	1.32417	0.229334	-0.0896701
0.02645	3.38175	2.66025	-0.55476	1.84109	0.76769	-2.47712	-0.04109	-0.61035	3.08284		0.02645	-2.04216	4.68726	0.913207	2.12099	8.38215	8.1981	-1.26829	-0.173421	2.56344		0.02645	0.769463	1.1173	-0.265845	-1.08576	0.454242	0.972914	1.32981	0.229494	-0.0906834
0.0265	3.38459	2.64933	-0.5656	1.834	0.77372	-2.47265	-0.03948	-0.59168	3.0529		0.0265	-1.68332	5.26452	2.44217	1.52813	7.86729	7.41802	-2.2824	1.13712	5.26252		0.0265	0.76865	1.11249	-0.262881	-1.087	0.456294	0.981571	1.33543	0.229557	-0.0917495
0.02655	3.38702	2.63828	-0.57604	1.8265	0.7797	-2.46798	-0.03828	-0.57298	3.02288		0.02655	-2.18257	6.9963	2.09893	1.35651	5.24622	5.99827	-5.34032	0.731473	2.87547		0.02655	0.767769	1.10755	-0.259823	-1.08814	0.458404	0.990337	1.34103	0.229523	-0.0928665
0.0266	3.38906	2.62711	-0.58606	1.8186	0.78562	-2.4631	-0.03749	-0.55425	2.9928		0.0266	-3.08747	6.85588	2.13013	2.86987	0.206893	5.67063	-4.38862	0.949896	0.488418		0.0266	0.766822	1.1025	-0.256671	-1.08917	0.460573	0.99921	1.3466	0.22939	-0.094032
0.02665	3.39071	2.6158	-0.59565	1.81029	0.79147	-2.45803	-0.03711	-0.53549	2.96266		0.02665	-3.10307	3.23631	2.00532	4.64846	-1.22846	4.62532	-2.03277	0.466245	-0.83772		0.02665	0.765809	1.09733	-0.253425	-1.0901	0.462799	1.00819	1.35214	0.229158	-0.0952433
0.0267	3.39197	2.60436	-0.60482	1.80159	0.79724	-2.45276	-0.03714	-0.51671	2.93246		0.0267	-3.94556	-2.23987	0.772792	4.0868	0.347308	4.51611	-0.269786	-2.8257	-0.572492		0.0267	0.76473	1.09205	-0.250087	-1.09092	0.465083	1.01727	1.35766	0.228827	-0.0964974
0.02675	3.39285	2.5928	-0.61356	1.79248	0.80295	-2.44728	-0.03758	-0.49791	2.90222		0.02675	-5.17809	-3.01995	0.647979	4.25842	2.35992	4.90615	-0.0669653	-3.99582	1.70535		0.02675	0.763586	1.08665	-0.246656	-1.09163	0.467427	1.02645	1.36315	0.228398	-0.0977919
0.0268	3.39335	2.58111	-0.62187	1.78297	0.80857	-2.44162	-0.03843	-0.4791	2.87193		0.0268	-4.91286	0.521622	1.33445	4.1336	1.08058	4.21968	-1.72074	-2.8413	3.87397		0.0268	0.762377	1.08113	-0.243132	-1.09224	0.469829	1.03574	1.36861	0.22787	-0.0991248
0.02685	3.39349	2.56929	-0.62974	1.77308	0.81412	-2.43576	-0.03969	-0.46027	2.84162		0.02685	-5.56813	3.06469	2.03652	1.82456	0.799755	4.48491	-3.45252	-3.40296	4.57605		0.02685	0.761102	1.07551	-0.239516	-1.09274	0.47229	1.04512	1.37404	0.227244	-0.100495
0.0269	3.39326	2.55735	-0.63717	1.76279	0.81958	-2.4297	-0.04135	-0.44143	2.81127		0.0269	-6.87866	4.25041	1.8337	0.748051	4.04489	5.3898	-2.53202	-3.32495	3.28111		0.0269	0.759763	1.06979	-0.235807	-1.09314	0.474811	1.0546	1.37945	0.226519	-0.1019
0.02695	3.39267	2.54528	-0.64416	1.75212	0.82495	-2.42345	-0.04343	-0.42259	2.78091		0.02695	-6.98788	5.38933	2.36416	3.32232	6.49435	6.45072	-1.25269	-3.27815	2.78186		0.02695	0.758361	1.06396	-0.232005	-1.09342	0.477393	1.06417	1.38482	0.225693	-0.103338
0.027	3.39173	2.53309	-0.65071	1.74107	0.83023	-2.41702	-0.04592	-0.40374	2.75053		0.027	-5.05327	4.43763	0.725987	4.82008	6.21352	4.62532	0.151457	-4.33906	2.2202		0.027	0.756895	1.05804	-0.228109	-1.0936	0.480036	1.07382	1.39016	0.224767	-0.104808
0.02705	3.39044	2.52077	-0.6568	1.72964	0.83542	-2.4104	-0.04882	-0.38489	2.72014		0.02705	-3.99236	2.36261	-0.428533	5.66256	6.13551	3.79844	1.10316	-3.90221	0.379207		0.02705	0.755369	1.05201	-0.224119	-1.09367	0.482737	1.08357	1.39547	0.223741	-0.106308
0.0271	3.38881	2.50833	-0.66245	1.71784	0.84051	-2.40359	-0.05212	-0.36604	2.68975		0.0271	-2.36979	2.2378	-0.39733	6.42704	5.79228	3.92325	-1.3307	-5.29076	-2.5383		0.0271	0.753781	1.04589	-0.220035	-1.09363	0.485499	1.0934	1.40074	0.222614	-0.107835
0.02715	3.38684	2.49577	-0.66765	1.70566	0.8455	-2.39659	-0.05583	-0.34719	2.65937		0.02715	-2.47901	3.47033	-0.428533	8.00281	2.09469	2.72193	-1.67393	-7.03814	-4.4417		0.02715	0.752133	1.03967	-0.215857	-1.09347	0.48832	1.10332	1.40597	0.221388	-0.109387
0.0272	3.38455	2.48308	-0.67239	1.69312	0.85038	-2.38941	-0.05994	-0.32835	2.62899		0.0272	-2.49461	3.43913	-1.55185	7.28513	-2.38298	4.3757	0.0578477	-7.20976	-3.33398		0.0272	0.750425	1.03335	-0.211587	-1.09322	0.491199	1.11332	1.41116	0.220066	-0.110965
0.02725	3.38193	2.47028	-0.67667	1.68022	0.85516	-2.38206	-0.06446	-0.30952	2.59863		0.02725	-2.96266	4.54684	-2.36314	3.21311	-2.92903	7.88606	-0.176177	-7.14735	0.129581		0.02725	0.748658	1.02695	-0.207223	-1.09285	0.494136	1.12339	1.41631	0.218647	-0.112566
0.0273	3.379	2.45735	-0.68049	1.66696	0.85982	-2.37452	-0.06938	-0.29071	2.5683		0.0273	-3.27469	3.06469	-1.70787	-1.09294	-1.6029	6.45072	-2.3292	-6.28926	3.60874		0.0273	0.746835	1.02046	-0.202766	-1.09237	0.497129	1.13354	1.42141	0.217133	-0.11419
0.02735	3.37576	2.4443	-0.68385	1.65335	0.86438	-2.36681	-0.07469	-0.2719	2.53799		0.02735	-3.24349	0.708841	1.05362	-2.52829	0.425316	3.26798	-1.25269	-5.91482	5.55895		0.02735	0.744955	1.01388	-0.198214	-1.09179	0.500176	1.14377	1.42646	0.215526	-0.115836
0.0274	3.37221	2.43114	-0.68675	1.63939	0.86881	-2.35892	-0.0804	-0.25312	2.50772		0.0274	-3.24349	0.786849	4.15835	-1.07734	1.76706	2.76873	1.32158	-4.80711	5.66816		0.0274	0.743022	1.00721	-0.193568	-1.0911	0.503275	1.15407	1.43147	0.213826	-0.117503
0.02745	3.36837	2.41785	-0.68918	1.62509	0.87313	-2.35086	-0.08651	-0.23436	2.47749		0.02745	-4.80365	2.39382	5.34407	1.52813	2.45353	5.67063	2.4917	-5.58719	3.32791		0.02745	0.741034	1.00046	-0.188828	-1.0903	0.506425	1.16445	1.43643	0.212034	-0.119188
0.0275	3.36423	2.40445	-0.69115	1.61046	0.87732	-2.34263	-0.09301	-0.21562	2.4473		0.0275	-5.08448	3.79796	5.71851	2.24581	2.85917	6.91876	2.74133	-6.91333	0.207589		0.0275	0.738993	0.993626	-0.183996	-1.0894	0.509623	1.17489	1.44133	0.210152	-0.120891
0.02755	3.35981	2.39094	-0.69265	1.59549	0.88139	-2.33423	-0.0999	-0.19691	2.41717		0.02755	-3.32149	4.43763	3.95552	2.49543	2.73436	6.07628	1.11876	-5.21275	-4.11406		0.02755	0.736898	0.986711	-0.179071	-1.0884	0.51287	1.18541	1.44618	0.20818	-0.12261
0.0276	3.35511	2.3773	-0.69368	1.58019	0.88533	-2.32567	-0.10718	-0.17823	2.38709		0.0276	-4.61643	4.50004	0.835199	5.16331	0.128885	6.35711	0.697515	-3.65258	-5.4246		0.0276	0.734751	0.979718	-0.174054	-1.08729	0.516166	1.19598	1.45098	0.206119	-0.12434
0.02765	3.35014	2.36355	-0.69424	1.56457	0.88914	-2.31694	-0.11484	-0.15957	2.35708		0.02765	-8.23601	4.54684	0.632378	6.72348	-0.635595	5.3118	1.4932	-5.13474	-5.95505		0.02765	0.732553	0.972646	-0.168944	-1.08607	0.519508	1.20662	1.45572	0.203968	-0.126082
0.0277	3.34491	2.34969	-0.69433	1.54864	0.89281	-2.30805	-0.12288	-0.14096	2.32713		0.0277	-9.1097	3.78236	1.52167	5.63136	0.518926	2.4567	3.24058	-6.22685	-5.03456		0.0277	0.730305	0.965501	-0.163741	-1.08475	0.522896	1.21732	1.46041	0.201727	-0.127834
0.02775	3.33942	2.33571	-0.69395	1.5324	0.89635	-2.299	-0.13129	-0.12238	2.29726		0.02775	-8.82887	3.39232	1.14723	2.99469	-0.0115296	0.896535	4.06747	-6.30486	-4.81614		0.02775	0.728008	0.958279	-0.158446	-1.08333	0.526329	1.22808	1.46504	0.199395	-0.129595
0.0278	3.33368	2.32162	-0.69309	1.51585	0.89975	-2.28979	-0.14009	-0.10384	2.26747		0.0278	-5.36531	4.53124	1.64648	-0.827713	-2.14895	3.12757	2.17967	-4.88511	-4.61331		0.0278	0.725661	0.950987	-0.153058	-1.08181	0.529804	1.23889	1.46961	0.196973	-0.131364
0.02785	3.32769	2.30742	-0.69176	1.49901	0.903	-2.28043	-0.14925	-0.08534	2.23776		0.02785	-3.89875	4.31282	0.429557	0.373612	-3.92754	4.32889	1.39959	-3.60578	-5.06576		0.02785	0.723264	0.943623	-0.147578	-1.08019	0.53332	1.24976	1.47412	0.194459	-0.133141
0.0279	3.32147	2.29311	-0.68996	1.48187	0.90611	-2.27092	-0.15877	-0.06689	2.20814		0.0279	-2.66622	2.97108	0.398353	1.34091	-2.46099	4.03246	1.72722	-3.69939	-5.03456		0.0279	0.720819	0.936192	-0.142004	-1.07847	0.536873	1.26067	1.47858	0.191854	-0.134922
0.02795	3.31501	2.27869	-0.68769	1.46445	0.90907	-2.26125	-0.16867	-0.04849	2.17861		0.02795	-3.83635	2.40942	0.757191	0.997677	0.784153	3.78284	-0.909453	-3.7618	-3.31838		0.02795	0.718324	0.928693	-0.136336	-1.07665	0.540464	1.27163	1.48298	0.189158	-0.136705
0.028	3.30833	2.26415	-0.68495	1.44675	0.91188	-2.25144	-0.17891	-0.03014	2.14918		0.028	-5.53692	4.1412	0.725987	1.63734	1.12739	2.87794	-1.58032	-3.10653	0.238792		0.028	0.715782	0.92113	-0.130576	-1.07474	0.544089	1.28263	1.48732	0.186371	-0.138487
0.02805	3.30144	2.24951	-0.68173	1.42877	0.91453	-2.24148	-0.18952	-0.01184	2.11986		0.02805	-6.34821	5.63896	-0.678159	4.1024	-0.0739361	3.04956	-0.815844	-3.73059	2.48543		0.02805	0.713191	0.913505	-0.124722	-1.07274	0.547748	1.29368	1.4916	0.183492	-0.140269
0.0281	3.29433	2.23476	-0.67804	1.41053	0.91703	-2.23138	-0.20047	0.0064	2.09064		0.0281	-8.36082	4.70286	-2.73757	3.79037	-0.120741	3.424	-0.285388	-3.01292	3.53074		0.0281	0.710556	0.905818	-0.118773	-1.07064	0.55144	1.30476	1.49582	0.180521	-0.142048
0.02815	3.28702	2.2199	-0.67388	1.39203	0.91937	-2.22113	-0.21177	0.02459	2.06154		0.02815	-10.3422	4.92128	-2.09791	2.85427	-0.744806	3.73603	-1.01866	-2.01441	2.189		0.02815	0.707874	0.898073	-0.11273	-1.06846	0.555162	1.31589	1.49998	0.177458	-0.143823
0.0282	3.27951	2.20494	-0.66924	1.37327	0.92155	-2.21075	-0.22341	0.04271	2.03255		0.0282	-11.8088	5.88858	1.8337	3.82157	-1.38447	5.3274	-0.893852	-2.96611	0.285597		0.0282	0.705148	0.890273	-0.106593	-1.06619	0.558915	1.32704	1.50408	0.174303	-0.145596
0.02825	3.27181	2.18986	-0.66414	1.35427	0.92356	-2.20024	-0.23538	0.06077	2.00369		0.02825	-10.9351	4.46883	4.25196	3.1351	1.08058	6.2947	0.915937	-3.93341	-0.400874		0.02825	0.702379	0.882419	-0.100362	-1.06383	0.562697	1.33823	1.50812	0.171054	-0.147364
0.0283	3.26393	2.17469	-0.65857	1.33503	0.92541	-2.18959	-0.24769	0.07876	1.97495		0.0283	-9.23451	2.75265	4.14274	0.670043	-0.245554	5.54582	3.27178	-5.27515	-1.21216		0.0283	0.69957	0.874515	-0.0940359	-1.06139	0.566507	1.34946	1.5121	0.167711	-0.149128
0.02835	3.25586	2.15941	-0.65252	1.31556	0.92708	-2.1788	-0.26032	0.09668	1.94634		0.02835	-8.51684	2.90867	1.53727	0.404815	-2.69501	4.59412	2.28888	-7.03814	-0.697305		0.02835	0.696721	0.866565	-0.0876181	-1.05886	0.570345	1.36071	1.51602	0.164271	-0.150885
0.0284	3.24763	2.14402	-0.64602	1.29586	0.92859	-2.16789	-0.27327	0.11453	1.91786		0.0284	-9.74936	1.69174	1.22524	0.935271	-0.916424	5.63943	-0.316591	-8.03664	-0.0888419		0.0284	0.693837	0.858571	-0.0811092	-1.05624	0.574209	1.37198	1.51988	0.160733	-0.152637
0.02845	3.23924	2.12853	-0.63904	1.27594	0.92992	-2.15686	-0.28654	0.1323	1.88952		0.02845	-10.2954	3.26751	2.13013	0.264401	-1.27526	7.16839	-1.73634	-6.88212	0.644435		0.02845	0.690919	0.850539	-0.0745112	-1.05354	0.578098	1.38328	1.52368	0.157098	-0.154382
0.0285	3.23069	2.11294	-0.63161	1.25581	0.93107	-2.1457	-0.30011	0.15	1.86133		0.0285	-9.32812	4.34402	3.42507	-1.6858	-1.05684	8.65054	-4.38862	-6.46088	-0.120045		0.0285	0.687969	0.842469	-0.0678242	-1.05075	0.582011	1.39459	1.52742	0.153365	-0.156119
0.02855	3.22199	2.09725	-0.62371	1.23547	0.93204	-2.13442	-0.31399	0.16762	1.83328		0.02855	-9.59335	3.68875	4.09594	-1.7014	-0.791611	7.09038	-6.37002	-7.56859	0.706841		0.02855	0.684988	0.834362	-0.0610492	-1.04789	0.585946	1.40592	1.53109	0.149534	-0.157847
0.0286	3.21314	2.08146	-0.61535	1.21494	0.93283	-2.12302	-0.32817	0.18516	1.80538		0.0286	-10.467	2.17539	4.36117	-1.73261	-2.6482	2.58151	-6.19841	-8.83233	1.14369		0.0286	0.681978	0.826224	-0.0541851	-1.04493	0.5899	1.41726	1.5347	0.145608	-0.159566
0.02865	3.20416	2.06557	-0.60653	1.19422	0.93343	-2.1115	-0.34264	0.20261	1.77763		0.02865	-9.06289	-1.53779	2.94142	-2.54389	-4.64521	-0.804042	-5.71475	-8.39548	4.09239		0.02865	0.678939	0.818052	-0.0472337	-1.0419	0.593874	1.42861	1.53826	0.141587	-0.161274
0.0287	3.19504	2.04957	-0.59726	1.17332	0.93385	-2.09987	-0.3574	0.21997	1.75004		0.0287	-7.14389	0.381207	1.97412	-2.07584	-5.78413	0.802925	-5.49633	-6.53889	5.82418		0.0287	0.675875	0.809849	-0.0401958	-1.03879	0.597865	1.43996	1.54174	0.137472	-0.16297
0.02875	3.1858	2.03348	-0.58753	1.15224	0.93408	-2.08813	-0.37244	0.23724	1.7226		0.02875	-5.95817	2.97108	1.67769	-2.48149	-4.89484	4.21968	-3.43692	-4.99432	2.50103		0.02875	0.672788	0.801617	-0.0330719	-1.03559	0.601871	1.45131	1.54517	0.133264	-0.164653
0.0288	3.17645	2.01729	-0.57735	1.13099	0.93411	-2.07628	-0.38775	0.25442	1.69533		0.0288	-5.05327	2.72145	2.69179	-3.19916	-2.50779	6.80955	-3.04688	-5.63399	0.628833		0.0288	0.66968	0.793358	-0.0258629	-1.03232	0.60589	1.46266	1.54854	0.128963	-0.166321
0.02885	3.16698	2.001	-0.56673	1.10959	0.93395	-2.06433	-0.40333	0.27151	1.66823		0.02885	-6.14539	1.73855	4.42357	-1.13975	-2.5546	7.19959	-1.64273	-8.05224	3.1407		0.02885	0.666551	0.785072	-0.0185689	-1.02897	0.609921	1.474	1.55184	0.124571	-0.167972
0.0289	3.1574	1.98462	-0.55566	1.08803	0.9336	-2.05227	-0.41918	0.28849	1.64129		0.0289	-6.33261	0.287597	5.06324	-1.52979	-5.31608	8.12009	-1.86115	-7.91183	3.56194		0.0289	0.663405	0.776763	-0.0111882	-1.02554	0.613963	1.48534	1.55507	0.120091	-0.169607
0.02895	3.14773	1.96814	-0.54415	1.06633	0.93304	-2.04011	-0.43528	0.30538	1.61453		0.02895	-6.73825	-0.196053	3.61229	-1.6546	-5.09766	7.79246	-3.34331	-6.24246	1.93937		0.02895	0.660244	0.76843	-0.00372134	-1.02204	0.618013	1.49666	1.55825	0.115523	-0.171224
0.029	3.13796	1.95156	-0.5322	1.0445	0.93228	-2.02785	-0.45162	0.32216	1.58794		0.029	-8.03319	1.3173	2.723	-0.0476318	-5.20687	5.79545	-3.07808	-6.22685	0.706841		0.029	0.657071	0.760077	0.0038318	-1.01846	0.622071	1.50798	1.56136	0.110873	-0.172824
0.02905	3.12811	1.93489	-0.51981	1.02253	0.93132	-2.01549	-0.46821	0.33884	1.56153		0.02905	-9.82737	5.21771	2.94142	0.0147747	-4.03675	5.40541	-1.43991	-7.00693	0.98767		0.02905	0.653886	0.751704	0.0114703	-1.01481	0.626135	1.51927	1.56441	0.10614	-0.174405
0.0291	3.11817	1.91812	-0.50699	1.00045	0.93015	-2.00304	-0.48504	0.35541	1.5353		0.0291	-9.32812	6.26302	2.7698	-0.141242	-4.08355	5.24939	-2.14198	-7.11615	1.2373		0.0291	0.650694	0.743315	0.0191922	-1.01109	0.630203	1.53055	1.56739	0.101328	-0.17597
0.02915	3.10816	1.90126	-0.49374	0.97825	0.92877	-1.9905	-0.50209	0.37187	1.50925		0.02915	-8.40762	2.61224	4.18955	-1.82622	-4.14596	4.26649	-3.12488	-7.22536	1.58053		0.02915	0.647497	0.73491	0.0269979	-1.0073	0.634275	1.5418	1.57031	0.0964361	-0.177517
0.0292	3.09808	1.8843	-0.48007	0.95595	0.92718	-1.97787	-0.51937	0.38821	1.48338		0.0292	-8.96928	2.12859	4.86042	-4.61891	-2.99144	4.71893	-5.34032	-8.23946	2.12659		0.0292	0.644296	0.726496	0.0348854	-1.00344	0.638347	1.55302	1.57316	0.0914692	-0.179048
0.02925	3.08794	1.86725	-0.46598	0.93355	0.92538	-1.96515	-0.53686	0.40444	1.4577		0.02925	-11.1379	4.90568	5.34407	-2.79352	-2.5702	5.49902	-7.02529	-8.05224	2.40742		0.02925	0.641096	0.718071	0.0428535	-0.999521	0.642417	1.56422	1.57595	0.0864293	-0.180561
0.0293	3.07774	1.85011	-0.45147	0.91106	0.92336	-1.95235	-0.55456	0.42055	1.43221		0.0293	-10.233	8.82169	6.49859	-1.48298	-3.98994	4.73454	-5.2155	-7.27216	2.189		0.0293	0.637897	0.70964	0.0509032	-0.995538	0.646484	1.57539	1.57867	0.081319	-0.182057
0.02935	3.06749	1.83288	-0.43655	0.88849	0.92113	-1.93947	-0.57246	0.43654	1.40691		0.02935	-10.5606	10.3819	5.39087	-1.45178	-4.02115	2.37869	-3.78015	-7.84942	-0.276061		0.02935	0.634703	0.701204	0.0590338	-0.991495	0.650544	1.58653	1.58134	0.0761421	-0.183534
0.0294	3.05719	1.81555	-0.42123	0.86585	0.91867	-1.92651	-0.59055	0.45241	1.38181		0.0294	-10.3422	8.54086	4.37677	-0.12564	-3.63111	1.64541	-3.40571	-8.95714	-0.993736		0.0294	0.631512	0.692768	0.0672455	-0.987392	0.654596	1.59764	1.58394	0.0709011	-0.18499
0.02945	3.04685	1.79813	-0.40549	0.84314	0.91599	-1.91347	-0.60883	0.46815	1.35689		0.02945	-10.2954	3.81357	5.26606	3.07269	-3.20986	1.45819	-3.39011	-8.45789	3.43713		0.02945	0.628329	0.684332	0.0755384	-0.983233	0.658637	1.60871	1.58648	0.0655976	-0.186426
0.0295	3.03647	1.78063	-0.38937	0.82038	0.91309	-1.90036	-0.62729	0.48377	1.33217		0.0295	-9.65575	2.28461	4.6888	5.55335	-2.02414	2.23828	-3.82696	-8.92594	7.24392		0.0295	0.625154	0.675898	0.0839115	-0.97902	0.662667	1.61976	1.58897	0.0602322	-0.187841
0.02955	3.02607	1.76303	-0.37284	0.79757	0.90996	-1.88718	-0.64592	0.49925	1.30765		0.02955	-9.25011	2.47183	4.11154	4.69526	-2.07094	3.84524	-1.23709	-8.89473	7.88359		0.02955	0.621987	0.667471	0.0923646	-0.974757	0.666685	1.63076	1.59139	0.0548078	-0.189235
0.0296	3.01564	1.74534	-0.35593	0.77472	0.9066	-1.87392	-0.66472	0.5146	1.28333		0.0296	-10.389	1.41091	4.28316	2.1522	-2.69501	5.81105	-1.84555	-6.18005	6.21422		0.0296	0.618832	0.659054	0.100897	-0.970446	0.670688	1.64172	1.59376	0.0493245	-0.190608
0.02965	3.00519	1.72756	-0.33864	0.75183	0.903	-1.8606	-0.68367	0.52982	1.25921		0.02965	-10.7323	0.833654	4.22075	1.1693	-3.14746	6.93437	-5.29351	-3.44976	7.78998		0.02965	0.615688	0.650647	0.109507	-0.966091	0.674678	1.65264	1.59608	0.043786	-0.19196
0.0297	2.99472	1.7097	-0.32097	0.72892	0.89918	-1.84721	-0.70277	0.54489	1.23529		0.0297	-9.1565	2.69025	4.18955	1.94938	-4.20837	7.21519	-4.80986	-3.73059	11.3316		0.0297	0.612559	0.642257	0.118194	-0.961691	0.678651	1.66352	1.59833	0.0381924	-0.193292
0.02975	2.98424	1.69174	-0.30292	0.706	0.89512	-1.83377	-0.72201	0.55983	1.21158		0.02975	-9.20331	2.69025	4.08034	2.77626	-4.5516	5.93586	-2.51642	-4.88511	12.252		0.02975	0.609447	0.633882	0.126957	-0.957252	0.682608	1.67435	1.60054	0.0325478	-0.194605
0.0298	2.97376	1.6737	-0.28451	0.68306	0.89082	-1.82026	-0.74139	0.57463	1.18806		0.0298	-7.28431	3.28311	3.95552	2.57344	-2.13335	3.06516	-1.98597	-4.15184	8.63247		0.0298	0.606353	0.625527	0.135795	-0.952778	0.686547	1.68512	1.60269	0.0268529	-0.195899
0.02985	2.96328	1.65557	-0.26574	0.66013	0.88628	-1.80669	-0.7609	0.58928	1.16475		0.02985	-4.85045	5.31132	3.26905	2.99469	-0.666798	2.14467	-1.89236	-3.43416	3.63995		0.02985	0.603282	0.617192	0.144708	-0.94827	0.690467	1.69584	1.60479	0.0211112	-0.197173
0.0299	2.9528	1.63734	-0.24661	0.6372	0.8815	-1.79307	-0.78052	0.60378	1.14165		0.0299	-4.74124	5.32692	4.29876	2.49543	0.596934	3.89205	-1.26829	-3.41856	1.05008		0.0299	0.600232	0.60888	0.153693	-0.943728	0.694366	1.70649	1.60684	0.0153246	-0.198427
0.02995	2.94233	1.61904	-0.22713	0.61429	0.87648	-1.77939	-0.80026	0.61813	1.11875		0.02995	-4.66323	4.20361	6.48299	-1.13975	0.706145	5.10897	-1.92356	-1.18753	1.00327		0.02995	0.597207	0.600591	0.162751	-0.939155	0.698241	1.71709	1.60884	0.00949571	-0.199663
0.03	2.93187	1.60064	-0.20731	0.5914	0.87121	-1.76567	-0.8201	0.63234	1.09606		0.03	-5.61493	3.11149	5.43768	-2.02904	0.768552	4.51611	-3.68654	0.107408	0.394809		0.03	0.594205	0.592327	0.171881	-0.934556	0.702089	1.72763	1.61079	0.00362618	-0.200881
0.03005	2.92143	1.58216	-0.18716	0.56855	0.86569	-1.75189	-0.84003	0.64638	1.07357		0.03005	-7.73675	3.51713	3.83071	-4.61891	0.456519	3.50201	-5.91758	-1.70238	-0.494484		0.03005	0.591229	0.584089	0.181082	-0.929933	0.705907	1.7381	1.61269	-0.00228223	-0.202081
0.0301	2.91101	1.56359	-0.16667	0.54573	0.85993	-1.73807	-0.86006	0.66027	1.05129		0.0301	-8.71966	5.23331	3.51868	-8.94056	-2.19576	3.54881	-6.68206	-3.7774	2.73505		0.0301	0.588277	0.575878	0.190352	-0.925289	0.709695	1.74851	1.61454	-0.00822945	-0.203262
0.03015	2.90062	1.54493	-0.14586	0.52296	0.85391	-1.7242	-0.88016	0.67401	1.02922		0.03015	-6.17659	3.01788	4.6576	-8.4101	-4.69202	3.59562	-5.46513	-6.96013	5.96459		0.03015	0.585351	0.567695	0.19969	-0.920624	0.71345	1.75885	1.61635	-0.0142133	-0.204424
0.0302	2.89025	1.52619	-0.12473	0.50025	0.84764	-1.7103	-0.90034	0.68758	1.00736		0.0302	-5.95817	-0.0244353	4.26756	-6.80314	-6.08056	4.12607	-3.54613	-7.83382	4.79447		0.0302	0.582451	0.559539	0.209096	-0.915946	0.717169	1.76911	1.61811	-0.0202325	-0.205567
0.03025	2.87992	1.50736	-0.10329	0.4776	0.84111	-1.69635	-0.92059	0.70099	0.9857		0.03025	-8.12679	-0.695305	4.31436	-7.30239	-5.97135	6.10748	-4.01418	-7.42818	1.90817		0.03025	0.579577	0.551413	0.218568	-0.911252	0.720851	1.7793	1.61982	-0.0262868	-0.206692
0.0303	2.86962	1.48844	-0.08155	0.45502	0.83433	-1.68237	-0.94089	0.71423	0.96425		0.0303	-8.98488	0.381207	4.6888	-7.25558	-5.5189	5.71744	-2.87526	-6.52328	-0.946932		0.0303	0.576729	0.543318	0.228107	-0.906548	0.724495	1.78942	1.62149	-0.0323741	-0.207798
0.03035	2.85936	1.46943	-0.05951	0.43252	0.82728	-1.66835	-0.96125	0.72731	0.94301		0.03035	-9.37493	0.833654	4.42357	-7.31799	-5.86214	5.23379	-2.3136	-3.74619	-2.5851		0.03035	0.573908	0.535253	0.237708	-0.901833	0.728099	1.79946	1.62312	-0.0384921	-0.208885
0.0304	2.84915	1.45035	-0.03718	0.4101	0.81998	-1.6543	-0.98164	0.74021	0.92197		0.0304	-7.53393	1.64494	3.37826	-6.27268	-4.27077	4.23528	-2.23559	-1.8584	-3.81763		0.0304	0.571114	0.527221	0.247372	-0.897111	0.73166	1.80943	1.6247	-0.0446404	-0.209954
0.03045	2.83899	1.43117	-0.01457	0.38778	0.81241	-1.64021	-1.00207	0.75295	0.90114		0.03045	-7.65875	3.87597	2.70739	-5.74223	-3.03825	3.31479	-0.457006	-1.14072	-5.61182		0.03045	0.568347	0.519224	0.257097	-0.892384	0.735176	1.81931	1.62623	-0.0508172	-0.211003
0.0305	2.82887	1.41191	0.00831	0.36556	0.80458	-1.6261	-1.02253	0.76551	0.88052		0.0305	-11.1223	4.82767	2.67619	-3.04314	-1.02564	3.90765	1.10316	-1.71798	-7.51522		0.0305	0.56561	0.511262	0.266883	-0.887653	0.738645	1.82911	1.62773	-0.0570215	-0.212033
0.03055	2.81881	1.39256	0.03146	0.34345	0.79648	-1.61196	-1.04301	0.77789	0.8601		0.03055	-9.98339	4.35962	1.67769	-0.453274	-1.71211	5.88906	1.82083	-4.05823	-8.90376		0.03055	0.562903	0.503337	0.276727	-0.882922	0.742065	1.83883	1.62917	-0.0632518	-0.213042
0.0306	2.8088	1.37313	0.05488	0.32145	0.78811	-1.5978	-1.0635	0.7901	0.83989		0.0306	-7.2063	4.56244	0.850801	-3.40198	-2.5546	6.41951	1.88324	-6.85092	-8.3421		0.0306	0.560227	0.49545	0.286627	-0.878189	0.745433	1.84845	1.63058	-0.069505	-0.21403
0.03065	2.79886	1.35361	0.07854	0.29958	0.77948	-1.58362	-1.08399	0.80213	0.81988		0.03065	-7.00348	4.79647	1.64648	-8.78454	-4.84803	6.90316	1.07195	-7.89623	-7.48401		0.03065	0.557582	0.487604	0.296581	-0.873458	0.74875	1.85799	1.63194	-0.0757791	-0.214995
0.0307	2.78897	1.334	0.10245	0.27784	0.77057	-1.56942	-1.10448	0.81398	0.80007		0.0307	-6.98788	3.57954	5.12565	-10.3603	-4.70762	6.87196	1.14996	-7.5842	-5.11257		0.0307	0.554969	0.479802	0.306587	-0.86873	0.752015	1.86743	1.63326	-0.0820723	-0.215938
0.03075	2.77915	1.31431	0.12659	0.25624	0.7614	-1.55519	-1.12497	0.82564	0.78047		0.03075	-4.69444	3.12709	7.02905	-9.2994	-2.50779	5.20258	-0.800242	-5.66519	-2.08585		0.03075	0.552389	0.472044	0.316644	-0.864005	0.755226	1.87678	1.63454	-0.088381	-0.216857
0.0308	2.7694	1.29453	0.15096	0.23479	0.75194	-1.54096	-1.14543	0.83712	0.76107		0.0308	-3.97676	2.98668	7.34108	-7.30239	-1.94613	5.17138	-1.87675	-4.60428	0.301199		0.0308	0.549841	0.464333	0.326749	-0.859288	0.758382	1.88603	1.63579	-0.0947029	-0.217753
0.03085	2.75971	1.27467	0.17555	0.21348	0.74222	-1.52671	-1.16586	0.84841	0.74186		0.03085	-5.11568	1.36411	7.84033	-5.55501	-2.13335	3.75163	-1.56472	-4.91632	0.847256		0.03085	0.547325	0.456667	0.336902	-0.85458	0.761484	1.89518	1.637	-0.101036	-0.218627
0.0309	2.7501	1.25472	0.20035	0.19234	0.73221	-1.51245	-1.18627	0.85951	0.72286		0.0309	-5.72414	1.58253	5.00083	-5.32098	-0.776009	2.53471	-0.581819	-5.50918	-0.556891		0.0309	0.54484	0.44905	0.347101	-0.849884	0.764529	1.90424	1.63817	-0.107376	-0.219478
0.03095	2.74056	1.23468	0.22536	0.17137	0.72193	-1.49818	-1.20663	0.87042	0.70405		0.03095	-6.94107	1.76975	1.69329	-3.76082	0.191292	2.00425	0.635108	-7.35017	0.519622		0.03095	0.542388	0.441483	0.357346	-0.845201	0.767517	1.91319	1.63931	-0.113723	-0.220306
0.031	2.73109	1.21456	0.25056	0.15056	0.71137	-1.4839	-1.22695	0.88113	0.68545		0.031	-8.43883	-1.36618	-0.241314	-1.06174	-0.385969	2.22267	0.260669	-6.49208	0.50402		0.031	0.539966	0.433967	0.367635	-0.840536	0.770446	1.92204	1.64043	-0.120074	-0.221112
0.03105	2.72171	1.19435	0.27594	0.12994	0.70053	-1.46962	-1.24721	0.89166	0.66703		0.03105	-11.2159	-4.5021	-0.475338	0.0927829	-1.88373	4.04806	-0.254185	-6.00843	-1.18096		0.03105	0.537578	0.426504	0.377967	-0.835889	0.773314	1.93079	1.64151	-0.126429	-0.221895
0.0311	2.7124	1.17405	0.30151	0.10951	0.68941	-1.45534	-1.26741	0.90199	0.64881		0.0311	-11.9024	-4.15887	2.05213	-0.422071	-2.6482	6.01387	-1.29949	-3.26254	-1.649		0.0311	0.535223	0.419097	0.388342	-0.831261	0.776122	1.93944	1.64256	-0.132785	-0.222656
0.03115	2.70317	1.15367	0.32724	0.08927	0.678	-1.44105	-1.28753	0.91212	0.63078		0.03115	-7.83036	-3.01995	5.28166	-0.250453	-3.41268	9.36822	-1.73634	-1.20313	-0.182452		0.03115	0.532902	0.411748	0.398757	-0.826658	0.778869	1.94799	1.64358	-0.139142	-0.223395
0.0312	2.69403	1.1332	0.35314	0.06923	0.66631	-1.42677	-1.30759	0.92205	0.61294		0.0312	-3.85195	-2.48949	5.68731	-2.6375	-2.91343	12.785	-1.58032	-2.10802	-0.697305		0.0312	0.530615	0.404461	0.409211	-0.822079	0.781555	1.95643	1.64458	-0.145498	-0.224112
0.03125	2.68497	1.11265	0.37918	0.0494	0.65434	-1.41249	-1.32756	0.93178	0.59529		0.03125	-4.80365	-2.84833	3.84631	-3.35518	-1.77451	11.9893	-1.75194	-4.60428	-1.97664		0.03125	0.528364	0.397237	0.419703	-0.817525	0.784179	1.96478	1.64554	-0.15185	-0.224809
0.0313	2.676	1.09201	0.40537	0.02978	0.64208	-1.39822	-1.34743	0.94131	0.57783		0.0313	-7.39352	-3.20717	2.91022	-1.40497	-1.47808	9.39942	-0.488209	-5.61839	0.0671744		0.0313	0.526149	0.390078	0.430231	-0.812999	0.786742	1.97302	1.64648	-0.158197	-0.225487
0.03135	2.66711	1.07128	0.43169	0.01038	0.62954	-1.38395	-1.36721	0.95063	0.56055		0.03135	-10.7635	-2.03705	5.71851	-0.7029	-2.44538	3.50201	0.978344	-5.97723	-1.72701		0.03135	0.523973	0.382986	0.440794	-0.808501	0.789244	1.98116	1.6474	-0.164537	-0.226146
0.0314	2.6583	1.05046	0.45814	-0.00879	0.6167	-1.36969	-1.38689	0.95975	0.54346		0.0314	-12.5265	-1.30377	6.76382	0.217596	-1.47808	2.01985	-0.472608	-6.30486	-4.25448		0.0314	0.521834	0.375964	0.451389	-0.804036	0.79168	1.98919	1.64829	-0.170869	-0.226789
0.03145	2.64959	1.02956	0.4847	-0.02773	0.60358	-1.35545	-1.40646	0.96867	0.52654		0.03145	-11.5904	-2.19306	4.89162	-0.640494	-1.24406	3.4708	-0.862648	-5.32196	-2.69431		0.03145	0.519735	0.369013	0.462016	-0.799604	0.794054	1.99712	1.64916	-0.177191	-0.227414
0.0315	2.64097	1.00856	0.51137	-0.04644	0.59017	-1.34122	-1.4259	0.97737	0.50981		0.0315	-11.0911	-3.12916	2.48897	0.54523	-2.19576	2.90915	0.354279	-5.6964	0.0203695		0.0315	0.517674	0.362135	0.472673	-0.795208	0.796359	2.00495	1.65001	-0.183501	-0.228023
0.03155	2.63243	0.98749	0.53814	-0.06489	0.57647	-1.32701	-1.44523	0.98587	0.49325		0.03155	-9.92098	-3.39439	1.58408	-0.172445	0.191292	2.76873	1.36838	-5.27515	0.660036		0.03155	0.515654	0.355332	0.483357	-0.790851	0.798599	2.01266	1.65084	-0.189797	-0.228616
0.0316	2.62399	0.96632	0.56499	-0.0831	0.56248	-1.31282	-1.46442	0.99416	0.47686		0.0316	-8.09559	-3.70642	3.42507	2.12099	2.84357	3.62682	1.96125	-3.20014	-1.6022		0.0316	0.513673	0.348604	0.494067	-0.786534	0.800769	2.02027	1.65165	-0.196078	-0.229193
0.03165	2.61563	0.94506	0.59192	-0.10106	0.5482	-1.29864	-1.48347	1.00224	0.46065		0.03165	-8.03319	-3.5348	3.78391	3.35352	3.45203	3.64242	-0.581819	-1.99881	-0.681704		0.03165	0.511732	0.341953	0.5048	-0.782261	0.802871	2.02776	1.65244	-0.20234	-0.229756
0.0317	2.60737	0.92372	0.61892	-0.11875	0.53363	-1.28449	-1.50238	1.0101	0.44461		0.0317	-9.1409	-3.42559	3.30026	3.38473	1.06498	5.71744	-2.11078	-3.04412	1.05008		0.0317	0.509834	0.335379	0.515556	-0.778033	0.804903	2.03514	1.65321	-0.208582	-0.230303
0.03175	2.5992	0.90229	0.64598	-0.13618	0.51877	-1.27037	-1.52114	1.01776	0.42874		0.03175	-8.31401	-3.5348	4.37677	4.89808	-2.83542	8.51013	-1.3931	-2.7945	0.98767		0.03175	0.507978	0.328881	0.526329	-0.773855	0.806865	2.04241	1.65397	-0.214801	-0.230837
0.0318	2.59112	0.88077	0.67309	-0.15333	0.50362	-1.25627	-1.53975	1.02519	0.41303		0.0318	-7.81476	-2.30227	2.55138	5.63136	-4.92604	9.35262	-0.316591	-2.10802	-1.18096		0.0318	0.506166	0.322461	0.53712	-0.769728	0.808756	2.04956	1.65472	-0.220996	-0.231359
0.03185	2.58313	0.85916	0.70025	-0.17021	0.48818	-1.2422	-1.55819	1.03242	0.39748		0.03185	-10.311	-1.6158	0.36715	3.96199	-4.44239	7.35561	1.77403	-2.98171	-2.70992		0.03185	0.504398	0.316121	0.547926	-0.765654	0.810576	2.05659	1.65544	-0.227165	-0.23187
0.0319	2.57523	0.83746	0.72743	-0.1868	0.47244	-1.22816	-1.57646	1.03943	0.3821		0.0319	-11.9648	-4.72053	1.61528	2.07419	-4.80123	3.86084	3.4278	-2.93491	-2.41348		0.0319	0.502675	0.30986	0.558745	-0.761636	0.812323	2.06351	1.65615	-0.233308	-0.232371
0.03195	2.56742	0.81567	0.75464	-0.20311	0.45641	-1.21416	-1.59456	1.04622	0.36687		0.03195	-10.0146	-6.4055	3.11304	1.13809	-5.16007	4.90615	2.63212	-1.56197	-1.44618		0.03195	0.500995	0.303678	0.569575	-0.757673	0.813996	2.0703	1.65685	-0.239424	-0.232861
0.032	2.55971	0.7938	0.78185	-0.21913	0.44009	-1.20019	-1.61248	1.0528	0.3518		0.032	-8.53244	-5.50061	4.39237	2.38622	-4.22397	5.18698	1.35278	-1.39035	-2.41348		0.032	0.499357	0.297573	0.580417	-0.753768	0.815596	2.07698	1.65754	-0.245509	-0.233341
0.03205	2.55208	0.77183	0.80907	-0.23485	0.42349	-1.18626	-1.63022	1.05915	0.33688		0.03205	-9.1721	-4.65812	4.53278	3.82157	-1.07244	2.28508	2.22647	-1.29674	-2.77232		0.03205	0.497763	0.291547	0.591267	-0.749921	0.817122	2.08352	1.65821	-0.251564	-0.233811
0.0321	2.54455	0.74978	0.83629	-0.25027	0.40659	-1.17237	-1.64776	1.06529	0.32212		0.0321	-9.32812	-5.03256	1.8181	2.63585	0.75295	1.89504	2.83494	-3.27815	-2.46029		0.0321	0.496212	0.285599	0.602124	-0.746134	0.818575	2.08995	1.65888	-0.257584	-0.234269
0.03215	2.5371	0.72764	0.86348	-0.26538	0.3894	-1.15852	-1.6651	1.07122	0.3075		0.03215	-8.70406	-8.21529	-0.00728908	1.51253	2.00108	2.72193	2.60091	-4.94752	-3.83323		0.03215	0.494704	0.279727	0.612988	-0.742408	0.819952	2.09624	1.65954	-0.263568	-0.234713
0.0322	2.52974	0.7054	0.89065	-0.28019	0.37191	-1.14472	-1.68224	1.07692	0.29302		0.0322	-8.28281	-6.62392	-1.16181	1.76216	3.06199	4.09487	1.75843	-3.74619	-6.23588		0.0322	0.493241	0.273935	0.623853	-0.738744	0.821252	2.1024	1.66019	-0.269513	-0.235144
0.03225	2.52247	0.68308	0.91779	-0.29468	0.35414	-1.13096	-1.69918	1.0824	0.27869		0.03225	-9.42173	-4.42409	-1.52065	2.60465	1.59544	3.97006	0.525897	-0.594665	-5.54941		0.03225	0.491823	0.268221	0.63472	-0.735142	0.822475	2.10844	1.66085	-0.27542	-0.23556
0.0323	2.51529	0.66067	0.94487	-0.30885	0.33609	-1.11725	-1.7159	1.08766	0.2645		0.0323	-10.6543	-4.67372	1.20964	3.86838	-2.27377	4.78134	-0.753437	0.0450013	-1.78942		0.0323	0.490451	0.262586	0.645586	-0.731602	0.82362	2.11434	1.66149	-0.281286	-0.235962
0.03235	2.50819	0.63816	0.97191	-0.3227	0.31774	-1.1036	-1.7324	1.09271	0.25044		0.03235	-9.28132	-4.61131	1.75569	2.54224	-4.19277	5.65503	-1.79875	0.934294	0.940866		0.03235	0.489123	0.257033	0.656448	-0.728126	0.824689	2.1201	1.66214	-0.287112	-0.23635
0.0324	2.50118	0.61557	0.99887	-0.33622	0.29911	-1.08999	-1.74868	1.09753	0.23652		0.0324	-5.61493	-2.23987	2.02092	1.40332	-5.98695	7.41802	-2.298	1.82359	2.51663		0.0324	0.48784	0.25156	0.667306	-0.724717	0.825681	2.12573	1.66277	-0.292896	-0.236725
0.03245	2.49425	0.59289	1.02577	-0.34941	0.28019	-1.07644	-1.76474	1.10214	0.22273		0.03245	-6.20779	-1.05414	1.33445	3.22871	-5.98695	9.1498	0.806726	2.61927	-0.0264354		0.03245	0.486601	0.246169	0.678155	-0.721374	0.826598	2.13122	1.66341	-0.29864	-0.237089
0.0325	2.48741	0.57012	1.05258	-0.36227	0.26098	-1.06296	-1.78056	1.10652	0.20906		0.0325	-10.6699	-0.430078	3.06623	4.75767	-5.61251	8.2449	2.25768	2.57247	-1.92983		0.0325	0.485408	0.240859	0.688997	-0.718102	0.827439	2.13658	1.66404	-0.304341	-0.237444
0.03255	2.48064	0.54726	1.07929	-0.37479	0.24149	-1.04953	-1.79614	1.11068	0.19553		0.03255	-13.0413	-1.17896	5.17245	6.50505	-3.83393	7.58963	-0.628624	2.32284	-2.28867		0.03255	0.48426	0.235631	0.699828	-0.7149	0.828207	2.1418	1.66467	-0.309999	-0.237791
0.0326	2.47396	0.52431	1.1059	-0.38697	0.22172	-1.03616	-1.81148	1.11463	0.18211		0.0326	-11.9492	-2.47389	4.86042	7.23833	-2.08655	5.95146	-2.65684	-0.111015	-2.92834		0.0326	0.483158	0.230485	0.710648	-0.711772	0.828902	2.14688	1.6653	-0.315611	-0.238133
0.03265	2.46735	0.50127	1.1324	-0.39881	0.20167	-1.02286	-1.82657	1.11835	0.16882		0.03265	-10.5294	-1.41298	2.7386	5.16331	-1.6653	4.95296	-2.78165	-1.35915	-4.98775		0.03265	0.482102	0.225423	0.721452	-0.708719	0.829523	2.15182	1.66593	-0.321176	-0.238473
0.0327	2.46082	0.47814	1.15877	-0.41031	0.18134	-1.00962	-1.84142	1.12186	0.15564		0.0327	-10.3422	-1.78742	2.36416	3.96199	-2.18016	4.50051	-1.93916	-0.73508	-3.4744		0.0327	0.481093	0.220444	0.732239	-0.705741	0.830074	2.15662	1.66656	-0.326693	-0.23881
0.03275	2.45437	0.45492	1.18501	-0.42145	0.16073	-0.99646	-1.85601	1.12514	0.14258		0.03275	-7.83036	-0.414476	3.79951	4.94489	-5.4721	3.4084	-0.457006	0.949896	-1.53979		0.03275	0.480131	0.215549	0.743007	-0.702842	0.830554	2.16129	1.66719	-0.33216	-0.239145
0.0328	2.44799	0.43161	1.21111	-0.43224	0.13984	-0.98337	-1.87034	1.12821	0.12963		0.0328	-6.84746	1.3017	3.37826	6.77028	-7.15708	2.31628	-2.25119	4.63188	-1.21216		0.0328	0.479215	0.210738	0.753751	-0.700023	0.830962	2.1658	1.66783	-0.337577	-0.23948
0.03285	2.44168	0.40821	1.23706	-0.44268	0.11868	-0.97035	-1.8844	1.13106	0.11678		0.03285	-9.21891	0.41241	2.42657	3.21311	-6.53301	2.59711	-2.92206	3.39935	-1.25896		0.03285	0.478343	0.206012	0.764469	-0.697284	0.831298	2.17018	1.66847	-0.342943	-0.239814
0.0329	2.43544	0.38472	1.26285	-0.45275	0.09725	-0.95741	-1.89821	1.13369	0.10404		0.0329	-10.8571	-2.27107	3.92432	0.170791	-5.28488	3.18997	-2.67244	-1.74919	-1.08735		0.0329	0.477517	0.201371	0.775157	-0.694627	0.831565	2.17441	1.66912	-0.348255	-0.240147
0.03295	2.42926	0.36115	1.28846	-0.46247	0.07555	-0.94454	-1.91174	1.13611	0.09141		0.03295	-9.21891	-2.61431	4.59519	1.90257	-3.81833	2.4723	-2.51642	-5.85241	0.363605		0.03295	0.476737	0.196813	0.785816	-0.692054	0.831762	2.17849	1.66977	-0.353515	-0.24048
0.033	2.42316	0.33748	1.3139	-0.47183	0.05358	-0.93176	-1.925	1.13831	0.07887		0.033	-8.92248	-1.24136	4.06474	3.30672	-5.23808	0.678112	-2.75045	-5.99283	1.62734		0.033	0.476002	0.192339	0.796442	-0.689565	0.83189	2.18243	1.67042	-0.35872	-0.240812
0.03305	2.41712	0.31373	1.33915	-0.48083	0.03134	-0.91907	-1.93798	1.14029	0.06644		0.03305	-9.1565	-0.539289	1.36565	5.64696	-6.93865	0.350478	-2.95327	-4.08943	1.42452		0.03305	0.475312	0.187948	0.807034	-0.687164	0.831948	2.18622	1.67109	-0.363872	-0.241144
0.0331	2.41114	0.28989	1.36419	-0.48945	0.00884	-0.90646	-1.95068	1.14207	0.05409		0.0331	-7.29991	-1.84983	-0.506541	5.0853	-10.0746	1.95745	-4.1858	-3.51217	0.160784		0.0331	0.474668	0.183639	0.817591	-0.684851	0.831938	2.18986	1.67176	-0.368968	-0.241478
0.03315	2.40522	0.26597	1.38903	-0.49772	-0.01392	-0.89394	-1.96309	1.14362	0.04184		0.03315	-6.34821	-1.84983	0.320345	4.00879	-10.9639	4.25089	-4.68505	-2.42006	-2.03905		0.03315	0.474067	0.179414	0.828109	-0.68263	0.831859	2.19335	1.67245	-0.374007	-0.241811
0.0332	2.39936	0.24195	1.41366	-0.50561	-0.03694	-0.88151	-1.97522	1.14497	0.02968		0.0332	-7.56514	1.16129	2.25495	4.97609	-9.16969	3.78284	-2.73484	-1.9208	-1.86743		0.0332	0.473511	0.175272	0.838586	-0.6805	0.831712	2.19671	1.67314	-0.378987	-0.242146
0.03325	2.39355	0.21785	1.43806	-0.51313	-0.06021	-0.86917	-1.98706	1.14611	0.0176		0.03325	-8.82887	3.25191	2.42657	3.25991	-6.75143	1.78583	-1.72074	-0.235828	-2.67871		0.03325	0.472999	0.171213	0.84902	-0.678465	0.831498	2.19991	1.67385	-0.383908	-0.242481
0.0333	2.38779	0.19367	1.46222	-0.52028	-0.08373	-0.85693	-1.99861	1.14704	0.0056		0.0333	-11.4499	2.14419	1.74009	1.1693	-5.98695	0.210063	-0.87825	0.51305	-4.5041		0.0333	0.472531	0.167238	0.859409	-0.676525	0.831216	2.20297	1.67457	-0.388767	-0.242817
0.03335	2.38209	0.1694	1.48614	-0.52705	-0.10751	-0.84479	-2.00986	1.14775	-0.00631		0.03335	-11.6528	-1.75622	1.58408	1.34091	-9.09168	1.59861	-0.254185	-1.37475	-4.80053		0.03335	0.472108	0.163347	0.869751	-0.674685	0.830866	2.20589	1.6753	-0.393565	-0.243155
0.0334	2.37644	0.14504	1.50981	-0.53346	-0.13153	-0.83275	-2.02081	1.14827	-0.01815		0.0334	-10.311	-2.38028	2.39536	-0.266055	-8.76404	1.83263	-0.254185	-3.07532	-3.67722		0.0334	0.471731	0.159541	0.880042	-0.672943	0.830448	2.20867	1.67605	-0.398299	-0.243494
0.03345	2.37083	0.1206	1.53321	-0.53948	-0.15579	-0.82082	-2.03147	1.14858	-0.02991		0.03345	-10.1862	0.240792	4.54839	-0.312859	-6.00256	0.771722	-1.84555	-5.18154	-1.66461		0.03345	0.471397	0.155818	0.890281	-0.671301	0.82996	2.21131	1.67681	-0.402969	-0.243834
0.0335	2.36526	0.09608	1.55634	-0.54513	-0.18029	-0.80899	-2.04182	1.14868	-0.0416		0.0335	-8.59484	1.75415	8.32398	0.623238	-6.81384	1.11496	0.260669	-7.5998	-1.33697		0.0335	0.471109	0.152181	0.900467	-0.669762	0.829406	2.21381	1.67758	-0.407575	-0.244176
0.03355	2.35974	0.07148	1.5792	-0.55041	-0.20503	-0.79727	-2.05187	1.14858	-0.05322		0.03355	-6.67584	2.36261	11.2571	0.997677	-7.11027	-0.257985	4.30149	-7.75581	-3.25597		0.03355	0.470862	0.14863	0.910597	-0.668325	0.828784	2.21617	1.67837	-0.412115	-0.244519
0.0336	2.35425	0.04679	1.60177	-0.55531	-0.23	-0.78567	-2.06161	1.14829	-0.06477		0.0336	-6.58223	-0.882525	10.555	1.01328	-7.12587	-1.84935	4.70713	-5.47798	-4.12966		0.0336	0.470661	0.145163	0.920669	-0.666994	0.828091	2.21839	1.67918	-0.416589	-0.244865
0.03365	2.3488	0.02202	1.62404	-0.55983	-0.2552	-0.77417	-2.07104	1.14779	-0.07626		0.03365	-8.98488	-2.13066	7.5283	1.04448	-5.76853	-0.819644	2.21087	-4.88511	-4.09846		0.03365	0.470503	0.14178	0.93068	-0.665769	0.827332	2.22048	1.68	-0.420997	-0.245215
0.0337	2.34338	-0.00282	1.646	-0.56397	-0.28062	-0.7628	-2.08016	1.1471	-0.08768		0.0337	-8.96928	0.0535729	1.94291	2.83867	-4.78563	-0.382798	2.14847	-4.91632	-4.00485		0.0337	0.470388	0.138483	0.940627	-0.664651	0.826504	2.22243	1.68084	-0.425339	-0.24557
0.03375	2.338	-0.02775	1.66766	-0.56773	-0.30626	-0.75155	-2.08897	1.14622	-0.09905		0.03375	-6.70705	0.927264	-1.80148	1.76216	-5.14447	1.06815	1.43079	-3.40296	-2.33548		0.03375	0.470318	0.13527	0.950508	-0.663642	0.825605	2.22424	1.6817	-0.429616	-0.245932
0.0338	2.33264	-0.05275	1.68899	-0.57112	-0.33211	-0.74041	-2.09746	1.14514	-0.11036		0.0338	-5.53692	0.490418	0.211134	0.295604	-4.69202	2.06666	0.775523	-2.43566	-2.61631		0.0338	0.470293	0.132143	0.96032	-0.662739	0.824637	2.22592	1.68259	-0.433826	-0.246303
0.03385	2.32731	-0.07784	1.71	-0.57413	-0.35818	-0.72941	-2.10564	1.14388	-0.12161		0.03385	-5.64614	0.287597	3.01943	1.38772	-3.64671	0.912137	1.24357	-2.74769	-5.86144		0.03385	0.470312	0.129101	0.970062	-0.661945	0.823601	2.22747	1.68349	-0.43797	-0.246683
0.0339	2.322	-0.10299	1.73067	-0.57676	-0.38445	-0.71853	-2.11351	1.14242	-0.13282		0.0339	-6.41062	-0.383273	5.07884	2.68265	-3.02264	-0.211181	1.07195	-0.516657	-7.70244		0.0339	0.470377	0.126143	0.979733	-0.661259	0.822496	2.22888	1.68442	-0.442047	-0.247075
0.03395	2.31671	-0.12822	1.75099	-0.57902	-0.41093	-0.70778	-2.12105	1.14078	-0.14397		0.03395	-6.62904	-1.83422	4.86042	1.55934	-4.62961	-0.445205	0.588303	-0.0954133	-8.2953		0.03395	0.470486	0.123272	0.989328	-0.660682	0.821325	2.23017	1.68537	-0.446058	-0.247481
0.034	2.31144	-0.15353	1.77096	-0.5809	-0.4376	-0.69716	-2.12828	1.13896	-0.15507		0.034	-6.55103	-1.36618	1.36565	1.07569	-5.69052	-0.772839	2.56971	0.263424	-6.96916		0.034	0.470642	0.120487	0.998848	-0.660216	0.820086	2.23133	1.68634	-0.450004	-0.247902
0.03405	2.30618	-0.1789	1.79057	-0.5824	-0.46446	-0.68668	-2.13519	1.13696	-0.16613		0.03405	-7.2531	-0.539289	2.17694	1.57494	-4.31758	-0.804042	2.28888	-0.501056	-5.58062		0.03405	0.470843	0.117789	1.00829	-0.659862	0.818784	2.23237	1.68733	-0.453885	-0.24834
0.0341	2.30094	-0.20435	1.80982	-0.58353	-0.49152	-0.67634	-2.14177	1.13479	-0.17715		0.0341	-9.00049	-0.913728	5.53129	-0.89012	-2.50779	0.787324	-0.753437	-1.01591	-4.66012		0.0341	0.471091	0.115177	1.01765	-0.659622	0.817413	2.23328	1.68835	-0.457699	-0.248796
0.03415	2.2957	-0.22987	1.82869	-0.58429	-0.51875	-0.66614	-2.14804	1.13243	-0.18812		0.03415	-9.39053	0.0847761	7.07585	-1.77941	-1.40007	2.40989	-2.15758	-2.99732	-4.14527		0.03415	0.471384	0.112651	1.02693	-0.659496	0.815975	2.23407	1.68939	-0.461449	-0.249272
0.0342	2.29047	-0.25545	1.84717	-0.58467	-0.54616	-0.65609	-2.15398	1.12991	-0.19905		0.0342	-10.4358	-1.38178	7.5283	0.373612	-0.760408	4.06367	-2.3136	-5.61839	-3.94244		0.0342	0.47172	0.110211	1.03613	-0.659484	0.814469	2.23475	1.69046	-0.465134	-0.24977
0.03425	2.28525	-0.2811	1.86527	-0.58469	-0.57374	-0.64618	-2.1596	1.12722	-0.20995		0.03425	-10.6855	-1.22576	3.34706	2.35502	-0.510782	3.97006	-2.45401	-3.96462	-4.69132		0.03425	0.472099	0.107858	1.04524	-0.659586	0.812893	2.2353	1.69156	-0.468755	-0.250293
0.0343	2.28003	-0.30681	1.88297	-0.58433	-0.60149	-0.63642	-2.1649	1.12436	-0.22081		0.0343	-11.0443	-0.320866	0.164329	2.51104	-0.105139	3.93885	-2.03277	-2.43566	-6.00186		0.0343	0.47252	0.10559	1.05427	-0.659803	0.811246	2.23574	1.69269	-0.472309	-0.250842
0.03435	2.2748	-0.33259	1.90027	-0.58361	-0.62939	-0.62682	-2.16988	1.12134	-0.23164		0.03435	-12.3236	0.271996	0.413955	-1.23336	0.394113	4.4225	-1.12788	-2.04562	-6.64153		0.03435	0.472982	0.103409	1.06321	-0.660133	0.809526	2.23607	1.69385	-0.4758	-0.251422
0.0344	2.26957	-0.35843	1.91717	-0.58252	-0.65746	-0.61737	-2.17453	1.11815	-0.24244		0.0344	-13.6654	1.72295	0.195532	-2.99634	0.362909	4.65653	0.36988	-1.48396	-5.01896		0.0344	0.473486	0.101313	1.07206	-0.660579	0.807733	2.23628	1.69504	-0.479227	-0.252034
0.03445	2.26434	-0.38433	1.93364	-0.58106	-0.68567	-0.60807	-2.17886	1.11482	-0.2532		0.03445	-10.0926	-0.461281	-0.428533	-0.734103	0.253698	4.96856	0.0266445	-1.93641	-3.5524		0.03445	0.474031	0.0993005	1.08081	-0.661141	0.805864	2.23639	1.69626	-0.482591	-0.25268
0.0345	2.25909	-0.41028	1.94969	-0.57925	-0.71402	-0.59894	-2.18287	1.11132	-0.26394		0.0345	-4.81925	-3.30078	-0.39733	0.810458	-0.105139	4.25089	-0.847047	-0.173421	-2.85033		0.0345	0.474618	0.0973707	1.08947	-0.661818	0.803921	2.23639	1.69752	-0.485894	-0.253362
0.03455	2.25384	-0.43629	1.96532	-0.57707	-0.7425	-0.58997	-2.18655	1.10768	-0.27465		0.03455	-4.67883	-2.61431	1.63088	1.71535	-2.91343	2.08226	-0.987461	1.37114	-0.712907		0.03455	0.475247	0.0955231	1.09803	-0.662613	0.801901	2.23628	1.69881	-0.489137	-0.254079
0.0346	2.24856	-0.46235	1.98051	-0.57454	-0.77112	-0.58117	-2.18991	1.10389	-0.28534		0.0346	-7.59634	-1.81862	1.63088	2.05859	-4.75442	0.45969	-1.76754	1.57396	-1.18096		0.0346	0.475917	0.0937562	1.10649	-0.663525	0.799803	2.23608	1.70014	-0.492321	-0.254834
0.03465	2.24327	-0.48847	1.99526	-0.57165	-0.79986	-0.57254	-2.19295	1.09996	-0.296		0.03465	-7.44032	-1.05414	2.37976	1.96498	-5.08206	-0.133172	-2.3136	1.62077	-3.5056		0.03465	0.476629	0.0920689	1.11484	-0.664553	0.797626	2.23577	1.7015	-0.495446	-0.25563
0.0347	2.23797	-0.51463	2.00956	-0.5684	-0.82872	-0.56408	-2.19567	1.09589	-0.30664		0.0347	-7.53393	-2.45829	3.83071	2.199	-7.03226	0.94334	0.338677	-0.750682	-4.69132		0.0347	0.477383	0.0904598	1.1231	-0.665699	0.795369	2.23537	1.7029	-0.498509	-0.256466
0.03475	2.23263	-0.54084	2.02342	-0.56481	-0.85768	-0.55579	-2.19807	1.09168	-0.31726		0.03475	-11.9648	-4.06526	3.86191	3.1195	-8.3272	0.724917	3.22498	-2.46686	-4.39489		0.03475	0.478177	0.0889271	1.13125	-0.66696	0.793029	2.23488	1.70435	-0.501514	-0.257346
0.0348	2.22728	-0.56709	2.03681	-0.56087	-0.88675	-0.54768	-2.20015	1.08734	-0.32786		0.0348	-12.4172	-6.49911	3.95552	3.91518	-6.4082	2.06666	3.66182	-2.68528	-2.78792		0.0348	0.479011	0.0874687	1.13929	-0.668337	0.790609	2.23429	1.70583	-0.504458	-0.258271
0.03485	2.22189	-0.59338	2.04975	-0.55658	-0.91592	-0.53975	-2.2019	1.08288	-0.33844		0.03485	-10.155	-8.37131	3.53428	2.76066	-4.4736	2.42549	2.02365	-2.34205	-1.52419		0.03485	0.479886	0.0860837	1.14722	-0.66983	0.788111	2.23362	1.70736	-0.507343	-0.259244
0.0349	2.21648	-0.61972	2.06221	-0.55195	-0.94518	-0.532	-2.20334	1.07828	-0.349		0.0349	-7.45592	-6.98276	3.22225	-0.640494	-1.33767	3.4084	-0.0045588	-0.875495	-2.14826		0.0349	0.480799	0.0847704	1.15505	-0.671439	0.785532	2.23285	1.70893	-0.510169	-0.260265
0.03495	2.21103	-0.64609	2.07421	-0.54698	-0.97451	-0.52444	-2.20447	1.07357	-0.35954		0.03495	-8.57924	-4.39289	3.90872	-0.359664	2.26631	5.29619	0.0734493	-1.28114	-2.97514		0.03495	0.481752	0.0835273	1.16276	-0.673164	0.782877	2.23201	1.71054	-0.512935	-0.261338
0.035	2.20555	-0.67249	2.08573	-0.54168	-1.00392	-0.51707	-2.20528	1.06874	-0.37008		0.035	-8.90688	-2.48949	3.62789	1.90257	3.07759	6.37271	1.63361	-2.74769	-3.00635		0.035	0.482745	0.0823533	1.17036	-0.675005	0.780142	2.23108	1.71221	-0.51564	-0.262464
0.03505	2.20003	-0.69893	2.09676	-0.53604	-1.0334	-0.50988	-2.20577	1.0638	-0.38059		0.03505	-5.13128	-1.86543	2.62939	2.74506	1.2678	5.28059	2.27328	-2.54487	-2.67871		0.03505	0.483779	0.0812465	1.17785	-0.676962	0.777328	2.23006	1.71391	-0.518285	-0.263643
0.0351	2.19447	-0.72539	2.10732	-0.53008	-1.06294	-0.50289	-2.20595	1.05874	-0.39109		0.0351	-3.64913	0.41241	3.09744	0.420417	0.0196737	6.68474	1.44639	-1.35915	-4.98775		0.0351	0.484852	0.080205	1.18522	-0.679035	0.774434	2.22897	1.71567	-0.52087	-0.264877
0.03515	2.18886	-0.75188	2.11738	-0.52378	-1.09253	-0.4961	-2.20582	1.05359	-0.40158		0.03515	-3.30589	2.2378	4.03353	-1.639	-0.432774	5.76424	2.35129	-1.93641	-6.4387		0.03515	0.485966	0.0792268	1.19247	-0.681222	0.771461	2.22779	1.71747	-0.523395	-0.266166
0.0352	2.18322	-0.7784	2.12694	-0.51717	-1.12217	-0.4895	-2.20538	1.04833	-0.41206		0.0352	-4.56962	0.318801	5.46888	-1.48298	-2.24256	2.5035	2.86614	-1.57757	-9.73065		0.0352	0.487122	0.0783087	1.1996	-0.683523	0.768408	2.22654	1.71932	-0.525861	-0.267508
0.03525	2.17752	-0.80493	2.13602	-0.51024	-1.15184	-0.48311	-2.20463	1.04298	-0.42252		0.03525	-5.49012	-3.12916	3.76831	-0.0632334	-2.88223	3.51761	3.22498	0.0137981	-10.4171		0.03525	0.488319	0.0774481	1.20661	-0.685936	0.765274	2.22521	1.72121	-0.528271	-0.268906
0.0353	2.17178	-0.83148	2.14459	-0.50299	-1.18154	-0.47692	-2.20358	1.03753	-0.43297		0.0353	-7.12829	-4.36169	1.45926	2.47983	-2.42978	4.3757	2.32008	1.9796	-7.96766		0.0353	0.489558	0.0766404	1.2135	-0.688461	0.762062	2.22381	1.72316	-0.530624	-0.270359
0.03535	2.16599	-0.85804	2.15265	-0.49544	-1.21126	-0.47094	-2.20221	1.032	-0.44341		0.03535	-8.1424	-4.70492	2.47337	2.80747	-1.97733	3.68923	2.77253	1.66757	-6.4231		0.03535	0.490839	0.0758827	1.22026	-0.691096	0.758772	2.22234	1.72515	-0.532922	-0.271869
0.0354	2.16014	-0.88462	2.16021	-0.48758	-1.241	-0.46516	-2.20055	1.02638	-0.45384		0.0354	-8.2048	-4.84534	2.94142	2.79186	-1.6341	2.23828	4.86315	0.497449	-5.48701		0.0354	0.492163	0.0751716	1.2269	-0.693842	0.755405	2.2208	1.72719	-0.535168	-0.273437
0.03545	2.15424	-0.91119	2.16725	-0.47941	-1.27074	-0.4596	-2.19859	1.02069	-0.46426		0.03545	-8.34522	-4.56451	1.35005	2.1522	-0.854018	2.89354	4.20788	-0.142218	-4.25448		0.03545	0.493532	0.0745033	1.23341	-0.696698	0.751962	2.21919	1.72929	-0.537363	-0.275065
0.0355	2.14827	-0.93778	2.17379	-0.47095	-1.30047	-0.45425	-2.19633	1.01492	-0.47467		0.0355	-9.20331	-1.88103	1.53727	0.607637	0.534527	3.00276	2.60091	-0.454251	-3.17796		0.0355	0.494946	0.0738757	1.23979	-0.699662	0.748446	2.21752	1.73143	-0.539508	-0.276753
0.03555	2.14225	-0.96436	2.17981	-0.4622	-1.3302	-0.44912	-2.19377	1.00908	-0.48507		0.03555	-8.93808	-0.289663	3.76831	1.99618	2.51593	4.3445	1.36838	-0.64147	-3.16236		0.03555	0.496407	0.0732847	1.24604	-0.702735	0.744857	2.21579	1.73362	-0.541604	-0.278505
0.0356	2.13617	-0.99094	2.1853	-0.45315	-1.3599	-0.4442	-2.19092	1.00318	-0.49546		0.0356	-8.34522	0.552825	6.51419	3.69676	4.23211	4.4225	0.260669	-0.438649	-5.25298		0.0356	0.497915	0.072728	1.25216	-0.705914	0.741196	2.214	1.73586	-0.543651	-0.280321
0.03565	2.13003	-1.01751	2.19028	-0.44383	-1.38958	-0.43951	-2.18777	0.99722	-0.50584		0.03565	-6.73825	0.584028	7.5439	4.80447	1.48623	4.84375	-1.14348	-0.969105	-6.00186		0.03565	0.499472	0.0722024	1.25814	-0.709199	0.737467	2.21216	1.73814	-0.545649	-0.282203
0.0357	2.12381	-1.04408	2.19474	-0.43422	-1.41921	-0.43504	-2.18434	0.9912	-0.5162		0.0357	-5.13128	-0.866923	7.04465	6.20862	-0.916424	4.20408	-1.00306	-0.501056	-4.05166		0.0357	0.501078	0.0717059	1.26398	-0.712589	0.733672	2.21026	1.74048	-0.547601	-0.284152
0.03575	2.11754	-1.07062	2.19867	-0.42434	-1.44881	-0.4308	-2.18062	0.98513	-0.52656		0.03575	-5.3497	-0.991736	4.01793	6.31783	0.534527	3.50201	0.260669	-0.844292	-2.80353		0.03575	0.502734	0.0712363	1.26969	-0.716081	0.729813	2.20831	1.74288	-0.549506	-0.286169
0.0358	2.11119	-1.09715	2.20207	-0.41418	-1.47834	-0.42678	-2.17662	0.97901	-0.5369		0.0358	-4.07037	-0.476883	4.36117	6.53626	0.706145	3.36159	2.28888	-0.672674	-1.89863		0.0358	0.50444	0.0707904	1.27525	-0.719677	0.72589	2.20631	1.74532	-0.551367	-0.288256
0.03585	2.10477	-1.12366	2.20495	-0.40377	-1.50782	-0.423	-2.17233	0.97286	-0.54724		0.03585	-2.24498	-0.570492	2.30175	5.94339	0.581332	1.86384	-0.0201604	1.0123	-1.86743		0.03585	0.506198	0.0703676	1.28067	-0.723373	0.721905	2.20427	1.74781	-0.553185	-0.290413
0.0359	2.09828	-1.15014	2.2073	-0.39309	-1.53722	-0.41944	-2.16777	0.96666	-0.55756		0.0359	-3.27469	-2.81713	0.491963	5.10091	-0.0115296	1.34898	-0.87825	1.24633	0.363605		0.0359	0.508006	0.0699647	1.28595	-0.72717	0.717856	2.20218	1.75036	-0.554961	-0.292642
0.03595	2.09172	-1.17658	2.20912	-0.38216	-1.56654	-0.41613	-2.16293	0.96044	-0.56786		0.03595	-4.94406	-3.73762	1.98972	3.36912	-0.932026	2.69072	2.05486	1.19952	3.49953		0.03595	0.509863	0.0695798	1.29108	-0.731069	0.713746	2.20005	1.75296	-0.556695	-0.294942
0.036	2.08508	-1.203	2.21041	-0.37098	-1.59577	-0.41304	-2.15782	0.95419	-0.57816		0.036	-6.80066	-3.28518	1.61528	2.46423	-1.11925	3.20558	2.52291	1.23073	4.24841		0.036	0.51177	0.0692108	1.29607	-0.735067	0.709578	2.19788	1.75561	-0.558386	-0.297314
0.03605	2.07836	-1.22937	2.21116	-0.35956	-1.6249	-0.4102	-2.15243	0.94791	-0.58843		0.03605	-6.81626	-1.00734	-0.646956	2.91668	-1.80572	3.33039	1.77403	0.528652	3.65555		0.03605	0.513728	0.0688562	1.3009	-0.739161	0.705353	2.19568	1.75831	-0.560033	-0.299756
0.0361	2.07157	-1.25571	2.21139	-0.34789	-1.65392	-0.4076	-2.14679	0.94162	-0.5987		0.0361	-5.08448	-0.882525	-1.47384	3.54074	-1.40007	1.87944	-1.76754	0.622262	2.17339		0.0361	0.515737	0.068515	1.30559	-0.743352	0.701074	2.19344	1.76107	-0.561639	-0.302269
0.03615	2.06469	-1.28199	2.21108	-0.336	-1.68282	-0.40524	-2.14087	0.93532	-0.60894		0.03615	-4.89726	-1.83422	-0.771769	3.68116	0.425316	1.11496	-3.43692	0.684668	0.753646		0.03615	0.517797	0.0681858	1.31012	-0.747638	0.696743	2.19117	1.76387	-0.563201	-0.304855
0.0362	2.05774	-1.30823	2.21025	-0.32387	-1.7116	-0.40313	-2.1347	0.929	-0.61917		0.0362	-3.3995	-0.539289	0.850801	4.16481	2.81237	1.23977	0.65071	0.840684	-0.151248		0.0362	0.519909	0.0678673	1.3145	-0.752019	0.692359	2.18887	1.76671	-0.564717	-0.307513
0.03625	2.0507	-1.3344	2.20888	-0.31153	-1.74025	-0.40126	-2.12827	0.92269	-0.62938		0.03625	-2.88465	2.39382	2.37976	2.91668	5.33983	3.26798	4.95676	0.403839	-1.50859		0.03625	0.522072	0.0675569	1.31872	-0.756493	0.687925	2.18655	1.76961	-0.566191	-0.310246
0.0363	2.04358	-1.36052	2.20698	-0.29897	-1.76874	-0.39964	-2.12159	0.91638	-0.63957		0.0363	-1.80814	2.09739	2.7698	3.02589	3.79527	3.78284	7.43742	0.294627	-3.33398		0.0363	0.524284	0.067254	1.32279	-0.761061	0.683442	2.1842	1.77255	-0.567623	-0.313052
0.03635	2.03637	-1.38657	2.20455	-0.28619	-1.79709	-0.39827	-2.11466	0.91008	-0.64974		0.03635	-3.27469	2.01938	2.19254	1.68415	-2.11775	2.75313	4.95676	-0.9223	-7.3592		0.03635	0.526546	0.0669559	1.32669	-0.765721	0.678909	2.18183	1.77554	-0.569015	-0.315934
0.0364	2.02908	-1.41255	2.20159	-0.27322	-1.82527	-0.39715	-2.10747	0.90379	-0.65989		0.0364	-5.81775	3.03348	2.83221	1.59054	-3.70912	2.56591	1.41519	-2.8101	-8.04567		0.0364	0.528853	0.0666619	1.33044	-0.770473	0.67433	2.17945	1.77857	-0.570367	-0.31889
0.03645	2.02171	-1.43846	2.19811	-0.26004	-1.85328	-0.39628	-2.10005	0.89751	-0.67001		0.03645	-5.64614	2.09739	4.82922	4.30522	-3.41268	2.4411	2.16407	-2.20163	-5.73663		0.03645	0.531206	0.066371	1.33402	-0.775317	0.669705	2.17705	1.78164	-0.571678	-0.32192
0.0365	2.01424	-1.46428	2.1941	-0.24667	-1.8811	-0.39567	-2.09239	0.89126	-0.68011		0.0365	-3.44631	0.818053	2.50457	4.75767	-3.35028	4.46931	1.66482	-1.28114	-5.4558		0.0365	0.533604	0.0660823	1.33743	-0.780252	0.665038	2.17463	1.78476	-0.572954	-0.325026
0.03655	2.00669	-1.49003	2.18956	-0.23312	-1.90874	-0.39531	-2.08448	0.88504	-0.69018		0.03655	-1.87054	-0.539289	0.429557	2.58904	-2.46099	5.92026	-1.59592	-0.220226	-5.83024		0.03655	0.536046	0.0657941	1.34068	-0.785278	0.66033	2.1722	1.78791	-0.57419	-0.328207
0.0366	1.99904	-1.51568	2.1845	-0.21938	-1.93617	-0.39522	-2.07635	0.87885	-0.70022		0.0366	-3.55552	-1.50659	1.03802	1.87137	-3.19426	6.16989	-3.99858	1.04351	-7.42161		0.0366	0.538532	0.0655044	1.34377	-0.790395	0.655583	2.16976	1.79111	-0.575394	-0.331463
0.03665	1.99131	-1.54124	2.17891	-0.20547	-1.9634	-0.39538	-2.06799	0.8727	-0.71023		0.03665	-3.86755	-1.94344	4.08034	0.950872	-3.95874	3.73603	-3.71775	1.04351	-9.07538		0.03665	0.541061	0.0652106	1.34669	-0.795602	0.650797	2.1673	1.79435	-0.576563	-0.334792
0.0367	1.98349	-1.5667	2.17281	-0.19139	-1.9904	-0.3958	-2.0594	0.86659	-0.72021		0.0367	-0.950046	-1.41298	3.6903	1.66855	-3.25667	-0.476408	-2.3136	1.37114	-8.42011		0.0367	0.543631	0.0649103	1.34944	-0.800897	0.645975	2.16483	1.79762	-0.577701	-0.338193
0.03675	1.97557	-1.59206	2.1662	-0.17715	-2.01718	-0.39648	-2.05059	0.86052	-0.73015		0.03675	1.04696	-2.62991	2.06773	2.63585	-2.11775	-2.37981	-2.26679	0.185416	-8.04567		0.03675	0.54624	0.0646008	1.35201	-0.80628	0.641115	2.16236	1.80094	-0.578808	-0.341665
0.0368	1.96756	-1.6173	2.15906	-0.16276	-2.04372	-0.39742	-2.04156	0.85451	-0.74006		0.0368	-0.497598	-4.17447	2.59818	3.1507	-2.30497	-1.55292	-0.597421	-0.313836	-10.4951		0.0368	0.548888	0.0642791	1.35442	-0.811751	0.636221	2.15988	1.80429	-0.579885	-0.345207
0.03685	1.95946	-1.64244	2.15142	-0.14821	-2.07001	-0.39863	-2.03232	0.84856	-0.74992		0.03685	-3.49311	-2.33348	3.28465	2.01178	-4.62961	1.14616	2.69452	2.21363	-11.4468		0.03685	0.551573	0.0639443	1.35665	-0.817309	0.631294	2.15739	1.80768	-0.580934	-0.348819
0.0369	1.95127	-1.66745	2.14327	-0.13352	-2.09605	-0.40009	-2.02286	0.84266	-0.75975		0.0369	-6.05178	-0.242858	4.81361	-1.01493	-5.20687	2.17587	5.45601	3.61777	-9.79306		0.0369	0.554293	0.063594	1.35871	-0.822952	0.626335	2.1549	1.8111	-0.581958	-0.352499
0.03695	1.94298	-1.69234	2.13461	-0.1187	-2.12182	-0.40183	-2.01321	0.83684	-0.76954		0.03695	-5.55253	-0.710907	3.7371	-0.562486	-5.20687	2.81554	5.73684	2.85329	-9.2782		0.03695	0.557046	0.0632268	1.3606	-0.828679	0.621344	2.15242	1.81457	-0.582959	-0.356247
0.037	1.9346	-1.7171	2.12546	-0.10374	-2.14732	-0.40383	-2.00334	0.83109	-0.77928		0.037	-4.55402	-1.00734	1.55287	0.935271	-4.09916	5.3586	3.06896	4.00782	-8.84136		0.037	0.559832	0.0628392	1.36232	-0.834488	0.616321	2.14994	1.81807	-0.583938	-0.360062
0.03705	1.92613	-1.74172	2.1158	-0.08867	-2.17253	-0.40609	-1.99329	0.82541	-0.78897		0.03705	-5.3497	-1.36618	1.24084	1.84017	-1.43128	4.46931	0.697515	2.60367	-8.13928		0.03705	0.562649	0.0624302	1.36386	-0.84038	0.611269	2.14746	1.8216	-0.584897	-0.363942
0.0371	1.91756	-1.7662	2.10565	-0.07347	-2.19745	-0.40863	-1.98303	0.81981	-0.79861		0.0371	-4.14838	-1.47539	1.14723	4.00879	-1.11925	1.20857	0.572701	0.51305	-6.29829		0.0371	0.565495	0.0619969	1.36522	-0.846352	0.606187	2.14499	1.82517	-0.585836	-0.367888
0.03715	1.90889	-1.79054	2.09501	-0.05817	-2.22207	-0.41142	-1.97259	0.8143	-0.8082		0.03715	-3.74274	-0.133647	1.7713	2.40182	-5.65932	-0.3984	0.869132	-0.532259	-4.58211		0.03715	0.568371	0.0615367	1.36641	-0.852403	0.601076	2.14253	1.82876	-0.586761	-0.371901
0.0372	1.90014	-1.81473	2.08389	-0.04276	-2.24638	-0.41449	-1.96196	0.80888	-0.81774		0.0372	-4.16398	-0.0712402	2.48897	-1.15535	-7.79674	-0.554416	0.525897	-2.98171	-4.03605		0.0372	0.571273	0.0610481	1.36742	-0.858533	0.595938	2.14008	1.83239	-0.587671	-0.375981
0.03725	1.89128	-1.83876	2.07228	-0.02726	-2.27036	-0.41782	-1.95115	0.80356	-0.82721		0.03725	-4.69444	-1.84983	4.45478	-3.80762	-5.01965	1.11496	-0.347795	-1.81159	-3.14676		0.03725	0.574203	0.060529	1.36826	-0.86474	0.590772	2.13764	1.83604	-0.588569	-0.380128
0.0373	1.88233	-1.86263	2.0602	-0.01167	-2.29402	-0.42143	-1.94016	0.79834	-0.83663		0.0373	-5.08448	-1.21016	4.95403	-3.97924	-3.75592	2.31628	-0.550616	1.9172	-2.27307		0.0373	0.57716	0.0599777	1.36892	-0.871023	0.585579	2.13521	1.83972	-0.589454	-0.384341
0.03735	1.87329	-1.88633	2.04764	0.00401	-2.31734	-0.42529	-1.92899	0.79322	-0.84598		0.03735	-7.03468	0.490418	3.31586	-2.45028	-4.83243	1.13056	-0.238583	2.71288	0.160784		0.03735	0.580143	0.0593931	1.36941	-0.87738	0.58036	2.13281	1.84342	-0.590328	-0.388622
0.0374	1.86415	-1.90985	2.03462	0.01976	-2.34032	-0.42943	-1.91766	0.7882	-0.85527		0.0374	-5.67734	0.646435	3.14424	-2.23186	-5.05086	1.16176	-0.0981686	1.85479	1.03448		0.0374	0.58315	0.0587716	1.36972	-0.883809	0.575116	2.13042	1.84715	-0.591194	-0.392968
0.03745	1.85492	-1.9332	2.02114	0.03558	-2.36293	-0.43384	-1.90616	0.78331	-0.86449		0.03745	-5.3185	1.11448	2.52017	-2.91833	-5.33169	2.4411	0.494693	2.29164	-2.38228		0.03745	0.58618	0.0581109	1.36987	-0.890308	0.569846	2.12805	1.85089	-0.592054	-0.397378
0.0375	1.84559	-1.95637	2.0072	0.05147	-2.38519	-0.43851	-1.89451	0.77853	-0.87364		0.0375	-4.61643	0.927264	-0.756167	-3.79202	-2.96024	1.13056	-0.0357621	2.63487	-5.09696		0.0375	0.589232	0.0574072	1.36983	-0.896876	0.564554	2.12572	1.85466	-0.592909	-0.401853
0.03755	1.83617	-1.97934	1.99281	0.06741	-2.40707	-0.44345	-1.88269	0.77387	-0.88271		0.03755	-4.66323	-1.02294	-2.69077	-3.19916	-0.214351	0.506494	1.33718	2.74408	-4.08286		0.03755	0.592304	0.0566583	1.36963	-0.90351	0.55924	2.1234	1.85844	-0.59376	-0.406391
0.0376	1.82666	-2.00212	1.97798	0.08339	-2.42857	-0.44865	-1.87073	0.76934	-0.8917		0.0376	-5.3341	-3.31638	-0.678159	-2.06024	-0.900822	1.14616	4.73834	3.04051	-3.75522		0.0376	0.595397	0.0558606	1.36925	-0.91021	0.553905	2.12111	1.86224	-0.594612	-0.410992
0.03765	1.81705	-2.0247	1.96271	0.09942	-2.44968	-0.45413	-1.85861	0.76494	-0.90062		0.03765	-4.67883	-2.47389	2.17694	-0.375266	-2.88223	3.03396	3.4434	2.21363	-1.47739		0.03765	0.598509	0.0550114	1.3687	-0.916973	0.548551	2.11886	1.86606	-0.595467	-0.415655
0.0377	1.80735	-2.04708	1.94701	0.11549	-2.4704	-0.45986	-1.84635	0.76067	-0.90945		0.0377	-2.21378	-2.31787	2.02092	0.623238	-3.94314	2.69072	0.0578477	1.79238	0.972069		0.0377	0.601637	0.0541094	1.36797	-0.923798	0.543179	2.11663	1.86989	-0.596324	-0.420381
0.03775	1.79755	-2.06924	1.93088	0.13158	-2.49071	-0.46587	-1.83395	0.75654	-0.91819		0.03775	-2.3854	-3.14476	0.991215	0.997677	-2.47659	1.78583	0.822328	1.62077	1.39331		0.03775	0.604783	0.0531524	1.36708	-0.930682	0.537788	2.11443	1.87374	-0.597187	-0.425168
0.0378	1.78767	-2.09118	1.91433	0.14769	-2.5106	-0.47213	-1.82142	0.75256	-0.92684		0.0378	-4.03917	-2.81713	-0.225712	-0.952526	-1.6653	4.53171	-0.503811	1.71438	0.769248		0.0378	0.607944	0.0521386	1.36601	-0.937623	0.53238	2.11226	1.8776	-0.598057	-0.430018
0.03785	1.77769	-2.11291	1.89737	0.16381	-2.53007	-0.47866	-1.80876	0.74872	-0.9354		0.03785	-7.79916	2.62784	-1.94189	-3.91684	-3.25667	3.92325	-0.956258	3.60217	-1.02494		0.03785	0.61112	0.0510665	1.36477	-0.944617	0.526957	2.11013	1.88147	-0.598936	-0.43493
0.0379	1.76762	-2.1344	1.88	0.17994	-2.54912	-0.48545	-1.79597	0.74504	-0.94386		0.0379	-8.2048	6.18501	0.741589	-4.29127	-4.4892	0.350478	-1.11227	3.77379	-3.30278		0.0379	0.614312	0.049934	1.36335	-0.951661	0.52152	2.10803	1.88536	-0.599825	-0.439904
0.03795	1.75746	-2.15566	1.86223	0.19608	-2.56772	-0.4925	-1.78306	0.7415	-0.95222		0.03795	-3.80514	4.37522	1.72449	-0.79651	-5.4877	1.66101	0.791124	1.48035	-5.76783		0.03795	0.617517	0.0487402	1.36176	-0.95875	0.516071	2.10597	1.88925	-0.600726	-0.444939
0.038	1.7472	-2.17668	1.84408	0.2122	-2.58588	-0.49981	-1.77003	0.73813	-0.96048		0.038	-2.55701	2.69025	-1.27102	1.06008	-5.16007	3.95445	1.94564	-0.657072	-7.03157		0.038	0.620737	0.0474823	1.36	-0.965881	0.510611	2.10395	1.89316	-0.601639	-0.450033
0.03805	1.73686	-2.19746	1.82553	0.22831	-2.60359	-0.50738	-1.75689	0.73492	-0.96863		0.03805	-3.91436	0.584028	-3.59566	-2.35667	-2.41418	1.94184	0.36988	0.747075	-8.3265		0.03805	0.623969	0.046159	1.35806	-0.97305	0.505143	2.10196	1.89707	-0.602567	-0.455187
0.0381	1.72644	-2.21798	1.80662	0.2444	-2.62084	-0.51521	-1.74364	0.73187	-0.97667		0.0381	-4.92846	-2.19306	-4.23533	-4.99335	-0.120741	1.77023	1.14996	1.69877	-7.03157		0.0381	0.627213	0.0447689	1.35596	-0.980253	0.499669	2.10002	1.90099	-0.603509	-0.460399
0.03815	1.71592	-2.23825	1.78733	0.26046	-2.63762	-0.52329	-1.73029	0.72899	-0.9846		0.03815	-4.72564	-3.12916	-2.0199	-4.21327	-1.36887	2.53471	2.99095	-0.469852	-1.07174		0.03815	0.630469	0.0433091	1.3537	-0.987487	0.494189	2.09812	1.90491	-0.604467	-0.465671
0.0382	1.70531	-2.25826	1.76768	0.27648	-2.65392	-0.53162	-1.71684	0.72629	-0.99241		0.0382	-2.93145	-3.00435	-1.50505	-3.51119	-2.92903	2.19147	2.53851	-1.18753	1.92377		0.0382	0.633735	0.0417775	1.35126	-0.994747	0.488706	2.09626	1.90884	-0.605443	-0.471001
0.03825	1.69462	-2.278	1.74768	0.29246	-2.66975	-0.5402	-1.70329	0.72375	-1.0001		0.03825	-3.57112	-3.08235	-2.39434	-2.66871	-2.47659	2.69072	1.16556	0.684668	2.17339		0.03825	0.637011	0.0401725	1.34867	-1.00203	0.483219	2.09444	1.91276	-0.606434	-0.47639
0.0383	1.68385	-2.29747	1.72734	0.30839	-2.68509	-0.54903	-1.68965	0.7214	-1.00766		0.0383	-4.03917	-2.02144	-3.11201	-5.74223	-1.6185	4.01686	1.72722	2.21363	3.03148		0.0383	0.640297	0.0384919	1.34591	-1.00933	0.477732	2.09267	1.91668	-0.607441	-0.481835
0.03835	1.67299	-2.31666	1.70666	0.32427	-2.69993	-0.55811	-1.67593	0.71923	-1.0151		0.03835	-3.49311	0.584028	-1.73907	-7.66123	-1.41568	2.4723	3.36539	2.52566	3.73356		0.03835	0.64359	0.0367336	1.343	-1.01665	0.472247	2.09095	1.9206	-0.608469	-0.487337
0.0384	1.66204	-2.33557	1.68565	0.34008	-2.71427	-0.56744	-1.66212	0.71724	-1.0224		0.0384	-4.14838	0.178386	0.117524	-2.77792	-0.947627	3.09636	2.22647	3.50856	3.2187		0.0384	0.646891	0.0348963	1.33992	-1.02398	0.466765	2.08927	1.92452	-0.609517	-0.492894
0.03845	1.65101	-2.35419	1.66432	0.35582	-2.7281	-0.57701	-1.64824	0.71545	-1.02957		0.03845	-5.19369	2.12859	0.164329	3.55634	-1.08804	4.04806	0.666311	4.05462	1.98617		0.03845	0.650198	0.0329787	1.33669	-1.03132	0.461291	2.08765	1.92843	-0.610584	-0.498504
0.0385	1.6399	-2.37252	1.64268	0.37148	-2.74142	-0.58681	-1.63428	0.71384	-1.0366		0.0385	-5.38091	4.60925	-0.615753	5.27252	0.737349	3.36159	2.36689	3.33695	-0.120045		0.0385	0.653509	0.0309804	1.3333	-1.03867	0.455825	2.08607	1.93234	-0.611674	-0.504169
0.03855	1.62871	-2.39055	1.62074	0.38706	-2.75422	-0.59686	-1.62026	0.71242	-1.04349		0.03855	-2.90025	0.708841	-0.709362	3.22871	2.2195	1.91064	3.59942	0.965497	-0.712907		0.03855	0.656822	0.0289006	1.32975	-1.04601	0.450369	2.08455	1.93624	-0.612785	-0.509888
0.0386	1.61744	-2.40828	1.59851	0.40255	-2.7665	-0.60713	-1.60617	0.7112	-1.05023		0.0386	-1.96415	-1.39738	0.585573	2.79186	3.84207	-0.211181	2.66332	2.18242	0.082776		0.0386	0.660134	0.0267378	1.32605	-1.05336	0.444925	2.08307	1.94013	-0.613918	-0.515659
0.03865	1.60609	-2.42569	1.576	0.41794	-2.77824	-0.61764	-1.59202	0.71018	-1.05682		0.03865	-3.57112	-2.13066	0.0239142	2.35502	2.64075	-1.11608	1.46199	1.83919	-0.291663		0.03865	0.663443	0.0244914	1.32219	-1.0607	0.439495	2.08164	1.94401	-0.615074	-0.521482
0.0387	1.59467	-2.4428	1.5532	0.43322	-2.78945	-0.62838	-1.57782	0.70936	-1.06326		0.0387	-5.11568	-3.45679	-1.0838	-0.765307	1.06498	1.92624	1.43079	-0.469852	2.90667		0.0387	0.666746	0.02216	1.31819	-1.06804	0.434079	2.08026	1.94788	-0.616253	-0.527357
0.03875	1.58316	-2.45958	1.53015	0.44839	-2.80011	-0.63935	-1.56356	0.70874	-1.06954		0.03875	-4.21079	-3.83123	-0.444135	-3.79202	1.62664	3.22118	1.30598	-1.31234	7.0099		0.03875	0.670042	0.0197415	1.31404	-1.07536	0.428682	2.07892	1.95174	-0.617455	-0.533282
0.0388	1.57158	-2.47604	1.50684	0.46344	-2.81023	-0.65053	-1.54926	0.70832	-1.07566		0.0388	-3.85195	-5.15737	1.11603	-5.91384	3.56124	1.72342	-0.0357621	-1.53076	7.30633		0.0388	0.673329	0.0172349	1.30975	-1.08267	0.423304	2.07764	1.95559	-0.618678	-0.539255
0.03885	1.55993	-2.49217	1.48328	0.47837	-2.8198	-0.66194	-1.53492	0.70811	-1.08161		0.03885	-3.3839	-6.03106	1.53727	-6.06986	2.43793	2.73753	-0.831445	-1.71798	5.69936		0.03885	0.676607	0.0146371	1.30531	-1.08996	0.417952	2.0764	1.95942	-0.619921	-0.545277
0.0389	1.5482	-2.50797	1.45949	0.49316	-2.82881	-0.67356	-1.52054	0.70811	-1.0874		0.0389	-4.85045	-6.67073	1.24084	-4.22887	0.612536	5.04657	0.120254	-0.376243	3.2031		0.0389	0.679877	0.0119479	1.30073	-1.09724	0.412625	2.07521	1.96323	-0.621186	-0.551344
0.03895	1.5364	-2.52343	1.43547	0.50782	-2.83726	-0.6854	-1.50613	0.70832	-1.09301		0.03895	-5.05327	-6.48351	-0.662557	-1.639	1.33021	5.73304	0.759921	0.0918062	4.1548		0.03895	0.683135	0.00916552	1.29601	-1.10449	0.407328	2.07407	1.96702	-0.62247	-0.557455
0.039	1.52453	-2.53855	1.41124	0.52232	-2.84514	-0.69744	-1.49169	0.70874	-1.09845		0.039	-4.47601	-5.62542	-1.81708	1.30971	4.29452	5.70184	1.07195	-0.423048	6.0114		0.039	0.686384	0.00628979	1.29115	-1.11171	0.402061	2.07297	1.97079	-0.623773	-0.563611
0.03905	1.51259	-2.55332	1.3868	0.53668	-2.85246	-0.70969	-1.47723	0.70938	-1.10371		0.03905	-3.74274	-5.03256	-2.90919	3.1507	5.21502	6.12308	0.541498	-1.03151	5.65256		0.03905	0.689623	0.00331945	1.28615	-1.1189	0.39683	2.07193	1.97453	-0.625096	-0.569809
0.0391	1.50058	-2.56773	1.36216	0.55087	-2.8592	-0.72214	-1.46274	0.71023	-1.10879		0.0391	-3.04066	-5.07936	-1.80148	-0.234851	3.40523	7.05918	1.5556	-0.594665	3.82717		0.0391	0.692851	0.000254555	1.28102	-1.12606	0.391636	2.07093	1.97824	-0.626438	-0.57605
0.03915	1.4885	-2.5818	1.33733	0.5649	-2.86536	-0.73478	-1.44824	0.71129	-1.11368		0.03915	-3.60232	-5.89065	-2.0511	-4.21327	2.67195	5.96706	0.572701	-0.313836	1.2685		0.03915	0.696068	-0.00290635	1.27576	-1.13319	0.386481	2.06998	1.98193	-0.627802	-0.582332
0.0392	1.47636	-2.5955	1.31233	0.57876	-2.87095	-0.74762	-1.43373	0.71258	-1.11838		0.0392	-3.14988	-6.67073	-2.37874	-4.24447	2.79676	6.09188	0.151457	-1.49956	-0.603696		0.0392	0.699273	-0.00616429	1.27036	-1.14028	0.381365	2.06907	1.98558	-0.629186	-0.588654
0.03925	1.46415	-2.60883	1.28717	0.59244	-2.87595	-0.76065	-1.41922	0.71408	-1.12289		0.03925	-3.72714	-6.26509	-1.27102	-3.08995	3.54564	6.85636	1.85204	-1.73358	1.03448		0.03925	0.702466	-0.00952067	1.26482	-1.14732	0.37629	2.06822	1.9892	-0.630593	-0.595014
0.0393	1.45187	-2.6218	1.26185	0.60593	-2.88036	-0.77386	-1.4047	0.71579	-1.1272		0.0393	-1.68332	-5.75023	2.09893	-3.18356	4.94979	5.01537	2.4293	-2.7945	2.36061		0.0393	0.705648	-0.0129751	1.25916	-1.15433	0.37126	2.06741	1.99279	-0.632023	-0.60141
0.03935	1.43953	-2.63439	1.23638	0.61923	-2.88418	-0.78726	-1.39018	0.71773	-1.13131		0.03935	-1.26208	-5.56301	3.7215	-5.77343	4.79377	3.97006	1.86764	-2.10802	2.46983		0.03935	0.708816	-0.0165283	1.25337	-1.16129	0.366275	2.06665	1.99634	-0.633477	-0.60784
0.0394	1.42713	-2.64661	1.21078	0.63233	-2.88742	-0.80083	-1.37567	0.71989	-1.13521		0.0394	-3.86755	-5.76583	2.61378	-8.98737	3.73286	3.01836	1.89884	-2.37325	1.3153		0.0394	0.711974	-0.0201804	1.24745	-1.16821	0.361337	2.06594	1.99985	-0.634955	-0.614303
0.03945	1.41467	-2.65844	1.18505	0.64523	-2.89006	-0.81456	-1.36117	0.72227	-1.13891		0.03945	-7.03468	-4.82974	-0.225712	-8.76894	5.33983	0.709316	3.56821	-2.12363	2.90667		0.03945	0.715117	-0.0239322	1.24141	-1.17507	0.356448	2.06527	2.00332	-0.636456	-0.620799
0.0395	1.40215	-2.66989	1.15921	0.65791	-2.8921	-0.82847	-1.34668	0.72487	-1.1424		0.0395	-7.76796	-3.42559	-4.12612	-6.74073	5.48024	-1.22529	2.86614	-1.09392	4.29522		0.0395	0.718244	-0.0277843	1.23524	-1.18188	0.351605	2.06464	2.00675	-0.637981	-0.627325
0.03955	1.38957	-2.68096	1.13327	0.67038	-2.89354	-0.84254	-1.33221	0.72769	-1.14567		0.03955	-4.85045	-4.09646	-4.96861	-5.41459	5.9951	-1.3657	2.17967	-1.45276	4.42003		0.03955	0.721355	-0.0317365	1.22895	-1.18863	0.34681	2.06405	2.01013	-0.639528	-0.633881
0.0396	1.37694	-2.69163	1.10724	0.68262	-2.89439	-0.85676	-1.31777	0.73073	-1.14873		0.0396	-1.66772	-5.96866	-2.61276	-5.61741	5.43344	-0.944457	3.36539	-0.376243	4.74766		0.0396	0.724449	-0.035789	1.22255	-1.19533	0.34206	2.06351	2.01346	-0.641098	-0.640467
0.03965	1.36424	-2.7019	1.08113	0.69464	-2.89463	-0.87113	-1.30335	0.734	-1.15156		0.03965	-0.99685	-4.31488	-0.366127	-6.02306	1.57984	1.64541	2.92855	0.70027	2.76626		0.03965	0.727522	-0.039942	1.21603	-1.20197	0.337356	2.06301	2.01675	-0.642691	-0.647081
0.0397	1.3515	-2.71178	1.05494	0.70642	-2.89427	-0.88565	-1.28897	0.73748	-1.15417		0.0397	-2.01096	-3.95605	0.788394	-6.55351	0.534527	2.12906	1.00955	-0.360641	1.95497		0.0397	0.730575	-0.0441955	1.2094	-1.20854	0.332696	2.06256	2.01998	-0.644309	-0.653723
0.03975	1.3387	-2.72125	1.0287	0.71795	-2.8933	-0.90031	-1.27462	0.74119	-1.15655		0.03975	-3.19668	-4.84534	-1.50505	-2.88713	2.76556	3.12757	0.479092	-1.53076	4.1392		0.03975	0.733604	-0.0485503	1.20265	-1.21505	0.328082	2.06214	2.02316	-0.645949	-0.660392
0.0398	1.32584	-2.73032	1.0024	0.72924	-2.89174	-0.91511	-1.26031	0.74511	-1.1587		0.0398	-2.65062	-7.45081	-2.9404	0.420417	4.77817	6.18549	1.19677	-0.360641	2.90667		0.0398	0.736608	-0.0530059	1.1958	-1.22149	0.323513	2.06176	2.02628	-0.647615	-0.667087
0.03985	1.31294	-2.73898	0.97607	0.74027	-2.88956	-0.93004	-1.24604	0.74926	-1.16062		0.03985	-0.341582	-7.48201	-3.42405	0.623238	5.66746	8.61934	1.00955	0.481847	2.46983		0.03985	0.739587	-0.0575625	1.18883	-1.22787	0.31899	2.06143	2.02935	-0.649306	-0.673807
0.0399	1.29998	-2.74723	0.94971	0.75105	-2.88679	-0.94509	-1.23183	0.75362	-1.1623		0.0399	-1.02805	-4.98575	-3.9857	-1.87302	4.94979	5.96706	1.27477	-1.10952	2.62584		0.0399	0.742536	-0.0622196	1.18176	-1.23417	0.314512	2.06113	2.03237	-0.651024	-0.68055
0.03995	1.28697	-2.75506	0.92333	0.76156	-2.88341	-0.96026	-1.21766	0.7582	-1.16374		0.03995	-3.94556	-1.94344	-1.037	-5.55501	2.01668	2.16027	-1.00306	-1.12512	2.85987		0.03995	0.745456	-0.0669773	1.17459	-1.24039	0.310079	2.06087	2.03533	-0.652771	-0.687314
0.04	1.27392	-2.76248	0.89695	0.77179	-2.87942	-0.97554	-1.20355	0.763	-1.16494		0.04	-5.58373	-1.52219	1.8337	-5.18057	1.53303	3.76723	-2.07958	-1.14072	3.62435		0.04	0.748343	-0.0718343	1.16731	-1.24654	0.30569	2.06065	2.03823	-0.654548	-0.694099
0.04005	1.26082	-2.76948	0.87057	0.78176	-2.87483	-0.99093	-1.1895	0.76802	-1.16589		0.04005	-4.77244	-2.03705	0.616776	-3.32397	4.20091	5.77984	-1.59592	-0.438649	3.56194		0.04005	0.751196	-0.0767903	1.15993	-1.25261	0.301343	2.06047	2.04106	-0.656354	-0.700902
0.0401	1.24767	-2.77606	0.84421	0.79143	-2.86964	-1.00642	-1.17552	0.77325	-1.1666		0.0401	-4.05477	-2.31787	-0.256915	-1.6234	4.55975	3.29919	-1.04987	-1.10952	2.56344		0.0401	0.754015	-0.0818439	1.15244	-1.2586	0.297039	2.06033	2.04384	-0.65819	-0.707724
0.04015	1.23447	-2.78222	0.81788	0.80082	-2.86384	-1.022	-1.16161	0.77869	-1.16705		0.04015	-2.27618	-2.36468	-1.16181	-2.06024	3.79527	2.20707	-0.597421	-0.579064	2.75065		0.04015	0.756797	-0.086995	1.14487	-1.26451	0.292777	2.06023	2.04654	-0.660053	-0.714565
0.0402	1.22123	-2.78795	0.79158	0.80992	-2.85744	-1.03768	-1.14776	0.78434	-1.16725		0.0402	-0.99685	-1.49099	-1.70787	-2.93393	5.77667	3.4708	0.759921	-0.657072	4.42003		0.0402	0.759539	-0.0922429	1.1372	-1.27034	0.288556	2.06017	2.04919	-0.661948	-0.721424
0.04025	1.20795	-2.79325	0.76533	0.81872	-2.85045	-1.05344	-1.134	0.7902	-1.16719		0.04025	-1.85494	-3.06675	-1.41144	-2.37227	8.14812	3.11197	0.120254	-2.45126	6.71347		0.04025	0.76224	-0.0975862	1.12944	-1.27607	0.284376	2.06015	2.05176	-0.663872	-0.7283
0.0403	1.19463	-2.79812	0.73914	0.82721	-2.84286	-1.06927	-1.12031	0.79627	-1.16687		0.0403	-4.41361	-5.51621	-0.459736	-1.45178	7.43045	2.98715	0.65071	-2.54487	8.21122		0.0403	0.7649	-0.103025	1.12159	-1.28172	0.280238	2.06018	2.05427	-0.665828	-0.73519
0.04035	1.18126	-2.80257	0.71302	0.8354	-2.83467	-1.08518	-1.10671	0.80255	-1.16629		0.04035	-5.39651	-5.17297	-0.225712	-1.04614	6.18232	2.79993	1.69602	-0.891096	7.66517		0.04035	0.767516	-0.108559	1.11365	-1.28728	0.276141	2.06025	2.0567	-0.667817	-0.742093
0.0404	1.16785	-2.80658	0.68698	0.84327	-2.82589	-1.10115	-1.09319	0.80902	-1.16544		0.0404	-5.2873	-4.19007	-0.147704	-0.375266	6.35394	3.72043	1.10316	1.72998	5.1221		0.0404	0.770088	-0.11419	1.10564	-1.29275	0.272086	2.06036	2.05906	-0.669839	-0.749006
0.04045	1.15441	-2.81015	0.66103	0.85082	-2.81651	-1.11718	-1.07977	0.8157	-1.16433		0.04045	-5.10008	-1.21016	-1.56745	-1.28016	6.24472	4.62532	-1.28389	2.85329	2.40742		0.04045	0.772616	-0.119918	1.09754	-1.29813	0.268073	2.06052	2.06134	-0.671898	-0.755929
0.0405	1.14092	-2.8133	0.63518	0.85805	-2.80655	-1.13326	-1.06644	0.82258	-1.16295		0.0405	-4.75684	0.708841	-3.28363	-1.10854	4.76257	4.93736	-2.67244	2.33844	3.39032		0.0405	0.775096	-0.125742	1.08936	-1.30341	0.264099	2.06072	2.06354	-0.673995	-0.762859
0.04055	1.1274	-2.816	0.60945	0.86494	-2.79601	-1.14939	-1.05321	0.82966	-1.1613		0.04055	-5.77095	0.615232	-1.56745	-1.06174	3.28041	4.4069	-1.90796	-0.126617	3.71796		0.04055	0.777526	-0.131663	1.08111	-1.3086	0.260165	2.06096	2.06567	-0.67613	-0.769793
0.0406	1.11383	-2.81827	0.58383	0.87151	-2.78488	-1.16555	-1.04009	0.83693	-1.15938		0.0406	-6.2858	1.45772	-0.30372	-0.12564	2.48473	5.23379	-0.535014	-0.267031	3.45273		0.0406	0.779908	-0.137679	1.07279	-1.31368	0.256269	2.06125	2.06771	-0.678305	-0.776731
0.04065	1.10024	-2.8201	0.55835	0.87773	-2.77317	-1.18174	-1.02707	0.84439	-1.15718		0.04065	-4.25759	1.81656	1.61528	-1.26456	4.0605	4.79694	1.36838	0.372636	2.59464		0.04065	0.782237	-0.143791	1.0644	-1.31868	0.252411	2.06158	2.06967	-0.68052	-0.78367
0.0407	1.0866	-2.82149	0.53302	0.88361	-2.76089	-1.19796	-1.01417	0.85203	-1.1547		0.0407	-4.3668	0.521622	2.61378	-2.77792	6.44754	2.4723	1.32158	-0.610267	0.613231		0.0407	0.784515	-0.149997	1.05595	-1.32357	0.248588	2.06195	2.07155	-0.682775	-0.790609
0.04075	1.07293	-2.82245	0.50783	0.88915	-2.74804	-1.2142	-1.00137	0.85987	-1.15194		0.04075	-6.20779	-2.30227	2.28615	-2.40348	8.42895	0.444088	-1.79875	0.51305	-1.571		0.04075	0.786739	-0.156299	1.04743	-1.32836	0.244799	2.06236	2.07335	-0.685072	-0.797547
0.0408	1.05923	-2.82296	0.48281	0.89433	-2.73462	-1.23045	-0.9887	0.86788	-1.1489		0.0408	-5.67734	-2.36468	0.195532	-2.02904	5.9795	2.19147	-3.2497	-0.313836	0.0515727		0.0408	0.788909	-0.162696	1.03885	-1.33305	0.241043	2.06282	2.07506	-0.687411	-0.80448
0.04085	1.04549	-2.82304	0.45797	0.89915	-2.72064	-1.2467	-0.97615	0.87607	-1.14558		0.04085	-5.10008	-0.445679	-3.12761	-2.26306	3.38963	4.3601	-1.20588	-3.10653	3.39032		0.04085	0.791024	-0.16919	1.03021	-1.33763	0.237319	2.06332	2.07669	-0.689794	-0.811406
0.0409	1.03172	-2.82267	0.4333	0.90361	-2.70611	-1.26296	-0.96372	0.88444	-1.14198		0.0409	-3.83635	-0.305265	-5.60827	-2.10705	2.70315	4.76574	-0.753437	-2.76329	2.79746		0.0409	0.793082	-0.175781	1.02153	-1.34211	0.233626	2.06387	2.07824	-0.692218	-0.818323
0.04095	1.01792	-2.82187	0.40884	0.90771	-2.69102	-1.2792	-0.95142	0.89298	-1.13809		0.04095	-3.50871	-1.45979	-3.9389	-1.6858	4.1073	2.84674	-0.503811	-0.719478	0.223191		0.04095	0.795083	-0.182467	1.01279	-1.34647	0.229961	2.06446	2.07969	-0.694686	-0.82523
0.041	1.00408	-2.82063	0.38457	0.91143	-2.67539	-1.29542	-0.93925	0.90168	-1.13391		0.041	-1.94855	-0.944931	-2.9716	-1.96663	5.26182	4.68773	-0.191778	-0.282633	-1.22776		0.041	0.797026	-0.18925	1.004	-1.35073	0.226324	2.0651	2.08106	-0.697198	-0.832124
0.04105	0.99021	-2.81895	0.36052	0.91479	-2.65921	-1.31163	-0.92722	0.91055	-1.12945		0.04105	-1.23087	-1.27257	-4.64097	-1.51418	4.48174	8.2605	-0.488209	1.24633	0.956467		0.04105	0.79891	-0.196127	0.995177	-1.35488	0.222713	2.06578	2.08234	-0.699755	-0.839005
0.0411	0.97632	-2.81683	0.33669	0.91776	-2.6425	-1.3278	-0.91533	0.91958	-1.12469		0.0411	-3.96116	-0.944931	-4.68778	-2.37227	3.23361	8.2137	-1.26829	2.18242	3.1719		0.0411	0.800734	-0.203098	0.986311	-1.35892	0.219126	2.06651	2.08353	-0.702359	-0.845872
0.04115	0.96239	-2.81428	0.31309	0.92036	-2.62525	-1.34393	-0.90358	0.92876	-1.11964		0.04115	-5.42771	0.724443	-2.39434	-4.80613	2.2195	3.4084	-1.67393	1.49595	2.15779		0.04115	0.8025	-0.210162	0.977409	-1.36284	0.215563	2.06728	2.08463	-0.705009	-0.852722
0.0412	0.94843	-2.81129	0.28974	0.92256	-2.60749	-1.36002	-0.89198	0.9381	-1.11431		0.0412	-5.53692	0.178386	-2.59716	-6.05426	2.00108	0.17886	-1.3931	0.060603	0.519622		0.0412	0.804206	-0.217316	0.968473	-1.36665	0.212024	2.0681	2.08564	-0.707708	-0.859553
0.04125	0.93444	-2.80786	0.26664	0.92438	-2.5892	-1.37606	-0.88052	0.94758	-1.10868		0.04125	-3.33709	-1.02294	-3.75168	-5.10256	2.29751	2.4723	-1.15908	0.60666	0.956467		0.04125	0.805852	-0.224562	0.959505	-1.37035	0.208508	2.06895	2.08656	-0.710457	-0.866366
0.0413	0.92042	-2.804	0.24379	0.92581	-2.57041	-1.39204	-0.86922	0.9572	-1.10275		0.0413	-2.07336	0.740045	-2.40994	-4.24447	2.90598	4.07927	-0.503811	6.03603	1.51813		0.0413	0.807438	-0.2319	0.950511	-1.37393	0.205015	2.06985	2.0874	-0.713253	-0.87316
0.04135	0.90638	-2.79971	0.22122	0.92684	-2.55111	-1.40796	-0.85808	0.96697	-1.09653		0.04135	-1.80814	2.269	0.242337	-5.11816	4.51294	3.64242	-0.550616	7.61179	-0.759712		0.04135	0.808962	-0.239325	0.941493	-1.37739	0.201543	2.0708	2.08814	-0.7161	-0.879934
0.0414	0.8923	-2.79499	0.19892	0.92748	-2.53131	-1.4238	-0.84709	0.97686	-1.09002		0.0414	-3.57112	1.87896	1.10043	-4.13526	2.65635	3.11197	-0.254185	4.74109	-3.5056		0.0414	0.810424	-0.24684	0.932451	-1.38074	0.198092	2.07178	2.0888	-0.718997	-0.886686
0.04145	0.8782	-2.78985	0.17691	0.92771	-2.51103	-1.43956	-0.83627	0.98689	-1.08321		0.04145	-4.05477	-0.0400369	0.585573	-3.07435	-0.666798	3.79844	-0.30099	1.9484	-1.71141		0.04145	0.811824	-0.254441	0.923391	-1.38398	0.194658	2.07281	2.08936	-0.721946	-0.893416
0.0415	0.86407	-2.78427	0.1552	0.92754	-2.49026	-1.45524	-0.82561	0.99703	-1.0761		0.0415	-4.22639	-1.35057	-0.522143	-4.07285	2.85917	4.65653	-0.69103	-1.15632	0.3168		0.0415	0.813161	-0.262128	0.914314	-1.38709	0.191241	2.07388	2.08983	-0.724947	-0.900123
0.04155	0.84991	-2.77827	0.13379	0.92695	-2.46901	-1.47082	-0.81512	1.0073	-1.0687		0.04155	-4.85045	-1.45979	0.335947	-4.79053	6.9468	6.13868	-2.23559	-6.6793	1.09688		0.04155	0.814435	-0.2699	0.905219	-1.39008	0.187838	2.07498	2.09021	-0.728002	-0.906804
0.0416	0.83572	-2.77185	0.11269	0.92596	-2.4473	-1.4863	-0.80481	1.01768	-1.061		0.0416	-2.88465	-0.757712	1.61528	-5.27418	5.90149	6.52872	-1.53352	-9.01955	1.86136		0.0416	0.815644	-0.277756	0.896113	-1.39295	0.184449	2.07612	2.0905	-0.731111	-0.91346
0.04165	0.8215	-2.76501	0.09192	0.92455	-2.42514	-1.50167	-0.79466	1.02817	-1.05301		0.04165	-1.09046	-0.991736	-0.39733	-4.75932	3.32722	5.343	-0.847047	-6.27366	2.267		0.04165	0.816789	-0.285696	0.886995	-1.39571	0.181073	2.0773	2.0907	-0.734273	-0.920087
0.0417	0.80726	-2.75775	0.07147	0.92273	-2.40252	-1.51693	-0.7847	1.03876	-1.04472		0.0417	-0.856436	-2.77032	-1.17741	-2.79352	3.20241	3.4084	-1.79875	-4.99432	2.40742		0.0417	0.817868	-0.29372	0.87787	-1.39835	0.177709	2.07851	2.0908	-0.737489	-0.92669
0.04175	0.79299	-2.75008	0.05136	0.92048	-2.37945	-1.53207	-0.77492	1.04945	-1.03613		0.04175	-2.93145	-3.80003	-1.62986	-1.84182	2.25071	2.36309	-3.92057	-5.18154	2.59464		0.04175	0.81888	-0.301826	0.868743	-1.40087	0.174356	2.07975	2.09081	-0.740759	-0.933263
0.0418	0.7787	-2.742	0.03159	0.91782	-2.35596	-1.54707	-0.76532	1.06023	-1.02725		0.0418	-4.81925	-3.16036	-4.42255	-1.48298	0.206893	3.14317	-5.02828	-4.55748	2.48543		0.0418	0.819825	-0.310014	0.859615	-1.40327	0.171012	2.08103	2.09071	-0.744084	-0.939807
0.04185	0.76438	-2.7335	0.01217	0.91473	-2.33204	-1.56194	-0.75591	1.0711	-1.01807		0.04185	-3.11867	-1.03854	-5.54587	-1.54539	2.11029	5.10897	-5.38712	-5.7432	2.42302		0.04185	0.820701	-0.318281	0.850491	-1.40555	0.167676	2.08233	2.09053	-0.747463	-0.946322
0.0419	0.75003	-2.72461	-0.00688	0.91121	-2.3077	-1.57667	-0.74668	1.08205	-1.0086		0.0419	-1.23087	-1.569	-6.09192	-2.87153	4.84058	6.2947	-6.43243	-5.85241	2.2046		0.0419	0.821509	-0.326627	0.841372	-1.40772	0.164345	2.08367	2.09025	-0.750899	-0.952804
0.04195	0.73565	-2.71531	-0.02557	0.90726	-2.28296	-1.59124	-0.73765	1.09307	-0.99883		0.04195	-1.21527	-2.02144	-5.71749	-4.05725	5.52705	6.02947	-5.55874	-5.86802	3.54634		0.04195	0.822246	-0.335049	0.832265	-1.40976	0.161017	2.08504	2.08987	-0.754392	-0.959255
0.042	0.72125	-2.70562	-0.04389	0.90289	-2.25782	-1.60566	-0.72882	1.10417	-0.98877		0.042	-2.66622	-0.679704	-4.20413	-3.13675	3.14	4.89055	-3.93617	-6.08644	5.30932		0.042	0.822913	-0.343544	0.823167	-1.41169	0.157689	2.08643	2.0894	-0.757943	-0.965672
0.04205	0.70682	-2.69553	-0.06183	0.89808	-2.23229	-1.61992	-0.72018	1.11533	-0.97841		0.04205	-3.21228	-1.05414	-1.45824	-0.0164285	0.706145	6.65354	-1.93916	-7.70901	4.71646		0.04205	0.82351	-0.352112	0.814086	-1.41349	0.154361	2.08785	2.08883	-0.761551	-0.972053
0.0421	0.69236	-2.68505	-0.07938	0.89283	-2.20639	-1.634	-0.71175	1.12654	-0.96777		0.0421	-3.29029	-0.83572	1.53727	-0.858916	1.221	6.73154	-0.0669653	-8.6295	4.35762		0.0421	0.824035	-0.360749	0.805022	-1.41518	0.151031	2.08929	2.08817	-0.765218	-0.978397
0.04215	0.67787	-2.67418	-0.09654	0.88716	-2.18012	-1.64791	-0.70352	1.13781	-0.95683		0.04215	-3.71153	-0.788915	1.11603	-0.780908	3.26481	4.53171	-0.862648	-9.25357	4.62285		0.04215	0.824488	-0.369454	0.795976	-1.41675	0.147698	2.09077	2.08741	-0.768943	-0.984705
0.0422	0.66336	-2.66293	-0.1133	0.88104	-2.15349	-1.66163	-0.69549	1.14912	-0.9456		0.0422	-4.74124	-1.13215	-1.70787	1.66855	4.27892	4.09487	-3.00007	-10.4549	4.06119		0.0422	0.824868	-0.378225	0.786953	-1.4182	0.144359	2.09226	2.08656	-0.772725	-0.990974
0.04225	0.64882	-2.65131	-0.12965	0.87448	-2.12651	-1.67516	-0.68767	1.16047	-0.93409		0.04225	-2.93145	-0.133647	-2.79998	0.826059	4.43493	2.79993	-3.43692	-10.4549	1.98617		0.04225	0.825175	-0.387059	0.777955	-1.41952	0.141014	2.09378	2.08561	-0.776566	-0.997201
0.0423	0.63426	-2.63931	-0.14559	0.86748	-2.09919	-1.6885	-0.68007	1.17186	-0.92228		0.0423	-2.35419	0.0691745	-3.9545	-0.453274	3.85767	3.17437	-3.12488	-9.45639	1.37771		0.0423	0.825409	-0.395952	0.768984	-1.42073	0.137661	2.09532	2.08457	-0.780469	-1.00339
0.04235	0.61967	-2.62694	-0.16111	0.86005	-2.07155	-1.70163	-0.67267	1.18327	-0.91019		0.04235	-3.4307	0.474817	-4.14172	0.935271	1.53303	4.99976	-2.90646	-6.85092	2.68825		0.04235	0.825567	-0.404904	0.760044	-1.42181	0.134302	2.09689	2.08343	-0.784431	-1.00953
0.0424	0.60504	-2.61421	-0.17622	0.85216	-2.04359	-1.71455	-0.66549	1.1947	-0.89782		0.0424	-4.3512	-0.00883364	-5.18703	2.63585	0.503324	3.86084	-2.298	-4.82271	4.51364		0.0424	0.825648	-0.413912	0.751136	-1.42277	0.130936	2.09847	2.08219	-0.788454	-1.01562
0.04245	0.5904	-2.60112	-0.19089	0.84384	-2.01533	-1.72725	-0.65854	1.20614	-0.88517		0.04245	-3.27469	-0.882525	-5.03101	1.37212	1.34581	1.11496	-1.26829	-5.21275	2.50103		0.04245	0.825652	-0.422972	0.742265	-1.42361	0.127564	2.10007	2.08086	-0.792539	-1.02167
0.0425	0.57572	-2.58768	-0.20513	0.83507	-1.98677	-1.73974	-0.6518	1.2176	-0.87223		0.0425	0.391694	-3.09796	-3.72048	0.342409	3.26481	1.45819	-2.64123	-5.11914	0.753646		0.0425	0.825577	-0.432082	0.733432	-1.42432	0.124187	2.10169	2.07943	-0.796682	-1.02766
0.04255	0.56101	-2.57389	-0.21894	0.82585	-1.95793	-1.75199	-0.64528	1.22905	-0.85902		0.04255	2.90356	-4.61131	-3.20562	0.73245	3.01519	3.89205	-4.51343	-2.8101	0.488418		0.04255	0.825424	-0.44124	0.724642	-1.42491	0.120804	2.10331	2.0779	-0.800886	-1.0336
0.0426	0.54628	-2.55975	-0.2323	0.81619	-1.92882	-1.76401	-0.63899	1.2405	-0.84553		0.0426	4.02687	-2.5675	-1.50505	0.919669	0.84656	4.96856	-4.1858	-2.40445	1.33091		0.0426	0.825193	-0.450443	0.715898	-1.42538	0.117415	2.10495	2.07627	-0.805149	-1.03949
0.04265	0.53152	-2.54528	-0.24521	0.80608	-1.89944	-1.77578	-0.63293	1.25193	-0.83177		0.04265	4.37011	1.19249	-0.49094	1.41892	-1.96173	4.00126	-3.45252	-3.34055	0.00476786		0.04265	0.824883	-0.459687	0.707202	-1.42571	0.11402	2.1066	2.07454	-0.809474	-1.04533
0.0427	0.51672	-2.53048	-0.25768	0.79552	-1.86982	-1.78731	-0.62709	1.26335	-0.81773		0.0427	2.77874	1.91017	-0.272517	1.94938	-0.760408	2.33188	-1.95476	-2.99732	-3.14676		0.0427	0.824495	-0.468971	0.698559	-1.42593	0.110618	2.10826	2.0727	-0.81386	-1.0511
0.04275	0.5019	-2.51535	-0.26969	0.78452	-1.83995	-1.79859	-0.62149	1.27474	-0.80343		0.04275	0.594516	-0.492484	-0.97459	2.55784	1.09619	1.97305	-3.39011	-4.46387	-3.56801		0.04275	0.824025	-0.478292	0.689967	-1.42601	0.10721	2.10992	2.07077	-0.818308	-1.05681
0.0428	0.48705	-2.4999	-0.28124	0.77307	-1.80986	-1.80961	-0.61612	1.2861	-0.78886		0.0428	-3.86755	-3.12916	-0.00728908	1.74656	2.59394	3.15877	-4.48223	-6.33606	-2.14826		0.0428	0.823476	-0.487647	0.681433	-1.42597	0.103795	2.11159	2.06874	-0.822821	-1.06246
0.04285	0.47217	-2.48413	-0.29233	0.76117	-1.77956	-1.82036	-0.61099	1.29741	-0.77402		0.04285	-6.12979	-3.44119	1.19404	0.0771813	4.26332	2.83114	-3.2965	-6.92893	-1.83622		0.04285	0.822843	-0.497034	0.672954	-1.4258	0.100372	2.11326	2.06661	-0.827396	-1.06805
0.0429	0.45726	-2.46806	-0.30295	0.74882	-1.74905	-1.83084	-0.60609	1.30869	-0.75893		0.0429	-5.45892	-2.19306	2.69179	1.77776	3.42083	2.92475	-1.19028	-5.61839	-2.78792		0.0429	0.822127	-0.506453	0.664535	-1.42551	0.0969408	2.11493	2.06438	-0.832033	-1.07357
0.04295	0.44232	-2.45169	-0.31311	0.73603	-1.71835	-1.84105	-0.60143	1.3199	-0.74357		0.04295	-3.4307	-0.726509	1.11603	4.75767	2.73436	2.76873	-1.17468	-5.24395	0.348004		0.04295	0.821327	-0.5159	0.656179	-1.42508	0.0934994	2.1166	2.06205	-0.836731	-1.07902
0.043	0.42735	-2.43502	-0.32279	0.72279	-1.68747	-1.85098	-0.59702	1.33106	-0.72796		0.043	-2.07336	1.56693	1.22524	4.97609	3.57685	4.09487	-2.78165	-4.41706	1.17489		0.043	0.82044	-0.525373	0.647884	-1.42453	0.0900478	2.11825	2.05961	-0.841488	-1.0844
0.04305	0.41235	-2.41806	-0.332	0.7091	-1.65642	-1.86062	-0.59284	1.34216	-0.7121		0.04305	-2.52581	2.67465	2.02092	3.25991	4.54415	3.50201	-3.74895	-4.58868	0.472817		0.04305	0.819466	-0.53487	0.639653	-1.42384	0.086586	2.11991	2.05707	-0.846305	-1.08972
0.0431	0.39732	-2.40082	-0.34073	0.69497	-1.62522	-1.86998	-0.58891	1.35317	-0.69599		0.0431	-0.99685	3.39232	0.101922	2.88547	5.91709	0.45969	-3.82696	-5.94602	0.784849		0.0431	0.818403	-0.544385	0.63149	-1.42302	0.0831116	2.12155	2.05443	-0.85118	-1.09496
0.04315	0.38225	-2.3833	-0.34899	0.68039	-1.59387	-1.87903	-0.58523	1.36411	-0.67963		0.04315	1.54622	2.42502	-3.06521	2.47983	5.90149	-0.772839	-3.85816	-6.46088	3.71796		0.04315	0.817252	-0.553918	0.623395	-1.42208	0.0796253	2.12319	2.05168	-0.856112	-1.10013
0.0432	0.36716	-2.36552	-0.35677	0.66536	-1.5624	-1.88779	-0.58179	1.37496	-0.66303		0.0432	2.24829	3.92278	-4.43815	1.07569	3.1868	1.42699	-3.81136	-6.6637	4.48244		0.0432	0.816011	-0.563464	0.615372	-1.421	0.0761256	2.12481	2.04883	-0.861101	-1.10522
0.04325	0.35203	-2.34747	-0.36406	0.6499	-1.5308	-1.89624	-0.5786	1.38572	-0.6462		0.04325	1.49941	5.74817	-4.23533	-1.13975	-1.93053	1.505	-3.00007	-7.91183	1.93937		0.04325	0.814682	-0.573023	0.607422	-1.4198	0.0726127	2.12642	2.04587	-0.866146	-1.11024
0.0433	0.33687	-2.32917	-0.37087	0.63399	-1.49909	-1.90438	-0.57566	1.39638	-0.62912		0.0433	0.15767	4.56244	-2.75318	0.373612	-3.97434	0.100852	-1.20588	-8.28627	3.2187		0.0433	0.813264	-0.582594	0.599548	-1.41846	0.069086	2.12801	2.04281	-0.871248	-1.11519
0.04335	0.32168	-2.31062	-0.37719	0.61764	-1.4673	-1.9122	-0.57298	1.40692	-0.61182		0.04335	-2.04216	2.51863	-0.912184	1.85577	-0.698001	0.210063	1.02515	-7.22536	5.1221		0.04335	0.811757	-0.592176	0.591752	-1.41699	0.0655442	2.1296	2.03966	-0.876407	-1.12005
0.0434	0.30645	-2.29183	-0.38303	0.60085	-1.43541	-1.91971	-0.57054	1.41736	-0.59429		0.0434	-3.71153	0.755646	-0.662557	1.07569	2.59394	0.45969	3.33419	-4.80711	4.21721		0.0434	0.81016	-0.601768	0.584036	-1.41539	0.0619867	2.13116	2.0364	-0.881621	-1.12483
0.04345	0.2912	-2.27281	-0.38839	0.58362	-1.40346	-1.9269	-0.56836	1.42767	-0.57653		0.04345	-5.24049	-0.710907	-0.39733	1.15369	2.50033	0.94334	2.91295	-3.98022	4.74766		0.04345	0.808476	-0.611366	0.576401	-1.41366	0.0584125	2.13271	2.03303	-0.886892	-1.12953
0.0435	0.2759	-2.25356	-0.39325	0.56595	-1.37145	-1.93375	-0.56644	1.43785	-0.55856		0.0435	-5.06888	-0.102443	0.289142	1.51253	1.14299	0.958942	2.75693	-7.38137	5.62135		0.0435	0.806704	-0.620969	0.56885	-1.41181	0.0548207	2.13424	2.02956	-0.892219	-1.13415
0.04355	0.26058	-2.23409	-0.39763	0.54785	-1.3394	-1.94028	-0.56477	1.4479	-0.54037		0.04355	-4.44481	2.47183	-0.771769	2.88547	2.39112	1.11496	2.22647	-11.391	4.51364		0.04355	0.804844	-0.630575	0.561383	-1.40983	0.0512107	2.13575	2.02599	-0.897602	-1.13868
0.0436	0.24522	-2.21442	-0.40153	0.52931	-1.30731	-1.94647	-0.56335	1.4578	-0.52197		0.0436	-3.97676	2.37822	-0.241314	3.04149	3.95128	2.37869	-0.11377	-11.0478	1.81456		0.0436	0.802898	-0.640184	0.554002	-1.40773	0.0475808	2.13725	2.02232	-0.903042	-1.14312
0.04365	0.22983	-2.19454	-0.40493	0.51035	-1.2752	-1.95233	-0.5622	1.46756	-0.50336		0.04365	-3.72714	1.73855	0.27354	1.63734	2.29751	2.65952	-1.45551	-10.7201	0.457215		0.04365	0.800864	-0.649794	0.54671	-1.40549	0.0439295	2.13872	2.01855	-0.908538	-1.14747
0.0437	0.21441	-2.17446	-0.40785	0.49095	-1.24308	-1.95784	-0.5613	1.47716	-0.48455		0.0437	-3.77394	2.42502	1.47487	-0.12564	1.89187	2.87794	-1.89236	-11.1726	1.48692		0.0437	0.798743	-0.659402	0.539508	-1.40314	0.0402564	2.14018	2.01468	-0.914093	-1.15173
0.04375	0.19895	-2.1542	-0.41028	0.47113	-1.21096	-1.96301	-0.56067	1.48659	-0.46554		0.04375	-1.65212	3.96958	3.7215	0.997677	2.79676	1.66101	-4.13899	-11.7966	1.3153		0.04375	0.796536	-0.669007	0.532397	-1.40065	0.0365607	2.14162	2.0107	-0.919703	-1.1559
0.0438	0.18346	-2.13376	-0.41223	0.45088	-1.17886	-1.96783	-0.56029	1.49586	-0.44634		0.0438	0.142068	7.0431	3.00383	1.99618	3.70166	1.16176	-4.15459	-11.937	-0.400874		0.0438	0.794243	-0.678605	0.525379	-1.39805	0.0328413	2.14303	2.00663	-0.92537	-1.15998
0.04385	0.16793	-2.11314	-0.4137	0.43021	-1.14679	-1.97231	-0.56017	1.50495	-0.42694		0.04385	0.625719	8.38484	0.351548	2.62025	3.56124	3.81404	-2.68804	-13.0604	-0.35407		0.04385	0.791865	-0.688196	0.518458	-1.39531	0.0290962	2.14442	2.00246	-0.931096	-1.16396
0.0439	0.15237	-2.09236	-0.41468	0.40912	-1.11476	-1.97642	-0.56032	1.51386	-0.40737		0.0439	-2.16697	7.24592	-0.834175	2.82307	3.07759	6.77835	-2.42281	-12.3427	1.62734		0.0439	0.789403	-0.697778	0.511635	-1.39246	0.0253233	2.14578	1.99819	-0.936879	-1.16784
0.04395	0.13678	-2.07143	-0.41518	0.38761	-1.08278	-1.98018	-0.56073	1.52258	-0.38762		0.04395	-2.68183	4.65605	-0.444135	1.66855	0.284901	5.93586	-1.97036	-12.8887	2.07978		0.04395	0.786856	-0.707349	0.504912	-1.38948	0.0215204	2.14712	1.99382	-0.94272	-1.17164
0.044	0.12115	-2.05035	-0.41521	0.36569	-1.05087	-1.98359	-0.5614	1.53111	-0.36769		0.044	-2.69743	4.01639	0.164329	-2.18505	-1.55609	1.67662	1.5556	-14.2461	0.613231		0.044	0.784224	-0.716906	0.49829	-1.38638	0.0176858	2.14842	1.98936	-0.948617	-1.17534
0.04405	0.10549	-2.02912	-0.41475	0.34335	-1.01903	-1.98663	-0.56233	1.53943	-0.34759		0.04405	-1.94855	3.81357	0.226735	-4.41609	-1.72771	1.03695	2.02365	-15.9935	0.847256		0.04405	0.781507	-0.726452	0.491772	-1.38316	0.0138182	2.1497	1.98479	-0.954572	-1.17894
0.0441	0.08979	-2.00777	-0.41382	0.32061	-0.98729	-1.98931	-0.56353	1.54754	-0.32733		0.0441	-1.29328	3.42352	0.00831255	-1.43618	-0.0583345	2.28508	0.46349	-17.9281	2.09539		0.0441	0.778705	-0.735982	0.485356	-1.37981	0.00991769	2.15094	1.98013	-0.960583	-1.18245
0.04415	0.07406	-1.98629	-0.41243	0.29746	-0.95564	-1.99162	-0.56499	1.55544	-0.30691		0.04415	-1.21527	3.65755	0.445158	1.63734	0.971373	3.14317	-0.176177	-17.2728	0.878459		0.04415	0.775818	-0.745497	0.479044	-1.37635	0.00598344	2.15215	1.97537	-0.966651	-1.18585
0.0442	0.0583	-1.9647	-0.41056	0.27391	-0.9241	-1.99357	-0.56671	1.56312	-0.28634		0.0442	-2.10457	4.90568	1.10043	3.71236	0.986975	2.00425	-1.64273	-16.3523	0.269996		0.0442	0.772847	-0.754994	0.472835	-1.37276	0.00201548	2.15332	1.97051	-0.972776	-1.18915
0.04425	0.0425	-1.943	-0.40822	0.24996	-0.89269	-1.99515	-0.5687	1.57057	-0.26562		0.04425	-2.91585	6.55945	1.24084	2.97908	1.42382	3.03396	-2.51642	-16.3523	3.28111		0.04425	0.769792	-0.76447	0.466729	-1.36905	-0.0019881	2.15446	1.96556	-0.978958	-1.19235
0.0443	0.02667	-1.9212	-0.40543	0.22562	-0.86142	-1.99636	-0.57095	1.57779	-0.24476		0.0443	-0.794029	6.87148	-0.225712	1.2005	0.706145	4.31329	-1.75194	-16.8672	4.85687		0.0443	0.766655	-0.773925	0.460727	-1.36522	-0.00602868	2.15556	1.96051	-0.985197	-1.19544
0.04435	0.01081	-1.89931	-0.40217	0.20089	-0.83029	-1.9972	-0.57346	1.58477	-0.22376		0.04435	-1.57411	5.45174	2.03652	-0.188046	1.2678	3.75163	0.135856	-19.301	4.29522		0.04435	0.763436	-0.783356	0.454831	-1.36127	-0.0101088	2.15663	1.95536	-0.991491	-1.19843
0.0444	-0.00508	-1.87734	-0.39846	0.17576	-0.79932	-1.99767	-0.57624	1.5915	-0.20262		0.0444	-2.79104	3.50153	7.02905	-0.749705	3.04639	2.89354	1.63361	-18.5209	4.49804		0.0444	0.760135	-0.792759	0.449042	-1.35719	-0.0142303	2.15765	1.95012	-0.997841	-1.20131
0.04445	-0.02101	-1.85529	-0.3943	0.15026	-0.76852	-1.99776	-0.57927	1.59798	-0.18136		0.04445	-5.49012	4.59365	6.99784	-0.578087	1.57984	1.69222	1.94564	-14.3241	2.43862		0.04445	0.756755	-0.802132	0.443361	-1.35299	-0.0183944	2.15864	1.94479	-1.00425	-1.20408
0.0445	-0.03696	-1.83318	-0.38969	0.12437	-0.73791	-1.99748	-0.58257	1.6042	-0.15999		0.0445	-5.36531	7.38634	4.04913	-3.13675	-1.25966	0.615706	1.39959	-13.5284	1.39331		0.0445	0.753298	-0.811472	0.437789	-1.34867	-0.0226021	2.15958	1.93937	-1.01071	-1.20673
0.04455	-0.05295	-1.811	-0.38464	0.09811	-0.70749	-1.99683	-0.58613	1.61016	-0.13849		0.04455	-3.74274	8.10401	1.11603	-3.51119	-0.6824	2.12906	-0.457006	-15.3382	1.68974		0.04455	0.749761	-0.820779	0.432327	-1.34423	-0.0268551	2.16047	1.93386	-1.01723	-1.20928
0.0446	-0.06897	-1.78878	-0.37915	0.07147	-0.67727	-1.9958	-0.58996	1.61585	-0.11689		0.0446	-2.60382	6.57505	1.44366	-2.10705	-0.167546	2.28508	-3.17169	-14.8077	1.33091		0.0446	0.74615	-0.830045	0.426976	-1.33967	-0.0311546	2.16133	1.92825	-1.0238	-1.2117
0.04465	-0.08502	-1.76652	-0.37323	0.04447	-0.64727	-1.9944	-0.59404	1.62127	-0.09518		0.04465	-1.18407	2.87747	2.87901	-1.31136	-0.791611	2.12906	-5.82397	-15.2758	1.90817		0.04465	0.742464	-0.839272	0.421737	-1.33498	-0.0355023	2.16213	1.92256	-1.03043	-1.21402
0.0447	-0.10109	-1.74423	-0.36687	0.01711	-0.61749	-1.99262	-0.59838	1.6264	-0.07338		0.0447	-2.82224	2.08178	3.17544	-2.34107	3.23361	1.73902	-4.43542	-17.0856	2.65704		0.0447	0.738709	-0.848455	0.41661	-1.33018	-0.0398993	2.16289	1.91678	-1.03712	-1.21621
0.04475	-0.1172	-1.72191	-0.3601	-0.01061	-0.58795	-1.99047	-0.60298	1.63126	-0.05148		0.04475	-6.89427	3.92278	1.58408	-1.46738	3.98249	0.912137	-2.15758	-18.755	1.98617		0.04475	0.734883	-0.857594	0.411595	-1.32526	-0.0443462	2.16361	1.91092	-1.04385	-1.21829
0.0448	-0.13333	-1.69957	-0.35291	-0.03868	-0.55866	-1.98794	-0.60784	1.63582	-0.0295		0.0448	-6.31701	6.16941	0.226735	0.233198	1.89187	2.94035	-0.800242	-17.2416	3.03148		0.0448	0.730991	-0.866685	0.406693	-1.32023	-0.0488434	2.16427	1.90497	-1.05064	-1.22024
0.04485	-0.14949	-1.67722	-0.3453	-0.06711	-0.52962	-1.98504	-0.61296	1.64008	-0.00744		0.04485	-4.3512	7.57356	1.61528	1.2317	0.815357	6.99677	0.713116	-15.4318	4.99729		0.04485	0.727035	-0.875726	0.401904	-1.31507	-0.0533909	2.16489	1.89895	-1.05748	-1.22208
0.0449	-0.16568	-1.65488	-0.33729	-0.09587	-0.50086	-1.98177	-0.61833	1.64404	0.01469		0.0449	-4.41361	6.23182	3.05063	0.514027	0.690544	7.97967	2.92855	-14.0901	4.68526		0.0449	0.723015	-0.884715	0.397229	-1.3098	-0.0579892	2.16545	1.89285	-1.06436	-1.22379
0.04495	-0.18189	-1.63254	-0.32888	-0.12498	-0.47237	-1.97812	-0.62396	1.6477	0.03689		0.04495	-6.44182	4.54684	1.49047	1.29411	2.39112	5.40541	4.05186	-13.2008	5.91779		0.04495	0.718933	-0.89365	0.392667	-1.30441	-0.0626385	2.16597	1.88667	-1.07129	-1.22539
0.045	-0.19813	-1.61022	-0.32008	-0.15441	-0.44417	-1.97411	-0.62983	1.65105	0.05915		0.045	-6.59784	6.73107	-2.0043	1.84017	4.0605	3.92325	2.72573	-14.4957	4.48244		0.045	0.714794	-0.902529	0.388218	-1.2989	-0.0673395	2.16643	1.88043	-1.07827	-1.22686
0.04505	-0.21439	-1.58792	-0.31088	-0.18418	-0.41627	-1.96972	-0.63597	1.65408	0.08147		0.04505	-6.90987	7.54235	-2.9404	1.87137	3.23361	6.13868	1.68042	-15.7282	3.37472		0.04505	0.710596	-0.911349	0.38388	-1.29328	-0.0720928	2.16685	1.87411	-1.08529	-1.22821
0.0451	-0.23067	-1.56565	-0.30131	-0.21427	-0.38868	-1.96497	-0.64235	1.65679	0.10383		0.0451	-7.90837	6.88709	-1.42704	0.841661	4.71576	8.27611	0.354279	-14.2617	3.59314		0.0451	0.706342	-0.920108	0.379654	-1.28755	-0.0768987	2.16722	1.86773	-1.09235	-1.22943
0.04515	-0.24697	-1.54342	-0.29137	-0.24467	-0.3614	-1.95985	-0.64898	1.65917	0.12624		0.04515	-6.86306	5.76377	0.538768	-0.765307	5.12141	7.18399	-1.3463	-12.3271	4.48244		0.04515	0.702032	-0.928804	0.375538	-1.2817	-0.0817581	2.16753	1.86129	-1.09944	-1.23053
0.0452	-0.26329	-1.52124	-0.28105	-0.27539	-0.33445	-1.95436	-0.65586	1.66123	0.14869		0.0452	-5.78655	4.62485	1.05362	-2.27866	4.65336	5.57702	-2.20439	-12.2803	4.73206		0.0452	0.697666	-0.937435	0.371534	-1.27574	-0.0866723	2.16779	1.85477	-1.10657	-1.23151
0.04525	-0.27963	-1.49912	-0.27038	-0.30641	-0.30784	-1.94852	-0.66298	1.66295	0.17116		0.04525	-7.09709	5.40493	0.960012	-2.69991	3.21801	2.64392	-2.67244	-11.1258	3.67115		0.04525	0.693248	-0.946002	0.367643	-1.26968	-0.0916418	2.168	1.8482	-1.11374	-1.23235
0.0453	-0.29599	-1.47705	-0.25935	-0.33773	-0.28157	-1.94231	-0.67035	1.66434	0.19366		0.0453	-7.40912	5.38933	-0.522143	-3.94804	1.81386	1.31778	-0.800242	-9.48759	5.1377		0.0453	0.688779	-0.954499	0.363865	-1.2635	-0.0966668	2.16815	1.84156	-1.12094	-1.23307
0.04535	-0.31236	-1.45506	-0.24798	-0.36935	-0.25565	-1.93575	-0.67795	1.66538	0.21617		0.04535	-4.21079	3.96958	-0.97459	-4.88414	1.96988	1.33338	0.089051	-11.079	7.61836		0.04535	0.684261	-0.962928	0.360199	-1.25722	-0.101748	2.16824	1.83486	-1.12817	-1.23366
0.0454	-0.32874	-1.43315	-0.23627	-0.40125	-0.2301	-1.92883	-0.6858	1.66608	0.2387		0.0454	-2.79104	4.00078	-0.21011	-4.43169	2.89037	2.20707	-0.706632	-15.151	5.93339		0.0454	0.679696	-0.971288	0.356644	-1.25083	-0.106885	2.16828	1.82811	-1.13543	-1.23412
0.04545	-0.34514	-1.41132	-0.22424	-0.43344	-0.20492	-1.92156	-0.69389	1.66643	0.26123		0.04545	-5.47452	6.30983	1.86491	-1.90423	3.56124	3.11197	1.08756	-14.9326	5.60575		0.04545	0.675086	-0.979576	0.353199	-1.24434	-0.112077	2.16826	1.8213	-1.14271	-1.23445
0.0455	-0.36155	-1.38958	-0.21188	-0.4659	-0.18011	-1.91393	-0.70221	1.66642	0.28376		0.0455	-5.73975	7.44874	1.45926	-1.52979	5.23062	3.18997	3.459	-13.4192	6.40144		0.0455	0.670433	-0.98779	0.349864	-1.23774	-0.117327	2.16818	1.81443	-1.15002	-1.23465
0.04555	-0.37797	-1.36794	-0.19921	-0.49863	-0.1557	-1.90596	-0.71076	1.66606	0.30628		0.04555	-5.44331	5.0617	0.647979	-2.87153	4.71576	2.67512	4.28589	-14.0901	7.61836		0.04555	0.665739	-0.99593	0.346637	-1.23104	-0.122633	2.16804	1.8075	-1.15735	-1.23472
0.0456	-0.39439	-1.34641	-0.18623	-0.53162	-0.13167	-1.89765	-0.71955	1.66533	0.32879		0.0456	-3.71153	3.2051	-0.178907	-1.60779	3.46763	2.67512	3.84904	-14.6673	5.76177		0.0456	0.661007	-1.00399	0.343518	-1.22423	-0.127996	2.16784	1.80052	-1.1647	-1.23466
0.04565	-0.41082	-1.325	-0.17296	-0.56488	-0.10805	-1.889	-0.72856	1.66425	0.35127		0.04565	-2.80664	2.269	0.913207	-1.59219	2.2195	4.62532	2.67892	-14.0901	2.73505		0.04565	0.656239	-1.01198	0.340505	-1.21733	-0.133415	2.16758	1.7935	-1.17207	-1.23446
0.0457	-0.42725	-1.3037	-0.1594	-0.59838	-0.08484	-1.88001	-0.73779	1.6628	0.37373		0.0457	-3.86755	2.58104	2.39536	-3.87003	3.54564	6.59113	0.619506	-12.2803	1.90817		0.0457	0.651435	-1.01989	0.337599	-1.21032	-0.138889	2.16726	1.78642	-1.17946	-1.23412
0.04575	-0.44369	-1.28254	-0.14556	-0.63212	-0.06204	-1.87069	-0.74725	1.66097	0.39616		0.04575	-3.78954	4.06319	3.33146	-4.60331	3.34282	6.79395	-0.862648	-10.7825	2.64144		0.04575	0.646599	-1.02772	0.334797	-1.20321	-0.144419	2.16687	1.7793	-1.18685	-1.23365
0.0458	-0.46012	-1.26151	-0.13145	-0.6661	-0.03967	-1.86104	-0.75694	1.65878	0.41855		0.0458	-2.401	3.42352	2.39536	-3.96364	2.64075	4.48491	-1.50232	-10.2677	5.1221		0.0458	0.641732	-1.03547	0.332099	-1.196	-0.150005	2.16642	1.77213	-1.19426	-1.23305
0.04585	-0.47655	-1.24062	-0.11708	-0.70031	-0.01773	-1.85107	-0.76683	1.65621	0.44089		0.04585	-3.11867	2.93987	1.10043	-4.32248	2.73436	1.91064	-0.222982	-10.7045	6.41704		0.04585	0.636835	-1.04314	0.329504	-1.18869	-0.155646	2.16589	1.76492	-1.20168	-1.2323
0.0459	-0.49297	-1.21988	-0.10246	-0.73474	0.00378	-1.84078	-0.77694	1.65326	0.46317		0.0459	-3.63353	8.36924	-0.678159	-5.92945	2.73436	1.05255	0.619506	-12.5767	5.18451		0.0459	0.631912	-1.05072	0.32701	-1.18128	-0.161343	2.1653	1.75767	-1.2091	-1.23141
0.04595	-0.50939	-1.19929	-0.08759	-0.76938	0.02484	-1.83017	-0.78727	1.64993	0.4854		0.04595	-3.10307	11.396	-0.163305	-4.32248	1.82946	0.132055	1.22797	-12.2647	2.93787		0.04595	0.626964	-1.05821	0.324616	-1.17379	-0.167095	2.16463	1.75037	-1.21652	-1.23038
0.046	-0.5258	-1.17887	-0.0725	-0.80424	0.04546	-1.81925	-0.7978	1.64622	0.50757		0.046	-2.21378	9.46136	2.66059	-4.01045	2.87477	1.31778	0.510295	-10.6109	2.04858		0.046	0.621994	-1.06562	0.322321	-1.16619	-0.172901	2.1639	1.74303	-1.22394	-1.22922
0.04605	-0.54219	-1.15861	-0.05718	-0.8393	0.06562	-1.80802	-0.80853	1.64213	0.52966		0.04605	-3.19668	6.46584	3.36266	-4.26007	3.95128	2.70632	-1.53352	-11.625	4.35762		0.04605	0.617002	-1.07295	0.320125	-1.15851	-0.178763	2.16309	1.73565	-1.23136	-1.2279
0.0461	-0.55857	-1.13853	-0.04164	-0.87454	0.08532	-1.7965	-0.81947	1.63765	0.55167		0.0461	-3.07187	3.82917	0.632378	-4.66571	5.44904	3.36159	-1.43991	-12.2647	5.93339		0.0461	0.611989	-1.08018	0.31803	-1.15073	-0.184678	2.16221	1.72823	-1.23876	-1.22645
0.04615	-0.57494	-1.11862	-0.0259	-0.90998	0.10456	-1.78467	-0.8306	1.63278	0.5736		0.04615	-2.97826	2.78386	1.08482	-4.16646	3.70166	1.83263	0.494693	-11.4378	6.0426		0.04615	0.606958	-1.08732	0.316034	-1.14286	-0.190647	2.16127	1.72078	-1.24616	-1.22486
0.0462	-0.59128	-1.0989	-0.00997	-0.94559	0.12333	-1.77256	-0.84193	1.62752	0.59544		0.0462	-5.80215	2.269	1.8493	-4.11966	3.20241	2.06666	1.5556	-11.2974	7.61836		0.0462	0.601909	-1.09437	0.314138	-1.13491	-0.196669	2.16025	1.71328	-1.25354	-1.22311
0.04625	-0.6076	-1.07937	0.00615	-0.98138	0.14162	-1.76016	-0.85344	1.62187	0.61719		0.04625	-7.98638	1.19249	2.17694	-5.18057	3.1556	2.20707	2.4605	-12.8107	8.30483		0.04625	0.596843	-1.10132	0.312342	-1.12687	-0.202744	2.15916	1.70576	-1.26091	-1.22123
0.0463	-0.62389	-1.06004	0.02244	-1.01733	0.15944	-1.74748	-0.86515	1.61582	0.63883		0.0463	-6.75385	0.584028	2.7698	-5.82023	3.71726	2.4879	2.77253	-12.4675	8.39844		0.0463	0.591764	-1.10818	0.310646	-1.11875	-0.208871	2.15801	1.6982	-1.26825	-1.2192
0.04635	-0.64016	-1.04091	0.0389	-1.05343	0.17677	-1.73452	-0.87703	1.60938	0.66036		0.04635	-3.69593	1.53573	3.30026	-3.12115	3.93568	3.53321	0.619506	-11.5002	7.69637		0.04635	0.586672	-1.11493	0.309049	-1.11055	-0.215049	2.15679	1.69061	-1.27557	-1.21703
0.0464	-0.65639	-1.02198	0.05551	-1.08969	0.19361	-1.7213	-0.8891	1.60255	0.68178		0.0464	-3.4307	3.23631	2.55138	-1.87302	4.76257	3.18997	-3.76455	-9.09755	6.76027		0.0464	0.581569	-1.12158	0.30755	-1.10227	-0.221277	2.15549	1.68299	-1.28286	-1.21471
0.04645	-0.67259	-1.00327	0.07226	-1.12608	0.20996	-1.70781	-0.90134	1.59532	0.70308		0.04645	-4.17958	3.1427	2.7854	-1.93543	4.23211	2.94035	-5.1843	-6.72611	4.82567		0.04645	0.576455	-1.12813	0.306149	-1.09391	-0.227554	2.15413	1.67534	-1.29012	-1.21225
0.0465	-0.68875	-0.98478	0.08915	-1.16261	0.22582	-1.69407	-0.91375	1.5877	0.72426		0.0465	-2.93145	4.73406	3.7527	-3.5736	2.93718	2.4879	-1.76754	-6.52328	0.348004		0.0465	0.571334	-1.13457	0.304844	-1.08548	-0.233881	2.15269	1.66766	-1.29735	-1.20964
0.04655	-0.70487	-0.9665	0.10616	-1.19926	0.24118	-1.68008	-0.92633	1.57967	0.74529		0.04655	-2.32299	6.41904	3.59669	-4.65011	2.50033	1.61421	1.54	-5.04113	-1.89863		0.04655	0.566206	-1.14091	0.303634	-1.07698	-0.240257	2.1512	1.65996	-1.30454	-1.2069
0.0466	-0.72094	-0.94846	0.12328	-1.23602	0.25603	-1.66584	-0.93907	1.57125	0.7662		0.0466	-2.21378	5.54535	3.51868	-5.75783	2.1727	-0.741636	1.80523	-4.49507	-1.91423		0.0466	0.561073	-1.14714	0.302519	-1.06842	-0.246683	2.14963	1.65224	-1.3117	-1.20401
0.04665	-0.73697	-0.93064	0.14051	-1.2729	0.27039	-1.65137	-0.95197	1.56243	0.78695		0.04665	-2.83784	5.15531	2.92582	-6.17907	2.1415	-1.61533	-0.550616	-4.12063	-2.25747		0.04665	0.555938	-1.15325	0.3015	-1.05979	-0.253158	2.148	1.6445	-1.31882	-1.20097
0.0467	-0.75294	-0.91306	0.15783	-1.30987	0.28423	-1.63666	-0.96502	1.55321	0.80756		0.0467	-3.97676	4.85887	1.55287	-6.84994	3.49884	-0.944457	-2.3292	-4.24545	-1.22776		0.0467	0.550803	-1.15926	0.300575	-1.0511	-0.259682	2.14631	1.63674	-1.32589	-1.1978
0.04675	-0.76886	-0.89572	0.17522	-1.34694	0.29757	-1.62173	-0.97822	1.5436	0.82801		0.04675	-4.08597	4.54684	1.25644	-7.55202	3.35842	1.70782	-3.17169	-5.32196	-0.0264354		0.04675	0.545669	-1.16516	0.299746	-1.04234	-0.266256	2.14455	1.62895	-1.33292	-1.19449
0.0468	-0.78473	-0.87862	0.19269	-1.38409	0.3104	-1.60658	-0.99156	1.53358	0.8483		0.0468	-2.86905	3.23631	1.64648	-10.7503	2.95278	3.90765	-3.70214	-6.74171	-0.447679		0.0468	0.54054	-1.17094	0.299013	-1.03353	-0.272879	2.14272	1.62115	-1.3399	-1.19103
0.04685	-0.80053	-0.86177	0.21022	-1.42131	0.32272	-1.59122	-1.00505	1.52317	0.86843		0.04685	-1.96415	3.81357	-0.194509	-14.3543	3.84207	2.86234	-2.70364	-8.89473	-0.478883		0.04685	0.535417	-1.17662	0.298375	-1.02466	-0.279552	2.14083	1.61333	-1.34683	-1.18744
0.0469	-0.81626	-0.84516	0.2278	-1.4586	0.33452	-1.57566	-1.01867	1.51236	0.88838		0.0469	-2.02656	3.25191	-2.0511	-14.7132	2.2351	2.26948	-2.59443	-9.30037	2.00178		0.0469	0.530302	-1.18218	0.297835	-1.01574	-0.286275	2.13887	1.6055	-1.35371	-1.18371
0.04695	-0.83193	-0.82882	0.24542	-1.49595	0.34581	-1.5599	-1.03241	1.50115	0.90815		0.04695	-2.29179	1.39531	-1.25542	-12.8566	0.986975	3.92325	-1.92356	-8.17706	1.97057		0.04695	0.525196	-1.18763	0.29739	-1.00676	-0.29305	2.13685	1.59765	-1.36055	-1.17984
0.047	-0.84752	-0.81273	0.26306	-1.53335	0.35658	-1.54395	-1.04629	1.48955	0.92774		0.047	-2.27618	-0.430078	1.45926	-9.54902	0.316105	5.42101	-1.78314	-7.91183	1.20609		0.047	0.520102	-1.19296	0.297042	-0.997745	-0.299875	2.13477	1.58979	-1.36733	-1.17583
0.04705	-0.86304	-0.7969	0.28072	-1.57079	0.36684	-1.52782	-1.06028	1.47756	0.94714		0.04705	-2.97826	0.818053	1.88051	-8.22289	-0.463977	4.3913	-1.58032	-5.6808	2.40742		0.04705	0.515022	-1.19818	0.296789	-0.988679	-0.306749	2.13262	1.58192	-1.37406	-1.17168
0.0471	-0.87848	-0.78133	0.29839	-1.60826	0.37658	-1.51152	-1.07438	1.46516	0.96635		0.0471	-2.19818	3.65755	1.44366	-6.60032	-0.0427329	2.94035	-1.59592	-2.8257	-0.868923		0.0471	0.509958	-1.20328	0.296631	-0.979575	-0.313672	2.13042	1.57403	-1.38073	-1.1674
0.04715	-0.89383	-0.76603	0.31605	-1.64576	0.3858	-1.49505	-1.0886	1.45238	0.98536		0.04715	-1.99535	2.98668	1.89611	-5.99185	-0.49518	1.31778	-1.95476	-3.8086	-4.23888		0.04715	0.504911	-1.20826	0.296568	-0.970433	-0.320644	2.12814	1.56614	-1.38735	-1.16297
0.0472	-0.90909	-0.751	0.3337	-1.68327	0.3945	-1.47841	-1.10292	1.43921	1.00417		0.0472	-2.3854	3.06469	3.44067	-7.81724	-0.432774	1.25537	-2.73484	-6.11764	-5.01896		0.0472	0.499885	-1.21312	0.296599	-0.961253	-0.327664	2.12581	1.55823	-1.39391	-1.15842
0.04725	-0.92426	-0.73623	0.35132	-1.72079	0.40269	-1.46163	-1.11733	1.42564	1.02276		0.04725	-3.74274	3.36112	3.11304	-11.9673	-0.619993	2.20707	-2.98447	-8.42668	-3.80203		0.04725	0.494879	-1.21786	0.296724	-0.952042	-0.334733	2.12342	1.55031	-1.40042	-1.15373
0.0473	-0.93933	-0.72175	0.3689	-1.75831	0.41036	-1.4447	-1.13185	1.41169	1.04114		0.0473	-4.22639	3.37672	2.801	-13.9487	-1.79012	4.07927	-1.15908	-7.78702	-0.572492		0.0473	0.489898	-1.22248	0.296945	-0.942798	-0.341851	2.12096	1.54239	-1.40687	-1.14891
0.04735	-0.9543	-0.70753	0.38644	-1.79581	0.41752	-1.42764	-1.14644	1.39735	1.0593		0.04735	-4.95966	3.04909	5.11005	-13.543	-1.6029	2.28508	-0.441404	-7.6466	1.90817		0.04735	0.484942	-1.22697	0.297259	-0.933529	-0.349016	2.11844	1.53447	-1.41325	-1.14396
0.0474	-0.96917	-0.6936	0.40392	-1.8333	0.42416	-1.41044	-1.16112	1.38263	1.07724		0.0474	-3.63353	1.50452	7.27867	-13.6054	-0.0271312	1.08375	0.869132	-5.83681	1.89256		0.0474	0.480015	-1.23134	0.297669	-0.924229	-0.356229	2.11586	1.52653	-1.41958	-1.13888
0.04745	-0.98392	-0.67994	0.42133	-1.87076	0.43029	-1.39313	-1.17588	1.36753	1.09495		0.04745	-3.00946	1.91017	7.71552	-12.5601	-0.354765	1.67662	-0.238583	-3.65258	1.70535		0.04745	0.475118	-1.23557	0.298172	-0.914905	-0.363488	2.11323	1.5186	-1.42584	-1.13367
0.0475	-0.99856	-0.66656	0.43866	-1.90818	0.43591	-1.3757	-1.1907	1.35205	1.11243		0.0475	-3.4151	2.98668	6.37378	-12.1077	-1.94613	0.0696488	-2.14198	-2.37325	2.50103		0.0475	0.470253	-1.23969	0.298768	-0.905556	-0.370793	2.11053	1.51066	-1.43203	-1.12833
0.04755	-1.01309	-0.65347	0.4559	-1.94555	0.44102	-1.35817	-1.20559	1.33619	1.12967		0.04755	-6.20779	3.2051	4.06474	-10.4071	-3.38148	-1.97416	-2.79725	-1.8428	3.49953		0.04755	0.46542	-1.24367	0.299456	-0.896185	-0.378143	2.10778	1.50272	-1.43816	-1.12287
0.0476	-1.02749	-0.64066	0.47304	-1.98287	0.44562	-1.34054	-1.22054	1.31995	1.14667		0.0476	-7.1751	4.71846	0.850801	-8.76894	-3.66231	0.600104	-2.01717	-0.111015	3.39032		0.0476	0.460623	-1.24752	0.300235	-0.886792	-0.385538	2.10496	1.49478	-1.44422	-1.11727
0.04765	-1.04176	-0.62813	0.49007	-2.02012	0.44972	-1.32282	-1.23554	1.30334	1.16342		0.04765	-4.77244	3.53274	1.16283	-5.16497	-3.72472	1.94184	0.151457	0.778278	1.09688		0.04765	0.455861	-1.25124	0.301104	-0.877379	-0.392977	2.10209	1.48684	-1.45021	-1.11155
0.0477	-1.0559	-0.61588	0.50697	-2.0573	0.45332	-1.30503	-1.25059	1.28637	1.17992		0.0477	-4.95966	2.67465	3.95552	-2.85592	-4.59841	2.16027	1.68042	-1.48396	1.01887		0.0477	0.451137	-1.25484	0.302061	-0.86795	-0.400459	2.09916	1.47892	-1.45612	-1.10571
0.04775	-1.06991	-0.60392	0.52375	-2.0944	0.45641	-1.28716	-1.26568	1.26903	1.19617		0.04775	-8.32962	2.67465	4.84482	-3.94804	-3.91194	2.20707	1.86764	-2.43566	2.53223		0.04775	0.446454	-1.25831	0.303105	-0.858502	-0.407984	2.09618	1.47099	-1.46196	-1.09975
0.0478	-1.08377	-0.59224	0.54038	-2.13141	0.45901	-1.26922	-1.28081	1.25132	1.21215		0.0478	-9.56214	2.12859	4.32996	-4.4941	-2.99144	2.5191	0.775523	-1.56197	1.64294		0.0478	0.441814	-1.26165	0.304234	-0.849042	-0.415552	2.09314	1.46308	-1.46773	-1.09367
0.04785	-1.09749	-0.58085	0.55686	-2.16832	0.46112	-1.25123	-1.29596	1.23326	1.22788		0.04785	-7.2375	1.44212	2.92582	-3.83883	-2.94464	4.45371	0.323075	0.825083	0.940866		0.04785	0.43722	-1.26485	0.305449	-0.83957	-0.423163	2.09005	1.45518	-1.47342	-1.08747
0.0479	-1.11105	-0.56975	0.57318	-2.20512	0.46273	-1.2332	-1.31113	1.21484	1.24334		0.0479	-7.06588	0.864858	2.30175	-2.85592	-2.11775	7.52723	-0.753437	2.54126	0.909662		0.0479	0.432673	-1.26793	0.306747	-0.830088	-0.430817	2.08691	1.44729	-1.47904	-1.08115
0.04795	-1.12446	-0.55893	0.58933	-2.2418	0.46386	-1.21512	-1.32632	1.19607	1.25852		0.04795	-9.06289	2.64344	2.06773	-4.60331	0.144487	5.57702	-0.87825	0.450644	3.1875		0.04795	0.428175	-1.27089	0.308127	-0.820598	-0.438513	2.08371	1.43941	-1.48458	-1.07472
0.048	-1.13772	-0.54839	0.60529	-2.27835	0.46451	-1.19701	-1.34152	1.17695	1.27344		0.048	-11.0911	3.81357	1.28765	-6.78754	0.643739	1.4894	0.354279	-1.78039	2.43862		0.048	0.423729	-1.27371	0.30959	-0.811102	-0.446252	2.08046	1.43155	-1.49005	-1.06817
0.04805	-1.1508	-0.53814	0.62107	-2.31477	0.46468	-1.17888	-1.35672	1.15749	1.28808		0.04805	-12.3236	4.01639	2.36416	-4.68132	0.768552	-1.3969	-1.08107	-4.94752	2.29821		0.04805	0.419332	-1.27639	0.311133	-0.8016	-0.454032	2.07716	1.4237	-1.49543	-1.06151
0.0481	-1.16372	-0.52817	0.63664	-2.35105	0.46438	-1.16074	-1.37192	1.13768	1.30243		0.0481	-12.8229	2.44062	2.34856	-2.93393	1.01818	-2.37981	-2.26679	-5.25955	3.63995		0.0481	0.414989	-1.27895	0.312757	-0.792095	-0.461852	2.0738	1.41587	-1.50074	-1.05475
0.04815	-1.17647	-0.51849	0.65199	-2.38717	0.46361	-1.14258	-1.38711	1.11754	1.3165		0.04815	-11.4187	0.989671	0.46076	-2.69991	-0.666798	-2.83225	-0.0981686	-5.05673	3.70235		0.04815	0.410699	-1.28137	0.31446	-0.782588	-0.469712	2.07039	1.40807	-1.50597	-1.04787
0.0482	-1.18903	-0.50908	0.66713	-2.42312	0.46237	-1.12444	-1.40228	1.09707	1.33029		0.0482	-10.2954	-0.0868418	1.30325	-1.76381	0.00407203	-1.11608	3.61502	-2.71649	1.75215		0.0482	0.406464	-1.28367	0.316242	-0.77308	-0.477613	2.06693	1.40028	-1.51112	-1.0409
0.04825	-1.20142	-0.49996	0.68204	-2.45891	0.46068	-1.1063	-1.41743	1.07626	1.34378		0.04825	-9.42173	0.615232	1.28765	-0.437672	-0.0583345	-1.28769	2.66332	-1.37475	2.01738		0.04825	0.402285	-1.28583	0.318103	-0.763573	-0.485553	2.06341	1.39252	-1.51619	-1.03382
0.0483	-1.21361	-0.49111	0.6967	-2.49452	0.45853	-1.08818	-1.43255	1.05514	1.35698		0.0483	-8.70406	0.989671	2.23935	-0.266055	-2.02414	-0.928855	-0.847047	0.653465	5.66816		0.0483	0.398166	-1.28786	0.320042	-0.75407	-0.493535	2.05984	1.38479	-1.52117	-1.02664
0.04835	-1.22561	-0.48254	0.71112	-2.52993	0.45593	-1.07008	-1.44763	1.03369	1.36989		0.04835	-6.67584	0.490418	2.67619	-1.45178	-1.04124	1.61421	-2.68804	0.435042	7.24392		0.04835	0.394106	-1.28976	0.322056	-0.744571	-0.501558	2.05621	1.37708	-1.52605	-1.01936
0.0484	-1.23741	-0.47425	0.72528	-2.56515	0.45289	-1.05202	-1.46267	1.01193	1.38249		0.0484	-6.03618	1.03648	2.70739	-3.26157	-2.30497	4.84375	-1.29949	-1.07832	6.85388		0.0484	0.390109	-1.29153	0.324145	-0.735079	-0.509622	2.05253	1.3694	-1.53086	-1.01198
0.04845	-1.24901	-0.46622	0.73917	-2.60017	0.44942	-1.03401	-1.47766	0.98986	1.3948		0.04845	-8.86007	0.911662	3.11304	-2.10705	-2.92903	5.67063	0.0110428	-1.12512	4.46683		0.04845	0.386176	-1.29318	0.326306	-0.725593	-0.517727	2.0488	1.36175	-1.53557	-1.00451
0.0485	-1.26041	-0.45847	0.75278	-2.63496	0.44551	-1.01604	-1.4926	0.96749	1.4068		0.0485	-11.0599	0.0691745	1.39686	-1.6702	-1.99294	4.29769	0.151457	-0.0174052	1.33091		0.0485	0.382307	-1.29469	0.32854	-0.716113	-0.525874	2.04501	1.35412	-1.5402	-0.996939
0.04855	-1.27159	-0.45099	0.76611	-2.66953	0.44118	-0.99814	-1.50747	0.94481	1.41849		0.04855	-11.918	-1.38178	1.39686	-3.63601	-3.13186	2.00425	0.089051	-0.532259	0.269996		0.04855	0.378506	-1.29607	0.330841	-0.706641	-0.53406	2.04116	1.34653	-1.54473	-0.989275
0.0486	-1.28255	-0.44378	0.77915	-2.70387	0.43643	-0.9803	-1.52227	0.92185	1.42988		0.0486	-10.0146	0.0535729	1.52167	-4.60331	-3.94314	0.506494	-0.3946	0.450644	0.940866		0.0486	0.374773	-1.29732	0.33321	-0.69718	-0.542289	2.03726	1.33897	-1.54917	-0.981519
0.04865	-1.29329	-0.43683	0.79188	-2.73797	0.43128	-0.96254	-1.53699	0.89859	1.44095		0.04865	-8.95368	2.14419	3.14424	-2.20066	-5.53451	0.84973	-1.89236	0.981099	1.45572		0.04865	0.371109	-1.29844	0.335644	-0.687727	-0.550558	2.0333	1.33145	-1.55352	-0.973674
0.0487	-1.30381	-0.43014	0.8043	-2.77181	0.42571	-0.94486	-1.55163	0.87505	1.45171		0.0487	-10.9195	1.55133	6.70141	-0.546884	-5.79973	0.834129	-2.85966	-2.31084	-0.946932		0.0487	0.367516	-1.29942	0.338141	-0.678285	-0.55887	2.02929	1.32397	-1.55777	-0.965743
0.04875	-1.31409	-0.4237	0.81641	-2.8054	0.41975	-0.92727	-1.56619	0.85123	1.46215		0.04875	-10.9351	1.64494	6.24896	-2.68431	-2.78862	-0.0395626	-0.659827	-3.43416	-2.10145		0.04875	0.363995	-1.30027	0.340701	-0.668855	-0.567225	2.02522	1.31652	-1.56192	-0.957726
0.0488	-1.32414	-0.41752	0.82818	-2.83872	0.4134	-0.90979	-1.58064	0.82714	1.47228		0.0488	-10.2798	0.552825	5.17245	-5.39899	-1.15045	0.522096	-0.238583	-2.54487	-1.94544		0.0488	0.360547	-1.301	0.343321	-0.659438	-0.575621	2.0211	1.30911	-1.56597	-0.949627
0.04885	-1.33395	-0.4116	0.83963	-2.87176	0.40667	-0.8924	-1.59499	0.80278	1.48209		0.04885	-9.40613	-1.33497	3.79951	-5.10256	0.284901	1.61421	-2.45401	-1.9208	-2.33548		0.04885	0.357171	-1.3016	0.345998	-0.650033	-0.584057	2.01691	1.30174	-1.56993	-0.941444
0.0489	-1.34351	-0.40592	0.85073	-2.90452	0.39956	-0.87514	-1.60923	0.77816	1.49158		0.0489	-7.98638	-1.67821	2.84781	-3.08995	1.51743	1.94184	-4.04538	-2.49806	-1.35257		0.0489	0.353871	-1.30207	0.34873	-0.640642	-0.592534	2.01267	1.29441	-1.57378	-0.93318
0.04895	-1.35282	-0.40048	0.86148	-2.93698	0.39208	-0.85799	-1.62335	0.75328	1.50075		0.04895	-7.31551	-0.180452	2.31735	-3.93244	-0.292359	0.475291	-5.43393	-3.74619	-0.603696		0.04895	0.350647	-1.30242	0.351512	-0.631267	-0.601049	2.00837	1.28712	-1.57753	-0.924836
0.049	-1.36188	-0.39529	0.87187	-2.96915	0.38424	-0.84098	-1.63735	0.72815	1.50959		0.049	-6.64464	0.568427	3.30026	-5.88264	-3.10065	1.69222	-3.99858	-0.859893	-0.915728		0.049	0.347498	-1.30264	0.354342	-0.621906	-0.609604	2.00402	1.27987	-1.58117	-0.916415
0.04905	-1.37068	-0.39033	0.88191	-3.001	0.37605	-0.8241	-1.65122	0.70278	1.51811		0.04905	-6.3014	0.864858	4.26756	-3.90123	-5.34729	3.65802	-1.64273	0.981099	-0.541289		0.04905	0.344426	-1.30273	0.357216	-0.612565	-0.618194	1.9996	1.27268	-1.58471	-0.907916
0.0491	-1.37921	-0.38561	0.89157	-3.03253	0.36751	-0.80736	-1.66494	0.67717	1.52631		0.0491	-5.73975	1.2549	2.58258	-1.49858	-5.55011	5.57702	-1.73634	1.55836	-1.6178		0.0491	0.341431	-1.3027	0.360131	-0.603243	-0.626821	1.99513	1.26552	-1.58816	-0.899345
0.04915	-1.38748	-0.38111	0.90085	-3.06374	0.35864	-0.79078	-1.67853	0.65133	1.53417		0.04915	-5.08448	0.350004	2.22374	-1.77941	-5.70612	5.82665	-3.21849	3.14973	-3.88004		0.04915	0.338514	-1.30255	0.363085	-0.593945	-0.635484	1.99061	1.25842	-1.5915	-0.8907
0.0492	-1.39547	-0.37684	0.90975	-3.09462	0.34944	-0.77436	-1.69196	0.62527	1.54171		0.0492	-5.44331	0.225191	3.34706	-1.93543	-4.59841	6.06067	-2.3448	1.30873	-4.76933		0.0492	0.335674	-1.30228	0.366075	-0.584671	-0.644181	1.98603	1.25137	-1.59474	-0.881984
0.04925	-1.40319	-0.37279	0.91825	-3.12515	0.33992	-0.7581	-1.70523	0.59899	1.54893		0.04925	-7.75236	1.56693	4.78241	-0.671697	-3.42829	4.25089	-1.00306	-1.46836	-3.61481		0.04925	0.332911	-1.30188	0.369098	-0.575425	-0.65291	1.9814	1.24437	-1.59787	-0.8732
0.0493	-1.41063	-0.36895	0.92636	-3.15533	0.33009	-0.74201	-1.71834	0.57249	1.55581		0.0493	-8.84447	2.09739	6.06174	-2.09145	-2.66381	3.01836	-2.06397	-0.469852	-2.14826		0.0493	0.330227	-1.30136	0.37215	-0.566207	-0.66167	1.9767	1.23743	-1.60091	-0.86435
0.04935	-1.41778	-0.36533	0.93407	-3.18515	0.31996	-0.72611	-1.73128	0.54579	1.56236		0.04935	-7.54953	0.911662	6.13975	-1.88862	-2.78862	5.62383	-2.87526	2.26043	1.08128		0.04935	0.327621	-1.30073	0.375231	-0.557023	-0.67046	1.97196	1.23054	-1.60384	-0.855436
0.0494	-1.42464	-0.36191	0.94137	-3.21461	0.30953	-0.71039	-1.74404	0.51889	1.56859		0.0494	-7.64314	-0.414476	4.93843	0.186393	-1.91493	8.40092	-0.97186	3.64898	2.14219		0.0494	0.325094	-1.29998	0.378337	-0.54787	-0.679278	1.96715	1.2237	-1.60667	-0.846458
0.04945	-1.4312	-0.3587	0.94825	-3.24369	0.29882	-0.69486	-1.75661	0.49179	1.57448		0.04945	-9.82737	-0.227256	4.642	0.841661	-2.47659	7.65204	-1.3463	2.27603	1.11248		0.04945	0.322645	-1.29911	0.381464	-0.538753	-0.688125	1.96229	1.21693	-1.60939	-0.837421
0.0495	-1.43747	-0.35568	0.95471	-3.27239	0.28783	-0.67953	-1.76899	0.46451	1.58004		0.0495	-11.684	0.396809	3.87752	2.29261	-3.74032	4.96856	-3.18729	0.996701	1.2685		0.0495	0.320274	-1.29813	0.38461	-0.52967	-0.696998	1.95738	1.21022	-1.612	-0.828324
0.04955	-1.44344	-0.35285	0.96075	-3.30071	0.27658	-0.66441	-1.78118	0.43705	1.58527		0.04955	-11.4187	-0.632899	4.00233	2.65145	-4.41119	4.71893	-3.79575	-1.46836	2.56344		0.04955	0.317979	-1.29703	0.387773	-0.520626	-0.705898	1.95241	1.20358	-1.61451	-0.819168
0.0496	-1.4491	-0.3502	0.96636	-3.32862	0.26507	-0.6495	-1.79315	0.40942	1.59017		0.0496	-9.62455	-0.820118	3.62789	-0.546884	-4.44239	6.18549	-3.34331	-4.08943	0.769248		0.0496	0.31576	-1.29583	0.39095	-0.511618	-0.714823	1.94738	1.19699	-1.61691	-0.809956
0.04965	-1.45445	-0.34774	0.97153	-3.35613	0.25331	-0.63481	-1.80492	0.38162	1.59474		0.04965	-8.28281	-0.00883364	3.50308	0.295604	-3.50629	6.41951	-4.13899	-4.85391	-0.822118		0.04965	0.313617	-1.29451	0.394138	-0.50265	-0.72377	1.94229	1.19047	-1.6192	-0.80069
0.0497	-1.45948	-0.34545	0.97627	-3.38323	0.24131	-0.62035	-1.81647	0.35366	1.59899		0.0497	-8.67285	0.178386	2.58258	3.29112	-2.08655	5.76424	-2.26679	-3.43416	0.269996		0.0497	0.31155	-1.29309	0.397334	-0.493726	-0.73274	1.93715	1.18402	-1.62139	-0.79137
0.04975	-1.4642	-0.34334	0.98055	-3.40992	0.22908	-0.60611	-1.82779	0.32555	1.6029		0.04975	-6.58223	1.64494	-1.0994	2.66705	-1.88373	4.04806	-1.67393	-1.01591	2.32941		0.04975	0.309559	-1.29156	0.400535	-0.484845	-0.741729	1.93195	1.17764	-1.62347	-0.781995
0.0498	-1.4686	-0.34139	0.98439	-3.43617	0.21663	-0.59211	-1.83888	0.2973	1.60648		0.0498	-6.66024	2.11299	-3.78288	0.794856	-3.10065	5.63943	-3.46812	1.40234	1.97057		0.0498	0.307642	-1.28993	0.403738	-0.476009	-0.750737	1.92669	1.17133	-1.62544	-0.772569
0.04985	-1.47267	-0.33959	0.98778	-3.462	0.20397	-0.57835	-1.84974	0.26891	1.60973		0.04985	-9.1097	2.12859	-1.17741	1.54373	-6.4238	7.91727	-3.67094	1.09031	1.61174		0.04985	0.305799	-1.28819	0.406941	-0.46722	-0.759762	1.92137	1.16509	-1.6273	-0.763093
0.0499	-1.47642	-0.33795	0.99071	-3.48738	0.19111	-0.56483	-1.86035	0.24038	1.61265		0.0499	-9.53094	1.05208	0.148727	3.75917	-8.18678	8.44772	-0.831445	0.357034	0.69124		0.0499	0.304027	-1.28635	0.41014	-0.458479	-0.768803	1.91598	1.15893	-1.62906	-0.753568
0.04995	-1.47983	-0.33646	0.99318	-3.51232	0.17805	-0.55157	-1.87071	0.21173	1.61525		0.04995	-9.60895	0.443614	0.491963	5.10091	-7.4067	9.04059	0.198262	2.77529	-0.790915		0.04995	0.302327	-1.28442	0.413333	-0.449788	-0.777858	1.91054	1.15284	-1.63071	-0.743996
0.05	-1.48291	-0.33511	0.99519	-3.53681	0.16482	-0.53857	-1.88082	0.18297	1.61752		0.05	-10.1238	1.3173	0.320345	4.1024	-8.21799	8.49453	-0.254185	5.13113	0.363605		0.05	0.300698	-1.28238	0.416516	-0.441147	-0.786927	1.90504	1.14684	-1.63225	-0.734377
0.05005	-1.48565	-0.33389	0.99673	-3.56084	0.15141	-0.52583	-1.89066	0.15409	1.61946		0.05005	-9.54654	1.41091	0.882004	2.99469	-7.14147	7.07478	-1.00306	4.28864	2.73505		0.05005	0.299138	-1.28024	0.419687	-0.432559	-0.796008	1.89947	1.14092	-1.63368	-0.724713
0.0501	-1.48805	-0.33281	0.9978	-3.5844	0.13784	-0.51335	-1.90023	0.12511	1.62108		0.0501	-9.65575	-1.08535	1.11603	4.38323	-7.21948	5.74864	0.46349	1.71438	4.51364		0.0501	0.297647	-1.278	0.422845	-0.424022	-0.8051	1.89385	1.13508	-1.63501	-0.715008
0.05015	-1.49011	-0.33185	0.9984	-3.60749	0.12412	-0.50115	-1.90953	0.09604	1.62238		0.05015	-9.64015	-3.80003	2.7386	5.24132	-6.36139	4.67213	2.66332	0.965497	5.02849		0.05015	0.296223	-1.27566	0.425985	-0.415539	-0.814203	1.88818	1.12932	-1.63623	-0.70526
0.0502	-1.49182	-0.331	0.99853	-3.6301	0.11025	-0.48922	-1.91856	0.06687	1.62335		0.0502	-8.2204	-2.00584	5.48448	5.49095	-6.3926	4.4381	2.4917	-0.407446	2.09539		0.0502	0.294866	-1.27322	0.429107	-0.40711	-0.823314	1.88244	1.12365	-1.63734	-0.695474
0.05025	-1.49318	-0.33027	0.99818	-3.65223	0.09625	-0.47757	-1.92729	0.03763	1.624		0.05025	-7.68995	1.45772	5.6561	3.60315	-6.12737	4.70333	1.30598	-1.17193	2.07978		0.05025	0.293575	-1.27069	0.432208	-0.398736	-0.832433	1.87665	1.11807	-1.63835	-0.68565
0.0503	-1.49419	-0.32964	0.99735	-3.67387	0.08212	-0.46621	-1.93573	0.00831	1.62434		0.0503	-5.97377	2.84626	2.30175	2.51104	-6.73583	4.73454	2.4293	0.60666	4.60725		0.0503	0.29235	-1.26805	0.435284	-0.390423	-0.841558	1.87081	1.11258	-1.63925	-0.67579
0.05035	-1.49484	-0.32911	0.99604	-3.69501	0.06789	-0.45513	-1.94388	-0.02107	1.62435		0.05035	-5.78655	1.44212	-1.95749	1.2317	-8.23359	3.03396	2.03925	-0.407446	4.96609		0.05035	0.291189	-1.26532	0.438335	-0.382168	-0.850689	1.86491	1.10717	-1.64005	-0.665897
0.0504	-1.49514	-0.32868	0.99424	-3.71566	0.05354	-0.44435	-1.95172	-0.05052	1.62405		0.0504	-7.36232	-1.52219	-5.28064	0.826059	-9.04487	2.17587	0.135856	-1.09392	3.49953		0.0504	0.290091	-1.26249	0.441358	-0.373974	-0.859824	1.85895	1.10186	-1.64075	-0.655971
0.05045	-1.49507	-0.32833	0.99197	-3.73579	0.03911	-0.43386	-1.95926	-0.08001	1.62344		0.05045	-6.66024	-2.92634	-5.99831	2.69825	-8.23359	4.4225	0.666311	0.591058	2.56344		0.05045	0.289055	-1.25957	0.444352	-0.36584	-0.86896	1.85294	1.09664	-1.64135	-0.646013
0.0505	-1.49465	-0.32806	0.98921	-3.75541	0.02459	-0.42367	-1.96648	-0.10956	1.62251		0.0505	-6.12979	-1.91223	-4.36014	5.30373	-8.3584	4.04806	2.60091	2.29164	1.37771		0.0505	0.288081	-1.25656	0.447317	-0.357766	-0.878096	1.84687	1.09151	-1.64184	-0.636026
0.05055	-1.49386	-0.32787	0.98596	-3.77452	0.00999	-0.41378	-1.97338	-0.13914	1.62128		0.05055	-6.45742	-0.0400369	-5.60827	5.75617	-7.07907	3.424	1.74282	4.10142	0.644435		0.05055	0.287168	-1.25346	0.45025	-0.349753	-0.88723	1.84075	1.08647	-1.64223	-0.626012
0.0506	-1.4927	-0.32774	0.98223	-3.7931	-0.00467	-0.4042	-1.97996	-0.16875	1.61973		0.0506	-5.2717	0.0535729	-5.53027	3.80597	-7.95276	3.29919	0.619506	4.30425	1.58053		0.0506	0.286317	-1.25027	0.453152	-0.341804	-0.896363	1.83458	1.08153	-1.64253	-0.615974
0.05065	-1.49118	-0.32768	0.97801	-3.81115	-0.01938	-0.39493	-1.98621	-0.19838	1.61788		0.05065	-2.74423	-1.66261	-2.83118	1.99618	-8.07757	3.72043	1.04075	1.77678	3.39032		0.05065	0.285528	-1.24699	0.456018	-0.333917	-0.905491	1.82836	1.07668	-1.64272	-0.605913
0.0507	-1.48929	-0.32767	0.9733	-3.82867	-0.03414	-0.38597	-1.99213	-0.22803	1.61572		0.0507	-0.716021	-3.44119	-1.77027	2.76066	-6.82944	5.15578	1.27477	1.37114	4.186		0.0507	0.284799	-1.24362	0.45885	-0.326092	-0.914615	1.82209	1.07192	-1.64282	-0.595835
0.05075	-1.48703	-0.32771	0.9681	-3.84566	-0.04894	-0.37732	-1.9977	-0.25769	1.61327		0.05075	-0.247972	-2.22426	-1.94189	3.86838	-6.68903	5.06217	0.198262	0.138611	4.23281		0.05075	0.28413	-1.24017	0.461646	-0.318332	-0.923734	1.81576	1.06726	-1.64282	-0.58574
0.0508	-1.4844	-0.32779	0.96242	-3.8621	-0.06376	-0.36899	-2.00293	-0.28735	1.61051		0.0508	-3.13427	-0.0868418	-3.11201	1.38772	-5.4721	4.00126	-0.597421	-1.49956	4.27961		0.0508	0.28352	-1.23664	0.464405	-0.310637	-0.932846	1.80939	1.06269	-1.64274	-0.575632
0.05085	-1.48139	-0.32791	0.95626	-3.878	-0.0786	-0.36097	-2.00782	-0.317	1.60746		0.05085	-4.94406	-0.539289	-2.9872	-1.15535	-3.72472	2.92475	0.697515	-0.797487	5.79297		0.05085	0.282967	-1.23302	0.467125	-0.303008	-0.94195	1.80296	1.05822	-1.64256	-0.565511
0.0509	-1.47801	-0.32806	0.9496	-3.89335	-0.09345	-0.35328	-2.01235	-0.34665	1.60411		0.0509	-7.29991	-0.523687	-1.17741	-0.000826886	-5.4565	3.25238	-0.0045588	1.40234	4.74766		0.0509	0.28247	-1.22932	0.469804	-0.295446	-0.951043	1.79649	1.05386	-1.64229	-0.555383
0.05095	-1.47426	-0.32823	0.94246	-3.90814	-0.1083	-0.3459	-2.01652	-0.37627	1.60047		0.05095	-9.1097	-0.227256	-3.14322	2.12099	-6.79824	4.20408	-1.89236	2.15122	3.74916		0.05095	0.282027	-1.22554	0.472439	-0.287952	-0.960125	1.78998	1.04959	-1.64193	-0.545249
0.051	-1.47013	-0.32842	0.93484	-3.92237	-0.12313	-0.33886	-2.02033	-0.40586	1.59654		0.051	-8.31401	-0.804517	-3.54886	2.96348	-6.4082	4.70333	-3.99858	2.04201	4.01439		0.051	0.281637	-1.22168	0.475031	-0.280527	-0.969193	1.78341	1.04543	-1.64148	-0.535114
0.05105	-1.46562	-0.32862	0.92674	-3.93604	-0.13794	-0.33213	-2.02378	-0.43543	1.59232		0.05105	-4.99087	-1.36618	-3.25243	3.1663	-4.69202	4.3913	-2.56323	2.24483	5.1377		0.05105	0.2813	-1.21775	0.477577	-0.273171	-0.97825	1.77681	1.04137	-1.64095	-0.524982
0.0511	-1.46074	-0.32883	0.91815	-3.94915	-0.15272	-0.32573	-2.02685	-0.46495	1.58782		0.0511	-3.49311	-1.41298	-4.34454	2.44863	-2.91343	3.25238	-0.0825669	0.684668	5.69936		0.0511	0.281016	-1.21375	0.480079	-0.265886	-0.987291	1.77017	1.03742	-1.64032	-0.514855
0.05115	-1.45548	-0.32903	0.90909	-3.96169	-0.16746	-0.31966	-2.02956	-0.49442	1.58304		0.05115	-4.00796	0.287597	-6.38836	1.77776	-2.47659	3.62682	-1.68953	0.575457	4.68526		0.05115	0.280783	-1.20967	0.482536	-0.258672	-0.996319	1.76349	1.03358	-1.6396	-0.50474
0.0512	-1.44984	-0.32923	0.89954	-3.97366	-0.18216	-0.31392	-2.03188	-0.52384	1.57798		0.0512	-1.52731	2.08178	-6.73159	1.84017	-2.77302	6.07628	-3.06248	1.71438	4.74766		0.0512	0.280601	-1.20552	0.484949	-0.251531	-1.00533	1.75678	1.02984	-1.63879	-0.494639
0.05125	-1.44382	-0.32942	0.88952	-3.98505	-0.19679	-0.3085	-2.03382	-0.55319	1.57264		0.05125	-0.294777	0.537223	-6.13873	2.66705	-4.72322	7.66764	-2.39161	1.48035	4.31082		0.05125	0.28047	-1.20131	0.487316	-0.244464	-1.01432	1.75002	1.02622	-1.6379	-0.484556
0.0513	-1.43743	-0.32958	0.87903	-3.99586	-0.21136	-0.30342	-2.03538	-0.58248	1.56704		0.0513	-1.41809	0.989671	-3.75168	1.2317	-6.3926	5.03097	-2.3604	2.61927	3.42152		0.0513	0.280388	-1.19702	0.48964	-0.237473	-1.0233	1.74324	1.0227	-1.63692	-0.474496
0.05135	-1.43066	-0.32973	0.86807	-4.00609	-0.22586	-0.29866	-2.03655	-0.61169	1.56116		0.05135	-4.11718	1.97257	-2.48795	0.155189	-7.17268	2.39429	-2.25119	1.83919	1.89256		0.05135	0.280355	-1.19268	0.491918	-0.230562	-1.03225	1.73643	1.01929	-1.63585	-0.464461
0.0514	-1.42351	-0.32984	0.85664	-4.01574	-0.24027	-0.29423	-2.03732	-0.64082	1.55502		0.0514	-6.12979	1.50452	-2.22272	-0.858916	-7.87475	1.78583	-0.535014	0.481847	0.082776		0.0514	0.280371	-1.18828	0.49415	-0.223732	-1.04118	1.72959	1.01599	-1.6347	-0.454457
0.05145	-1.41599	-0.32991	0.84475	-4.02481	-0.25458	-0.29014	-2.03771	-0.66986	1.54862		0.05145	-6.37941	-1.33497	-2.0355	-0.749705	-6.73583	0.163259	-0.0825669	0.856286	0.831654		0.05145	0.280434	-1.18381	0.496336	-0.216985	-1.05008	1.72272	1.0128	-1.63347	-0.444486
0.0515	-1.40809	-0.32995	0.8324	-4.03328	-0.2688	-0.28637	-2.03769	-0.6988	1.54196		0.0515	-6.2858	-4.28368	-0.97459	0.919669	-4.78563	1.92624	-1.78314	1.79238	3.04709		0.0515	0.280542	-1.1793	0.498475	-0.210324	-1.05895	1.71582	1.00973	-1.63216	-0.434556
0.05155	-1.39981	-0.32993	0.81959	-4.04117	-0.2829	-0.28292	-2.03727	-0.72764	1.53504		0.05155	-5.17809	-3.70642	1.47487	2.71386	-3.5999	3.65802	-4.60704	2.63487	3.40592		0.05155	0.280695	-1.17473	0.500568	-0.203749	-1.0678	1.7089	1.00677	-1.63076	-0.42467
0.0516	-1.39117	-0.32987	0.80632	-4.04846	-0.29689	-0.27981	-2.03645	-0.75637	1.52787		0.0516	-5.03767	-1.45979	0.835199	1.76216	-1.86812	5.18698	-4.217	0.949896	1.17489		0.0516	0.28089	-1.1701	0.502613	-0.197263	-1.07661	1.70196	1.00393	-1.62928	-0.414835
0.05165	-1.38215	-0.32974	0.7926	-4.05516	-0.31075	-0.27702	-2.03523	-0.78499	1.52045		0.05165	-4.47601	1.2705	0.00831255	-0.328461	0.550129	5.17138	-3.51493	-1.03151	0.0203695		0.05165	0.281128	-1.16543	0.504611	-0.190865	-1.08539	1.69499	1.00121	-1.62772	-0.405055
0.0517	-1.37276	-0.32955	0.77844	-4.06127	-0.32448	-0.27456	-2.0336	-0.81348	1.51278		0.0517	-4.03917	3.53274	-0.865379	-1.99784	3.1868	3.98566	-3.96737	0.637863	-1.85183		0.0517	0.281406	-1.16071	0.50656	-0.184558	-1.09414	1.68801	0.998593	-1.62608	-0.395334
0.05175	-1.363	-0.32929	0.76383	-4.06678	-0.33806	-0.27243	-2.03155	-0.84184	1.50487		0.05175	-4.13278	5.82618	-0.990192	-0.156843	2.87477	3.75163	-6.37002	0.684668	-4.5197		0.05175	0.281725	-1.15594	0.50846	-0.178345	-1.10285	1.68101	0.996095	-1.62436	-0.385678
0.0518	-1.35287	-0.32896	0.74879	-4.07169	-0.35149	-0.27061	-2.02909	-0.87007	1.49673		0.0518	-3.21228	4.57805	0.523166	0.670043	0.00407203	4.4225	-6.49484	-0.844292	-8.63853		0.0518	0.282083	-1.15114	0.510311	-0.172228	-1.11152	1.67399	0.993714	-1.62255	-0.376088
0.05185	-1.34238	-0.32855	0.73331	-4.076	-0.36477	-0.26912	-2.02622	-0.89816	1.48834		0.05185	-0.123159	0.334402	2.58258	-1.43618	-2.13335	3.28358	-4.70065	-1.29674	-10.854		0.05185	0.282478	-1.14629	0.512112	-0.16621	-1.12016	1.66696	0.991446	-1.62066	-0.366569
0.0519	-1.33152	-0.32805	0.71741	-4.07972	-0.37788	-0.26794	-2.02294	-0.92609	1.47973		0.0519	2.29509	-1.52219	2.94142	-4.01045	-2.41418	2.08226	-4.17019	-1.15632	-8.76335		0.0519	0.282909	-1.14141	0.513863	-0.160293	-1.12875	1.65991	0.989294	-1.61869	-0.357123
0.05195	-1.3203	-0.32746	0.70108	-4.08283	-0.39081	-0.26709	-2.01923	-0.95388	1.47089		0.05195	1.90505	-2.38028	1.74009	-2.5907	-1.94613	1.80143	-1.76754	-1.42155	-9.60584		0.05195	0.283375	-1.13649	0.515561	-0.154479	-1.13729	1.65285	0.987256	-1.61664	-0.347754
0.052	-1.30872	-0.32678	0.68433	-4.08535	-0.40357	-0.26655	-2.01511	-0.9815	1.46182		0.052	-1.27768	-1.36618	-1.19301	0.763653	-2.10215	1.91064	1.35278	2.30724	-11.4312		0.052	0.283875	-1.13154	0.517208	-0.148772	-1.14579	1.64579	0.985335	-1.61451	-0.338464
0.05205	-1.29679	-0.326	0.66717	-4.08726	-0.41614	-0.26632	-2.01056	-1.00896	1.45254		0.05205	-1.38689	0.818053	-2.19152	2.199	-2.39858	1.81703	0.479092	2.08881	-11.3376		0.05205	0.284409	-1.12657	0.5188	-0.143174	-1.15424	1.63871	0.98353	-1.61231	-0.329257
0.0521	-1.2845	-0.32512	0.6496	-4.08858	-0.42851	-0.2664	-2.00559	-1.03624	1.44303		0.0521	-0.497598	2.36261	0.382752	0.966474	-1.89933	1.36458	-0.410201	-0.469852	-9.85546		0.0521	0.284974	-1.12157	0.52034	-0.137686	-1.16264	1.63162	0.981842	-1.61002	-0.320136
0.05215	-1.27186	-0.32413	0.63163	-4.08929	-0.44069	-0.26679	-2.0002	-1.06335	1.43331		0.05215	-1.32448	1.56693	0.538768	-1.15535	1.08058	2.36309	-0.30099	0.731473	-10.2923		0.05215	0.285569	-1.11655	0.521825	-0.13231	-1.17098	1.62452	0.980272	-1.60766	-0.311106
0.0522	-1.25887	-0.32303	0.61326	-4.08941	-0.45265	-0.26749	-1.99439	-1.09027	1.42339		0.0522	-3.10307	1.50452	1.74009	-0.905721	1.33021	3.15877	-0.269786	2.75968	-10.8072		0.0522	0.286194	-1.11151	0.523254	-0.127048	-1.17927	1.61742	0.978819	-1.60523	-0.30217
0.05225	-1.24554	-0.32181	0.59451	-4.08892	-0.4644	-0.26848	-1.98815	-1.117	1.41326		0.05225	-3.78954	1.67614	5.20365	1.80896	0.84656	2.12906	-0.800242	4.47586	-9.82426		0.05225	0.286845	-1.10645	0.524628	-0.1219	-1.1875	1.61032	0.977485	-1.60272	-0.293333
0.0523	-1.23187	-0.32047	0.57537	-4.08784	-0.47593	-0.26978	-1.98149	-1.14354	1.40292		0.0523	-3.83635	4.40643	6.70141	3.69676	0.160088	0.0384455	-1.00306	3.04051	-10.4015		0.0523	0.28752	-1.10137	0.525944	-0.116868	-1.19565	1.60321	0.976266	-1.60014	-0.284598
0.05235	-1.21786	-0.31901	0.55585	-4.08616	-0.48724	-0.27136	-1.9744	-1.16987	1.39239		0.05235	-2.51021	4.76526	5.06324	3.01029	0.394113	-0.866449	-2.3448	-0.376243	-10.854		0.05235	0.288217	-1.09627	0.527203	-0.111953	-1.20375	1.5961	0.975164	-1.59748	-0.275967
0.0524	-1.20351	-0.31742	0.53595	-4.08389	-0.49831	-0.27324	-1.96689	-1.196	1.38166		0.0524	-0.918842	2.42502	2.31735	2.41743	1.37702	0.600104	-3.40571	-0.313836	-7.68684		0.0524	0.288934	-1.09117	0.528403	-0.107157	-1.21177	1.589	0.974175	-1.59476	-0.267446
0.05245	-1.18884	-0.3157	0.5157	-4.08102	-0.50914	-0.27541	-1.95895	-1.22192	1.37074		0.05245	0.641321	1.34851	0.429557	2.10539	0.971373	4.01686	-3.85816	0.528652	-5.01896		0.05245	0.289669	-1.08605	0.529543	-0.102482	-1.21971	1.58189	0.973301	-1.59195	-0.259036
0.0525	-1.17384	-0.31384	0.49508	-4.07756	-0.51972	-0.27786	-1.95059	-1.24761	1.35964		0.0525	3.01277	1.95697	0.27354	1.84017	0.487723	4.70333	-4.56023	-0.703877	-5.11257		0.0525	0.290418	-1.08092	0.530621	-0.0979305	-1.22758	1.57479	0.97254	-1.58908	-0.250744
0.05255	-1.15851	-0.31185	0.47412	-4.0735	-0.53006	-0.2806	-1.9418	-1.27309	1.34835		0.05255	3.04397	3.1427	0.601174	1.32531	0.737349	2.00425	-4.48223	-3.20014	-4.72253		0.05255	0.29118	-1.07579	0.531637	-0.0935041	-1.23537	1.5677	0.971891	-1.58614	-0.242573
0.0526	-1.14287	-0.30972	0.45281	-4.06886	-0.54014	-0.2836	-1.93259	-1.29834	1.33688		0.0526	1.01576	2.37822	1.24084	-1.32697	-0.40157	0.75612	-3.65534	-1.40595	-3.91124		0.0526	0.291952	-1.07066	0.532588	-0.0892039	-1.24307	1.56061	0.97135	-1.58312	-0.234526
0.05265	-1.12691	-0.30744	0.43116	-4.06363	-0.54996	-0.28688	-1.92296	-1.32335	1.32524		0.05265	-0.716021	-1.83422	1.20964	-3.82323	-2.18016	0.818527	-3.2809	2.12002	-6.32949		0.05265	0.292732	-1.06552	0.533475	-0.0850311	-1.2507	1.55354	0.970918	-1.58003	-0.226609
0.0527	-1.11065	-0.30502	0.40918	-4.05781	-0.55952	-0.29042	-1.9129	-1.34813	1.31343		0.0527	0.688125	-5.71903	-0.147704	-4.83733	-0.978831	3.03396	-3.99858	3.19653	-6.59472		0.0527	0.293517	-1.06039	0.534296	-0.0809873	-1.25824	1.54647	0.970594	-1.57687	-0.218821
0.05275	-1.09408	-0.30244	0.38688	-4.05141	-0.5688	-0.29423	-1.90242	-1.37266	1.30144		0.05275	0.126467	-4.5177	-1.41144	-2.79352	0.191292	5.29619	-3.81136	0.778278	-3.41199		0.05275	0.294306	-1.05526	0.535052	-0.0770732	-1.2657	1.53941	0.970376	-1.57363	-0.211166
0.0528	-1.07722	-0.29972	0.36427	-4.04443	-0.57781	-0.29829	-1.89152	-1.39695	1.2893		0.0528	-1.58971	-1.05414	1.41246	1.99618	-0.432774	5.70184	-6.35442	-1.20313	-1.77382		0.0528	0.295098	-1.05014	0.535742	-0.0732908	-1.27307	1.53237	0.970265	-1.57032	-0.203646
0.05285	-1.06006	-0.29684	0.34135	-4.03688	-0.58654	-0.30261	-1.8802	-1.42098	1.27699		0.05285	-2.4634	1.48892	4.78241	3.30672	-0.229952	5.17138	-7.94579	-0.547861	-2.99074		0.05285	0.29589	-1.04502	0.536366	-0.0696396	-1.28035	1.52534	0.97026	-1.56694	-0.196263
0.0529	-1.04261	-0.2938	0.31812	-4.02875	-0.59498	-0.30717	-1.86847	-1.44475	1.26453		0.0529	-1.55851	-0.445679	1.47487	-0.110038	0.331706	3.62682	-2.62563	0.559855	-4.31688		0.0529	0.296681	-1.03992	0.536923	-0.066119	-1.28753	1.51833	0.970359	-1.56349	-0.189022
0.05295	-1.02487	-0.29061	0.29461	-4.02005	-0.60314	-0.31197	-1.85632	-1.46827	1.25191		0.05295	-1.4805	-1.75622	0.0239142	-2.6219	1.34581	0.522096	2.07046	1.52716	-5.19057		0.05295	0.29747	-1.03483	0.537412	-0.0627291	-1.29462	1.51134	0.970564	-1.55996	-0.181925
0.053	-1.00686	-0.28726	0.27081	-4.01079	-0.611	-0.31701	-1.84375	-1.49151	1.23914		0.053	-3.50871	-0.461281	1.41246	-2.88713	2.11029	0.241267	2.5073	1.13712	-4.16087		0.053	0.298252	-1.02975	0.537835	-0.0594678	-1.3016	1.50438	0.97087	-1.55637	-0.174978
0.05305	-0.98858	-0.28374	0.24674	-4.00096	-0.61857	-0.32228	-1.83078	-1.51449	1.22623		0.05305	-3.77394	0.677638	1.63088	-2.30987	1.98548	2.06666	0.603905	-0.204625	-4.14527		0.05305	0.299026	-1.02469	0.538189	-0.0563345	-1.30848	1.49743	0.971279	-1.55271	-0.168183
0.0531	-0.97003	-0.28006	0.2224	-3.99057	-0.62584	-0.32778	-1.81739	-1.53719	1.21318		0.0531	-1.4649	1.76975	0.133126	-0.952526	0.721747	1.505	-0.659827	-0.82869	-4.86294		0.0531	0.29979	-1.01965	0.538472	-0.0533272	-1.31526	1.49051	0.971789	-1.54899	-0.161542
0.05315	-0.95122	-0.27622	0.1978	-3.97962	-0.63281	-0.3335	-1.8036	-1.55961	1.19999		0.05315	-0.918842	0.818053	-0.49094	-0.375266	-0.214351	1.23977	-4.07658	-0.173421	-3.94244		0.05315	0.300543	-1.01463	0.538685	-0.0504445	-1.32192	1.48361	0.972401	-1.54519	-0.155058
0.0532	-0.93216	-0.27221	0.17295	-3.96813	-0.63947	-0.33942	-1.7894	-1.58175	1.18666		0.0532	-0.107558	-1.33497	-0.39733	-2.06024	1.98548	3.75163	-7.00969	0.279026	-4.97215		0.0532	0.301283	-1.00964	0.538827	-0.0476861	-1.32848	1.47674	0.973112	-1.54133	-0.148732
0.05325	-0.91285	-0.26803	0.14785	-3.95609	-0.64583	-0.34556	-1.7748	-1.6036	1.1732		0.05325	-1.07486	-1.03854	-1.115	-3.82323	1.65784	5.46781	-8.1018	0.0762046	-5.4714		0.05325	0.302007	-1.00467	0.538898	-0.0450514	-1.33492	1.4699	0.973919	-1.53741	-0.142567
0.0533	-0.8933	-0.26369	0.12252	-3.9435	-0.65187	-0.3519	-1.7598	-1.62516	1.15962		0.0533	-0.41959	-1.19456	-2.22272	-4.36928	0.2693	3.68923	-8.88189	0.528652	-4.66012		0.0533	0.302713	-0.999728	0.538899	-0.0425409	-1.34124	1.46309	0.974825	-1.53342	-0.136565
0.05335	-0.87351	-0.25917	0.09697	-3.93038	-0.6576	-0.35843	-1.74441	-1.64643	1.14591		0.05335	3.18439	-0.991736	-3.17442	-3.72962	1.67345	0.444088	-8.42944	3.35255	-3.41199		0.05335	0.303399	-0.994821	0.538831	-0.0401538	-1.34745	1.45631	0.975825	-1.52936	-0.130725
0.0534	-0.8535	-0.25449	0.0712	-3.91673	-0.66301	-0.36516	-1.72862	-1.6674	1.13208		0.0534	3.04397	-2.02144	-2.0043	-2.84032	2.45353	-1.97416	-7.18131	2.18242	-3.39639		0.0534	0.304061	-0.989949	0.538693	-0.0378916	-1.35352	1.44956	0.976921	-1.52523	-0.12505
0.05345	-0.83326	-0.24964	0.04522	-3.90255	-0.6681	-0.37206	-1.71245	-1.68806	1.11813		0.05345	1.01576	-2.41148	0.523166	-2.52829	0.84656	-1.50612	-4.73185	2.36964	-4.98775		0.05345	0.304698	-0.985113	0.538485	-0.0357514	-1.35947	1.44285	0.97811	-1.52104	-0.11954
0.0535	-0.81281	-0.24462	0.01904	-3.88785	-0.67287	-0.37914	-1.69589	-1.70842	1.10407		0.0535	-0.279176	-2.20866	2.25495	0.186393	-0.822814	0.537698	-0.909453	2.26043	-4.42609		0.0535	0.305307	-0.980316	0.538207	-0.0337332	-1.36529	1.43618	0.979393	-1.51679	-0.114197
0.05355	-0.79215	-0.23944	-0.00732	-3.87263	-0.67732	-0.38639	-1.67895	-1.72847	1.0899		0.05355	-0.918842	-2.50509	2.62939	1.45012	-2.47659	2.59711	1.4776	0.762676	-4.00485		0.05355	0.305887	-0.975559	0.537858	-0.0318365	-1.37098	1.42955	0.980766	-1.51247	-0.109022
0.0536	-0.77129	-0.23408	-0.03387	-3.8569	-0.68145	-0.39381	-1.66163	-1.74821	1.07563		0.0536	-1.40249	-2.22426	2.56698	-0.546884	-2.47659	4.45371	0.775523	1.82359	-5.95505		0.0536	0.306436	-0.970843	0.537438	-0.0300601	-1.37653	1.42296	0.982233	-1.5081	-0.104017
0.05365	-0.75024	-0.22856	-0.06059	-3.84067	-0.68525	-0.40138	-1.64393	-1.76763	1.06125		0.05365	0.937752	-2.23987	2.08333	-1.48298	0.113283	6.93437	-0.925055	1.30873	-7.82725		0.05365	0.306951	-0.966169	0.536947	-0.028405	-1.38193	1.41643	0.983792	-1.50367	-0.0991832
0.0537	-0.729	-0.22286	-0.08748	-3.82394	-0.68872	-0.4091	-1.62587	-1.78673	1.04677		0.0537	3.07517	-2.08385	0.117524	-1.34257	3.1088	5.90466	-1.09667	0.232221	-6.32949		0.0537	0.307431	-0.961538	0.536385	-0.0268722	-1.3872	1.40995	0.985444	-1.49919	-0.0945233
0.05375	-0.70758	-0.217	-0.11452	-3.80672	-0.69186	-0.41696	-1.60744	-1.80551	1.03219		0.05375	1.06256	-1.14775	-0.0384923	-0.905721	4.49734	3.12757	-3.51493	-0.610267	-4.4573		0.05375	0.307872	-0.956951	0.535751	-0.0254607	-1.39232	1.40352	0.987192	-1.49465	-0.0900392
0.0538	-0.68599	-0.21098	-0.1417	-3.78901	-0.69468	-0.42496	-1.58865	-1.82397	1.01752		0.0538	-1.88614	-0.476883	0.991215	1.1849	2.70315	2.56591	-7.72737	1.0279	-6.71953		0.0538	0.308274	-0.952411	0.535046	-0.0241723	-1.39729	1.39715	0.989033	-1.49007	-0.0857329
0.05385	-0.66424	-0.20479	-0.16903	-3.77083	-0.69717	-0.43309	-1.56951	-1.8421	1.00276		0.05385	-0.99685	-2.03705	2.56698	1.49693	1.2678	2.23828	-9.16271	2.54126	-4.4417		0.05385	0.308632	-0.947917	0.53427	-0.0230064	-1.40211	1.39083	0.99097	-1.48543	-0.0816053
0.0539	-0.64233	-0.19844	-0.19648	-3.75217	-0.69932	-0.44133	-1.55001	-1.8599	0.98791		0.0539	0.438499	-3.03555	2.58258	-0.500079	2.32871	1.67662	-10.6605	2.26043	-0.338468		0.0539	0.308944	-0.94347	0.533421	-0.0219635	-1.40677	1.38457	0.993001	-1.48076	-0.0776585
0.05395	-0.62028	-0.19192	-0.22404	-3.73305	-0.70115	-0.4497	-1.53016	-1.87737	0.97298		0.05395	-0.435192	-2.84833	0.320345	-1.23336	4.62215	2.61271	-9.25632	0.528652	-0.790915		0.05395	0.309209	-0.939071	0.5325	-0.0210419	-1.41128	1.37838	0.995126	-1.47605	-0.0738933
0.054	-0.59808	-0.18525	-0.25172	-3.71347	-0.70265	-0.45817	-1.50998	-1.8945	0.95797		0.054	-3.4307	0.193988	0.835199	0.45162	3.54564	4.56292	-5.76156	-0.64147	-4.53531		0.054	0.309424	-0.934723	0.531508	-0.0202406	-1.41563	1.37224	0.997344	-1.4713	-0.0703107
0.05405	-0.57575	-0.17842	-0.27949	-3.69344	-0.70381	-0.46673	-1.48946	-1.91129	0.94287		0.05405	-6.19219	1.00527	1.33445	1.52813	-0.0583345	6.3103	-7.83658	-1.37475	-5.08136		0.05405	0.309587	-0.930427	0.530445	-0.0195591	-1.41982	1.36617	0.999657	-1.46652	-0.0669108
0.0541	-0.5533	-0.17143	-0.30736	-3.67296	-0.70465	-0.4754	-1.46861	-1.92775	0.92771		0.0541	-5.10008	-2.33348	0.882004	2.54224	-3.35028	6.38831	-10.2704	0.669066	-2.27307		0.0541	0.309695	-0.926184	0.529313	-0.0189969	-1.42384	1.36017	1.00206	-1.4617	-0.0636942
0.05415	-0.53073	-0.16428	-0.3353	-3.65206	-0.70515	-0.48414	-1.44743	-1.94386	0.91247		0.05415	-3.85195	-6.29629	2.33296	1.2161	-4.17716	4.87495	-6.97849	3.8206	-0.120045		0.05415	0.309747	-0.921999	0.528111	-0.0185524	-1.4277	1.35424	1.00456	-1.45686	-0.0606614
0.0542	-0.50806	-0.15699	-0.36332	-3.63072	-0.70533	-0.49297	-1.42593	-1.95963	0.89716		0.0542	-2.49461	-8.41811	3.30026	-2.12265	-0.245554	5.40541	-4.59144	5.88001	-0.915728		0.0542	0.309741	-0.91787	0.526841	-0.0182256	-1.43139	1.34837	1.00715	-1.45198	-0.0578144
0.05425	-0.48529	-0.14955	-0.3914	-3.60897	-0.70517	-0.50186	-1.40413	-1.97505	0.88178		0.05425	-3.21228	-9.245	1.63088	-2.99634	0.472121	7.83926	-5.46513	3.77379	-3.03755		0.05425	0.309677	-0.913801	0.525502	-0.0180156	-1.43491	1.34258	1.00984	-1.44708	-0.0551547
0.0543	-0.46242	-0.14195	-0.41954	-3.5868	-0.70469	-0.51082	-1.38201	-1.99013	0.86634		0.0543	-4.89726	-7.66923	-0.319322	-0.250453	-0.229952	7.55843	-4.71625	-8.28627	-2.92834		0.0543	0.309554	-0.909792	0.524093	-0.0179215	-1.43825	1.33686	1.01261	-1.44215	-0.0526834
0.05435	-0.43947	-0.13422	-0.44772	-3.56423	-0.70389	-0.51983	-1.35959	-2.00485	0.85083		0.05435	-4.83485	-6.28069	0.0863207	3.54074	-0.0739361	3.61122	-4.45102	-12.8107	-2.75672		0.05435	0.30937	-0.905845	0.522615	-0.0179422	-1.44141	1.33122	1.01547	-1.43721	-0.0504013
0.0544	-0.41645	-0.12635	-0.47593	-3.54127	-0.70275	-0.52889	-1.33687	-2.01922	0.83527		0.0544	-2.66622	-5.95305	-0.256915	6.28663	1.81386	2.92475	-6.44803	-6.74171	-3.20917		0.0544	0.309124	-0.90196	0.521066	-0.0180779	-1.4444	1.32566	1.01842	-1.43224	-0.0483102
0.05445	-0.39337	-0.11833	-0.50417	-3.51792	-0.7013	-0.53799	-1.31387	-2.03324	0.81965		0.05445	-2.66622	-4.76733	0.0551174	6.13061	1.64224	3.56441	-7.32172	-0.423048	-3.49		0.05445	0.308815	-0.898141	0.519448	-0.0183264	-1.4472	1.32018	1.02146	-1.42726	-0.0464119
0.0545	-0.37022	-0.11019	-0.53243	-3.49419	-0.69952	-0.54713	-1.29059	-2.04691	0.80398		0.0545	-6.2702	-1.45979	1.67769	3.97759	-1.33767	3.31479	-6.91608	3.08732	-3.70842		0.0545	0.308441	-0.894386	0.517762	-0.0186863	-1.44982	1.31477	1.02459	-1.42226	-0.0447071
0.05455	-0.34703	-0.10191	-0.56069	-3.4701	-0.69742	-0.55629	-1.26702	-2.06022	0.78825		0.05455	-7.79916	0.225191	3.09744	0.950872	-2.88223	4.03246	-5.74596	4.05462	-5.73663		0.05455	0.308002	-0.8907	0.516007	-0.0191565	-1.45226	1.30945	1.02779	-1.41725	-0.0431974
0.0546	-0.3238	-0.09351	-0.58896	-3.44564	-0.69501	-0.56546	-1.24319	-2.07317	0.77248		0.0546	-5.41211	-1.16335	2.7854	0.826059	-1.54049	3.72043	-7.29052	5.48997	-8.81015		0.0546	0.307495	-0.887083	0.514184	-0.0197359	-1.45451	1.30421	1.03108	-1.41223	-0.0418829
0.05465	-0.30054	-0.08498	-0.61721	-3.42084	-0.69227	-0.57465	-1.2191	-2.08577	0.75666		0.05465	-3.91436	-1.11655	-0.459736	1.84017	0.768552	3.98566	-6.27641	3.18093	-9.44982		0.05465	0.306917	-0.883538	0.512294	-0.0204212	-1.45659	1.29906	1.03446	-1.4072	-0.0407639
0.0547	-0.27726	-0.07634	-0.64544	-3.39569	-0.68923	-0.58384	-1.19475	-2.098	0.74079		0.0547	-3.91436	-2.06825	-1.0994	1.59054	2.51593	4.98416	-3.87376	4.42906	-8.84136		0.0547	0.306269	-0.880068	0.510338	-0.0212099	-1.45847	1.29399	1.03791	-1.40217	-0.0398406
0.05475	-0.25396	-0.06758	-0.67365	-3.37022	-0.68587	-0.59303	-1.17015	-2.10987	0.72488		0.05475	-4.46041	-4.62692	1.10043	0.373612	2.06349	3.54881	-2.98447	6.11403	-8.76335		0.05475	0.305546	-0.876673	0.508317	-0.0221003	-1.46017	1.28901	1.04144	-1.39713	-0.0391134
0.0548	-0.23066	-0.05871	-0.70181	-3.34442	-0.6822	-0.6022	-1.14531	-2.12139	0.70893		0.0548	-4.3356	-9.35421	0.148727	1.09129	-0.526383	2.98715	-4.01418	5.33395	-7.98327		0.0548	0.304749	-0.873356	0.506232	-0.0230901	-1.4617	1.28411	1.04504	-1.39209	-0.0385826
0.05485	-0.20736	-0.04973	-0.72994	-3.31831	-0.67823	-0.61135	-1.12024	-2.13254	0.69294		0.05485	-3.96116	-10.7584	0.335947	0.716848	-0.932026	3.64242	-6.44803	3.24334	-6.4231		0.05485	0.303877	-0.870117	0.504084	-0.0241763	-1.46303	1.27931	1.04872	-1.38705	-0.0382498
0.0549	-0.18408	-0.04066	-0.758	-3.2919	-0.67395	-0.62048	-1.09494	-2.14332	0.67692		0.0549	-4.02357	-7.88766	0.991215	0.045978	1.42382	5.63943	-7.50894	0.840684	-4.53531		0.0549	0.302926	-0.866958	0.501874	-0.0253568	-1.46418	1.2746	1.05247	-1.38201	-0.0381148
0.05495	-0.16081	-0.03148	-0.78601	-3.26519	-0.66937	-0.62957	-1.06942	-2.15374	0.66086		0.05495	-2.61942	-4.82974	1.28765	-0.79651	1.03378	7.97967	-6.52604	-0.547861	-2.94394		0.05495	0.301899	-0.863879	0.499599	-0.0266298	-1.46514	1.26998	1.0563	-1.37698	-0.0381784
0.055	-0.13758	-0.02221	-0.81394	-3.23821	-0.6645	-0.63863	-1.04368	-2.1638	0.64477		0.055	-3.08747	-4.25248	1.74009	0.794856	-1.38447	6.71594	-5.57434	-0.345039	-2.69431		0.055	0.300795	-0.86088	0.497262	-0.0279942	-1.46591	1.26546	1.0602	-1.37196	-0.0384409
0.05505	-0.11439	-0.01286	-0.84178	-3.21095	-0.65933	-0.64763	-1.01775	-2.1735	0.62864		0.05505	-4.16398	-3.92484	2.52017	2.68265	-0.760408	5.87345	-7.55575	1.23073	-4.97215		0.05505	0.299611	-0.85796	0.494864	-0.0294481	-1.46648	1.26103	1.06416	-1.36695	-0.0389033
0.0551	-0.09124	-0.00342	-0.86954	-3.18343	-0.65387	-0.65657	-0.99162	-2.18282	0.61249		0.0551	-4.55402	-3.39439	1.38126	4.41443	-2.25816	6.62233	-8.0706	3.77379	-6.3919		0.0551	0.298349	-0.85512	0.492404	-0.0309903	-1.46687	1.25671	1.0682	-1.36194	-0.0395669
0.05515	-0.06816	0.00609	-0.8972	-3.15566	-0.64812	-0.66546	-0.96529	-2.19179	0.59631		0.05515	-3.71153	-2.23987	-0.506541	5.41294	-1.93053	5.03097	-7.58695	4.97512	-9.05978		0.05515	0.297007	-0.852361	0.489886	-0.0326186	-1.46705	1.25248	1.07231	-1.35695	-0.0404324
0.0552	-0.04514	0.01568	-0.92476	-3.12765	-0.64209	-0.67427	-0.93879	-2.20038	0.5801		0.0552	-3.53992	-1.22576	0.46076	6.87949	-1.05684	3.98566	-8.28902	5.31835	-10.854		0.0552	0.295586	-0.849684	0.487307	-0.0343315	-1.46704	1.24835	1.07648	-1.35197	-0.0415006
0.05525	-0.02219	0.02533	-0.9522	-3.0994	-0.63578	-0.683	-0.91211	-2.20861	0.56387		0.05525	-4.55402	-1.66261	0.538768	8.31484	-3.38148	3.54881	-9.44354	6.11403	-10.4483		0.05525	0.294082	-0.847089	0.48467	-0.0361279	-1.46684	1.24432	1.08071	-1.347	-0.0427717
0.0553	0.000674019	0.03504	-0.97952	-3.07094	-0.6292	-0.69165	-0.88527	-2.21648	0.54761		0.0553	-3.96116	-2.67671	0.538768	6.037	-2.94464	2.69072	-8.35143	15.6154	-7.17198		0.0553	0.292495	-0.844576	0.481976	-0.0380059	-1.46643	1.24039	1.08501	-1.34205	-0.0442462
0.05535	0.02345	0.04481	-1.0067	-3.04227	-0.62235	-0.70021	-0.85827	-2.22398	0.53134		0.05535	-2.93145	-1.81862	0.538768	1.63734	-1.6497	3.4084	-5.27791	17.4096	-4.61331		0.05535	0.290826	-0.842148	0.479225	-0.039964	-1.46582	1.23656	1.08937	-1.33711	-0.0459236
0.0554	0.04612	0.05462	-1.03375	-3.0134	-0.61522	-0.70867	-0.83113	-2.23111	0.51504		0.0554	-2.55701	-3.05115	-0.21011	-2.69991	-0.261156	5.07777	-4.43542	7.95503	-4.73813		0.0554	0.289072	-0.839803	0.476418	-0.0420005	-1.465	1.23284	1.0938	-1.3322	-0.0478044
0.05545	0.06868	0.06448	-1.06065	-2.98435	-0.60784	-0.71702	-0.80384	-2.23787	0.49873		0.05545	-1.15287	-5.93745	-0.225712	-3.23036	-1.77451	5.18698	-4.60704	1.24633	-5.48701		0.05545	0.287232	-0.837544	0.473556	-0.0441152	-1.46398	1.22921	1.09828	-1.3273	-0.0498885
0.0555	0.09112	0.07438	-1.08739	-2.95512	-0.6002	-0.72526	-0.77642	-2.24428	0.48239		0.0555	-1.71453	-5.93745	1.38126	-2.15385	-4.41119	4.89055	-4.37301	1.33994	-4.53531		0.0555	0.285307	-0.835372	0.470638	-0.0463071	-1.46276	1.22569	1.10283	-1.32242	-0.0521776
0.05555	0.11344	0.08431	-1.11397	-2.92572	-0.5923	-0.73338	-0.74887	-2.25031	0.46604		0.05555	-2.30739	-3.45679	1.28765	-0.344063	-2.85103	5.62383	-5.69915	1.26193	-4.28568		0.05555	0.283295	-0.833287	0.467664	-0.0485764	-1.46133	1.22227	1.10743	-1.31757	-0.0546719
0.0556	0.13562	0.09426	-1.14038	-2.89617	-0.58416	-0.74137	-0.72121	-2.25598	0.44968		0.0556	-1.57411	-1.86543	0.117524	1.74656	-2.10215	6.01387	-6.74446	0.809481	-3.64601		0.0556	0.281195	-0.831292	0.464636	-0.0509222	-1.45968	1.21896	1.11209	-1.31275	-0.0573722
0.05565	0.15766	0.10424	-1.16661	-2.86648	-0.57577	-0.74923	-0.69345	-2.26129	0.4333		0.05565	-4.05477	-2.47389	0.788394	4.74207	-3.31907	6.41951	-6.65085	3.00931	-3.49		0.05565	0.279007	-0.829387	0.461555	-0.0533445	-1.45784	1.21576	1.11681	-1.30795	-0.0602788
0.0557	0.17955	0.11422	-1.19266	-2.83666	-0.56714	-0.75696	-0.66558	-2.26624	0.41691		0.0557	-5.06888	-2.86393	-1.72347	6.70787	-2.91343	6.01387	-4.49783	4.67869	-3.66161		0.0557	0.276732	-0.827577	0.45842	-0.0558434	-1.45578	1.21265	1.12157	-1.30319	-0.0633916
0.05575	0.20127	0.12422	-1.21851	-2.80672	-0.55828	-0.76453	-0.63762	-2.27082	0.4005		0.05575	-3.24349	-1.44418	-3.9389	5.56895	-3.10065	5.3586	-3.3121	4.89711	-3.41199		0.05575	0.274368	-0.825859	0.455236	-0.0584179	-1.45351	1.20966	1.12639	-1.29845	-0.0667112
0.0558	0.22283	0.13421	-1.24416	-2.77667	-0.54918	-0.77196	-0.60958	-2.27504	0.38409		0.0558	-2.27618	1.05208	-3.20562	3.19751	-6.34579	6.15428	-4.95028	5.64599	-4.31688		0.0558	0.271918	-0.824237	0.452003	-0.0610656	-1.45103	1.20677	1.13126	-1.29375	-0.0702373
0.05585	0.24422	0.1442	-1.26961	-2.74652	-0.53987	-0.77923	-0.58147	-2.2789	0.36766		0.05585	-3.97676	2.15979	-0.568948	2.41743	-4.86364	8.46333	-6.136	4.35105	-4.64452		0.05585	0.269382	-0.822712	0.448721	-0.0637847	-1.44834	1.20398	1.13616	-1.28909	-0.0739707
0.0559	0.26542	0.15417	-1.29484	-2.71629	-0.53033	-0.78633	-0.5533	-2.2824	0.35122		0.0559	-3.82075	-0.523687	0.975614	3.38473	0.253698	10.9908	-5.94878	1.68317	-5.29979		0.0559	0.26676	-0.821284	0.445393	-0.0665735	-1.44544	1.2013	1.14112	-1.28447	-0.0779105
0.05595	0.28642	0.16413	-1.31985	-2.68599	-0.52058	-0.79327	-0.52506	-2.28554	0.33478		0.05595	-3.99236	-2.92634	1.64648	3.64995	2.85917	12.4885	-3.98297	1.69877	-7.84285		0.05595	0.264053	-0.819954	0.442018	-0.0694306	-1.44233	1.19872	1.1461	-1.2799	-0.0820572
0.056	0.30723	0.17406	-1.34463	-2.65562	-0.51063	-0.80003	-0.49678	-2.28832	0.31832		0.056	-3.19668	-4.29928	3.19104	0.982076	3.09319	11.0064	-4.88787	1.76118	-9.69945		0.056	0.26126	-0.818723	0.438597	-0.0723544	-1.43901	1.19624	1.15113	-1.27537	-0.0864104
0.05605	0.32783	0.18395	-1.36918	-2.62521	-0.50047	-0.8066	-0.46846	-2.29074	0.30186		0.05605	-3.14988	-4.4865	3.14424	-1.84182	1.08058	9.38382	-6.49484	2.61927	-9.99588		0.05605	0.258381	-0.817594	0.435132	-0.0753445	-1.43547	1.19386	1.1562	-1.27088	-0.09097
0.0561	0.34821	0.19381	-1.39348	-2.59475	-0.49011	-0.81299	-0.44011	-2.29281	0.28539		0.0561	-4.81925	-3.08235	0.491963	-1.82622	-0.635595	7.15279	-4.91907	1.66757	-8.04567		0.0561	0.255415	-0.816567	0.431625	-0.078399	-1.43172	1.19159	1.1613	-1.26644	-0.0957347
0.05615	0.36837	0.20362	-1.41754	-2.56427	-0.47957	-0.81919	-0.41174	-2.29452	0.26892		0.05615	-7.58074	-0.554891	-4.48496	-2.51269	-2.5858	3.29919	-3.57733	1.9328	-7.04717		0.05615	0.252361	-0.815644	0.428076	-0.0815167	-1.42776	1.18941	1.16643	-1.26206	-0.100704
0.0562	0.3883	0.21338	-1.44134	-2.53378	-0.46883	-0.82519	-0.38335	-2.29588	0.25244		0.0562	-9.65575	-0.617297	-7.05923	-1.59219	-2.46099	1.27097	-1.58032	1.54276	-5.48701		0.0562	0.249219	-0.814826	0.424487	-0.0846969	-1.42358	1.18733	1.17159	-1.25772	-0.105878
0.05625	0.40799	0.22308	-1.46489	-2.50328	-0.45792	-0.83099	-0.35496	-2.29689	0.23595		0.05625	-10.1706	-3.5036	-6.12313	0.748051	-0.916424	3.4552	-0.925055	0.79388	-5.93945		0.05625	0.245988	-0.814114	0.420857	-0.0879382	-1.41919	1.18535	1.17678	-1.25344	-0.111255
0.0563	0.42743	0.23271	-1.48816	-2.47279	-0.44683	-0.83658	-0.32658	-2.29755	0.21946		0.0563	-10.4358	-3.94044	-5.68628	1.43452	-1.89933	6.2635	-2.51642	1.48035	-6.06427		0.0563	0.242667	-0.813508	0.417189	-0.0912392	-1.41459	1.18347	1.18199	-1.24921	-0.116835
0.05635	0.44662	0.24226	-1.51117	-2.44232	-0.43558	-0.84195	-0.2982	-2.29786	0.20296		0.05635	-9.34372	0.0691745	-6.73159	1.84017	-1.96173	6.24789	-2.92206	1.51155	-5.58062		0.05635	0.239257	-0.813011	0.413483	-0.0945985	-1.40978	1.18168	1.18723	-1.24504	-0.122618
0.0564	0.46556	0.25174	-1.53389	-2.41189	-0.42416	-0.84711	-0.26985	-2.29782	0.18646		0.0564	-6.2234	0.864858	-6.20114	1.94938	-1.99294	6.38831	-0.472608	3.8674	-6.01746		0.0564	0.235758	-0.812622	0.409741	-0.0980139	-1.40476	1.17999	1.19248	-1.24092	-0.128602
0.05645	0.48422	0.26113	-1.55634	-2.3815	-0.41258	-0.85204	-0.24153	-2.29744	0.16996		0.05645	-4.58523	-0.679704	-3.58006	3.1195	-2.78862	6.38831	-0.566217	6.12964	-4.17647		0.05645	0.232171	-0.812341	0.405966	-0.101483	-1.39952	1.17839	1.19775	-1.23686	-0.134788
0.0565	0.50262	0.27042	-1.57849	-2.35116	-0.40086	-0.85675	-0.21325	-2.29671	0.15345		0.0565	-3.78954	-0.383273	-1.80148	4.18041	-1.29086	7.05918	-2.81285	2.22923	-1.30577		0.0565	0.228497	-0.812171	0.402157	-0.105005	-1.39407	1.17689	1.20304	-1.23286	-0.141177
0.05655	0.52073	0.27962	-1.60035	-2.3209	-0.38899	-0.86122	-0.18501	-2.29564	0.13693		0.05655	-4.46041	2.11299	-1.89509	4.85128	-0.0583345	8.38532	-3.51493	1.51155	-0.447679		0.05655	0.224735	-0.812109	0.398318	-0.108576	-1.38841	1.17548	1.20833	-1.22891	-0.147768
0.0566	0.53856	0.2887	-1.62191	-2.29071	-0.37698	-0.86546	-0.15683	-2.29423	0.12042		0.0566	-7.64314	3.87597	-2.45674	2.77626	-0.479578	6.93437	-3.88936	0.731473	-3.17796		0.0566	0.220882	-0.812155	0.394448	-0.112195	-1.38254	1.17416	1.21364	-1.22504	-0.154562
0.05665	0.55609	0.29768	-1.64317	-2.26061	-0.36484	-0.86945	-0.12872	-2.29248	0.1039		0.05665	-12.3236	2.2378	-1.53625	2.54224	-2.30497	5.07777	-3.40571	-0.423048	-5.76783		0.05665	0.21694	-0.812311	0.390551	-0.115861	-1.37645	1.17293	1.21895	-1.22123	-0.161559
0.0567	0.57333	0.30653	-1.66412	-2.23062	-0.35258	-0.87321	-0.10067	-2.29039	0.08737		0.0567	-12.386	0.958467	0.148727	1.46573	-2.69501	3.56441	-2.26679	1.27753	-5.19057		0.0567	0.212904	-0.812574	0.386627	-0.119573	-1.37014	1.1718	1.22428	-1.21748	-0.16876
0.05675	0.59027	0.31525	-1.68475	-2.20074	-0.34019	-0.87671	-0.07271	-2.28797	0.07085		0.05675	-9.37493	1.11448	-0.88098	0.872864	-3.5999	2.4723	-2.70364	2.36964	-3.30278		0.05675	0.208776	-0.812944	0.382679	-0.12333	-1.36363	1.17075	1.2296	-1.2138	-0.176162
0.0568	0.60689	0.32383	-1.70507	-2.17099	-0.3277	-0.87996	-0.04484	-2.28522	0.05432		0.0568	-7.2063	1.86336	0.0707191	2.12099	-3.64671	3.84524	-1.09667	0.949896	-3.44319		0.0568	0.204554	-0.81342	0.378708	-0.127133	-1.35691	1.1698	1.23494	-1.2102	-0.183766
0.05685	0.62319	0.33227	-1.72506	-2.14138	-0.31509	-0.88295	-0.01706	-2.28213	0.03779		0.05685	-7.29991	1.72295	1.30325	3.91518	-2.74181	5.70184	-0.0981686	0.70027	-3.77083		0.05685	0.200237	-0.814001	0.374715	-0.13098	-1.34997	1.16895	1.24028	-1.20666	-0.19157
0.0569	0.63918	0.34057	-1.74472	-2.11192	-0.30238	-0.88569	0.01061	-2.27872	0.02125		0.0569	-6.12979	0.0847761	0.101922	2.68265	-1.11925	6.68474	-0.722234	3.78939	-2.22627		0.0569	0.195827	-0.814688	0.370702	-0.134872	-1.34282	1.16818	1.24562	-1.20319	-0.199573
0.05695	0.65484	0.34871	-1.76405	-2.08262	-0.28958	-0.88816	0.03816	-2.27498	0.00471		0.05695	-4.88166	-0.367671	-0.459736	1.68415	-1.46248	6.2791	-0.176177	5.08433	-0.307265		0.05695	0.191322	-0.815478	0.36667	-0.138808	-1.33546	1.16751	1.25096	-1.19979	-0.207776
0.057	0.67016	0.35669	-1.78305	-2.0535	-0.27669	-0.89037	0.06559	-2.27092	-0.01183		0.057	-5.67734	1.83216	-1.037	0.919669	-2.14895	5.76424	0.0266445	2.9313	0.706841		0.057	0.186723	-0.816372	0.362621	-0.142784	-1.3279	1.16693	1.2563	-1.19648	-0.216177
0.05705	0.68515	0.36449	-1.80171	-2.02456	-0.26372	-0.8923	0.0929	-2.26654	-0.02838		0.05705	-6.44182	2.59664	0.00831255	0.623238	-2.74181	5.23379	-1.01866	1.74558	-0.35407		0.05705	0.182029	-0.817367	0.358555	-0.146802	-1.32013	1.16645	1.26163	-1.19324	-0.224778
0.0571	0.6998	0.37213	-1.82002	-1.99581	-0.25067	-0.89397	0.12006	-2.26184	-0.04492		0.0571	-7.2219	3.25191	0.819597	1.49693	-2.36738	4.98416	-1.87675	3.13412	-1.72701		0.0571	0.177242	-0.818465	0.354475	-0.150859	-1.31215	1.16606	1.26695	-1.19008	-0.233578
0.05715	0.7141	0.37958	-1.83799	-1.96727	-0.23755	-0.89536	0.14708	-2.25682	-0.06148		0.05715	-7.44032	3.45473	0.882004	2.37062	-2.6014	6.13868	-2.12638	3.52416	0.738044		0.05715	0.17236	-0.819664	0.350381	-0.154955	-1.30396	1.16576	1.27227	-1.187	-0.242575
0.0572	0.72805	0.38684	-1.85561	-1.93895	-0.22437	-0.89647	0.17394	-2.25148	-0.07803		0.0572	-6.08298	4.45323	-0.194509	2.1834	-2.86663	6.87196	-1.3775	2.46325	1.22169		0.0572	0.167385	-0.820963	0.346276	-0.159092	-1.29557	1.16556	1.27757	-1.18401	-0.251772
0.05725	0.74164	0.39391	-1.87287	-1.91087	-0.21113	-0.89731	0.20064	-2.24584	-0.09459		0.05725	-6.02057	3.62635	1.16283	3.27552	-3.47509	4.96856	-0.706632	1.55836	0.41041		0.05725	0.162317	-0.822361	0.342161	-0.163268	-1.28698	1.16546	1.28286	-1.1811	-0.261167
0.0573	0.75487	0.40078	-1.88978	-1.88302	-0.19784	-0.89786	0.22718	-2.23988	-0.11115		0.0573	-8.04879	3.50153	2.86341	5.0385	-2.66381	3.48641	-1.26829	1.82359	-0.525688		0.0573	0.157158	-0.823861	0.338038	-0.167483	-1.27818	1.16544	1.28813	-1.17827	-0.270758
0.05735	0.76775	0.40744	-1.90633	-1.85542	-0.1845	-0.89813	0.25353	-2.23362	-0.12772		0.05735	-9.37493	2.89307	2.801	4.04	0.300503	3.78284	-1.89236	1.69877	-2.66311		0.05735	0.151906	-0.825459	0.333909	-0.171735	-1.26918	1.16552	1.29339	-1.17554	-0.280546
0.0574	0.78025	0.41389	-1.92251	-1.82809	-0.17113	-0.89812	0.2797	-2.22706	-0.14429		0.0574	-8.09559	1.72295	2.23935	2.60465	1.59544	2.08226	-1.17468	1.38674	-3.28718		0.0574	0.146563	-0.827155	0.329778	-0.176022	-1.25998	1.16569	1.29863	-1.17289	-0.290529
0.05745	0.79238	0.42012	-1.93833	-1.80104	-0.15772	-0.89781	0.30568	-2.22019	-0.16087		0.05745	-10.4826	1.19249	2.27055	1.15369	-0.105139	-0.133172	-1.72074	2.57247	-1.649		0.05745	0.141125	-0.828947	0.325644	-0.180341	-1.25059	1.16594	1.30385	-1.17032	-0.300705
0.0575	0.80414	0.42612	-1.95378	-1.77427	-0.14429	-0.89722	0.33146	-2.21302	-0.17745		0.0575	-11.4655	1.36411	3.00383	0.389214	-2.33617	2.30068	-1.59592	2.8689	1.2841		0.0575	0.135594	-0.830833	0.32151	-0.184691	-1.241	1.16629	1.30905	-1.16784	-0.311072
0.05755	0.81552	0.4319	-1.96887	-1.74779	-0.13083	-0.89634	0.35703	-2.20556	-0.19403		0.05755	-7.95518	1.80096	3.26905	-0.266055	-3.28787	4.76574	-1.48671	2.60367	0.706841		0.05755	0.129967	-0.832812	0.317377	-0.189071	-1.23122	1.16671	1.31423	-1.16545	-0.321631
0.0576	0.82653	0.43743	-1.98358	-1.72162	-0.11737	-0.89516	0.38239	-2.19781	-0.21062		0.0576	-5.3497	2.31581	2.84781	-0.593689	-3.00704	5.74864	-0.909453	1.68317	-1.82062		0.0576	0.124243	-0.834885	0.313247	-0.193477	-1.22124	1.16723	1.31938	-1.16315	-0.332376
0.05765	0.83714	0.44273	-1.99791	-1.69577	-0.10389	-0.8937	0.40752	-2.18976	-0.22722		0.05765	-4.64763	3.08029	-0.459736	-0.0320301	-1.52489	5.53022	-0.410201	0.934294	-3.02195		0.05765	0.118422	-0.837049	0.309123	-0.197908	-1.21108	1.16782	1.3245	-1.16093	-0.343308
0.0577	0.84738	0.44778	-2.01187	-1.67024	-0.09042	-0.89194	0.43243	-2.18143	-0.24382		0.0577	-5.49012	1.66054	-3.20562	1.59054	-0.292359	5.29619	-0.254185	0.965497	-3.84883		0.0577	0.112503	-0.839304	0.305005	-0.202362	-1.20073	1.1685	1.3296	-1.15881	-0.354424
0.05775	0.85723	0.45257	-2.02546	-1.64506	-0.07694	-0.88989	0.4571	-2.17282	-0.26042		0.05775	-8.09559	0.0847761	-2.45674	1.52813	0.238096	4.03246	-1.97036	1.76118	-3.00635		0.05775	0.106487	-0.841651	0.300897	-0.206835	-1.1902	1.16925	1.33466	-1.15678	-0.365722
0.0578	0.86668	0.45711	-2.03866	-1.62022	-0.06348	-0.88754	0.48154	-2.16392	-0.27703		0.0578	-9.76497	2.76826	0.304743	-0.266055	-0.40157	2.73753	-4.49783	0.856286	-2.13266		0.0578	0.100375	-0.844088	0.296801	-0.211329	-1.17947	1.17008	1.3397	-1.15485	-0.377202
0.05785	0.87575	0.46138	-2.05148	-1.59573	-0.05004	-0.8849	0.50572	-2.15474	-0.29365		0.05785	-8.64165	4.01639	1.47487	-0.999331	-0.963229	0.303673	-3.03127	0.51305	-3.36518		0.05785	0.0941645	-0.846613	0.292717	-0.21584	-1.16857	1.17099	1.34469	-1.15301	-0.388861
0.0579	0.88442	0.46539	-2.06392	-1.57162	-0.03661	-0.88196	0.52965	-2.14529	-0.31027		0.0579	-6.86306	3.29871	1.24084	0.73245	-1.43128	-1.70894	-0.566217	3.8206	-6.90675		0.0579	0.087859	-0.849226	0.288648	-0.220368	-1.15748	1.17197	1.34965	-1.15127	-0.400699
0.05795	0.8927	0.46912	-2.07597	-1.54788	-0.02322	-0.87872	0.55332	-2.13556	-0.3269		0.05795	-5.67734	2.01938	0.445158	0.592035	-1.6497	-1.02247	-0.191778	8.70391	-7.3592		0.05795	0.0814576	-0.851923	0.284592	-0.224909	-1.14622	1.17303	1.35457	-1.14963	-0.412714
0.058	0.90058	0.47258	-2.08764	-1.52453	-0.00985	-0.87519	0.57672	-2.12557	-0.34353		0.058	-6.70705	2.76826	-1.0994	-0.172445	-0.713603	1.97305	0.0578477	8.6883	-2.91274		0.058	0.0749607	-0.854705	0.280553	-0.229462	-1.13478	1.17415	1.35946	-1.14809	-0.424903
0.05805	0.90806	0.47575	-2.09893	-1.50158	0.00347	-0.87137	0.59985	-2.11531	-0.36017		0.05805	-8.95368	3.65755	-2.84679	0.607637	-0.760408	2.40989	-1.79875	7.11254	-1.16535		0.05805	0.0683676	-0.857571	0.276528	-0.234023	-1.12316	1.17535	1.3643	-1.14665	-0.437264
0.0581	0.91515	0.47864	-2.10982	-1.47903	0.01675	-0.86725	0.62269	-2.10479	-0.37682		0.0581	-9.59335	3.08029	-2.50355	2.29261	-0.900822	-0.226782	-3.53053	5.39636	-1.88303		0.0581	0.0616788	-0.860518	0.272521	-0.238591	-1.11137	1.17662	1.36909	-1.1453	-0.449793
0.05815	0.92184	0.48123	-2.12033	-1.4569	0.02998	-0.86284	0.64526	-2.094	-0.39347		0.05815	-7.83036	3.2207	-2.81558	0.701246	0.737349	-1.88055	-2.51642	2.12002	-2.85033		0.05815	0.0548932	-0.863545	0.26853	-0.243163	-1.09942	1.17795	1.37384	-1.14406	-0.462488
0.0582	0.92813	0.48353	-2.13046	-1.43519	0.04315	-0.85813	0.66753	-2.08296	-0.41013		0.0582	-5.2873	2.79946	-3.75168	-0.79651	3.37402	-1.56852	-0.956258	-2.26404	-1.77382		0.0582	0.0480122	-0.86665	0.264557	-0.247737	-1.0873	1.17935	1.37855	-1.14292	-0.475347
0.05825	0.93402	0.48553	-2.14019	-1.41392	0.05626	-0.85313	0.68951	-2.07167	-0.42679		0.05825	-3.66473	2.2378	-3.79848	0.123986	1.62664	0.771722	-0.581819	-6.52328	1.83016		0.05825	0.041036	-0.869833	0.260604	-0.25231	-1.07502	1.1808	1.3832	-1.14188	-0.488367
0.0583	0.93951	0.48723	-2.14954	-1.39308	0.0693	-0.84784	0.71118	-2.06012	-0.44346		0.0583	-3.10307	3.98518	-1.95749	-0.780908	0.300503	-0.195579	-1.26829	-5.41557	0.675638		0.0583	0.0339641	-0.873092	0.256673	-0.256881	-1.06258	1.18232	1.38781	-1.14095	-0.501545
0.05835	0.94461	0.48862	-2.1585	-1.3727	0.08227	-0.84226	0.73255	-2.04833	-0.46014		0.05835	-4.64763	4.98369	-2.61276	-0.671697	2.57834	-3.11308	-1.81435	-2.62288	-2.80353		0.05835	0.0267976	-0.876426	0.252765	-0.261446	-1.04998	1.1839	1.39236	-1.14013	-0.514882
0.0584	0.9493	0.4897	-2.16706	-1.35277	0.09517	-0.83639	0.7536	-2.0363	-0.47682		0.0584	-6.42622	2.95548	-2.84679	0.560832	3.53004	-3.93997	-2.76605	-2.46686	-2.22627		0.0584	0.0195376	-0.879834	0.248881	-0.266005	-1.03723	1.18552	1.39686	-1.13942	-0.528376
0.05845	0.9536	0.49046	-2.17525	-1.33331	0.10798	-0.83024	0.77434	-2.02402	-0.49351		0.05845	-6.72265	1.11448	-2.40994	0.857263	2.07909	-3.39391	-3.15609	-3.29375	-0.74411		0.05845	0.0121849	-0.883314	0.245023	-0.270556	-1.02431	1.1872	1.40131	-1.13881	-0.542023
0.0585	0.95751	0.49091	-2.18304	-1.31433	0.1207	-0.82379	0.79475	-2.01151	-0.51021		0.0585	-7.44032	1.02087	-4.46935	0.201994	2.04789	-0.382798	-5.1843	-3.41856	0.145183		0.0585	0.00474089	-0.886868	0.241191	-0.275095	-1.01125	1.18893	1.4057	-1.13832	-0.555824
0.05855	0.96101	0.49104	-2.19044	-1.29583	0.13333	-0.81707	0.81484	-1.99876	-0.52691		0.05855	-7.34671	2.92427	-4.26653	0.108385	2.48473	2.19147	-5.05949	0.51305	-0.369671		0.05855	-0.00279422	-0.890494	0.237389	-0.279622	-0.998037	1.1907	1.41004	-1.13794	-0.569773
0.0586	0.96413	0.49084	-2.19746	-1.27782	0.14586	-0.81006	0.8346	-1.98578	-0.54361		0.0586	-5.52132	3.1895	-3.9077	-0.827713	3.51444	1.28658	-2.45401	2.75968	-0.276061		0.0586	-0.0104194	-0.894192	0.233616	-0.284133	-0.984673	1.19252	1.41431	-1.13767	-0.58387
0.05865	0.96685	0.49032	-2.20409	-1.2603	0.15828	-0.80277	0.85402	-1.97258	-0.56032		0.05865	-5.13128	1.89457	-3.54886	-3.12115	2.2195	1.31778	-1.3151	1.44915	0.628833		0.05865	-0.0181344	-0.897963	0.229876	-0.288628	-0.971167	1.19438	1.41851	-1.13752	-0.598112
0.0587	0.96918	0.48948	-2.21034	-1.24329	0.1706	-0.7952	0.8731	-1.95915	-0.57704		0.0587	-6.37941	0.303199	-2.67517	-3.30837	1.98548	0.631307	-0.800242	-1.39035	2.14219		0.0587	-0.0259377	-0.901805	0.226171	-0.293105	-0.957517	1.19627	1.42266	-1.13748	-0.612494
0.05875	0.97112	0.4883	-2.2162	-1.22679	0.18281	-0.78736	0.89184	-1.94551	-0.59375		0.05875	-7.90837	0.287597	-0.225712	-1.32697	5.49585	0.27247	-0.597421	-1.70238	1.03448		0.05875	-0.033828	-0.905717	0.222503	-0.297562	-0.94373	1.19821	1.42673	-1.13755	-0.627012
0.0588	0.97267	0.48678	-2.22167	-1.21081	0.1949	-0.77924	0.91023	-1.93164	-0.61048		0.0588	-7.56514	1.13009	1.20964	-1.88862	8.42895	0.927738	1.94564	-1.24993	-0.369671		0.0588	-0.0418041	-0.9097	0.218872	-0.301999	-0.929806	1.20017	1.43073	-1.13773	-0.641664
0.05885	0.97385	0.48494	-2.22677	-1.19536	0.20687	-0.77086	0.92826	-1.91757	-0.6272		0.05885	-5.3497	2.40942	2.27055	-3.10555	8.00771	0.631307	3.4746	-0.875495	-2.24187		0.05885	-0.0498653	-0.913751	0.21528	-0.306413	-0.915749	1.20217	1.43466	-1.13804	-0.656446
0.0589	0.97464	0.48276	-2.23148	-1.18044	0.21871	-0.76221	0.94594	-1.90328	-0.64393		0.0589	-6.16099	2.67465	2.06773	-2.49709	6.27593	1.39579	3.10017	-2.37325	-2.35108		0.0589	-0.0580107	-0.91787	0.211725	-0.310803	-0.901561	1.20419	1.43852	-1.13846	-0.671353
0.05895	0.97505	0.48024	-2.23581	-1.16605	0.23042	-0.75329	0.96327	-1.88879	-0.66067		0.05895	-7.2375	1.86336	1.74009	-1.24896	3.37402	1.02135	1.60241	-3.41856	-2.97514		0.05895	-0.0662386	-0.922059	0.208209	-0.315168	-0.887246	1.20623	1.4423	-1.13899	-0.686384
0.059	0.97509	0.47738	-2.23977	-1.15221	0.24199	-0.74411	0.98023	-1.87409	-0.6774		0.059	-7.53393	2.84626	-1.62986	-0.952526	0.799755	0.444088	-0.956258	-0.73508	-0.759712		0.059	-0.0745488	-0.926317	0.204735	-0.319505	-0.872805	1.2083	1.446	-1.13964	-0.701536
0.05905	0.97475	0.47417	-2.24334	-1.13892	0.25343	-0.73467	0.99682	-1.8592	-0.69413		0.05905	-8.07999	3.93838	-3.17442	0.685645	0.0352753	3.75163	-3.82696	-0.298234	2.31381		0.05905	-0.0829415	-0.93064	0.201303	-0.323811	-0.858242	1.21037	1.44963	-1.14041	-0.716807
0.0591	0.97405	0.47063	-2.24654	-1.12619	0.26472	-0.72498	1.01305	-1.84411	-0.71087		0.0591	-7.54953	3.2051	-2.70637	0.498425	1.67345	5.60823	-2.70364	-0.563462	2.70385		0.0591	-0.091414	-0.935032	0.197916	-0.328084	-0.84356	1.21246	1.45318	-1.14129	-0.732193
0.05915	0.97298	0.46675	-2.24937	-1.11401	0.27586	-0.71504	1.0289	-1.82884	-0.72761		0.05915	-4.71004	1.80096	-0.709362	-0.671697	4.31012	3.61122	-2.25119	2.46325	3.62435		0.05915	-0.0999646	-0.939492	0.194577	-0.332325	-0.828758	1.21455	1.45665	-1.14229	-0.747691
0.0592	0.97156	0.46252	-2.25182	-1.1024	0.28686	-0.70484	1.04438	-1.81337	-0.74434		0.0592	-0.669216	0.381207	-0.553346	-1.40497	6.68157	3.4084	-1.72074	4.44466	4.09239		0.0592	-0.108591	-0.94402	0.191286	-0.336533	-0.813839	1.21664	1.46003	-1.14341	-0.763295
0.05925	0.96977	0.45794	-2.25391	-1.09137	0.29769	-0.69441	1.05949	-1.79772	-0.76107		0.05925	2.04547	-0.960533	-0.00728908	-2.6219	5.44904	3.98566	-0.0357621	3.29014	4.51364		0.05925	-0.117292	-0.948614	0.188046	-0.340706	-0.798802	1.21872	1.46333	-1.14464	-0.779003
0.0593	0.96764	0.45303	-2.25563	-1.0809	0.30837	-0.68373	1.07421	-1.78189	-0.7778		0.0593	2.45111	-0.430078	-0.163305	-1.38937	2.92158	1.28658	-1.06547	0.575457	4.24841		0.0593	-0.126066	-0.953274	0.184858	-0.344845	-0.783653	1.2208	1.46654	-1.146	-0.794811
0.05935	0.96515	0.44777	-2.25698	-1.07102	0.31889	-0.67282	1.08856	-1.76588	-0.79453		0.05935	-0.965647	2.59664	-0.459736	-0.905721	2.01668	-1.81815	-3.65534	-0.501056	2.45422		0.05935	-0.134911	-0.957999	0.181723	-0.348948	-0.76839	1.22287	1.46965	-1.14747	-0.810714
0.0594	0.96233	0.44216	-2.25796	-1.06172	0.32923	-0.66167	1.10252	-1.7497	-0.81125		0.0594	-3.85195	2.33141	0.897605	-2.90273	3.54564	-1.3189	-2.57883	-0.766283	0.816053		0.0594	-0.143824	-0.96279	0.178643	-0.353014	-0.753016	1.22493	1.47268	-1.14905	-0.826707
0.05945	0.95916	0.43621	-2.25859	-1.05301	0.33941	-0.6503	1.11609	-1.73335	-0.82797		0.05945	-5.72414	1.16129	1.33445	-2.21626	3.07759	-0.00835935	-1.11227	0.0450013	2.12659		0.05945	-0.152805	-0.967643	0.17562	-0.357042	-0.737531	1.22696	1.4756	-1.15075	-0.842787
0.0595	0.95566	0.42992	-2.25886	-1.04489	0.34942	-0.6387	1.12928	-1.71683	-0.84468		0.0595	-6.95667	1.59813	1.44366	0.170791	3.93568	0.724917	-1.09667	-0.859893	4.09239		0.0595	-0.161853	-0.972558	0.172658	-0.36103	-0.72194	1.22898	1.47843	-1.15257	-0.858951
0.05955	0.95184	0.42329	-2.25877	-1.03737	0.35925	-0.62688	1.14209	-1.70015	-0.86138		0.05955	-9.49974	1.2237	4.14274	-0.7029	3.74846	0.865332	-1.28389	-2.15483	4.37322		0.05955	-0.170964	-0.977532	0.169756	-0.364974	-0.706245	1.23096	1.48116	-1.1545	-0.875194
0.0596	0.94769	0.41631	-2.25832	-1.03044	0.3689	-0.61485	1.1545	-1.68332	-0.87807		0.0596	-10.4514	0.802451	3.14424	-2.45028	2.64075	-2.97267	-1.97036	0.107408	3.54634		0.0596	-0.18014	-0.982567	0.16692	-0.368875	-0.690445	1.23292	1.48378	-1.15654	-0.891514
0.05965	0.94323	0.40899	-2.25753	-1.02412	0.37836	-0.60261	1.16652	-1.66633	-0.89475		0.05965	-8.82887	1.19249	0.928809	-2.52829	4.35693	-5.42212	-1.92356	2.54126	2.01738		0.05965	-0.189374	-0.987658	0.164148	-0.372732	-0.674547	1.23484	1.48629	-1.15869	-0.907906
0.0597	0.93845	0.40134	-2.25639	-1.0184	0.38764	-0.59016	1.17815	-1.64919	-0.91142		0.0597	-8.40762	2.40942	-0.678159	-2.13825	6.40074	-3.2379	-3.01567	0.778278	2.34501		0.0597	-0.198667	-0.992804	0.161444	-0.376544	-0.65855	1.23673	1.4887	-1.16096	-0.924366
0.05975	0.93337	0.39334	-2.2549	-1.01329	0.39673	-0.57751	1.18939	-1.6319	-0.92808		0.05975	-5.70854	2.69025	-1.78587	-2.01344	7.36804	-0.289189	-3.96737	-1.42155	4.56044		0.05975	-0.208018	-0.998004	0.158808	-0.380311	-0.64246	1.23857	1.49099	-1.16334	-0.940891
0.0598	0.928	0.38501	-2.25307	-1.00878	0.40563	-0.56466	1.20024	-1.61447	-0.94472		0.0598	-0.918842	3.09589	-2.44114	-0.921323	8.42895	0.303673	-4.31061	-2.8881	7.07231		0.0598	-0.217423	-1.00326	0.156242	-0.384033	-0.62628	1.24038	1.49317	-1.16583	-0.957475
0.05985	0.92233	0.37635	-2.2509	-1.00489	0.41434	-0.55162	1.21069	-1.5969	-0.96134		0.05985	0.672524	6.48144	-2.45674	-0.780908	8.81899	0.100852	-3.56173	-2.43566	6.88509		0.05985	-0.226882	-1.00856	0.153748	-0.387706	-0.610014	1.24214	1.49523	-1.16843	-0.974116
0.0599	0.91637	0.36735	-2.24839	-1.00161	0.42285	-0.53839	1.22075	-1.5792	-0.97794		0.0599	-2.12017	6.88709	-1.55185	-1.24896	6.69717	1.23977	-3.46812	0.887489	3.98318		0.0599	-0.236395	-1.01392	0.151326	-0.39133	-0.593664	1.24385	1.49717	-1.17115	-0.990811
0.05995	0.91014	0.35802	-2.24555	-0.99894	0.43116	-0.52498	1.23041	-1.56136	-0.99453		0.05995	-7.15949	4.01639	-0.30372	-2.76232	0.721747	-0.0551642	-3.99858	3.35255	4.43563		0.05995	-0.245959	-1.01932	0.148979	-0.394903	-0.577234	1.2455	1.49898	-1.17398	-1.00755
0.06	0.90363	0.34836	-2.24238	-0.99689	0.43926	-0.5114	1.23969	-1.5434	-1.01109		0.06	-9.1565	-0.196053	0.616776	-3.79202	-0.292359	0.350478	-5.32471	3.22773	4.63845		0.06	-0.255574	-1.02476	0.146709	-0.398424	-0.560723	1.24711	1.50067	-1.17692	-1.02434
0.06005	0.89686	0.33838	-2.23888	-0.99546	0.44717	-0.49765	1.24856	-1.52532	-1.02763		0.06005	-7.1751	-2.02144	-2.0667	-2.99634	1.54863	0.678112	-6.51044	1.9796	5.40293		0.06005	-0.265239	-1.03025	0.144519	-0.401894	-0.544136	1.24865	1.50223	-1.17998	-1.04116
0.0601	0.88983	0.32808	-2.23505	-0.99464	0.45486	-0.48372	1.25704	-1.50711	-1.04415		0.0601	-7.86157	0.350004	-4.37575	-1.40497	3.1556	0.802925	-3.67094	1.30873	6.21422		0.0601	-0.274953	-1.03577	0.142408	-0.405313	-0.527473	1.25013	1.50367	-1.18315	-1.05803
0.06015	0.88255	0.31746	-2.23091	-0.99444	0.46235	-0.46964	1.26513	-1.48879	-1.06063		0.06015	-9.34372	1.92577	-4.18853	-0.936925	5.059	2.20707	-2.3448	0.903091	7.54035		0.06015	-0.284717	-1.04133	0.140378	-0.40868	-0.510737	1.25156	1.50497	-1.18643	-1.07493
0.0602	0.87503	0.30652	-2.22645	-0.99485	0.46963	-0.4554	1.27283	-1.47035	-1.07709		0.0602	-9.32812	2.15979	-0.631354	-2.73111	6.74398	2.14467	-3.45252	-1.43715	6.46384		0.0602	-0.294531	-1.04692	0.138431	-0.411997	-0.49393	1.25291	1.50615	-1.18983	-1.09186
0.06025	0.86727	0.29527	-2.22167	-0.99589	0.4767	-0.44102	1.28014	-1.45181	-1.09351		0.06025	-9.32812	2.15979	-0.194509	-2.98074	7.46165	0.958942	-5.1999	-4.29225	5.69936		0.06025	-0.304395	-1.05254	0.136566	-0.415262	-0.477055	1.2542	1.5072	-1.19334	-1.10882
0.0603	0.85929	0.28371	-2.21659	-0.99754	0.48355	-0.42649	1.28705	-1.43317	-1.1099		0.0603	-8.45443	1.00527	-1.94189	-1.17095	9.16223	1.42699	-6.1516	-6.03963	6.72907		0.0603	-0.314308	-1.05819	0.134785	-0.418476	-0.460116	1.25541	1.50811	-1.19695	-1.1258
0.06035	0.85109	0.27184	-2.21119	-0.99981	0.49019	-0.41182	1.29358	-1.41442	-1.12626		0.06035	-7.78356	0.740045	-2.75318	-1.35817	8.33534	0.724917	-6.35442	-6.6481	7.60276		0.06035	-0.32427	-1.06386	0.13309	-0.421635	-0.443114	1.25655	1.5089	-1.20067	-1.14281
0.0604	0.84267	0.25967	-2.2055	-1.00269	0.49661	-0.39702	1.29971	-1.39558	-1.14257		0.0604	-5.03767	2.72145	-1.84828	-1.82622	7.18082	0.834129	-8.11741	-6.14885	4.63845		0.0604	-0.334281	-1.06954	0.131484	-0.42474	-0.426054	1.25762	1.50955	-1.2045	-1.15983
0.06045	0.83405	0.24721	-2.1995	-1.00619	0.50281	-0.38209	1.30546	-1.37664	-1.15885		0.06045	-5.70854	3.23631	-1.45824	-1.639	5.9795	-0.335994	-7.50894	-5.7276	2.53223		0.06045	-0.34434	-1.07524	0.12997	-0.427789	-0.408935	1.25861	1.51006	-1.20843	-1.17687
0.0605	0.82523	0.23445	-2.19321	-1.0103	0.50879	-0.36704	1.31083	-1.35762	-1.17508		0.0605	-6.41062	2.83066	-1.80148	-2.01344	4.34132	-2.09898	-4.95028	-6.94453	3.70235		0.0605	-0.354447	-1.08095	0.12855	-0.43078	-0.391764	1.25951	1.51044	-1.21246	-1.19391
0.06055	0.81623	0.2214	-2.18662	-1.01502	0.51455	-0.35187	1.31581	-1.33851	-1.19126		0.06055	-5.61493	0.584028	-2.62836	-1.77941	2.70315	-2.67624	-4.70065	-8.19266	6.16741		0.06055	-0.364602	-1.08667	0.127226	-0.433714	-0.374539	1.26033	1.51067	-1.2166	-1.21097
0.0606	0.80705	0.20806	-2.17975	-1.02036	0.52009	-0.33659	1.32041	-1.31932	-1.2074		0.0606	-5.24049	-0.0868418	-3.86089	-1.81062	0.456519	-1.17848	-3.00007	-9.06635	7.54035		0.0606	-0.374808	-1.09239	0.126	-0.436587	-0.357266	1.26106	1.51076	-1.22083	-1.22802
0.06065	0.7977	0.19445	-2.17259	-1.0263	0.5254	-0.32122	1.32462	-1.30005	-1.22348		0.06065	-7.09709	2.75265	-2.53475	-4.41609	-0.214351	-0.538815	-3.92057	-9.47199	8.67927		0.06065	-0.38506	-1.09811	0.124873	-0.439399	-0.339949	1.2617	1.5107	-1.22516	-1.24507
0.0607	0.78819	0.18056	-2.16515	-1.03284	0.53049	-0.30574	1.32846	-1.28071	-1.23951		0.0607	-9.21891	4.00078	-1.20861	-6.58471	1.47063	-0.804042	-6.26081	-9.5188	9.25653		0.0607	-0.395362	-1.10383	0.123849	-0.442151	-0.322591	1.26224	1.5105	-1.22958	-1.26213
0.06075	0.77852	0.16641	-2.15743	-1.03999	0.53536	-0.29017	1.33193	-1.26131	-1.25549		0.06075	-8.29841	3.40792	-2.65957	-5.39899	3.90448	0.210063	-7.25932	-8.48909	7.71197		0.06075	-0.405712	-1.10955	0.122929	-0.44484	-0.305196	1.26269	1.51015	-1.2341	-1.27917
0.0608	0.76871	0.15198	-2.14944	-1.04773	0.53999	-0.27451	1.33502	-1.24183	-1.2714		0.0608	-8.50123	2.53423	-2.83118	-3.80762	3.71726	1.14616	-4.88787	-7.28776	5.96459		0.0608	-0.41611	-1.11526	0.122116	-0.447467	-0.287768	1.26303	1.50966	-1.23872	-1.29621
0.06085	0.75877	0.1373	-2.14118	-1.05607	0.5444	-0.25878	1.33774	-1.2223	-1.28725		0.06085	-10.7635	1.08328	-2.0355	-3.5736	3.71726	-0.211181	-1.70514	-6.72611	4.40443		0.06085	-0.426552	-1.12095	0.121414	-0.45003	-0.270307	1.26328	1.50901	-1.24342	-1.31324
0.0609	0.7487	0.12236	-2.13265	-1.06501	0.54859	-0.24296	1.34009	-1.20271	-1.30304		0.0609	-10.6543	0.771248	-3.04961	-2.79352	5.38663	-0.97566	-0.69103	-6.11764	3.31231		0.0609	-0.43704	-1.12664	0.120821	-0.452528	-0.252817	1.26342	1.50822	-1.24822	-1.33024
0.06095	0.73851	0.10718	-2.12387	-1.07453	0.55254	-0.22709	1.34208	-1.18307	-1.31876		0.06095	-9.48414	2.79946	-5.8423	-0.21925	5.059	1.22417	-2.89086	-8.67631	4.43563		0.06095	-0.447572	-1.13231	0.120341	-0.454961	-0.235301	1.26346	1.50727	-1.25311	-1.34723
0.061	0.72822	0.09175	-2.11482	-1.08464	0.55626	-0.21115	1.3437	-1.16337	-1.3344		0.061	-8.39202	5.32692	-6.98122	0.186393	4.41933	2.37869	-3.43692	-10.7669	7.07231		0.061	-0.458145	-1.13796	0.119972	-0.457329	-0.217761	1.26339	1.50618	-1.25808	-1.36419
0.06105	0.71783	0.07609	-2.10552	-1.09533	0.55976	-0.19515	1.34496	-1.14364	-1.34997		0.06105	-7.31551	5.59215	-4.65657	-1.42058	6.40074	1.98865	-1.54912	-10.1117	6.69787		0.06105	-0.46876	-1.14359	0.119716	-0.459631	-0.200203	1.26322	1.50493	-1.26314	-1.38112
0.0611	0.70735	0.0602	-2.09597	-1.10659	0.56303	-0.1791	1.34587	-1.12386	-1.36546		0.0611	-7.15949	3.1739	-4.62537	-2.51269	6.9468	-0.101969	-0.956258	-8.44228	4.06119		0.0611	-0.479415	-1.1492	0.119574	-0.461865	-0.182629	1.26294	1.50354	-1.26828	-1.39802
0.06115	0.69679	0.04408	-2.08617	-1.11842	0.56606	-0.16301	1.34643	-1.10404	-1.38087		0.06115	-7.62754	3.65755	-4.98421	-5.477	5.44904	-0.0551642	-2.03277	-5.712	1.22169		0.06115	-0.49011	-1.15479	0.119546	-0.464029	-0.165045	1.26255	1.50201	-1.27351	-1.41489
0.0612	0.68616	0.02774	-2.07613	-1.13082	0.56887	-0.14688	1.34663	-1.08419	-1.3962		0.0612	-9.79617	2.61224	-5.93591	-7.31799	1.89187	1.38019	-1.79875	-3.68379	-0.104444		0.0612	-0.500841	-1.16034	0.119633	-0.466121	-0.147453	1.26204	1.50032	-1.27882	-1.43171
0.06125	0.67547	0.0112	-2.06586	-1.14378	0.57145	-0.13072	1.34649	-1.06431	-1.41144		0.06125	-11.6372	0.209589	-5.8423	-4.35368	-0.151944	-1.10047	-1.12788	-5.93042	0.269996		0.06125	-0.511606	-1.16587	0.119838	-0.468139	-0.129858	1.26143	1.4985	-1.28422	-1.44849
0.0613	0.66473	-0.00556	-2.05534	-1.1573	0.5738	-0.11453	1.34601	-1.0444	-1.42658		0.0613	-11.7308	0.771248	-3.89209	-2.69991	-1.32207	-0.928855	-2.92206	-8.08345	1.75215		0.0613	-0.522404	-1.17136	0.120161	-0.470083	-0.112261	1.26069	1.49652	-1.2897	-1.46523
0.06135	0.65394	-0.02251	-2.0446	-1.17136	0.57591	-0.09832	1.34519	-1.02448	-1.44163		0.06135	-9.46853	0.615232	-3.14322	-1.09294	-0.276757	2.4723	-3.43692	-6.81972	6.55745		0.06135	-0.53323	-1.17682	0.120603	-0.471951	-0.0946667	1.25984	1.49441	-1.29526	-1.48191
0.0614	0.64313	-0.03965	-2.03364	-1.18597	0.5778	-0.0821	1.34403	-1.00453	-1.45658		0.0614	-9.45293	-0.461281	-4.59417	0.763653	0.0820802	3.00276	-2.57883	-5.55598	6.43264		0.0614	-0.544085	-1.18223	0.121163	-0.473743	-0.0770797	1.25886	1.49214	-1.3009	-1.49855
0.06145	0.63229	-0.05698	-2.02245	-1.20111	0.57946	-0.06587	1.34254	-0.98457	-1.47143		0.06145	-9.59335	-1.35057	-6.06072	1.2005	-0.229952	2.65952	-3.65534	-6.28926	4.79447		0.06145	-0.554967	-1.18761	0.121843	-0.475456	-0.0595041	1.25777	1.48974	-1.30661	-1.51512
0.0615	0.62144	-0.07448	-2.01104	-1.21679	0.58089	-0.04964	1.34073	-0.96461	-1.48618		0.0615	-11.6216	0.802451	-5.57707	-0.515681	-1.25966	2.67512	-3.17169	-6.78851	5.93339		0.0615	-0.565873	-1.19294	0.122643	-0.477091	-0.0419415	1.25655	1.48719	-1.31241	-1.53165
0.06155	0.61059	-0.09216	-1.99941	-1.23299	0.5821	-0.03341	1.3386	-0.94463	-1.50081		0.06155	-12.6825	4.53124	-3.62687	-1.26456	-2.50779	2.03545	-0.581819	-6.6637	5.76177		0.06155	-0.576802	-1.19823	0.123565	-0.478646	-0.0243975	1.25521	1.48449	-1.31827	-1.54811
0.0616	0.59974	-0.10999	-1.98758	-1.2497	0.58307	-0.01719	1.33614	-0.92466	-1.51533		0.0616	-10.9351	7.0587	-2.67517	-0.765307	-1.11925	0.974543	1.35278	-8.20826	4.01439		0.0616	-0.587752	-1.20347	0.12461	-0.480121	-0.00687608	1.25375	1.48165	-1.32421	-1.5645
0.06165	0.58891	-0.12799	-1.97554	-1.26692	0.58382	-0.000981712	1.33337	-0.90468	-1.52973		0.06165	-10.8415	4.95248	-4.17292	0.467222	-1.43128	2.22267	0.931539	-7.74021	1.98617		0.06165	-0.598721	-1.20865	0.125779	-0.481515	0.0106217	1.25216	1.47867	-1.33021	-1.58083
0.0617	0.5781	-0.14613	-1.9633	-1.28465	0.58434	0.0152	1.3303	-0.88471	-1.54402		0.0617	-9.79617	1.3017	-5.06222	-0.515681	-0.463977	4.29769	0.354279	-4.44827	0.441613		0.0617	-0.609707	-1.21378	0.127072	-0.482827	0.0280908	1.25045	1.47553	-1.33628	-1.5971
0.06175	0.56733	-0.16441	-1.95086	-1.30287	0.58464	0.03136	1.32691	-0.86476	-1.55817		0.06175	-7.42472	1.75415	-2.0355	-1.06174	0.768552	4.78134	0.993945	-4.68229	0.348004		0.06175	-0.620707	-1.21885	0.12849	-0.484056	0.0455284	1.24862	1.47226	-1.34241	-1.61329
0.0618	0.55661	-0.18283	-1.93823	-1.32157	0.58471	0.04748	1.32323	-0.84481	-1.5722		0.0618	-8.81327	2.62784	-1.45824	-2.10705	0.144487	3.22118	0.385482	-7.39698	0.535223		0.0618	-0.631719	-1.22387	0.130032	-0.485203	0.0629304	1.24667	1.46884	-1.34861	-1.62941
0.06185	0.54594	-0.20138	-1.92541	-1.34075	0.58456	0.06357	1.31925	-0.82488	-1.5861		0.06185	-9.1253	1.70735	-2.956	-3.69841	0.00407203	3.56441	-1.98597	-8.89473	2.2358		0.06185	-0.642742	-1.22881	0.131699	-0.486264	0.0802932	1.24459	1.46528	-1.35486	-1.64545
0.0619	0.53533	-0.22004	-1.9124	-1.36041	0.58418	0.07961	1.31499	-0.80498	-1.59986		0.0619	-8.39202	1.98817	-2.55035	-2.74671	0.893365	3.29919	-2.51642	-8.75432	2.64144		0.0619	-0.653773	-1.2337	0.13349	-0.487242	0.0976143	1.24238	1.46157	-1.36117	-1.66142
0.06195	0.5248	-0.23881	-1.89921	-1.38052	0.58358	0.0956	1.31043	-0.78509	-1.61347		0.06195	-7.2375	2.01938	-1.67666	-0.749705	0.347308	0.225665	-2.81285	-7.94303	1.81456		0.06195	-0.66481	-1.23851	0.135407	-0.488135	0.114892	1.24004	1.45773	-1.36753	-1.67731
0.062	0.51435	-0.25769	-1.88584	-1.40108	0.58276	0.11154	1.3056	-0.76524	-1.62695		0.062	-6.55103	0.880459	-0.615753	-0.98373	-0.729205	-0.538815	-2.67244	-6.77291	0.223191		0.062	-0.675852	-1.24326	0.13745	-0.488942	0.132124	1.23758	1.45374	-1.37395	-1.69313
0.06205	0.50399	-0.27666	-1.87229	-1.42209	0.58173	0.12741	1.30048	-0.74542	-1.64027		0.06205	-7.11269	0.724443	1.20964	-2.5751	-2.25816	0.693714	-2.54762	-4.7603	0.800451		0.06205	-0.686896	-1.24793	0.139619	-0.489665	0.149307	1.23498	1.44961	-1.38042	-1.70886
0.0621	0.49373	-0.29572	-1.85858	-1.44353	0.58047	0.14322	1.2951	-0.72564	-1.65344		0.0621	-8.84447	3.62635	0.0707191	-2.79352	-3.64671	3.50201	-2.09518	-4.38586	1.83016		0.0621	-0.69794	-1.25253	0.141912	-0.490303	0.166441	1.23226	1.44534	-1.38694	-1.7245
0.06215	0.48359	-0.31485	-1.84469	-1.46539	0.57899	0.15896	1.28946	-0.70589	-1.66646		0.06215	-10.4982	5.56095	-2.44114	-1.18655	-3.45949	3.97006	-1.15908	-4.24545	1.62734		0.06215	-0.708982	-1.25705	0.144329	-0.490856	0.183523	1.2294	1.44094	-1.39351	-1.74007
0.0622	0.47357	-0.33406	-1.83065	-1.48767	0.5773	0.17462	1.28355	-0.6862	-1.67931		0.0622	-8.71966	3.64195	-3.09641	0.233198	-3.10065	4.45371	0.853531	-7.30337	2.87547		0.0622	-0.720022	-1.26149	0.146869	-0.491325	0.20055	1.22642	1.43641	-1.40012	-1.75554
0.06225	0.46367	-0.35333	-1.81645	-1.51035	0.5754	0.1902	1.27738	-0.66654	-1.692		0.06225	-8.53244	1.69174	-1.84828	0.233198	-1.6809	5.20258	2.69452	-9.62801	2.32941		0.06225	-0.73106	-1.26585	0.149529	-0.491709	0.217523	1.2233	1.43174	-1.40676	-1.77093
0.0623	0.45392	-0.37266	-1.80209	-1.53343	0.57328	0.20569	1.27097	-0.64694	-1.70452		0.0623	-9.03169	-1.21016	-0.97459	-1.03053	-1.55609	4.4069	2.66332	-6.16445	-1.30577		0.0623	-0.742093	-1.27013	0.152307	-0.492011	0.234438	1.22005	1.42693	-1.41345	-1.78622
0.06235	0.44431	-0.39203	-1.78758	-1.55689	0.57095	0.22108	1.26431	-0.6274	-1.71687		0.06235	-8.51684	-0.92933	-1.19301	-1.6858	-2.44538	5.40541	1.22797	-3.98022	-2.81913		0.06235	-0.753122	-1.27432	0.155202	-0.492228	0.251293	1.21666	1.422	-1.42018	-1.80142
0.0624	0.43487	-0.41145	-1.77292	-1.58072	0.56841	0.23638	1.25742	-0.60791	-1.72903		0.0624	-7.97078	0.193988	-1.23982	-0.827713	-2.30497	4.64093	0.401084	-5.21275	-1.38378		0.0624	-0.764145	-1.27843	0.158213	-0.492364	0.268084	1.21314	1.41693	-1.42694	-1.81653
0.06245	0.42558	-0.43089	-1.75812	-1.60492	0.56566	0.25158	1.25029	-0.58849	-1.74102		0.06245	-8.96928	-0.554891	0.335947	-0.281656	-2.66381	2.94035	-0.987461	-7.08494	0.0515727		0.06245	-0.775158	-1.28245	0.16134	-0.492416	0.284809	1.20948	1.41174	-1.43373	-1.83154
0.0625	0.41648	-0.45036	-1.74318	-1.62947	0.56271	0.26667	1.24293	-0.56914	-1.75282		0.0625	-8.37642	0.755646	1.06922	0.841661	-3.5531	1.97305	-2.11078	-6.47648	-0.276061		0.0625	-0.786161	-1.28637	0.16458	-0.492383	0.301468	1.20568	1.40642	-1.44056	-1.84645
0.06255	0.40755	-0.46984	-1.7281	-1.65436	0.55955	0.28164	1.23535	-0.54985	-1.76443		0.06255	-6.3014	1.97257	0.772792	1.15369	-3.28787	2.06666	-3.06248	-5.79001	-0.650501		0.06255	-0.797153	-1.2902	0.167932	-0.492268	0.318055	1.20174	1.40097	-1.44741	-1.86126
0.0626	0.39882	-0.48933	-1.71289	-1.67958	0.55619	0.2965	1.22755	-0.53064	-1.77584		0.0626	-4.46041	5.23331	0.710386	0.872864	-3.70912	3.03396	-3.67094	-6.88212	0.59763		0.0626	-0.808133	-1.29392	0.171394	-0.492072	0.33457	1.19766	1.3954	-1.45429	-1.87597
0.06265	0.39029	-0.50881	-1.69755	-1.70512	0.55262	0.31124	1.21954	-0.5115	-1.78706		0.06265	-7.15949	8.49405	0.101922	1.66855	-2.617	3.86084	-2.90646	-7.44378	2.39182		0.06265	-0.8191	-1.29754	0.174964	-0.491794	0.351007	1.19343	1.3897	-1.4612	-1.89058
0.0627	0.38198	-0.52829	-1.68209	-1.73096	0.54886	0.32585	1.21133	-0.49245	-1.79807		0.0627	-10.8727	7.13671	0.55437	1.84017	-1.94613	3.06516	-3.2497	-9.05075	2.87547		0.0627	-0.830051	-1.30105	0.17864	-0.491437	0.367365	1.18906	1.38389	-1.46813	-1.90509
0.06275	0.37387	-0.54775	-1.6665	-1.7571	0.54489	0.34033	1.20291	-0.47348	-1.80888		0.06275	-11.2003	3.57954	0.507565	1.76216	-3.95874	4.60972	-3.65534	-10.4861	3.90518		0.06275	-0.840985	-1.30445	0.182421	-0.491002	0.383642	1.18455	1.37795	-1.47508	-1.91949
0.0628	0.366	-0.56718	-1.6508	-1.78353	0.54074	0.35467	1.1943	-0.4546	-1.81947		0.0628	-9.18771	0.396809	1.86491	-0.0632334	-4.94164	5.40541	-1.04987	-11.859	3.95198		0.0628	-0.8519	-1.30775	0.186306	-0.490491	0.399834	1.17989	1.3719	-1.48205	-1.93379
0.06285	0.35836	-0.58658	-1.63498	-1.81022	0.53638	0.36887	1.18551	-0.43581	-1.82985		0.06285	-6.81626	-3.37879	2.81661	-0.21925	-3.84953	4.50051	1.4776	-9.89324	3.70235		0.06285	-0.862796	-1.31092	0.190292	-0.489904	0.41594	1.17508	1.36573	-1.48903	-1.94798
0.0629	0.35096	-0.60594	-1.61905	-1.83718	0.53184	0.38293	1.17653	-0.41711	-1.84001		0.0629	-6.48862	-4.22127	-1.48944	0.826059	-4.34878	3.61122	0.46349	-6.42967	3.1875		0.0629	-0.873669	-1.31398	0.194378	-0.489242	0.431958	1.17012	1.35944	-1.49603	-1.96206
0.06295	0.34382	-0.62525	-1.60302	-1.86438	0.5271	0.39683	1.16737	-0.39852	-1.84995		0.06295	-7.44032	-2.80153	-3.29923	1.37212	-3.5219	3.58002	-2.06397	-5.88362	4.77887		0.06295	-0.884518	-1.31692	0.198559	-0.488508	0.447883	1.16502	1.35305	-1.50305	-1.97602
0.063	0.33693	-0.6445	-1.58688	-1.89182	0.52218	0.41059	1.15804	-0.38002	-1.85966		0.063	-7.76796	-1.11655	-0.132102	3.35352	-3.74032	3.34599	-4.15459	-7.27216	8.9133		0.063	-0.895342	-1.31974	0.202834	-0.487702	0.463715	1.15977	1.34655	-1.51007	-1.98988
0.06305	0.3303	-0.66369	-1.57064	-1.91948	0.51707	0.42418	1.14854	-0.36163	-1.86914		0.06305	-7.86157	-0.102443	3.59669	3.75917	-5.14447	3.26798	-4.31061	-7.28776	11.2535		0.06305	-0.906141	-1.32243	0.207201	-0.486827	0.47945	1.15438	1.33994	-1.51711	-2.00362
0.0631	0.32395	-0.6828	-1.55431	-1.94735	0.51178	0.43762	1.13888	-0.34335	-1.87838		0.0631	-7.87717	0.240792	2.67619	2.07419	-3.45949	3.51761	-2.23559	-9.97124	11.706		0.0631	-0.916911	-1.325	0.211656	-0.485884	0.495084	1.14884	1.33323	-1.52415	-2.01725
0.06315	0.31789	-0.70183	-1.53788	-1.97541	0.50631	0.45089	1.12907	-0.32518	-1.88738		0.06315	-7.75236	0.958467	2.00532	2.85427	-2.27377	3.98566	-1.73634	-11.9683	9.38135		0.06315	-0.927653	-1.32743	0.216198	-0.484878	0.510615	1.14315	1.32641	-1.53119	-2.03077
0.0632	0.31211	-0.72077	-1.52136	-2.00366	0.50065	0.46399	1.11912	-0.30713	-1.89614		0.0632	-7.47153	1.81656	2.44217	3.35352	-2.53899	3.79844	-1.20588	-12.1555	5.34052		0.0632	-0.938366	-1.32973	0.220826	-0.483809	0.52604	1.13732	1.3195	-1.53824	-2.04417
0.06325	0.30662	-0.73962	-1.50475	-2.03209	0.49482	0.47692	1.10901	-0.2892	-1.90465		0.06325	-5.2873	1.75415	3.03503	3.60315	-2.41418	4.15728	-1.3463	-9.86203	1.75215		0.06325	-0.949048	-1.3319	0.225537	-0.482681	0.541358	1.13135	1.31249	-1.5453	-2.05745
0.0633	0.30143	-0.75836	-1.48806	-2.06067	0.48882	0.48968	1.09877	-0.27138	-1.91291		0.0633	-5.16249	1.3173	4.25196	3.41593	-1.75891	4.01686	-2.03277	-9.65921	1.17489		0.0633	-0.959697	-1.33393	0.230329	-0.481497	0.556566	1.12524	1.30539	-1.55235	-2.07061
0.06335	0.29656	-0.77699	-1.47129	-2.08939	0.48264	0.50225	1.0884	-0.2537	-1.92091		0.06335	-7.54953	1.36411	4.09594	4.72647	-0.0583345	4.17288	-3.14049	-10.1741	1.93937		0.06335	-0.970315	-1.33581	0.2352	-0.480258	0.571662	1.11898	1.2982	-1.55942	-2.08365
0.0634	0.292	-0.7955	-1.45445	-2.11825	0.4763	0.51464	1.07791	-0.23614	-1.92866		0.0634	-8.59484	2.56544	3.12864	4.21161	-0.791611	3.72043	-5.52754	-10.3925	3.28111		0.0634	-0.980899	-1.33756	0.240148	-0.478965	0.586643	1.11258	1.29092	-1.56648	-2.09657
0.06345	0.28776	-0.81389	-1.43753	-2.14723	0.46978	0.52685	1.06729	-0.21871	-1.93614		0.06345	-5.86456	2.01938	1.24084	1.80896	-3.17866	4.96856	-7.68056	-10.8449	6.41704		0.06345	-0.991448	-1.33917	0.245172	-0.477623	0.601506	1.10604	1.28355	-1.57354	-2.10936
0.0635	0.28385	-0.83214	-1.42054	-2.17631	0.4631	0.53886	1.05656	-0.20142	-1.94336		0.0635	-4.61643	0.162784	0.725987	-1.49858	-3.64671	4.09487	-6.52604	-11.9058	6.51065		0.0635	-1.00196	-1.34064	0.250269	-0.476231	0.616251	1.09936	1.2761	-1.58059	-2.12203
0.06355	0.28027	-0.85025	-1.40349	-2.20548	0.45625	0.55068	1.04572	-0.18427	-1.9503		0.06355	-6.47302	-1.10095	2.11453	-3.13675	-2.72621	5.01537	-3.90497	-12.4207	6.38583		0.06355	-1.01243	-1.34196	0.255438	-0.474795	0.630873	1.09255	1.26856	-1.58765	-2.13457
0.0636	0.27703	-0.86822	-1.38637	-2.23473	0.44925	0.56231	1.03477	-0.16726	-1.95697		0.0636	-6.83186	-0.664102	1.7869	-0.999331	-0.557587	7.19959	-3.57733	-10.8137	7.36874		0.0636	-1.02286	-1.34315	0.260676	-0.473316	0.645371	1.0856	1.26095	-1.59469	-2.14698
0.06365	0.27414	-0.88602	-1.36919	-2.26405	0.44209	0.57374	1.02373	-0.15039	-1.96337		0.06365	-5.50572	-0.882525	-1.62986	1.59054	-0.323562	7.46482	-3.32771	-11.3598	4.87248		0.06365	-1.03324	-1.34418	0.265979	-0.471796	0.659743	1.07853	1.25326	-1.60173	-2.15926
0.0637	0.2716	-0.90367	-1.35195	-2.29341	0.43477	0.58496	1.01259	-0.13367	-1.96948		0.0637	-4.44481	1.2393	-0.21011	4.39883	-0.276757	3.4708	-3.68654	-10.6109	5.76177		0.0637	-1.04358	-1.34507	0.271346	-0.470239	0.673986	1.07132	1.2455	-1.60876	-2.17141
0.06375	0.26941	-0.92115	-1.33466	-2.32282	0.4273	0.59599	1.00137	-0.11709	-1.97531		0.06375	-4.21079	2.58104	1.72449	4.60165	-1.19725	2.11346	-2.3292	-9.20676	8.33604		0.06375	-1.05386	-1.34582	0.276773	-0.468647	0.688098	1.06398	1.23765	-1.61579	-2.18343
0.0638	0.26759	-0.93845	-1.31732	-2.35225	0.41967	0.6068	0.99007	-0.10067	-1.98085		0.0638	-5.47452	1.37971	0.148727	3.05709	-0.666798	3.48641	1.00955	-7.45938	7.54035		0.0638	-1.06409	-1.34642	0.282258	-0.467019	0.702078	1.05652	1.22974	-1.62281	-2.19532
0.06385	0.26613	-0.95557	-1.29993	-2.38168	0.4119	0.61741	0.97869	-0.08441	-1.9861		0.06385	-7.73675	2.31581	-0.412931	2.04299	-0.214351	4.20408	-0.222982	-8.02104	5.69936		0.06385	-1.07427	-1.34687	0.287798	-0.46536	0.715922	1.04893	1.22176	-1.62983	-2.20708
0.0639	0.26504	-0.97251	-1.2825	-2.41112	0.40398	0.6278	0.96724	-0.06831	-1.99106		0.0639	-7.81476	4.00078	0.55437	3.69676	-1.91493	4.17288	-1.64273	-9.31598	3.48393		0.0639	-1.08438	-1.34718	0.293394	-0.463668	0.72963	1.04122	1.21372	-1.63684	-2.21871
0.06395	0.26433	-0.98924	-1.26503	-2.44053	0.39592	0.63798	0.95572	-0.05236	-1.99572		0.06395	-4.99087	1.08328	1.75569	4.96049	-3.14746	3.70483	-2.3448	-9.30037	1.90817		0.06395	-1.09444	-1.34735	0.299041	-0.461949	0.7432	1.03339	1.20562	-1.64384	-2.23021
0.064	0.26399	-1.00578	-1.24751	-2.46991	0.38772	0.64795	0.94414	-0.03658	-2.00008		0.064	-4.74124	-1.25696	2.801	4.41443	-3.02264	1.98865	-2.14198	-8.91033	2.61024		0.064	-1.10444	-1.34737	0.304739	-0.460203	0.756628	1.02543	1.19745	-1.65084	-2.24157
0.06405	0.26404	-1.02211	-1.22996	-2.49925	0.37938	0.65769	0.93251	-0.02097	-2.00413		0.06405	-6.3014	0.818053	2.52017	1.06008	-2.77302	2.16027	-1.67393	-6.42967	4.82567		0.06405	-1.11438	-1.34726	0.310483	-0.458432	0.769913	1.01736	1.18923	-1.65783	-2.2528
0.0641	0.26448	-1.03823	-1.21238	-2.52853	0.3709	0.66722	0.92083	-0.00552	-2.00788		0.0641	-6.73825	1.98817	4.62639	-1.88862	-1.18165	2.87794	-1.70514	-3.96462	7.43114		0.0641	-1.12426	-1.347	0.316272	-0.456637	0.783054	1.00917	1.18095	-1.66481	-2.26388
0.06415	0.26531	-1.05413	-1.19477	-2.55773	0.36229	0.67652	0.9091	0.00975	-2.01133		0.06415	-6.00497	-0.305265	6.88863	-1.32697	0.0352753	2.86234	-4.99708	-6.02403	9.95861		0.06415	-1.13408	-1.3466	0.322105	-0.454819	0.796046	1.00087	1.17262	-1.67178	-2.27483
0.0642	0.26654	-1.06981	-1.17713	-2.58685	0.35355	0.6856	0.89734	0.02484	-2.01446		0.0642	-4.16398	0.59963	3.89312	0.498425	-0.900822	2.40989	-6.65085	-5.38437	8.99131		0.0642	-1.14383	-1.34606	0.327979	-0.452978	0.80889	0.992452	1.16424	-1.67874	-2.28563
0.06425	0.26816	-1.08526	-1.15946	-2.61587	0.34468	0.69446	0.88554	0.03977	-2.01727		0.06425	-3.74274	4.1412	-0.865379	0.888466	-1.6029	3.04956	-4.80986	-5.85241	9.19413		0.06425	-1.15352	-1.34538	0.333892	-0.451115	0.821583	0.983927	1.1558	-1.68568	-2.2963
0.0643	0.27018	-1.10047	-1.14178	-2.64477	0.33568	0.70308	0.8737	0.05451	-2.01977		0.0643	-4.49162	3.79796	-0.194509	-1.04614	0.518926	3.22118	-0.987461	-7.02254	9.865		0.0643	-1.16314	-1.34456	0.339843	-0.449231	0.834124	0.975297	1.14732	-1.69261	-2.30682
0.06435	0.27261	-1.11544	-1.12408	-2.67354	0.32657	0.71148	0.86185	0.06907	-2.02196		0.06435	-4.89726	1.48892	0.00831255	-0.749705	1.93867	2.56591	1.71162	-6.32046	10.5827		0.06435	-1.1727	-1.3436	0.345828	-0.447328	0.846511	0.966561	1.13879	-1.69952	-2.31719
0.0644	0.27545	-1.13017	-1.10636	-2.70217	0.31733	0.71965	0.84997	0.08344	-2.02382		0.0644	-6.00497	0.880459	-0.615753	0.45162	1.70465	1.58301	2.03925	-5.27515	9.78699		0.0644	-1.18219	-1.3425	0.351845	-0.445407	0.858745	0.957725	1.13021	-1.70642	-2.32742
0.06445	0.27869	-1.14464	-1.08863	-2.73065	0.30797	0.72758	0.83808	0.09763	-2.02535		0.06445	-5.92697	2.08178	1.61528	2.69825	-0.0115296	1.89504	-0.144973	-5.46237	7.33753		0.06445	-1.1916	-1.34127	0.357892	-0.443471	0.870827	0.94879	1.1216	-1.7133	-2.3375
0.0645	0.28235	-1.15886	-1.07089	-2.75895	0.2985	0.73529	0.82617	0.11163	-2.02657		0.0645	-5.94257	3.23631	1.10043	5.22572	-1.58729	5.03097	-3.01567	-5.18154	5.79297		0.0645	-1.20094	-1.33989	0.363966	-0.441522	0.882755	0.93976	1.11294	-1.72016	-2.34744
0.06455	0.28642	-1.17283	-1.05315	-2.78707	0.28891	0.74276	0.81426	0.12544	-2.02745		0.06455	-5.24049	3.79796	-0.568948	6.59866	-2.18016	8.13569	-2.71924	-6.80411	3.63995		0.06455	-1.2102	-1.33839	0.370064	-0.439562	0.894533	0.930635	1.10425	-1.727	-2.35723
0.0646	0.2909	-1.18652	-1.0354	-2.81499	0.27922	0.74999	0.80235	0.13906	-2.02801		0.0646	-4.95966	2.00378	0.27354	4.66406	-3.74032	9.00938	-1.70514	-8.5983	4.21721		0.0646	-1.21939	-1.33674	0.376184	-0.43759	0.90616	0.921421	1.09552	-1.73381	-2.36687
0.06465	0.2958	-1.19995	-1.01764	-2.84271	0.26942	0.75699	0.79044	0.15248	-2.02823		0.06465	-5.63053	1.76975	2.89461	3.72796	-1.79012	9.47743	-2.3136	-8.42668	8.11761		0.06465	-1.22849	-1.33496	0.382324	-0.435608	0.917637	0.912121	1.08677	-1.74061	-2.37635
0.0647	0.30112	-1.21311	-0.99989	-2.8702	0.25951	0.76375	0.77853	0.1657	-2.02813		0.0647	-8.53244	3.1427	3.97113	4.0868	0.612536	7.2776	-3.99858	-7.19415	8.83529		0.0647	-1.23751	-1.33304	0.388484	-0.433616	0.928962	0.902736	1.07798	-1.74738	-2.38569
0.06475	0.30686	-1.22599	-0.98215	-2.89745	0.2495	0.77028	0.76664	0.17873	-2.02769		0.06475	-10.0926	3.1427	2.69179	2.35502	0.0196737	3.86084	-2.64123	-7.72461	6.96309		0.06475	-1.24644	-1.33099	0.394662	-0.431613	0.940136	0.893271	1.06916	-1.75413	-2.39488
0.0648	0.31302	-1.23859	-0.96441	-2.92445	0.23939	0.77656	0.75476	0.19155	-2.02691		0.0648	-8.51684	2.86187	1.42806	0.560832	-2.28937	2.76873	-1.68953	-9.62801	6.88509		0.0648	-1.25528	-1.3288	0.400855	-0.429601	0.951157	0.883729	1.06032	-1.76085	-2.40392
0.06485	0.3196	-1.25091	-0.94668	-2.95118	0.22919	0.78261	0.7429	0.20417	-2.0258		0.06485	-7.76796	4.03199	0.507565	-0.812112	-3.41268	4.89055	-2.93767	-9.44079	5.49654		0.06485	-1.26404	-1.32647	0.407062	-0.427581	0.962026	0.874109	1.05145	-1.76755	-2.41281
0.0649	0.3266	-1.26294	-0.92897	-2.97764	0.21889	0.78842	0.73106	0.21659	-2.02435		0.0649	-7.72115	3.12709	-0.054094	-1.71701	-1.35327	5.20258	-1.76754	-9.01955	5.93339		0.0649	-1.2727	-1.324	0.413282	-0.425553	0.972744	0.864419	1.04256	-1.77421	-2.42154
0.06495	0.33402	-1.27468	-0.91127	-3.00381	0.2085	0.79399	0.71925	0.2288	-2.02256		0.06495	-7.2219	2.191	-0.30372	-0.422071	0.440918	2.81554	-1.06547	-9.08195	10.0054		0.06495	-1.28126	-1.3214	0.419516	-0.42352	0.983311	0.854659	1.03366	-1.78084	-2.43012
0.065	0.34186	-1.28613	-0.89359	-3.02967	0.19802	0.79932	0.70747	0.2408	-2.02043		0.065	-4.95966	1.44212	0.133126	0.560832	0.799755	1.89504	-1.82995	-6.13324	11.1443		0.065	-1.28973	-1.31867	0.42576	-0.421484	0.993729	0.844829	1.02473	-1.78744	-2.43855
0.06505	0.35012	-1.29728	-0.87593	-3.05522	0.18745	0.80441	0.69572	0.25259	-2.01797		0.06505	-4.64763	1.3173	3.12864	-0.578087	-0.307961	5.3742	-3.04688	-4.90072	8.64807		0.06505	-1.29809	-1.3158	0.432015	-0.419445	1.004	0.834934	1.01579	-1.794	-2.44682
0.0651	0.35881	-1.30813	-0.85829	-3.08044	0.1768	0.80926	0.68401	0.26417	-2.01516		0.0651	-6.44182	1.37971	3.83071	-1.17095	-1.16605	9.74266	-2.98447	-4.93192	10.6139		0.0651	-1.30635	-1.3128	0.43828	-0.417406	1.01412	0.824974	1.00683	-1.80052	-2.45493
0.06515	0.36791	-1.31868	-0.84068	-3.10531	0.16607	0.81388	0.67234	0.27554	-2.01201		0.06515	-6.56663	0.708841	1.72449	2.55784	-0.978831	10.2731	0.432287	-4.94752	10.7543		0.06515	-1.31451	-1.30967	0.444552	-0.415366	1.02408	0.81495	0.997864	-1.80701	-2.46289
0.0652	0.37743	-1.32893	-0.8231	-3.12984	0.15526	0.81825	0.66072	0.2867	-2.00852		0.0652	-6.98788	0.193988	1.58408	4.14921	-0.932026	8.1825	1.5088	-7.72461	8.69488		0.0652	-1.32255	-1.30641	0.45083	-0.41333	1.0339	0.804866	0.988887	-1.81345	-2.47068
0.06525	0.38738	-1.33887	-0.80555	-3.15399	0.14437	0.82238	0.64915	0.29764	-2.00468		0.06525	-7.61194	-0.866923	0.725987	-0.812112	-3.38148	6.45072	-1.54912	-8.23946	6.44824		0.06525	-1.33049	-1.30302	0.457112	-0.411297	1.04357	0.794722	0.9799	-1.81984	-2.47831
0.0653	0.39773	-1.3485	-0.78803	-3.17777	0.13341	0.82627	0.63762	0.30836	-2.00051		0.0653	-7.09709	-0.0868418	0.289142	-1.60779	-4.30198	5.81105	-2.21999	-6.55449	3.70235		0.0653	-1.33831	-1.29951	0.463397	-0.40927	1.05309	0.784522	0.970909	-1.8262	-2.48578
0.06535	0.4085	-1.35782	-0.77055	-3.20116	0.12238	0.82992	0.62615	0.31886	-1.996		0.06535	-6.48862	2.09739	-0.459736	1.73095	-2.49219	4.26649	-1.97036	-5.29076	2.14219		0.06535	-1.34602	-1.29587	0.469682	-0.407251	1.06245	0.774268	0.961915	-1.8325	-2.49309
0.0654	0.41969	-1.36683	-0.75311	-3.22414	0.11128	0.83334	0.61474	0.32915	-1.99114		0.0654	-6.64464	1.66054	-0.366127	3.58755	-1.30646	2.92475	-4.09219	-4.52628	3.73356		0.0654	-1.3536	-1.2921	0.475965	-0.40524	1.07166	0.763961	0.952918	-1.83875	-2.50024
0.06545	0.43128	-1.37552	-0.73572	-3.24672	0.10011	0.83651	0.60339	0.33921	-1.98594		0.06545	-5.73975	0.662036	-1.89509	2.12099	-0.245554	1.86384	-5.07509	-5.79001	5.87098		0.06545	-1.36107	-1.2882	0.482245	-0.403239	1.08072	0.753604	0.943923	-1.84496	-2.50722
0.0655	0.44329	-1.38391	-0.71837	-3.26886	0.08888	0.83945	0.5921	0.34906	-1.9804		0.0655	-3.85195	0.615232	-3.9077	-0.188046	0.17569	0.94334	-2.62563	-8.02104	7.46235		0.0655	-1.36842	-1.28418	0.488517	-0.401248	1.08962	0.743199	0.934929	-1.85111	-2.51405
0.06555	0.4557	-1.39197	-0.70106	-3.29057	0.07759	0.84215	0.58088	0.35868	-1.97452		0.06555	-2.58822	-1.42858	-3.11201	0.311206	-1.13485	2.42549	-1.76754	-9.42519	5.35613		0.06555	-1.37564	-1.28004	0.49478	-0.399267	1.09837	0.732746	0.925941	-1.8572	-2.52071
0.0656	0.46851	-1.39973	-0.68381	-3.31183	0.06625	0.84462	0.56972	0.36808	-1.96831		0.0656	-3.63353	-1.02294	-1.77027	2.90108	-0.307961	5.14018	-1.01866	-7.5842	4.62285		0.0656	-1.38274	-1.27578	0.50103	-0.397297	1.10697	0.722252	0.916961	-1.86323	-2.5272
0.06565	0.48173	-1.40716	-0.66661	-3.33262	0.05484	0.84685	0.55864	0.37725	-1.96175		0.06565	-4.58523	2.97108	-1.44264	1.54373	0.503324	7.05918	-1.20588	-5.49358	7.32193		0.06565	-1.38972	-1.27139	0.507266	-0.395341	1.11541	0.711718	0.907989	-1.86921	-2.53354
0.0657	0.49534	-1.41427	-0.64947	-3.35295	0.04339	0.84885	0.54763	0.3862	-1.95486		0.0657	-3.85195	4.21921	-3.53326	1.27851	-0.557587	7.52723	-4.02978	-3.51217	7.46235		0.0657	-1.39656	-1.26689	0.513482	-0.393397	1.1237	0.701148	0.89903	-1.87512	-2.53971
0.06575	0.50934	-1.42107	-0.63238	-3.3728	0.03188	0.85061	0.5367	0.39492	-1.94764		0.06575	-3.78954	2.56544	-8.24495	2.51104	-0.385969	7.80806	-5.71475	-2.8413	6.49505		0.06575	-1.40328	-1.26227	0.519678	-0.391467	1.13184	0.690544	0.890086	-1.88096	-2.54571
0.0658	0.52374	-1.42755	-0.61536	-3.39215	0.02033	0.85214	0.52584	0.40342	-1.94008		0.0658	-4.49162	1.89457	-10.2264	2.46423	1.09619	9.25901	-5.60554	-3.48097	5.24692		0.0658	-1.40987	-1.25753	0.525852	-0.389551	1.13983	0.679907	0.881157	-1.88674	-2.55155
0.06585	0.53852	-1.43371	-0.5984	-3.41101	0.00873	0.85343	0.51507	0.41169	-1.93218		0.06585	-5.13128	3.42352	-6.54437	4.43004	2.46913	9.1498	-6.05799	-2.56047	3.96758		0.06585	-1.41632	-1.25268	0.532002	-0.387651	1.14767	0.669242	0.872244	-1.89245	-2.55723
0.0659	0.55369	-1.43956	-0.58151	-3.42935	-0.00291	0.8545	0.50437	0.41973	-1.92396		0.0659	-4.32	1.41091	-2.79998	4.63286	2.43793	7.41802	-6.24521	-1.79599	2.73505		0.0659	-1.42265	-1.24771	0.538123	-0.385767	1.15536	0.658551	0.863353	-1.89809	-2.56275
0.06595	0.56923	-1.44508	-0.56469	-3.44716	-0.01459	0.85534	0.49376	0.42755	-1.91541		0.06595	-4.22639	0.724443	-1.56745	1.2473	2.84357	6.62233	-5.1687	-2.98171	3.62435		0.06595	-1.42883	-1.24264	0.544215	-0.3839	1.16289	0.647838	0.854482	-1.90365	-2.5681
0.066	0.58515	-1.45029	-0.54794	-3.46445	-0.0263	0.85595	0.48324	0.43514	-1.90653		0.066	-4.55402	0.537223	-0.39733	0.826059	2.81237	6.55993	-4.68505	-3.8242	3.51513		0.066	-1.43488	-1.23745	0.550273	-0.382051	1.17028	0.637106	0.845632	-1.90915	-2.5733
0.06605	0.60144	-1.45519	-0.53126	-3.48119	-0.03806	0.85633	0.47281	0.4425	-1.89733		0.06605	-5.41211	0.381207	3.08183	2.51104	2.09469	4.14167	-3.54613	-4.30785	2.37622		0.06605	-1.4408	-1.23215	0.556296	-0.380219	1.17752	0.626353	0.836805	-1.91457	-2.57832
0.0661	0.6181	-1.45976	-0.51466	-3.49739	-0.04984	0.85648	0.46246	0.44963	-1.8878		0.0661	-6.2234	2.84626	0.351548	2.85427	1.95428	3.56441	-4.88787	-2.76329	2.29821		0.0661	-1.44657	-1.22675	0.56228	-0.378406	1.18462	0.615586	0.828002	-1.91991	-2.58319
0.06615	0.63511	-1.46403	-0.49814	-3.51302	-0.06166	0.85642	0.45221	0.45653	-1.87796		0.06615	-6.36381	2.93987	-1.64546	2.35502	2.29751	4.3601	-6.74446	-2.48246	5.91779		0.06615	-1.45221	-1.22124	0.568224	-0.37661	1.19156	0.604806	0.819224	-1.92517	-2.58788
0.0662	0.65248	-1.46797	-0.48171	-3.52808	-0.0735	0.85613	0.44205	0.46321	-1.8678		0.0662	-6.59784	2.54983	-0.163305	1.59054	3.56124	5.03097	-6.94728	-5.97723	8.10201		0.0662	-1.4577	-1.21562	0.574124	-0.374833	1.19836	0.594014	0.810472	-1.93036	-2.59242
0.06625	0.6702	-1.47161	-0.46536	-3.54257	-0.08536	0.85562	0.43198	0.46965	-1.85732		0.06625	-4.81925	1.59813	2.91022	0.108385	3.20241	4.4069	-6.24521	-9.78402	7.47795		0.06625	-1.46306	-1.20991	0.579979	-0.373073	1.205	0.583215	0.801747	-1.93546	-2.59679
0.0663	0.68826	-1.47494	-0.4491	-3.55647	-0.09725	0.85489	0.422	0.47587	-1.84654		0.0663	-2.75983	-0.180452	3.28465	-0.593689	2.2351	4.18848	-4.62264	-11.6874	6.63546		0.0663	-1.46828	-1.2041	0.585788	-0.371333	1.2115	0.57241	0.79305	-1.94048	-2.60099
0.06635	0.70667	-1.47796	-0.43293	-3.56978	-0.10916	0.85394	0.41213	0.48186	-1.83545		0.06635	-3.3527	0.521622	0.335947	0.123986	1.61104	4.68773	-4.54463	-11.157	6.027		0.06635	-1.47336	-1.19819	0.591547	-0.369614	1.21785	0.561601	0.784383	-1.94542	-2.60502
0.0664	0.7254	-1.48067	-0.41685	-3.58248	-0.12108	0.85277	0.40235	0.48762	-1.82405		0.0664	-3.77394	3.08029	-1.34903	1.1849	1.34581	5.48341	-6.26081	-8.95714	4.37322		0.0664	-1.47829	-1.19219	0.597256	-0.367918	1.22405	0.550793	0.775745	-1.95027	-2.60889
0.06645	0.74446	-1.48308	-0.40088	-3.59458	-0.13302	0.85139	0.39267	0.49315	-1.81235		0.06645	-3.80514	2.58104	-1.17741	0.592035	2.68755	6.41951	-6.21401	-7.30337	3.88957		0.06645	-1.48309	-1.1861	0.602912	-0.366244	1.23011	0.539989	0.767139	-1.95503	-2.6126
0.0665	0.76384	-1.48519	-0.385	-3.60605	-0.14497	0.8498	0.38308	0.49845	-1.80035		0.0665	-5.77095	-0.383273	-0.21011	-1.04614	1.73585	7.01237	-4.2482	-5.61839	5.90218		0.0665	-1.48774	-1.17993	0.608513	-0.364594	1.23602	0.529188	0.758565	-1.9597	-2.61613
0.06655	0.78354	-1.48699	-0.36922	-3.61691	-0.15694	0.848	0.3736	0.50353	-1.78807		0.06655	-7.47153	-0.960533	0.413955	1.2005	-0.0115296	6.21669	-2.00157	-2.68528	6.27662		0.06655	-1.49225	-1.17367	0.614056	-0.362966	1.24178	0.518396	0.750021	-1.96428	-2.6195
0.0666	0.80354	-1.4885	-0.35355	-3.62713	-0.1689	0.84599	0.36422	0.50838	-1.77549		0.0666	-7.62754	-1.5846	3.23785	4.0868	-0.370367	5.65503	-1.08107	0.481847	4.43563		0.0666	-1.49661	-1.16734	0.619541	-0.361361	1.2474	0.507617	0.741512	-1.96877	-2.62269
0.06665	0.82385	-1.48972	-0.33799	-3.63672	-0.18087	0.84377	0.35494	0.513	-1.76262		0.06665	-7.11269	-1.22576	2.50457	5.36613	0.144487	4.70333	-2.54762	0.388237	4.09239		0.06665	-1.50082	-1.16093	0.624962	-0.359777	1.25287	0.496851	0.733037	-1.97317	-2.62573
0.0667	0.84445	-1.49064	-0.32253	-3.64566	-0.19285	0.84134	0.34576	0.5174	-1.74948		0.0667	-6.39501	0.00676799	-0.132102	3.60315	2.93718	2.30068	-4.04538	-2.01441	5.79297		0.0667	-1.50489	-1.15444	0.630317	-0.358215	1.2582	0.486103	0.724596	-1.97747	-2.62859
0.06675	0.86533	-1.49128	-0.3072	-3.65395	-0.20482	0.83872	0.33668	0.52157	-1.73606		0.06675	-5.36531	-0.383273	-2.23832	0.935271	5.18381	2.73753	-4.80986	-2.48246	5.91779		0.06675	-1.50881	-1.14788	0.635604	-0.356675	1.26338	0.475377	0.716193	-1.98168	-2.63129
0.0668	0.8865	-1.49163	-0.29197	-3.66158	-0.21679	0.83589	0.32771	0.52552	-1.72236		0.0668	-3.22788	1.37971	-0.0696956	2.199	5.1058	3.54881	-4.06098	-3.63698	4.32642		0.0668	-1.51258	-1.14125	0.64082	-0.355156	1.26842	0.464678	0.707826	-1.98579	-2.63382
0.06685	0.90793	-1.49169	-0.27687	-3.66856	-0.22875	0.83286	0.31884	0.52924	-1.7084		0.06685	-2.68183	1.72295	6.6234	4.25842	3.34282	1.81703	-2.3136	-6.49208	1.48692		0.06685	-1.51621	-1.13456	0.645961	-0.353659	1.27332	0.454005	0.699499	-1.98981	-2.63618
0.0669	0.92964	-1.49148	-0.26189	-3.67486	-0.24071	0.82963	0.31007	0.53275	-1.69418		0.0669	-3.58672	2.84626	10.1338	1.09129	3.98249	0.646909	1.27477	-4.7915	1.20609		0.0669	-1.51968	-1.1278	0.651026	-0.352181	1.27807	0.443365	0.69121	-1.99372	-2.63838
0.06695	0.9516	-1.491	-0.24703	-3.6805	-0.25265	0.82621	0.3014	0.53603	-1.6797		0.06695	-5.3341	2.90867	7.15386	-0.952526	4.77817	1.94184	2.55411	-1.54636	2.14219		0.06695	-1.52301	-1.12098	0.656011	-0.350724	1.28269	0.432757	0.682963	-1.99753	-2.64041
0.067	0.9738	-1.49024	-0.2323	-3.68546	-0.26459	0.8226	0.29283	0.53909	-1.66496		0.067	-5.41211	1.20809	1.64648	0.045978	3.59245	1.78583	-1.40871	-1.23433	1.50252		0.067	-1.52619	-1.11409	0.660915	-0.349287	1.28718	0.422186	0.674755	-2.00124	-2.64227
0.06705	0.99626	-1.48921	-0.21771	-3.68973	-0.2765	0.81879	0.28437	0.54193	-1.64998		0.06705	-2.66622	-0.92933	-1.94189	1.69975	3.1868	-2.98827	-6.1516	-0.891096	1.95497		0.06705	-1.52922	-1.10715	0.665736	-0.34787	1.29152	0.411652	0.666589	-2.00485	-2.64397
0.0671	1.01894	-1.48792	-0.20324	-3.69332	-0.2884	0.8148	0.27601	0.54455	-1.63476		0.0671	-2.4478	-1.42858	-3.03401	1.12249	1.86067	-4.92287	-5.83957	-0.594665	1.76775		0.0671	-1.53209	-1.10015	0.670473	-0.346472	1.29573	0.401159	0.658464	-2.00835	-2.64551
0.06715	1.04185	-1.48638	-0.18892	-3.69623	-0.30028	0.81062	0.26775	0.54696	-1.6193		0.06715	-2.3854	-2.20866	-1.14621	2.199	-0.526383	-3.50312	-4.95028	-0.82869	0.41041		0.06715	-1.53482	-1.09309	0.675122	-0.345094	1.2998	0.390708	0.650383	-2.01174	-2.64687
0.0672	1.06498	-1.48457	-0.17473	-3.69844	-0.31213	0.80626	0.2596	0.54915	-1.60361		0.0672	-2.77544	-1.39738	0.226735	5.35053	-2.6326	-0.49201	-4.59144	-0.813088	0.753646		0.0672	-1.53741	-1.08599	0.679682	-0.343737	1.30375	0.380301	0.642343	-2.01504	-2.64808
0.06725	1.08832	-1.48252	-0.16068	-3.69995	-0.32396	0.80171	0.25154	0.55113	-1.5877		0.06725	-3.82075	-0.679704	-1.56745	6.31783	-3.22547	-0.538815	-4.06098	-0.501056	1.44012		0.06725	-1.53984	-1.07884	0.684152	-0.342403	1.30756	0.369944	0.634347	-2.01822	-2.64911
0.0673	1.11185	-1.48022	-0.14678	-3.70077	-0.33575	0.79698	0.24359	0.55289	-1.57157		0.0673	-3.85195	-3.87804	-2.956	3.57195	-0.932026	-1.70894	-3.68654	-1.06271	-0.83772		0.0673	-1.54212	-1.07165	0.688528	-0.341091	1.31123	0.359635	0.626394	-2.02129	-2.64999
0.06735	1.13558	-1.47768	-0.13302	-3.70088	-0.34752	0.79208	0.23573	0.55444	-1.55522		0.06735	-2.80664	-5.79704	-1.17741	1.15369	3.34282	-4.2364	-3.2809	0.903091	-3.30278		0.06735	-1.54425	-1.06441	0.692809	-0.339801	1.31478	0.34938	0.618486	-2.02426	-2.6507
0.0674	1.1595	-1.4749	-0.11942	-3.70029	-0.35926	0.787	0.22798	0.55579	-1.53867		0.0674	0.0952635	-4.5177	1.47487	-0.172445	5.01219	-5.53134	-2.70364	2.55686	-2.81913		0.0674	-1.54623	-1.05714	0.696992	-0.338535	1.31819	0.339184	0.610623	-2.02711	-2.65124
0.06745	1.18358	-1.47189	-0.10597	-3.69899	-0.37095	0.78174	0.22032	0.55692	-1.52192		0.06745	1.20298	-4.20567	3.11304	-0.7029	3.92008	-5.34412	-1.48671	0.591058	-2.78792		0.06745	-1.54805	-1.04983	0.701076	-0.337293	1.32148	0.329049	0.602803	-2.02986	-2.65162
0.0675	1.20784	-1.46865	-0.09268	-3.69699	-0.38261	0.77632	0.21276	0.55785	-1.50498		0.0675	-2.21378	-4.73613	3.33146	0.45162	2.59394	-4.76686	-1.72074	-1.70238	-4.25448		0.0675	-1.54972	-1.04249	0.705057	-0.336075	1.32463	0.318983	0.595032	-2.03249	-2.65184
0.06755	1.23225	-1.46519	-0.07954	-3.69428	-0.39423	0.77073	0.2053	0.55857	-1.48785		0.06755	-7.65875	-3.70642	2.69179	3.50954	4.96539	-4.31441	-3.71775	-3.68379	-3.77083		0.06755	-1.55123	-1.03512	0.708936	-0.33488	1.32765	0.308988	0.587305	-2.035	-2.65191
0.0676	1.25681	-1.46151	-0.06657	-3.69085	-0.4058	0.76497	0.19793	0.55909	-1.47054		0.0676	-10.1394	-3.90924	0.0395158	6.14621	6.07311	-2.333	-7.22811	-3.74619	-2.49149		0.0676	-1.55259	-1.02772	0.71271	-0.333709	1.33053	0.299067	0.579626	-2.03741	-2.65181
0.06765	1.2815	-1.45762	-0.05377	-3.68671	-0.41733	0.75904	0.19066	0.55941	-1.45306		0.06765	-6.2546	-4.34609	-2.61276	4.14921	3.40523	0.0228439	-8.22662	-3.7618	-0.853322		0.06765	-1.55379	-1.0203	0.716377	-0.332561	1.33329	0.289225	0.571994	-2.03969	-2.65155
0.0677	1.30633	-1.45352	-0.04113	-3.68186	-0.42881	0.75296	0.18348	0.55953	-1.43542		0.0677	-1.58971	-6.07787	-1.9887	2.57344	1.64224	-3.15989	-6.08919	-2.29524	-0.775314		0.0677	-1.55484	-1.01285	0.719935	-0.331437	1.33591	0.279464	0.56441	-2.04185	-2.65113
0.06775	1.33127	-1.44922	-0.02866	-3.6763	-0.44024	0.74671	0.17639	0.55945	-1.41761		0.06775	-2.91585	-6.46791	-0.147704	2.2146	-0.510782	-6.57665	-3.98297	-1.76479	-2.02344		0.06775	-1.55573	-1.00538	0.723383	-0.330337	1.33841	0.269789	0.556873	-2.04389	-2.65057
0.0678	1.35633	-1.44473	-0.01637	-3.67003	-0.45161	0.74031	0.1694	0.55918	-1.39965		0.0678	-3.10307	-5.78144	-0.568948	2.79186	-0.307961	-6.46743	-2.96887	-3.37176	-1.27457		0.0678	-1.55646	-0.997894	0.726721	-0.329261	1.34078	0.260203	0.549383	-2.0458	-2.64984
0.06785	1.38149	-1.44004	-0.00425	-3.66304	-0.46293	0.73376	0.16249	0.55871	-1.38155		0.06785	-1.88614	-3.39439	0.55437	3.83717	0.534527	-2.87906	-4.52903	-4.90072	-1.04054		0.06785	-1.55703	-0.990389	0.729948	-0.32821	1.34302	0.250711	0.54194	-2.04759	-2.64896
0.0679	1.40674	-1.43517	0.00769	-3.65534	-0.47419	0.72705	0.15567	0.55806	-1.36332		0.0679	0.298085	-4.56451	-0.00728908	2.99469	0.893365	-0.023961	-5.44953	-4.57308	-1.53979		0.0679	-1.55744	-0.982867	0.733061	-0.327183	1.34513	0.241316	0.534545	-2.04925	-2.64794
0.06795	1.43207	-1.43012	0.01945	-3.64693	-0.48538	0.72019	0.14894	0.55721	-1.34495		0.06795	0.298085	-6.92036	-1.39583	2.47983	-0.292359	-0.226782	-4.96588	-5.54038	-2.05465		0.06795	-1.55769	-0.975333	0.73606	-0.326181	1.34712	0.232021	0.527197	-2.05078	-2.64676
0.068	1.45748	-1.4249	0.03102	-3.63781	-0.49652	0.71318	0.1423	0.55618	-1.32647		0.068	-2.16697	-6.62392	-2.23832	1.15369	-1.19725	-3.14429	-2.56323	-6.75731	-1.78942		0.068	-1.55778	-0.967793	0.738941	-0.325203	1.34897	0.222828	0.5199	-2.05218	-2.64543
0.06805	1.48295	-1.41951	0.0424	-3.62798	-0.50758	0.70603	0.13574	0.55497	-1.30787		0.06805	-4.80365	-6.71753	-0.381728	1.29411	-3.72472	-4.33001	-2.79725	-6.6949	0.457215		0.06805	-1.55772	-0.960247	0.741704	-0.32425	1.3507	0.213741	0.51265	-2.05345	-2.64395
0.0681	1.50848	-1.41395	0.05359	-3.61745	-0.51858	0.69873	0.12926	0.55357	-1.28917		0.0681	-6.2234	-9.91587	2.53578	1.01328	-4.92604	-3.92437	-4.17019	-5.49358	1.15929		0.0681	-1.5575	-0.952702	0.744344	-0.323321	1.35231	0.204765	0.505449	-2.05459	-2.64233
0.06815	1.53404	-1.40824	0.06459	-3.6062	-0.5295	0.6913	0.12287	0.55199	-1.27036		0.06815	-5.95817	-11.0236	4.36117	1.27851	-3.66231	-2.70744	-5.1999	-3.15333	0.847256		0.06815	-1.55712	-0.94516	0.746861	-0.322413	1.35379	0.195899	0.498299	-2.0556	-2.64056
0.0682	1.55965	-1.40238	0.07539	-3.59426	-0.54035	0.68372	0.11655	0.55024	-1.25147		0.0682	-4.97527	-8.96417	3.98673	2.1522	-2.39858	-0.58562	-5.49633	-3.57458	2.2358		0.0682	-1.55659	-0.937624	0.749253	-0.321526	1.35514	0.187148	0.4912	-2.05648	-2.63865
0.06825	1.58527	-1.39637	0.08599	-3.58162	-0.55112	0.67601	0.11031	0.54831	-1.2325		0.06825	-2.80664	-7.40401	3.97113	1.43452	-2.24256	-0.0707659	-4.80986	-4.41706	3.74916		0.06825	-1.5559	-0.930094	0.751517	-0.320661	1.35637	0.178514	0.484154	-2.05722	-2.6366
0.0683	1.61092	-1.39023	0.0964	-3.56828	-0.56182	0.66817	0.10415	0.54621	-1.21346		0.0683	-1.97975	-5.36019	2.16134	0.0303764	-0.900822	-1.63093	-3.12488	-3.90221	3.00028		0.0683	-1.55506	-0.922572	0.753651	-0.319817	1.35747	0.169997	0.477163	-2.05783	-2.63441
0.06835	1.63657	-1.38395	0.10659	-3.55425	-0.57243	0.66019	0.09806	0.54394	-1.19435		0.06835	-4.3356	-2.50509	1.70889	-0.203648	2.79676	-3.2691	-2.3448	-2.23284	2.45422		0.06835	-1.55407	-0.915058	0.755655	-0.318993	1.35846	0.161601	0.470227	-2.05829	-2.63208
0.0684	1.66221	-1.37755	0.11658	-3.53952	-0.58295	0.65209	0.09204	0.54151	-1.17519		0.0684	-4.80365	-0.710907	3.45627	-0.858916	3.93568	-2.66064	-3.51493	-2.51367	0.644435		0.0684	-1.55293	-0.907555	0.757525	-0.318188	1.35932	0.153325	0.463346	-2.05861	-2.62961
0.06845	1.68784	-1.37103	0.12636	-3.52411	-0.59339	0.64386	0.0861	0.53891	-1.15597		0.06845	-2.21378	-3.14476	3.97113	-2.30987	2.32871	-1.81815	-2.67244	-4.58868	-0.307265		0.06845	-1.55165	-0.900065	0.759262	-0.317403	1.36007	0.145171	0.456523	-2.05879	-2.62701
0.0685	1.71345	-1.36439	0.13592	-3.50802	-0.60373	0.6355	0.08022	0.53615	-1.13672		0.0685	-0.154363	-4.19007	2.44217	-3.38638	0.565731	-3.75275	-1.22149	-8.97274	0.925264		0.0685	-1.55022	-0.892591	0.760863	-0.316637	1.36071	0.137141	0.449757	-2.05883	-2.62428
0.06855	1.73902	-1.35764	0.14528	-3.49125	-0.61399	0.62702	0.07441	0.53323	-1.11744		0.06855	-1.27768	-4.56451	3.28465	-3.90123	-0.698001	-4.87607	-1.29949	-9.5812	0.769248		0.06855	-1.54865	-0.885138	0.762326	-0.31589	1.36122	0.129234	0.443049	-2.05871	-2.62142
0.0686	1.76455	-1.35079	0.15441	-3.47381	-0.62415	0.61842	0.06866	0.53015	-1.09814		0.0686	-1.32448	-5.93745	2.81661	-2.13825	-2.27377	-3.54993	-0.706632	-5.46237	0.285597		0.0686	-1.54693	-0.877707	0.763648	-0.315161	1.36162	0.121452	0.4364	-2.05844	-2.61843
0.06865	1.79003	-1.34384	0.16332	-3.4557	-0.63421	0.60971	0.06298	0.52693	-1.07883		0.06865	0.298085	-4.5021	1.38126	2.24581	-4.13036	-2.67624	-1.3931	-3.16893	1.03448		0.06865	-1.54506	-0.870303	0.764829	-0.314451	1.3619	0.113798	0.429813	-2.05803	-2.61531
0.0687	1.81544	-1.3368	0.17201	-3.43692	-0.64417	0.60087	0.05736	0.52355	-1.05951		0.0687	0.329288	-2.94194	0.741589	2.26141	-4.92604	-3.3159	-3.21849	-3.48097	3.06269		0.0687	-1.54306	-0.862926	0.765867	-0.313759	1.36207	0.106271	0.423286	-2.05745	-2.61207
0.06875	1.84079	-1.32968	0.18047	-3.41749	-0.65403	0.59193	0.0518	0.52003	-1.04019		0.06875	0.0172554	-3.40999	0.0239142	-0.156843	-3.84953	-4.61084	-5.01268	-7.35017	3.67115		0.06875	-1.54091	-0.85558	0.766761	-0.313083	1.36213	0.0988746	0.416822	-2.05672	-2.6087
0.0688	1.86605	-1.32248	0.1887	-3.39741	-0.66378	0.58287	0.04629	0.51636	-1.02089		0.0688	-0.981249	-3.4724	1.30325	-1.43618	-0.698001	-5.1881	-4.90347	-7.69341	3.00028		0.0688	-1.53862	-0.848266	0.767509	-0.312424	1.36207	0.0916098	0.41042	-2.05584	-2.60521
0.06885	1.89122	-1.31521	0.19671	-3.37668	-0.67342	0.5737	0.04084	0.51255	-1.00162		0.06885	-0.950046	-3.22277	2.7386	-0.656095	0.2693	-4.29881	-2.01717	-2.8881	1.68974		0.06885	-1.5362	-0.840986	0.768109	-0.311782	1.3619	0.0844781	0.404079	-2.05479	-2.6016
0.0689	1.91629	-1.30787	0.20448	-3.35531	-0.68295	0.56443	0.03544	0.5086	-0.98237		0.0689	-2.51021	-5.23538	3.58109	1.40332	0.706145	-1.64653	0.525897	-0.9223	0.800451		0.0689	-1.53364	-0.833744	0.768559	-0.311158	1.36164	0.0774803	0.3978	-2.05358	-2.59787
0.06895	1.94124	-1.30047	0.21201	-3.3333	-0.69236	0.55505	0.03009	0.50452	-0.96317		0.06895	-4.61643	-4.81414	3.56548	3.47834	1.1898	-1.55292	-0.722234	-2.01441	1.14369		0.06895	-1.53094	-0.826541	0.768858	-0.31055	1.36126	0.0706189	0.391584	-2.05221	-2.59402
0.069	1.96608	-1.29302	0.2193	-3.31067	-0.70167	0.54557	0.02479	0.50031	-0.94401		0.069	-4.17958	-4.70492	5.09444	4.27402	2.28191	-1.16288	-0.831445	-3.85541	0.50402		0.069	-1.5281	-0.819378	0.769004	-0.309959	1.36079	0.0638948	0.38543	-2.05068	-2.59006
0.06905	1.99079	-1.28552	0.22636	-3.28742	-0.71085	0.53598	0.01953	0.49596	-0.92492		0.06905	-2.16697	-4.08086	5.42208	5.53775	1.90747	-1.27209	0.182661	-3.87101	-0.759712		0.06905	-1.52513	-0.812257	0.768998	-0.309385	1.36021	0.0573085	0.379337	-2.04898	-2.58599
0.0691	2.01536	-1.27797	0.23317	-3.26356	-0.7199	0.5263	0.01432	0.4915	-0.90589		0.0691	-2.93145	-0.586094	2.94142	7.97161	0.518926	-3.83076	1.66482	-3.99582	-0.868923		0.0691	-1.52203	-0.805181	0.76884	-0.308829	1.35953	0.0508614	0.373306	-2.04712	-2.58182
0.06915	2.03978	-1.27039	0.23974	-3.2391	-0.72884	0.51652	0.00915	0.4869	-0.88694		0.06915	-2.65062	-0.383273	0.757191	4.92929	3.14	-4.33001	-0.800242	-5.49358	1.44012		0.06915	-1.51879	-0.798149	0.76853	-0.308293	1.35875	0.0445544	0.367336	-2.04509	-2.57753
0.0692	2.06405	-1.26278	0.24606	-3.21404	-0.73765	0.50665	0.00402	0.48219	-0.86807		0.0692	-0.560005	-2.5363	0.757191	1.40332	3.45203	-2.02097	-5.82397	-5.93042	4.23281		0.0692	-1.51543	-0.791165	0.768069	-0.307777	1.35788	0.0383873	0.361426	-2.04288	-2.57315
0.06925	2.08815	-1.25515	0.25213	-3.18839	-0.74632	0.49669	-0.00107	0.47737	-0.8493		0.06925	-1.16847	-4.4397	0.398353	0.373612	0.628137	0.584503	-7.21251	-6.46088	4.68526		0.06925	-1.51193	-0.784231	0.767459	-0.307282	1.3569	0.0323622	0.355577	-2.04051	-2.56866
0.0693	2.11207	-1.24749	0.25795	-3.16216	-0.75487	0.48663	-0.00613	0.47243	-0.83064		0.0693	-3.14988	-4.28368	-2.0355	0.201994	-0.994432	0.912137	-5.1531	-5.86802	3.01588		0.0693	-1.50831	-0.777349	0.766697	-0.30681	1.35583	0.0264763	0.349791	-2.03797	-2.56408
0.06935	2.13581	-1.23982	0.26351	-3.13535	-0.76328	0.47649	-0.01115	0.46738	-0.81209		0.06935	-4.63203	-4.23688	-1.80148	-0.812112	-1.40007	-0.195579	-4.82546	-4.93192	1.61174		0.06935	-1.50456	-0.770522	0.765787	-0.30636	1.35467	0.020731	0.344067	-2.03527	-2.55941
0.0694	2.15935	-1.23214	0.26882	-3.10799	-0.77155	0.46626	-0.01614	0.46222	-0.79366		0.0694	-4.08597	-3.95605	-1.0994	-2.02904	-1.15045	-0.257985	-5.99558	-5.55598	1.97057		0.0694	-1.50069	-0.763751	0.764729	-0.305934	1.35341	0.0151265	0.338404	-2.03239	-2.55464
0.06945	2.1827	-1.22446	0.27387	-3.08007	-0.77968	0.45594	-0.02111	0.45696	-0.77536		0.06945	-3.3683	-4.12766	0.866402	-0.172445	-1.27526	-0.445205	-6.76006	-6.6481	2.09539		0.06945	-1.4967	-0.757042	0.763522	-0.305532	1.35206	0.00966146	0.332804	-2.02934	-2.54979
0.0695	2.20583	-1.21678	0.27866	-3.0516	-0.78767	0.44554	-0.02605	0.4516	-0.75721		0.0695	-4.32	-4.53331	2.31735	4.24282	-3.44389	-0.648026	-7.21251	-6.19565	4.62285		0.0695	-1.49258	-0.750398	0.762169	-0.305156	1.35063	0.00433558	0.327266	-2.02611	-2.54486
0.06955	2.22874	-1.20911	0.28319	-3.0226	-0.79551	0.43507	-0.03096	0.44615	-0.7392		0.06955	-4.85045	-4.04966	3.56548	6.31783	-1.96173	-0.335994	-5.01268	-1.99881	6.82268		0.06955	-1.48834	-0.743821	0.760668	-0.304803	1.3491	-0.000853306	0.32179	-2.02272	-2.53984
0.0696	2.25142	-1.20146	0.28746	-2.99308	-0.80321	0.42451	-0.03585	0.4406	-0.72136		0.0696	-5.14688	-3.5036	3.58109	2.199	1.09619	2.33188	-1.15908	-1.35915	6.82268		0.0696	-1.48399	-0.737314	0.759022	-0.304475	1.34749	-0.00590633	0.316375	-2.01915	-2.53475
0.06965	2.27387	-1.19382	0.29146	-2.96303	-0.81075	0.41388	-0.04072	0.43496	-0.70368		0.06965	-3.74274	-1.81862	3.54988	-1.29576	-0.698001	1.505	0.5571	-2.52927	5.69936		0.06965	-1.47953	-0.730881	0.75723	-0.304171	1.3458	-0.010825	0.311022	-2.0154	-2.52958
0.0697	2.29607	-1.18621	0.29519	-2.93249	-0.81814	0.40317	-0.04557	0.42923	-0.68618		0.0697	-3.96116	0.147183	2.64499	-2.68431	-1.85252	-1.22529	-0.675429	-2.48246	5.1377		0.0697	-1.47495	-0.724524	0.755294	-0.30389	1.34402	-0.0156119	0.305729	-2.01149	-2.52435
0.06975	2.31802	-1.17863	0.29866	-2.90144	-0.82537	0.39239	-0.05041	0.42342	-0.66887		0.06975	-4.81925	-0.804517	1.61528	1.66855	-2.6326	-2.17699	-1.26829	-4.54188	4.57605		0.06975	-1.47027	-0.718245	0.753215	-0.303637	1.34216	-0.0202683	0.300497	-2.0074	-2.51904
0.0698	2.3397	-1.17108	0.30185	-2.86991	-0.83245	0.38153	-0.05523	0.41753	-0.65175		0.0698	-3.08747	-2.5207	1.30325	3.43153	-4.84803	-0.476408	-0.909453	-6.72611	4.71646		0.0698	-1.46548	-0.712047	0.750994	-0.30341	1.34022	-0.024795	0.295326	-2.00313	-2.51367
0.06985	2.36112	-1.16357	0.30477	-2.83791	-0.83936	0.37061	-0.06005	0.41156	-0.63484		0.06985	-0.903241	-3.22277	0.866402	0.170791	-2.42978	3.68923	-2.25119	-5.08793	3.93638		0.06985	-1.46058	-0.705932	0.74863	-0.303213	1.33819	-0.0291936	0.290216	-1.9987	-2.50823
0.0699	2.38226	-1.1561	0.30742	-2.80544	-0.84611	0.35962	-0.06485	0.40552	-0.61814		0.0699	-1.04366	-5.36019	-0.428533	-2.94953	-0.292359	3.86084	-4.2482	-2.59167	2.96908		0.0699	-1.45559	-0.699901	0.746123	-0.303045	1.33609	-0.0334646	0.285166	-1.99409	-2.50274
0.06995	2.40311	-1.14869	0.3098	-2.77252	-0.85269	0.34857	-0.06964	0.3994	-0.60166		0.06995	-3.33709	-4.61131	0.0239142	-3.18356	-0.198749	-0.554416	-5.51193	-3.12213	1.20609		0.06995	-1.4505	-0.693958	0.743476	-0.302907	1.33391	-0.0376092	0.280178	-1.9893	-2.49718
0.07	2.42367	-1.14132	0.3119	-2.73915	-0.8591	0.33745	-0.07443	0.39322	-0.58542		0.07	-3.82075	-3.5348	1.50607	-0.874518	1.90747	-1.75574	-4.51343	-5.60279	1.79896		0.07	-1.44531	-0.688104	0.74069	-0.302798	1.33165	-0.0416298	0.275251	-1.98435	-2.49156
0.07005	2.44392	-1.13402	0.31373	-2.70536	-0.86534	0.32627	-0.07922	0.38698	-0.56941		0.07005	-2.4478	-5.76583	2.25495	0.404815	4.01369	-2.39541	-3.74895	-8.11465	4.108		0.07005	-1.44003	-0.682344	0.737763	-0.30272	1.32932	-0.0455265	0.270386	-1.97922	-2.48589
0.0701	2.46387	-1.12677	0.31527	-2.67114	-0.87141	0.31502	-0.084	0.38067	-0.55365		0.0701	-2.21378	-5.12617	2.31735	2.05859	3.06199	-2.78545	-4.80986	-7.52179	4.32642		0.0701	-1.43466	-0.676681	0.734697	-0.302672	1.32691	-0.0492993	0.265583	-1.97392	-2.48016
0.07015	2.4835	-1.1196	0.31654	-2.63652	-0.8773	0.30372	-0.08879	0.37431	-0.53815		0.07015	-3.92996	-4.82974	3.08183	1.2005	0.518926	-2.95707	-4.13899	-7.24096	2.76626		0.07015	-1.42919	-0.671114	0.731492	-0.302653	1.32443	-0.0529476	0.260844	-1.96846	-2.47437
0.0702	2.50281	-1.11249	0.31752	-2.6015	-0.88301	0.29237	-0.09358	0.36789	-0.52291		0.0702	-4.80365	-3.61281	2.52017	-0.905721	-1.33767	-2.58263	1.33718	-5.25955	0.285597		0.0702	-1.42364	-0.665649	0.728147	-0.302665	1.32188	-0.0564725	0.256169	-1.96282	-2.46854
0.07025	2.52179	-1.10546	0.31823	-2.5661	-0.88854	0.28095	-0.09837	0.36142	-0.50795		0.07025	-3.58672	-2.5363	2.00532	-1.42058	-0.417172	-1.28769	3.69303	-4.35466	-0.946932		0.07025	-1.418	-0.660285	0.724661	-0.302707	1.31925	-0.0598728	0.251559	-1.95702	-2.46265
0.0703	2.54044	-1.09851	0.31865	-2.53033	-0.89388	0.26949	-0.10317	0.35491	-0.49326		0.0703	-1.96415	-1.45979	0.694784	2.10539	0.144487	0.84973	0.666311	-5.30636	-0.042037		0.0703	-1.41228	-0.655027	0.721042	-0.30278	1.31657	-0.0631497	0.247016	-1.95104	-2.45671
0.07035	2.55874	-1.09164	0.3188	-2.49419	-0.89903	0.25797	-0.10798	0.34835	-0.47887		0.07035	-3.24349	0.396809	-0.787371	4.78887	1.31461	3.56441	-2.25119	-4.99432	1.86136		0.07035	-1.40648	-0.649873	0.717286	-0.302884	1.31382	-0.0663027	0.24254	-1.94491	-2.45073
0.0704	2.57668	-1.08485	0.31865	-2.45771	-0.904	0.2464	-0.1128	0.34174	-0.46478		0.0704	-2.65062	0.771248	-1.28662	4.96049	1.54863	4.51611	-3.73335	-4.16744	3.42152		0.0704	-1.4006	-0.644827	0.7134	-0.303019	1.31101	-0.0693322	0.238134	-1.93861	-2.4447
0.07045	2.59428	-1.07816	0.31823	-2.42089	-0.90878	0.23478	-0.11763	0.3351	-0.45099		0.07045	-3.69593	1.56693	-0.00728908	4.44564	-1.71211	3.12757	-3.3121	-4.24545	3.2187		0.07045	-1.39464	-0.63989	0.70938	-0.303184	1.30814	-0.0722397	0.233796	-1.93215	-2.43863
0.0705	2.6115	-1.07156	0.31752	-2.38375	-0.91336	0.22312	-0.12247	0.32843	-0.43752		0.0705	-4.86605	-0.913728	0.819597	4.41443	-3.89634	0.818527	-4.12339	-3.49657	0.457215		0.0705	-1.38862	-0.635063	0.705232	-0.303379	1.30521	-0.0750261	0.22953	-1.92553	-2.43253
0.07055	2.62836	-1.06506	0.31652	-2.3463	-0.91774	0.21141	-0.12733	0.32172	-0.42437		0.07055	-4.11718	-2.83273	1.98972	4.63286	-1.05684	-0.944457	-6.19841	-2.63848	0.379207		0.07055	-1.38252	-0.630349	0.700955	-0.303603	1.30222	-0.0776909	0.225333	-1.91876	-2.42639
0.0706	2.64484	-1.05866	0.31525	-2.30856	-0.92193	0.19966	-0.13221	0.31498	-0.41155		0.0706	-3.58672	-1.47539	0.585573	1.46573	1.01818	0.506494	-7.41533	-0.454251	1.84576		0.0706	-1.37636	-0.625747	0.696553	-0.303856	1.29919	-0.0802333	0.221205	-1.91182	-2.42022
0.07065	2.66095	-1.05236	0.31368	-2.27052	-0.92591	0.18786	-0.1371	0.30822	-0.39907		0.07065	-2.91585	-1.25696	0.741589	-1.17095	0.347308	1.5518	-7.30612	-0.00180355	1.03448		0.07065	-1.37013	-0.621259	0.692024	-0.30414	1.2961	-0.0826539	0.217147	-1.90473	-2.41402
0.0707	2.67666	-1.04617	0.31183	-2.23222	-0.92969	0.17603	-0.14202	0.30143	-0.38693		0.0707	-2.08896	-0.92933	1.64648	-0.000826886	1.79826	0.896535	-6.90048	-1.35915	1.87696		0.0707	-1.36384	-0.616886	0.687372	-0.304453	1.29296	-0.084951	0.213156	-1.89748	-2.40779
0.07075	2.69198	-1.04008	0.3097	-2.19366	-0.93326	0.16415	-0.14696	0.29462	-0.37515		0.07075	-1.79253	-0.398874	1.14723	5.21012	3.74846	1.45819	-6.66645	0.0293997	4.06119		0.07075	-1.3575	-0.612629	0.682598	-0.304798	1.28977	-0.0871253	0.209233	-1.89009	-2.40155
0.0708	2.7069	-1.03411	0.30728	-2.15485	-0.93662	0.15224	-0.15193	0.2878	-0.36372		0.0708	-2.79104	-1.22576	0.757191	5.80298	4.63776	3.51761	-6.99409	1.27753	5.57455		0.0708	-1.3511	-0.60849	0.677701	-0.305172	1.28653	-0.0891766	0.205378	-1.88253	-2.39527
0.07085	2.72142	-1.02825	0.30458	-2.11581	-0.93978	0.1403	-0.15692	0.28096	-0.35266		0.07085	-3.21228	-1.70941	-0.693761	2.99469	1.29901	3.70483	-6.26081	1.76118	5.0909		0.07085	-1.34464	-0.604473	0.672688	-0.305577	1.28324	-0.0911051	0.201594	-1.87483	-2.38898
0.0709	2.73553	-1.02251	0.30159	-2.07654	-0.94272	0.12832	-0.16193	0.27412	-0.34198		0.0709	-2.32299	-4.4709	-0.927785	1.04448	-1.25966	-0.0551642	-3.37451	1.83919	4.54484		0.0709	-1.33814	-0.600578	0.667558	-0.306012	1.27991	-0.0929109	0.197881	-1.86698	-2.38267
0.07095	2.74923	-1.01689	0.29832	-2.03708	-0.94544	0.1163	-0.16698	0.26726	-0.33168		0.07095	-1.27768	-7.3884	0.27354	3.22871	0.113283	-0.460807	-1.87675	1.13712	2.68825		0.07095	-1.33159	-0.596805	0.662313	-0.306475	1.27654	-0.094595	0.19424	-1.85897	-2.37635
0.071	2.7625	-1.01139	0.29476	-1.99742	-0.94795	0.10426	-0.17205	0.2604	-0.32176		0.071	0.282483	-6.77994	1.74009	5.41294	0.971373	0.75612	-2.37601	1.35554	3.00028		0.071	-1.325	-0.593155	0.656958	-0.306967	1.27312	-0.0961565	0.190671	-1.85082	-2.37002
0.07105	2.77536	-1.00602	0.29092	-1.95758	-0.95024	0.09219	-0.17716	0.25353	-0.31224		0.07105	-0.372785	-3.44119	1.02242	4.85128	-0.869619	2.98715	-3.76455	2.52566	3.26551		0.07105	-1.31836	-0.589628	0.65149	-0.307488	1.26967	-0.097595	0.187175	-1.84253	-2.36366
0.0711	2.78778	-1.00076	0.2868	-1.91757	-0.9523	0.08009	-0.1823	0.24667	-0.30312		0.0711	-0.403989	-2.42709	0.351548	3.0883	-1.49368	5.74864	-3.04688	2.77529	4.63845		0.0711	-1.31169	-0.586226	0.645911	-0.308036	1.26617	-0.0989093	0.183754	-1.8341	-2.35731
0.07115	2.79978	-0.99564	0.28239	-1.87741	-0.95414	0.06796	-0.18747	0.2398	-0.2944		0.07115	-1.54291	-1.94344	-1.81708	4.55485	0.0508769	5.21819	-4.41982	3.25894	2.92227		0.07115	-1.30497	-0.582952	0.640223	-0.308612	1.26264	-0.1001	0.180408	-1.82552	-2.35094
0.0712	2.81134	-0.99064	0.27771	-1.83711	-0.95576	0.05581	-0.19268	0.23295	-0.2861		0.0712	-1.18407	1.37971	-3.59566	3.99319	0.362909	2.25388	-6.19841	2.29164	2.09539		0.0712	-1.29823	-0.579807	0.634423	-0.309213	1.25907	-0.101167	0.177137	-1.81682	-2.34458
0.07125	2.82246	-0.98578	0.27275	-1.79669	-0.95715	0.04364	-0.19793	0.2261	-0.27822		0.07125	0.204475	4.01639	-2.56596	-0.078835	-1.85252	0.397283	-5.38712	0.778278	1.03448		0.07125	-1.29145	-0.576791	0.628512	-0.30984	1.25546	-0.102109	0.173941	-1.80798	-2.33821
0.0713	2.83313	-0.98104	0.2675	-1.75615	-0.95831	0.03145	-0.20322	0.21926	-0.27077		0.0713	0.360491	2.2222	-2.47235	0.311206	-3.50629	-0.679229	-3.56173	1.76118	-0.900127		0.0713	-1.28465	-0.573911	0.622494	-0.310493	1.25182	-0.102925	0.170821	-1.799	-2.33185
0.07135	2.84336	-0.97644	0.26198	-1.71551	-0.95923	0.01923	-0.20854	0.21244	-0.26374		0.07135	1.14057	-0.461281	-0.381728	3.32232	0.518926	0.45969	-3.21849	1.26193	-2.5851		0.07135	-1.27781	-0.571166	0.616369	-0.31117	1.24813	-0.103617	0.167779	-1.7899	-2.3255
0.0714	2.85313	-0.97197	0.25619	-1.67479	-0.95992	0.007	-0.2139	0.20563	-0.25715		0.0714	0.672524	-0.305265	2.70739	2.80747	3.1244	2.79993	-4.17019	0.107408	-2.24187		0.0714	-1.27095	-0.568558	0.610135	-0.311872	1.24442	-0.104185	0.164814	-1.78067	-2.31914
0.07145	2.86246	-0.96764	0.25012	-1.634	-0.96038	-0.00525	-0.21931	0.19884	-0.251		0.07145	-1.13727	-1.05414	4.32996	0.420417	0.815357	3.73603	-4.84106	0.0450013	-0.993736		0.07145	-1.26407	-0.566089	0.603798	-0.312596	1.24067	-0.10463	0.161926	-1.77132	-2.3128
0.0715	2.87132	-0.96344	0.24378	-1.59314	-0.9606	-0.01751	-0.22476	0.19207	-0.2453		0.0715	-1.97975	-3.56601	3.14424	-3.65161	-2.28937	3.31479	-2.92206	-0.360641	0.3168		0.0715	-1.25717	-0.563761	0.597359	-0.313342	1.23689	-0.104956	0.159117	-1.76184	-2.30647
0.07155	2.87972	-0.95937	0.23716	-1.55224	-0.96058	-0.02979	-0.23025	0.18532	-0.24005		0.07155	-2.63502	-6.26509	2.00532	-4.91534	0.394113	-0.710433	-2.11078	-0.0330068	3.26551		0.07155	-1.25024	-0.561571	0.590819	-0.314108	1.23307	-0.105161	0.156387	-1.75225	-2.30015
0.0716	2.88767	-0.95545	0.23028	-1.51131	-0.96032	-0.04207	-0.23578	0.1786	-0.23526		0.0716	-2.80664	-6.81114	1.19404	-1.07734	3.1556	-0.429603	-1.22149	1.62077	4.59165		0.0716	-1.24331	-0.559524	0.584179	-0.314896	1.22922	-0.105249	0.153739	-1.74253	-2.29384
0.07165	2.89514	-0.95165	0.22313	-1.47036	-0.95981	-0.05437	-0.24137	0.17191	-0.23093		0.07165	-1.4649	-5.93745	1.67769	1.2317	2.65635	3.70483	-2.45401	3.32134	5.41853		0.07165	-1.23636	-0.557619	0.577442	-0.315702	1.22534	-0.10522	0.151174	-1.7327	-2.28755
0.0717	2.90215	-0.948	0.21571	-1.4294	-0.95907	-0.06668	-0.24699	0.16524	-0.22706		0.0717	1.17178	-3.44119	2.84781	1.35651	2.46913	6.51312	-1.48671	2.97811	5.35613		0.0717	-1.2294	-0.55586	0.570606	-0.316526	1.22143	-0.105074	0.148693	-1.72275	-2.28128
0.07175	2.90869	-0.94448	0.20803	-1.38846	-0.95807	-0.07899	-0.25267	0.15861	-0.22366		0.07175	0.594516	-2.20866	2.28615	3.02589	3.1868	5.21819	-0.925055	4.03902	4.186		0.07175	-1.22244	-0.554244	0.563676	-0.317365	1.21748	-0.104811	0.146296	-1.71269	-2.27503
0.0718	2.91475	-0.9411	0.20009	-1.34753	-0.95683	-0.09131	-0.25839	0.15201	-0.22074		0.0718	-0.872037	0.740045	0.382752	5.959	2.06349	3.09636	-2.67244	5.55238	3.46833		0.0718	-1.21547	-0.552775	0.556649	-0.318219	1.21351	-0.10443	0.143982	-1.70251	-2.2688
0.07185	2.92034	-0.93785	0.19189	-1.30663	-0.95534	-0.10363	-0.26416	0.14545	-0.21829		0.07185	-1.90174	2.81506	0.835199	8.40845	1.31461	1.70782	-3.76455	4.22624	2.90667		0.07185	-1.20851	-0.551453	0.549532	-0.319085	1.2095	-0.103932	0.141753	-1.69222	-2.2626
0.0719	2.92546	-0.93474	0.18343	-1.26579	-0.9536	-0.11595	-0.26998	0.13892	-0.21633		0.0719	-2.12017	1.58253	1.75569	9.875	1.12739	0.75612	-4.2482	1.09031	0.113979		0.0719	-1.20155	-0.550276	0.542324	-0.319962	1.20547	-0.103316	0.139608	-1.68181	-2.25643
0.07195	2.9301	-0.93177	0.17472	-1.225	-0.9516	-0.12827	-0.27585	0.13244	-0.21485		0.07195	-1.93295	-0.289663	1.59968	7.73758	-1.01003	-0.00835935	-4.95028	0.60666	-0.900127		0.07195	-1.1946	-0.549248	0.535031	-0.32085	1.20141	-0.102582	0.137548	-1.6713	-2.25029
0.072	2.93426	-0.92893	0.16576	-1.18429	-0.94936	-0.14059	-0.28177	0.12599	-0.21386		0.072	-0.5132	-2.78592	1.22524	2.54224	-2.25816	0.475291	-4.45102	2.19803	-1.77382		0.072	-1.18765	-0.548366	0.527652	-0.321746	1.19733	-0.101731	0.135575	-1.66068	-2.24418
0.07205	2.93794	-0.92622	0.15655	-1.14366	-0.94686	-0.15291	-0.28774	0.11959	-0.21336		0.07205	1.29659	-4.33048	2.30175	-3.04314	-1.6653	0.00724228	-4.98148	1.9484	0.59763		0.07205	-1.18072	-0.547633	0.520192	-0.32265	1.19322	-0.100762	0.13369	-1.64995	-2.23811
0.0721	2.94113	-0.92365	0.1471	-1.10313	-0.9441	-0.16522	-0.29377	0.11324	-0.21335		0.0721	0.594516	-4.53331	1.7869	-2.73111	-0.510782	-2.09898	-6.1672	0.715871	1.34651		0.0721	-1.1738	-0.547047	0.512653	-0.323559	1.18909	-0.0996769	0.131895	-1.63912	-2.23208
0.07215	2.94385	-0.92121	0.1374	-1.06271	-0.94108	-0.17752	-0.29984	0.10693	-0.21385		0.07215	-1.4337	-5.70343	1.92731	0.498425	2.37552	0.693714	-7.02529	1.35554	-0.0108338		0.07215	-1.1669	-0.546611	0.505036	-0.324472	1.18494	-0.0984753	0.130188	-1.62819	-2.22609
0.0722	2.94608	-0.9189	0.12747	-1.02242	-0.93781	-0.18982	-0.30597	0.10067	-0.21484		0.0722	-1.97975	-4.90775	2.86341	2.68265	3.63925	3.33039	-6.60405	2.36964	1.3153		0.0722	-1.16001	-0.546325	0.497343	-0.325388	1.18077	-0.0971585	0.128569	-1.61715	-2.22014
0.07225	2.94783	-0.91671	0.11729	-0.98226	-0.93428	-0.2021	-0.31216	0.09446	-0.21633		0.07225	-0.247972	-4.82974	3.23785	2.46423	1.2054	2.98715	-5.93318	2.19803	3.88957		0.07225	-1.15315	-0.546187	0.489578	-0.326307	1.17659	-0.0957266	0.127036	-1.60602	-2.21424
0.0723	2.9491	-0.91466	0.10689	-0.94225	-0.93049	-0.21437	-0.31839	0.08831	-0.21833		0.0723	0.391694	-6.3587	2.83221	2.29261	-0.604392	1.42699	-4.63824	0.435042	3.46833		0.0723	-1.1463	-0.546197	0.481741	-0.327227	1.17239	-0.0941811	0.12559	-1.59478	-2.20838
0.07235	2.94988	-0.91273	0.09626	-0.9024	-0.92644	-0.22663	-0.32468	0.0822	-0.22083		0.07235	0.235678	-5.93745	0.382752	3.64995	-1.30646	-1.13168	-4.15459	0.481847	3.04709		0.07235	-1.13949	-0.546355	0.473837	-0.328148	1.16818	-0.0925218	0.124231	-1.58345	-2.20257
0.0724	2.95018	-0.91093	0.0854	-0.86273	-0.92213	-0.23887	-0.33102	0.07615	-0.22384		0.0724	-0.0763544	-5.28218	-2.50355	1.26291	-2.00854	-2.78545	-5.71475	-0.0330068	5.40293		0.0724	-1.1327	-0.546658	0.465867	-0.329071	1.16396	-0.0907503	0.122958	-1.57203	-2.19681
0.07245	2.94999	-0.90924	0.07432	-0.82323	-0.91755	-0.2511	-0.33742	0.07016	-0.22735		0.07245	-2.27618	-6.87355	-2.33193	-0.172445	-4.58281	-0.944457	-5.88637	-1.32794	7.07231		0.07245	-1.12593	-0.547108	0.457834	-0.329994	1.15972	-0.0888658	0.121773	-1.56051	-2.19109
0.0725	2.94932	-0.90768	0.06302	-0.78394	-0.91271	-0.2633	-0.34388	0.06422	-0.23138		0.0725	-1.69892	-8.48052	-1.84828	2.46423	-2.46099	1.505	-5.48073	-1.04711	7.39994		0.0725	-1.1192	-0.547703	0.44974	-0.330918	1.15548	-0.0868698	0.120672	-1.5489	-2.18543
0.07255	2.94817	-0.90624	0.05151	-0.74485	-0.90761	-0.27548	-0.35039	0.05834	-0.23592		0.07255	0.610117	-6.65513	0.507565	4.33643	-1.13485	-0.382798	-5.02828	-1.03151	3.23431		0.07255	-1.11251	-0.548442	0.44159	-0.331841	1.15122	-0.0847623	0.119655	-1.5372	-2.17983
0.0726	2.94654	-0.90491	0.03978	-0.70598	-0.90224	-0.28764	-0.35695	0.05252	-0.24097		0.0726	3.16878	-6.21828	3.58109	2.10539	-2.13335	0.709316	-3.76455	-1.79599	-0.416476		0.0726	-1.10584	-0.549325	0.433382	-0.332763	1.14695	-0.0825456	0.118719	-1.52541	-2.17428
0.07265	2.94442	-0.9037	0.02786	-0.66735	-0.89661	-0.29978	-0.36357	0.04676	-0.24653		0.07265	2.3419	-7.51322	5.98374	-0.531282	-2.42978	4.18848	-4.71625	-2.68528	-0.74411		0.07265	-1.09922	-0.550349	0.425121	-0.333684	1.14266	-0.0802194	0.117864	-1.51354	-2.16879
0.0727	2.94182	-0.9026	0.01573	-0.62895	-0.89071	-0.31188	-0.37024	0.04106	-0.2526		0.0727	-0.825233	-8.97977	5.17245	-0.671697	-0.854018	4.78134	-4.70065	-2.95051	0.472817		0.0727	-1.09264	-0.551512	0.41681	-0.334602	1.13837	-0.0777864	0.117089	-1.50158	-2.16336
0.07275	2.93874	-0.9016	0.0034	-0.59081	-0.88454	-0.32396	-0.37697	0.03542	-0.25919		0.07275	-1.71453	-8.09048	3.58109	-0.531282	1.56423	2.79993	-3.85816	-3.35615	2.90667		0.07275	-1.0861	-0.552812	0.408452	-0.335515	1.13407	-0.0752473	0.116393	-1.48953	-2.15798
0.0728	2.93519	-0.90071	-0.00912	-0.55293	-0.87811	-0.336	-0.38376	0.02984	-0.26629		0.0728	-0.934444	-4.87654	0.819597	-2.10705	3.03079	2.62832	-3.71775	-2.8569	6.76027		0.0728	-1.0796	-0.554248	0.400048	-0.336422	1.12977	-0.0726027	0.115776	-1.4774	-2.15268
0.07285	2.93115	-0.89993	-0.02183	-0.51533	-0.87142	-0.34801	-0.3906	0.02433	-0.2739		0.07285	-0.294777	-3.59721	-1.31783	-4.5253	3.14	0.412885	-4.32621	0.138611	7.946		0.07285	-1.07316	-0.555817	0.391601	-0.337321	1.12545	-0.0698546	0.115238	-1.46519	-2.14744
0.0729	2.92664	-0.89925	-0.03472	-0.47801	-0.86445	-0.35999	-0.3975	0.01889	-0.28203		0.0729	-0.684818	-4.86094	-2.09791	-5.21177	3.32722	-2.3486	-5.60554	1.46475	7.88359		0.0729	-1.06677	-0.557519	0.38311	-0.338212	1.12113	-0.0670008	0.114779	-1.45291	-2.14227
0.07295	2.92166	-0.89866	-0.04779	-0.44099	-0.85722	-0.37192	-0.40445	0.0135	-0.29066		0.07295	-0.560005	-7.326	-0.97459	-1.37377	3.98249	-3.09748	-6.1672	0.591058	6.72907		0.07295	-1.06043	-0.559353	0.374578	-0.339093	1.11681	-0.0640437	0.114396	-1.44054	-2.13717
0.073	2.91621	-0.89817	-0.06103	-0.40427	-0.84973	-0.38382	-0.41146	0.00819	-0.2998		0.073	1.4214	-8.37131	0.850801	-0.344063	1.59544	-2.16138	-6.1516	1.19952	5.43413		0.073	-1.05415	-0.561318	0.366007	-0.339964	1.11248	-0.0609804	0.11409	-1.42811	-2.13214
0.07305	2.91028	-0.89777	-0.07444	-0.36787	-0.84196	-0.39567	-0.41852	0.00294	-0.30946		0.07305	4.68214	-7.74724	1.61528	-1.6234	-1.01003	0.27247	-7.38413	3.04051	4.81007		0.07305	-1.04793	-0.563411	0.357396	-0.340825	1.10814	-0.0578152	0.113859	-1.41559	-2.12718
0.0731	2.90388	-0.89745	-0.08801	-0.3318	-0.83393	-0.40748	-0.42564	-0.00225	-0.31962		0.0731	7.20961	-6.85795	2.14574	-1.7014	-0.978831	5.14018	-9.47475	2.05761	3.24991		0.0731	-1.04176	-0.565632	0.348747	-0.341676	1.1038	-0.0545468	0.113703	-1.40301	-2.1223
0.07315	2.89702	-0.89723	-0.10175	-0.29606	-0.82564	-0.41925	-0.43281	-0.00736	-0.33028		0.07315	5.2594	-7.07637	3.31586	-1.49858	0.986975	6.3103	-8.63226	0.481847	4.43563		0.07315	-1.03565	-0.567979	0.340062	-0.342517	1.09946	-0.0511733	0.113619	-1.39036	-2.11749
0.0732	2.8897	-0.89708	-0.11563	-0.26066	-0.81708	-0.43096	-0.44004	-0.01241	-0.34145		0.0732	5.71185	-5.50061	3.6903	-2.71551	2.65635	3.28358	-6.40123	0.325831	4.99729		0.0732	-1.02961	-0.570449	0.331343	-0.343346	1.09512	-0.0476941	0.113606	-1.37765	-2.11276
0.07325	2.88191	-0.89701	-0.12967	-0.22562	-0.80825	-0.44263	-0.44732	-0.0174	-0.35313		0.07325	2.62273	-3.06675	3.48748	-1.91983	3.42083	3.36159	-5.07509	2.22923	3.57754		0.07325	-1.02364	-0.573042	0.322594	-0.344165	1.09077	-0.0441106	0.113662	-1.36487	-2.1081
0.0733	2.87367	-0.89701	-0.14385	-0.19095	-0.79916	-0.45424	-0.45466	-0.02231	-0.3653		0.0733	-2.97826	-1.69381	2.801	-0.905721	2.2195	1.83263	-6.79127	3.58657	3.24991		0.0733	-1.01773	-0.575753	0.313814	-0.344971	1.08642	-0.0404238	0.113788	-1.35204	-2.10353
0.07335	2.86497	-0.89709	-0.15816	-0.15664	-0.7898	-0.46579	-0.46205	-0.02716	-0.37797		0.07335	-5.2561	-0.211655	1.02242	-1.54539	0.815357	1.31778	-8.32023	1.0123	1.12809		0.07335	-1.0119	-0.578583	0.30501	-0.345764	1.08208	-0.0366323	0.113982	-1.33914	-2.09904
0.0734	2.85582	-0.89723	-0.1726	-0.12271	-0.78018	-0.47729	-0.4695	-0.03194	-0.39113		0.0734	-3.80514	-1.22576	0.289142	-1.88862	1.70465	2.23828	-10.208	0.0450013	0.082776		0.0734	-1.00614	-0.581528	0.29618	-0.346543	1.07773	-0.0327373	0.114246	-1.3262	-2.09463
0.07345	2.84621	-0.89743	-0.18718	-0.08917	-0.7703	-0.48873	-0.477	-0.03665	-0.40478		0.07345	-1.82374	-3.16036	1.42806	-2.6219	3.98249	1.16176	-12.8603	-0.111015	0.519622		0.07345	-1.00046	-0.58459	0.287331	-0.347307	1.07337	-0.0287379	0.114578	-1.3132	-2.09031
0.0735	2.83616	-0.89769	-0.20187	-0.05603	-0.76015	-0.5001	-0.48455	-0.0413	-0.41893		0.0735	0.594516	-4.81414	3.28465	-1.40497	2.35992	1.19297	-8.81948	1.30873	0.0671744		0.0735	-0.994862	-0.587766	0.278465	-0.348054	1.06903	-0.0246352	0.114976	-1.30014	-2.08608
0.07355	2.82567	-0.89801	-0.21667	-0.02329	-0.74975	-0.51141	-0.49216	-0.04588	-0.43356		0.07355	1.54622	-6.3899	2.67619	0.623238	1.75145	2.76873	-7.16571	0.981099	-0.0108338		0.07355	-0.989341	-0.591056	0.269583	-0.348785	1.06468	-0.0204273	0.115439	-1.28704	-2.08193
0.0736	2.81474	-0.89838	-0.23158	0.00903	-0.73908	-0.52265	-0.49982	-0.05039	-0.44866		0.0736	2.3887	-8.05927	2.20814	-0.671697	2.2039	4.12607	-9.63076	0.201018	0.269996		0.0736	-0.983902	-0.594458	0.260688	-0.349497	1.06033	-0.0161157	0.115966	-1.27389	-2.07787
0.07365	2.80337	-0.8988	-0.2466	0.04094	-0.72815	-0.53383	-0.50753	-0.05483	-0.46425		0.07365	2.68513	-6.67073	0.663581	-3.29277	3.1556	2.75313	-9.63076	0.825083	3.31231		0.07365	-0.978549	-0.59797	0.251787	-0.350191	1.05599	-0.0116998	0.116557	-1.26069	-2.0739
0.0737	2.79156	-0.89925	-0.2617	0.07242	-0.71697	-0.54493	-0.51529	-0.05921	-0.48031		0.0737	2.02987	-4.61131	-0.802972	-1.6702	4.52854	-0.211181	-7.38413	2.01081	6.29222		0.0737	-0.973281	-0.601592	0.242882	-0.350865	1.05165	-0.00718104	0.11721	-1.24745	-2.07001
0.07375	2.77933	-0.89975	-0.2769	0.10346	-0.70553	-0.55595	-0.5231	-0.06352	-0.49684		0.07375	2.3731	-2.78592	-1.45824	-1.04614	3.62365	-0.804042	-6.65085	2.57247	8.64807		0.07375	-0.9681	-0.60532	0.233975	-0.351518	1.04732	-0.00255943	0.117927	-1.23417	-2.06622
0.0738	2.76667	-0.90028	-0.29219	0.13407	-0.69383	-0.5669	-0.53097	-0.06777	-0.51384		0.0738	2.3263	-1.33497	-3.39284	-2.34107	-0.0271312	0.210063	-6.60405	1.964	9.64657		0.0738	-0.963009	-0.609153	0.22507	-0.352149	1.04299	0.00216445	0.118707	-1.22085	-2.06251
0.07385	2.75359	-0.90084	-0.30755	0.16423	-0.68188	-0.57777	-0.53889	-0.07195	-0.53129		0.07385	-0.965647	-1.19456	-3.37724	-1.42058	-2.5858	1.98865	-7.86778	0.169814	8.30483		0.07385	-0.958006	-0.613089	0.216171	-0.352758	1.03866	0.00698748	0.11955	-1.2075	-2.0589
0.0739	2.74009	-0.90143	-0.32298	0.19394	-0.66968	-0.58855	-0.54685	-0.07607	-0.5492		0.0739	-1.83934	-0.866923	-1.037	1.29411	-2.67941	4.28209	-7.80537	-0.0174052	8.11761		0.0739	-0.953094	-0.617126	0.207283	-0.353345	1.03435	0.0119096	0.120456	-1.19413	-2.05538
0.07395	2.72618	-0.90204	-0.33847	0.22319	-0.65722	-0.59925	-0.55487	-0.08012	-0.56756		0.07395	-0.856436	1.42652	0.320345	0.997677	-0.791611	4.20408	-6.74446	1.85479	5.80857		0.07395	-0.948276	-0.62126	0.198408	-0.353908	1.03004	0.0169287	0.121425	-1.18072	-2.05195
0.074	2.71186	-0.90266	-0.35402	0.25197	-0.64452	-0.60986	-0.56294	-0.08411	-0.58637		0.074	-0.466395	1.39531	0.819597	-2.18505	0.331706	2.39429	-4.35741	4.24184	2.00178		0.074	-0.943549	-0.62549	0.189554	-0.354447	1.02574	0.0220448	0.122458	-1.1673	-2.04861
0.07405	2.69713	-0.9033	-0.36963	0.28028	-0.63157	-0.62038	-0.57105	-0.08804	-0.60562		0.07405	-1.19967	-0.960533	1.45926	-2.12265	1.33021	1.58301	-4.27941	3.68018	0.847256		0.07405	-0.938916	-0.629812	0.180723	-0.354959	1.02145	0.027255	0.123551	-1.15385	-2.04538
0.0741	2.68201	-0.90395	-0.38527	0.30812	-0.61838	-0.63081	-0.57922	-0.09191	-0.6253		0.0741	-1.4961	-2.84833	1.00682	-1.90423	2.1415	4.03246	-5.99558	3.99221	3.70235		0.0741	-0.934379	-0.634224	0.171919	-0.355444	1.01717	0.0325574	0.124705	-1.14039	-2.04224
0.07415	2.66648	-0.9046	-0.40096	0.33548	-0.60494	-0.64114	-0.58743	-0.09571	-0.64541		0.07415	-0.794029	-1.66261	0.0863207	-1.28016	3.14	4.68773	-7.80537	3.75819	8.22683		0.07415	-0.929936	-0.638725	0.163146	-0.355901	1.0129	0.0379506	0.125918	-1.12691	-2.03919
0.0742	2.65057	-0.90525	-0.41668	0.36235	-0.59126	-0.65137	-0.59569	-0.09946	-0.66594		0.0742	-1.40249	-0.0712402	-1.55185	-1.24896	2.42232	3.93885	-6.93168	0.497449	11.0039		0.0742	-0.925591	-0.643314	0.154408	-0.356326	1.00865	0.0434328	0.127189	-1.11342	-2.03625
0.07425	2.63427	-0.90589	-0.43242	0.38874	-0.57734	-0.6615	-0.60399	-0.10315	-0.68689		0.07425	-1.90174	-1.24136	-1.89509	-2.5907	1.28341	1.80143	-5.54314	-2.29524	10.0522		0.07425	-0.921343	-0.647987	0.145708	-0.356719	1.0044	0.0490028	0.128518	-1.09992	-2.0334
0.0743	2.61758	-0.90653	-0.44818	0.41463	-0.56318	-0.67153	-0.61235	-0.10678	-0.70825		0.0743	-0.247972	-1.08535	-1.0682	-3.87003	2.2039	1.44259	-5.73036	-3.02852	6.88509		0.0743	-0.917193	-0.652743	0.137051	-0.35708	1.00017	0.0546593	0.129905	-1.08641	-2.03065
0.07435	2.60052	-0.90715	-0.46395	0.44002	-0.54879	-0.68145	-0.62075	-0.11036	-0.73002		0.07435	3.44961	0.974069	-2.36314	-5.24297	3.01519	1.98865	-5.77716	-2.90371	5.01289		0.07435	-0.913142	-0.657579	0.128441	-0.357407	0.99596	0.0603999	0.131351	-1.0729	-2.02801
0.0744	2.58309	-0.90775	-0.47972	0.46491	-0.53416	-0.69126	-0.62919	-0.11388	-0.75218		0.0744	4.05808	0.334402	-3.06521	-4.77493	2.04789	3.33039	-6.21401	-1.39035	5.85538		0.0744	-0.909189	-0.662491	0.119881	-0.357701	0.991765	0.0662246	0.132853	-1.05939	-2.02547
0.07445	2.56529	-0.90833	-0.49549	0.4893	-0.51931	-0.70096	-0.63768	-0.11734	-0.77473		0.07445	2.49791	-0.601696	-2.09791	-5.35219	0.487723	3.00276	-6.02679	-0.813088	5.93339		0.07445	-0.905336	-0.667477	0.111374	-0.357962	0.987589	0.0721332	0.134412	-1.04588	-2.02303
0.0745	2.54712	-0.90888	-0.51126	0.51318	-0.50423	-0.71054	-0.64622	-0.12075	-0.79766		0.0745	-0.169964	-0.476883	-1.87948	-3.63601	-1.16605	1.42699	-4.66945	-0.220226	5.15331		0.0745	-0.901582	-0.672533	0.102924	-0.358191	0.983435	0.0781237	0.136028	-1.03237	-2.02069
0.07455	2.5286	-0.9094	-0.527	0.53654	-0.48892	-0.72001	-0.6548	-0.12412	-0.82097		0.07455	-1.02805	-1.22576	-2.59716	-3.88563	-1.46248	-0.320392	-4.43542	-0.688275	3.40592		0.07455	-0.897926	-0.677659	0.094534	-0.358385	0.979303	0.0841969	0.137701	-1.01887	-2.01846
0.0746	2.50973	-0.90989	-0.54272	0.5594	-0.47339	-0.72935	-0.66342	-0.12743	-0.84465		0.0746	1.3902	0.178386	-0.865379	-6.33509	-1.19725	-0.226782	-6.22961	1.35554	5.30932		0.0746	-0.894369	-0.68285	0.0862068	-0.358544	0.975196	0.0903533	0.139431	-1.00538	-2.01633
0.07465	2.49051	-0.91033	-0.55841	0.58174	-0.45764	-0.73857	-0.67209	-0.13069	-0.86869		0.07465	2.3887	2.31581	0.928809	-5.60181	0.238096	0.0228439	-6.52604	7.12814	7.54035		0.07465	-0.890911	-0.688103	0.0779454	-0.358667	0.971112	0.0965923	0.141219	-0.9919	-2.01431
0.0747	2.47095	-0.91073	-0.57406	0.60356	-0.44168	-0.74766	-0.6808	-0.13391	-0.89308		0.0747	0.890947	1.67614	2.31735	-4.4941	0.924568	1.25537	-4.35741	8.78191	8.77288		0.0747	-0.88755	-0.693416	0.0697533	-0.358751	0.967055	0.102914	0.143064	-0.978434	-2.01239
0.07475	2.45105	-0.91108	-0.58967	0.62486	-0.42551	-0.75662	-0.68955	-0.13708	-0.91781		0.07475	-1.38689	0.942866	1.06922	-2.93393	0.0352753	1.28658	-3.15609	5.38076	7.78998		0.07475	-0.88429	-0.698787	0.0616337	-0.358796	0.963024	0.10932	0.144964	-0.96498	-2.01058
0.0748	2.43083	-0.91137	-0.60523	0.64564	-0.40912	-0.76545	-0.69835	-0.14021	-0.94289		0.0748	-0.872037	0.584028	-1.30222	-1.01493	0.862162	2.4567	-5.24671	3.14973	5.37173		0.0748	-0.881127	-0.704214	0.0535895	-0.358802	0.959021	0.115807	0.146921	-0.951546	-2.00888
0.07485	2.41027	-0.91161	-0.62072	0.6659	-0.39253	-0.77414	-0.70718	-0.14329	-0.96829		0.07485	0.204475	-0.586094	-1.56745	-1.24896	2.81237	2.89354	-7.00969	0.247823	6.027		0.07485	-0.878063	-0.709696	0.0456247	-0.358768	0.955043	0.122375	0.148932	-0.938131	-2.00729
0.0749	2.3894	-0.91178	-0.63615	0.68563	-0.37573	-0.78269	-0.71606	-0.14633	-0.99402		0.0749	-0.70042	0.942866	1.56848	-4.07285	1.76706	3.89205	-5.04388	-1.03151	4.23281		0.0749	-0.875094	-0.715229	0.0377412	-0.358693	0.951092	0.129021	0.150996	-0.924738	-2.00581
0.07495	2.36821	-0.91188	-0.65151	0.70484	-0.35874	-0.7911	-0.72498	-0.14934	-1.02006		0.07495	-1.4493	2.98668	1.70889	-4.5409	0.84656	2.36309	-2.68804	0.591058	2.42302		0.07495	-0.872223	-0.720813	0.0299428	-0.358578	0.947171	0.135744	0.153113	-0.911371	-2.00445
0.075	2.34672	-0.91192	-0.66679	0.72352	-0.34155	-0.79937	-0.73394	-0.15231	-1.0464		0.075	0.578914	2.67465	0.523166	-4.36928	2.1883	1.25537	-3.76455	0.934294	1.53373		0.075	-0.869446	-0.726446	0.0222316	-0.358423	0.943278	0.142541	0.155282	-0.898031	-2.00319
0.07505	2.32492	-0.91188	-0.68198	0.74168	-0.32416	-0.80749	-0.74294	-0.15524	-1.07304		0.07505	1.3902	-0.430078	0.538768	-3.88563	4.1229	1.80143	-4.48223	0.825083	4.34202		0.07505	-0.866764	-0.732127	0.0146112	-0.358228	0.939413	0.14941	0.1575	-0.88472	-2.00205
0.0751	2.30282	-0.91176	-0.69708	0.75931	-0.30659	-0.81545	-0.75198	-0.15813	-1.09996		0.0751	-0.684818	-1.11655	2.14574	-3.44879	3.77967	4.14167	-4.93467	0.903091	5.79297		0.0751	-0.864174	-0.737854	0.00708322	-0.357995	0.935578	0.156347	0.159768	-0.871441	-2.00103
0.07515	2.28044	-0.91156	-0.71207	0.77642	-0.28883	-0.82327	-0.76106	-0.161	-1.12716		0.07515	-1.21527	1.20809	1.36565	-2.73111	2.68755	4.45371	-6.21401	0.232221	4.96609		0.07515	-0.861675	-0.743625	-0.000348877	-0.357725	0.931772	0.163351	0.162086	-0.858197	-2.00012
0.0752	2.25776	-0.91127	-0.72696	0.793	-0.27089	-0.83092	-0.77018	-0.16384	-1.15463		0.0752	-1.71453	3.36112	-1.62986	-2.34107	2.11029	3.62682	-7.91458	1.69877	2.82866		0.0752	-0.859268	-0.749439	-0.00768254	-0.357416	0.927997	0.17042	0.164452	-0.844988	-1.99933
0.07525	2.23481	-0.91088	-0.74173	0.80906	-0.25277	-0.83842	-0.77934	-0.16664	-1.18236		0.07525	-2.05776	4.29722	-2.87799	-2.82472	2.39112	4.07927	-9.17832	3.35255	0.488418		0.07525	-0.85695	-0.755293	-0.0149148	-0.35707	0.924249	0.177554	0.166865	-0.831815	-1.99865
0.0753	2.21159	-0.9104	-0.75638	0.82459	-0.23448	-0.84575	-0.78853	-0.16942	-1.21034		0.0753	-0.731623	3.01788	-3.26803	-2.32547	2.06349	3.50201	-8.16421	2.85329	2.48543		0.0753	-0.85472	-0.761186	-0.0220434	-0.356686	0.920532	0.184751	0.169325	-0.818682	-1.9981
0.07535	2.18809	-0.90983	-0.7709	0.8396	-0.21602	-0.85292	-0.79777	-0.17218	-1.23856		0.07535	-1.16847	0.677638	-1.92629	-1.73261	-0.666798	2.69072	-5.40272	4.27304	3.1563		0.07535	-0.852578	-0.767114	-0.0290652	-0.356265	0.916844	0.192012	0.171828	-0.80559	-1.99766
0.0754	2.16433	-0.90915	-0.78529	0.85409	-0.19739	-0.85992	-0.80704	-0.17491	-1.26701		0.0754	-2.05776	0.974069	0.507565	-0.531282	-0.604392	1.86384	-4.2326	4.50707	2.46983		0.0754	-0.850521	-0.773076	-0.0359801	-0.355808	0.913182	0.199335	0.174375	-0.79254	-1.99734
0.07545	2.14032	-0.90836	-0.79953	0.86807	-0.17861	-0.86675	-0.81635	-0.17763	-1.29568		0.07545	-2.86905	2.62784	1.28765	-1.77941	0.316105	2.30068	-3.90497	2.96251	2.57904		0.07545	-0.848548	-0.77907	-0.0427869	-0.355317	0.909547	0.206719	0.176964	-0.779536	-1.99714
0.0755	2.11606	-0.90746	-0.81362	0.88152	-0.15966	-0.8734	-0.82569	-0.18032	-1.32457		0.0755	-3.80514	2.58104	1.97412	-3.02754	2.85917	4.09487	-2.01717	1.0123	3.43713		0.0755	-0.846657	-0.785094	-0.0494854	-0.354793	0.905938	0.214162	0.179595	-0.766575	-1.99706
0.07555	2.09155	-0.90645	-0.82756	0.89446	-0.14056	-0.87987	-0.83508	-0.183	-1.35365		0.07555	-3.24349	2.11299	3.48748	-3.08995	4.04489	3.3928	-1.22149	-1.06271	1.48692		0.07555	-0.844848	-0.791145	-0.0560736	-0.354237	0.902353	0.221661	0.182268	-0.753663	-1.9971
0.0756	2.0668	-0.90532	-0.84133	0.90688	-0.12132	-0.88617	-0.8445	-0.18566	-1.38293		0.0756	-3.71153	2.269	1.8025	-4.88414	4.48174	2.09786	-3.49932	-2.23284	-0.572492		0.0756	-0.843119	-0.797221	-0.0625514	-0.353652	0.898794	0.229215	0.184983	-0.740798	-1.99727
0.07565	2.04182	-0.90407	-0.85494	0.9188	-0.10193	-0.89227	-0.85396	-0.18831	-1.41239		0.07565	-2.33859	2.05058	-0.802972	-7.69243	4.55975	2.94035	-5.87077	-1.23433	-0.541289		0.07565	-0.841471	-0.803322	-0.0689159	-0.353037	0.895261	0.236824	0.18774	-0.727984	-1.99755
0.0757	2.01661	-0.9027	-0.86836	0.9302	-0.0824	-0.8982	-0.86345	-0.19096	-1.44203		0.0757	-2.36979	2.44062	-1.62986	-7.4272	4.88738	4.64093	-8.39824	0.107408	1.03448		0.0757	-0.839901	-0.809446	-0.0751654	-0.352394	0.891754	0.244486	0.190539	-0.71522	-1.99796
0.07575	1.99119	-0.90119	-0.88161	0.9411	-0.06274	-0.90393	-0.87299	-0.19359	-1.47182		0.07575	-4.02357	4.11	-2.75318	-3.79202	2.28191	3.23678	-9.59956	2.19803	1.48692		0.07575	-0.838407	-0.815592	-0.081298	-0.351723	0.888272	0.2522	0.193379	-0.70251	-1.99848
0.0758	1.96554	-0.89956	-0.89466	0.9515	-0.04295	-0.90947	-0.88255	-0.19622	-1.50177		0.0758	-3.64913	2.65904	-5.17143	-3.5892	1.01818	1.09936	-8.94429	4.66308	1.78335		0.0758	-0.836989	-0.821758	-0.0873118	-0.351025	0.884813	0.259965	0.196259	-0.689854	-1.99912
0.07585	1.93969	-0.8978	-0.90752	0.96141	-0.02303	-0.91481	-0.89216	-0.19884	-1.53186		0.07585	1.00016	0.69324	-4.79699	-5.60181	3.84207	3.09636	-7.21251	3.72699	2.17339		0.07585	-0.835644	-0.827942	-0.0932045	-0.350301	0.881378	0.267777	0.199178	-0.677255	-1.99988
0.0759	1.91364	-0.89589	-0.92018	0.97081	-0.003	-0.91996	-0.9018	-0.20146	-1.56208		0.0759	6.1955	0.724443	-2.89359	-8.42571	3.51444	6.13868	-5.58994	3.60217	1.45572		0.0759	-0.83437	-0.834141	-0.098975	-0.349551	0.877966	0.275633	0.202136	-0.664712	-2.00075
0.07595	1.88739	-0.89385	-0.93262	0.97973	0.01715	-0.92491	-0.91148	-0.20409	-1.59242		0.07595	7.50604	0.552825	-0.412931	-10.3603	-0.339164	6.24789	-4.56023	4.8035	0.50402		0.07595	-0.833166	-0.840354	-0.104622	-0.348776	0.874578	0.283531	0.205132	-0.65223	-2.00174
0.076	1.86095	-0.89166	-0.94486	0.98816	0.03741	-0.92965	-0.92119	-0.20671	-1.62287		0.076	3.59003	-0.601696	0.882004	-9.19019	-3.08505	5.03097	-5.1843	5.67719	1.05008		0.076	-0.832032	-0.846578	-0.110145	-0.347977	0.871215	0.291469	0.208164	-0.639809	-2.00284
0.07605	1.83433	-0.88933	-0.95687	0.99611	0.05778	-0.93418	-0.93094	-0.20934	-1.65342		0.07605	-0.0763544	0.552825	1.49047	-8.56612	-3.27227	3.76723	-4.95028	5.52117	3.74916		0.07605	-0.830963	-0.852812	-0.115544	-0.347155	0.867876	0.299445	0.211232	-0.627453	-2.00405
0.0761	1.80752	-0.88686	-0.96865	1.00358	0.07825	-0.9385	-0.94072	-0.21198	-1.68406		0.0761	-3.16548	1.70735	0.601174	-8.30089	-0.978831	3.76723	-3.03127	4.33545	4.71646		0.0761	-0.829962	-0.859055	-0.120817	-0.34631	0.864561	0.307459	0.214334	-0.615162	-2.00537
0.07615	1.78055	-0.88423	-0.9802	1.01058	0.0988	-0.94261	-0.95055	-0.21463	-1.71479		0.07615	-6.09858	0.287597	0.133126	-8.06687	1.82946	3.4708	-3.71775	2.83769	4.29522		0.07615	-0.829026	-0.865305	-0.125963	-0.345441	0.861271	0.315507	0.217468	-0.602938	-2.0068
[truncated: 58,477 more rows]

## Sheet: Fig.8b
ON Responses (pA)
WT ON
[truncated: 66 more rows]

## Sheet: Fig.8c
WT					G369i KI
	Condition					Condition
[truncated: 70,002 more rows]

## Sheet: Fig.8d
WT	Control	DNQX	Wash		G369i KI	Control	DNQX	Wash
[truncated: 5 more rows]
