# Supplementary material for: A non-conducting role of the Cav1.4 Ca2+ channel drives homeostatic plasticity at the cone photoreceptor synapse
Source: eLife. 2024 Nov 12;13:RP94908. doi: 10.7554/eLife.94908 (PMC11556788; doi:10.7554/eLife.94908)
Supplement: Figure 9—source data 1. [file elife-94908-fig9-data1.xlsx]

## Sheet: Fig9b
Time (s)	WT1	WT2	WT3	WT4	WT5	WT6	WT7	WT8	WT9	WT10	WT11			Time (s)	KI1	KI2	KI3	KI4	KI5	KI6	KI7	KI8	KI9	KI10	KI11	KI12	KI13	KI14	KI15	KI16
0	2278.56	1646.8	973.662	1552.82	1177.95	633.485	1127.52	732.009	845.53	809.26	1328.83			0	6547.98	2126.86	1285.29	1049.84	1353.74	1466.68	1227.55	4400.41	4366.58	1230.44	1134.73	1229.32	2193.15	1403.21	724.164	1255.88
0.9375	2288.16	1610.62	979.357	1528.21	1130.73	706.543	1162.56	750.987	876.094	853.11	1378.8			0.9375	6588.93	2133.59	1227.32	1059.7	1355.01	1441.71	1268.85	4303.04	4344.71	1311.85	1185.89	1195.18	2153.85	1384.24	687.843	1262.71
1.875	2351.63	1574.6	992.331	1607.85	1165.62	657.904	1120	724.47	892.708	856.398	1431.06			1.875	6560.13	2154.67	1252.66	1108.66	1363.54	1357.86	1225.52	4302.5	4405.87	1221.47	1133.01	1180.54	2134.42	1408.86	778.403	1210.99
2.8125	2282.09	1608.62	974.757	1494.63	1139.82	666.357	1117.3	764.5	801.891	894.182	1435.65			2.8125	6412.86	2235.22	1245.02	1037.02	1338.75	1381.43	1214.15	4226.29	4590.6	1255.62	1145.83	1239.79	2138.54	1424.64	725.336	1212.24
3.75	2250	1607.03	949.767	1490.24	1084.18	661.382	1112.85	742.388	857.008	847.295	1389.04			3.75	6443.31	2293.39	1274.02	1050.95	1350.95	1355.67	1303.38	4385.66	4566.22	1243.92	1240.68	1186.71	2212.02	1450.73	713.073	1264.96
4.6875	2295.58	1585.72	982.129	1598.01	1087.15	704.467	1113.33	759.658	814.263	837.158	1438.18			4.6875	6419.54	2292.25	1277.6	1058.2	1392.09	1404.26	1252.29	4286.51	4518	1290.49	1181.77	1186.5	2203.95	1498.33	704.492	1232.67
5.625	2379.74	1652.56	946.543	1622.77	1194.83	667.22	1147.43	729.284	807.702	882.751	1386.59			5.625	6327.09	2220.49	1303.54	1057.67	1379.65	1365.14	1274.21	4260.65	4373.34	1277.79	1169.69	1204.6	2243.15	1459.32	703.466	1168.89
6.5625	2440.65	1632.74	940.332	1617.39	1184.93	672.067	1104.94	749.9	818.137	801.236	1363.78			6.5625	6348.67	2133.52	1252.74	1078.19	1409.44	1470.33	1282.53	4322.15	4450.29	1267.1	1240.25	1178.53	2183.88	1437.74	720.906	1224.99
7.5	2328.8	1666.89	985.565	1624.04	1128.87	705.503	1143.58	770.859	891.228	843.986	1442.08			7.5	6328.02	2252.08	1301.25	1026.96	1420.95	1526.67	1289.26	4189.44	4501.18	1228.28	1180.02	1163.11	2184.11	1447.36	746.67	1206.44
8.4375	2330.46	1672.65	976.474	1619.13	1160.47	655.255	1154.07	723.693	850.852	822.808	1370.21			8.4375	6429.28	2285.66	1277.74	1063.5	1366.02	1432.78	1259.8	4265.33	4392.7	1211.45	1194.59	1148.85	2157.26	1381.46	736.132	1288.73
9.375	2286.61	1664.77	940.968	1547.52	1127.54	715.207	1182.51	725.865	849.686	858.811	1420.32			9.375	6385.91	2273.86	1279.4	1000.77	1388.81	1482.49	1267.55	4314.09	4456.35	1267.99	1290.73	1193.78	2213.16	1397.2	690.097	1282.87
10.3125	2351.53	1650.8	923.661	1586.62	1144.01	716.475	1091.2	721.935	828.136	858.153	1445.09			10.3125	6303.62	2320.13	1214.89	1085.74	1370.12	1429.59	1278.26	4323.77	4407.43	1262.98	1172.39	1236	2285.65	1360.76	755.184	1316.85
11.25	2332.39	1582.91	971.617	1550.12	1122.46	632.229	1152.25	775.155	801.947	800.115	1394.75			11.25	6379.45	2284.6	1316.33	1111.1	1431.37	1421.58	1270.53	4282.81	4468.27	1266.79	1202.93	1235.67	2217.06	1406.77	731.76	1284.68
12.1875	2240.5	1589.37	920.523	1546.44	1152.98	681.231	1167.03	761.687	851.441	826.753	1440.59			12.1875	6350.73	2223.36	1291.17	1095.36	1395.31	1436.39	1303.65	4284.16	4445.66	1255.66	1197.96	1244.58	2191.22	1452.13	738.616	1215.64
13.125	2303.12	1624.08	917.147	1541.28	1117.42	708.249	1150.88	757.386	893.767	887.257	1440.6			13.125	6320.06	2228.56	1335.72	1126.82	1445.74	1469.08	1281.69	4192.4	4398.39	1281.82	1161.01	1192.15	2141.13	1339.07	716.659	1223.85
14.0625	2300.31	1582.28	957.963	1565.76	1156.37	675.709	1185.25	707.568	853.092	825.578	1424.56			14.0625	6298.91	2240.53	1299.73	1088.46	1439.72	1442.83	1289.77	4301.48	4444.99	1257.8	1206.03	1268.38	2086.9	1417.44	697.744	1228.9
15	2339.55	1653.81	950.507	1571.39	1173.65	697.548	1232.55	771.659	819.333	822.225	1452.94			15	6415.13	2198.91	1318.22	1043.05	1435.84	1425.16	1288.96	4170.44	4315.22	1204.67	1109.24	1220.21	2190.99	1469.29	714.079	1277.06
15.9375	2379.3	1637.62	919.766	1552.55	1141.6	671.537	1139.3	737.744	839.225	860.962	1438.43			15.9375	6297.4	2256.97	1300.89	1093.4	1393.59	1449.14	1271.57	4248.12	4421.59	1238.49	1182.78	1191.8	2198.26	1428.7	713.732	1220.79
16.875	2359.51	1718.64	958.562	1654.68	1166.02	736.373	1211.71	675.042	792.261	833.895	1410.15			16.875	6356.02	2189.47	1266.56	1034.31	1356.9	1423.57	1268.72	4278.41	4289.42	1247.59	1192.11	1259.66	2181.91	1427.97	769.248	1282.86
17.8125	2386	1641.74	1008.34	1529.56	1139.37	748.965	1120.72	760.4	879.899	858.359	1458.23			17.8125	6228.92	2142.34	1308.42	1028.51	1416.95	1394.19	1260.16	4288.26	4424.15	1251.14	1148.04	1256.13	2120.31	1422.52	731.39	1302.9
18.75	2266.64	1612.75	990.572	1568.94	1162.8	679.917	1153.32	740.222	834.462	818.252	1456.55			18.75	6440.77	2195.78	1277.32	1063.14	1445.47	1443.23	1228.08	4329.38	4291.41	1288.7	1145.71	1258.02	2159.57	1446.12	732.005	1275.98
19.6875	2379.79	1636.75	965.742	1571.72	1144.31	730.192	1172.97	690.335	848.927	826.524	1393.3			19.6875	6234.43	2217.17	1240.87	1099.47	1508.49	1455.4	1255.31	4195.42	4423.6	1275.3	1146.98	1227.31	2196.96	1420.77	724.297	1214.66
20.625	2271.01	1608.76	950.586	1688.42	1183.66	726.811	1148.59	733.969	805.464	808.101	1390.85			20.625	6273.55	2287.22	1329.98	1088.18	1426.32	1407.54	1259.01	4259.82	4336.62	1319.34	1214.58	1254.67	2171.79	1466.69	719.479	1286.38
21.5625	2360.42	1627.68	914.384	1569.38	1207.59	671.413	1084.35	735.231	861.584	850.934	1476.43			21.5625	6266.32	2263.19	1288.94	1057.31	1385.59	1381.44	1272.76	4224.08	4429.68	1242.66	1148.2	1187.94	2204	1447.63	778.472	1268.61
22.5	2197.84	1680.77	1009.12	1596.47	1137.98	680.128	1205.19	744.676	826.947	806.029	1436.53			22.5	6148.38	2243.84	1313.33	1066.58	1404.92	1415.87	1268.22	4193.16	4357.23	1308.46	1152.69	1201.98	2163.9	1401.9	723.552	1278.19
23.4375	2219.03	1619.28	985.196	1570.08	1159.42	690.308	1148.3	752.564	834.084	831.357	1404.52			23.4375	6241.06	2122.47	1319.33	1066.82	1400.09	1476.97	1262.12	4221.7	4270.92	1334.33	1190.04	1235.23	2239.41	1453.16	773.971	1315.29
24.375	2236.2	1704.09	952.418	1562.81	1138.21	712.643	1140.74	708.171	841.513	808.8	1448.05			24.375	6310.9	2280.77	1263.9	1055.69	1427.68	1499.99	1337.1	4221.12	4349.07	1306.4	1181.37	1220.5	2199.86	1379.42	714.756	1310.36
25.3125	2286.43	1737.15	976.67	1601.99	1095.75	704.442	1142.84	728.306	857.186	779.14	1422.72			25.3125	6233.02	2228.22	1306.4	1001.93	1456.59	1457.12	1230.02	4175.79	4320.48	1329.59	1140.68	1254.89	2218.12	1453.6	746.431	1295.02
26.25	2228.32	1682.5	982.75	1551.62	1159.99	702.215	1146.87	741.533	825.051	795.945	1473.34			26.25	6175.34	2226.17	1342.91	1057.6	1482.07	1520.1	1266.06	4200.83	4332.3	1236.28	1113.18	1175.68	2210.29	1436.59	748.014	1228.74
27.1875	2280.4	1705.91	980.993	1541.99	1156.15	666.665	1134.21	782.742	824.891	814.017	1435.83			27.1875	6249.84	2278.81	1270.18	1094.01	1388.03	1443.95	1287.26	4125.07	4411.06	1313.76	1133.28	1189.48	2138.56	1398.99	759.855	1300.15
28.125	2273.76	1619.45	1009.44	1620.52	1096.32	732.907	1193.1	712.494	856.536	767.575	1510.47			28.125	6138.16	2305.31	1251.7	1052.97	1435.33	1543.67	1284.59	4239.71	4271.25	1258.45	1134.87	1184.41	2132.44	1414.27	744.265	1260.82
29.0625	2235.71	1699.78	1003.69	1640.24	1127.48	737.143	1098.3	768.833	851.513	807.447	1408.79			29.0625	6066.25	2369.11	1268.19	1029.55	1447.99	1562.91	1288.01	4293.32	4383.65	1307.07	1188.09	1243.31	2110.72	1407.9	731.417	1310.16
30	2269.96	1694.82	1021.24	1552.12	1133.09	687.072	1144.84	741.906	840.926	803.83	1448.16			30	6186.52	2303.43	1228.54	973.706	1318.5	1466.6	1315.88	4218.2	4229.88	1324.35	1161.66	1254.42	2149.5	1452.43	773.542	1262.25
30.9375	2295.96	1637.63	956.26	1560.5	1146.7	694.575	1146.91	747.295	847.121	790.133	1463.31			30.9375	6039.91	2272.29	1308.85	1021.85	1439.88	1523.47	1238.45	4189.07	4401.76	1308.29	1150.78	1296.24	2168.78	1461.52	746.968	1316.13
31.875	2305.27	1650.42	987.333	1513.53	1146.34	707.161	1168.92	741.91	888.097	790.063	1480.89			31.875	6073.76	2215.71	1364.03	1051.72	1408.51	1527.3	1272.17	4259.88	4436.95	1295.62	1130.26	1213.07	2112.59	1497.07	716.189	1315.5
32.8125	2236.42	1639.47	1004.08	1544.2	1101.76	684.486	1152	742.911	845.035	804.629	1435.58			32.8125	6152.23	2282.46	1343.38	1086.63	1433.66	1551.3	1274.82	4253.96	4415.61	1270.15	1236.9	1251.42	2173.78	1437.98	721.609	1334.66
33.75	2288.33	1606.69	935.229	1582.37	1124.31	673.437	1117.56	757.171	808.795	820.737	1396.42			33.75	6121.9	2323.03	1365.46	1073.33	1436.31	1528.71	1307.2	4241.64	4297.79	1312.43	1195.66	1284.29	2150.52	1425.57	783.044	1290.59
34.6875	2232.17	1633.4	1000.83	1530.23	1117.15	693.492	1203.16	719.598	806.679	786.845	1433.39			34.6875	6109.62	2210.04	1330.47	1047.75	1439.99	1454.48	1271.18	4203.88	4418.66	1325.47	1272.95	1260.42	2234.58	1562.19	767.055	1332.75
35.625	2220.35	1678.87	1020.64	1504.52	1138.7	662.434	1166.69	762.737	831.701	765.283	1420.85			35.625	6045.5	2247.42	1382.56	1072.68	1527.52	1554.54	1342.3	4161.57	4538.62	1346.58	1226.82	1300.46	2190.23	1484.97	762.676	1391.04
36.5625	2244.19	1665.96	1044.75	1540.21	1124.48	692.148	1188.18	732.092	804.546	779.988	1463.19			36.5625	6075.87	2330.72	1408	1100.13	1560.89	1574.42	1293.16	4142.63	4342.52	1356.09	1265.82	1313.14	2151.85	1517.37	769.782	1324.54
37.5	2276.41	1674.91	1029.88	1574.86	1119.09	713.121	1081.76	723.103	791.333	784.047	1357.3			37.5	6101.5	2220.08	1348.53	1112.23	1492.44	1523.11	1311.59	4208.67	4429.43	1367.48	1267.7	1321.21	2242.27	1478.82	756.641	1348.75
38.4375	2294.59	1668.45	1044.9	1561.43	1180.09	713.528	1137.63	709.872	827.571	796.289	1457.59			38.4375	6074.98	2217.75	1370.42	1064.45	1559.05	1584.01	1249.53	4278.35	4619.02	1375.04	1246.21	1375.55	2276	1580.79	784.548	1354.38
39.375	2269.44	1686.55	1075.27	1637.11	1160.21	719.186	1053.02	754.469	848.883	783.277	1431.07			39.375	6035.81	2163.47	1443.79	1050.29	1600.4	1535.02	1257.28	4323.32	4489.32	1410.46	1283.38	1408.95	2252.01	1513.99	841.435	1371.06
40.3125	2237.52	1654.08	1140.61	1638.83	1162.06	747.999	1151.14	730.995	834.144	825.18	1485.45			40.3125	6100.19	2257.1	1402.56	1089.86	1661.3	1545.41	1225.01	4252.21	4467.64	1383.08	1262.3	1422.91	2287.99	1473.04	851.073	1350.47
41.25	2226.64	1761.37	1147.09	1736.54	1153.27	724.116	1236.09	762.119	867.011	842.424	1533.35			41.25	6134.49	2293.1	1348.04	1116.24	1516.86	1575.08	1269.65	4317.95	4289.14	1455.22	1344.17	1503.25	2230.5	1610.97	889.772	1440.04
42.1875	2278.61	1731.65	1131.93	1733.78	1246.36	719.691	1182.51	830.047	893.864	889.467	1678.55			42.1875	6175.28	2163.28	1389.2	1172.55	1525.02	1524.69	1228.65	4249.2	4563.89	1433.68	1316.53	1446.53	2203.72	1570.91	860.653	1450.89
43.125	2309.99	1809.97	1221.81	1782.33	1226.84	770.824	1265.94	907.125	1004.57	1095.16	1865.83			43.125	6214.7	2331.28	1378.88	1117.6	1562.08	1536.78	1232.21	4297.46	4542.58	1525.71	1398.35	1444.09	2271.48	1573.69	892.6	1415.34
44.0625	2342.69	1783.91	1275.01	1808.1	1351.59	861.349	1291.33	1027.53	1102.26	1201.2	2169.28			44.0625	6094.74	2314.55	1431.2	1157.03	1568.72	1508.91	1221.45	4216.19	4485.22	1482.63	1398.77	1474.71	2307.77	1575.02	885.049	1393.59
45	2347.95	1980.82	1427.71	1900.08	1409.36	923.447	1405.44	1226.24	1285.19	1323.5	2276.64			45	6157.25	2329.04	1373.99	1114.77	1544.81	1527.23	1242.1	4157.09	4384.1	1558.87	1389.03	1424.07	2274.4	1590.94	814.482	1450.18
45.9375	2376.52	2075.53	1499.44	1976.08	1437.22	969.491	1498.72	1337.76	1407.68	1510.35	2504.38			45.9375	6200.03	2387.47	1367.92	1049.24	1528.25	1411.35	1253.95	4284.84	4449.18	1511.54	1396.47	1507.5	2333.36	1578.21	846.163	1428.67
46.875	2301.83	2029.27	1609.86	1968.85	1567.19	1045.88	1644.02	1487.97	1504.9	1655.11	2802.75			46.875	6048.55	2362.39	1356.73	1094.04	1540.56	1516.82	1220.26	4254.91	4425.89	1501.43	1374.57	1492.45	2234.98	1627.07	843.409	1447.03
47.8125	2454.82	2132.89	1697.7	2128.46	1583.25	1116.36	1845.5	1646.43	1624.97	1803.29	2936.97			47.8125	5987.99	2495.45	1341.13	1037.74	1500.67	1543.75	1225.44	4307.82	4314.6	1490.3	1467.93	1466.91	2284.24	1590.17	836.312	1537.03
48.75	2460.66	2221.9	1877.83	2341.74	1708.71	1249.13	1930.65	1753.57	1640.72	1835.58	2901.34			48.75	6033.6	2508.64	1362.19	1159.96	1489.7	1514.3	1256.79	4220.8	4368.32	1506.82	1454.34	1472.57	2273.04	1542.17	811.342	1510.91
49.6875	2533.85	2422.7	2008.06	2476.36	1953.88	1305.03	1936.22	1789.46	1630.86	1911.49	2967.47			49.6875	5932.9	2334.66	1384.87	1084.72	1574.65	1554.34	1243.57	4288.1	4384.73	1531.54	1468.45	1493.93	2332.27	1608.58	834.097	1522.66
50.625	2583.03	2631.38	2136.9	2783.62	2116.4	1328.61	2000.12	1866.76	1708.34	1900.55	2995.38			50.625	6136.77	2374.43	1384.81	1134.04	1567.91	1550.52	1268.93	4220.76	4465.84	1551.95	1454.39	1482.72	2340.76	1563.58	875.126	1483.8
51.5625	2552.39	2724.26	2450.37	2964.65	2248.38	1284.57	2057.94	1862.31	1704.85	1934.72	2936.94			51.5625	5979.08	2298.51	1435.94	1052.68	1470.19	1578.53	1264.79	4108.73	4418.41	1518.53	1468.26	1453.34	2281.03	1613.29	825.936	1444.79
52.5	2702.3	2768.39	2585.21	3160.68	2408.04	1372.13	2042.1	1933.74	1742.82	1917.9	2910.84			52.5	6009.62	2442.56	1338.7	1096.96	1528.3	1542.69	1268.43	4213.42	4350.32	1544.38	1477.16	1451.56	2321.76	1602.75	852.889	1522.42
53.4375	2802.34	2875.32	2766.05	3274.26	2571.46	1342.66	1966.92	1900.78	1682.87	1951.07	2928.16			53.4375	5972.74	2502.29	1338.38	1063.94	1552.29	1546	1282.46	4201.1	4413.84	1537.52	1447.61	1532.93	2365.41	1616.25	890.989	1489.58
54.375	2849.14	3037.03	2793.86	3359.87	2702.71	1363.26	2013.38	1863.51	1698.2	1917.25	2925.15			54.375	5979.41	2507.48	1378.03	1073.92	1596.08	1556.12	1245.79	4261.96	4338.52	1491.76	1474.95	1514.5	2307.43	1555.42	823.326	1511.38
55.3125	2836.87	3085.78	2849.66	3582.5	2869.19	1383.41	2011.09	1832.39	1645.76	1862.79	2914.03			55.3125	5876.95	2511.63	1455.08	1061.29	1582.19	1555.84	1250.68	4168.01	4245.9	1473.12	1372.8	1443.55	2402.46	1641.04	832.174	1433.54
56.25	2938.3	3128.82	2914.14	3609.32	2937.35	1324.7	1948.49	1817.99	1594.57	1814.89	2898.29			56.25	5903.43	2480.52	1348.19	1124.37	1581.13	1596.86	1300.88	4163.24	4328.05	1447.09	1332.92	1477.97	2292.53	1552.84	814.543	1410.95
57.1875	2996.34	3086.1	2957.11	3668.78	2933.08	1292.66	1933.14	1787.83	1625.06	1810.62	2894.07			57.1875	5938.11	2468.34	1377.89	1034.45	1530.33	1574.38	1283.75	4072.87	4257.07	1494.41	1384.57	1435.24	2236.44	1595.85	798.565	1405.99
58.125	2947.34	3182.8	2943.83	3645.46	2909.84	1361.56	1894.03	1768.3	1543	1682.6	2805.69			58.125	5869.56	2423.15	1343.38	1091.55	1571.02	1500.66	1223.73	4113.83	4267.24	1452.3	1412.99	1494.07	2286.93	1535.08	820.075	1427.04
59.0625	2920.01	3093.4	2963.86	3700.65	3002.68	1341.63	1926.62	1675.31	1458.07	1743.74	2747.51			59.0625	5905.52	2389.2	1409.18	1080.8	1547.78	1490.14	1264.62	4092.16	4135.55	1488	1469.57	1481.92	2360.72	1636.65	801.146	1457.95
60	2976.52	3162.7	2958.39	3634.3	2949.5	1354.99	1943.43	1651.35	1436.26	1654.19	2797.6			60	5831.02	2530.46	1363.91	1007	1564.13	1571.08	1264.32	4077.29	4280.72	1450.26	1374.14	1467.55	2358.34	1550.66	809.376	1385.02
60.9375	2958.26	3165.09	2906.72	3605.34	2890.23	1327.12	1836.78	1611.85	1390.41	1589.99	2815.88			60.9375	5834.54	2447.56	1388.6	1071.99	1465.56	1513.63	1286.21	4161.74	4264.36	1484.31	1431.79	1439.42	2325.71	1517.15	823.437	1438.86
61.875	2961.22	3088.46	2875.94	3558.91	2786.39	1290.83	1944.42	1586.86	1340.66	1494.8	2831.13			61.875	5928.49	2495.2	1366.03	1038.46	1594.91	1559.51	1248.47	4184.79	4375.92	1463.4	1446.53	1470.4	2380.72	1574.54	850.374	1488.56
62.8125	2930.49	3111.38	2887.5	3514.03	2767.34	1253.06	1796.03	1586.83	1314.96	1526.04	2796.15			62.8125	5869.85	2477.65	1321.74	1022.33	1550.45	1507.33	1281.59	4132.61	4389.01	1470.39	1422.31	1448.88	2313.7	1531.8	851.656	1442.91
63.75	2821.27	3094.55	2811.28	3530.65	2620.05	1324.76	1916.47	1590.75	1295.38	1562.12	2735.18			63.75	5717.99	2390.92	1286.94	1013.05	1437.35	1513.51	1234.18	4118.91	4334.53	1510.13	1459.5	1479.35	2338.76	1521.05	846.288	1503.92
64.6875	2890.95	3047.01	2741.15	3612.17	2635.18	1299.62	1903.28	1628.31	1256.56	1606.57	2667.3			64.6875	5810.31	2498.77	1313.44	1036.21	1453.77	1536.37	1302.53	4071.17	4288.81	1488.2	1408.11	1508.12	2355.64	1553.87	803.298	1433.52
65.625	2825.87	3065.61	2615.62	3564.86	2655.37	1302.94	1919.89	1592.49	1301.65	1532.59	2703.87			65.625	5877.29	2483.52	1314.22	1050.08	1446.57	1483.05	1199.52	4153.28	4169.42	1496.46	1418.82	1458.61	2279.83	1507.57	793.904	1454.66
66.5625	2825.2	2961.08	2554.29	3544.54	2664.56	1276.69	1900.59	1593.92	1313.57	1576.86	2701.28			66.5625	5762.8	2450.55	1310.22	1077.73	1503.9	1493.85	1222.86	4111.68	4195.34	1505.08	1471.34	1499.25	2321.39	1592.46	856.058	1397.43
67.5	2824.19	2972.39	2440.71	3578.06	2637.12	1310.42	1939.88	1627.19	1303.3	1580.23	2730.33			67.5	5822.41	2459.38	1294.73	1056.9	1447.67	1543.6	1259.36	4092.32	4296.77	1475.71	1394.91	1506.06	2313.17	1533.72	808.572	1505.23
68.4375	2767.64	2940.09	2482.44	3456.77	2775.43	1317.2	2022.88	1560.76	1286.71	1650.19	2675.48			68.4375	5733.06	2519.43	1297.41	1075.49	1501.98	1475.45	1215.56	3955.85	4322.03	1484.09	1465.37	1517.49	2276.93	1531.4	833.213	1456.52
69.375	2732.08	2934.03	2407.12	3433.96	2813.66	1299.09	1974.9	1621.49	1205.39	1568.12	2728			69.375	5750.06	2477.6	1312.22	1036.07	1476.56	1474.37	1228.9	4091.37	4288.81	1505.27	1516.64	1548.51	2344.39	1559.74	873.353	1460.53
70.3125	2739.51	2887.34	2465.14	3326.32	2786.41	1366.19	1952.97	1610.63	1272.85	1657.24	2844.42			70.3125	5724.57	2588.84	1286.87	1034.61	1412.57	1522.9	1230.78	4045.89	4285.82	1487.31	1466.72	1494.76	2250.8	1534.43	839.612	1474.44
71.25	2857.55	2782.26	2459.73	3270.43	2889.23	1362.03	2005.43	1621.68	1315.84	1642.65	2825.7			71.25	5590.93	2497.37	1325.13	1002.88	1375.64	1543.46	1197.33	4161.97	4159.85	1468.88	1504.46	1482.31	2302.97	1565.88	821.501	1415.72
72.1875	2849.41	2770.87	2475.13	3346.08	2890.72	1336.07	2041.67	1627.4	1343.39	1640.3	2693.73			72.1875	5592.01	2530.17	1295.77	994.643	1507.11	1591.37	1207.27	4110.9	4256.33	1492.15	1405.37	1469.35	2287	1553.41	842.344	1449.41
73.125	2901.93	2688.42	2417.68	3279.24	2784.41	1337.27	1995.23	1622.61	1266.85	1614.05	2755.02			73.125	5594.09	2481.28	1406.28	1024.59	1421.1	1461.9	1162.63	3952.97	4222.28	1436.96	1369.43	1467.2	2293.24	1524.45	754.12	1492.97
74.0625	2795.81	2741.17	2420.57	3206.83	2842.01	1294.71	1855.95	1603.18	1278.79	1660.21	2714.99			74.0625	5532.5	2363.91	1294.33	1019.87	1411.34	1548.52	1197.21	3978.99	4310.49	1478.31	1444.96	1461.58	2253.59	1574.56	821.451	1468.35
75	2895.03	2730.48	2434.96	3248.9	2871.33	1273.22	1881.26	1625.74	1271.29	1630.28	2753.43			75	5660.96	2431.89	1266.62	1048.06	1426.11	1475.66	1194.11	3898.38	4250.55	1463.4	1412.71	1468.17	2301.73	1601.84	824.983	1442.92
75.9375	2854.93	2672.83	2394.66	3230.33	2892.74	1253.56	1996.21	1594.5	1274.13	1649.6	2790.04			75.9375	5462.21	2450.45	1340.91	1066.66	1415	1417.67	1173.95	4017.23	4262.6	1468.4	1401.39	1482.77	2284.31	1617.62	825.157	1349.7
76.875	2849.15	2716.87	2460.76	3175.04	2836.68	1238.37	1901.82	1619.05	1281.51	1592.96	2727.44			76.875	5496.48	2404.61	1306.16	974.557	1482.2	1458.94	1187.83	4018.54	4105.56	1432.14	1390.81	1469.33	2251.62	1549.2	794.805	1424.62
77.8125	2803.13	2745.45	2347.82	3251.32	2819.59	1276.07	1933.36	1607.41	1351.03	1648.47	2761.61			77.8125	5516.18	2416.43	1367.33	981.884	1344.15	1471.01	1215.53	3966.42	4255.95	1435.65	1421.06	1469.96	2329.5	1587.43	747.239	1451.13
78.75	2889.6	2734.05	2436.99	3247.82	2833.6	1317.43	1950.49	1663.11	1264.99	1663.02	2663.95			78.75	5522.77	2326.57	1304.08	1015.38	1481.69	1565.93	1169.67	3939.15	4288.31	1514.86	1387.51	1476.74	2286.91	1548.18	746.53	1416
79.6875	2852.67	2821.56	2519.37	3305.92	2884.46	1256.26	1961.53	1607.28	1308.76	1630.78	2766.49			79.6875	5486.75	2337.97	1325.25	1022.8	1447.91	1506.23	1191.11	4114.11	4252.36	1489.6	1351.16	1466	2336.18	1534.55	784.4	1359.93
80.625	2926	2831.03	2458.05	3291.32	2902.8	1217.63	1919.18	1647.6	1311.31	1584.61	2645.94			80.625	5490.07	2369.28	1346.02	1046.88	1365.3	1460.5	1202.88	3943.42	4175.14	1415.4	1380.5	1500.89	2284.12	1545.56	811.966	1424.1
81.5625	2881.06	2756.79	2513.84	3349.77	2906.84	1292.44	1947.35	1602.03	1257.52	1598.09	2620.92			81.5625	5460.76	2302.88	1333.6	976.351	1369.47	1619.62	1193.37	3996.54	4186.19	1437.54	1385.44	1448.67	2287.75	1496.28	829.741	1353
82.5	2877.02	2830.8	2533.14	3276.49	2881.64	1221.13	1865.62	1602.93	1332.02	1641.71	2587.82			82.5	5459.82	2327.14	1332.31	959.196	1467.13	1525.9	1191.25	4022.42	4191.86	1434.98	1401.23	1475.01	2387.16	1546.9	828.047	1373.63
83.4375	2923.38	2837.63	2555.89	3345.13	2891.24	1214.01	1930.56	1619.43	1326.37	1601.16	2609.78			83.4375	5334.13	2277.67	1268.67	1013.74	1447.75	1521.14	1203.61	3968.02	4280	1443.46	1398.19	1488.14	2274.04	1483.6	810.802	1333.08
84.375	2927.17	2810.53	2539.44	3409.68	2756.92	1282.88	1910.6	1566.76	1289.04	1625.53	2566.35			84.375	5433.46	2256.82	1330.26	983.219	1357.54	1427.6	1160.39	3903.87	4184.5	1408.16	1349.46	1486.22	2305.6	1485.55	798.862	1324.4
85.3125	2810.3	2774.07	2446.88	3242.72	2765.42	1263.44	1907.53	1637.96	1229.43	1594.71	2544.19			85.3125	5249.31	2351.44	1316.2	983.159	1442	1512.34	1209.39	3892.99	4140.94	1417.54	1327.75	1461.21	2188.35	1472.48	792.709	1385.87
86.25	2875.83	2821.89	2454.02	3408.29	2820.46	1282.52	1920.05	1584.23	1324.9	1601.18	2578.85			86.25	5291.81	2319.76	1315.93	955.989	1439.91	1517.62	1203.52	3985.57	4185.15	1423.34	1360.45	1484.45	2275.8	1557.22	819.702	1400.27
87.1875	2945.26	2812.31	2576.67	3417.86	2741.44	1293.35	1843.68	1586	1247.55	1562.6	2577.95			87.1875	5224.41	2289.98	1345.5	1009.22	1476.07	1410.12	1207.08	3906.81	4232.87	1418.74	1410.13	1553.38	2322.51	1515.1	846.169	1381.87
88.125	2908.68	2734.4	2462.96	3442.04	2696.19	1224.42	1892.05	1653.58	1260.98	1576.14	2494.56			88.125	5258.55	2316.04	1293.47	1015.54	1360.16	1407.79	1175.11	3991.61	4102.38	1393.17	1434.41	1525.7	2213.26	1525.24	808.324	1405.98
89.0625	2824.02	2802.09	2397.08	3255.27	2815.89	1153.93	1961.53	1578.08	1204.02	1590.7	2643.28			89.0625	5165.24	2254.16	1301.74	955.984	1352.48	1426.48	1178.04	3940.34	4292.55	1434.34	1311.4	1500.83	2286.27	1485.44	808.419	1442.88
90	2815.48	2738.16	2355.48	3244.3	2746.15	1161.76	1918.53	1576.93	1189.79	1599.7	2579.24			90	5153.62	2269.16	1342.13	1016.69	1326.17	1418.55	1176.57	3915.93	4238.34	1412.58	1338.44	1506.03	2191.95	1453.09	718.248	1397.14
90.9375	2713.07	2855.55	2382.25	3256.99	2834.26	1223.29	1938.17	1535.08	1181.96	1574.07	2552.11			90.9375	5171.43	2213.49	1346.54	936.838	1424.59	1417.15	1134.71	3880.39	4107.86	1410.95	1316.4	1514.15	2171.5	1491.71	776.257	1386.93
91.875	2870.75	2822.34	2330.38	3281.06	2847.29	1227.8	1929.88	1558.14	1257.03	1638.54	2586.01			91.875	5134.47	2189.94	1244.43	947.77	1388.95	1460	1222.53	3990.16	4271.07	1391.21	1288.2	1442.35	2085.23	1607.77	756.403	1374.41
92.8125	2797.16	2807.08	2339.42	3130.54	2781.84	1187.13	1868.54	1504.77	1244.85	1599.89	2525.74			92.8125	5008.7	2162.5	1281.56	996.124	1327.88	1412.93	1190.9	3897.27	4179.13	1397.23	1385.04	1532.77	2007.39	1554.42	835.858	1387.16
93.75	2793.26	2809.2	2332.64	3173.55	2718.86	1224.77	1927.92	1534.79	1171.85	1567.99	2511.28			93.75	4960.41	2153.45	1260.69	946.482	1338.29	1390.7	1134.45	3834.69	4103.53	1419.71	1328.91	1511.5	2047.44	1565.13	788.052	1369.98
94.6875	2827.78	2799.14	2358.04	3178.35	2732.41	1216.38	1804.35	1544.23	1194.8	1521.75	2500.08			94.6875	5029.2	2190	1290.16	1018.25	1386.3	1312.04	1128.29	3901.93	4054.28	1384.44	1415.28	1469.39	2109.45	1589.76	827.406	1430.34
95.625	2883.32	2816	2388.61	3179.91	2685.43	1169.29	1756.22	1540.14	1171.48	1558.84	2522.2			95.625	4834.95	2099.8	1274.94	940.637	1330.62	1389.12	1118.73	3928.71	3998.95	1393.14	1262.24	1449.18	2035.24	1634.36	784.83	1402.74
96.5625	2835.4	2858.67	2357.18	3115.99	2612.08	1149.01	1839.7	1492.73	1196.98	1496.04	2529.81			96.5625	4950.84	2161.62	1299.67	967.495	1379.72	1363.87	1133.28	3883.75	4215.89	1424.38	1353.79	1496.39	2099.1	1626.95	837.111	1386.83
97.5	2765.91	2812.78	2339.34	3202.22	2618.94	1193.17	1893.63	1545.1	1193.28	1602.38	2530.28			97.5	4938.98	2192.32	1240.1	955.825	1378.36	1373.62	1152.26	3873.77	4134.36	1419.3	1383.38	1555.34	2053.38	1649.89	799.42	1373.27
98.4375	2784.85	2799.51	2325.29	3132.83	2639.86	1105.91	1872.63	1504.28	1248.2	1557.53	2513.83			98.4375	4821.03	2245.03	1304.48	939.679	1341.18	1344.11	1117.86	3820.18	4243.24	1418.28	1382.59	1554.21	2075.2	1621.55	779.89	1398.15
99.375	2810.51	2816.48	2302.11	3099.11	2615.99	1133.64	1818.06	1555.98	1167.48	1628.98	2607.84			99.375	4854.96	2275.1	1262.33	911.386	1255.36	1356.13	1127.8	3772.26	4385.36	1413.65	1300.79	1476.2	2070.95	1612.51	755.466	1325.73
100.312	2787.42	2842.82	2256.96	3025.63	2661.53	1112.59	1785.22	1564.19	1171.44	1584.52	2508.15			100.312	4764.6	2136.59	1264.3	1005.83	1378.66	1270.54	1083.33	3773.67	4503.71	1414.28	1328.27	1436.62	1957.34	1563.37	731.323	1321.2
101.25	2876.58	2880.76	2262.38	3172.1	2614.35	1055.26	1822.35	1561.61	1168.26	1624.06	2438.95			101.25	4741.83	2202.58	1329.54	965.391	1332.21	1291.16	1103.78	3830.56	4233.85	1443.57	1293.27	1528.48	2015.83	1628.1	782.862	1305.6
102.188	2859.42	2899.89	2296.93	3104.06	2575.61	1141.39	1798.93	1499.01	1197.3	1547.49	2460.76			102.188	4757.2	2189.71	1182.23	932.183	1380.57	1307.96	1104.7	3814.49	4284.65	1417.39	1367.55	1589.72	2108.97	1597.77	794.557	1356.4
103.125	2811.34	2857.93	2260.72	3089.97	2483.81	1096.29	1761.18	1544.2	1192.98	1590.55	2465.72			103.125	4709.17	2172.03	1242.09	1009.25	1275.51	1287.83	1106.53	3802.49	4320.19	1429.79	1294.12	1517.47	2079.51	1585.41	821.747	1305.65
104.062	2782.4	2826.11	2290.84	3152.66	2552.06	1085.37	1893.61	1578.62	1218.99	1625.25	2469.08			104.062	4613.32	2198.07	1294.72	1002.74	1351.96	1263.48	1082.03	3858.78	4210.17	1364.99	1339.29	1543.32	2084.11	1649.4	861.807	1319.98
105	2878.61	2858.38	2284.49	3110.72	2491.79	1101.49	1787.95	1567.65	1285.28	1630.12	2488.03			105	4622.83	2205.32	1262.07	957.565	1359.2	1294.84	1094.25	3848.78	4221.13	1370.01	1330.66	1520.79	2077.29	1600.06	812.825	1333.72
105.938	2853.46	2831.38	2166.96	2966.79	2583.52	1127.22	1756.97	1522.51	1218.36	1640.36	2525.09			105.938	4618.06	2107.97	1301.46	904.241	1353.49	1243.88	1102.89	3704.3	4252.39	1384.58	1295.32	1533.9	2136.82	1619.65	769.992	1368.26
106.875	2848.7	2843.71	2177.78	3037.18	2511.04	1051.68	1842.74	1576	1229.18	1683.47	2428.62			106.875	4627.51	2149.3	1282.11	945.823	1309.87	1279.92	1073.06	3823.96	4254.22	1404.26	1309.1	1496.13	2052.4	1603.24	786.078	1319.41
107.812	2810.94	2861.6	2190.57	3047.78	2524.88	1171.33	1808.46	1567.03	1252.43	1697.24	2471.03			107.812	4588.54	2114.99	1261.04	940.377	1237.3	1257.65	1142.39	3800.21	4305.77	1415.71	1320.65	1560.3	2122.64	1589.79	789.148	1321.85
108.75	2879.76	2828.33	2086.22	3021.59	2445.08	1113.29	1818.02	1578.45	1238.27	1718.86	2443.09			108.75	4526.76	2073.77	1257.71	930.4	1368.8	1251.58	1095.75	3866.28	4173.93	1426.28	1365.89	1613.06	2113.73	1583.65	719.852	1411.31
109.688	2798.24	2758.58	2117.86	3061.21	2414.83	1170.73	1761.54	1547.47	1282.37	1655.67	2375.06			109.688	4522.76	2135.27	1288.07	893.429	1348.8	1229.6	1077.57	3843.51	4225.27	1384.21	1393.51	1545.33	2030.97	1595.67	841.839	1380.26
110.625	2864.35	2853.47	2149.75	3106.21	2415.99	1072.88	1791.09	1529.74	1228.25	1644.44	2355.3			110.625	4420.49	2076.41	1237.23	928.251	1371.16	1240.51	1106.33	3804.81	4199.93	1448.18	1369.68	1569.22	2096.39	1598.21	800.792	1406.77
111.562	2785.86	2779.44	2180.7	3072.29	2409.57	1077.37	1795.98	1520.87	1252.72	1687.16	2385.37			111.562	4472.5	2131.74	1245.76	975.17	1279.58	1304.59	1077.55	3817.24	4221.92	1378.95	1405.57	1472.64	2037.93	1575.77	845.163	1349.96
112.5	2789.19	2791.7	2189.32	2981.52	2407.68	986.536	1751.72	1550.02	1185.26	1614.02	2399.74			112.5	4593.76	2129.7	1182.65	896.065	1236.88	1202.73	1097.37	3780.48	4190.25	1423.64	1358.84	1554.61	2094.97	1576.79	847.38	1392.44
113.438	2782.95	2790.34	2210.38	3135.9	2343.38	1044.37	1652.66	1585.61	1151.63	1605.08	2357.03			113.438	4529.34	2061.85	1188.3	919.715	1290.78	1261.96	1097.84	3809.68	4075.77	1417.2	1399.44	1530.69	2159.62	1575.94	824.595	1410.38
114.375	2854.82	2772.15	2195.93	2958.78	2383.22	1052.53	1767.4	1562.39	1163.35	1671.92	2324.3			114.375	4533.21	2091.36	1225.54	879.866	1263.2	1178.7	1095.02	3821.79	4195.87	1378.21	1342.52	1518.5	2084.78	1621.32	817.693	1367.64
115.312	2786.44	2733.48	2184.4	2974.75	2344.74	1045.08	1833.59	1525.09	1144.77	1692.96	2365.81			115.312	4537.47	2013.88	1234.18	877.642	1248.53	1232.7	1091.51	3876.61	4098.46	1354.62	1353.77	1557.95	2088.34	1607.14	737.76	1357.11
116.25	2803.94	2853.82	2216.22	3076.36	2319.62	1046.31	1701.7	1533.01	1197.45	1709.62	2372.63			116.25	4476.23	2014.32	1212.24	908.062	1225.5	1263.59	1072.55	3873.59	4012.25	1381.25	1321.14	1559.96	2041.93	1603.1	799.499	1369.52
117.188	2858.8	2739.22	2240.65	3040.24	2347.59	1052.4	1745.3	1524.34	1207.25	1716.16	2448.52			117.188	4330.15	2001.76	1251.35	912.62	1235.32	1193.31	1086.74	3748.3	4040.76	1364.48	1315.66	1602.82	2098.82	1589.88	833.531	1230.67
118.125	2746.8	2674.53	2286.63	2978	2306.72	1102.12	1658.15	1497.49	1154.53	1639.05	2324.43			118.125	4411.05	1991.1	1242.04	890.976	1283.63	1236.48	1073	3870.07	4210.74	1430.24	1294.58	1540.66	2011.71	1584.55	801.979	1390.94
119.062	2805.77	2682.97	2175.21	2904.36	2262.23	1005.64	1647.83	1513.88	1271.93	1643.9	2332.94			119.062	4412.03	1917.3	1136.26	891.101	1183.65	1243.01	1025.34	3780.29	4191.53	1367.7	1291.52	1533.11	1991.86	1596.28	803.671	1284.14
120	2815.88	2675.98	2149.92	2995.88	2306.58	1016.75	1677.19	1466.5	1166.09	1569.73	2307.86			120	4331.22	2029.12	1177.24	864.081	1218.79	1149.14	1039.19	3825.26	4310.23	1374.92	1297.74	1537.73	2075.38	1619.88	791.259	1296.94
120.938	2744.06	2566.83	2148.7	2898.5	2283.94	1058.87	1705.6	1537.18	1189.97	1595.89	2254.18			120.938	4385.05	1949.54	1172.48	905.777	1220.24	1157.87	1036.55	3838.57	4177.32	1344.93	1342.05	1563.3	2043.16	1547.28	833.53	1264.24
121.875	2735.53	2645.53	2080.71	2836.57	2174.32	1052.31	1715.74	1430.84	1163.39	1595.25	2238.28			121.875	4341.62	1886.33	1193.28	872.976	1357.43	1200.7	1035.12	3782.15	4059.45	1369.78	1334.49	1523.08	2006.5	1558.96	850.183	1408.51
122.812	2697.64	2637.2	2093.57	2870.34	2188.42	1056.48	1664.87	1448.53	1126.48	1651.46	2264.92			122.812	4285.4	1816.4	1183.18	923.982	1360.68	1157.47	1046.66	3684.78	4357.69	1375.4	1306.23	1540.2	1955.91	1585.48	753.638	1255.08
123.75	2675.86	2708.4	2081.71	2857.16	2215.08	1010.7	1568.99	1391.83	1216.97	1602.18	2286.53			123.75	4391.09	1949.91	1242.56	903.247	1247.93	1187.18	1084.19	3797.55	4161.05	1368.66	1333.22	1553.34	2018.26	1550.98	785.358	1375.73
124.688	2861.05	2639.67	2121.77	2873.22	2285.99	990.669	1618.24	1533.02	1126.68	1529.45	2287.19			124.688	4295.3	1873.06	1183.71	900.989	1305.67	1186.07	1033.24	3680.07	4455.75	1331.35	1260.8	1494.35	2019.23	1518.64	782.46	1335.55
125.625	2704.93	2619.85	2088.37	2837.16	2209.56	1043.57	1578.95	1480.26	1131.72	1531.39	2219.68			125.625	4333.07	1855.56	1155.46	871.821	1258.76	1197.21	1035.64	3693.78	4246.68	1383.61	1333.63	1557.39	2027.51	1593.93	833.723	1381.73
126.562	2852.61	2609.14	1991.59	2845.17	2228.57	929.181	1616.8	1492.8	1132.81	1548.27	2268.33			126.562	4248.23	1876.11	1254	864.948	1395.97	1123.08	1035.17	3663.14	4299.05	1339.55	1267.56	1564.45	2016.52	1564.04	806.72	1318.78
127.5	2771.62	2614.68	1932.68	2865.11	2175.12	999.428	1621.1	1536.29	1118.03	1567.66	2253.41			127.5	4333.69	1864.38	1288.74	887.165	1337.29	1086.43	1013.65	3739.48	4253.56	1371.21	1174.09	1518.63	2016.89	1646.06	818.738	1332.72
128.438	2734.27	2600.3	1946.9	2813.92	2106.32	957.3	1536.86	1418.41	1154.89	1550.2	2183.26			128.438	4149.55	1836.22	1172.51	919.425	1370.38	1204.54	1071.64	3765.22	4128.32	1350.94	1301.58	1566.94	1966.61	1607.73	775.647	1261.57
129.375	2805.29	2592.91	1913.4	2879.61	2097.57	956.844	1537.54	1456.21	1176.83	1569.84	2284.53			129.375	4231.68	1939.92	1235.53	901.888	1303.13	1114.82	1054.2	3702.17	4219.46	1373.11	1273.68	1530.06	1971.34	1603.01	790.808	1318.12
130.312	2708.28	2584.76	1883.16	2796.89	2060.68	973.578	1528.3	1420.63	1179.73	1558.87	2164.43			130.312	4336.24	1860.31	1131.47	841.009	1342.53	1101.84	1044.86	3683.07	4320.65	1326.14	1265.75	1503.52	1956.88	1478.96	751.792	1279.5
131.25	2705.62	2555.95	1814.61	2751.03	2090.79	970.881	1567.01	1505.97	1138.16	1555.9	2180.41			131.25	4271.6	1768.28	1156.94	861.279	1273.27	1172.86	1063.38	3648.18	4256.56	1332.59	1274.09	1486.25	1997.24	1495.61	813.819	1288.19
132.188	2799.8	2599.26	1836.2	2843.53	2132.37	911.809	1585.29	1449.61	1191.32	1522.85	2180.35			132.188	4144.7	1857.97	1180.05	851.728	1335.51	1189.52	1061.15	3656.51	4058.78	1346.22	1267	1542.16	2021.16	1573.69	797.419	1267.52
133.125	2696.3	2540.55	1810.72	2721.22	2073.37	953.081	1606.97	1418.27	1176.64	1556.29	2040.54			133.125	4187.95	1892.58	1202.94	867.171	1352.15	1209.6	1053.45	3615.76	4218.15	1326.32	1264.39	1481.11	2017.33	1562.37	719.035	1317.21
134.062	2785.17	2542.61	1834.24	2706.95	2066.65	935.497	1546.57	1463.55	1216.44	1589.1	2137.19			134.062	4151.06	1766.26	1124.22	866.029	1311.09	1172.39	1044.75	3651.73	4250.85	1296.88	1316.71	1496.76	2012.12	1508.62	758.865	1239.62
135	2807.7	2518.95	1810.46	2700.09	2077.8	915.414	1513.21	1434.14	1119.3	1664.57	2068.41			135	4238.89	1838.84	1152.11	863.997	1277.17	1141.41	1023.78	3715.27	4231.7	1283.98	1302.14	1513.81	1955.22	1563.55	796.432	1357.87
135.938	2759.36	2422.02	1833.49	2723.07	2137.51	937.931	1541.12	1396.34	1187.12	1612.09	2092.36			135.938	4299.73	1824.25	1144.62	864.689	1234.96	1224.92	1071.45	3648.64	4326.96	1313.83	1297.36	1505.23	2010.02	1533.96	782.113	1319.58
136.875	2776.11	2537.38	1810.11	2739.15	1989.4	905.196	1481.84	1431.44	1145.37	1642.76	2125.59			136.875	4225.93	1899.81	1176.52	881.149	1292.14	1159.09	1053.56	3606.76	4213.58	1274.21	1278.98	1507.99	1970.18	1522.96	775.104	1257.06
137.812	2710.79	2467.22	1770.45	2680.66	2021.77	896.273	1452.85	1416.16	1162.54	1587.45	2140.47			137.812	4390.92	1832.85	1185.32	865.786	1249.36	1162.31	989.21	3670.72	4201.85	1303.38	1275.53	1467.39	1898.53	1476.08	785.817	1255.15
138.75	2782.47	2425.78	1756.21	2617.02	2025.05	817.564	1303.17	1339.49	1079.68	1605.04	2125.38			138.75	4370.19	1826.15	1085.33	883.32	1180.96	1061.02	1065.7	3715.11	4131.25	1301.24	1275.28	1518.69	1891.16	1540.36	771.98	1245.49
139.688	2592.08	2358	1801.48	2643.56	2016.79	893.405	1479.26	1418.49	1068.69	1581.89	2119.45			139.688	4320.17	1889.56	1131.8	869.806	1202.55	1166.42	1034	3673.25	4211.43	1302.16	1275.4	1501.7	1966.79	1573.29	785.05	1298
140.625	2742.81	2406.53	1715.96	2624.43	2018.69	857.779	1407.32	1416.86	1065.75	1568.3	2160.5			140.625	4333.35	1925.69	1212.12	842.45	1246.89	1056.95	994.22	3588.54	4135.84	1280.83	1299.3	1520.73	1958.31	1590.08	756.577	1268.69
141.562	2625.06	2368.11	1639.42	2595.32	2042.77	895.561	1391.92	1425.16	994.112	1558.68	2088.51			141.562	4891.45	1946.92	1076.72	846.105	1191.02	1096.26	1031.13	3597.11	4305.87	1268.32	1293.7	1534.37	1918.09	1495.84	808.947	1245.95
142.5	2722.64	2376.65	1653.42	2682.14	2015.97	868.819	1431.69	1425.76	1083.2	1651.29	2083.49			142.5	5417.4	2005.65	1164.4	830.581	1277.97	1268.53	1048.32	3567.67	4143.21	1303.5	1216.34	1567.54	1937.33	1520	719.206	1252.16
143.438	2680.17	2403.98	1591.17	2726.7	1931.1	819.97	1297.77	1363.39	1077.82	1553.46	2049.24			143.438	5566.66	2115.18	1199.91	832.489	1305.14	1180.59	1020.86	3535.78	4379.06	1316.79	1286.36	1460.64	1971.61	1540.96	797.157	1266.24
144.375	2677.34	2371.21	1663.25	2697.49	1971.41	800.139	1250.04	1354.48	1131.46	1522.56	1985.4			144.375	5771.82	2088.28	1128.1	805.823	1216.14	1178.52	1059.17	3650.6	4066.46	1307.43	1273.4	1565.46	1925.18	1506.49	724.851	1343.28
145.312	2674.56	2301.19	1606.32	2679.45	1905.24	811.466	1257.41	1396.12	1104.85	1495.27	1968.86			145.312	6004.88	2045.24	1154.93	838.236	1212.31	1139.51	1043.5	3524.35	4241.35	1332.95	1286.18	1522.18	1959.78	1469.82	797.691	1282.5
146.25	2800.49	2278.01	1641.64	2816.8	1937.25	901.273	1415.99	1415.77	1058.06	1494.98	1908.36			146.25	6040.07	1931.79	1107.99	835.267	1235.74	1151.28	1024.84	3583.26	4332.51	1276.1	1239.98	1498.17	1917.75	1551.73	800.782	1318.72
147.188	2767.97	2342.03	1596.12	2789.95	1912.55	1005.39	1541.03	1454.22	1114.1	1383.07	1925.54			147.188	6012.12	2054.36	1172.57	790.8	1182.9	1138.86	1055.06	3664.16	4280.88	1311.82	1287.48	1537.09	2108.54	1562.7	789.032	1391.84
148.125	2694.99	2240.88	1531.18	2796.23	1821.23	953.185	1514.03	1418.13	1082.95	1333.91	1919.63			148.125	6015.42	1938.29	1175.27	869.399	1323.4	1170.38	1030.19	3719.29	4430.92	1303.32	1292.87	1515.88	2076.71	1520.77	796.985	1245.34
149.062	2690.78	2207.26	1545.24	2776.23	1836.65	995.923	1490.21	1363.48	1122.34	1329.92	1859.73			149.062	6157.4	1907.41	1134.22	818.579	1286.63	1223.07	1079.96	3824.65	4346.86	1335.86	1319.22	1520.85	2108.2	1529.92	768.664	1289
150	2757.84	2221.73	1581.92	2624.82	1884.69	1011.66	1585.32	1439.39	1169.2	1334.39	1793.78			150	5987.85	1844.47	1133.14	802.833	1269.76	1214.35	1035.86	3811.63	4340.76	1353.21	1258.23	1504.99	2213.73	1514.35	814.16	1306.02
150.938	2741.41	2199.22	1545.8	2587.49	1916.77	995.372	1560.31	1445.33	1143.7	1285.92	1803.34			150.938	6060.99	1958.12	1139.67	827.973	1248.08	1206.29	1080.77	3684.96	4309.42	1310.46	1293	1482.66	2057.7	1515.7	781.817	1297.36
151.875	2805.61	2162.24	1421.65	2515.16	1821.96	906.15	1516.54	1318.19	1098.93	1186.48	1746.59			151.875	5980.3	1801.63	1090.73	766.806	1239.59	1225.24	1059.1	3718.16	4193.83	1359.97	1271.01	1498.46	2179.51	1489.65	814.543	1318.82
152.812	2760.3	2200.8	1399.27	2549.33	1770.86	973.554	1498.99	1387.72	1067.69	1218.42	1769.02			152.812	5823.92	1851.96	1098.31	846.006	1158.45	1223.96	1049.81	3692	4419.48	1336.7	1292.92	1456.85	2140.65	1452.17	796.125	1284.41
153.75	2689.9	2179.29	1364.91	2526.76	1861.64	981.087	1534.09	1325.49	1054.23	1222.93	1788.32			153.75	5431.96	1777.86	1142.4	853.301	1152.92	1126.09	1091.05	3680	4305.87	1412.34	1320.35	1489.53	2183.31	1462.66	807.481	1320.39
154.688	2706.14	2134.18	1358.37	2429.09	1752.59	901.937	1530.63	1296.28	1065.19	1225.12	1723.8			154.688	5265.74	1753.01	1095.58	888.11	1240.96	1198.71	1099.69	3724.94	4280.39	1322.71	1221.43	1500.75	2114.19	1564.88	809.367	1308.26
155.625	2669.39	2077.1	1276.48	2407.59	1771.19	931.906	1501.18	1311.07	1070.84	1185.02	1691.99			155.625	5376.49	1907.51	1114.39	848.098	1232.73	1197.85	1049.91	3676.97	4397.81	1300.59	1140.43	1475.73	2072.23	1476.94	778.365	1176.98
156.562	2639.7	2070.16	1296.9	2564.74	1771.06	897.228	1484.58	1279.86	998.146	1161.1	1599.05			156.562	5342.62	1855.43	1122.09	818.465	1162.41	1263.18	1065.25	3650.15	4122.94	1298.71	1237.34	1479.38	2122.65	1519.28	793.743	1320.23
157.5	2596.75	2021.06	1155.17	2448.85	1705.08	855.469	1444.05	1232.23	949.973	1116.09	1494.36			157.5	5324.96	1836.15	1108.4	846.459	1126.16	1221.31	1100.6	3752.14	4289.22	1264.12	1211	1502.05	2018.49	1463.92	695.461	1209.48
158.438	2574.12	1978.35	1173.82	2433.4	1739.99	870.362	1467.62	1118.33	946.109	1104.89	1455.84			158.438	5265	1837.61	1098.3	804.714	1104.47	1165.61	1064.58	3714.48	4311.02	1315.55	1242.62	1455.76	2074.11	1478.24	805.111	1260.4
159.375	2571.53	1965.3	1123.4	2374.56	1692.81	848.247	1399.86	1130.51	961.846	1082.42	1488.53			159.375	5261.7	1826.83	1096.09	842.265	1137.59	1209.18	1067.49	3743.14	4021.48	1306.73	1243.21	1537.7	2089.78	1511.96	802.145	1301.97
160.312	2566.18	1959.58	1149.64	2373.91	1672.94	766.696	1354.63	1068.87	950.253	1088.22	1508.93			160.312	5179.78	1843.76	1017.72	862.169	1155.38	1199.06	1130.97	3652.43	4021.8	1332.72	1263.18	1546.74	2054.9	1560.39	768.855	1303.42
161.25	2592.09	1968	1103.29	2400.53	1620.74	769.879	1401.95	1094.54	909.802	1142.54	1501.91			161.25	5099.55	1855.48	1081.91	803.302	1134.97	1216.71	1087.03	3654.16	4000.82	1299.9	1268.31	1499.21	2049.36	1480.62	795.767	1278.03
162.188	2575.52	1986.73	1102.85	2434.26	1655.52	835.743	1264.65	1018.69	907.809	1128.84	1435.6			162.188	5147.01	1892.33	1052.46	846.534	1135.85	1236.61	1089.63	3574.21	4056.9	1329.45	1196.64	1497.1	2066.88	1432.92	804.976	1283.71
163.125	2578.03	1912.4	1154.02	2440.22	1621.21	812.579	1373.13	1026.62	876.863	1208.28	1489.11			163.125	4215.89	1791.11	1095.43	782.874	1112.46	1253.5	1064.43	3652.12	3983.21	1327.04	1200.5	1505.57	2073.93	1485.98	827.484	1290.78
164.062	2598.15	1905.18	1164.43	2350.41	1595.87	767.826	1382.02	1040.59	884.671	1150.69	1509.39			164.062	3042.45	1718.57	1109.35	810.767	1084.72	1191.99	1070.35	3608.33	3956.31	1293.26	1198.05	1528.37	2021.86	1531.97	849.206	1246.71
165	2511.12	1847.3	1121.49	2224.44	1487.87	745.073	1324.52	1060.27	873.791	1097.46	1440.12			165	3868.84	1728.63	1052.78	801.958	1028.39	1214.19	1043.45	3616.22	4213.57	1315.08	1192.75	1475.84	2010.86	1536.88	738.767	1197.6
165.938	2479.16	1827.05	1060.26	2175.22	1490.09	781.564	1396.83	1051.17	855.466	1093.17	1436.47			165.938	5301.31	1878.68	1064.59	746.64	1006.55	1181.58	1063.97	3640.81	4077.18	1316.19	1254.01	1444.43	2043.32	1543.62	815.292	1251.72
166.875	2547.34	1821.16	1048.1	2147.17	1445.06	686.079	1301.67	1010.42	861.389	1081.6	1390.93			166.875	5915.81	1886.28	1139.62	805.419	1111.29	1190.08	1014.11	3439.38	4247.88	1278.84	1228.65	1501.12	1906.69	1474.46	786.079	1224.94
167.812	2542.62	1841.27	1013.74	2087.41	1433.7	659.522	1222.28	920.587	807.472	1082.99	1328.27			167.812	6036.33	1986.07	1032.06	761.6	1008.99	1199.94	1079.42	3614.78	4148.66	1323.41	1233.58	1461.79	2006.88	1502.49	773.148	1273.42
168.75	2505.13	1840.81	1025.53	2044.02	1387.55	649.874	1230.99	823.153	803.402	1055.26	1330.89			168.75	5939.82	1967.68	1051.47	751.374	1009.89	1259.69	1081.95	3615.32	4243.6	1269.72	1217.77	1479.82	1999.37	1411.88	712.041	1194.3
169.688	2530.05	1844.71	960.723	2000.34	1258.25	650.877	1153.17	831.781	792.918	1060.29	1248.62			169.688	5960.26	2066.87	1073.59	747.375	1058.69	1132.11	1078.45	3485.12	4069.07	1254.81	1232.68	1499.32	1954.04	1497.96	752.07	1226.52
170.625	2545.49	1792.46	1067.08	1863.67	1214.36	648.688	1259.76	811.536	762.018	1054.72	1269.32			170.625	6017.41	2079.92	1142.16	795.44	1080.76	1225.93	1080.22	3574.04	4054.74	1255	1222.48	1474.45	2008.63	1537.98	757.062	1218.05
171.562	2487.67	1706.15	984.916	1814	1178.61	642.685	1185.32	784.411	718.902	1064.91	1197.14			171.562	5953.62	2059.81	1048.79	829.505	1083.02	1220.74	1074.79	3578.34	4180.77	1235.22	1195.55	1406.6	1902.76	1455.19	733.842	1142.97
172.5	2506.53	1669.07	975.49	1718.3	1115.22	634.905	1209.72	751.428	775.709	1010.36	1245.6			172.5	5777.49	2099.41	1060.4	782.908	989.932	1297.66	1052.86	3473.58	4034.25	1228.98	1259.4	1331.96	1927.66	1439.69	728.18	1240.23
173.438	2481.41	1683.95	962.131	1746.6	1118.88	574.014	1158.2	725.189	755.12	1025.36	1209.54			173.438	5899.84	2008	1098.3	766.867	1095.97	1159.85	1065.05	3573.89	4073.72	1250.82	1246.5	1437.47	1930.93	1518.34	772.924	1188.95
174.375	2408.78	1605.3	952.556	1709.15	1074.8	620.53	1140.3	707.728	761.71	1044.66	1263.93			174.375	5818.75	2040.26	1087.74	819.551	1046.31	1195.85	1097.17	3422.38	4112.7	1266.62	1152.33	1433.28	1875.43	1447.65	770.253	1225.53
175.312	2349.29	1629.85	933.268	1523.77	1055.7	548.748	1118.15	708.128	764.078	1026.81	1254.92			175.312	5845.65	2120.66	1101.69	756.023	1094.08	1148.4	1058.17	3527.17	4063.02	1246.41	1180.05	1410.21	1881.07	1500.09	817.247	1312.13
176.25	2354.34	1689.56	965.334	1563.11	1039.42	553.627	1191.31	681.064	733.978	1038.43	1253.45			176.25	5794.84	2030.33	1046.26	760.641	991.105	1196.15	1082.1	3485.44	4040.81	1220.87	1167.63	1385.75	1870.27	1447.87	761.51	1221.23
177.188	2448.71	1602.75	924.167	1496.27	991.412	608.225	1128.04	695.503	809.195	1101.19	1242.87			177.188	5880.14	1931.28	1046.71	762.596	1000.84	1167.42	1092.8	3561.29	4079.53	1262.6	1206.53	1452.96	1890.23	1491.28	769.38	1317.12
178.125	2315.06	1573.74	882.483	1465.78	978.464	620.691	1089.85	722.519	809.601	1065.39	1208.98			178.125	5806.81	1976.74	1082.97	789.624	1111.65	1206.98	1099.18	3349.46	4206.9	1226.22	1100.7	1386.15	1823.76	1368.5	720.082	1198.42
179.062	2445.5	1622.79	890.511	1510.74	940.257	540.289	1083.34	685.047	763.109	1048.4	1225.79			179.062	5892.32	1952.74	1063.84	793.744	998.695	1121.35	1081.92	3462.84	4114.85	1192.57	1163.11	1394.83	1810	1408.45	709.259	1141.57
180	2352.56	1574.02	928.967	1397.42	938	579.659	1126.12	659.556	735.683	1059.96	1274.17			180	5707.49	2059.18	1085.41	799.164	1046.63	1170.3	1083.76	3433.68	4158.29	1249.84	1105.2	1391.03	1898.97	1488.66	719.443	1246.59
180.938	2302.98	1551.49	879.043	1325.84	887.649	564.319	1013.29	648.087	788.232	1118.14	1214.01			180.938	5758.19	2025.33	1048.61	780.579	977.097	1136.98	1083.85	3434.24	4177.93	1224.03	1169.8	1448.99	1824.68	1455.99	746.344	1287.26
181.875	2326.15	1558.73	906.341	1384.99	917.176	560.854	1016.3	689.105	770.695	1095.5	1219.63			181.875	5832.59	1950.12	1109.71	808.391	1036.3	1189.48	1075.43	3362.61	4094.63	1167.72	1148.43	1430.57	1792.9	1499.18	730.502	1351.86
182.812	2360.32	1526.22	837.464	1400.33	935.232	548.097	1066.16	715.793	786.889	1060.52	1250.4			182.812	5684.43	1983.85	1018.23	789.969	1005.39	1202.94	1077.02	3510.19	3905.68	1241.69	1209.06	1443.97	1860.44	1609.21	714.606	1301.26
183.75	2394.15	1516.96	874.815	1348.76	890.12	501.197	1114.35	650.41	807.259	1063.79	1213.29			183.75	5805	2035.35	1044.35	732.882	967.675	1179.55	1037.51	3499.7	4057.74	1234.23	1165.84	1413.48	1765.18	1528.85	753.417	1227.2
184.688	2383.18	1561.97	870.414	1334.34	891.633	531.328	1061.14	674.129	815.45	1082.88	1259.08			184.688	5410.88	1991	1055.28	751.198	1048.92	1171.09	1030.55	3446.49	4154.66	1221.29	1223.69	1396.28	1830.34	1540.34	749.403	1215.4
185.625	2369.32	1590.71	890.955	1401.28	891.955	547.279	1022.26	650.226	784.344	1091.92	1205.47			185.625	5159.26	1996.31	1051.07	771.085	920.129	1168.42	1052.92	3510.68	3905.8	1251.28	1188.08	1432	1844.32	1484.36	722.222	1269.63
186.562	2362.7	1539.27	865.225	1342.84	844.451	563.235	1004.34	709.414	751.557	1089.02	1229.56			186.562	4914.67	1918.98	1068.28	824.524	975.828	1146.02	1013.12	3460.84	4168.41	1261.15	1239.28	1442.18	1860.27	1545.52	780.239	1239.45
187.5	2378.32	1521.23	820.1	1352.45	884.762	576.055	1080.82	698.504	812.279	1161.46	1224.73			187.5	4949	1899.06	971.517	785.188	1056.89	1238.62	1092.41	3448.65	4164.41	1221.17	1190.05	1491.79	1850.09	1585.07	762.44	1255.39
188.438	2356.33	1594.5	903.321	1342.12	886.875	532.885	1023.47	657.283	814.64	1138.5	1250.39			188.438	4385.48	1843.71	1061.91	727.304	1021.51	1163.8	1040.91	3398.22	4192.69	1218.93	1226.87	1376.38	1830.34	1463.23	723.965	1202.51
189.375	2373.62	1528.31	856.826	1376.65	834.025	514.898	1035.04	650.887	762.109	1138.16	1250.21			189.375	3980.83	1790.52	1009.54	757.143	1049.98	1205.05	1004.89	3442.06	4052.5	1217.13	1165.88	1450.92	1804.29	1565.91	787.289	1228.7
190.312	2386.4	1562.9	840.234	1383.41	861.504	544.033	995.228	684.553	786.751	1139.95	1208.38			190.312	4501.39	1820.51	1092.99	828.757	1055.22	1106.26	1049.44	3424.8	4078.33	1204.9	1188.65	1440.62	1810.88	1460.69	733.629	1200.71
191.25	2354.03	1499.53	780.363	1350.41	829.426	532.068	1010.4	672.472	777.732	1146	1347.13			191.25	5108.19	1925.59	1074.56	803.142	1008.84	1173.66	1079.03	3440.52	4051.83	1173.88	1218.16	1454.4	1836.05	1515.6	746.378	1268.23
192.188	2376.15	1507.34	830.029	1319.77	803.802	539.461	963.893	655.715	846.782	1133.83	1298.35			192.188	5547.3	1983.56	1113.43	791.78	1073.96	1129.74	1022.64	3355.7	4206.52	1146.88	1127.48	1454.42	1765.65	1511.68	758.939	1208.36
193.125	2352.27	1518.67	815.606	1370.04	844.162	532.467	980.454	703.581	777.359	1184.61	1235.39			193.125	5703.96	2005.06	1006	803.35	970.093	1088.02	1076.44	3338.04	4166.24	1164.42	1182.43	1423.42	1784.44	1483.38	742.895	1162.54
194.062	2395.21	1492.91	855.952	1420.78	831.081	532.315	1004.26	628.833	772.024	1135.47	1234.26			194.062	5579.13	2020.67	1051.11	821.087	986.991	1175	1062.21	3485.94	4201.73	1230.25	1208.7	1442.03	1771.1	1442.37	741.393	1227.1
195	2383.17	1528.42	868.411	1311.84	819.085	519.406	986.118	656.435	780.359	1152.05	1328.13			195	5737.07	1913.38	1105.44	759.596	977.604	1172.87	1060.08	3305.74	4139.26	1142.09	1225.5	1439.41	1733	1461.17	722.32	1134.13
195.938	2421.42	1504.56	851.149	1358.09	790.733	513.996	947.573	658.96	802.625	1162.42	1237.75			195.938	6060.83	1944.61	1130.62	814.424	1075.8	1199.38	1029.6	3268.02	4125.12	1191.12	1178.77	1406.09	1777.18	1503.88	726.836	1230.06
196.875	2356.56	1475.77	829.682	1359.76	880.99	518.482	992.637	606.725	830.655	1171.71	1279.23			196.875	6000.52	1985.43	1070.55	762.555	999.041	1205.26	1054.73	3362.09	4156.48	1226.28	1203.58	1428.11	1754.41	1470.28	720.557	1166.59
197.812	2334.47	1479.89	880.552	1279.62	833.113	523.863	950.092	649.798	791.168	1159.79	1301.72			197.812	6022.58	1940.47	1023.76	753.602	1004.11	1240.94	1047.79	3323.86	4235.2	1150.08	1182.17	1444.76	1732.83	1452.79	717.332	1192.41
198.75	2389.5	1518.68	848.21	1394.43	863.292	530.505	921.067	662.533	839.225	1097.35	1341.44			198.75	6005.83	1951.37	1058.45	775.035	1064.45	1206.06	1085.98	3337.96	4120.89	1168.02	1167.7	1442.93	1678.53	1505.35	726.802	1250.95
199.688	2344.36	1520.33	847.707	1301.98	820.347	538.074	996.917	661.901	825.966	1181.54	1294.09			199.688	5959.18	1892.05	1064.41	807.489	1061.81	1170.66	1092.74	3216.49	4133.89	1202.7	1228.33	1384.69	1744.05	1463.07	738.913	1200.04
200.625	2418.84	1482.15	816.626	1387.7	841.676	527.722	918.571	645.482	815.911	1176.22	1347.06			200.625	5933.63	2063.74	1105.44	774.727	1061.03	1134.94	1055.13	3277.33	4172.36	1146.69	1147.2	1379.58	1709.37	1470.32	720.607	1173.5
201.562	2418.03	1530.08	841.413	1357.72	841.252	524.247	962.85	648.906	842.027	1150.69	1339.15			201.562	5931.57	2007.3	1091.59	788.246	1109.52	1178.37	1057.77	3252.83	4132.45	1209.47	1134.63	1425.13	1719.47	1490.77	698.023	1122.53
202.5	2378.97	1548.98	831.421	1361.88	794.179	515.561	915.441	643.872	842.539	1150.43	1279.1			202.5	5840.73	2028.85	1083.02	782.769	988.432	1199.28	1066.1	3359.66	4017.07	1172.99	1189.38	1453.88	1755.39	1492.74	715.242	1165.28
203.438	2322.45	1519.53	792.98	1355.7	808.406	509.552	924.843	644.185	853.956	1136.26	1332.47			203.438	5934.6	2108.58	1010.84	731.806	998.811	1156.29	1047.16	3350.31	4152.69	1205.23	1212.61	1394.12	1716.08	1524.47	702.233	1209.26
204.375	2347.54	1460.62	839.977	1341.43	808.259	510.362	928.971	645.308	881.697	1184.8	1350.08			204.375	5880.52	2075.53	1030.43	773.222	1027.45	1187.28	1053.27	3328.91	4079.92	1208.87	1247.22	1441.21	1734.98	1511.26	739.932	1166.57
205.312	2420.1	1473.6	837.218	1387.1	814.268	516.018	875.394	649.477	856.066	1189.94	1377.16			205.312	6007.2	2055.09	1067.09	800.411	954.972	1147.74	1094.25	3405.48	3982.74	1191.81	1286.09	1515.68	1783.3	1569.71	737.437	1230.26
206.25	2380.41	1474.25	839.821	1320.99	853.714	532.377	924.866	673.976	879.305	1186.57	1411.15			206.25	5987.69	2065.2	994.784	822.043	1002.88	1155.55	1123.01	3237.49	4178.88	1214.79	1189.09	1467.35	1712.07	1412.85	705.979	1187.13
207.188	2339.74	1444.94	829.615	1373.99	879.842	560.477	880.027	655.322	886.95	1169.11	1353.12			207.188	6027.5	2074.43	991.59	765.314	1003.69	1213.85	1092.84	3301.18	4047.14	1207.38	1216	1439.93	1729.98	1465.18	694.353	1152.19
208.125	2431.16	1444.27	841.885	1318.45	889.049	530.598	949.347	669.469	839.586	1149.14	1354.91			208.125	5877.31	1968.72	1028.1	765.208	1075.05	1242.64	1048.7	3399.08	4108.78	1176.29	1214.25	1461.07	1785.36	1515.26	765.237	1200.67
209.062	2364.04	1464.04	828.933	1398.29	850.718	508.765	922.573	661.166	931.504	1153.91	1432.41			209.062	5874.62	2016.82	1010.13	756.481	1033.48	1193.08	1007.73	3327.45	4135	1232.17	1156.89	1499.5	1758.32	1473.23	729	1187.73
210	2378.8	1456.88	832.033	1406.49	821.107	547.492	878.778	660.007	882.993	1128.65	1387.23			210	5887.35	2012.36	1090.44	800.47	1030.76	1218.05	1059.88	3318.98	4200.53	1248.01	1190.89	1450.37	1751.53	1458.78	791.995	1179.59
210.938	2383.26	1445.62	817.279	1403.55	829.92	532.46	901.814	676.54	917.274	1142.74	1412.14			210.938	5911.98	2046.04	1067.03	783.815	1056.08	1216.19	1038.65	3340.72	4126.94	1199.87	1178.39	1445.9	1644.05	1467.29	690.282	1154.33
211.875	2373.95	1456.88	787.682	1399.07	821.192	535.265	903.17	643.988	909.218	1140.75	1380.1			211.875	5902.4	1993.19	1074.5	825.174	1075.67	1223.65	1067.39	3298.45	4128.28	1237.95	1212.9	1442.87	1691.53	1522.18	732.402	1186.59
212.812	2307.1	1430.15	812.334	1367.88	838.123	550.624	857.508	630.197	857.671	1147.1	1387.29			212.812	5992.94	1942.52	1055.8	796.91	1054.12	1279.6	1085.47	3397.76	4097.67	1245.46	1238.86	1496.32	1748.28	1523.81	732.615	1202.58
213.75	2408.19	1448.79	840.192	1395.77	794.988	528.416	874.964	648.491	928.588	1187.7	1434.26			213.75	5981.7	2010.31	1040.56	829.464	1062.72	1243.24	1047.86	3317.99	4112.31	1219.69	1221.71	1487.47	1778.2	1543.31	749.435	1204.78
214.688	2372.99	1435.66	859.074	1393	838.206	545.681	864.752	653.451	936.151	1159.58	1415.29			214.688	6022.01	1957.13	1074.13	789.813	1068.05	1331.23	1000.92	3244.16	4141.43	1257.15	1242.69	1462.49	1748.13	1500.61	717.227	1253.77
215.625	2497.49	1479.37	828.593	1382.69	840.97	486.047	823.497	620.007	955.501	1118.86	1434.54			215.625	5874.57	1929.06	1063.9	826.177	1070.46	1310.54	1037.02	3251.33	4185.96	1188.41	1164.84	1404.59	1747.86	1445.06	697.667	1221.11
216.562	2368.23	1488.38	854.893	1393.89	822.133	522.074	872.741	630.294	882.91	1189.77	1394.47			216.562	5946.3	2034.62	1066.08	796.121	1067.68	1266.3	1071.83	3358.36	3816.8	1193.59	1164.84	1439.19	1718.65	1483.23	717.23	1162.38
217.5	2463.56	1473.3	834.959	1366.12	792.992	500.944	859.387	627.414	945.934	1194.12	1372.91			217.5	5946.29	2065.9	1050.55	779.786	1039.28	1277.81	1036.58	3274.54	4071.19	1174.11	1204.75	1487.75	1696.67	1511.1	725.31	1202.36
218.438	2394.8	1543.21	801.176	1316.4	802.281	492.328	830.868	627.458	902.766	1208.02	1418.39			218.438	5926.45	2144.9	1051.4	807.569	986.14	1215.9	1038.18	3248.14	4100.1	1186.24	1121.02	1415.43	1729.49	1526.43	707.965	1135.88
219.375	2372.53	1438.9	842.675	1359.74	851.272	534.736	859.515	644.277	948.074	1147.96	1420.86			219.375	5930.65	1944.73	1046.43	795.86	1015.73	1222.74	1041.48	3229.85	4072.54	1242.63	1218.53	1422.25	1676.19	1530.05	726.199	1199.83
220.312	2419.24	1515.17	851.282	1386.09	838.401	500.319	827.678	593.047	1017.3	1138.35	1388.04			220.312	5745.36	2098.63	995.517	781.375	1042.32	1234.33	1009.22	3306	3884.99	1172.01	1153.96	1463.06	1707.85	1473.88	677.175	1160.94
221.25	2383.82	1445.93	858.435	1374.22	828.831	520.834	800.363	618.24	927.001	1183.89	1424.64			221.25	5822.84	1995.15	1014.28	771.773	1046.84	1148.57	1035.25	3237.78	4134.4	1197.51	1194.93	1444.69	1696.32	1454.95	720.059	1153.32
222.188	2459.5	1512.79	794.137	1371.75	846.396	531.093	806.667	658.7	870.36	1117.95	1425.5			222.188	6026.82	2064.93	1082.83	799.45	1062.65	1272.58	1041.82	3219.1	4040.89	1239.23	1185.89	1456	1716.11	1479.2	706.349	1166.91
223.125	2382.18	1476.66	776.958	1394.7	842.615	495.414	854.279	623.464	887.22	1155.2	1466.34			223.125	5910.14	1995.17	1110.38	833.325	1024.69	1191.95	1092.57	3238.79	4042.63	1153.74	1163.76	1463.88	1708.13	1527.4	711.361	1231.1
224.062	2409.16	1475.84	802.986	1378.9	864.624	505.481	757.781	580.883	925.821	1172.97	1444.68			224.062	5938.6	1961.66	1044.92	795.931	995.341	1235.51	1036.28	3203.47	3933.95	1233.81	1105.95	1419.8	1727.68	1469.8	683.285	1143.89
225	2365.82	1511.55	827.382	1427.31	832.448	504.87	811.103	582.216	934.368	1145.52	1377.32			225	5754.12	2009.66	1032.59	785.247	1062.08	1192.01	1079.05	3309.64	3919.52	1201.03	1222.74	1482.22	1675.35	1532.08	691.51	1200.74
225.938	2415.87	1539.65	854.313	1418.93	892.506	540.901	780.251	623.99	946.237	1124.61	1433.67			225.938	5705.66	1992.59	1049.12	754.173	991.292	1330.16	1095.89	3244.53	4140.78	1226.13	1189.54	1429.71	1714.94	1503.34	724.437	1195.52
226.875	2302.67	1432.89	829.086	1403.43	872.691	521.213	819.835	618.57	908.395	1139.5	1440.14
