# Supplementary material for: A non-conducting role of the Cav1.4 Ca2+ channel drives homeostatic plasticity at the cone photoreceptor synapse
Source: eLife. 2024 Nov 12;13:RP94908. doi: 10.7554/eLife.94908 (PMC11556788; doi:10.7554/eLife.94908)
Supplement: Figure 10—source data 1. [file elife-94908-fig10-data1.xlsx]

## Sheet: Fig.10a
Figure 10
Figure 10A
	WT				G369i KI				CaV1.4 KO
Light intensity (log cd•s/m2)	0	2	2.3	2.6	0	2	2.3	2.6	0	2	2.3	2.6
	Potential (µV)				Potential (µV)				Potential (µV)
Time (ms)	-2682.04	-400.452	-1069.78	-3344.78	3705.41	3859.77	-3589.19	1886.15	2746.27	-3221.99	5911.7	3801.12
-50	-3189.93	-48.6845	-253.945	-3728.42	3795.99	3008.19	-2458.48	2651.33	2621.28	-4906.18	4890.59	2747.18
-49.5	-3469.78	173.647	569.179	-3784.53	3877.07	2138.48	-1293.65	3030.14	1401.53	-6909.31	3603.34	1634.8
-49	-3608.48	296.518	1051.37	-3851.67	3846.01	1366.75	-532.801	3224.63	137.997	-8584.59	2148.04	755.323
-48.5	-3618.08	400.031	1018.49	-3938.35	3676.56	923.875	-121.062	2931.67	-570.421	-8855.37	815.385	532.152
-48	-3264.65	572.186	590.896	-3362.77	3418.89	1002.45	-61.1536	1984.29	-763.533	-7131.53	-411.844	898.283
-47.5	-2468.98	926.181	7.42188	-1955.91	2966.05	1399.46	-552.565	856.884	-882.113	-4065.16	-1536.22	1314.89
-47	-1520.42	1663.68	-455.444	-641.19	2432.53	1919.18	-1336.29	-165.093	-1008.49	-782.542	-2162.07	1578.28
-46.5	-779.655	2676.02	-743.374	-58.9327	2073.79	2424.4	-2204.66	-1027.88	-1036.86	1765.84	-2084.16	1827.76
-46	-419.941	3752.51	-833.442	382.936	1962.42	2734.27	-3130.3	-1803.08	-895.903	3275.93	-1585	2158.57
-45.5	-389.006	4916.03	-719.742	895.774	1962.18	2818.53	-3813.24	-2526.99	-439.09	4034.26	-793.452	2475.69
-45	-533.335	5900.8	-594.054	747.294	1933.03	2752.11	-4245.78	-2930.16	161.382	4386.89	385.598	2682.66
-44.5	-942.867	6481.82	-375.99	-134.44	1942.21	2678.63	-4760.14	-2983.29	666.083	4549.1	1838.05	2825.87
-44	-1724.64	6809.82	205.358	-1291.08	1983.42	2796.92	-5475.82	-2820.25	954.736	4708.95	3222.9	2720.32
-43.5	-2601.1	6766.7	993.185	-2379.28	1697.99	3081.52	-6418.51	-2442.93	1094.17	4720.83	4097.47	2268.22
-43	-3134.69	6202.47	1628.9	-3363.78	910.011	3252.79	-7235.33	-2023.07	1159.79	4229.16	4399.74	1687.07
-42.5	-3117.33	5277.19	2033.95	-4286.41	42.6753	3392.21	-6974.1	-1577.52	953.175	3256.74	4526.66	1167.29
-42	-2695.06	4169.31	2259.47	-4938.75	-432.436	3653.14	-5386.12	-981.602	693.382	1996.28	4656.23	784.197
-41.5	-2110.7	3031.06	2322.84	-5296.87	-383.778	3765.68	-3304.53	-387.704	721.852	500.99	4413.32	309.659
-41	-1376.87	2020.4	2267.43	-5495.68	-10.5754	3334.45	-1491.89	139.721	793.269	-1054.84	3571.8	-427.75
-40.5	-414.059	1277.72	2036.11	-5442.52	285.229	2470.04	23.9741	569.972	628.812	-2592.4	2346.65	-1169.42
-40	517.839	882.217	1580.89	-5031.84	371.016	1775.78	1681.65	696.322	391.889	-3980.04	902.286	-1576.28
-39.5	1228.89	805.112	1052.72	-4433.04	384.886	1408.88	3300.19	387.838	266	-4837.52	-521.684	-1447.17
-39	2071.92	902.766	644.494	-3735.31	398.521	1324.79	4304.71	-296.836	203.969	-5314.05	-1825.53	-838.472
-38.5	3167.23	1161.76	526.991	-2877.7	444.665	1637.01	4866.04	-1181.23	337.617	-5661	-3129.28	81.207
-38	4175.24	1679.68	578.714	-1953.8	434.747	2208.33	5378.63	-2308.54	521.527	-5890.43	-4202.18	1352.46
-37.5	4813.51	2273.35	517.527	-1128.82	274.566	2778.27	5748.43	-3602.33	521.196	-5902.79	-4617.16	2983.49
-37	5006.91	2672.95	290.612	-360.84	224.262	3150.03	5734.87	-4648.12	645.996	-5355.39	-4442.22	4527.16
-36.5	4962.49	2881.21	-13.165	285.358	546.237	3313.79	5373.51	-5318.56	1060.48	-4431	-3419.02	5436.8
-36	4773.3	2900.3	-199.159	544.974	1202.12	3326.73	4770.47	-5716.43	1644.86	-3686.64	-949.421	5719.11
-35.5	4352.19	2561.66	-179.82	672.884	2041.23	3096.07	3988.36	-5991.82	2034.05	-2762.86	2209.22	5634.4
-35	3883.27	1779.79	-96.1008	903.216	2900.65	2614.2	3178.76	-6229.61	1962.15	-1000.72	4822.97	5055.35
-34.5	3548.44	746.133	74.3423	840.703	3594.21	1889.79	2372.44	-6149.24	1818.94	1041.76	6316.38	3926.82
-34	3299.05	-428.262	589.705	385.674	3894.55	944.783	1764.04	-5607.64	1973.07	2370.7	6478.84	2624.67
-33.5	3107.57	-1704.93	1258.81	-247.683	3639.32	102.932	1554.93	-4855.43	2224.37	2496.67	5559.54	1231.63
-33	3129.16	-2686.92	1586.54	-912.418	2720.87	-433.881	1541.09	-4125.11	2379.12	1420.89	4111.38	-354.789
-32.5	3411.83	-3205.24	1653.87	-1224.64	1416.8	-990.495	1665.6	-3480.57	2446.64	-347.136	2789.59	-1848.34
-32	3449.27	-3490.1	1919.12	-741.262	391.569	-1748.16	1862.14	-2845.73	2292.28	-2152.94	2018.28	-3100.75
-31.5	3012.87	-3612.7	2419.96	394.606	-60.0725	-2425.74	1910.41	-2198.3	1969.1	-3430.97	1722.77	-4242.23
-31	2516.35	-3418.69	2735.93	1635.93	-52.2795	-2792.63	1915.3	-1635.55	1754.48	-3994.84	1818.44	-5101.18
-30.5	2034.6	-2738	2697.15	2919.1	377.513	-2711.75	1800.9	-1388.87	1772.72	-3923.18	2032.76	-5409.47
-30	1410.46	-1641.01	2402.68	4484.91	1180.38	-2336.13	1319.03	-1576.53	1797.35	-3277.61	2011.81	-5188.23
-29.5	804.756	-472.827	1731.49	6154.44	1998.08	-2026.18	796.907	-1889.43	1595.19	-2300.94	1952.92	-4571.35
-29	113.525	491.681	864.035	7323.73	2695.35	-1685.57	511.048	-1984.98	1302.55	-1179.1	1937.9	-3543.79
-28.5	-833.526	1252.57	170.471	7668.98	3409.67	-1279.9	114.578	-1882.34	1011.82	129.076	1911.36	-2192.12
-28	-1757.24	1520.57	-488.929	7508.21	4072.02	-998.652	-692.37	-1766.23	740.396	1382.56	2101.68	-928.14
-27.5	-2512.83	935.149	-1119.04	7121.09	4590.89	-644.965	-1527.11	-1604.93	419.185	2137.4	2487.28	-20.2161
-27	-3036.83	-169.923	-1452.6	6493.85	4918.35	-305.252	-1884.21	-1386.98	-171.836	2403.6	2663.39	376.889
-26.5	-3281.45	-1301.53	-1500.18	5604.93	4875.25	-351.224	-1892.32	-1138.16	-842.136	2538.61	2578.65	138.842
-26	-3354.01	-2282.67	-1434.01	4502.22	4300.07	-577.197	-1779.69	-655.817	-1309.99	2571.2	2501.54	-490.474
-25.5	-3316.65	-3155.68	-1292.86	3307.82	3391.78	-623.7	-1494.55	126.054	-1574.32	2140.16	2377.37	-1283.86
-25	-3104.84	-4070.95	-999.797	2055.92	2386.53	-729.092	-902.904	946.439	-1682.41	1293.7	2112.02	-2129.21
-24.5	-2790.24	-4960.83	-605.653	975.19	1258.75	-1128.83	-79.6859	1538.11	-1738.29	280.293	1667.94	-3013.84
-24	-2556.53	-5466.05	-349.708	401.755	-105.198	-1662.94	789.583	2099.91	-1505.38	-999.016	1117.36	-3713.64
-23.5	-2267.56	-5500.55	-154.816	218.519	-1615.76	-2322.06	1672.72	2802.89	-857.02	-2518.43	664.896	-3693.2
-23	-1857.13	-5175.27	303.883	41.3156	-2820.18	-2820	2420.62	3507.66	-143.907	-3903.01	124.094	-3082.65
-22.5	-1546.48	-4356.74	877.023	-235.394	-3649.49	-2944.88	2923.19	4165.1	531.297	-4661.32	-586.673	-2321.98
-22	-1541.94	-2942.12	1285.92	-188.305	-4262.56	-3151.44	3082.86	4666.06	1160.89	-4791.07	-1130.88	-1466.06
-21.5	-1652.39	-962.318	1579.44	395.339	-4418.45	-3510.87	2698.33	4849.79	1580.69	-4589.54	-1399.28	-543.662
-21	-1437.29	1114.06	1608.86	888.596	-3931.05	-3678.52	1874.54	4682.99	1785.2	-3860.64	-1476.45	363.62
-20.5	-998.162	2692.95	1125.59	954.573	-2766.45	-3557.37	907.674	4175.44	1839.78	-2497.2	-1358.08	1188.94
-20	-672.566	3747.73	358.329	885.578	-1246.6	-3102.6	85.9598	3185.28	1668.99	-948.614	-1010.42	1712.05
-19.5	-300.392	4501.39	-489.516	809.503	-0.37134	-2436.19	-339.927	1897.37	1220.16	512.263	-631.188	1883.63
-19	409.366	4850.22	-1284.21	768.972	703.523	-1917.22	-318.997	765.734	633.563	1946.12	-339.146	1914.74
-18.5	1068.77	4282.36	-1807.84	669.082	1082.63	-1640.15	-175.018	-44.5552	13.8579	3302.3	128.406	1783.76
-18	1286.1	3023.33	-2099.74	386.311	1346.26	-1652.26	-165.711	-485.691	-802.378	4422.34	707.859	1466.08
-17.5	1390.31	1699.39	-2324.86	-32.7313	1261.83	-2102.89	-76.9463	-720.058	-1849.72	5191.73	1002.62	1062.89
-17	1719.92	292.991	-2425.81	-591.609	682.392	-2724.52	98.1287	-954.339	-2821.09	5431.74	951.637	442.292
-16.5	2083.73	-991.017	-2245.81	-1105.63	-142.669	-3059.34	150.329	-1109.17	-3556.08	5127.7	670.872	-452.837
-16	2196.94	-1835.63	-1989.62	-1286.11	-961.448	-2907.37	44.6615	-1029.75	-4100.43	4518.77	0.36908	-1327.14
-15.5	2199.28	-2580.31	-1863.08	-1063.08	-1725.76	-2413.83	-275.397	-633.695	-4386.86	3578.19	-1251.37	-1790.45
-15	2173.3	-3536.67	-1972.33	-516.542	-2473.33	-1947.83	-851.52	90.484	-4359.06	2149.51	-2923.68	-1733.17
-14.5	1973.02	-4378.4	-2338.7	132.178	-3091.34	-1605.88	-1559.27	962.795	-4036.72	473.455	-4776.19	-1289.74
-14	1509.41	-4768.14	-2634.91	705.127	-3516.54	-1197.44	-2186.71	1796.9	-3463.31	-945.906	-6646.45	-505.138
-13.5	790.553	-4841.95	-2825.03	1173.56	-3752.92	-820.402	-2563.59	2675	-2713.43	-1765.17	-8228.8	592.388
-13	-62.3567	-4744.1	-3242.07	1608.05	-3681.39	-797.823	-2736.58	3528.68	-1910.49	-1947.51	-9360.45	1962.12
-12.5	-718.155	-4371.82	-3808.71	2065.29	-3219.87	-942.955	-2733.43	4117.86	-1170.99	-1601.95	-9858.58	3333.29
-12	-874.405	-3857.17	-4101.72	2365.38	-2442.63	-671.045	-2519.09	4306.9	-446.34	-657.956	-8984.56	4289.31
-11.5	-626.658	-3565.06	-4012.34	2343.41	-1449.04	-132.04	-2306.63	4067.38	96.0962	962.231	-6656.64	4745.35
-11	-94.3726	-3617.93	-3805.37	2040.77	-547.086	190.444	-2084.81	3528.69	200.144	2897.51	-3662.97	4768.43
-10.5	774.902	-3815.85	-3496.16	1660.48	-1.54614	521.024	-1724.86	2663.3	-50.895	4605.82	-697.419	4267.05
-10	1828.22	-4105.02	-2799.06	1474.63	266.01	1119.85	-1481.75	1584.16	-527.271	5605.56	1524.88	3184.71
-9.5	2629.33	-4571.53	-1626.15	1239.27	71.0046	1760.54	-1549.9	667.926	-1179.79	5777.33	2806.72	1825.89
-9	3073.24	-5015.57	-195.81	686.901	-817.124	2221.43	-1816.85	23.5873	-1901.66	5459.2	3651.86	378.781
-8.5	3343.29	-5385.01	1066.57	146.946	-2213.25	2453.25	-2025.97	-222.586	-2350.26	4797.49	4409.47	-1409.4
-8	3360.59	-5755.83	1968.41	-196.974	-3810.59	2466.95	-1856.52	-188.47	-2231.14	3854.59	4926.83	-3356.27
-7.5	2976.57	-5850.54	2663.17	-549.522	-5394.72	2301.93	-1266.63	-374.673	-1772.43	2872.46	5113.21	-4761.52
-7	2053.46	-5380.84	3122.44	-946.627	-6675.2	1849.42	-562.578	-788.753	-1336.2	1806.92	4890.21	-5530.71
-6.5	560.849	-4254.98	3225.43	-1148.05	-7341.77	1100.02	-77.6399	-1083.99	-1021.85	590.234	3787.5	-5962.31
-6	-1232.79	-2692.89	3090.47	-1099.86	-7281.59	279.974	119.85	-1077.85	-821.578	-591.215	1701.28	-5607.94
-5.5	-2788.94	-878.673	2740.15	-768.038	-6599.28	-483.183	362.379	-577.911	-662.233	-1366.24	-622.876	-4028.25
-5	-3683.97	1401.4	2031.42	-189.404	-5500.04	-1072.91	914.505	515.764	-484.532	-1331.37	-2630.47	-2076.72
-4.5	-3972.35	3826.42	1122.29	398.055	-4183.92	-1606.28	1671.15	1907.96	-327.661	-571.179	-4486.72	-694.807
-4	-3832.82	5565.49	475.715	935.551	-2934.15	-2240.17	2414.63	2977.46	-190.501	478.781	-6375.74	81.1536
-3.5	-3457.99	6403.45	61.6289	1514.8	-1921.54	-2679.31	2974.53	3556.49	143.17	1433.45	-7863.21	257.1
-3	-2918.4	6558.73	-288.469	2114.78	-1178.61	-2886.63	3349.92	4182.6	660.487	2302.86	-8128.53	-83.8472
-2.5	-2023.21	6091.88	-223.363	2249.72	-705.733	-3057.8	3623.71	5009.28	1099.53	3293.76	-7156.69	-635.824
-2	-790.938	5018.48	121.885	1504.76	-532.499	-2972.18	3664.08	5491.34	1450.51	4254.76	-5766.93	-1242.8
-1.5	469.094	3437.47	179.033	-2574.7	-802.808	-2430.93	3417.52	4433.35	1355.32	4809.5	-4680.39	-3131.67
-1	1324.65	1738.72	-2415.58	-14135.8	-1565.71	-1712.66	1185.02	-3423.39	600.246	4954.86	-5750.72	-5451.04
-0.5	1379.81	-1414.74	-11059.3	-31372.1	-2646.38	-1134.69	-8229.04	-20143.6	-284.559	4466.82	-7490.41	-6695.15
0	721.347	-10093.2	-22973.2	-47675.6	-3796.82	-4703.19	-23398.9	-38661.9	-1039.32	1615.95	-7312.09	-8163.58
0.5	-120.544	-21576	-32902.7	-60176.2	-4860.32	-15900.2	-37256.3	-53640.3	-1592.54	-2131.84	-6350.07	-10549
1	-993.023	-26587.5	-38237.7	-69879	-5906.09	-26303.8	-46231.8	-65107.8	-1739.98	-3486.01	-3880.55	-13046.5
1.5	-1971.42	-24349.1	-36641.6	-75599.8	-7039.12	-27328.7	-45948.3	-73536.3	-1619.49	-4258.43	-1361.65	-13240.1
2	-2897.36	-20476.3	-30609.8	-73586	-7841.41	-22631.2	-37866	-74643.3	-1583.83	-5943.02	-943.266	-12185.9
2.5	-3718.89	-17569.4	-24970.2	-64989.4	-7990.36	-18236.9	-29246.5	-66411.5	-1704.67	-7370.17	-1339.72	-11954.7
3	-4192.22	-15662	-21241.7	-55798.3	-7972.84	-15722.8	-23245.9	-55244.1	-1714.26	-8181.31	-1804.05	-11456
3.5	-4110.7	-14326.7	-19294	-49331.2	-8106.51	-14466.2	-19720.6	-46383.5	-1380.07	-8557.6	-2391.43	-10515.5
4	-3530.15	-13390.1	-18526.7	-45294	-8024.41	-13914.9	-17669	-40246.9	-848.887	-8605.66	-3240.16	-9494.16
4.5	-2402.41	-12895.5	-18551.2	-42711.3	-7486.01	-13641.3	-16452.1	-36016.4	-469.478	-8253.57	-4355.5	-8587.91
5	-869.933	-13031.9	-19241.3	-40987.5	-6603.01	-13449.7	-15891	-33210.3	-330.291	-7494.97	-5854.24	-8330.55
5.5	847.453	-13555.1	-20186.6	-39631.9	-5704.9	-13401.7	-15886.2	-31514.1	-313.927	-6350.8	-7513.04	-8899.74
6	2421.16	-13866.3	-20839.1	-38336.3	-5148.33	-13083.6	-16002.7	-30567.2	-519.551	-5209	-9085.52	-10083.8
6.5	3440.23	-13891.1	-21328.7	-37319	-4824.02	-12364	-15968	-30067.8	-1041.92	-4503.25	-10680.2	-11893.7
7	3848.28	-14252.6	-21935.5	-36909.7	-4626.22	-11647	-15890.6	-29934.2	-1591.13	-4305.69	-12274.8	-14093.8
7.5	3816.2	-15204.5	-22323.1	-36971.3	-4966.91	-11108.7	-15870.7	-30008.7	-1958.01	-4714.7	-13688.8	-16339.7
8	3415.62	-16136.2	-22273.6	-36972.8	-6000	-10646.5	-15937.4	-30093.7	-2268.12	-5730.98	-14685.8	-18537.9
8.5	2525.13	-16474.2	-21936.9	-36595.4	-7330.42	-10334.3	-15930.4	-30107.5	-2569.38	-7173.81	-15265.4	-20495.7
9	1227.1	-16223.3	-21433	-35930.9	-8698.69	-10290.6	-15866.2	-30020.7	-2880.65	-8907.53	-15539.6	-22167.7
9.5	-71.7627	-15829.2	-20980.3	-35238.3	-9915.26	-10325.8	-15802.7	-29989	-3222.76	-10793.5	-15518.7	-23844.2
10	-1194.9	-15399.6	-20563.8	-34596.4	-10740.1	-10414.5	-15488.1	-30001.7	-3436.17	-12648.3	-15322.3	-25373.9
10.5	-2337.93	-14567.7	-19808.4	-33951.9	-11289.6	-10682.1	-14911.8	-29758.9	-3558.71	-14159.2	-15032	-26392.4
11	-3563.45	-13337.6	-18699.6	-33278.2	-11700.1	-11271.3	-14216.8	-29046	-3719.4	-15210.3	-14754.8	-26812.2
11.5	-4480.67	-12065.7	-17450.9	-32670.2	-11954.8	-12245.8	-13458.4	-27730.8	-3645.73	-16013.2	-14524.7	-26539.2
12	-4861.38	-10793.2	-16054.7	-32194.3	-12137	-13204.3	-12720.3	-25829.5	-3190.22	-16437.7	-14242.3	-25687.7
12.5	-5089.32	-9444.24	-14482.7	-31510.5	-12157.4	-13649.8	-11923.4	-23717	-2694.59	-16351	-14181	-24270.5
13	-5290.07	-8305.86	-12688.7	-30214	-11848.2	-13291	-11116.4	-21606.4	-2484.71	-16022.2	-14668	-22201.5
13.5	-5225.32	-7533.71	-10585.3	-28084.6	-11440.5	-12028.8	-10566.2	-19400.4	-2377.59	-15359.7	-15332.4	-19884.4
14	-5032.93	-6931.71	-8354.39	-25107.1	-11285.7	-10221.3	-10299.2	-17244.3	-1980.17	-14356.6	-15828.7	-17586.9
14.5	-4899.58	-6439.5	-6463.84	-21537.3	-11189.4	-8647.73	-10119	-15257.3	-1497.09	-13445.3	-16267.4	-14929.7
15	-4767.39	-6011.8	-5097.67	-17858.1	-10738	-7783.39	-9945.21	-13438.7	-1418.84	-12639.7	-16520.9	-11952.8
15.5	-4481.33	-5434.05	-3954.18	-14593	-9904.89	-7225.28	-9702.02	-11937.8	-2089.45	-11764.7	-16473.2	-9347.02
16	-3920.37	-4803.89	-2665.52	-11691.9	-9206.91	-6499.1	-9166.66	-10789.1	-3596.14	-11217	-16303.4	-7446.04
16.5	-3511.86	-4304.92	-1099.19	-8731.03	-9160.26	-6018.41	-8417.15	-9782.46	-5351	-11438.8	-15927	-6538.92
17	-3872.2	-3697.49	831.103	-5522.18	-9466.83	-6212.8	-7718.74	-8969.03	-6629.02	-12293	-15256	-6899.25
17.5	-5032.96	-2721.8	3071.51	-2019.55	-9530.84	-6828.59	-7160.41	-8393.64	-7312.31	-13370.1	-14592.1	-8296.09
18	-6486.23	-1122.49	5550.25	1800.23	-9322.52	-7512.57	-6628.52	-7676.84	-7539.86	-14268.9	-13993.2	-10106.2
18.5	-7660.08	1521.3	8590.79	6034.42	-9253.27	-8150.3	-5999.6	-6964.82	-6911.85	-15004.1	-13387.9	-11729.1
19	-8278.7	5247.32	12289.8	10761.7	-9533.59	-8671.04	-5283.59	-6658.44	-4944.84	-15723.6	-13049.5	-12833
19.5	-8308.21	9995.6	16632.5	16057.2	-10214.6	-8814.77	-4552.15	-6633.68	-2192.82	-16208.2	-13144.8	-13199.4
20	-8061.45	15779.2	21795.7	21645.8	-11113.8	-8426.56	-3955.53	-6698.61	360.458	-16222.3	-13564.7	-12684.5
20.5	-7477.83	22201	27450.9	26685.7	-11461.7	-7863.06	-3575.09	-6891.29	2045.54	-15831.7	-14129	-11240.3
21	-6221.37	28807.5	32592.2	30531	-10769.2	-7295.29	-3534.15	-7189.6	2627.45	-15314.3	-14764.2	-9307.43
21.5	-4878.63	35053.7	36160.3	32710.9	-9345.63	-6377.21	-3709.04	-7465.02	2460.46	-14755.4	-15783.9	-7397.39
22	-3822.88	39915.2	37800.8	32984.7	-7709.74	-5359.33	-3804.01	-7846	2028.1	-14107.2	-17308.1	-5425.99
22.5	-2490.93	42597	37738.7	31652.3	-6383.75	-4641.55	-3782.12	-8474.36	1457.9	-13506.7	-19035	-3554.92
23	-572.512	43189	36272.6	29110	-5656.47	-4042.24	-3631.31	-9395.32	586.514	-13049.7	-20730.7	-2281.03
23.5	1602.97	42019.3	33768.3	25710.1	-5326.62	-3550.83	-3556.74	-10510.5	-358.935	-12517.5	-21956.5	-1688.02
24	3681.43	39401.4	30758.7	22011	-5249.62	-3297.36	-3787.6	-11502.9	-1140.35	-11947.9	-22487.1	-1658.54
24.5	5891.02	35955.1	27567.2	18537.1	-5662.65	-3232.07	-4138.09	-12357.4	-2120.17	-11640.6	-22280.4	-2301.27
25	8434.81	32306.9	24217.3	15342.7	-6843.27	-3398.37	-4460.43	-12987.5	-3219.43	-11528.1	-20907.4	-3760.74
25.5	10697.1	28817.4	20910	12304.3	-8321.32	-3958.19	-4937.06	-12937	-3770.11	-11577.5	-18410.1	-5837.31
26	12146.1	25621	17646	9311.33	-9346.85	-4771.72	-5544.62	-12315.6	-3729.35	-11993.4	-15331.8	-8286.78
26.5	13077.2	22746	14026.5	6265.77	-9790.6	-5480.66	-5857.8	-11926.8	-3481.73	-12647.4	-12380.7	-10896.7
27	13817.9	19827.7	10154.7	3425.24	-9732.87	-5818.23	-5717.14	-12048.8	-3091.38	-13165.9	-10347	-13093
27.5	14459.3	16617.1	6926.44	1051.62	-9220.69	-5913.81	-5406.21	-12305.2	-2662.53	-13467.7	-9331.44	-14399.7
28	15186.6	13951	4829.18	-1067.46	-8198.95	-5907.44	-5175.44	-12534.8	-2240.64	-13600.6	-8897.19	-14970.1
28.5	15920.4	12303.3	3380.5	-2998.4	-6924.28	-5460.04	-5105.62	-12674.1	-1783.97	-13682.2	-8631.1	-14925.3
29	16395.3	11019	2567.53	-4313.97	-5797.36	-4423.63	-5128.77	-12593.1	-1462.38	-13752.6	-8358.16	-14147.5
29.5	16307.8	9942.55	2937.88	-4527.07	-4859.07	-2883.76	-4955.28	-12228	-1333.83	-13536.9	-8222.93	-12725.9
30	15429.9	9543.18	4346.23	-2979.77	-4272.58	-1055.68	-4357.05	-11520	-1706.6	-12902.4	-8425.1	-10957.6
30.5	14152.3	10025	6834.94	1278.02	-3998.01	639.048	-3565.64	-10401.7	-3083.16	-12171.1	-9022.4	-9274.2
31	13008.8	11722.3	11678.7	8625.43	-3717.67	2133.76	-2916.27	-9000.2	-5132.46	-11696.7	-9819.95	-8093.65
31.5	12087	15402.8	19475.3	18171.6	-3611.13	3425.17	-2280.35	-7530.47	-7201.88	-11380.7	-10619.2	-7526.31
32	11406.3	21449.7	28822.1	28556.3	-4061.11	4079.17	-1445.36	-6028.47	-9182.89	-11050.1	-11445.9	-7498.24
32.5	10911.1	29022.2	38086.1	38852.5	-5009.36	4120.06	-464.496	-4452.1	-10894.8	-10751.5	-11891.3	-8015.27
33	10295.8	36660.8	46646.4	48467.9	-6056.13	3940.63	682.813	-2828.62	-11785.9	-10579.7	-11682.5	-8887.14
33.5	9701.98	43917.4	54142.3	56811.8	-6970.81	3468.16	1937.52	-1235.4	-11385.4	-10679.3	-11341.5	-10034.2
34	9488.38	50955.7	59871.5	62932.2	-7860.97	2738.7	2951.47	206.434	-9542.14	-11091.2	-11129.9	-11636.6
34.5	9462.63	57108.1	63136.4	65845.3	-8632.75	2116.73	3620.32	1424.83	-6561.93	-11660.2	-10956	-13457.8
35	9297.31	61119	63546.5	65375.3	-8977.21	1724.37	4237.43	2532.73	-3438.52	-12282.1	-10801	-15024.2
35.5	8954.23	62187.4	61317.3	62367.3	-8856.55	1401.32	4850.77	3387.76	-1261.93	-12954.2	-10646.6	-16272.1
36	8505.23	60543.3	57312.8	57896.4	-8311.29	1099.12	5372.59	3836.53	-258.945	-13593.9	-10590.4	-17245.5
36.5	8155.19	57163.7	52467	52628.2	-7302.62	752.75	5826.87	4007.98	-130.274	-14050.8	-10722.5	-17773.4
37	8013.62	53142.9	47295.4	47012.9	-5918.63	236.026	6059.55	3870.64	-587.901	-14376.1	-10824.8	-17812.8
37.5	7730.35	49155.7	42358.9	41444.3	-4300.63	-115.148	5868.71	3436.53	-1258.37	-14715.8	-10880.1	-17174.2
38	6989.98	45361	38177.8	36319.1	-2554.18	43.8545	5281.03	2831.25	-1926.52	-14934.9	-11079.1	-15726
38.5	5821.52	41680	34650.1	31961.6	-942.906	452.5	4724.54	2132.83	-2545.49	-14966.6	-11497.1	-13839.9
39	4532.32	37894.8	31717.4	28400.1	160.57	727.128	4357.59	1172.25	-2869.75	-14894	-12137.7	-11718.8
39.5	3542	34308.7	29316.2	25518.9	497.635	994.43	3966.17	-217.059	-2773.16	-14607.7	-12698.8	-9535.41
40	3228.65	31563.7	27091.8	23245	62.9268	1498.68	3554.56	-1660.84	-2572.98	-14342.8	-12986.4	-7696.47
40.5	3828.4	29509.7	25017.8	21371.6	-712.263	1818.69	3006.1	-2789.82	-2472.21	-14493.9	-13038.8	-6354.11
41	5134.42	27713.5	23171.3	19833.9	-1445.66	1491.6	2147.17	-3676.38	-2330.68	-14607.2	-12827.9	-5383.83
41.5	6745.6	25970.7	21233.4	18953.2	-2266.26	584.93	1301.97	-4543.58	-2139.83	-14227.3	-12371.6	-4762.72
42	8604.25	24177.9	19248.9	18820.2	-3258.88	-616.826	908.844	-5311.1	-1958.54	-13868.5	-11767.3	-4730.79
42.5	10790.5	22668.5	17750.2	19138.1	-4313.55	-1852.93	803.904	-5743.34	-1651.86	-13821.6	-11036.7	-5306.9
43	12925.6	21942.8	16975.3	19659.8	-5443.29	-3032.35	679.766	-5939.66	-1295.23	-13832.7	-10206.9	-6031.7
43.5	14470	21944.9	16699.1	20093	-6716.08	-3988.07	686.591	-6026.48	-1162.93	-13969	-9407.71	-6583.06
44	15265.4	22262.1	16525.7	20431.3	-7985.8	-4509.68	1047.23	-6041.92	-1025.75	-14293.9	-8749.66	-7250.34
44.5	15616	22641.2	16572.8	21098.5	-9016.82	-4586.14	1541.78	-6039.53	-575.608	-14760.8	-8294.86	-8337.03
45	15921.9	23177.1	16962.9	22118	-9740.14	-4124.77	1985.43	-5720.5	-31.9121	-15434.4	-8031.72	-9453.92
45.5	15981.1	24053.2	17516.9	23324	-10090.5	-3173.25	2502.31	-4920.45	222.62	-16220	-7956.85	-10212
46	15198.4	25302.8	18417.1	24928.9	-9807.35	-2143.04	3216.8	-3988.46	-59.4688	-17076	-8159.95	-10560.5
46.5	13615.8	26900.9	20107.9	27035.7	-8804.07	-1137.52	4289.24	-3073.46	-981.771	-17799.1	-8665.87	-10475.9
47	12041.3	28739.7	22930.8	29256.5	-7465.4	-32.7305	5556.76	-2233.68	-2356.88	-18102.9	-9341.59	-9974.9
47.5	10815.2	31008.4	26336.1	31293.2	-6124.73	1074.61	6611.25	-1696.43	-3940.35	-18183.5	-10266.9	-8964.78
48	9758.61	33640.1	29507.7	33235.6	-5045.72	1999.79	7403.02	-1417.27	-5721.11	-17898.7	-11470.8	-7692.96
48.5	9074.52	36086.6	32423.5	34896.3	-4554.63	2525.8	8204.27	-1265.25	-7425.96	-16685.8	-12572.9	-6560.8
49	8941.29	38157.7	35026.8	35850	-4707.44	2597.61	9109.19	-1171.42	-8878.84	-14697.3	-13474.7	-5757.55
49.5	8959.13	39546.4	36888.7	36116	-5425.89	2414.85	10006.7	-983.335	-10293.4	-12636.2	-14318.5	-5580.25
50	8645.19	39729.6	37658.3	36120.1	-6634.79	2087.72	10753.1	-702.302	-11412.6	-11149.5	-14899.4	-6025.5
50.5	8085.76	38842.9	37557.5	36183.3	-8032.52	1657.45	11273.3	-338.094	-11411.2	-10806.4	-14860.8	-6748.03
51	7594.1	37440.8	37028.2	36117.3	-9332.39	1041.58	11704.8	165.023	-10110.5	-11525.3	-14240.9	-7566.79
51.5	7069.54	35761	35942.2	35695.7	-10383.8	41.6953	12127.8	640.089	-8058.58	-12605.2	-13315.6	-8563.01
52	6356.21	33793.1	34298.9	35221	-11299.8	-1199.36	12512.7	1008.14	-5319.19	-13488.4	-12376.3	-9949.16
52.5	5643.74	31735.9	32640.3	34928.8	-12261.1	-2162.91	12757.6	1565.09	-2376.89	-13929.5	-11551.3	-11679.6
53	5097.53	29984.8	31402.5	34716.9	-12751.5	-2443.81	12711.6	2279.25	-220.745	-14080.9	-10610.5	-13398.1
53.5	4732.97	28756	30642.2	34636.6	-12352.2	-2209.15	12175.7	2772.67	1021.07	-14134.8	-9729.36	-14805.5
54	4406.56	28152.4	30282.3	34753.8	-11281.6	-1765.79	11255.4	2981.86	1474.55	-14095.4	-9128.8	-15857.7
54.5	3955.54	27935.7	30157.2	34949.4	-9761.11	-1162.92	10315	2959.43	1220.56	-14021.5	-8536.9	-16576.1
55	3529.1	27581.6	30179.5	35041.7	-8066.03	-264.468	9201.59	2743.28	541.81	-13886.1	-8210.12	-16379.7
55.5	3118.48	27149	30382	34996.1	-6523.49	1033.36	8051.28	2504.28	-200.995	-13689.2	-8741.59	-14775
56	2316.24	26934	30510.4	35148.6	-5363.34	2453.85	7724.6	2321.62	-865.634	-13568.5	-10098.3	-12418.7
56.5	1097.01	26909.2	30457.4	35766.6	-4976.78	3755.63	8331.31	1945.59	-1608.19	-13646.5	-11675.5	-10202.2
57	-138.752	27164.5	30613	36719.3	-5607.43	5038.38	8985.01	1369.75	-2234.67	-13823.7	-13069.9	-8777.15
57.5	-1272.02	27781.6	31375.4	37480.2	-6906.6	6203.7	9207.68	889.829	-2569.06	-13916.8	-14202.1	-8459
58	-2213.62	28812.5	32734.7	37633.4	-7992.4	6833.12	9323.97	473.728	-2647.83	-14120.5	-14775.4	-8782.69
58.5	-2462.33	30498.7	34277.1	37377.6	-8281.92	6615.15	9721.58	149.19	-2345.77	-14739.4	-14633.3	-9198.17
59	-1748.84	32343.5	35404.8	37153.7	-8144.09	5653.31	10210.8	124.665	-1925.86	-15641.2	-13583.5	-9495.76
59.5	-670.475	33329.1	35893.8	37116.2	-8002.89	4296.41	10141.2	170.079	-1708.83	-16440.9	-11608.2	-9582.16
60	29.9788	33259.2	36346.4	37167.4	-7872.98	2862.62	9288.2	-82.5677	-1507.63	-17112.1	-9386.13	-9576.47
60.5	410.546	32853.2	37224.4	37301.8	-7534.71	1629.55	8061.7	-626.047	-940.043	-17850.9	-7487.58	-9498.25
61	674.812	32867.4	37913	37545.8	-6844.76	565.111	6856.02	-1032.73	-213.669	-18753.3	-6509.2	-9223.77
61.5	584.023	33220	37628.9	37966.4	-6311.68	-496.115	5761.16	-889.473	-13.8555	-20039.6	-6959.21	-8953.73
62	66.6362	33477.5	36657.5	38708.8	-6398.26	-1358.81	4919.12	-411.136	-224.298	-21566.7	-8029.72	-8812.63
62.5	-686.895	33623.2	35737	39706.9	-6846.23	-1881.89	4619.63	169.046	-480.78	-22565.4	-8468.56	-8734.75
63	-1378.23	33835	35053.9	40665.2	-7383.92	-1975.78	4824.12	876.851	-937.453	-22902.2	-8426.87	-8782.26
63.5	-1806.09	34301.3	34672.7	41449.9	-7849.76	-1171.11	5047.25	1697.26	-1557.75	-22940.7	-8834.76	-8827.57
64	-2022.09	35224	34549.7	42006.1	-8183.83	470.095	5022.78	2563.41	-2062.35	-22377.8	-10067.8	-8783.69
64.5	-2100.04	36401.7	34244.4	42054.8	-8632.85	2324.25	5113.27	3271.15	-2430.5	-20915	-11943.3	-8788.19
65	-2089.73	37182	33552.3	41479.7	-9276.02	4046.66	5644.33	3821.05	-2781.83	-19024.3	-14028	-8939.5
65.5	-1948.29	37455.1	32796	40585.2	-9867.86	5382.82	6387.68	4324.35	-3139.22	-17518.7	-15705.8	-9297.95
66	-1571.47	37637.6	32279.6	39517.5	-10226.7	6332.5	7128.89	4603.48	-3501.42	-17153.7	-16228.2	-9605.73
66.5	-1111.12	37662.2	31939.8	38334.2	-10410.1	6814.97	8008.13	4657.45	-3847.74	-18202.5	-15299.3	-9645.04
67	-791.247	37266.2	31833.8	37396.5	-10508.3	6478.65	9147.99	4754.31	-4114.77	-19976.3	-13302.5	-9613.55
67.5	-519.044	36597.2	32078.2	36797.9	-10333.7	5402.32	10236.5	4849.18	-4097.94	-21549.7	-10877.9	-9627.88
68	-178.66	35952.2	32248.8	36188.4	-9733.97	3929.59	10827.9	4832.23	-3654.94	-22796.2	-8793.5	-9555.68
68.5	-216.605	35324	31990.3	35497.3	-9190.52	2409.19	10915	4814.79	-2821.73	-23863.5	-7478.31	-9143.93
69	-1013.01	34510.8	31373.6	34952.7	-9087.54	1124.66	10621.4	4849.85	-1662.54	-24265.5	-6565.17	-8355.2
69.5	-1860.88	33676.3	30713.4	34758.7	-9181.5	253.474	10177.4	4797.7	-483.561	-23529.8	-5601.31	-7558.71
70	-2153.99	32942.2	30346.1	35080.3	-9306.01	44.248	9806.33	4535.36	352.336	-22002	-4648.45	-7037.45
70.5	-2351.24	32288	30359.3	35634.7	-9498.86	538.599	9464.3	4334.49	929.951	-20404.7	-3865.56	-6660.6
71	-2889.39	32021.9	30694	36020.9	-9635.59	1426.02	9184.72	4373	1522.01	-19264.2	-3219.02	-6331.13
71.5	-3538.03	32224.2	31200.3	36385.3	-9596.75	2374.95	9025.53	4495.53	2019.44	-18491.4	-2668.33	-6215.26
72	-3923.62	32595.1	31912	37056.5	-9539.5	3301.94	9018.07	4940.53	2296.02	-17226.3	-2523.65	-6472.43
72.5	-4036.33	32963.5	32765.6	38055	-9551.75	4322.29	9192.13	5890.45	2427.17	-15199.5	-3036.96	-7270.83
73	-4178.71	33579.2	33571.3	39066.3	-9421.29	5317.88	9546.13	6880.2	2327.97	-13169.6	-3971.44	-8486.57
73.5	-4545.57	34542.9	34457	39871.1	-9110	6025.32	9973.6	7316.48	2057.18	-11738.5	-5116.52	-9626.17
74	-5022.73	35359	35653.5	40461.9	-8761.47	6522.89	10424.8	7167.8	1714.58	-11187.5	-6297.91	-10559.7
74.5	-5456.05	35814.7	36997.9	40600.8	-8430.27	6763.48	11021.6	6835.63	1261.69	-11407.7	-7309.03	-11308.8
75	-5886.78	36208.7	37942.1	40220.1	-8103.7	6375.62	11718.6	6437.37	868.664	-11869.7	-8199.94	-11703.6
75.5	-6398.03	36457.6	38264.4	39667.2	-7763.26	5361.31	12485.2	5905.96	654.862	-12058	-8771.67	-11771.7
76	-7008.28	36327.1	37983.3	39307.6	-7604.1	3941.11	13331.7	5130.27	568.641	-11702.5	-8673.97	-11677.5
76.5	-7892.54	36147.9	37267.2	39335.4	-7652.31	2441.58	13995	3984.96	545.328	-10935.8	-8073.8	-11463.7
77	-9123.51	36280.2	36665.9	39426.5	-7662.27	1397.43	14259.8	2844.75	646.503	-10070.5	-7198.59	-10922.4
77.5	-10302.2	36595.3	36323.6	39052.5	-7470.56	924.834	14199.1	2107	1197.36	-9347.1	-6144.58	-9843.16
78	-11111.2	36727.5	35943.7	38405.9	-7013.33	792.633	14073.4	1658.24	2133.52	-8999.62	-5028.71	-8533.16
78.5	-11510.4	36626.4	35336.7	38190.5	-6587.84	1105.78	14100.5	1461.15	2966.99	-9207.73	-4008.1	-7376.55
79	-11531.5	36556.1	34402.9	38487.8	-6376.57	2239.51	14048.7	1703.71	3684.46	-9963.74	-3264.63	-6287.48
79.5	-11467.2	36551	33520.6	38852.8	-6120.71	4148.75	13774	2458.42	4496.68	-11038.6	-2840.51	-5429.24
80	-11367.8	36506.1	33210.2	39102	-5835.18	6236.49	13575.1	3442.72	5122.59	-12518.9	-2743.66	-5072.3
80.5	-10934.7	36422.9	33113.4	39307.8	-5631.1	8026.37	13482.9	4320.58	5450.49	-14664.7	-2874.99	-5236.87
81	-10085.9	36204.7	32505.3	39522	-5471.4	9452.81	13475.9	5079.54	5554.51	-17221.1	-3360.48	-6049.96
81.5	-8961.61	35704.2	31656.7	39738.1	-5061.23	10557.7	13723.5	5792.81	5210.73	-19702.1	-4444.91	-7231.5
82	-7760.2	34987.2	31484.7	39897.9	-4134.05	11311	14214.1	6549.42	4640.15	-21746.5	-6010.13	-8370.4
82.5	-6741.09	34355.9	32095.5	39883.8	-3184.69	11686.8	14856.3	7292.03	4368.52	-23241.8	-7905.38	-9490.78
83	-6193.49	33846.2	32746.2	39699.5	-2625.53	11744.5	15476.6	7786.72	4343.17	-23801.6	-9851.02	-10507.9
83.5	-6112.39	33166.7	33082.1	39485.6	-2494.13	11570.4	15977.6	8122.59	4089.56	-22699.7	-11397.8	-11123.2
84	-6442.1	32389.1	33379.2	39357.6	-2548.15	11102.4	16521.4	8433.06	3923.2	-20145	-12238.6	-11290
84.5	-7193.34	31571.6	33509.8	39270.5	-2371.83	10280	16942.9	8651.76	4427.68	-17189.1	-12371.1	-11040
85	-7981.32	30664.5	33065.7	39196.8	-2390	9293.05	17076.7	8817.12	5212.87	-14658.8	-11686.7	-10529.9
85.5	-8474.47	29774.1	32233.5	39155.4	-3025	8134.27	17137	8939.9	6003.01	-12733.3	-9737.15	-10302.8
86	-8650.48	28770.2	31390.7	39124.4	-3588.58	6963.65	17060.8	8983.14	6877.38	-11259.5	-6918.25	-10239.6
86.5	-8506.98	27560.8	30604.1	39040.1	-3569.15	6495.7	16808	8797.07	7612.94	-10370.4	-4410.85	-9556.2
87	-8233.44	26213.8	29866.8	38825.7	-3383.42	6859.3	16502.9	8101.36	8025.53	-10086.7	-2937.56	-8173.19
87.5	-8070.77	24889.1	29183.3	38778.4	-3294.97	7576.16	16027	6800.69	7886.73	-10141.9	-2426.95	-6666.29
88	-7833.81	23949.8	28694.8	39001.1	-3242.09	8375.07	15239.5	5335.8	7130.26	-10518.3	-2297.07	-5388.7
88.5	-7243.36	23451.5	28581.9	39075.5	-3273.54	9146.81	14297	4293.65	6180.89	-11342.6	-2380.65	-4378.56
89	-6562.32	23188.2	28684.7	38932	-3399.22	9895.54	13540	3606.81	5449.43	-12422.6	-2997.57	-3819.32
89.5	-6193.18	23149.3	28849.1	38916.6	-3548.94	10722.7	13168.1	3302.72	5001.72	-13450.8	-4146.51	-3936.15
90	-6124.35	23347.2	29183.1	39183.1	-3625.99	11590	13266.8	3876.33	4694.77	-14365.9	-5526.29	-4569.05
90.5	-6265.65	23845.9	29890.6	39584.4	-3533.88	12233.5	13528.3	5280.65	4469.03	-15159.4	-6961.73	-5371.34
91	-6743.31	24636.3	30911.1	40008.6	-3267.31	12318.1	13324.4	6916.54	4216.96	-15781.5	-8228.49	-6213.08
91.5	-7485.37	25451.6	31731.6	40460.4	-3162.47	11851.5	12677	8216.03	3697.44	-16140.1	-8878.25	-7102.64
92	-8065.52	25911.8	32258.7	40869.9	-3449.74	11204.3	12011.6	9045.72	3187.3	-16121.1	-8845.71	-8197.76
92.5	-8428.34	25971.4	32882.1	40997.2	-3681.46	10373.2	11594.6	9610.92	3111.16	-15555.6	-8341.13	-9732.95
93	-8807.15	26135.8	33393.3	40852.2	-3601.02	9096.49	11439.6	9723.78	3224.66	-14484.6	-7477.73	-11416.7
93.5	-9313.35	26353.5	33418.5	40866.6	-3475.23	7495.43	11381.7	9115.66	3242.8	-13176.4	-6638.07	-12566.2
94	-10109.2	25837.4	33153.6	41133.8	-3595.3	5713.97	11489.3	8008.28	3412.32	-11935.8	-5875.4	-12809.2
94.5	-11034.4	24431.2	32868.7	41293.1	-3959.72	3986.66	11692	6901.64	4004.76	-11099.5	-5028.72	-12301.3
95	-11701	22806.3	32741	41369.5	-4133.52	2717.57	11826.9	6085.39	4667.05	-10587.5	-4288.71	-11248.6
95.5	-11984.7	21657.9	32766.9	41470.7	-4216.96	1959.78	12067.9	5389.43	4939.51	-10239.1	-3781.97	-9528.92
96	-12113.7	21074.2	32502.4	41283.1	-4591.84	1835	12551.7	4960.28	4939.27	-10155	-3695.26	-7381.81
96.5	-12466.7	20756.4	31697.7	40834.1	-5054.8	2627.82	13181.7	4943.91	5130.09	-10379.3	-3984.98	-5414.61
97	-12863.9	20400.2	30918.8	40399.3	-5444.96	4303.48	13880.6	4839.6	5678.67	-10896	-4344.44	-3897.99
97.5	-12695.6	19942.1	30461.3	39880.2	-5643.5	6572.23	14503.5	4490.72	6180.87	-11720.2	-4780.6	-2919.08
98	-11967.4	19529.2	29849.9	39086.3	-5531.96	8805.28	14976.4	4344.59	6472.73	-12802.2	-5506.26	-2583.5
98.5	-11066.3	18751.5	29169.3	38148.1	-5251.32	10383	15793.1	4648.31	7064.45	-14034.3	-6547.63	-2814.16
99	-10192.3	17374.5	28795.4	37247.5	-4918.13	11290.2	17126.5	5098.71	8402.06	-15113.5	-7569.22	-3348.51
99.5	-9473.79	15663.5	28258.6	36391.5	-4479.17	11744.2	18352.5	5321.58	10187.5	-15684.6	-8306.61	-4102.74
100	-8716.38	13579.1	27276.2	35737.6	-3729.12	11635.9	19085.5	5247.46	11749.1	-15887.5	-8899.05	-5133.5
100.5	-7763.99	11297.5	26306.8	35512.3	-2684.17	11007.4	19363.3	4799.98	12606.5	-15874.4	-9427.17	-6437.62
101	-6939.88	9402.79	25416.2	35668.9	-1735.31	10172.2	19318.8	3931.31	12588.1	-15444.5	-9721.57	-7909.81
101.5	-6305.23	8098.37	24687	35942.2	-1219.99	9201.23	19036.3	3170.07	11877.9	-14749.7	-9576.15	-9226.23
102	-5727.12	6913.87	24307.9	36132.8	-1243.92	8087.29	18576.8	3203.44	10852.8	-13993.9	-9164.96	-10265.4
102.5	-5336.52	5693.33	23926.4	36268.2	-1429.85	7042.95	18069.2	3900.37	9978.2	-13114.2	-8945.23	-10929.9
103	-5123.93	4838.77	23421.9	36511.3	-1308.82	6388.86	17470.1	4717.12	9429.32	-12455.7	-8709.51	-10973.1
103.5	-4850.47	4538.39	22911.1	36722.6	-1131.43	6087.27	16679.4	5533.16	8964.03	-12246.9	-8012.7	-10495
104	-4314.39	4744.25	22246.3	36749.9	-1052.76	6148.11	15940.5	6486.68	8464.67	-12277.7	-6931.86	-9646.32
104.5	-3825.13	5485.69	21233.7	37090.3	-925.646	6935.58	15552.2	7503.64	7864.99	-12716.9	-5727.78	-8316.36
105	-3862.77	6757.14	20058.8	37978.7	-716.06	8306.87	15488.8	8174.82	6966.35	-13986	-4631	-6701.46
105.5	-4349.94	8229.48	19093.1	38960.5	-273.115	9598.75	15673.3	8058.68	5722.76	-15913.3	-3776.11	-5285.67
106	-4964.48	9582.64	18606.4	39723.8	316.879	10498.1	16130.2	7320.63	4526.44	-17829.8	-3183.36	-4193.31
106.5	-5634.19	10747.7	18793.6	40289.9	1071.91	11125.5	16688.2	6531.54	3760.96	-19516.4	-3021.1	-3541.64
107	-6564.88	11808.7	19499.9	40779	2032.02	11734.8	17014.3	5965.07	3237.15	-21224.4	-3468.24	-3491.39
107.5	-7859.67	12741.3	20607.9	41079.5	2937.78	12187.6	17069.7	5481.75	2642.41	-22560.7	-4188.8	-3889.06
108	-9155.62	13269.5	22235.9	41229.2	3926.45	12076.8	16952.6	4750.44	2179.64	-22672.9	-4684.9	-4600.13
108.5	-10078.1	13352.3	24078.5	41434.7	5050.02	11599	16718.8	3855.55	2454.85	-21595.6	-4877.71	-5652.64
109	-10600.7	13226.1	25604.8	41609.4	5768.62	11111.9	16568.4	3141.22	3619.27	-20289.2	-4737.27	-6962.45
109.5	-10605	13188.6	26851.2	41870.9	5879.6	10486.8	16609.5	2659.91	5289.8	-19372.4	-4205.77	-8376.52
110	-10094.1	13385.5	27931.3	42301.5	5804	9550.14	16632.3	2361.26	6982.8	-18246.8	-3479.72	-9770.68
110.5	-9439.1	13585.4	28453.9	42617.8	5625.88	8454.67	16386.5	2193.51	8081.1	-16225.3	-2710.53	-10929.3
111	-8940.56	13568.6	28280.8	42703.1	5131.25	7381.87	15911.2	2155.17	8550.93	-13428.7	-1892.31	-11692.2
111.5	-8551.56	13528.7	27913.8	42800.2	4628.99	6438.71	15496.5	2278.84	9011.45	-10321.8	-1194.86	-12039
112	-7818.02	13730.7	27680	43176.4	4436.26	5739.12	15463.7	2601.16	9611.16	-7667.15	-726.669	-11835.7
112.5	-6628.7	13973.3	27290.4	43556	4281.36	5305.23	15808.3	3205.67	9995.79	-6075.22	-210.998	-11145.9
113	-5568.91	13862.2	26467.3	43604.4	4030.54	5155.44	16402.8	3776.58	10029.4	-5441.35	494.53	-10217.5
113.5	-4989	13217.9	25266	43457.7	4114.04	5349.78	17295.2	3926.91	10078.7	-5211.68	1100.73	-9001.99
114	-4813.57	12198.4	23847.8	43255.9	4648.66	5954.29	18230	3856.18	10536.5	-5160.89	1475.81	-7493.88
114.5	-4825.15	11070.2	22474.9	43008.9	5472.51	6891.55	18840.7	3766.68	11267.3	-5503.5	1794.14	-5847.74
115	-4634.09	9730.98	21496.8	42398.4	6532.61	7807.56	19285.2	3616.7	11864.5	-6387.11	1929.79	-4471.67
115.5	-4233.38	8111.24	20826	41217.7	7310.69	8521.13	19718.9	3392.78	12350	-7623.68	1706.79	-3787.11
116	-4305.15	6584.02	19994.5	39878.4	7558.48	9298.83	19995.8	3017.89	12850.5	-8837.3	1178.07	-3649.12
116.5	-4996.02	5459.71	19151.3	38748.7	7723.59	10073.2	20150.9	2591.73	13090.5	-9978.2	424.624	-3915.6
117	-5695.99	4644.55	18628.3	37942.9	8007.63	10359.9	20351.6	2297.95	12933.3	-11138.5	-325.364	-4700.9
117.5	-6112.22	3686.42	18076.2	37385.6	8243.46	10144.2	20560.1	1879.56	12460.9	-12087.7	-863.148	-5932.83
118	-6083.72	2434.61	17071.5	37065.6	8232.57	9723.93	20601.8	1294.28	11768.4	-12585.7	-1214.77	-7318.23
118.5	-5718.69	1381.46	15749.1	37179	8011.68	9241.96	20329.7	849.08	11019.8	-12656.5	-1354.86	-8453.94
119	-5450.59	670.22	14750	37590	7661.73	8778.02	19888.4	555.485	10268.4	-12303.9	-1089.8	-9265.32
119.5	-5409.49	121.933	14227.7	37861.8	7200.29	8415.11	19697.5	489.651	9485.57	-11448.6	-584.181	-9937
120	-5578.29	-218.194	13740.8	37822.7	6961.49	8142.25	19614.9	720.979	8802.51	-10226.4	-240.487	-10434.3
120.5	-5747.82	-291.325	13237.1	37562.9	7116.36	7718.85	19351.1	940.972	8288.52	-8809.16	41.4704	-10746.5
121	-5781.35	95.7703	12836.3	37233.4	7171.87	6988.07	19010.4	1002.28	7898.79	-7240.45	218.099	-10851.5
121.5	-5887.15	980.155	12649.4	37044.6	6965.96	6302.54	18540	1156.47	7665.34	-5796.87	-107.492	-10487.7
122	-5961.77	1983.53	12884.2	37040.6	7087.57	5845.12	18101.9	1398.34	7605.58	-4616.19	-589.968	-9577.8
122.5	-5826.71	3005.91	13633.9	37082.4	7710.84	5266.65	17875.8	1442.76	7807.15	-3623.82	-743.649	-8417.24
123	-5564.19	4130.11	14849.7	36925.7	8432.22	4611.91	17647.4	963.38	8357.01	-2967.22	-913.083	-7329.12
123.5	-5178.76	5095.63	16173	36593.4	9022	4286.78	17370.7	-250.939	9069.04	-2771.71	-1468	-6458.4
124	-4751.81	5533.84	17182.8	36387.8	9487.45	4141.65	17140.8	-1822.77	9752.89	-3036.95	-2222.57	-5840.18
124.5	-4471.89	5430.71	17935.5	36293.6	9942.99	3753.86	16919.6	-3320.17	10312.2	-3690.56	-2847.35	-5485.42
125	-4164.68	5282.81	18531.8	36218.6	10418.1	3088.37	16605.2	-4665.86	10648.2	-4454.99	-3281.25	-5421.33
125.5	-3497.7	5292.65	18926.6	36281	10606	2732.16	16043.2	-5458.08	10884.9	-5061.69	-3796.4	-5735.58
126	-2890.4	5349.61	19343.6	36508.2	10366.9	3367.35	15290.3	-5545.99	11234	-5583.41	-4389.89	-6326.35
126.5	-2977.53	5564.58	19778.5	36928	9790.29	4629.15	14556.3	-5255.02	11718.3	-6114.69	-4550.73	-7043.43
127	-3506.8	5902.7	20058.6	37528.9	8921.88	5672.58	13872.3	-4565.68	12194.5	-6535.86	-4048.59	-7958.68
127.5	-4007.13	6177.01	20421	37835.9	8163.9	6370.79	13324.1	-3705.08	12446.8	-6798.54	-3187.97	-8893.92
128	-4418.41	6153.4	20845	37641.8	7777.49	7111.7	12979.4	-2988.27	12380.1	-6743.27	-2212.28	-9466.38
128.5	-4746.43	5687.6	21044.8	37348.9	7378.27	7894.4	12942.4	-2409.55	12275.9	-6172.15	-1320.04	-9618.5
129	-5149.47	4920.53	21145.8	37018.5	6988.33	8211.78	13288.3	-2098.72	12286	-5518.2	-678.623	-9648.03
129.5	-5678.22	4075.14	21400.4	36499.9	7096.83	7978.05	13815.9	-2018.71	12173.1	-5197.79	-86.8599	-9878.83
130	-6206.1	3286.13	21697.4	35733.5	7582.02	7622.69	14383.4	-1946.06	11894.7	-4998.32	630.195	-10295.2
130.5	-6708.82	2382.69	21514.2	34658.4	8234.84	7386.73	14891	-1779.67	11586.6	-4774.4	1337.27	-10726.3
131	-7084.68	1334.81	20583.1	33372.3	9119.57	7176.24	15274.8	-1535.38	11373.8	-4617.38	1869.93	-11171.9
131.5	-7391.83	438.299	19267.4	32081	10131.6	6736.09	15602.3	-1325.45	11453	-4544.59	2153.31	-11698.2
132	-7628.47	-484.907	17940	31014.8	10969.8	6004.37	15916.1	-1158.05	11759.6	-4524.87	2115.69	-12287.1
132.5	-7567.28	-1495.72	16621.2	30083	11281.1	5360.74	16292.8	-890.87	11911.4	-4646.31	1645.4	-12639.4
133	-7288.61	-2167.28	15193.8	29161.8	10928.5	5166.14	16863	-461.256	11846.5	-5057.24	809.193	-12654.5
133.5	-7022.86	-2435.75	13786.6	28311.9	10012.1	5312.79	17546.1	33.8401	11757.2	-5616.34	136.326	-12843.6
134	-6823.85	-2773.49	12587.5	27465.9	8613.79	5535.67	18213.4	287.245	11658	-6210.97	-124.299	-13658.7
134.5	-6794.66	-3625.09	11444	26695.1	7044.56	5634.29	18897	227.423	11494.6	-7061.94	-312.075	-15338.3
135	-7085.99	-4648.86	10338	26228.8	6000.85	5507.34	19320.2	49.97	11157.8	-8021.79	-428.212	-17935.4
135.5	-7377.17	-5272.29	9400.04	26046.2	5614.24	5310.86	19416.6	-75.9576	10636.3	-8768.02	-408.767	-20680.9
136	-7038.5	-5443.82	8820.28	25906.6	5482.94	5074.05	19680.6	121.675	9936.86	-9359.55	-503.842	-22319.2
136.5	-6229.01	-5384.74	8683.44	25835.8	5489.55	4596.25	20058.5	404.548	8993.74	-9846.63	-766.714	-22317.3
137	-5453.65	-5257.29	8769.56	26019.1	5801.69	4028.1	20027.6	323.339	8170.21	-10112.4	-998.788	-20828.6
137.5	-4750.6	-5145.21	8959.68	26210.2	6521.06	3611.76	19680.8	257.254	7819.64	-10056.5	-1070.54	-18650
138	-4333.1	-5183.5	9090.66	26109	7406.03	3388.24	19429.3	636.074	7682.31	-9555.01	-1116.38	-17057.5
138.5	-4465.17	-5380.66	9151.33	25795.5	8203.17	3482.07	19405.9	967.37	7574.51	-8455.94	-1341.13	-16768
139	-4973.62	-5587.16	9447.9	25451	8779.86	3661.78	19622.7	827.494	7653.24	-6857.53	-1719.19	-17328.6
139.5	-5348.8	-5734.64	10084.8	25422.8	9033.62	3704.98	19836.6	523.072	7986.38	-5182.28	-1961.64	-17439.3
140	-5280.36	-5901.1	10770.3	25856.8	9171.32	3629.65	19751.8	383.911	8527.91	-3926.25	-1884.35	-16612.8
140.5	-4953.33	-5823.56	11253.5	26403.5	9506.8	3214.58	19465.3	346.998	9153.83	-3148.57	-1520.12	-15450.2
141	-4605.94	-5169.73	11681.2	26830	10029.6	2480.18	19178.5	113.468	9816.27	-2608.63	-1090.35	-14263.4
141.5	-4266.43	-4339.19	12446.8	27206.4	10589.5	1741.26	18857.8	-271.8	10504.9	-2453.85	-830.326	-12415.3
142	-4022.74	-3689.57	13742.4	27641.5	11025.8	1336.76	18459.6	-597.493	11086.9	-2785.52	-660.234	-9386.68
142.5	-4314.04	-2959.3	15362.4	28086.8	11185.3	1159.28	18022.2	-987.595	11217.6	-3402.4	-499.835	-5841.11
143	-5259.8	-1861.79	16795.1	28502.1	11061.2	709.065	17647.3	-1622.88	10742.7	-4291	-199.541	-3026.35
143.5	-6461.16	-562.779	17641	29045	10760.6	0.019531	17335.4	-2413.39	10007.6	-5354.71	389.026	-2037.11
144	-7661.25	479.085	18219.3	29423.9	10352.9	-553.809	16941.7	-3062.23	9070.03	-6215.98	1220.79	-2983.74
144.5	-8775.31	1040.84	18789.8	29226.5	9848.93	-782.806	16614.5	-3578.88	7827.33	-6693.74	2300.62	-4638.74
145	-9701.22	1207.49	19291.3	28800	9438.55	-520.034	16438.4	-4048.52	6563.25	-6893.23	3383.83	-5713.67
145.5	-10260.3	1153.03	19722	28630	9175.54	361.358	16182.1	-4390.62	5762.81	-6838.09	4171.77	-6147.45
146	-10248.4	1028.87	19947.2	28520.3	8887.2	1479.8	15909.8	-4589.63	5542.12	-6393.31	4684.61	-6149.23
146.5	-9619.75	763.521	19831	28064.6	8656.35	2530.38	16036.2	-4499.91	5583.37	-5523.64	4837.64	-5443.4
147	-8556.03	252.411	19120.9	27287.4	8581.3	3551.22	16583.8	-4024.14	5678.38	-4369.77	4376.09	-4197.2
147.5	-7405.84	-258.699	17998.5	26510.5	8544.09	4567.73	17281.2	-3270.14	5384.96	-3067.96	3078.79	-2989.1
148	-6280.94	-821.243	17047	25991.7	8534.97	5418.79	17929.7	-2404.93	4542.41	-1766.38	987.304	-2022.37
148.5	-5077.12	-1828.42	16203.5	25489.6	8614.89	6018.91	18203.7	-1492.43	3705.55	-690.516	-1417.86	-1148.37
149	-4042.66	-3021.32	15101.6	24900.1	8647.35	6584.02	18327.1	-560.743	3278.3	8.68018	-3524.28	-307.009
149.5	-3261.89	-3866.45	13882.9	24524.2	8481.19	7068.41	18645.4	435.787	3542.89	305.507	-5065.71	198.165
150	-2505.47	-4425	12974.2	24278.2	8227.67	7343.93	18746.1	1364.42	4766.8	-9.74951	-6324.04	36.6521
150.5	-1803.86	-5082.67	12366.5	23931.7	8049.69	7450.44	18321.7	2107.46	6798.02	-1139.7	-7064.07	-538.097
151	-1235.4	-5686.22	11680.1	23601.7	7894.24	7373.41	17519.2	2821.79	9030.15	-2814.62	-6318.29	-1256.41
151.5	-710.551	-5852.7	10718.3	23279.8	7827.54	7127.61	16764.4	3195.25	10717.6	-4583.09	-4382.13	-2386.44
152	-210.316	-5898.92	9522.95	22798	8046.15	6705.47	16329.8	3159.14	11335.4	-6103.87	-2562.64	-4020.23
152.5	32.9795	-6112.22	8313.24	22421.1	8282.33	6229.45	16073.3	3026.89	10766	-7349.33	-1419.42	-5634.34
153	-32.4189	-6311.15	7222.87	22387.7	8326.35	5876.61	16075.9	2660.25	9503.65	-8450.52	-1074.87	-6732.39
153.5	-80.7522	-6319.16	6199.28	22654.6	8347.4	5672.72	16364.6	1964.79	8269.59	-9191.03	-1242.78	-7263.51
154	58.5325	-6104.84	5264.7	22988.7	8234.32	5620.07	16754.3	1195.17	7370.19	-9332.48	-1273.16	-7254.84
154.5	252.988	-5886.44	4466.98	22969.5	7772.99	5776.78	17412	808.396	6877.02	-8987.37	-1019.73	-6874.31
155	523.165	-5777.08	4133.36	22547.7	6978.15	5983.82	18442.2	1031.68	6756.02	-8615.68	-626.354	-6267.86
155.5	1043.64	-5655.81	4584.55	21994.2	6040.96	5989.59	19354.6	1755.34	6925.83	-8580.65	-146.346	-5365.89
156	1602.88	-5678.87	5447.81	21517.5	5199.95	5894.82	19789.1	2662.5	7222.93	-8578.56	427.976	-4440.73
156.5	1863.97	-6024.49	6390.69	21123.6	4585.88	6059.82	19972.2	3471.17	7522.73	-8377.78	969.083	-3726.72
157	1802.72	-6272.47	7326.76	20795.8	4164.11	6525.81	19894.7	4237.4	7951.61	-8066.07	1306.31	-3029.81
157.5	1508.72	-5951.4	7812.71	20703	3715.57	6560.38	19299.7	4707.83	8479.32	-7825.88	1501.91	-2273.32
158	1009.37	-5335.56	7506.68	20891.3	3065.21	5797.37	18255.5	4709.94	8987.2	-7817.53	1510.95	-1688.99
158.5	341.604	-4724.29	6664.65	21315.9	2318.05	4802.43	17003	4426.08	9493.96	-7504.41	1385.14	-1543.02
159	-510.317	-4027.04	5793.9	22113.8	1724.7	3958.68	15693.3	3849.83	9967.65	-6311.69	1228.77	-2038.45
159.5	-1527.85	-3469.98	5185.53	23438.5	1432.66	3161.2	14451.5	3131.03	10284.6	-4615.2	926.589	-3159.25
160	-2403.53	-2986.64	4980.26	24964.4	1274.45	2549.95	13434.9	2390.47	10250.4	-3286.13	497.81	-4534.34
160.5	-3015.36	-2147.9	5054.06	26179.4	1035.14	2664.81	12806.5	1680.51	9694.65	-2862.91	-122.9	-5858.91
161	-3529.03	-1045.07	5318.56	26992.3	920.072	3470.54	12680.3	1202.47	8793.67	-3575.69	-924.107	-7012.07
161.5	-3952.56	-45.4727	5821.7	27084.6	1230.98	4405.48	12769.8	915.665	8000.43	-5472.88	-1539.38	-7867.61
162	-4061.24	689.082	6180.83	26184.5	2040.85	5304.94	12563.4	731.406	7460.23	-7943.12	-1790.2	-8125.3
162.5	-3844.25	1244.38	6087.98	24900.4	3207.63	6212.22	12252.4	738.487	7020.36	-9965.87	-1927.96	-7636.39
163	-3613.45	1433.95	5782.72	23726.3	4361.6	7019.67	12510.6	932.122	6696.8	-11178.5	-2211.35	-6735.26
163.5	-3418.69	917.135	5766.96	22657.5	5407.86	7667.76	13274.2	1278.46	6707.64	-11812	-2635.7	-5668.98
164	-3220.58	-236.291	5962.32	21609.5	6482.68	8191.6	14027.9	1800.91	7067.36	-11788.2	-3052.76	-4573.05
164.5	-3023.44	-1732.53	5916.07	20502.3	7355.57	8505.62	14696	2462.77	7569.94	-10742.8	-3384.37	-3501.91
165	-2636.2	-3411.28	5872.59	19421.2	7707.7	8406.97	15256.3	3157.5	8005.66	-8602.77	-3735.33	-2229.22
165.5	-2164.96	-5321	6110.46	18452.7	7583.66	7915.79	15462.8	3916.4	8397.16	-5849.1	-4046	-988.58
166	-2073.51	-7502.29	6367.27	17752.1	7252.09	7086.42	15155.3	4654.99	8915.73	-3133.02	-4060.86	-282.096
166.5	-2380.68	-9798.39	6608.58	17393.7	6756.61	6073.78	14333.6	5205.81	9311.12	-895.027	-3849.5	-21.1409
167	-2615.84	-11846.6	7116.78	17024.2	5959.13	5188.75	13261.1	5543.87	9244.25	527.578	-3650.04	146.041
167.5	-2416.24	-13455.3	7723.96	16395	4954.33	4270.23	12108.6	5477.45	8791.81	843.289	-3363.67	280.036
168	-1939.43	-14733.5	8120.49	15842.9	4023.56	3059.98	10672	5137.53	8084.75	188.589	-2942.33	156.101
168.5	-1639.99	-15775.5	8412.18	15793.6	3321.04	1897.56	9036.81	4880.27	7075.98	-830.254	-2600.22	-244.829
169	-1350.81	-16556	8654.74	16314.2	2918.76	1151.12	7711.64	4647.97	5837.88	-1895.01	-2440.28	-852.197
169.5	-573.323	-17051.7	8811.54	17056.7	2889.86	675.579	7134.71	4374.49	4613.95	-2846.52	-2236.09	-1658.97
170	496.413	-17171.2	8827.3	17642.8	3133.99	329.31	7339.3	4057.03	3672.42	-3575.89	-1611.55	-2486
170.5	1558.73	-16824.4	8815.96	18031.3	3463.57	159.903	7944.26	3679.93	3261.84	-4311.44	-624.899	-3072.83
171	2526.23	-16235.5	9067.65	18112.3	3853.21	239.659	8714.07	3376.47	3282.27	-4942.55	315.627	-3284.36
171.5	2992.61	-15674.6	9341.85	17850	4269.7	513.238	9682.2	2978.83	3499.73	-5288.34	956.043	-3016.6
172	2791.48	-15253.4	9383.75	17582.3	4585.93	634.369	10603.4	2231.57	4245.64	-5549.34	1511.05	-2159.99
172.5	2149.99	-14943.4	9549.35	17576.1	4800.24	453.633	11200	1416.76	5609.23	-5723.45	2125.05	-961.547
173	1375.2	-14722.9	10052.5	17934	4855.71	120.703	11661.4	925.486	6970.12	-5660.4	2459.41	220.538
173.5	719.583	-14580.9	10533.9	18625	4697.72	-449.669	12088.3	922.238	8038.45	-5403.43	2306.18	1161.81
174	312.768	-14348.5	10608.6	19416.5	4528.2	-1501.69	12325.4	1263.49	8899.87	-5233.36	1826.73	1792.93
174.5	-25.2358	-13985	10362.3	20027.1	4500.56	-2973.39	12297.2	1622.35	9547.87	-5357.47	1379.91	2175.1
175	-674.674	-13538.6	10070.8	20345.3	4779.55	-4178.7	11837.5	1995.16	9859.99	-5702.83	1114.7	2317.34
175.5	-1457.99	-12785.6	9791.34	20444.3	5506.38	-4459.62	10880.2	2469.62	9792.57	-6177.37	860.461	2156.05
176	-1988.54	-11553.3	9415.24	20349	6433.37	-3918.78	9756.42	2807	9520.62	-6776.27	506.527	1575.01
176.5	-2107.35	-10109.9	9016.84	19967.1	7363.02	-2890.72	8708.1	2591.01	9125.24	-7444.42	144.193	556.96
177	-1804.11	-8728.44	8798	19205.8	8244.31	-1656.73	7608.44	1706.73	8615.36	-7642.25	-261.376	-721.465
177.5	-1284.67	-7539.73	8642.52	18295.4	8954.45	-272.249	6386.49	570.281	7998.55	-6889.63	-771.964	-1962.58
178	-819.726	-6646.44	8384.69	17706.6	9598.78	1329.81	5262.85	-324.564	7331.39	-5658.74	-983.149	-3013.47
178.5	-459.967	-6123.06	8088.7	17520.5	10090.8	2633.31	4393.53	-933.906	6891.87	-4521.02	-692.902	-3880.61
179	-320.471	-6106.93	7921.19	17448.2	10047.1	3192.12	3566.55	-1552.6	6884.28	-3818.57	-333.037	-4389.17
179.5	-743.759	-6620.56	7867.97	17357.6	9575.31	3173.57	2817.84	-2201.35	7373.76	-3821.35	-101.668	-4354.7
180	-1582.25	-7510.65	7719.12	17224.5	9054.82	2896.75	2493.39	-2574.08	8238.69	-4073.54	129.787	-3903.06
180.5	-2476.85	-8479.16	7423.56	17209.8	8617.15	2582.2	2633.8	-2416.26	9267.23	-3954.02	403.99	-3235.93
181	-3304.67	-9399.88	6958.73	17414.7	8243.55	2191.45	3036.63	-1783.75	10225.2	-3411.22	835.842	-2241.61
181.5	-4129.89	-10246.7	6503.43	17343.8	7895.28	1589.01	3248.24	-903.61	10702.6	-2724.44	1360.76	-851.536
182	-5178.39	-10673.5	6114.79	16797.5	7514.77	667.317	3166.65	-83.2528	10700	-2103.5	1698.81	558.624
182.5	-6316.19	-10579.4	5431.23	16265.7	7018.61	-529.088	3276.23	381.114	10541.2	-1467.04	1769.19	1791.06
183	-7242.07	-10278.7	4746.11	16084.8	6348.84	-1665.35	3528.86	573.455	10180.2	-789.309	1402.27	2986.88
183.5	-7744.64	-9964.72	4518.23	16059.3	6041.43	-2507.22	3604.54	487.152	9580.26	-285.436	489.292	4117.28
184	-7480.83	-9609.83	4407.19	15881.9	6768.3	-3162.2	3392.13	-104.904	8942.56	-203.729	-681.778	5094.13
184.5	-6395.59	-9054.85	4242.15	15834.4	8191.64	-3604.28	2919.83	-1047.65	8388.55	-688.995	-1919.92	5898.99
185	-5208.41	-8460.91	4119.53	16116.2	9453.36	-3769.59	2636.49	-2032.03	7841.67	-1612.84	-3261.18	6302.31
185.5	-4583	-8309.71	4036.99	16267.2	10226.6	-3994.84	2791	-2909.8	7130.43	-2665.32	-4725.34	5944.51
186	-4280.03	-8556.59	4138.95	16094.1	10871.1	-4306.01	3174.35	-3699.36	6192.93	-3562.03	-6035.38	4872.91
186.5	-4076.18	-8874.76	4433.22	15663.5	11451.5	-4377.83	3667.67	-4450.09	5249.86	-4187.69	-6880.97	3466.16
187	-4170.51	-9253.32	4811.52	14954.2	11505.1	-4206.97	4345.68	-4946.56	4856.01	-4770.39	-7496.83	1903.25
187.5	-4523.97	-9622.8	5246.93	14192.5	10962.9	-3939.46	5163.76	-5106.51	5230.82	-5349	-7871.09	427.55
188	-4856.84	-9913.65	5746.81	13614.1	10236.5	-3664.76	5960.17	-4892.36	5967.64	-5479.16	-7146.64	-773.006
188.5	-5066.96	-10153.1	6280.34	13313.5	9511.28	-3420.49	6754.89	-4210.04	6692.34	-5072.03	-5084.69	-1769.73
189	-5240.7	-10255.5	6728.76	13418	8806.45	-3159.32	7591.91	-3644.22	7513.57	-4561.42	-2617.1	-2276.02
189.5	-5321.47	-10285.2	7126.48	14054.4	8254.15	-2619.89	8492.44	-3762.84	8573.87	-4003.73	-534.132	-2148.34
190	-5344.94	-10329.2	7878.1	15195.9	7922.59	-1524.63	9357.69	-4213.69	9534.87	-3188.23	787.724	-1771.55
190.5	-5404.52	-10311	9130.38	16461.7	7737.25	33.2129	9957.21	-4453.52	10142.5	-2239.7	1157.28	-1276.34
191	-5300.32	-9977.77	10351.1	17582	7683.74	1703.31	10226.2	-4422.7	10482.9	-1367.67	858.927	-454.636
191.5	-4787.91	-9128.32	11063.4	18632	7759.71	3250.31	10216.5	-4169.2	10613.5	-693.521	339.601	668.2
192	-3896.53	-8194.93	11195	19403.4	7731.57	4531.69	10059	-3627.25	10436	-309.183	-256.111	1898.09
192.5	-2702.46	-7782.07	10841.9	19733.3	7481.76	5317.45	9841.99	-2991.26	9844.9	-179.73	-764.151	3096.36
193	-1117.87	-7803.14	10348.9	19925.3	7035.86	5579.96	9585.14	-2827.07	8787.21	-169.777	-1068.18	4056.84
193.5	471.583	-7680.59	10075.2	20031.8	6635.85	5459.65	9232.06	-3387.14	7432.51	-464.711	-1289.28	4549.91
194	1509.34	-7343.28	9845.55	19920.6	6447.98	5045.89	8745	-4326.06	6247.65	-1153.79	-1304.78	4526.07
194.5	1923.77	-7278.45	9286.41	19495	6189.98	4450.72	8279.77	-5506.42	5485.99	-1872.8	-961.595	4098.95
195	1917.97	-7541.72	8607.82	18573.1	5916.38	3679.47	8004.29	-6904.65	5095.84	-2487.63	-607.056	3380.63
195.5	1912.44	-7906.81	8207.65	17358.8	6043.36	2886.32	8003.28	-8111.36	5046.68	-2927.52	-477.182	2554.35
196	1981.64	-8516.59	8306.53	16157.2	6563.24	2260.39	8391.85	-8695.4	5348.66	-2976.75	-135.076	1709.25
196.5	1616.85	-9513	8922.19	14986.7	7039.31	1592.82	9302.68	-8697.38	5989.95	-2728.77	550.395	1073
197	619.155	-10418.1	9552.63	13778.8	7186.87	901.217	10584	-8339.28	6973.62	-2365.87	1271.3	953.516
197.5	-706.532	-10658.9	9890.81	12686	7021.66	567.638	11739.2	-7670.59	8317.08	-1932.69	1978	1112.33
198	-1988.85	-10554.9	9915.36	12020.3	6731.33	536.545	12450.4	-6855.35	9980.59	-1435.54	2819.52	1326.89
198.5	-2966.33	-10763.4	9376.99	11553.3	6523.81	528.518	12894.4	-6065.12	11501.7	-962.614	3980.84	1916.84
199	-3408.43	-11091.4	8292.05	11129.6	6257.77	707.045	13180.7	-5329.25	12349.4	-724.592	5387.16	2897.27
199.5	-3183.98	-10967.7	7047.83	11018.2	5766.47	1139.81	12959.9	-4553.14	12500.2	-702.692	6763.18	3956.85
200	-2418.58	-10634.9	5815.79	10992.4	5245.2	1560.11	11985.2	-3748.7	11944.7	-739.38	7706.85	5030.06
200.5	-1241.14	-10614	4428.19	10888.7	4929.34	1846.94	10570.3	-3157.95	10780.7	-822.837	7929.13	5770.91
201	51.9756	-10782.1	2909.86	10987.2	5039.39	1952.41	9196.63	-2734.2	9563.8	-903.375	7434.6	5848.16
201.5	1110.84	-10834	1476.21	11152.8	5573.07	1901.7	7989.26	-2280.07	8465.74	-878.139	6476.21	5586.32
202	1799.57	-10840	339.33	10976.4	6089.3	1838.92	6897.8	-1894.38	7276.23	-785.542	5410.31	5368.3
202.5	2244.6	-10793	-214.699	10692.4	6350.93	1745.96	6121.39	-1593.35	6217.03	-712.075	4281.47	4913.82
203	2549.79	-10611.5	-231.656	10693.5	6526.8	1571.16	5762.56	-1293.93	5509.93	-713.599	3059.08	3737.71
203.5	2327.99	-10428.6	24.1526	10719.6	6515.02	1558.8	5573.91	-1187.11	5110.36	-764.745	1840.69	2286.4
204	1464.22	-10248.3	488.825	10451.8	6130.76	1851.79	5222.17	-1357.39	4996.95	-771.084	828.66	1678.44
204.5	311.436	-10145.8	1204.88	10085.5	5651.75	2315.06	4482.48	-1731.55	5236.69	-753.378	289.379	2099.98
205	-1028.22	-10269.5	2197.91	10110.7	5439.41	2876.69	3788.98	-2428.01	5798.06	-858.326	249.175	2814.68
205.5	-2319.36	-10593	3373.69	10509	5480.85	3476.08	3885.9	-3419.21	6544.34	-1044.2	473.5	3389.27
206	-3221.25	-10853.4	4430.96	11069.7	5493.41	4066.67	4623.5	-4390.88	7395.84	-1129.52	871.441	3567.89
206.5	-4069.96	-10694.6	4947.07	11957	5546.3	4761.73	5358.27	-5072.46	8294.78	-1147.3	1949.92	3219.49
207	-5092.77	-10202.7	4936.36	13261.7	5878.36	5561.71	5967.83	-5535.1	9161.9	-1271.84	3882.23	2834.48
207.5	-5601	-9704.08	4915.64	14857.4	6311.56	6178.03	6643.25	-5895.21	9623.27	-1415.09	5751.8	2969.04
208	-4954.29	-9172.4	4859.31	16308.7	6849.01	6193.51	7339.48	-5998.81	9477.88	-1338.47	6781.92	3630.7
208.5	-3539.98	-8543.29	4400.12	17318.3	7666.07	5542.85	7672.88	-5866.05	8902.67	-1187.87	6586.73	4648.07
209	-2232.07	-7915.84	3793.17	18094	8405.51	4600.98	7411.52	-5839.95	8151.56	-1258.22	5100.15	5839.99
209.5	-1231.75	-7405.13	3501.63	18679.2	8665.57	3478.41	6828.49	-6082.71	7298.91	-1528.64	2894.44	6854.09
210	-280.759	-7079.98	3522	18764.9	8613.7	2148.18	6344.62	-6381.05	6243.23	-1874.3	538.782	7458.88
210.5	341.097	-6885	3608.86	18099.2	8586.93	931.575	6068.23	-6629.83	5634.99	-2308.39	-1624.03	7536.91
211	202.772	-6815.93	3942.23	16890.1	8550.29	175.041	5923.42	-6982.23	6128.84	-2804.14	-3465.03	6833.32
211.5	-427.307	-6911.21	4618.86	15574	8269.27	-186.753	5711.76	-7470.86	7158.58	-3316.75	-5043.04	5383.68
212	-955.077	-7236.03	5206.59	14099.5	7788.47	-199.591	5341.22	-7962.46	7820.67	-3717.29	-6321.93	3683.91
212.5	-1415.42	-7734.62	5606.11	12562	7382.24	222.36	5101.11	-8226.36	7670.7	-3939.33	-7009.77	2071.06
213	-2225.17	-8307.29	5889.16	11497.8	7061.39	889.972	5026.69	-7988.83	6627.04	-4055.14	-6449.59	473.103
213.5	-3257.89	-8867.33	5894.11	10826.7	6526.35	1824.56	5190.89	-7255.63	5006.95	-4029.89	-4440.82	-1136.18
214	-4224.91	-9353.91	5792.05	10179.7	5775.3	3037.38	5919.42	-6251.36	3416.98	-3858.38	-1871.96	-2266
214.5	-4876.07	-10077.5	5812.72	9797.52	5201.34	4203.4	7160.9	-4920.7	2443.86	-3625.54	133.523	-2451.79
215	-5048.35	-10999.6	5646.55	9698.44	5128.44	5342.89	8570.81	-3297.8	2243.86	-3412.19	1189.27	-1746.2
215.5	-4988.23	-11673.3	5009.45	9467.35	5437.54	6356.72	9623.34	-2001.42	2512.78	-3082.63	1659.42	-469.843
216	-4676.05	-12161.7	4120.59	9065.26	5924.04	7031.94	10064	-1317.26	3286.44	-2524.7	1988.08	563.429
216.5	-3946.13	-12672.4	3168.81	8794.92	6563.4	7587.95	10252.6	-916.612	4984.89	-1966.22	2143.85	840.248
217	-2936.54	-13117.6	2074.34	8954.86	7129.58	8013.11	10249.2	-641.655	7425.36	-1529.72	1790.82	905.961
217.5	-1972.34	-13249.6	836.109	9348.1	7648.23	8175.28	9797.82	-492.265	9803.19	-1190.39	890.086	1461.53
218	-1326.54	-13092.7	-383.718	9578.64	8237.97	8035.47	9095.51	-536.372	11415.9	-1078.18	-247.157	2725.1
218.5	-912.848	-12840.2	-1402.32	9582.99	8668.57	7764.16	8423.17	-980.147	11809.9	-1175.21	-1171.64	4408.76
219	-815.339	-12487.4	-1994.92	9527.23	8762.29	7698.57	7878.42	-1614.47	10850.8	-1494.02	-1960.91	6026.23
219.5	-1277.39	-12227.2	-2081.67	9439.61	8385.21	7959.86	7384.56	-2032.31	9124.68	-2288.71	-2778.97	7145.14
220	-1953.4	-12210.9	-1954.97	9221.85	7610.6	8624.35	6994.85	-2294.73	7546.1	-3389.55	-2883.59	7427.71
220.5	-2503.86	-12292.4	-1839.18	9049.14	6888.52	9414.14	7080.19	-2502.44	6222.37	-4439.19	-1837.43	6827.73
221	-3169.09	-12275.8	-1437.99	9067.39	6431.74	9873.33	7643.74	-2687.04	4880.62	-5260.97	-163.108	5543.02
221.5	-3946.01	-12179.4	-555.617	9013	6107.27	10195.5	8306.97	-2806.81	3719.15	-5733.5	1468.56	3731.35
222	-4537.67	-12218.9	388.312	8654.59	6049.81	10614.3	8895.59	-2715.84	2852.15	-5851.87	2545.77	1568.49
222.5	-5054.51	-12389.4	1033.86	8286.1	6309.59	10940.3	9483.52	-2563.89	2104.58	-5506.05	2927.59	-719.307
223	-5762.44	-12467.6	1524.87	8155.47	6503.13	11159.1	10050.4	-2541.5	1630.15	-4804.44	2943.42	-2797.44
223.5	-6585.48	-12290	2040.62	8244.26	6420.27	11312.7	10460.7	-2613.94	1676.63	-3875.04	2997.44	-4252.63
224	-7160.27	-12005.6	2451.32	8479.76	6401.94	11464.8	10537.8	-2634.97	1929.27	-2658.71	3229.42	-4989.82
224.5	-7221.44	-11727.1	2747.63	8688.91	6768.01	11699	10238.7	-2663.22	2452.61	-1338.26	3564.48	-4942.4
225	-6957.2	-11236.8	2972.38	8799.1	7195.19	11759.1	9663.91	-2906.54	3853.11	-107.666	3754.29	-3527.88
225.5	-6517.39	-10483.5	3015.44	8780.95	7327.94	11378.8	8653.85	-3266.38	5896.59	927.135	3425.08	-475.682
226	-5943.95	-9707.25	2868.82	8626.95	7167.6	10738.2	7202.97	-3695.93	7883.53	1630.52	2665.51	3352.38
226.5	-5388.91	-9017.77	2607.14	8364.95	6854.74	10054.5	5755.08	-4370.22	9171.54	1908.07	1790.53	6876.55
227	-4648.94	-8500.23	2518.15	8002.4	6673.32	9395.1	4865.87	-5046.52	9178.68	1870.56	774.259	9351.53
227.5	-3743.91	-8338.61	2435.72	7603.23	6797.78	8890.4	4878.09	-5381.02	8168.39	1559.23	-275.835	10356.9
228	-3136.93	-8514.98	1974.18	7307.23	7165.65	8521.65	5260.76	-5485.3	6739.66	793.675	-1262.06	9957.78
228.5	-2962.47	-8941.17	1562.03	7182.81	7627.12	8208.89	5199.8	-5617.24	5042.01	-351.911	-2114.29	8663.01
229	-3128.59	-9622.7	1432.4	7149.39	8041.34	7922.17	4782.91	-5812.34	3162.92	-1484.43	-2651.83	7206.45
229.5	-3520.11	-10353.1	1326.03	7224.05	8385.91	7737.75	4431.63	-5957.38	1454.67	-2319.58	-2836.89	5830.66
230	-4013.69	-10791.1	1199.38	7519.78	8743.08	7784.36	4067.33	-6088.72	321.669	-2755.55	-2500.92	4395.52
230.5	-4621.33	-11169.9	1088.38	7936.5	9115.54	7778.91	3457.72	-6192.75	-164.433	-2787.68	-1583.99	2969.85
231	-5235.56	-11884.8	1006.44	8214.07	9498.52	7649.55	2770.74	-5989.25	-39.5859	-2644.64	-441.849	1816.4
231.5	-5720.63	-12779.9	973.774	8268.27	9867.7	7822.72	2375.68	-5022.58	962.252	-2480.65	715.676	1234.85
232	-6015.08	-13557.9	795.292	8277.13	10129.6	8269.96	2458.15	-3245.12	3220.13	-2149.42	2120.25	1218.08
232.5	-5844.88	-13975.8	205.262	8304.25	10301.9	8650.01	3048.22	-1434.91	6476.15	-1620.25	3768.34	1523.53
233	-5107.69	-13973.2	-505.379	8203.03	10328.7	8678.38	4088.3	-157.536	9797.04	-1042.85	5160.91	2244.04
233.5	-4119.81	-13540.6	-1076.3	7984.06	10107	8257.38	5173.82	705.546	12297.9	-510.498	5879.8	3507.54
234	-3178.13	-12667	-1606.65	7833.51	9569.4	7725.2	5541.26	1241.66	13549	-39.9233	5919.7	5038.45
234.5	-2355.08	-11762.8	-2032.19	7869.19	8927.43	7232.84	5030.72	1364.05	13701	252.798	5396.07	6625
235	-1731.73	-11312	-2357	8041.95	8661.81	6521	4560.01	960.276	13287.5	303.893	4235.53	8157.64
235.5	-1477.5	-11255.5	-2613.45	8163.58	8911.12	5742.47	4658.27	78.3077	12642.6	377.024	2565.51	9298.77
236	-1743.8	-11104.2	-2787.55	8048.67	9374.02	5402.5	4752.62	-962.259	11624.2	513.964	788.896	9782.44
236.5	-2532.3	-10789.6	-2922.37	7902.39	9508.09	5569.27	4414.1	-1796.17	10345.1	522.206	-1139.34	9748.86
237	-3508.84	-10677.9	-3257.71	8022.63	9294.57	5922.47	3855.41	-2309.67	9291.08	519.652	-3303.73	9469.5
237.5	-4299.52	-10744.4	-3853.75	8213.86	9043.78	6362.93	3456.35	-2653.98	8525.51	333.11	-5087.44	9055.03
238	-5062.27	-10766.4	-4173.09	8121.3	8744.33	6926.94	3321.77	-3055.02	7762.9	-191.385	-6226.42	8551.77
238.5	-6030.89	-10897.5	-4052.51	7714.43	8449.58	7524.25	3196.32	-3499.87	6850.58	-600.445	-6814.1	8051.72
239	-6806.37	-11231.3	-3934.74	7423.4	8310.82	8103.44	2972.77	-3638.17	6026.81	-721.723	-6231.92	7487.18
239.5	-6934.66	-11764.6	-3898.29	7504.13	8443.82	8518.73	2896.25	-3383.91	5613.57	-649.563	-4088.94	6708.66
240	-6638.15	-12655.2	-3676.3	7836.3	8787.76	8744.67	2885.92	-3055.07	5601.33	-425.032	-894.674	5899.48
240.5	-6304.74	-13631.9	-3350.74	8399.02	9135.41	8935.15	2573.65	-2951.86	6043.76	-36.2024	2507.59	5235.17
241	-5630.82	-14222.4	-3107.49	9085.91	9352.99	8985.71	1740.43	-3041.81	6886.59	542.404	5133.4	4839.9
241.5	-4338.46	-14188.6	-2792.94	9787.05	9426.3	8749.6	639.856	-2970.16	7699.18	1168.38	6523.93	4988.29
242	-3058.34	-13544.6	-2291.28	10626	9379.35	8342.56	110.646	-2664.08	8408.47	1795.01	6897.95	5664.65
242.5	-2463.88	-12577.5	-1650.33	11739	9090.75	7932.99	482.054	-2270.38	9042.65	2349.84	6499.28	6527.23
243	-2392.75	-11529.4	-960.737	12860.1	8440.95	7369.15	1176.3	-1777.47	9207.48	2521.33	5727.02	7309.64
243.5	-2295.14	-10388.5	-252.471	13476.9	7670.83	6641.65	1719.92	-1283.59	8646.05	2309.86	4948.66	7924.07
244	-2175.52	-9433.37	410.281	13455.2	7134.55	6041.3	2356.17	-835.914	7413.04	2000.99	4022.54	8380.47
244.5	-2441.94	-9139.63	910.469	13008.2	7160.85	5727.93	3328.71	-284.489	5825.16	1710.8	2776.75	8649.06
245	-3169.18	-9300.84	1364.21	12342.2	7735.32	5998.52	4361.41	264.622	4268.23	1467.56	1496.99	8522.16
245.5	-4208.29	-9584.19	1747.37	11441.9	8176.51	6910.11	5099.16	677.753	2780.88	1237.36	386.767	8037.42
246	-5131.85	-9984.04	1851.78	10428.1	8209.6	8226	5664.23	872.418	1438.1	991.275	-555.706	7281.47
246.5	-5634.34	-10504.9	1760.83	9588.5	8260.02	9679.9	6272.11	800.834	737.813	753.967	-1253.06	6282.25
247	-5942.66	-11000.1	1653.24	8785.67	8495.33	10855.8	6799.53	802.42	1118.32	712.404	-1561.29	5364.67
247.5	-6121.73	-11401.2	1556.33	7970.59	8591.21	11804.3	7208.44	866.971	2476.9	963.118	-1208.6	4789.17
248	-6086.93	-11725.3	1548.2	7550.18	8373.88	12567.5	7371.66	725.252	4418.33	1343.07	-261.713	4626.59
248.5	-5686.03	-11814.2	1624.21	7587.98	7995.49	12664.7	7242.93	549.227	6444.82	1878.34	946.88	4830.49
249	-4825.98	-11675.4	1437.38	7614.04	7537	12076.8	6939.22	442.19	8055.57	2464.54	2370.88	5281.95
249.5	-3712.94	-11378.5	695.973	7426.33	6944.85	11245.5	6306.68	276.071	9259.78	2831.07	3942.87	5738.88
250	-2732.27	-10834.6	-515.697	7407.37	6485.63	10283.7	5501.15	-34.6982	10305.2	3126.92	5334.91	6182.97
250.5	-2305.08	-10129.4	-1783.78	7568.48	6357.06	9045.68	4754.28	-479.693	11137.1	3503.66	6254.18	6839
251	-2242.57	-9765.32	-2738.14	7325.06	6272.97	7853.38	3888.27	-1100.29	11642.2	3860.65	6678.11	7564.53
251.5	-2364.96	-9963.88	-3525.67	6708.3	6190.58	7320.53	3035.74	-1874.07	11721.5	4077.04	6688.68	8024.48
252	-3033.26	-10357.3	-4091.33	6018.55	6220.13	7338.89	2408.99	-2721.08	11257.9	4053.76	6234.85	8006.87
252.5	-4017.19	-10619.2	-4113	5086.39	6373.62	7387.41	1885.78	-3647.43	10447	3851.48	5383.45	7691.71
253	-4784.67	-10812	-3798.91	3986.72	6641.14	7426.06	1551.55	-4480.38	9406.3	3612.86	4282.88	7356.45
253.5	-5391.11	-11162.7	-3466.08	3081.65	7159.6	7751.22	1659.03	-5006.5	7920.64	3386.71	3096.68	6880.28
254	-5977.09	-11535.9	-3141.29	2593.87	7952.6	8423.87	2011.85	-5149.01	6181.46	3126.48	1985.61	6141.82
254.5	-6398.5	-11740.1	-2699.36	2325.45	8763.33	9154.76	2147.68	-4991.36	4730.53	2755.13	978.091	5308.28
255	-6471.47	-11899.8	-2342.04	2062.94	9721.6	9807.72	2115.04	-4667.69	3762.65	2273.71	382.717	4686.3
255.5	-6215.62	-12138.9	-2515.02	2138.56	11042.7	10424.4	2219.14	-4287.45	3073.21	1790.32	540.016	4222.7
256	-5909.35	-12402.6	-3041.95	2799.14	12530.9	10787.8	2556.45	-4071.86	2815.47	1429.82	1441.8	3625.72
256.5	-5723.95	-12607.4	-3305.83	3715.16	13674.4	10899.2	3198.33	-4056.26	3629.53	1213.73	2790.46	3140.15
257	-5478.7	-12708.3	-3249.22	4502.07	13961.4	10975.6	3885.42	-4063.51	5550.31	955.114	4225.52	3157.61
257.5	-5045.51	-12726	-3355.82	5210.65	13723.7	11009.1	4234.88	-3971.63	7900.44	503.008	5771.89	3725.63
258	-4598.78	-12680.1	-3749.57	5912.12	13727.3	11056.5	4412.99	-3786.83	9997.23	-47.6729	7410.23	4818.98
258.5	-4097.28	-12412.6	-4153.94	6408.3	13667.8	11165.9	4729.59	-3660.5	11310.5	-442.159	8721.47	6051.71
259	-3377.25	-11875.2	-4476.13	6597.43	12930.4	11310.7	5240.96	-3640.78	11799	-779.769	9277.41	6959.86
259.5	-2740.96	-11292	-4754.32	6634.68	11930.4	11428.1	5838.56	-3650.69	11894.4	-1440.2	9038.84	7427.37
260	-2455.57	-10755.4	-5065	6559.12	11218.4	11302.5	6332.74	-3517.67	11891.3	-2042.63	8252.14	7417.68
260.5	-2440.18	-10147	-5458.07	6217.11	10732.3	10906.3	6636.23	-3156.51	11761.4	-1729.28	7235.88	6983.09
261	-2751.75	-9493.3	-5733.86	5611.67	10315.3	10641.3	6695.51	-2711.68	11420	-395.789	6207.5	6127.77
261.5	-3263.64	-9005.58	-5797.14	5042.38	9976.04	10814.4	6526.33	-2227.06	11084.4	1198.93	5209.73	4934.85
262	-3651.4	-8779.62	-5869.78	4457.67	9731.79	11154.1	6188.86	-1659.24	10819.6	2223.75	4408.46	3729.58
262.5	-3966.5	-8757.29	-6088.28	3599.74	9639.98	11171.4	5820.34	-1117.65	10407.8	2253.05	3910.86	2617.59
263	-4114.07	-8948.18	-6304.81	2803.37	9587.54	10709	5697.62	-750.447	9987.92	1525.24	3779.4	1539.18
263.5	-3931.61	-9407.64	-6343.08	2382.65	9318.2	10109.8	5747.85	-367.401	9715.73	545.245	4033.92	763.72
264	-3699.78	-10090.9	-6163.21	2179.2	9072.37	9720.74	5817.37	174.81	9532.12	-323.597	4463.98	534.914
264.5	-3553.8	-10903	-5920.26	2013.14	9108.49	9358.28	5912.23	600.547	9302.6	-816.584	5018.8	847.542
265	-3253.32	-11633.6	-5828.58	1990.82	8923.3	8920.81	5872.67	657.859	8945.23	-973.443	5766.5	1694.13
265.5	-2912.35	-12017.3	-5763.57	2197.82	8102.4	8540.69	5816.11	431.406	8623.4	-856.922	6812.1	2999.26
266	-2834.41	-12111.8	-5516.86	2750.14	7064.13	8223.66	6076.26	188.095	8301.69	-531.893	8167.24	4595.08
266.5	-2894.95	-12101	-5091.33	3504.34	6302.87	8099.27	6515.87	33.5481	7902.63	-279.468	9474.3	6380.39
267	-3168.96	-11840.4	-4573.13	3979.9	5737.29	8235.15	6954.89	-124.767	7741.56	-110.982	10412.8	8264
267.5	-3871.58	-11084.2	-3892.13	4202.05	5284.27	8491.02	7429.45	-532.52	7763.21	199.04	10896.3	9850.9
268	-4651.97	-9984.25	-2977.16	4220.41	5247.93	8795.53	7589.12	-1330.18	7647.82	669.575	10998	10750.7
268.5	-4920.73	-8959.41	-2260.38	3840.88	5777.06	9205.42	7237.68	-2343.45	7560.21	1280.88	10783.8	10934.9
269	-4491.79	-8269.61	-1926.32	3136.91	6648.02	9730.39	6709.14	-3301.76	7564.2	1750.82	10135.2	10443.5
269.5	-3749.29	-7766.06	-1571.41	2218.02	7477.04	10250.7	6221.5	-4065.72	7634.12	1828.55	9068.18	9343.02
270	-3048.85	-7170.74	-1166.15	1264.61	7970.87	10850.6	5602.71	-4698.6	7800.16	1727.99	7796.54	7886.81
270.5	-2412.96	-6588.24	-815.516	502.723	8300.6	11704.4	4674.89	-5450.91	7949.03	1670.32	6557.67	6307.01
271	-1884.76	-6310.93	-501.472	-212.83	8750.18	12596	3740.4	-6253.05	8151.06	1925.29	5704.23	4757.15
271.5	-1455.18	-6545.71	-336.255	-991.792	9336.67	13219	2942.57	-6565.48	8492.79	2528.8	5232.95	3325.91
272	-1105.45	-7170.49	-184.368	-1563.52	10132.3	13521.9	2216.15	-6229.73	9105.36	2954.28	4970.47	2054.77
272.5	-1038.84	-7816.72	-3.12134	-1618.47	11101.6	13583.9	1845.79	-5488.46	9878.63	2782.44	5179.27	1193.6
273	-1488.23	-8451.99	29.6541	-1015.78	12009.8	13568.5	1765.82	-4762.04	10188.2	2255.49	5852.27	812.431
273.5	-2291.41	-9108.65	-17.9724	19.1096	12628.7	13585.7	1775.43	-4295.43	9845.85	1727.23	6562.29	796.305
274	-2966.47	-9466.88	28.1396	1028.39	12651.1	13319.7	2094	-3790.18	9327.51	1004.84	7142.61	1197.13
274.5	-3235.8	-9385.64	294.863	1876.19	12270.1	12648.4	2767.18	-3281.56	8894.59	118.543	7618.42	1946.69
275	-3123.55	-9026.86	708.423	2908.66	11851.5	12004.5	3729.21	-3166.79	8210.81	-539.211	7778.51	2954.73
275.5	-2895.7	-8440.52	966.371	4070.39	11273.6	11462.7	4796.36	-3553.29	7126.75	-960.18	7384.01	4087.17
276	-2948.5	-7679.67	1054.65	4760.51	10732.4	10772.5	5564.52	-4243.2	5944.61	-1221.15	6640.13	5151.92
276.5	-3447.32	-6882.84	1109.28	4912.52	10505.8	9976.06	5968.3	-4813.86	4895.59	-1165.74	5892.07	5896.73
277	-4084.94	-6097.33	1081.55	4818.32	10603.4	9308.47	6151.4	-5281.27	4293.38	-593.257	5178.01	6162.65
277.5	-4501.84	-5383.11	1023.21	4462.33	10924.4	8828.83	6057.61	-6044.73	4217.44	234.47	4393.23	6163.77
278	-4867.58	-4934.54	986.189	3645.18	11199.9	8510.02	5577.95	-6904	4322.8	785.005	3889.52	5895.71
278.5	-5439.93	-4848.61	815.591	2380.93	11324.6	8371.32	4847.31	-7434.15	4566.02	531.452	4206.82	5163.81
279	-5942.56	-5060.95	419.834	840.804	11547.1	8516.36	4072.09	-7680.74	5299.76	-1218.49	4941.89	4204.1
279.5	-6182.63	-5536.88	-53.3762	-597.61	12077.3	9144.29	3384.16	-7783.81	6617.89	-4035.35	5153.81	3203.94
280	-6354.87	-6178.32	-683.617	-1361.59	12458.8	10015.3	2927.28	-7789.31	8029.33	-6728.35	4358.85	1975.46
280.5	-6296.08	-6809.38	-1615.26	-1404.24	12321.1	10549.1	2742.8	-7779.56	9199.71	-9076.81	2869.96	662.324
281	-5822.02	-7253.14	-2670.55	-1106.61	12086.3	10701.6	2669.75	-7738.53	10290	-10642.9	1594.53	-587.57
281.5	-5227.92	-7340.75	-3573.81	-599.891	12014	10699	2530.37	-7729.43	11342.9	-10644.6	985.148	-1952.41
282	-4727.62	-7134.62	-4056.64	81.5337	11983.7	10442.4	2389.42	-7825.02	12152	-9232.82	1016.11	-3071.62
282.5	-4450.29	-6689.02	-4177.13	874.531	12103	9946.56	2446.8	-7915.07	12402.5	-7016.28	1996.98	-3500.76
283	-4450.03	-6085.87	-4189.03	1623.98	12414.7	9480.05	2829.26	-7951.6	11959.2	-4883.45	4114.2	-3404.62
283.5	-4503.21	-5605.21	-4088.99	1824.2	12606	9059.66	3357.65	-7952.86	11000.3	-3386	6824.98	-2945.38
284	-4433.83	-5378.95	-3782.32	1487.06	12389.1	8697.46	3604.19	-7967.12	9805.3	-1935.85	9234.87	-2258.29
284.5	-4126.93	-5506.46	-3307.75	1230.08	11995.3	8739.36	3497.96	-8173.33	8430.52	-92.3218	10413.4	-1010.22
285	-3682.12	-5852.61	-2866.74	944.185	11788.5	9023.36	3258.68	-8720.44	6830.24	1820.96	9822.1	1347.83
285.5	-3364.79	-6145.83	-2583.01	304.379	11659.7	9174.48	2937.19	-9310.52	5185.05	3358.28	7945.41	4032.63
286	-3130.07	-6421.46	-2352.47	-321.712	11319.4	9479.46	2544.99	-9508.88	3583.84	3980.3	5794.86	5920.65
286.5	-3014.69	-6740.88	-2162.46	-691.484	10683.7	10060.2	2018.36	-9499.44	2050.08	3589.47	3841.38	6696.42
287	-3148.11	-7037.95	-2188.55	-921.071	10172.3	10635.4	1355.78	-9497.28	783.595	2743.28	1916.19	6489.27
287.5	-3327.65	-7408.05	-2417.57	-774.846	10027.1	11132.5	701.731	-9190.9	87.0298	1868.01	222.93	5911.26
288	-3429.39	-8032.68	-2487.37	-119.214	10084.3	11408.4	31.3422	-8564.16	130.331	1136.41	-285.096	5359.38
288.5	-3465.38	-8801.75	-2235.08	599.78	10497.8	11511.6	-734.389	-7845.72	939.592	772.485	685.085	4705.56
289	-3410.36	-9344.54	-1898.19	1204	11104.1	11872.7	-1280.35	-7117.46	2410.73	807.303	2386.72	4148.06
289.5	-3256.93	-9464.25	-1696.15	1828	11457.2	12414.8	-1140.83	-6320.7	4363.95	925.568	4101.85	3914.65
290	-2993.94	-9223.28	-1579.26	2494.06	11720.3	12759.5	-336.148	-5340.31	6845.74	1002.7	5241	3824.53
290.5	-2845.42	-8832.51	-1325.13	3470.91	12255.2	12770.2	698.098	-4461.73	9483.27	1249.82	5837.31	3826.29
291	-2866.68	-8600.26	-884.405	4642.05	12836.7	12501.6	1447.97	-3943.17	11469.8	1758.94	6467.59	3859.72
291.5	-2704.54	-8501.87	-489.795	5091.41	12842.8	12044.2	1897.99	-3719.05	12361.8	2304.75	7230.96	3760.46
292	-2320.83	-8441.04	-317.565	4690.18	12334	11411.5	2474.9	-3712.31	12113	2699.73	8080.02	3729.19
292.5	-1852.2	-8196.58	-130.216	4057.9	11922.9	10778.3	3059.6	-3943.55	11102.8	3060.86	8969.74	3915.39
293	-1141.3	-7614.24	168.544	3201.44	11732	10312.6	3175.88	-4304.21	9769.82	3442.19	9648.56	4264.07
293.5	-313.655	-7156.68	287.021	2325.15	11694.2	10099	2747.7	-4560.23	8376.53	3824	9933.57	4729.66
294	-7.58179	-6935.6	84.8066	1988.13	11619.6	10334.9	2180.04	-4761.14	7165.8	4160.75	9747.93	5042.78
294.5	-300.893	-6765.14	-394.844	1933.68	11355.8	10747.6	1696.55	-4934.05	6206.73	4217.53	9135.18	5081.81
295	-600.583	-6625.33	-995.014	1699.38	11298.2	10978.1	1206.11	-4829.08	5430.76	3887.01	8324.2	5054.1
295.5	-664.035	-6357.44	-1591.73	1543.32	11553.6	11225.1	1118.56	-4337.33	4896.5	3447.97	7302.59	5042.44
296	-804.551	-6170.03	-2330.51	1751.65	11834.5	11449.3	1543.97	-3811.11	4772.56	3261.03	6038.69	4790.88
296.5	-1214.7	-6299.13	-3266.01	2069.49	11999.2	11400.5	1896.5	-3546.12	5004.79	3340.84	5012.19	4281.23
297	-1455.9	-6438.19	-4022.8	2283.99	11844.6	11221.2	2199.85	-3307.5	5458.28	3516.21	4322.88	3801.64
297.5	-1321.51	-6359.41	-4355.83	2452.46	11299.2	11129.8	2722.65	-2953.83	6295.97	3731.34	3781.68	3343.27
298	-1174.79	-6204.68	-4680.71	2669.27	10787.9	11131.5	3208.2	-2742.41	7404.73	3842.24	3742.92	2919.34
298.5	-1226.63	-6187.73	-5313.96	2955.08	10702.4	11167	3451.28	-2792.23	8378.85	3649.16	4323.52	2628.97
299	-1418.98	-6187.56	-5913.29	3315.84	10887.3	11209.7	3349.16	-3016.83	9281.53	3506.68	5227.07	2407.5

## Sheet: Fig.10b
Figure 10
Figure 10B (left)
	a-wave
	WT							G369i KI					CaV1.4 KO
	Amplitude (µV)							Amplitude (µV)					Amplitude (µV)
Light intensity (log cd s/m2)	n1	n2	n3	n4	n5	n6	n7	n1	n2	n3	n4	n5	n1	n2	n3	n4	n5	n6
-0.52	-14.09	-5.063	-9.098	-1.0035	-2.64	-5.185	-2.0235	-2.2335	-0.312	-5.8815	-3.4	-4.3305	-10.59	-3.8235	-3.887	-12.595	-4.834	-6.1805
0	0.5005	-9.618	-8.8875	-6.1265	-3.078	-6.977	-1.851	-8.4305	-13.045	-1.2495	-6.0475	-4.231	-9.7925	-5.3685	-5.1005	-14.675	-7.164	-6.5605
0.48	-6.3195	-8.3525	-10.319	-9.2155	-6.186	-1.9915	-8.281	-2.2445	-5.685	-6.2105	-5.256	-3.852	-10.162	-3.0475	-2.391	-5.046	-6.4775	-5.5435
1	-15.225	-8.224	-12.993	-5.1745	-5.2815	-7.226	-11.475	-12.08	-6.7025	-7.9465	-5.836	-15.605	-12.5375	-2.385	-4.866	-3.709	-16.1415	-4.933
1.48	-20.68	-12.31	-12.492	-5.8605	-11.36	-9.8425	-16.835	-5.6305	-9.588	-5.8385	-9.574	-7.3745	-10.5805	-7.174	-10.4165	-5.55	-2.808	-1.15
2	-18.73	-6.893	-16.82	-12.825	-14.848	-10.686	-27.635	-10.271	-10.948	-6.6675	-12.474	-17.741	-10.9955	-5.7395	-4.476	-6.657	-2.845	-7.1735
2.3	-23.925	-11.744	-17.235	-17.785	-21.97	-13.735	-36.435	-16.19	-17.6	-14.155	-18.285	-19.47	-13.6105	-5.0895	-12.445	-5.041	-17.305	-13.586
2.6	-33.925	-20.47	-27.185	-26.705	-30.365	-24.27		-30.635	-20.35	-16.005	-29.03	-24.45	-16.6365	-8.4755	-7.828	-11.013	-13.57	-16.6895
Figure 10B (right)
	b-wave
	WT							G369i KI					CaV1.4 KO
	Amplitude (µV)							Amplitude (µV)					Amplitude (µV)
Light intensity (log cd s/m2)	n1	n2	n3	n4	n5	n6	n7	n1	n2	n3	n4	n5	n1	n2	n3	n4	n5	n6
-0.52	17.615	9.6765	19.045	9.8585	11.605	13.664	11.405	12.563	10.822	10.713	11.76	8.685	16.38	10.7865	13.78	10.5245	14.375	11.52
0	25.59	18.78	28.76	19.93	23.24	21.035	24.945	10.832	8.642	9.687	11.64	10.031	16.505	5.6715	11.22	10.823	14.27	9.9015
0.48	69.34	66.18	65.64	64.05	58.67	55.935	78.175	14.295	5.995	16.305	9.5305	12.385	9.852	7.485	10.887	11.456	10.2215	10.181
1	94.525	78.655	78.29	72.455	79.08	69.605	101.61	7.489	15.695	16.985	17.1	18.935	13.125	7.4905	8.2045	13.793	16.795	12.2295
1.48	111.63	71.855	79.1	73.8	85.27	78.285	108.58	16.411	9.6775	15.82	18.8	31.635	12.905	11.7035	14.225	14.67	9.38	12.92
2	117.69	82.46	78.075	77.295	84.62	77.775	119.2	36.225	22.185	17.24	12.79	20.2	13.654	10.2795	14.75	10.574	9.4215	19.26
2.3	124.93	84.275	88.525	80.97	94.97	82.82	129.65	19.597	27.36	31.275	24.915	26.54	17.24	8.364	12.257	16.375	12.1425	19.5
2.6	137.23	91.94	82.72	87.915	99.04	86.185		53.32	27.435	25.025	22.435	42.005	19.54	9.4655	20.49	14.357	14.8455	32.58

## Sheet: Fig.10c
Figure 10
Figure 10C
	WT				G369i KI				CaV1.4 KO
Light intensity (log cd•s/m2)	-3	-2	0	1	-3	-2	0	1	-3	-2	0	1
Time (ms)	Potential (µV)				Potential (µV)				Potential (µV)
0	-556.174	5799.2	2590.5	7366.25	483.853	-76.3724	787.65	-22.7629	-936.181	-303.66	-734.123	557.821
0.5	-828.447	4910.5	1926.98	6686.69	379.789	22.9636	702.543	-304.381	-726.405	-657.11	-604.23	360.966
1	-953.671	4196.88	1285.21	5462.28	199.346	99.7291	728.113	-975.37	-436.291	-1057.08	-483.232	-261.609
1.5	-942.128	3643.47	873.695	4312.77	-5.93103	155.168	815.085	-1298.88	-66.6788	-1375.52	-354.637	-696.333
2	-894.66	3182.73	686.785	3553.84	-172.869	189.936	893.997	-953.54	280.174	-1460.42	-325.769	-706.496
2.5	-817.32	2817.45	415.902	2955.47	-283.597	179.53	860.135	-404.722	500.584	-1227.46	-417.622	-664.129
3	-674.926	2518.48	116.914	2229.91	-336.745	107.23	726.504	82.9537	592.939	-857.951	-466.42	-835.148
3.5	-601.519	2253.59	-65.125	1327.14	-376.099	-24.6836	537.203	500.869	611.913	-562.81	-475.924	-1223.82
4	-643.256	2003.66	-206.148	424.328	-443.888	-178.163	331.639	784.957	635.092	-343.945	-481.8	-1596.59
4.5	-631.681	1731.43	-405.008	-441.342	-526.33	-302.383	133.269	876.75	669.749	-194.859	-397.586	-1712.36
5	-522.02	1341.44	-626.125	-1324.55	-593.083	-356.595	-51.8311	860.711	612.291	-80.2157	-164.158	-1496.77
5.5	-359.873	767.082	-794.473	-2155.9	-581.146	-341.621	-234.229	815.722	464.047	77.6754	127.55	-973.005
6	-137.934	-3.0625	-974.238	-2832.06	-464.224	-300.594	-409.298	760.928	356.027	277.206	391.363	-252.501
6.5	125.624	-968.508	-1148.33	-3347.8	-269.792	-266.351	-558.178	674.475	244.587	470.488	600.963	487.981
7	449.244	-2031.42	-1178.78	-3726.57	-21.9714	-195.25	-669.217	526.81	-0.08792	666.381	717.816	1124.89
7.5	812.435	-3223.8	-1055.09	-3998.3	262.425	-65.7884	-771.922	311.502	-309.787	901.453	719.139	1580.2
8	1115.24	-4632.14	-846.574	-4147.87	545.717	56.0467	-897.335	31.0439	-522.859	1194.18	652.407	1797.37
8.5	1416.77	-6208.65	-563.613	-4169.06	713.598	182.382	-965.298	-306.154	-605.726	1479.03	614.089	1759.68
9	1935.25	-8018.36	-187.949	-4139.26	741.207	399.976	-950.441	-725.531	-654.674	1588.82	585.842	1528.86
9.5	2701.46	-10081.6	151.016	-4027.52	744.475	712.812	-1004.04	-1227.63	-717.414	1466.83	494.978	1224.51
10	3590.64	-12261.1	304.492	-3784.5	781.357	1049.83	-1158.01	-1806.79	-734.738	1224.75	370.832	932.798
10.5	4601.06	-14542.9	243.938	-3498.88	807.059	1323.21	-1352.99	-2471.03	-687.195	951.888	276.266	643.626
11	5704.19	-16965.4	1.73047	-3300.39	761.999	1486.11	-1611.81	-3126.38	-568.789	698.809	271.949	274.274
11.5	6838.85	-19480.6	-369.727	-3154.65	674.834	1604.22	-1921.79	-3694.17	-258.704	564.312	355.38	-174.42
12	7982.22	-22113.2	-861.93	-2974.13	633.325	1673.67	-2252.65	-4166.71	231.642	560.015	420.597	-557.33
12.5	8939.19	-24958.1	-1482.33	-2890.52	682.034	1621.91	-2577.94	-4506.86	690.71	665.821	442.244	-784.476
13	9570.28	-28013.7	-2191.79	-2949.05	804.212	1564.51	-2851.08	-4703.97	970.656	874.207	515.314	-860.252
13.5	10006.1	-31174.8	-2899.1	-2991.83	900.397	1580.15	-3087.11	-4845.38	1074.14	1073.64	612.693	-801.222
14	10370.3	-34363.1	-3573.17	-2993.41	904.934	1620.76	-3317.85	-5040.2	1113.6	1263.23	645.602	-716.771
14.5	10604.1	-37560.2	-4254.87	-3069.55	873.172	1746.51	-3517.37	-5250.83	1082.95	1577.75	562.988	-676.506
15	10635	-40707.5	-4942.93	-3318.92	813.526	1961.34	-3680.87	-5416.59	923.766	2035.24	390.627	-580.37
15.5	10580.3	-43820.7	-5590.34	-3680.16	686.953	2111.55	-3821.87	-5603.78	690.039	2531.34	227.829	-337.748
16	10540.1	-46947.5	-6135.04	-3997.63	516.333	2123.99	-3912.37	-5838.91	418.751	2930.73	-3.01416	6.30286
16.5	10467.1	-49987.8	-6549.53	-4323.2	375.429	2080.61	-3961.58	-6092.62	164.732	3160.59	-382.94	320.352
17	10335.3	-52865.1	-6860.21	-4780.05	319.686	2044.51	-4036.52	-6373.23	-84.8233	3249.49	-773.074	513.207
17.5	10132	-55656.4	-7070.8	-5321.15	313.065	1994.23	-4129.87	-6682.7	-365.154	3258.65	-1042.65	626.485
18	9838.96	-58475.8	-7154.63	-5849.17	357.985	1895.19	-4247.71	-6996.07	-554.147	3199.03	-1170.49	715.27
18.5	9441.81	-61287.6	-7119.9	-6379.72	518.294	1737.79	-4399.88	-7255.86	-643.447	2945.95	-1139.21	726.479
19	8891.76	-63970.6	-6959.02	-6978.29	771.987	1538.18	-4489.75	-7385.31	-759.424	2463.11	-974.994	638.42
19.5	8183.17	-66560.1	-6620.3	-7483.13	1092.28	1350.28	-4511.46	-7452.4	-838.355	1930.11	-733.618	473.071
20	7458.14	-69151.2	-6194.88	-7651.38	1461.21	1228.71	-4559.35	-7570.91	-791.98	1444.16	-452.683	220.436
20.5	6848.61	-71646.8	-5795.48	-7505.3	1816.43	1137.86	-4621.85	-7661.58	-653.809	1013.93	-185.244	-75.816
21	6343.05	-73889.4	-5292.07	-7154.21	2149.78	1019.56	-4623.39	-7678.05	-451.302	690.4	46.2524	-369.839
21.5	5931.65	-75924.4	-4490.04	-6547.7	2429.52	854.398	-4591.66	-7689.64	-227.936	551.295	253.606	-655.585
22	5564.07	-77874.2	-3337.59	-5617.37	2636.19	659.758	-4564.49	-7710.74	-9.23239	625.605	464.94	-815.041
22.5	5147.1	-79760	-1973.3	-4353.68	2828.2	448.167	-4518.18	-7717.05	201.16	807.298	644.414	-789.04
23	4679.4	-81506.8	-572.863	-2721.63	2938.31	198.854	-4450.49	-7631.1	404.258	972.042	727.036	-661.186
23.5	4143.32	-82998.5	887.434	-748.748	2944.85	-71.5245	-4384.08	-7445.6	623.438	1092.56	744.045	-443.335
24	3545.77	-84269.6	2506.91	1485.06	2965.72	-292.447	-4344.24	-7293.88	862.581	1228.39	729.868	-201.343
24.5	2960.63	-85461.6	4207.77	3877.2	2994.15	-396.542	-4313.32	-7254.6	1059.13	1423.96	674.059	-47.1614
25	2393.23	-86438.9	5846.24	6330.17	2966.01	-411.424	-4297.39	-7328.84	1090.03	1621.92	605.663	43.3624
25.5	1892.59	-86888.8	7427.15	8852.77	2824.54	-451.259	-4289.33	-7500.12	939.865	1715.93	482.816	196.601
26	1553.47	-86850.9	9061.78	11432.8	2552.61	-572.672	-4197.58	-7705.43	785.029	1700.54	177.279	420.209
26.5	1318.6	-86519.7	10768.4	13874.7	2237.58	-738.61	-3993.75	-7834.4	722.132	1564.85	-296.881	523.673
27	1062.54	-85827.5	12483.7	16014.7	1932.01	-965.165	-3759.12	-7883.4	679.058	1248.72	-737.121	455.179
27.5	820.078	-84776	14215.2	18065.7	1644.12	-1303	-3634.38	-7943.28	684.618	893.926	-1000.03	301.298
28	676.564	-83671.7	15972.1	20439.2	1382.92	-1718.51	-3694.71	-7968.43	766.246	623.742	-1142.18	76.0955
28.5	537.715	-82839.5	17776.1	23165.7	1117.52	-2034.44	-3904.55	-7942.09	823.814	402.572	-1220.27	-207.087
29	332.817	-82422.1	19686.4	25864.5	856.184	-2135.02	-4271.95	-7909.91	810.3	188.045	-1263.55	-606.051
29.5	146.305	-82448.1	21727.8	28241.9	657.986	-2170.61	-4783.15	-7764.64	778.881	-77.7825	-1297.54	-1091.42
30	94.8042	-82928.3	23860.1	30258.2	549.575	-2186.06	-5250.56	-7485.85	809.976	-370.755	-1295.1	-1406.05
30.5	215.477	-83889.3	25997	32156.8	578.707	-2085.92	-5522.75	-7223.95	870.092	-644.919	-1336.82	-1495.96
31	357.964	-85326.2	28119.6	34157.5	811.096	-1976.18	-5573.41	-7010.18	830.595	-891.519	-1488.37	-1485.52
31.5	396.132	-87204.5	30228.7	36057	1192.34	-1961.72	-5367.57	-6754.37	576.545	-1024.49	-1632.71	-1361.78
32	346.603	-89530.6	32268.2	37543.1	1567.12	-2012.53	-4906.41	-6500.91	145.474	-964.67	-1632.1	-1135.69
32.5	261.252	-92259	34249.4	38508.7	1864.9	-2107.59	-4282.05	-6374.08	-280.453	-752.511	-1461.31	-789.106
33	196.447	-95204.7	36341.3	39137.9	2092.24	-2223.76	-3634.72	-6359.59	-657.685	-463.125	-1183.37	-281.868
33.5	138.442	-98193.6	38744	39779.7	2162.32	-2332.19	-3153.38	-6409.69	-976.98	-154.689	-877.645	274.453
34	57.3882	-101203	41488.4	40521.7	2039.24	-2462.15	-2981.98	-6497.38	-1067.2	90.8844	-669.466	792.014
34.5	-61.5918	-104148	44538.9	41265.8	1889.77	-2693.05	-2997.3	-6583.78	-862.756	228.881	-689.153	1188.63
35	-246.872	-106763	48034.2	42039.7	1820.3	-3006.47	-3008.27	-6665.47	-515.504	330.534	-911.454	1322.52
35.5	-477.031	-108880	52152.4	43078.1	1763.43	-3302.21	-3014.71	-6824.15	-124.821	439.884	-1156.54	1186.57
36	-774.152	-110516	56841.4	44739.9	1641.61	-3572.45	-3070.36	-7121.39	292.978	441.934	-1280.78	902.971
36.5	-1166.37	-111717	61845.3	47217.7	1447.92	-3795.88	-3179.1	-7426.71	614.18	279.529	-1275.49	522.058
37	-1583.66	-112519	66905.8	50456.6	1277.6	-3906.65	-3301.5	-7600.04	731.428	46.9799	-1190.37	66.597
37.5	-1979.87	-113021	71841.4	54324.5	1223.27	-3952.75	-3432.74	-7640.18	671.385	-171.145	-988.96	-392.279
38	-2431.71	-113356	76457.9	58730.5	1213.36	-3976.81	-3623.55	-7629.31	571.14	-330.613	-682.057	-815.186
38.5	-2989.8	-113532	80478.2	63452	1135.51	-4013.84	-3835.22	-7654.85	604.132	-401.494	-451.362	-1215.53
39	-3586.32	-113494	83709.8	68082.3	952.68	-4110.25	-3953.85	-7734.22	716.057	-471.951	-413.875	-1610.78
39.5	-4146.32	-113347	86199.4	72311.8	706.545	-4212.87	-3950.42	-7799.2	767.925	-657.913	-499.797	-1925.39
40	-4585.17	-113250	88102.8	75932.3	490.175	-4319.95	-3877.65	-7729.48	745.387	-837.71	-610.264	-2028.89
40.5	-4959.91	-113174	89574.9	78799.6	332.971	-4429.52	-3724.14	-7534.15	677.838	-867.069	-698.644	-1861.42
41	-5438.07	-113108	90685.5	80926.9	265.973	-4476.31	-3491.74	-7346.98	590.703	-810.983	-661.798	-1516.24
41.5	-5941.83	-113068	91475.6	82403.4	292.35	-4505	-3280.07	-7165.07	468.791	-753.482	-483.414	-1099.31
42	-6320.64	-112888	92062.7	83339.9	344.944	-4587.95	-3089.21	-6890.62	333.938	-722.681	-360.274	-604.552
42.5	-6666.85	-112556	92469.2	83902.7	432.234	-4722.26	-2881.38	-6516.4	302.137	-694.773	-448.569	-76.9564
43	-7107.19	-112193	92698.6	84270.3	564.572	-4877.27	-2698.11	-6164.41	446.805	-620.949	-690.557	412.028
43.5	-7636.85	-111809	92843.8	84535.3	661.708	-5034.47	-2514.72	-5908.49	702.167	-483.579	-900.384	855.351
44	-8153.86	-111437	92944.8	84670.5	664.108	-5202.79	-2297.26	-5709.66	993.254	-252.779	-996.164	1214.03
44.5	-8587.53	-111115	93007.9	84544.4	670.767	-5414	-2120.77	-5591.05	1283.58	-11.6832	-1008.18	1410.06
45	-9002.74	-110786	93135.1	84095.8	800.532	-5724.09	-2073.77	-5503.02	1534.06	44.098	-915.715	1418.22
45.5	-9467	-110347	93623.2	83447.9	953.971	-6136.04	-2139.38	-5341.48	1744.53	-87.2487	-709.997	1279.06
46	-9927.15	-109772	94809.2	82853.5	1052.34	-6590.48	-2227.14	-5139.79	1882.73	-325.646	-433.818	1064.11
46.5	-10290.3	-109119	96673.2	82549.6	1169.47	-7022.62	-2298.2	-4931.53	1807.9	-753.136	-240.136	791.307
47	-10612.9	-108402	98813	82526.7	1282.39	-7353.4	-2347.25	-4678.32	1445.68	-1366.75	-208.497	422.474
47.5	-10956.6	-107616	100847	82649	1396.21	-7555.32	-2356.86	-4357.73	923.492	-1956.23	-163.503	31.2794
48	-11213.6	-106779	102692	82888.7	1515.77	-7662.93	-2293.1	-4034.87	471.034	-2320.76	-78.6265	-260.82
48.5	-11265.7	-105914	104374	83270.9	1541.93	-7658.24	-2122.5	-3725.16	135.607	-2430.77	-154.918	-473.436
49	-11153.8	-104981	105783	83936.6	1532.58	-7509.38	-1942.77	-3274.22	-199.736	-2352.02	-450.09	-688.326
49.5	-11043.1	-103883	106846	85168.3	1513.81	-7259.59	-1887.01	-2698.13	-503.279	-2114.48	-852.305	-829.627
50	-10953.8	-102637	107458	86982.5	1382.39	-6987.45	-1869.98	-2187.61	-671.756	-1741.31	-1267.8	-742.776
50.5	-10784.3	-101325	107423	89122.9	1243.65	-6777.19	-1801.76	-1777.84	-681.369	-1329.85	-1634.5	-492.19
51	-10588.3	-99987.1	106677	91408.1	1204.06	-6634.14	-1767.52	-1453.16	-557.126	-999.549	-1924.34	-263.442
51.5	-10472.8	-98612.4	105201	93656.7	1130.51	-6509.43	-1773.89	-1219.08	-340.667	-768.192	-2208.26	-65.3856
52	-10448.9	-97175.5	102984	95578.4	984.433	-6417.3	-1682.6	-1062.63	-32.039	-566.552	-2520.04	148.722
52.5	-10558.5	-95702.6	100025	96924.8	869.785	-6356.94	-1382.55	-1018.64	360.368	-357.349	-2747.53	249.4
53	-10940.9	-94171.3	96433.6	97572	813.387	-6345.88	-975.956	-1001.86	739.13	-222.049	-2782	158.149
53.5	-11593.7	-92562.4	92531.5	97474.3	734.336	-6388.21	-647.083	-823.979	1085.17	-296.64	-2606.08	-59.9458
54	-12331.5	-90947.5	88604	96693.5	577.372	-6400.97	-362.114	-508.254	1393.7	-601.438	-2204.06	-358.961
54.5	-13048.6	-89362.7	84756.1	95311.9	466.603	-6409.16	-38.3154	-177.59	1531.88	-1009.79	-1682.83	-717.462
55	-13688.3	-87837.4	80996	93312.7	484.08	-6497.67	289.814	148.742	1488.48	-1389.19	-1165.92	-1073.79
55.5	-14182.4	-86418.3	77288.2	90742.2	560.375	-6689.35	589.169	520.305	1345.38	-1626.46	-557.764	-1404.14
56	-14527.1	-85047.2	73643.5	87815.9	641.747	-6923.76	872.736	929.981	1070.78	-1702.07	52.6274	-1733.41
56.5	-14826.3	-83656.6	70124.3	84691.4	732.599	-7098.32	1163.59	1259.47	637.71	-1744.22	418.828	-1971.99
57	-15144.8	-82297.5	66823.6	81391.2	837.022	-7198.55	1413	1431.28	104.761	-1789.11	548.504	-2125.93
57.5	-15407.5	-81042.6	63867.3	78008.3	888.475	-7231.87	1628.64	1494.4	-497.176	-1765.42	556.43	-2237.95
58	-15596.1	-79862	61232.2	74789.1	887.246	-7197.37	1901.76	1511.82	-1083.68	-1628.98	446.28	-2250.32
58.5	-15767.2	-78624.2	58875.2	71866.4	869.86	-7195.53	2189.8	1540.42	-1571.89	-1368.81	197.452	-2237.25
59	-15929	-77272.4	56823.1	69160.7	817.361	-7293.67	2351.98	1608.61	-1952.59	-1082.39	-144.551	-2255.04
59.5	-16096	-75957.8	54956.2	66664.8	792.015	-7393.15	2343.1	1634.88	-2093.26	-870.331	-544.107	-2224.61
60	-16275.7	-74751.9	53115.5	64403.3	877.59	-7454.02	2268.29	1564.26	-1988.08	-692.544	-975.949	-2063.38
60.5	-16479.6	-73479.3	51276.5	62392.8	985.992	-7498.27	2224.47	1465.71	-1807.36	-533.089	-1455.03	-1709.74
61	-16799.8	-72085.6	49506.1	60694.1	1001.09	-7502.55	2160.59	1437.64	-1540.89	-520.963	-1937.94	-1225.63
61.5	-17201.4	-70627.3	47864.1	59250.2	947.223	-7447.81	2017.24	1433.41	-1118.52	-708.977	-2231.37	-799.981
62	-17532	-69066.8	46336.3	57916	876.354	-7293.01	1845.85	1416.46	-579.861	-953.59	-2221.49	-564.96
62.5	-17804.3	-67335.1	44937.6	56658	764.689	-7080.64	1679.43	1472.41	-37.8946	-1163.02	-1951.76	-555.734
63	-18109.4	-65387.8	43786.2	55510.3	525.792	-6922.74	1569.24	1549.69	405.39	-1395.38	-1525.59	-748.33
63.5	-18411.5	-63249.1	42884.7	54455.2	170.322	-6820.76	1577.69	1577.14	743.879	-1665.42	-1050.28	-1077.61
64	-18625	-60938.3	42061.1	53495.4	-209.96	-6767.44	1691.56	1629.35	1000.46	-1861.15	-566.067	-1399.5
64.5	-18794.6	-58383	41216.5	52577.5	-529.731	-6806.96	1963.37	1764.11	1180.69	-1914.46	-27.7021	-1583.61
65	-18987.6	-55434.1	40376.9	51568.5	-692.854	-6903.1	2335.72	1944.39	1243.96	-1849.69	543.664	-1671.68
65.5	-19123.6	-52066.4	39544.9	50465.8	-710.986	-6966.8	2570.5	2092.18	1112.61	-1697.69	1048.36	-1757.37
66	-19148.3	-48473.4	38652.7	49377	-645.988	-6925.17	2658.59	2188.37	820.13	-1522.15	1363.16	-1804.6
66.5	-19100.9	-44771.5	37663.9	48336.4	-521.368	-6781.14	2715.67	2354.29	445.744	-1358.04	1430.59	-1729.43
67	-19009	-40834.2	36668.6	47283.1	-456.167	-6608.56	2689.45	2633.36	-6.59943	-1160.51	1412.89	-1553.97
67.5	-18871.8	-36697.9	35763	46175.2	-484.172	-6423.43	2604.15	2852.92	-521.641	-888.728	1432.44	-1347.98
68	-18619.7	-32678.3	34910.1	45040.9	-521.619	-6202.67	2519.9	2967.64	-1027.16	-622.971	1389.47	-1095.81
68.5	-18248.9	-28881.4	33996	43857.4	-565.886	-5970.33	2401.56	3080	-1336.82	-435.286	1252.34	-721.893
69	-17893.5	-25183.8	33027.9	42559.1	-650.761	-5774.97	2285.07	3174.62	-1325.31	-222.213	1069.79	-226.892
69.5	-17631.8	-21585.4	32103.9	41120.5	-768.831	-5624.17	2101.98	3180.06	-1057.65	89.3962	746.399	318.356
70	-17441.5	-18251.4	31253	39558.4	-796.053	-5434.94	1799.87	3072.24	-609.589	405.639	298.365	803.762
70.5	-17342.9	-15337.4	30465.1	37894.3	-658.307	-5139.78	1536.07	2875.22	-3.92294	551.628	-72.0195	1106.63
71	-17387.8	-12892.8	29712.6	36106	-484.619	-4890.55	1396.1	2614.29	670.149	418.599	-224.615	1147.37
71.5	-17541.9	-10892	28991	34270.2	-334.231	-4858.74	1393.28	2297.53	1228.67	80.4406	-161.107	937.643
72	-17769.6	-9265.33	28294	32535.9	-109.278	-4973.76	1515.15	1989.81	1561.38	-319.253	-9.52637	616.724
72.5	-18086.4	-7934.56	27578.8	30901.3	153.894	-5135.13	1688.54	1803.79	1666.9	-732.648	150.966	253.194
73	-18484.3	-6894.82	26921.5	29319.4	350.64	-5338.43	1837.28	1792.88	1597.4	-1145.95	322.65	-177.834
73.5	-18942.8	-6111.68	26425.8	27819.5	446.289	-5571.36	1923.7	1894.9	1393.53	-1462.58	518.413	-562.518
74	-19436.2	-5411.55	26040.5	26534.9	422.095	-5756.39	2015.03	2007.65	1105.74	-1560.74	679.544	-796.277
74.5	-19887.4	-4680.42	25769.4	25607.1	345.813	-5855.6	2149.93	2095.46	866.183	-1394.65	715.714	-923.08
75	-20219.9	-3924.4	25700.1	24976.8	260.862	-5940.44	2282.36	2143.5	719.225	-1051.15	691.56	-933.438
75.5	-20453.1	-3175.45	25849.9	24564.1	159.075	-6011.55	2391.16	2104.23	567.439	-708.155	649.134	-835.489
76	-20633.7	-2505.76	26195.6	24347.9	77.8781	-5994.8	2492.18	1970.54	402.798	-409.678	495.455	-729.969
76.5	-20821.8	-1971.48	26625	24320.7	9.36487	-5907.21	2630.18	1835.36	229.079	-84.162	201.266	-583.7
77	-21044.7	-1437.64	27052.5	24478.3	-55.5226	-5764.98	2778.79	1788.27	-12.658	195.142	-163.952	-370.789
77.5	-21210.1	-612.688	27506.4	24749.6	-104.527	-5544.19	2870.52	1753.55	-241.741	345.898	-449.071	-194.808
78	-21280.9	689.172	27958	25217.5	-185.221	-5314.6	2909.49	1601.45	-305.022	352.174	-571.263	-14.1218
78.5	-21284.8	2420.66	28284.6	25914.1	-295.087	-5178.25	2889.94	1349.59	-163.678	103.08	-664.342	278.22
79	-21219	4404.2	28418.7	26579.2	-368.2	-5157.64	2793.8	1064.49	101.729	-345.064	-778.896	602.142
79.5	-21111.6	6506.89	28420.2	27072.5	-364.78	-5209.01	2617.02	727.635	379.173	-740.424	-837.324	853.595
80	-20980	8701.8	28277.8	27387.2	-293.322	-5288.64	2376	327.178	634.997	-985.448	-876.23	1054.53
80.5	-20743.1	11060.4	27995.8	27467.8	-166.404	-5377.85	2174.64	-24.4663	958.731	-1136.68	-922.684	1132.28
81	-20379.4	13582.8	27676.8	27311.5	55.8905	-5446.88	2060.28	-257.485	1318.98	-1212.38	-937.103	969.439
81.5	-19981.1	16088.3	27325.2	26951.1	313.634	-5458.78	1952.24	-445.959	1491.23	-1174.55	-871.399	636.131
82	-19591	18410.7	26905.2	26368.7	488.187	-5421.4	1820.21	-609.864	1417.36	-1110.95	-680.802	264.37
82.5	-19207	20519.3	26410.8	25472	585.925	-5371.51	1672.33	-694.738	1226.85	-1093.49	-373.698	-90.0106
83	-18804.7	22403.7	25860.2	24225.3	686.179	-5301.92	1496.44	-685.194	979.052	-1003.04	-55.0913	-424.877
83.5	-18359.5	23966.1	25261	22777.7	809.378	-5210.92	1313.25	-619.688	684.202	-751.706	114.749	-683.021
84	-17831	25063.9	24617.3	21375	932.938	-5097.4	1143.98	-536.36	401.291	-379.793	70.4277	-741.843
84.5	-17198.6	25702.9	23949.1	20100	1110.41	-4944.53	1006.07	-421.282	190.899	-14.4948	-125.768	-604.432
85	-16534.2	26005.6	23272.4	18906.3	1365.55	-4859.1	906.823	-251.956	79.5148	240.999	-320.274	-406.674
85.5	-15909.3	26003.9	22593.3	17798.1	1587.17	-4944.89	825.18	-142.531	58.2829	386.399	-381.616	-159.463
86	-15261.8	25728	21805.9	16907	1696.72	-5120.73	735.786	-219.711	106.262	466.307	-306.706	177.946
86.5	-14500	25228.2	20817.8	16489.4	1709.29	-5255.06	690.384	-440.922	168.226	511.119	-231.323	519.84
87	-13697	24608.1	19773.2	16613.7	1654.93	-5298.5	732.02	-770.232	222.307	463.408	-332.774	785.075
87.5	-12897.8	23987.1	18902.3	17115.3	1596.19	-5249.05	790.846	-1170.4	413.509	297.152	-602.487	1004.54
88	-12033.4	23388.9	18270.6	17856.3	1541.42	-5050.18	918.727	-1515.67	832.544	78.9677	-936.723	1215.82
88.5	-11083.9	22889.4	17775.2	18755.9	1426.93	-4648.43	1217.2	-1686.61	1329.54	-156.699	-1285.08	1380.55
89	-10082.2	22534	17448.2	19732	1272.18	-4081.28	1558.18	-1627.82	1706.55	-379.372	-1573.28	1438.94
89.5	-9082.03	22275.7	17527.4	20728.5	1118.57	-3461.71	1791.53	-1372.15	1894.91	-469.94	-1663.15	1341.16
90	-8076.42	22079.9	18086.5	21565	936.661	-2876.48	1910.05	-984.452	1924.08	-320.088	-1437.12	1105.57
90.5	-6990.44	21920.3	18997.2	21884.5	724.911	-2356.74	1927.14	-539.464	1785.97	-9.4729	-934.475	807.962
91	-5819.46	21800.5	20156.3	21498.8	549.738	-2020.67	1871.54	-82.5404	1503.53	296.618	-287.087	517.735
91.5	-4633.4	21674.3	21387.1	20487	487.649	-1942.99	1747.93	330.003	1230.68	527.726	439.685	241.913
92	-3519.27	21446.6	22314.8	19010.7	556.33	-2019.14	1549.47	584.815	1041.09	754.277	1193.48	-30.9019
92.5	-2556.6	21094.1	22630	17228.3	725.872	-2142	1321.96	682.393	837.489	998.16	1784.87	-234.003
93	-1729.54	20659.2	22326.2	15306.8	968.952	-2290.09	1084.74	716.641	533.705	1162.33	2050.21	-324.227
93.5	-1036.25	20090.5	21564.9	13420.4	1177.68	-2433.66	872.486	683.378	179.282	1303.35	2033.7	-327.567
94	-548.908	19181	20406.8	11701.6	1278.53	-2513.52	703.324	521.892	-137.833	1466.7	1823.6	-269.009
94.5	-279.279	17920.4	18856.3	10206.1	1374.04	-2524.49	494.725	290.429	-374.476	1469.11	1442.38	-164.864
95	-165.709	16562.1	17070.3	8922.97	1504.5	-2483.12	264.552	107.065	-538.22	1240.83	985.127	-43.8845
95.5	-86.3179	15185.9	15191.1	7914.26	1625.08	-2402.25	95.9277	-25.8771	-665.383	936.497	593.074	41.5735
96	64.6733	13729	13272.8	7320.96	1764.49	-2344.87	-49.416	-186.073	-771.995	651.196	328.834	59.4973
96.5	242.47	12283.6	11415.1	7155.82	1915.27	-2359.63	-156.375	-404.572	-836.004	331.625	184.624	-46.5984
97	341.355	10938.6	9722.28	7279.35	2059.42	-2396.77	-173.306	-614.747	-822.831	-81.6744	120.524	-303.125
97.5	357.975	9616.29	8245.78	7544.24	2191.12	-2388.7	-174.62	-770.092	-709.207	-513.733	152.93	-540.593
98	379.301	8319.4	6951.14	7877.27	2221.76	-2335.97	-220.727	-943.301	-475.707	-801.295	308.044	-580.353
98.5	489.603	7202.24	5750.2	8215.41	2135.39	-2234.53	-259.892	-1175.19	-195.699	-928.124	530.809	-444.087
99	634.602	6272.39	4619.01	8467.43	2016	-2072.24	-157.969	-1427.71	62.0552	-966.796	794.042	-226.611
99.5	695.46	5448.81	3540.6	8553.78	1904.73	-1907.53	-5.36523	-1643.98	368.049	-805.801	1066.83	4.42615
100	665.938	4777.33	2598.71	8320.31	1817.3	-1768.87	105.762	-1746.46	760.246	-327.939	1320.55	134.859
100.5	642.113	4276.46	1807.32	7388.89	1802.27	-1612.59	300.618	-2060.15	1086.11	343.263	1519.32	-193.785
101	656.423	3842.25	975.629	5782.41	1849.85	-1448.32	499.273	-2740.35	1163.55	961.146	1608.52	-960.295
101.5	655.76	3413.84	271.516	4204.68	1870.99	-1300.37	673.379	-3010.48	1026.11	1392.38	1569.82	-1440.63
102	660.697	2983.53	-167.664	2959.85	1851.08	-1160.08	812.15	-2547.81	787.602	1657.47	1325.31	-1425.65
102.5	730.977	2513.43	-509.305	1851.33	1877.42	-1048.54	801.269	-1887.15	458.388	1801.37	930.71	-1227.97
103	828.628	2024.71	-721.164	700.562	1964.94	-965.59	745.615	-1367.07	51.1123	1788.97	509.819	-964.322
103.5	914.02	1550.37	-783.73	-521.816	1978.55	-855.634	752.445	-1029.97	-311.212	1532.02	103.003	-723.354
104	1024.05	1068.88	-788.855	-1623.61	1826.26	-742.63	780.469	-834.747	-493.131	1135.08	-243.511	-548.468
104.5	1105.8	589	-770.039	-2494.02	1563.24	-719.28	843.664	-704.949	-517.436	767.92	-487.882	-354.77
105	1117.31	151.324	-703.484	-3172.73	1306.22	-755.631	995.857	-637.535	-470.805	435.743	-583.354	-131.958
105.5	1140.04	-267.102	-545.723	-3689.97	1100.88	-734.903	1165.21	-708.94	-364.357	171.979	-480.064	32.1819
106	1241.81	-812.414	-386.805	-4004.87	920.71	-641.403	1220.91	-947.168	-188.261	89.2711	-209.827	167.844
106.5	1454.33	-1627.77	-389.055	-4080.05	721.025	-565.378	1145.54	-1305.95	29.051	229.21	82.9336	300.41
107	1723.71	-2700.73	-554.262	-3982.74	471.3	-539.604	1024.37	-1694.35	129.624	503.851	374.26	316.328
107.5	2008.02	-3914.3	-755.586	-3801.47	233.355	-482.897	907.411	-2026.09	45.023	846.423	779.719	202.489
108	2460.53	-5201.03	-901.594	-3532.17	23.5006	-326.27	751.356	-2287.87	-34.4554	1271.45	1261.26	69.2331
108.5	3144.01	-6616.46	-1016.4	-3154.5	-198.776	-92.8816	504.55	-2489.8	-70.5922	1800.12	1674.06	-34.202
109	3954.25	-8234.89	-1162.57	-2780.2	-377.296	128.565	219.697	-2611.52	-120.499	2420.68	1948.41	-140.708
109.5	4861.48	-10097.3	-1341.73	-2516.13	-488.642	290.725	-13.9351	-2723.74	-107.818	3045.88	2024.2	-246.369
110	5782.46	-12232	-1469.09	-2359.64	-548.67	405.32	-210.967	-2920.85	-44.2155	3572.9	1885.31	-266.229
110.5	6591.95	-14596.9	-1504.17	-2297.14	-487.441	472.32	-391.157	-3161.13	-39.4358	3875.32	1635.74	-229.958
111	7280.95	-17093.3	-1557	-2272.46	-331.494	468.017	-523.67	-3399.39	-72.2782	3882.85	1425.33	-267.195
111.5	7865.22	-19714.7	-1710.14	-2203.97	-167.367	453.981	-647.566	-3692.38	-54.758	3629.81	1370.29	-353.645
112	8307.24	-22500.9	-1912.76	-2108.13	38.5295	551.962	-787.707	-4027.84	-38.1299	3213.61	1455.89	-348.236
112.5	8597.62	-25362.3	-2166.61	-2064.16	319.336	731.215	-872.594	-4269.94	-51.9221	2784.2	1533.02	-272.959
113	8823.62	-28180	-2594.75	-2051.96	612.485	893.193	-893.178	-4398.48	-121.765	2348.05	1520.94	-298.501
113.5	9101.6	-31014.5	-3164.51	-2029.28	863.564	1011.28	-954.197	-4497.67	-343.797	1893.02	1480	-413.01
114	9409.85	-34038.9	-3737.35	-2025.55	1086.85	1066.15	-1077.36	-4570.82	-567.39	1562.72	1467.49	-469.884
114.5	9631.86	-37135.4	-4367.14	-2066.14	1267.06	987.756	-1216.32	-4660.07	-609.774	1340.6	1470.59	-495.917
115	9747.46	-40131	-5067.96	-2221.86	1415.72	779.125	-1370.33	-4860.76	-571.562	1114.57	1448.47	-665.41
115.5	9774.07	-43179.7	-5663.68	-2561.24	1518.38	508.884	-1586.29	-5135.25	-469.006	989.6	1378.36	-1017.73
116	9763.93	-46352.2	-6158.93	-3046.57	1493.93	209.899	-1931.44	-5449.23	-245.466	1088.44	1262.84	-1417.59
116.5	9746.77	-49529.2	-6631.83	-3611.68	1315.5	-79.224	-2300.86	-5791.4	-28.8665	1395.42	1087.61	-1773.45
117	9556.7	-52574.1	-7023.3	-4226.7	1026.68	-342.677	-2578.17	-6083	90.289	1833.27	857.429	-1997.74
117.5	9089.41	-55425.2	-7304.34	-4864.6	698.007	-545.833	-2820.42	-6348.09	251.157	2341.78	643.058	-2047.54
118	8526.81	-58209.9	-7488.52	-5537.66	297.691	-668.531	-3043.57	-6619.27	638.48	2834.25	416.379	-1987.05
118.5	8037.33	-60978	-7584.16	-6199.73	-177.614	-797.034	-3257.52	-6848.89	1179.48	3192.4	89.688	-1887.38
119	7584.3	-63655.5	-7560.95	-6736.46	-589.901	-985.439	-3464.51	-7041.55	1586.7	3414.05	-236.226	-1840.81
119.5	7112.08	-66304.4	-7438.15	-7122.4	-815.884	-1178.8	-3631.5	-7199.42	1752.56	3480.69	-428.797	-1814.94
120	6655.66	-68981.4	-7240.74	-7309.59	-847.688	-1333.74	-3768.39	-7281.08	1735.05	3319.09	-498.116	-1670.74
120.5	6222.24	-71629.9	-6903.5	-7226.16	-773.933	-1452.84	-3853.85	-7327.79	1513.92	2930.94	-485.741	-1366.27
121	5737.05	-74152.6	-6359.43	-6875.47	-579.98	-1558.96	-3890.64	-7337	1125.7	2383.58	-428.865	-1037.78
121.5	5179.88	-76382.4	-5571.89	-6243.03	-199.083	-1646.84	-3913.77	-7225.13	705.694	1752.65	-308.976	-867.126
122	4619.32	-78351.6	-4639.6	-5338.83	225.891	-1677.21	-3954.37	-7138.94	399.347	1109.09	17.8413	-837.414
122.5	4132.15	-80281	-3671.04	-4264.04	505.128	-1735.34	-4060.69	-7219.56	247.339	568.069	568.951	-863.13
123	3703.83	-82070.8	-2513.63	-3014.94	675.207	-1897.08	-4197.27	-7381.74	164.742	196.699	1133.53	-889.061
123.5	3300.21	-83547.9	-1030.73	-1456.52	818.018	-2091.94	-4272.11	-7572.8	161.181	-3.5686	1584.41	-834.411
124	3003.14	-84800.6	680.422	447.875	863.377	-2307.03	-4280.53	-7758	202.162	8.10754	1914.43	-711.384
124.5	2804.82	-85921.9	2486.32	2503.64	803.081	-2572.06	-4220.29	-7836.58	161.766	236.363	2084.09	-610.528
125	2611.72	-86843.6	4331.96	4597.45	764.108	-2906.89	-4136.19	-7812.87	141.862	600.834	2122.72	-601.54
125.5	2491.86	-87420	6211.47	6874.78	795.385	-3271.99	-4173.61	-7776.74	296.177	981.253	2073.89	-668.663
126	2570.52	-87548.6	8111.38	9347.47	795.09	-3579.89	-4289.35	-7704.82	591.097	1272.75	1871.76	-684.822
126.5	2722.22	-87125.1	10015.6	11829.7	682.834	-3867.02	-4387.25	-7573.05	898.465	1476.58	1521.33	-623.271
127	2729.41	-86214.7	11907.2	14218.2	520.691	-4142.18	-4509.05	-7460.79	1104.36	1621.43	1116.39	-605.804
127.5	2663.49	-85110.5	13784.6	16630.8	382.591	-4345.29	-4620.56	-7400.78	1199.7	1734.86	671.88	-657.404
128	2631.64	-84014	15595.2	19381.6	253.84	-4465.16	-4681.99	-7355.05	1225.84	1876.05	142.421	-759.849
128.5	2515.08	-83054.1	17370.7	22602.1	110.922	-4483.25	-4703.51	-7298.68	1160.72	2028.78	-464.567	-927.604
129	2262.12	-82477.5	19330.7	25906.1	-19.0654	-4436.17	-4713.67	-7177.85	919.318	2079.48	-1116.64	-1119.85
129.5	1980.43	-82424.5	21477.6	28822.7	-124.5	-4384.95	-4781.65	-6972.4	526.134	2006.78	-1728.12	-1301.59
130	1705.95	-82764.3	23557.6	31292.9	-229.661	-4312.59	-4808.84	-6731.93	162.15	1894.62	-2126.68	-1462.62
130.5	1395.32	-83499.7	25492.4	33567	-349.156	-4232.34	-4696.13	-6473.04	-122.68	1702.08	-2288.98	-1553.21
131	986.973	-84858	27368.3	35897.5	-494.798	-4222.98	-4493.14	-6209.63	-387.481	1368.56	-2308.91	-1562.14
131.5	564.582	-86959.6	29219.7	38147.2	-656.522	-4253.87	-4154.61	-5976.61	-564.928	955.081	-2223.59	-1538.85
132	307.86	-89694.1	31140.7	39931.4	-812.588	-4286.45	-3681.63	-5805.06	-588.446	543.601	-2013.96	-1481.14
132.5	160.369	-92775.4	33217.8	41144.6	-963.46	-4362.8	-3186.27	-5742.65	-413.563	212.363	-1565.92	-1399.7
133	-14.8433	-96016.7	35498.8	41964.5	-1056.14	-4435.25	-2757.48	-5774.53	-41.2476	3.7677	-884.585	-1273.21
133.5	-193.94	-99333	38103.7	42656.1	-1013.97	-4502.25	-2503.39	-5804.06	381.526	-102.792	-162.382	-1026.26
134	-317.749	-102556	41046.8	43361.4	-905.109	-4629.26	-2483.85	-5807.37	760.561	-172.113	457.054	-745.67
134.5	-442.546	-105532	44303.5	44043.3	-827.91	-4823.06	-2601.48	-5856.76	1106.39	-209.544	871.638	-520.812
135	-665.686	-108157	48022	44666.6	-684.309	-5054.17	-2771.27	-5982.64	1356.45	-190.076	1009.22	-336.203
135.5	-968.961	-110382	52275.7	45435.7	-394.029	-5269.8	-2979.41	-6161.97	1394.02	-89.3304	942.033	-199.73
136	-1232.87	-112164	56907.3	46746.4	-22.6655	-5451.48	-3099.36	-6415.46	1227.2	152.697	809.398	-110.494
136.5	-1396.17	-113455	61772.5	48847.4	336.076	-5582.66	-3070.15	-6739.57	955.588	401.002	701.46	-107.346
137	-1555.76	-114243	66744.3	51829.3	595.225	-5663.52	-3084.79	-7081.2	600.269	422.566	626.427	-251.21
137.5	-1781.27	-114590	71618.9	55621.9	779.242	-5754.41	-3281	-7407.2	215.62	194.282	470.713	-540.922
138	-2019.8	-114763	76194	59938.3	973.251	-5904.01	-3557.98	-7695.27	-86.1263	-177.203	127.611	-905.344
138.5	-2302.31	-114876	80210.4	64481.6	1186.72	-6110.8	-3850.55	-7946.04	-357.662	-658.826	-310.597	-1305.1
139	-2711.76	-114799	83389.7	68983.8	1383.39	-6354.26	-4198.73	-8173.75	-677.683	-1285.83	-694.709	-1714.47
139.5	-3202.81	-114666	85769.9	73061.9	1575.95	-6620.21	-4522.83	-8364.39	-1006.82	-1978.68	-979.544	-2040.56
140	-3684.68	-114588	87558.9	76424.2	1769.61	-6889.75	-4681.78	-8414.67	-1326.6	-2547.84	-1111.95	-2276.45
140.5	-4179.85	-114422	88839.2	79107.3	1898.83	-7148.29	-4690.73	-8238.83	-1596.66	-2891.9	-1131.79	-2468.26
141	-4696.96	-114132	89799.6	81226.8	1887.63	-7396.63	-4670.54	-7954.01	-1685.04	-3072.44	-1137.16	-2534.54
141.5	-5127.33	-113765	90602.5	82774.9	1758.1	-7640.62	-4652.74	-7691.44	-1575.19	-3221.78	-1113.08	-2369.06
142	-5506.49	-113388	91159.3	83758	1592.12	-7833.98	-4574.85	-7451.24	-1326.95	-3379.56	-1036.55	-2011.26
142.5	-5933.27	-113002	91426.4	84279.9	1432.69	-7956.28	-4401.28	-7231.98	-962.703	-3452.01	-903.274	-1589.23
143	-6343.44	-112503	91536	84486.5	1339.19	-8029.47	-4107.26	-7020.45	-546.206	-3409.96	-725.595	-1270.28
143.5	-6674.36	-112035	91594.1	84434.4	1297.26	-8065.62	-3738.6	-6791.53	-131.446	-3312.04	-557.775	-1161.72
144	-6939.55	-111769	91587.4	84109.1	1256.85	-8099.07	-3320.1	-6641.54	245.201	-3113.41	-427.455	-1211.28
144.5	-7166.85	-111538	91469.7	83541.8	1313.05	-8134.3	-2774.23	-6588.91	522.201	-2799.4	-330.492	-1419.61
145	-7346.25	-111200	91370.4	82743.5	1538.54	-8232.19	-2198.56	-6464.39	576.316	-2471.94	-240.292	-1763.91
145.5	-7531.9	-110893	91709.9	81857.9	1771.93	-8468.02	-1757.83	-6275.48	368.505	-2157.4	-110.777	-2091.9
146	-7797.5	-110668	92858.6	81275.6	1874.92	-8825.27	-1423.17	-6094.19	75.7185	-1776.55	-4.0625	-2334.12
146.5	-8107.91	-110370	94771.5	81246.3	1957.33	-9232.61	-1114.72	-5875.94	-129.035	-1373.95	-35.7388	-2466.52
147	-8489.59	-109965	97044.1	81715.1	2062.93	-9593.08	-851.308	-5556.14	-225.863	-1135.89	-183.536	-2508.98
147.5	-8985.7	-109461	99261.5	82503.3	2088.09	-9826.58	-663.457	-5107.14	-214.09	-1122.06	-308.967	-2550.19
148	-9517.82	-108789	101228	83478.3	2055	-9889.5	-522.878	-4614.95	-119.226	-1273.53	-358.26	-2646.95
148.5	-9962.85	-107946	102832	84594.8	2055.18	-9803.45	-369.618	-4094.05	-65.5491	-1533.65	-351.53	-2780.37
149	-10260.4	-106924	104052	85845.3	2080.95	-9582.96	-187.496	-3566.12	-149.936	-1875.73	-256.517	-2953.44
149.5	-10448.3	-105741	105019	87277.5	2073	-9223.29	-49.4673	-3163.31	-238.545	-2228.35	-59.8667	-3154.14
150	-10562.8	-104454	105663	88964	2019.18	-8804.33	-4.46289	-2868.04	-107.127	-2451.77	223.45	-3199.41
150.5	-10624.8	-103063	105724	90926.9	1982.14	-8477.6	-29.3091	-2589.72	139.674	-2534.3	483.353	-3057.71
151	-10681.4	-101531	105046	93051.8	2003.55	-8333.75	-68.2886	-2368.46	255.955	-2583.66	567.792	-2911.66
151.5	-10707	-99835.3	103526	95154.7	2062.58	-8317.52	-117.357	-2228.97	282.95	-2627.73	518.279	-2774.9
152	-10692	-98033.2	101163	97049.8	2145	-8321.16	-184.219	-2104.51	344.878	-2578.29	405.137	-2531.26
152.5	-10746.7	-96237	98127.4	98516.5	2220.86	-8298.18	-223.709	-1955.67	433.734	-2399.82	209.656	-2141.22
153	-10903.6	-94452.2	94624.5	99374.1	2259.57	-8276.3	-220.73	-1780.02	472.254	-2182.05	1.69043	-1739.59
153.5	-11096.2	-92612.4	90867.4	99472.5	2265.01	-8233.91	-135.008	-1636.02	377.75	-1938.69	-195.617	-1448.4
154	-11271.3	-90810	87025.2	98776.7	2197.89	-8106.31	65.4814	-1570.12	185.371	-1653.44	-451.919	-1227.73
154.5	-11452.1	-89156.1	83182.6	97367.9	2007.47	-8034.06	361.507	-1529.05	-70.0023	-1366.61	-730.868	-1072.15
155	-11804.4	-87684.3	79417.1	95328.8	1756.02	-8154.65	734.059	-1458.77	-389.13	-1204.03	-904.142	-973.308
155.5	-12365	-86462.6	75806.5	92787.2	1495.63	-8327.69	1125.64	-1368.61	-679.731	-1335.01	-850.558	-902.665
156	-12927.1	-85376.7	72357.2	89821.5	1168.3	-8482.78	1494.93	-1280.92	-892.64	-1715.76	-603.667	-927.307
156.5	-13421.9	-84241.5	69052.5	86489.2	794.883	-8677.31	1879.94	-1144.98	-1008.94	-2266.04	-369.935	-1108.81
157	-13970.7	-83081.9	65981.4	82935.5	461.913	-8850.57	2248.18	-952.073	-990.096	-2917.45	-268.403	-1412.22
157.5	-14604	-81941.7	63215.5	79368.2	142.941	-8989.25	2498.69	-735.745	-847.111	-3462.14	-241.714	-1746.61
158	-15202.1	-80716.9	60659.9	75999.9	-219.98	-9130.71	2636.42	-529.25	-581.345	-3783.47	-244.411	-1928.22
158.5	-15674	-79245.8	58284.7	72928.8	-587.398	-9273.14	2704.72	-413.274	-225.971	-3928.45	-289.66	-1834.11
159	-16079.8	-77593	56149.2	70136.5	-876.018	-9420.76	2719.43	-343.89	173.38	-3988.84	-297.695	-1607.84
159.5	-16457.5	-76093.4	54228	67623.1	-1037.41	-9521.19	2706.24	-233.268	620.979	-4012.44	-115.777	-1357.78
160	-16775.8	-74872.6	52529.8	65436.3	-1063.37	-9553.25	2701.77	-133.822	1102.83	-3955.83	266.123	-1053.17
160.5	-17029.7	-73701.8	50987.7	63515.7	-964.643	-9535.01	2683.87	-76.9349	1580.86	-3813.24	735.847	-738.178
161	-17247.1	-72373.8	49500	61808.4	-757.122	-9442.41	2595.16	-16.4727	1911.33	-3599.53	1185.17	-501.823
161.5	-17494.2	-70924.6	48139.6	60401.2	-483.703	-9280.62	2451.64	30.5619	1956.19	-3205.56	1561.18	-397.443
162	-17743.2	-69474.8	46894.5	59282.8	-181.762	-9100.6	2282.51	65.3837	1862.91	-2624.22	1845.45	-386.644
162.5	-17972.2	-67841.8	45612.7	58351.1	89.7434	-8967.23	2109.06	122.157	1780.9	-2057.27	2015.77	-450.903
163	-18235.5	-65781.1	44229.9	57545.2	244.709	-8907.67	2013.84	189.739	1660.91	-1604.06	2047.31	-609.177
163.5	-18478.7	-63453.7	42808.6	56797.3	309.433	-8882.04	2030.67	260.486	1496.54	-1248.95	1853.86	-790.669
164	-18652.7	-61010.3	41458.4	56015.7	316.742	-8906.05	2084.8	312.929	1333.94	-1021.63	1455.64	-957.714
164.5	-18763.2	-58290.7	40224	55134.2	300.482	-8971.91	2151.38	361.026	1164.42	-927.809	1009.05	-1096.55
165	-18795.8	-55152.8	39069.7	54181.9	391.123	-9043.32	2225.36	466.034	934.953	-953.699	599.986	-1257.72
165.5	-18767.6	-51676	37959.4	53192.8	563.863	-9195.19	2288.09	579.1	655.152	-1125.5	283.744	-1535.18
166	-18714.4	-48026.9	36884.6	52082.2	689.261	-9434.73	2384.27	635.161	430.822	-1443.74	80.146	-1804.25
166.5	-18646.4	-44247.3	35837.6	50756.9	788.416	-9689.31	2530.56	716.403	307.898	-1791.58	-76.6665	-1896.95
167	-18546.9	-40252.3	34821.8	49228.6	904.701	-9888.66	2705.01	856.337	198.959	-2041.73	-157.992	-1881.78
167.5	-18407.9	-36039.6	33863.2	47603.7	908.074	-9948.82	2907.84	1018.45	17.2476	-2190.01	-86.3091	-1885.09
168	-18228.2	-31838.4	32977.6	46002.5	693.513	-9819.9	3067.1	1203.82	-189.541	-2239.72	44.791	-1915.43
168.5	-18076.1	-27824.4	32134.2	44386.7	396.898	-9500.37	3096.39	1417.08	-351.282	-2176.88	177.201	-1914.43
169	-18027.6	-24026.1	31337.2	42640.5	185.144	-9004.23	3022.25	1659.42	-488.309	-2028.2	347.428	-1837.34
169.5	-17978.2	-20538.8	30666.4	40786.9	61.2201	-8314.67	2887.76	1876.81	-561.913	-1816.83	481.694	-1708.55
170	-17862.7	-17476.9	30103	38912.1	-87.3682	-7555.8	2749.79	1981.01	-519.875	-1580.3	531.718	-1577.27
170.5	-17772.1	-14916.8	29514.8	37077.4	-280.135	-7036.77	2726.98	1950.63	-382.177	-1349.07	561.442	-1460.22
171	-17783.7	-12824.6	28902.6	35307.9	-472.786	-6824.88	2836.76	1889.54	-210.467	-1127.21	625.943	-1280.99
171.5	-17930	-11123.3	28363.6	33624.1	-660.854	-6710.45	2939.91	1913.88	-100.154	-923.105	713.138	-1010.57
172	-18149.5	-9825.75	27886.7	32106.2	-831.485	-6636.2	2992.97	1977.26	-91.0183	-760.963	687.183	-754.804
172.5	-18310.4	-8833.03	27470.1	30772.1	-1051.87	-6665.38	3069.45	2000.76	-175.959	-730.521	441.802	-510.896
173	-18369	-7905.54	27206.9	29557.7	-1273.11	-6751.73	3077.78	2056.16	-350.964	-855.387	97.0244	-228.513
173.5	-18399.3	-6899.97	27118.5	28482.1	-1327.47	-6832.23	2935.19	2207.11	-537.324	-1015.52	-214.496	34.0729
174	-18424	-5841.75	27046.7	27620	-1281.29	-6865.57	2762.02	2374.72	-614.973	-1118.65	-467.803	253.076
174.5	-18452.8	-4811.49	26880.6	26988.2	-1250.58	-6791.85	2599.97	2435.67	-583.455	-1192.58	-683.445	388.003
175	-18616.9	-3765.36	26698.4	26561.1	-1165.79	-6623.25	2446.98	2339.01	-491.852	-1260.89	-894.855	441.913
175.5	-18937.6	-2627.23	26609.2	26310.5	-969.426	-6410.09	2362.23	2170.1	-410.145	-1185.92	-1001.94	527.409
176	-19253.7	-1430.66	26685.4	26240.9	-719.203	-6185.85	2338.12	2043.4	-380.867	-899.629	-896.438	605.44
176.5	-19565	-322.496	26958.5	26337.4	-437.5	-5980.6	2359.59	1912.31	-286.033	-539.671	-587.858	514.195
177	-19991	597.688	27341.9	26478.8	-122.57	-5791.32	2418.5	1716.62	-95.4465	-232.995	-82.5073	189.966
177.5	-20444.1	1617.74	27781.2	26569.2	165.852	-5647.7	2421.3	1519.76	90.2426	-42.4064	565.601	-241.128
178	-20810.9	3073.49	28314.1	26648.8	345.878	-5605.26	2296.53	1368.47	307.309	48.3705	1176.42	-620.935
178.5	-21136.6	4819.64	28836.6	26743.1	394.754	-5617.67	2087.98	1346.05	556.919	114.005	1643.61	-952.619
179	-21415	6627.98	29224.3	26816	391.162	-5622.11	1882.83	1515.97	669.265	157.017	2051.46	-1285.41
179.5	-21469	8494.78	29457.2	26802.2	411.224	-5612.78	1726.32	1740.42	595.845	149.125	2412.03	-1555.3
180	-21176.1	10467.3	29578.7	26641.7	412.814	-5581.17	1622.72	1886.37	479.082	102.647	2590.69	-1699.38
180.5	-20690.7	12607.1	29640.9	26423.5	318.829	-5495.86	1602.92	1934.97	452.31	-4.08459	2509.22	-1762.58
181	-20176	14936.5	29653.6	26215.3	192.364	-5369.46	1675.69	1844.87	459.644	-155.428	2211.5	-1719.01
181.5	-19540.5	17304.8	29628	25999	84.5225	-5274.43	1788.78	1644.19	374.074	-243.886	1751.28	-1465.27
182	-18713.4	19434.6	29469.5	25723.7	-15.7773	-5190.16	1880.79	1386.55	220.872	-272.671	1268.8	-956.277
182.5	-17807.6	21202.5	29090.1	25197.2	-11.8947	-5140.94	1935.27	1080.48	4.47	-393.857	912.159	-260.743
183	-16952.8	22609.6	28541.1	24322.7	116.728	-5237.97	1965.46	838.184	-262.854	-617.67	600.024	397.387
183.5	-16203	23651.5	27857.2	23209.9	259.869	-5417.31	1955.86	751.188	-371.877	-808.788	273.826	886.676
184	-15495.5	24300.3	27024.4	21999.9	356.283	-5537.08	1884.33	697.478	-238.76	-952.608	38.6641	1254.09
184.5	-14785.5	24552.9	26032.4	20759	421.639	-5547.54	1781.12	577.765	-46.1634	-1096.65	3.95117	1477.09
185	-14119.5	24583.8	24987	19433.7	526.831	-5472.85	1669.45	478.552	63.2079	-1222.21	178.324	1426.75
185.5	-13476.3	24521.4	24049.8	17990	657.448	-5336.76	1534.05	386.874	42.5176	-1210.72	509.763	1106.22
186	-12777.7	24375	23172.3	16650.5	698.146	-5106.07	1397.68	234.716	-71.3685	-994.065	914.508	691.958
186.5	-11948.7	24157.4	22189.9	15807.1	640.231	-4830.82	1278.88	117.758	-225.789	-656.283	1273.81	217.916
187	-11014.5	23901.6	21103.4	15582.9	616.155	-4643.46	1169.02	85.9898	-396.367	-284.51	1545.68	-391.155
187.5	-10071.8	23673.1	20085.3	15887.9	693.973	-4519.65	1078.01	48.7332	-471.415	69.3319	1761.03	-1051.04
188	-9055.85	23472.1	19246.4	16687.9	797.804	-4391.04	1037.88	35.3995	-489.28	369.165	1887.25	-1613.88
188.5	-7862.98	23289.5	18536.3	17794.3	899.558	-4316.44	1063.91	138.334	-665.553	544.877	1815.37	-1976.05
189	-6585.89	23052.5	17976.9	19014.7	1028.07	-4306.62	1069.42	241.661	-976.565	536.455	1578.9	-2083.91
189.5	-5356.17	22712.2	17749.4	20315.3	1218.64	-4316.9	982.094	217.725	-1266.92	386.79	1271.77	-1985.95
190	-4130.25	22338.2	18022.6	21477.2	1493.53	-4299.57	889.237	127.504	-1540.06	211.928	905.452	-1786.81
190.5	-2876.86	21921.7	18794.2	22120.8	1753.76	-4173.52	845.237	48.514	-1738.48	44.5802	541.85	-1577.67
191	-1695.59	21454.4	19832.9	22006.8	1882.19	-3936.66	787.32	4.43359	-1768.91	-166.395	238.867	-1351.33
191.5	-705.284	20915.1	20843.2	21171.5	1900.84	-3648.78	716.218	10.2527	-1632.79	-356.458	30.3281	-978.195
192	51.5093	20243	21649.1	19854.3	1925.54	-3322.54	644.688	37.6874	-1369.85	-431.51	-106.532	-393.03
192.5	663.583	19416.1	22102.2	18225	2002.04	-3011.69	530.743	56.6853	-1068.13	-453.514	-192.364	238.287
193	1208.32	18440	22030.1	16333.8	2083.16	-2766.8	424.919	77.684	-773.462	-537.126	-105.357	676.764
193.5	1634.46	17359.9	21377	14278.8	2117.19	-2530.71	391.923	106.598	-501.452	-645.956	229.709	814.762
194	1867.29	16241.5	20251.9	12335.9	2134.37	-2360.13	389.866	125.657	-262.236	-642.478	724.574	744.427
194.5	1942.23	15154.9	18821.9	10808.1	2177.69	-2341.13	376.888	104.754	-59.6596	-497.654	1223.75	655.284
195	1885.75	14097.7	17192.2	9704.13	2154.66	-2376.65	419.57	52.9519	73.4347	-255.089	1592.79	559.59
195.5	1748.94	12990.9	15470.5	8876.25	2012.95	-2370.41	608.087	36.8942	100.943	27.2421	1776.83	404.68
196	1634.28	11848.5	13778.5	8294.8	1846.69	-2290.56	899.776	3.67737	36.109	277.737	1806.74	246.91
196.5	1496.11	10796.9	12085.9	7968.79	1721.11	-2126.54	1167.45	-119.332	13.27	491.26	1767.13	38.6119
197	1279.99	9829.47	10423.6	7820.89	1643.99	-1920.73	1291.16	-237.338	122.954	709.026	1759.03	-276.875
197.5	1014.96	8851.47	9012.72	7771.45	1591.06	-1699.85	1298.45	-371.624	264.552	950.248	1780.73	-544.9
198	787.59	7853.32	7850.28	7794.42	1546.98	-1468.72	1273.24	-707.511	349.155	1105.78	1684.81	-618.276
198.5	707.702	6871.47	6773.08	7851.48	1503.17	-1288.41	1113.73	-1236.1	363.073	1027.69	1439.2	-442.97
199	792.51	5992.24	5789.59	7885.56	1382.77	-1192.94	804.629	-1739.55	316.507	752.079	1194.88	-56.4764
199.5	1020.53	5227.54	4877.32	7856.62	1202.39	-1167.64	454.686	-2098.73	174.057	434.032	1033.7	385.15
200	1292.64	4529.12	3983.42	7687.07	1044.46	-1232.39	186.461	-2309.43	-109.86	142.6	1064.98	798.497
200.5	1433.59	3910.15	3118.97	7018.28	906.185	-1377.69	84.4551	-2767.07	-428.209	-159.353	1280.62	930.033
201	1357.21	3350.16	2255.28	5800.3	777.485	-1543.14	106.151	-3638.5	-725.545	-478.654	1536.86	790.686
201.5	1111.9	2841.18	1566.82	4697.43	709.574	-1656.66	296.654	-4144.02	-1025.24	-695.523	1796.17	1026.99
202	819.385	2374.04	1080.58	3982.14	782.17	-1662.02	519.463	-3935.24	-1218.51	-695.552	1902.5	1674.52
202.5	548.992	1926.21	558.246	3337.05	946.211	-1577.49	598.878	-3406.52	-1286.53	-539.692	1875.83	2103.93
203	273.577	1538.81	115.199	2524.32	1082.6	-1473.76	622.815	-2900.95	-1302.08	-333.709	1923.6	2031.11
203.5	7.85693	1174.63	-75.5586	1564.89	1155.59	-1370.73	573.166	-2592.04	-1220.7	-90.5164	2114.18	1648.83
204	-94.5029	754.809	-62.707	645.723	1176.73	-1188.93	428.255	-2445.69	-1023.04	197.468	2380.48	1209.93
204.5	40.3379	334.504	91.6055	-191.035	1211.37	-912.965	282.925	-2359.45	-788.096	525.306	2552.22	681.908
205	345.193	-9.61328	312.023	-1059.74	1333.13	-687.693	135.364	-2303.07	-569.112	865.736	2604.81	53.3549
205.5	795.936	-318.555	558.519	-1957.18	1497.14	-558.357	-36.9624	-2320.56	-333.87	1124.06	2587.29	-458.053
206	1388.6	-719.723	844.555	-2724.78	1605.41	-427.6	-148.204	-2370.85	-107.476	1299.69	2451.96	-730.156
206.5	2012.2	-1359.89	1138.82	-3290.3	1698.44	-279.443	-193.63	-2386.12	85.0073	1473.96	2191.29	-781.406
207	2544.58	-2301.13	1376.96	-3712.23	1842.26	-177.293	-279.669	-2393.26	256.6	1519.08	1929.32	-610.249
207.5	3070.53	-3515.83	1547.96	-3980.32	1963.16	-99.8953	-409.92	-2422.75	343.914	1395.86	1767.41	-270.876
208	3719.81	-4962.58	1634.79	-4048.7	2088.48	43.022	-495.846	-2565.21	320.222	1288.32	1617.51	131.211
208.5	4501.1	-6603.55	1606.11	-3974.53	2294.67	200.899	-546.206	-2866.89	243.092	1190.56	1348.87	582.499
209	5349.27	-8428.42	1508.51	-3852.85	2455.19	307.236	-641.247	-3225.71	126.363	995.798	992.801	1056.41
209.5	6200.36	-10433.2	1370.48	-3673.3	2439.68	484.491	-749.014	-3619	-127.479	740.342	732.491	1498.88
210	7045.42	-12599.6	1098.39	-3360.21	2288.32	781.404	-840.117	-4081.57	-498.778	515.61	642.792	1919.02
210.5	7859.44	-14974.8	646.133	-2973.06	2103.95	1058.69	-1008.73	-4507.69	-902.436	338.181	578.608	2203.67
211	8621.14	-17572.7	101.09	-2683.39	1954.79	1299.91	-1228.36	-4819.96	-1358.7	218.793	491.658	2217.49
211.5	9330.39	-20317.9	-465.41	-2529.89	1873.42	1523.51	-1372.59	-5048.85	-1798.31	268.618	517.161	2026.68
212	9955.31	-23188.6	-1066.52	-2406	1846.16	1614.46	-1452.17	-5211.67	-2117.41	584.131	619.929	1704.99
212.5	10455.2	-26166.8	-1743.83	-2335.39	1883.93	1583.14	-1459.61	-5332.13	-2268.88	1028.53	637.164	1229.57
213	10856.1	-29246.7	-2448.52	-2438.68	2032.73	1515.35	-1383.9	-5385.34	-2198.24	1387.48	662.235	638.415
213.5	11225.9	-32475.9	-3051.98	-2694.84	2222.65	1397.13	-1311.49	-5416.3	-1884.52	1666.95	841.907	59.3065
214	11490.2	-35823.1	-3538.7	-2993.48	2376.73	1200.14	-1260.37	-5541.42	-1433.52	1912.31	1049.64	-412.864
214.5	11515.4	-39184.8	-4004.64	-3289.46	2524.54	931.81	-1307.96	-5697.64	-1018.54	2062.16	1093.45	-821.701
215	11354.1	-42483	-4447.22	-3628.86	2604.8	694.548	-1543	-5812.37	-691.645	2085.25	979.684	-1171.21
215.5	11114.3	-45650.3	-4813.8	-4006.5	2586.12	590.309	-1859.3	-5945.73	-402.127	1993.88	870.331	-1316.63
216	10847	-48667	-5154.94	-4284.16	2586.21	602.39	-2162.54	-6094.01	-190.232	1829.01	864.358	-1230.36
216.5	10558.4	-51593	-5521.13	-4451.69	2630.36	642.09	-2434.77	-6200.23	-176.743	1567.17	932.146	-1019.97
217	10190.5	-54429.5	-5877.81	-4717.02	2636.57	637.363	-2718.46	-6240.2	-352.031	1138.74	999.887	-756.554
217.5	9728.89	-57126.1	-6178.79	-5130.87	2552.24	639.586	-3071.68	-6237.72	-692.904	573.559	971.895	-445.554
218	9234.79	-59721.4	-6371.84	-5504.73	2413.86	644.637	-3406.63	-6238	-1153.48	-21.6881	760.649	-89.4858
218.5	8761	-62202	-6431.64	-5702.93	2341.61	534.946	-3649.95	-6265.26	-1580.23	-447.964	376.424	186.495
219	8323.4	-64511.9	-6381.23	-5807.28	2388.11	316.934	-3822.44	-6381.67	-1873.75	-588.756	-11.4746	299.267
219.5	7932.04	-66790	-6257.81	-5888.44	2419.42	78.7176	-3940.13	-6596.79	-1956.91	-523.565	-196.655	307.565
220	7570.23	-69184.2	-6014.29	-5792.68	2334.94	-175.576	-4026.35	-6868	-1797.85	-344.529	-121.84	239.395
220.5	7195.55	-71538.5	-5560.48	-5463.74	2194.3	-457.994	-4066.58	-7160.47	-1447.21	-180.458	160.523	112.2
221	6787.23	-73684.8	-4896.7	-5056.76	2034.32	-714.172	-4107.12	-7427.23	-1023.89	-109.834	562.953	-88.5978
221.5	6317.73	-75743.7	-3997.13	-4543.64	1862.44	-900.023	-4215	-7683.79	-602.154	-28.0137	970.01	-406.64
222	5777.21	-77776.6	-2872.84	-3774.52	1679.31	-979.286	-4341.66	-7925.32	-146.27	168.064	1335.87	-839.031
222.5	5270.95	-79728.5	-1642.16	-2774.38	1425.76	-960.7	-4418.62	-8078.35	292.555	402.232	1687.88	-1359.08
223	4887.99	-81660.4	-327.781	-1575.65	1045.91	-917.894	-4381.25	-8135.18	613.87	547.156	2069.49	-1887.31
223.5	4618.2	-83571.3	1106.29	-143.26	637.745	-916.471	-4244.51	-8125.89	801.872	636.807	2495.71	-2275.15
224	4457.35	-85387.5	2640.91	1537.53	329.601	-991.915	-4066.28	-8037.76	853.382	695.995	2847.79	-2400.35
224.5	4333.43	-87019.5	4298.57	3456.75	76.8883	-1093.06	-3869.17	-7882.36	797.496	651.359	2983.28	-2223.68
225	4123.66	-88253.1	6136.28	5590.79	-89.8875	-1222.21	-3754.55	-7716.25	633.875	482.959	2958.13	-1829.55
225.5	3845.74	-88952.5	8204.15	7974.5	-48.4911	-1476.51	-3783.3	-7557.11	321.203	262.652	2836.79	-1387.09
226	3595.7	-89166.3	10412.2	10597.6	212.551	-1807.52	-3862.91	-7473.42	-57.1627	90.4873	2546.49	-909.958
226.5	3388.59	-88909.4	12532.7	13292	618.625	-2112.45	-3938.85	-7593.76	-484.286	8.06165	2072.12	-367.301
227	3191.86	-88133	14482.8	15867.5	1004.66	-2344.37	-4063.95	-7814.69	-940.376	-46.8512	1478.33	122.914
227.5	2994.3	-86967.3	16346.8	18412.3	1287.67	-2467.79	-4278.18	-7901.89	-1262.15	-175.606	937.602	532.743
228	2780.28	-85736.5	18156	21284.7	1476.38	-2498.87	-4450.58	-7823.84	-1368.36	-362.012	618.7	872.129
228.5	2501.01	-84701.5	19835.5	24470.3	1538.52	-2431.5	-4436.65	-7650.39	-1317.95	-593.126	467.39	1041.58
229	2176.45	-84030.8	21440.6	27493.1	1552.5	-2361.56	-4364.64	-7422.74	-1297.77	-873.004	405.407	995.009
229.5	1860.61	-83853.8	23092.8	29987.1	1583.23	-2414.54	-4356.64	-7201.77	-1343.8	-1081.86	443.906	788.754
230	1573.34	-84174.9	24741.8	31907.8	1585.51	-2523.54	-4332.58	-6998.62	-1308.87	-1099.58	555.616	520.492
230.5	1355.67	-84941.2	26350.3	33545.3	1546.28	-2668.98	-4232.28	-6807.58	-1155.82	-928.677	712.11	220.668
231	1207.71	-86193.6	28052.8	35267.3	1470.76	-2928.72	-4075.02	-6670.82	-962.539	-700.176	939.148	-131.357
231.5	1061.67	-88082.8	29899.4	37056.6	1381.53	-3290.01	-3867.25	-6582.42	-743.584	-483.01	1227.74	-519.081
232	904.173	-90625.4	31750.3	38566.9	1251.17	-3643.64	-3606.61	-6455.98	-431.881	-218.448	1494.2	-828.031
232.5	793.593	-93571.3	33628.8	39572.8	1032.08	-3872.84	-3323.85	-6228.44	-134.723	45.3776	1619.11	-993.278
233	762.355	-96687	35767	40194.7	788.296	-3988.13	-3072.59	-5956.48	-37.6972	183.711	1598.66	-1068.43
233.5	735.983	-99855.5	38357	40731.4	524.119	-4089.34	-2844.48	-5711.2	-25.147	194.088	1539	-1009.46
234	549.773	-102935	41426.3	41259	187.816	-4168.4	-2585.95	-5516.01	139.336	173.528	1436.1	-761.923
234.5	225.393	-105789	44914.4	41703.9	-103.962	-4187.21	-2377.62	-5369.29	392.703	198.257	1259.37	-429.231
235	-72.2681	-108307	48893.7	42194.4	-246.284	-4186.99	-2319	-5258.13	519.637	170.673	1012.59	-164.015
235.5	-344.248	-110373	53423	43012.9	-261.279	-4188.14	-2398.47	-5272.54	419.176	27.3038	712.695	-5.16589
236	-671.255	-111960	58313.5	44516.4	-120.878	-4224.5	-2588.47	-5469.01	148.086	-85.6351	413.365	74.0807
236.5	-1030.72	-113147	63277.9	46958.7	220.172	-4350.61	-2788.86	-5791.12	-124.01	-110.496	155.022	123.835
237	-1336.82	-114053	68146.9	50378.9	631.859	-4542.49	-2996.46	-6216.28	-312.439	-91.4716	47.9697	166.022
237.5	-1569.33	-114704	72818.5	54651.3	970.825	-4753.97	-3311.55	-6704.9	-399.151	2.04724	148.012	194.22
238	-1761.63	-115029	77091.2	59423	1288.06	-4902.62	-3625.86	-7174.55	-348.728	208.503	355.123	228.344
238.5	-1917.88	-114992	80724.5	64331.3	1570.79	-4968.18	-3901.75	-7547.38	-246.03	486.383	622.213	186.937
239	-2110.06	-114653	83615	69100.9	1705.4	-5036.97	-4159.77	-7787.84	-154.206	745.576	930.312	-27.2552
239.5	-2478.39	-114203	85813.1	73373.1	1722.42	-5060.28	-4274.54	-7882.69	2.01575	939.334	1222.63	-438.307
240	-2993.76	-113814	87452.7	76907.6	1728.04	-5011.67	-4291.71	-7818.37	293.873	1075.04	1438.62	-1012.65
240.5	-3490.59	-113482	88647.6	79658.3	1792.45	-4986.78	-4313.29	-7647.42	664.339	1147.78	1511.76	-1600.03
241	-3924.17	-113168	89551	81604.4	1909.08	-5012.79	-4337.58	-7483.46	943.564	1185.02	1470.25	-2033.1
241.5	-4381.81	-112927	90383.9	82843.9	1957.06	-5106.24	-4332.97	-7351.17	1078.83	1183.02	1401.05	-2234.11
242	-4908.75	-112757	91184.4	83502.2	1873.92	-5272.46	-4199.72	-7153.85	1076.2	1100.23	1260.56	-2187.03
242.5	-5443.71	-112565	91840	83684.5	1745.77	-5474.1	-3926.36	-6906.03	914.888	996.01	916.071	-1932.17
243	-5942.8	-112284	92328.8	83574	1657.45	-5688.62	-3557.05	-6691.36	622.579	841.428	420.769	-1572.78
243.5	-6424.8	-111911	92739.3	83266.9	1594.47	-5888.35	-3077.16	-6448.66	280.354	500.303	-56.5596	-1167.83
244	-6853.45	-111531	93137.3	82878.2	1490.03	-6095.39	-2536.53	-6106.05	6.68616	18.809	-489.629	-747.378
244.5	-7226.07	-111172	93489.1	82526.1	1318.93	-6285.51	-2010.2	-5715.72	-168.874	-433.042	-865.534	-412.169
245	-7621.4	-110771	93791.9	82141.9	1127.81	-6399.04	-1627.62	-5343.2	-300.102	-836.344	-1116.53	-185.962
245.5	-8000.96	-110350	94317.7	81703.1	945.273	-6495.12	-1455.71	-5011.12	-375.941	-1263.56	-1166.85	-27.4448
246	-8284.79	-109902	95392.2	81407.3	754.575	-6556.01	-1352.45	-4744.1	-415.309	-1671.76	-1015.59	57.5514
246.5	-8517.08	-109341	97007.4	81509.9	584.135	-6535.66	-1242.65	-4531.41	-513.054	-1996.09	-728.861	53.6187
247	-8719.49	-108670	98940.4	81962.8	446.569	-6496.19	-1141.72	-4358.18	-603.139	-2266.59	-258.153	-54.7919
247.5	-8823.09	-107946	100866	82518.1	298.333	-6447.43	-1056.17	-4216.92	-602.564	-2492.05	417.147	-179.42
248	-8828	-107161	102558	83208.5	155.227	-6362.52	-993.317	-4048.93	-588.165	-2564.5	1136.66	-204.149
248.5	-8744.94	-106297	104015	84064.1	42.4336	-6244.8	-928.008	-3854.82	-616.007	-2421.46	1703.76	-96.9688
249	-8579.34	-105338	105257	84871.1	-70.5663	-6095.24	-874.609	-3683.61	-673.011	-2146.22	2078.2	86.4979
249.5	-8500.34	-104296	106275	85747.7	-166.385	-5940.68	-816.567	-3517.99	-717.62	-1821.33	2363.55	237.35
250	-8602.44	-103235	106956	87044.3	-195.572	-5835.09	-691.025	-3308.14	-756.885	-1532.19	2614.05	374.755
250.5	-8842.64	-102119	107088	88754.1	-119.918	-5867.82	-512.449	-3071.66	-816.124	-1363.99	2756.86	534.283
251	-9249.93	-100847	106524	90570.2	28.6057	-6077.69	-294.465	-2869.77	-818.406	-1294.89	2668.97	668.647
251.5	-9800.68	-99468	105196	92292	154.203	-6337.34	-18.5303	-2694.06	-758.278	-1286.81	2332.59	838.187
252	-10324.3	-98038.8	103091	93873.1	241.35	-6531.73	277.794	-2493.04	-725.429	-1345.2	1850.06	1069.52
252.5	-10730.4	-96531.1	100307	95088.5	291.955	-6594.26	550.007	-2161.49	-693.508	-1480.75	1272.24	1283.2
253	-11151.2	-94928.6	97039.9	95746.1	329.787	-6537.99	769.584	-1647.11	-631.464	-1686.5	571.762	1438.85
253.5	-11639.2	-93203.2	93484.8	95876	410.563	-6512.98	851.71	-1101.88	-635.398	-1873.51	-158.832	1510.06
254	-12105.4	-91349.6	89762.6	95429	531.473	-6513.21	828.688	-680.316	-776.078	-1898.97	-738.816	1539.81
254.5	-12521	-89542.9	85938.1	94305.3	666.936	-6494.75	820.781	-403.572	-963.973	-1844.94	-1140.38	1528.49
255	-12874.9	-87953.2	82085.7	92543.9	798.42	-6529.96	827.673	-283.222	-1057.38	-1885.28	-1417.37	1384.85
255.5	-13123.3	-86517.9	78261.5	90290.6	957.955	-6573.17	852.275	-290.129	-973.402	-1972.29	-1565.18	1096.46
256	-13285.9	-85169.7	74502.9	87621.2	1190.58	-6567.58	906.981	-355.111	-699.116	-2088.45	-1566.05	749.332
256.5	-13533.9	-83868.3	70879.3	84536.8	1432.96	-6523.71	964.892	-497.584	-425.631	-2222.4	-1442.08	375.9
257	-13904.9	-82587.7	67477.1	81156.2	1569.4	-6448.37	1021.32	-649.616	-330.462	-2271.76	-1170.43	-70.2164
257.5	-14271.4	-81368.9	64379.6	77730.6	1622.06	-6392.75	1106.34	-715.247	-287.138	-2209.28	-739.196	-570.302
258	-14643.1	-80144.4	61605.4	74520.4	1657.56	-6371.36	1212.05	-742.331	-178.704	-2052.79	-293.44	-1059.37
258.5	-15016.9	-78792	59125.7	71640.9	1605.87	-6324.82	1292.42	-757.34	-36.7989	-1877.04	12.3774	-1482.82
259	-15376.4	-77266.4	56885	69029.5	1454.44	-6225.4	1388.73	-779.867	147.993	-1825.85	205.404	-1781.55
259.5	-15782.6	-75746.3	54836.4	66634.4	1289.71	-6085.8	1511.62	-820.254	368.152	-1912.47	411.28	-1913.77
260	-16191.2	-74471.5	52972.5	64476.9	1074.68	-5937.32	1539.42	-793.052	452.512	-1953.73	593.018	-1923.83
260.5	-16529.7	-73288.8	51238.6	62581.8	766.247	-5868.25	1437.01	-631.81	314.638	-1871.61	631.72	-1881.91
261	-16899.8	-71988.8	49558.1	60914.9	455.539	-5926.58	1309.06	-343.895	78.8667	-1805.32	540.594	-1821.7
261.5	-17325.1	-70649.9	47933.8	59421.7	164.381	-6017.07	1224.92	59.7094	-163.966	-1903.54	339.842	-1690.54
262	-17643.7	-69350	46400.9	58105.3	-128.217	-6028.18	1214.63	519.898	-360.14	-2138.56	-9.03955	-1392.48
262.5	-17874.8	-67897	44925.5	56931.8	-338.626	-5995.56	1314.56	884.463	-511.846	-2347.95	-456.978	-952.627
263	-18078.2	-66007.6	43518	55900.9	-425.307	-6007.25	1495.44	1099.34	-650.454	-2524.29	-877.246	-487.749
263.5	-18178.2	-63764.4	42257.1	55098.4	-433.296	-6056.85	1664.19	1295.04	-744.281	-2719.04	-1143.24	-108.537
264	-18220.1	-61387.8	41143.8	54428.4	-396.836	-6104.31	1811.37	1496.27	-813.607	-2812.82	-1257.34	177.995
264.5	-18306.6	-58754.6	40108.1	53693.6	-335.256	-6121.54	1939.51	1583.5	-853.575	-2770.83	-1317.32	436.38
265	-18413.6	-55599.5	39090.6	52843.6	-308.193	-6080.49	1943.03	1559	-740.012	-2672.04	-1263.87	617.927
265.5	-18402.2	-51990.9	38152.9	51917.9	-361.159	-6016.71	1776.24	1500.88	-448.239	-2532.09	-1012.38	707.421
266	-18202.4	-48249.2	37364.9	50906.3	-428.656	-5979.01	1554.65	1445.17	-165.747	-2399.49	-612.254	760.761
266.5	-17943.5	-44434	36658.8	49720.4	-457.66	-5942.58	1437.16	1415.52	-81.1194	-2349.71	-196.016	672.049
267	-17730.4	-40345.7	35958.6	48369.6	-459.515	-5903.76	1475.88	1400.52	-151.93	-2375.6	160.519	358.024
267.5	-17510.5	-36030.8	35274.1	46908.2	-415.973	-5866.08	1556.31	1384.64	-214.756	-2346.95	519.889	-76.1991
268	-17167.2	-31781.3	34683.9	45342.1	-359.374	-5854.91	1555.49	1374.32	-210.519	-2159.77	875.865	-498.18
268.5	-16679.6	-27766.7	34171.7	43721	-291.81	-5885.93	1542.29	1370.34	-162.166	-1861.93	1134.9	-836.062
269	-16247.1	-23956	33624.2	42029.8	-135.1	-5883.63	1591.77	1352.69	-85.5038	-1550.71	1246.19	-1049.06
269.5	-16027.6	-20390.9	32989.1	40204.9	32.3735	-5884.6	1693.78	1284.06	-21.1255	-1303.62	1204.62	-1048.81
270	-15916.7	-17290.6	32268.7	38271.7	119.606	-5867.1	1829.02	1138.08	-110.535	-1125.28	1077.74	-721.779
270.5	-15810.9	-14711.6	31524.5	36282.6	173.66	-5736.12	1931.45	951.107	-390.059	-998.86	912.536	-115.377
271	-15741.7	-12536.7	30807.9	34318.5	156.841	-5648.79	1979.67	827.32	-685.142	-968.179	655.989	564.544
271.5	-15805.9	-10687	30119	32508.4	63.7185	-5660.6	2058.87	822.935	-851.229	-1031.01	320.642	1162.41
272	-16027.6	-9115.08	29470.7	30902.8	-61.3297	-5616.56	2270.71	918.356	-889.959	-1061.46	22.5581	1635.97
272.5	-16330.1	-7729.39	28865	29433.9	-244.407	-5524.08	2550.35	1072	-893.027	-1061.37	-244.573	1909.01
273	-16656.9	-6465.65	28338.1	28062	-463.764	-5459.09	2718.4	1246.4	-893.504	-1150.01	-525.281	1888.76
273.5	-16973.8	-5352.44	27958.3	26864.8	-733.168	-5351.74	2672.91	1360.12	-880.518	-1247.75	-682.558	1667.3
274	-17317.8	-4391.42	27740.7	25882	-1058.2	-5152.2	2458.95	1324.35	-852.251	-1345.05	-626.847	1383.12
274.5	-17684.2	-3477.57	27664.8	25120.4	-1381.97	-4968.69	2219.4	1191.52	-781.349	-1605.55	-456.406	1054.76
275	-17988.1	-2489.42	27735.4	24610.7	-1676.17	-4840.84	2011.92	1063.26	-656.2	-1984.46	-295.145	708.058
275.5	-18259.8	-1431.45	27950.6	24347.4	-1902.7	-4666.37	1820.47	959.749	-532.616	-2295.91	-184.916	422.125
276	-18566.3	-418.633	28206.5	24238	-2050.49	-4447.4	1663.5	879.803	-500.841	-2504.89	-109.489	254.816
276.5	-18931.5	476.766	28465.8	24147.3	-2128.48	-4264.6	1580.25	837.7	-598.943	-2666.28	-49.9927	185.756
277	-19409.3	1364.07	28784.4	24050	-2090.07	-4149.75	1561.19	899.917	-817.84	-2744.94	5.85742	139.742
277.5	-20003.3	2466.64	29098.1	24056.2	-1969.15	-4114.27	1545.51	1115.5	-1046.03	-2613.51	60.248	131.815
278	-20573.1	3916.3	29366.4	24229.2	-1874.23	-4116.97	1535.1	1444.39	-1125.1	-2229.5	130.666	290.796
278.5	-21003	5686.77	29594.6	24426.3	-1772.07	-4123.41	1569.89	1780.32	-1114.76	-1772.4	183.778	702.925
279	-21288	7676.35	29753.5	24485.7	-1536.59	-4122.76	1640.06	1934.24	-1108.82	-1477.27	177.235	1294.48
279.5	-21407.7	9749.38	29891	24428.3	-1168.58	-4100.86	1697.2	1899.54	-982.415	-1355.01	131.131	1844.91
280	-21378.1	11873.4	30014.7	24334.7	-811.81	-4085.26	1708.89	1829.66	-683.533	-1226.57	67.1929	2194.52
280.5	-21253	14195.6	30037.2	24190.1	-564.396	-4034.17	1678.28	1735.21	-292.465	-1002.75	-4.00879	2363.59
281	-21002.8	16685.5	29997	23942.7	-400.21	-3859.87	1638.21	1622.53	110.989	-723.181	-73.2451	2383.24
281.5	-20559	19056.2	29996.3	23595	-288.257	-3614.23	1628.87	1540.14	395.602	-454.397	-101.716	2212.27
282	-20013.3	21126.4	29894	23190.2	-277.706	-3405.73	1667.71	1453.09	491.677	-270.036	-66.79	1861.11
282.5	-19492.8	22871.1	29557.1	22610.2	-387.562	-3293.68	1721.02	1321.52	492.979	-223.357	-33.6563	1426.01
283	-18941.2	24298.1	29099	21697	-536.43	-3287.25	1715.37	1186.76	439.146	-272.408	-57.0327	1062.77
283.5	-18305.8	25326.6	28563	20631.9	-649.784	-3288.42	1700.24	1092.76	258.342	-333.166	-53.7754	826.881
284	-17656.9	25875.2	27818.1	19722.7	-720.46	-3217.89	1740.12	1039.04	15.9088	-362.509	28.4868	667.707
284.5	-17056.9	26043.5	26821.2	19058.8	-763.375	-3169.89	1764.07	979.269	-211.513	-334.513	115.522	542.524
285	-16486.5	25980.3	25740.5	18501.8	-781.42	-3280.45	1740.96	892.791	-485.013	-280.689	151.873	373.935
285.5	-15812.8	25828.6	24613.5	17886.7	-793.439	-3485.46	1727.72	900.084	-730.124	-245.533	177.396	226.032
286	-14916.9	25714.8	23335.7	17338.9	-830.879	-3603.22	1787.44	998.232	-763.32	-235.486	272.068	190.364
286.5	-13880.4	25684.4	21978	17135.3	-848.015	-3637.16	1899.83	1042.35	-588.189	-274.752	352.157	180.504
287	-12788.3	25752.7	20702.7	17275.8	-809.937	-3646.62	2024.95	1058.22	-299.205	-391.244	327.036	105.927
287.5	-11621.7	25860.6	19652.4	17591.1	-766.588	-3553.18	2176.37	1107.67	-1.42429	-567.131	265.081	62.8335
288	-10333.8	25876.9	18912.9	18059.9	-726.987	-3332.18	2299.36	1237.41	157.496	-735.256	183.229	243.851
288.5	-8931.05	25745.9	18451.6	18733.2	-715.047	-3062.84	2340.14	1479.79	177.46	-878.307	98.8569	598.924
289	-7539.03	25464.4	18217	19540.5	-731.71	-2797.43	2388.45	1723.21	116	-1053.94	50.9917	919.932
289.5	-6256.74	24963.6	18308.8	20398	-709.769	-2581.68	2522.14	1871.52	-35.6486	-1178.58	-27.8828	1153.04
290	-5084.09	24225.2	18841.3	21168.4	-619.605	-2461.79	2644.33	1947.25	-277.395	-1096.91	-190.387	1289.67
290.5	-3954.76	23423.5	19788.6	21461.6	-483.172	-2408.67	2668.32	2006.44	-577.529	-807.65	-385.51	1242.86
291	-2821.81	22696.2	21019.8	20996.2	-398.823	-2351.62	2620.42	2068.72	-827.224	-409.017	-592.274	1007.91
291.5	-1713.36	22021.2	22210.8	19906.3	-357.75	-2273.4	2519.51	2095.86	-1020.53	-13.2026	-788.432	727.922
292	-623.097	21381.1	23007.7	18443.1	-281.602	-2193.04	2404.31	2037.04	-1188.01	264.685	-925.575	547.759
292.5	385.592	20758.3	23206.3	16706.9	-183.043	-2104.67	2317.91	1881.3	-1198.37	399.113	-1044.36	462.436
293	1119.44	20122.9	22771.1	14735.7	-80.2549	-1990	2239.76	1707.45	-1043.19	518.145	-1199.21	394.594
293.5	1563.96	19437.7	21804.2	12715.4	-29.3839	-1840.75	2128.2	1613.71	-902.224	693.05	-1353.15	346.925
294	1890.65	18640.8	20340.3	10956.3	0.421509	-1650.78	1987.23	1536.84	-848.205	903.985	-1415.08	327.16
294.5	2147.16	17750.3	18456.1	9618.49	90.4066	-1449.97	1855.67	1393.27	-824.65	1142.61	-1323.46	245.419
295	2257.43	16802.7	16413.6	8658.4	208.825	-1247.25	1774.62	1248.8	-821.231	1314.22	-1041.06	99.0198
295.5	2277.43	15810.6	14477.1	8032.98	346.286	-980.199	1760.81	1159.19	-834.781	1359.55	-582.326	-4.80408
296	2341.57	14809.3	12713.4	7701.88	487.034	-717.854	1810.69	1102.28	-805.496	1368.9	-92.916	-38.0933
296.5	2413.37	13742.9	11089.3	7555.19	520.524	-583.517	1953.91	1064.71	-754.202	1357.07	282.583	65.4663
297	2390.27	12513.4	9624.75	7522.82	425.515	-501.423	2124.41	1080.13	-768.386	1255.28	518.293	315.71
297.5	2259.18	11180.2	8365.51	7631.68	320.771	-367.745	2188.6	1070.19	-816.518	1085.21	606.985	526.71
298	2051.56	9915.99	7324.41	7834.43	297.019	-167.829	2151.37	897.409	-811.172	896.184	568.902	639.31
298.5	1722.34	8796.01	6349.13	7994.63	296.833	84.7223	2040.6	643.476	-797.906	715.554	438.232	739.259
299	1215.36	7825.63	5368.93	8007.85	239.559	303.061	1847.4	421.414	-879.845	564.977	254.164	867.87
299.5	675.516	6942.52	4483.88	7870.79	171.48	421.423	1559.97	233.662	-963.8	403.354	81.1636	1012.74

## Sheet: Fig.10d
Figure 10
Figure 10D
	WT				G369i KI					CaV1.4 KO
	Amplitude (µV)				Amplitude (µV)					Amplitude (µV)
Light intensity (log cd•s/m2)	n1	n2	n3	n4	n1	n2	n3	n4	n5	n1	n2	n3	n4	n5
-4	1.6307	3.68982	1.32823	1.37507	5.00437	3.93913	0.938185	3.49233	2.79488	1.64322	3.22669	0.945385	1.47071	1.25093
-3.5	1.56569	1.1001	1.57871	1.31871	1.91656	3.26039	0.413611	0.309685	1.19653	0.9416	0.621029	1.81971	0.46323	3.00273
-3	2.89471	5.50624	9.29618	8.24511	0.137217	1.26141	0.908586	0.714294	1.8217	1.95321	1.59785	1.63583	1.81178	1.37126
-2.5	68.2332	35.8964	48.9367	73.1231	1.27059	4.49988	4.55977	4.41259	6.16207	2.60229	3.14889	1.85762	2.15415	1.27445
-2	109.607	63.4314	80.3216	119.582	7.51683	8.20136	7.94619	9.00536	8.90785	8.75668	12.1888	11.5189	7.56693	6.83681
-1.5	96.5556	63.6454	66.9623	93.9137	6.03895	9.07302	7.85372	9.32841	9.07173	8.66079	12.9876	8.93469	7.76621	8.06019
-1	56.1677	45.3925	44.1114	53.0705	9.14736	3.23558	5.83791	5.75661	6.51514	5.03718	6.90808	8.95899	6.49352	5.237
-0.5	66.7604	45.0082	45.0131	76.0767	4.58312	2.58463	6.38586	4.68396	7.68401	3.45438	0.85812	1.84953	5.39167	3.65712
0	86.3648	65.5516	61.1771	102.881	8.12717	4.61107	6.42599	10.6461	11.4055	1.22915	1.24004	0.657747	0.349078	1.4012
0.5	92.8427	69.8775	68.8512	109.551	9.69299	6.95163	10.1049	13.1587	13.6351	1.38319	0.711179	0.990265	2.53567	0.639882
1	84.9453	63.5566	66.5014	95.4008	12.8135	9.2751	10.2817	15.7188	15.2027	1.6848	0.328743	1.1618	0.913733	1.04434
1.5	73.1435	55.8561	56.7789	76.4819	13.2014	6.55619	9.82554	15.358	16.8061	1.07396	0.817883	1.22126	1.83983	1.26853
2	64.7641	48.3255	45.2039	74.1949	14.2551	6.46286	10.3172	16.9954	16.7884	1.78201	0.815575	4.95172	0.79922	2.10592
2.5	62.6322	46.4479	43.1792	80.678	15.5475	9.51835	7.58693	17.414	17.89	-0.12528	3.77643	4.44233	1.96483	0.83853

## Sheet: Fig.10f
Scotopic Latency to Platform (s)									Photopic Latency to Platform (s)
WT			G369i KI			CaV1.4 KO			WT			G369i KI			CaV1.4 KO
WT1	26.3333		KI1	68.3333		KO1	90		WT1	28.6667		KI1	13.3333		KO1	54.6667
WT2	20.3333		KI2	55.6667		KO2	60.6667		WT2	25		KI2	38.6667		KO2	90
WT3	15.6667		KI3	83.3333		KO3	84		WT3	12		KI3	31.6667		KO3	31
WT4	11.6667		KI4	79.3333		KO4	90		WT4	12.3333		KI4	39		KO4	65.3333
WT5	19		KI5	32.6667		KO5	85		WT5	25		KI5	23		KO5	90
WT6	13.3333		KI6	59		KO6	90		WT6	41.6667		KI6	31.3333		KO6	53
WT7	14		KI7	29.6667		KO7	90		WT7	31		KI7	53.6667		KO7	86
WT8	12		KI8	24		KO8	79.6667		WT8	20.6667		KI8	25		KO8	77.3333
WT9	10.3333		KI9	40.3333		KO9	72.6667		WT9	31.3333		KI9	30.6667		KO9	47.3333
WT10	11		KI10	42.6667					WT10	34.3333		KI10	15
WT11	21.6667								WT11	19.6667
