# Supplementary material for: A non-conducting role of the Cav1.4 Ca2+ channel drives homeostatic plasticity at the cone photoreceptor synapse
Source: eLife journal article supplement (doi:10.7554/elife.94908), 2024-02-02
Supplement: supp1 [file elife-94908-supp1-v1.pdf]

**Supplementary Table 1. Statistical analysis of visible platform swim test disaggregated by sex**

| <b>Male versus Female WT (Photopic)</b>        | SS    | DF | MS    | F (DFn, DFd)              | P value  |
|------------------------------------------------|-------|----|-------|---------------------------|----------|
| Trial x Genotype                               | 1125  | 5  | 224.9 | F (5, 45) = 0.6060        | P=0.6956 |
| Trial                                          | 3564  | 5  | 712.9 | F (5, 45) = 1.921         | P=0.1096 |
| Genotype                                       | 273.6 | 1  | 273.6 | F (1, 9) = 0.6616         | P=0.4370 |
| Subject                                        | 3722  | 9  | 413.5 | F (9, 45) = 1.114         | P=0.3727 |
| Residual                                       | 16703 | 45 | 371.2 |                           |          |
|                                                |       |    |       |                           |          |
| <b>Male versus Female G369i KI (Photopic)</b>  | SS    | DF | MS    | F (DFn, DFd)              | P value  |
| Trial x Genotype                               | 1457  | 5  | 291.4 | F (5, 45) = 0.5362        | P=0.7477 |
| Trial                                          | 3516  | 5  | 703.2 | F (5, 45) = 1.294         | P=0.2833 |
| Genotype                                       | 1150  | 1  | 1150  | F (1, 9) = 0.8168         | P=0.3897 |
| Subject                                        | 12675 | 9  | 1408  | F (9, 45) = 2.592         | P=0.0168 |
| Residual                                       | 24451 | 45 | 543.4 |                           |          |
|                                                |       |    |       |                           |          |
| <b>Male versus Female Cav1.4 KO (Photopic)</b> | SS    | DF | MS    | F (DFn, DFd)              | P value  |
| Trial x Genotype                               | 1736  | 5  | 347.1 | F (5, 35) = 0.6597        | P=0.6563 |
| Trial                                          | 993   | 5  | 198.6 | F (3,056, 21,39) = 0.3775 | P=0.7737 |
| Genotype                                       | 78.37 | 1  | 78.37 | F (1, 7) = 0.03788        | P=0.8512 |
| Subject                                        | 14481 | 7  | 2069  | F (7, 35) = 3.932         | P=0.0029 |
| Residual                                       | 18416 | 35 | 526.2 |                           |          |
|                                                |       |    |       |                           |          |
| <b>Male versus Female WT (Scotopic)</b>        | SS    | DF | MS    | F (DFn, DFd)              | P value  |
| Trial x Genotype                               | 862   | 5  | 172.4 | F (5, 45) = 0.6907        | P=0.6331 |
| Trial                                          | 914.5 | 5  | 182.9 | F (5, 45) = 0.7328        | P=0.6027 |
| Genotype                                       | 634.7 | 1  | 634.7 | F (1, 9) = 2.121          | P=0.1793 |
| Subject                                        | 2693  | 9  | 299.3 | F (9, 45) = 1.199         | P=0.3193 |
| Residual                                       | 11232 | 45 | 249.6 |                           |          |
|                                                |       |    |       |                           |          |
| <b>Male versus Female G369i KI (Scotopic)</b>  | SS    | DF | MS    | F (DFn, DFd)              | P value  |
| Trial x Genotype                               | 7648  | 5  | 1530  | F (5, 45) = 2.581         | P=0.0390 |
| Trial                                          | 1644  | 5  | 328.8 | F (5, 45) = 0.5547        | P=0.7339 |
| Genotype                                       | 4712  | 1  | 4712  | F (1, 9) = 4.716          | P=0.0580 |
| Subject                                        | 8993  | 9  | 999.2 | F (9, 45) = 1.686         | P=0.1206 |
| Residual                                       | 26671 | 45 | 592.7 |                           |          |
|                                                |       |    |       |                           |          |
| <b>Male versus Female Cav1.4 KO (Scotopic)</b> | SS    | DF | MS    | F (DFn, DFd)              | P value  |
| Trial x Genotype                               | 1727  | 5  | 345.4 | F (5, 35) = 1.470         | P=0.2246 |
| Trial                                          | 12215 | 5  | 2443  | F (2,802, 19,62) = 10.40  | P=0.0003 |
| Genotype                                       | 96.33 | 1  | 96.33 | F (1, 7) = 0.1346         | P=0.7246 |
| Subject                                        | 5011  | 7  | 715.9 | F (7, 35) = 3.046         | P=0.0131 |
| Residual                                       | 8225  | 35 | 235   |                           |          |

Data were analyzed by two-way repeated measures ANOVA. SS, sums of squares; DF, degrees of freedom; MS, mean square; F(DFn, DFd), F statistic.
